# Supplementary material for: Proteome and Phosphoproteome Changes Associated with Prognosis in Acute Myeloid Leukemia
Source: MDPI journal article supplement (doi:10.3390/cancers12030709), 2020-03-17
Supplement: s1 [file s1]

# Proteome and Phosphoproteome Changes Associated with Prognosis in Acute Myeloid Leukemia

Elise Aasebø, Frode S. Berven, Sushma Bartaula-Brevik, Tomasz Stokowy, Randi Hovland, Marc Vaudel, Stein Ove Døskeland, Emmet McCormack, Tanveer S. Batth, Jesper V. Olsen, Øystein Bruserud, Frode Selheim and Maria Hernandez-Valladares

## Supplementary Methods

### *Treatments of AML Patients*

All the patients were treated with intensive induction chemotherapy (seven days of nucleoside analog cytarabine and three days of an anthracycline antibiotic, daunorubicin or idarubicin) and followed up during and after treatment. The patients were further treated with consolidation therapy, which consisted of either high-dose (3 g/m<sup>2</sup>) monotherapy [1] or intermediate-dose (1 g/m<sup>2</sup>) cytarabine in combination with one or two additional cytotoxic drugs.

### *LC-MS/MS Analysis of the AML Proteome and Phosphoproteome*

Dried peptides were dissolved in 2% ACN/0.5 % FA. Peptides (approximately 1 µg for proteomic and phosphoproteomic analysis) were pre-concentrated on a 2 cm × 75 µm ID Acclaim PepMap 100 trapping column and separated on a 50 cm × 75 µm ID EASY-spray PepMap RSLC analytical column (Thermo Scientific, Waltham, MA, USA.). Samples were analyzed on a Q Exactive HF Orbitrap mass spectrometer equipped with an Easy-Spray (Thermo Scientific) and coupled to an Ultimate 3000 Rapid Separation LC system (Thermo Scientific). For the proteomic samples, the peptides were eluted during a 195 min binary gradient with solvent A (0.1% FA) and solvent B (0.1% FA/ACN). The gradient started at 5% B from 0–5 min and increased to 8% B from 5–5.5 min, then to 24% B from 5.5–115 min, to 35% B from 115–140 min, and to 90% B from 140–155 min. Hold at 90% from 155–170 min, then ramped to 5% B from 170–195 min. The first fraction of the three SDB-RPS fractions was eluted with a similar, but slower gradient, with increase from 5–7% B from 5–5.5 min, and from 7–22% B from 5.5–115 min. The Q Exactive HF mass spectrometer was operated in data dependent acquisition (DDA) mode. Full MS scans (scan range 375–1500 m/z) were acquired in profile mode with a resolution  $R = 120\,000$ , a target value of  $3 \times 10^6$  and maximum injection time of 100 ms. MS/MS scans were acquired in centroid mode for the top 12 precursors with intensity threshold  $>5 \times 10^4$  (5.5% underfill ratio). The target ion was set to  $1 \times 10^5$  with a maximum injection time of 110 ms and a resolution  $R = 30\,000$ . The normalized collision energy was 28, the isolation window was 1.6 m/z with 0.3 m/z offset, and the dynamic exclusion lasted for 25 s. For the SILAC samples the lock mass at 445.12003 m/z was enabled. For the phosphoproteomic sample, the phosphopeptides were also eluted during a 195 min binary gradient with the solvents described above. The gradient started at 5% B from 0–5 min and increased to 7% B from 5–6 min, then to 12% B from 6–60 min, to 38% B from 60–145 min, to 90% B from 145–150 min. Hold at 90% from 150–170 min, then ramped to 5% B from 170–175 min and hold at 5% until 195 min. The Q Exactive HF mass spectrometer was also operated in DDA mode with an adjusted acquisition method published by others [2]. Full MS scans (scan range 375–1500 m/z) were acquired in profile mode with a resolution  $R = 60\,000$ , a target value of  $3 \times 10^6$  and maximum fill time of 15 ms. MS/MS scans were acquired in profile mode for the top 10 precursors with intensity threshold  $1 \times 10^5$  (11% underfill ratio). The target ion was set to  $1 \times 10^5$  with a maximum injection time of 110 ms and a resolution  $R = 60\,000$ . The normalized collision energy was 28, the isolation window was 1.2 m/z and the dynamic exclusion lasted for 30 s.

The label-free and super-SILAC proteomic and phosphoproteomic samples were analyzed as three separate experiments in a controlled randomized order (i.e., samples from each patient group were distributed more or less equally over the analysis sequence) with LC-MS quality controls (LC-

MS-QC) run approximately every 10 patient samples. As LC-MS-QC for the label-free experiment, we used a pool of all samples included in the analysis, while a HeLa protein digest and a phosphopeptide pool made in our laboratory were used as LC-MS-QC for the super-SILAC spiked experiments.

#### *MaxQuant Analysis of SILAC-Labeled and Label-Free AML Samples*

MaxQuant parameters were set up for SILAC-labeled samples as follows. Cysteine carbamidomethylation was used as a fixed modification; methionine oxidation, protein N-terminal acetylation, Gln->pyro-Glu and serine/threonine/tyrosine phosphorylation (only for phosphoproteome parameter group) as variable modifications. Trypsin was used as digestion protease. The false discovery rate was set at 0.01 for phosphosites, peptides and proteins. The minimum peptide length allowed was six amino acids. The match-between-runs and re-quantify options were enabled.

All patient lysates were processed and analyzed as label-free samples in a different MaxQuant run and used to support the quantitative results from the super-SILAC data. We used the MaxLFQ quantification [3] for relative label-free quantification, with LFQ count set to 1, where an optimized MaxLFQ algorithm is used to normalize each protein intensity based on peptide ratios measured in all pair-wise comparisons of the entire sample batch. The algorithm performance is optimal for samples of high similarity analyzed on the same LC-gradient (private communication with the developers).

Only protein groups with identical Uniprot accession numbers were matched to the super-SILAC data, hence, we had corresponding label-free quantitative data for 4041 proteins quantified in the super-SILAC dataset.

#### **Supplementary Data**

To compare the results from the super-SILAC mix and label-free datasets, we initially compared the number of quantified proteins per patient sample. The quantified protein numbers in the super-SILAC experiment ranged from 4350 to 5248 proteins per patient, with an average of 4944 proteins. When comparing to the label-free analysis, we observed that analysis of the same patient sample by two quantification methods produced similar numbers of quantified proteins (Figure S1). The average number of proteins quantified per patient sample in the label-free analysis was 4857 proteins; however, the number per patient varied more in this dataset, ranging from 3573 to 5222 proteins. Thus, we had more equal protein number measurements in the super-SILAC dataset, possibly due to peptide fractionation, which increases the detection of low abundant peptides. We further assessed the similarity between super-SILAC and label-free measurements by correlating the fold changes (FC) between the RELAPSE and REL\_FREE groups (Pearson  $R = 0.72$ ) (Figure S2). The good FC correlation indicated high similarity between the two different proteomic quantitation approaches. The SILAC data is generally considered as one of the most accurate quantification methods in large-scale proteomics because the internal standard is added to the sample before sample preparation [4]. Finally, the expression difference of 150 of the 351 significantly regulated proteins in the super-SILAC experiment, i.e., 87 increased and 63 decreased, was supported by the label-free dataset ( $p < 0.05$ ). Hierarchical clustering using the super-SILAC and label-free protein ratios/abundances of these 150 regulated proteins produced comparable clustering of the AML patients (Figure S3).

## Supplementary Figures

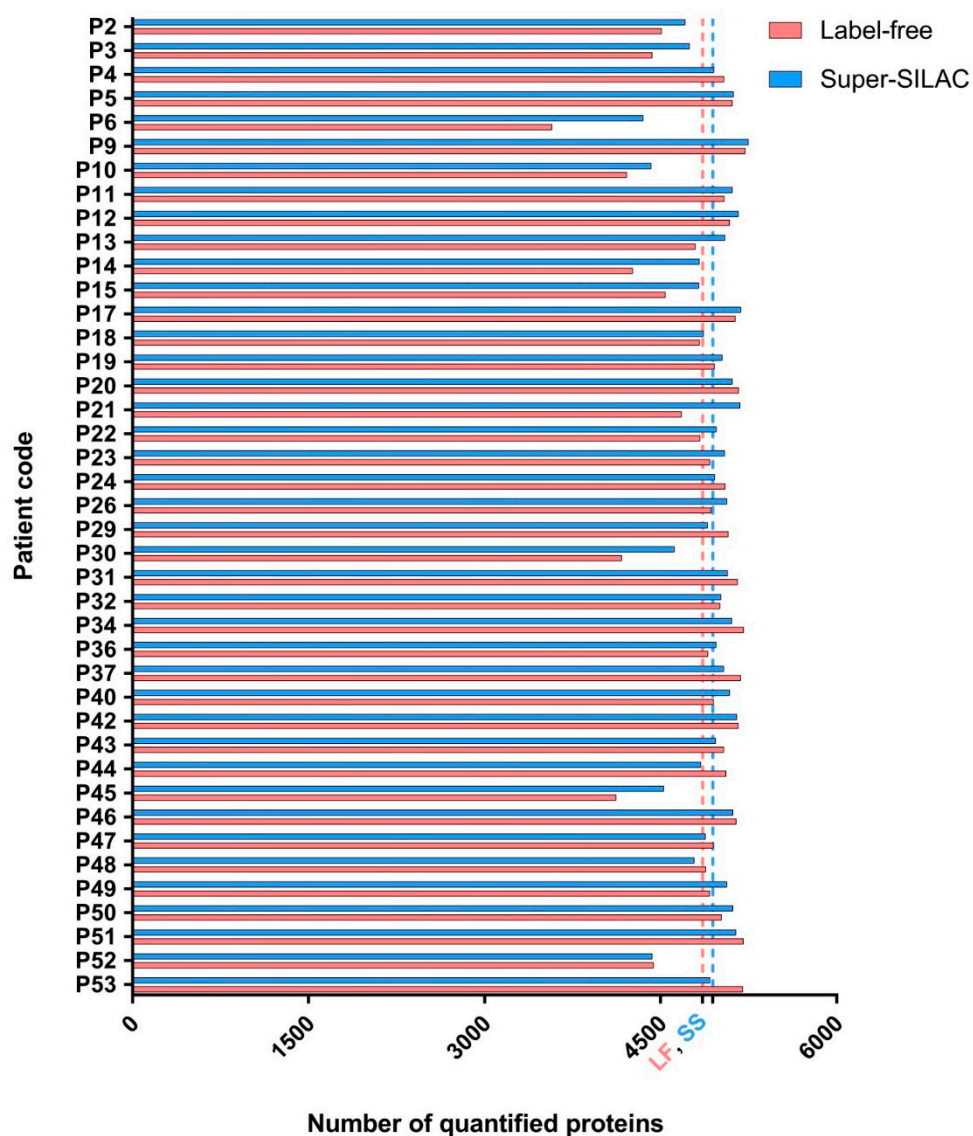

**Figure S1.** The number of quantified proteins per patient sample is similar with label-free and super-SILAC based quantification. The average numbers of quantified proteins per approach is indicated by the dotted line, i.e., 4857 proteins with label-free and 4944 with super-SILAC based quantification. Patient samples with few quantified proteins in one experiment, typically have few quantified proteins in the other experiment as well (e.g., P6 and P45).

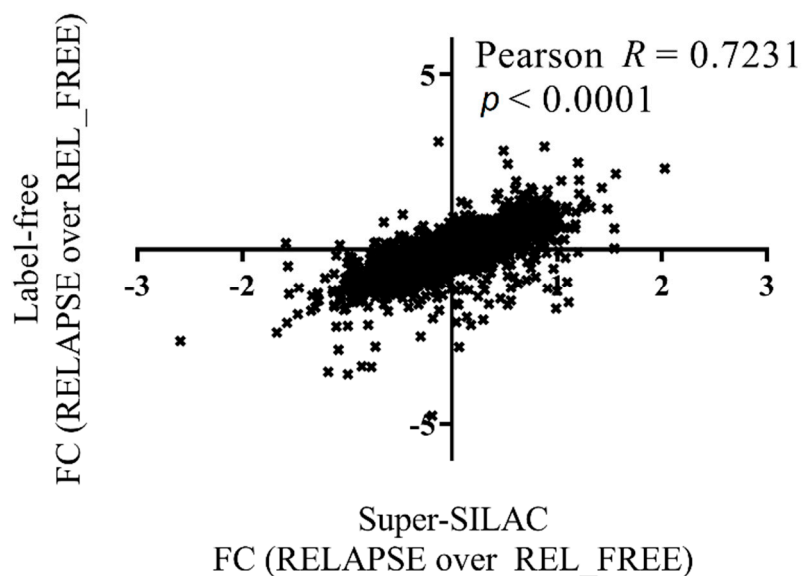

**Figure S2.** The FCs of RELAPSE vs REL\_FREE proteins correlate in the super-SILAC and label-free datasets. Pearson  $R$  value and correlation plot of protein FCs obtained from label-free vs. super-SILAC experiments comparing 26 RELAPSE and 15 REL\_FREE patient samples.

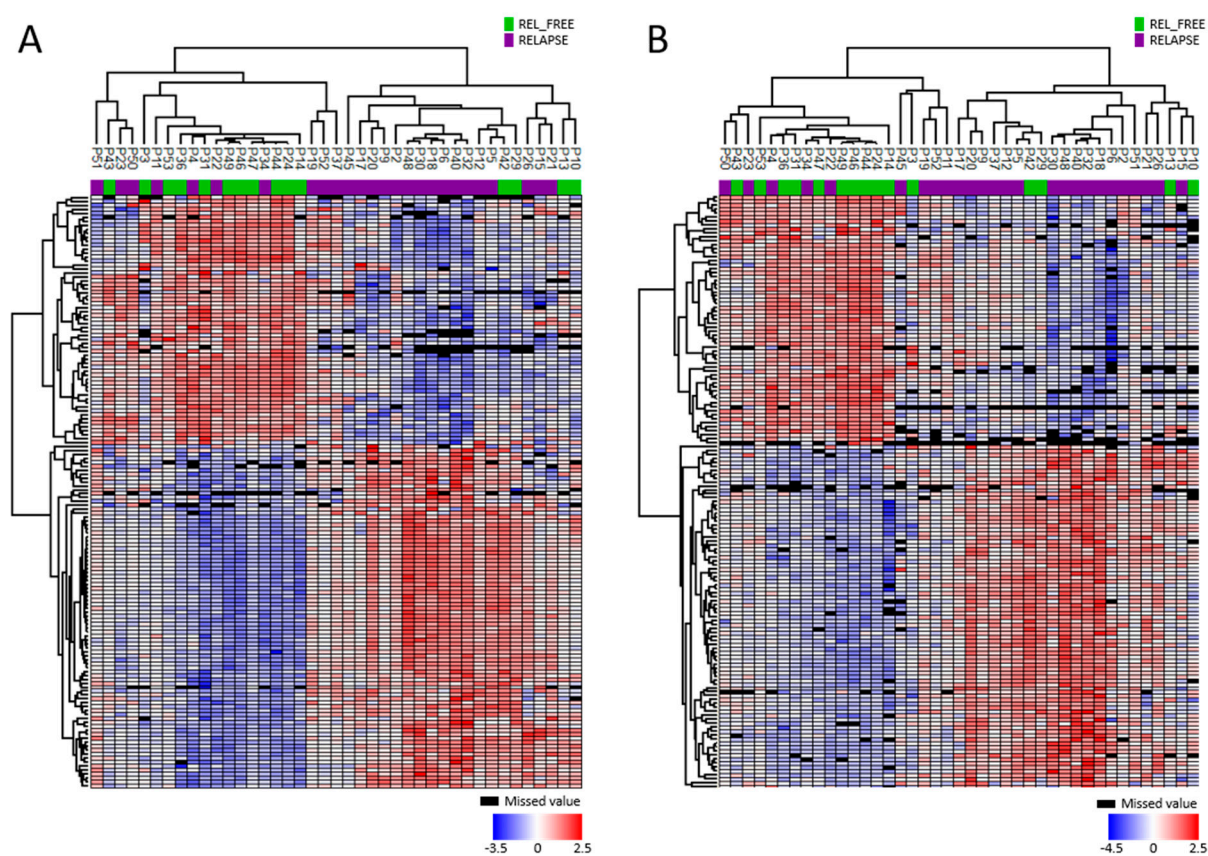

**Figure S3.** Clustering performance of 150 proteins validated by label-free proteomics. Of the 351 regulated proteins in the super-SILAC dataset, were 150 proteins regulated in the label-free dataset. Hierarchical clustering of the (a) the 150 proteins in the super-SILAC dataset and (b) the same 150 proteins using label-free data showed similar clustering performance.

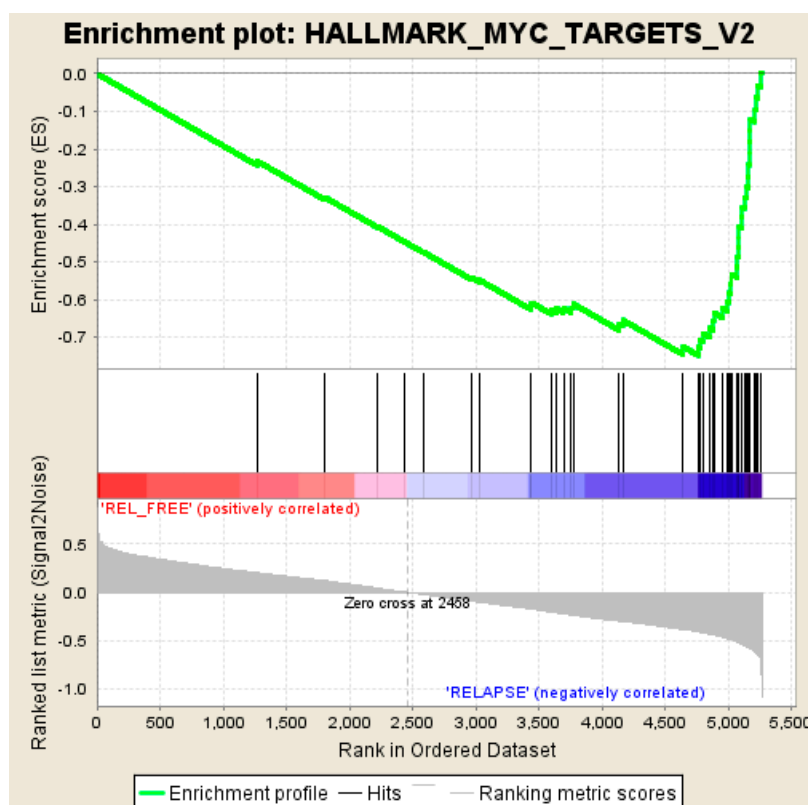

**Figure S4.** GSEA analysis. GSEA using the 5309 proteins in the RELAPSE vs. REL\_FREE cohort study as input data against the Hallmark gene set collection. HALLMARK\_MYC\_TARGETS\_V2 was significantly enriched in the RELAPSE group (Nominal  $p < 0.01$ , FDR  $q = 0.0461$ , Normalized enrichment score (NES) =  $-1.8378$ ). The gene set comprises the 58 following genes: AIMP2, BYSL, CBX3, CDK4 \*, DCTPP1, DDX18, DUSP2\*, EXOSC5, FARSA, GNL3, GRWD1, HK2, HSPD1, HSPE1, IMP4, IPO4, LAS1L, MAP3K6 \*, MCM4, MCM5, MPHOSPH10, MRTO4, MYBBP1A, MYC \*, NDUF4F4, NIP7, NOC4L, NOLC1, NOP16, NOP2, NOP56, NPM1, PA2G4, PES1, PHB, PLK1 \*, PLK4 \*, PPAN, PPRC1 \*, PRMT3, PUS1, RABEPK, RCL1, RRP12, RRP9, SLC19A1 \*, SLC29A2 \*, SORD, SRM, SUPV3L1, TBRG4, TCOF1, TFB2M, TMEM97 \*, UNG \*, UTP20, WDR43, WDR74 (underlined gene names indicate the 30 proteins contributing the leading edge subset; \* indicates 11 proteins that were not quantified in our data).



**a**

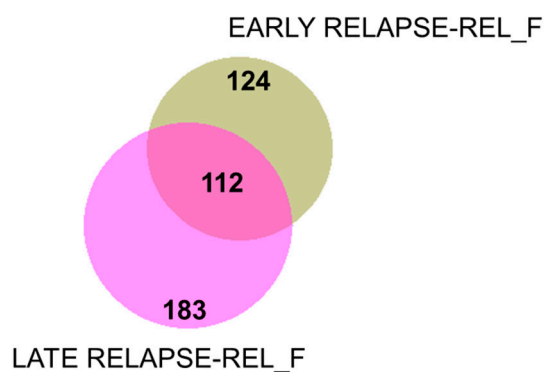

**b**

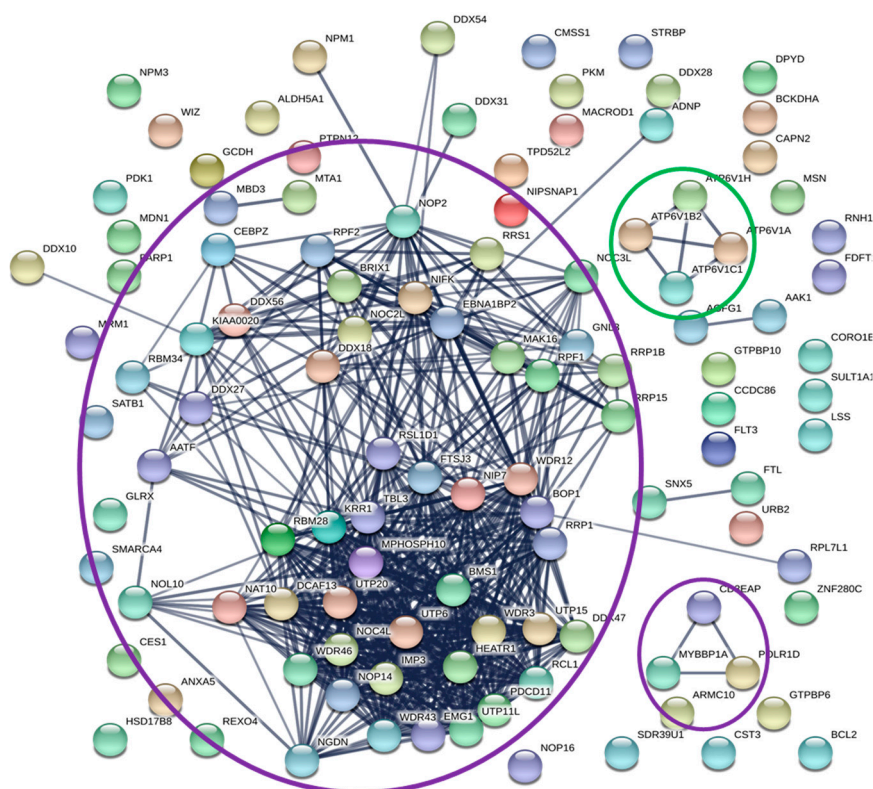

**Figure S5.** Comparison between the differentially expressed proteins found in the EARLY RELAPSE vs. REL\_FREE (EARLY RELAPSE-REL\_F in the plot) and LATE RELAPSE vs. REL\_FREE (LATE RELAPSE-REL\_F in the plot) subcohorts. **(a)** Overlap of the regulated proteins found in the two subcohorts illustrated with a Venn diagram. **(b)** PPI network performed with STRING of the 112 overlapped regulated proteins. Protein networks characterized in Figure 2c of the main text are highlighted here with a colored oval (purple for protein networks with higher abundance in RELAPSE and green with higher abundance in REL\_FREE). Black edges mean confidence at 0.7 as interaction score.

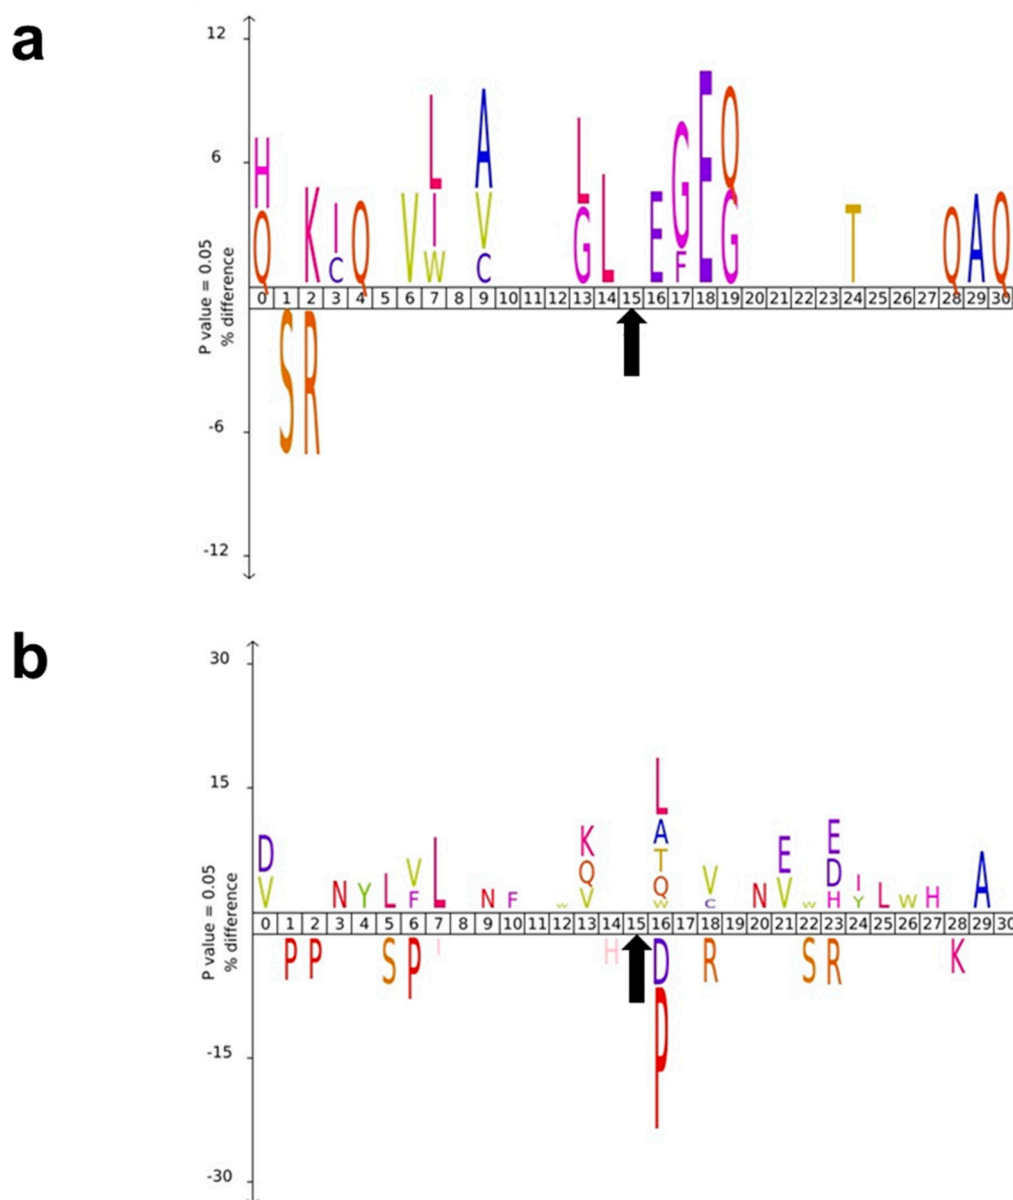

**Figure S6.** IceLogos of the 31 amino acid sequence windows surrounding phosphorylation sites (location marked with an arrow). **(a)** Alignment of the sequence windows of 138 phosphosites upregulated in the RELAPSE group using the sequence windows from unregulated phosphosites as the reference set. **(b)** Alignment of the sequence windows of 136 phosphosites upregulated in the REL\_FREE group using the sequence windows from unregulated phosphosites as the reference set.

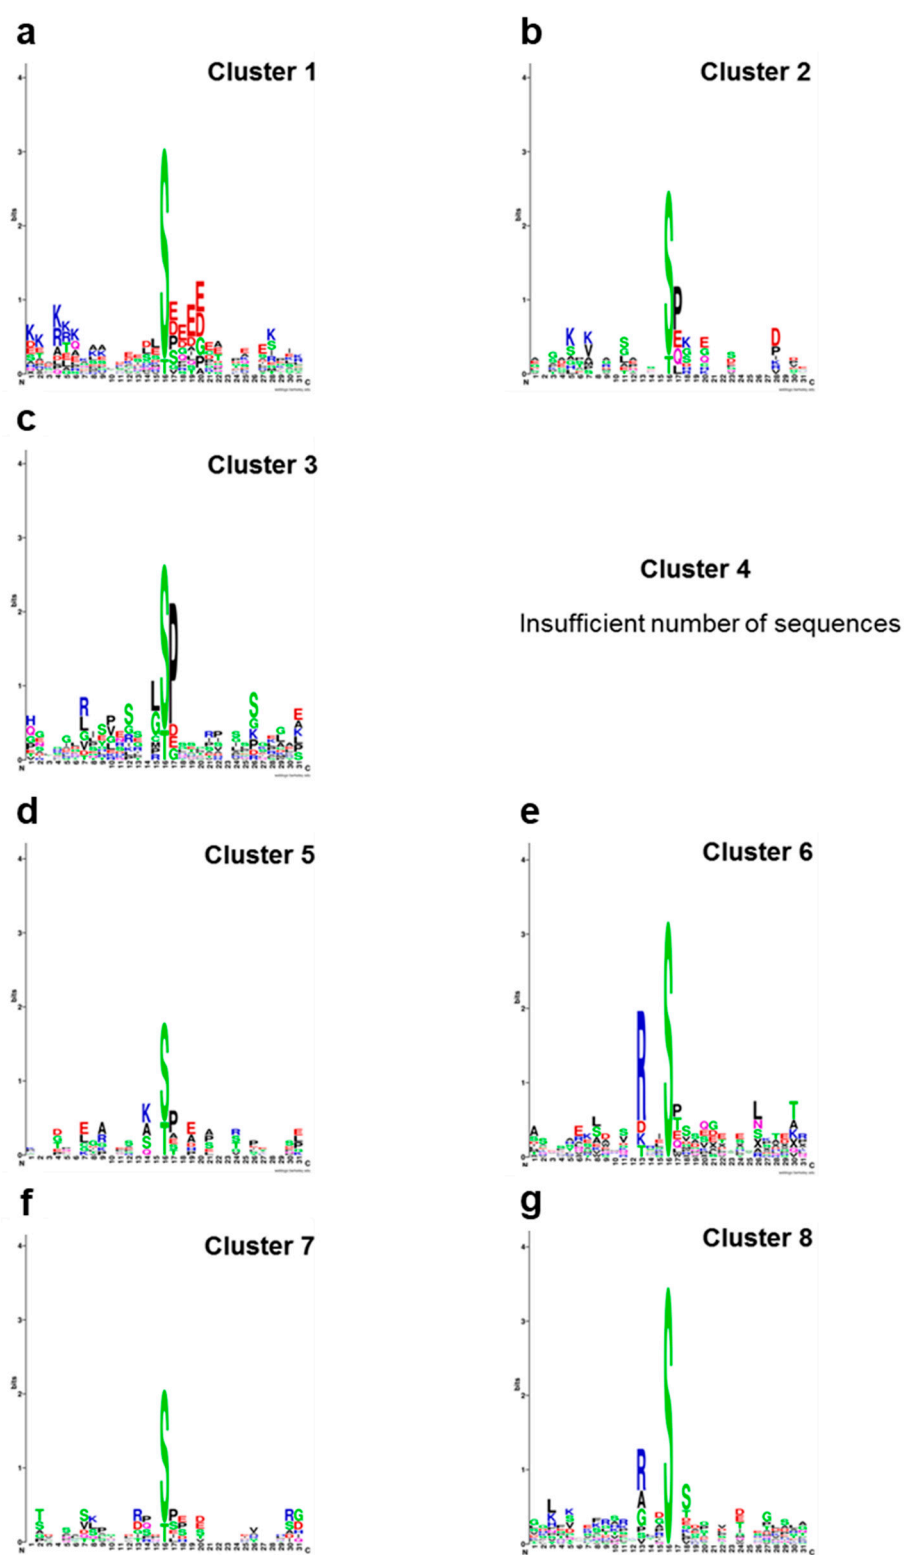

**Figure S7.** Sequence logo analysis of the 31 amino acid sequence windows surrounding phosphorylation sites (located on position 16 on the X axis) of ClusterOne protein networks showed in Figure 3e on the main text.



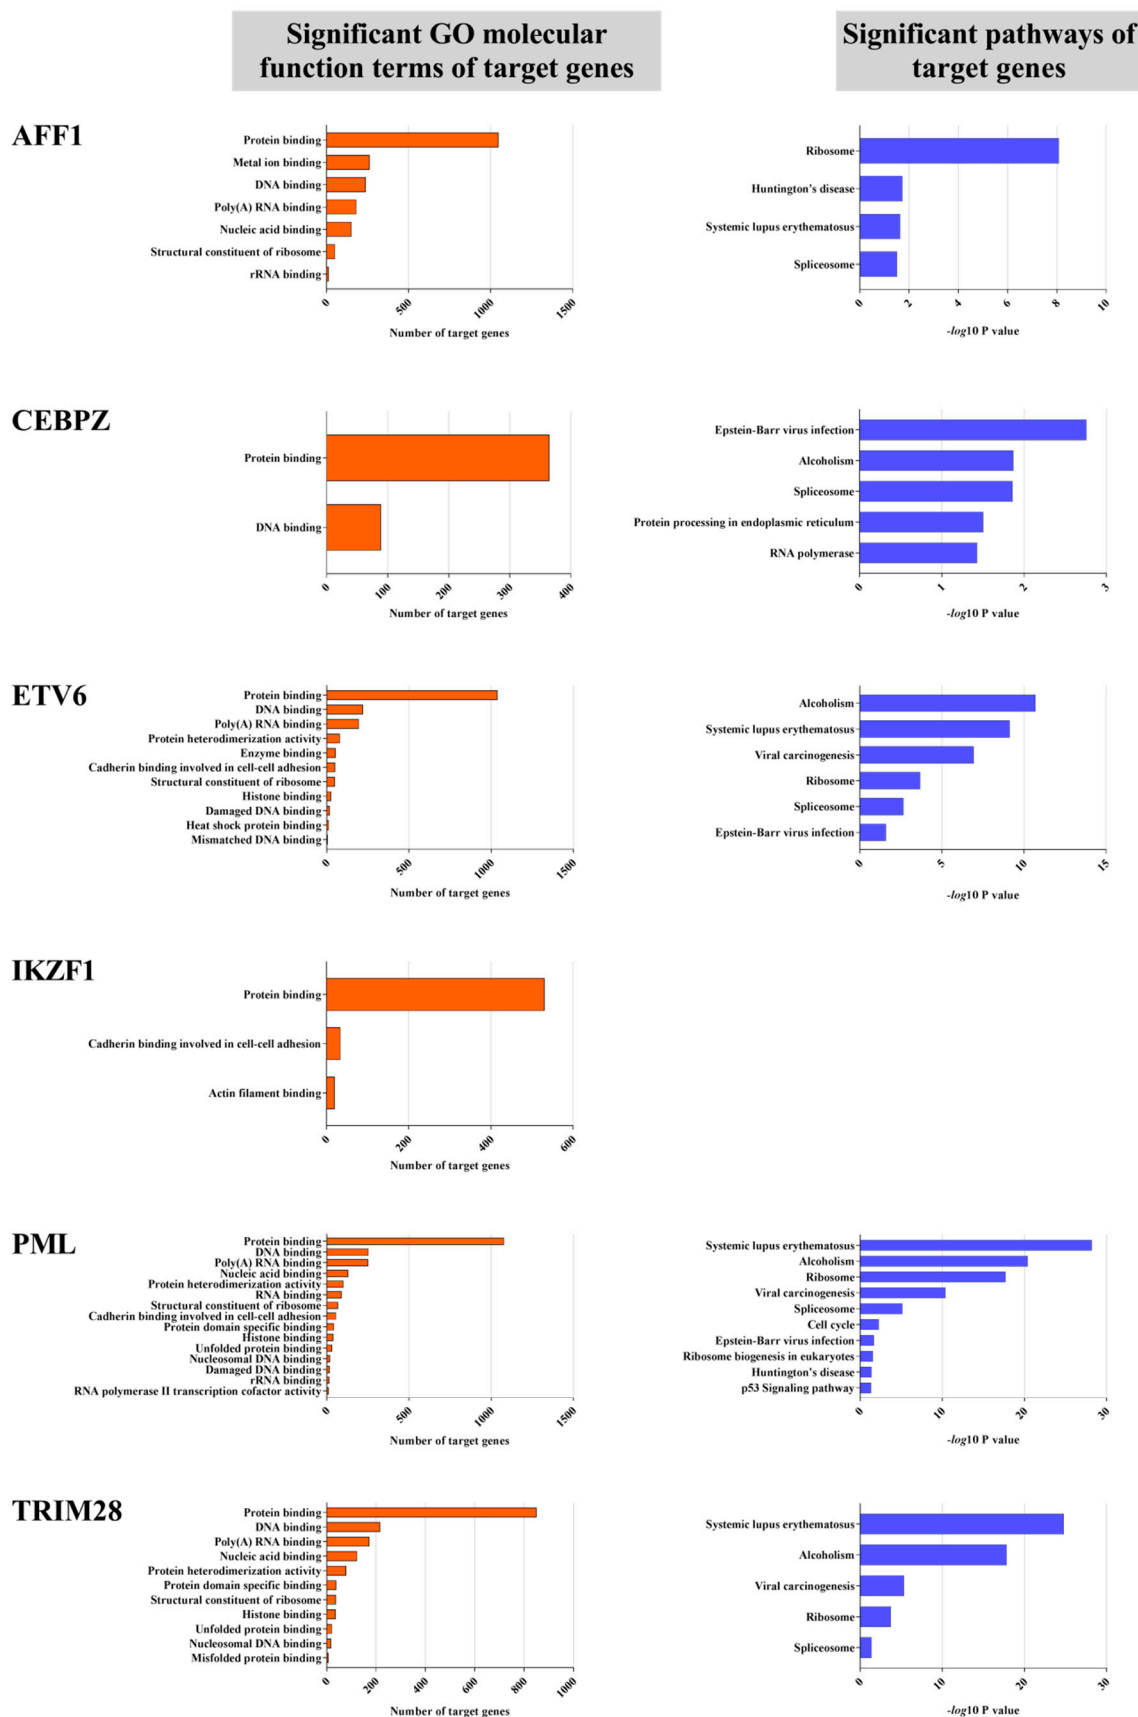

**Figure S8.** Significant GO molecular function terms and KEGG pathways of target genes predicted from analysis of ChIP-seq data of transcription proteins. All GO terms and pathways were

significantly over-represented with Benjamini-Hochberg adjusted  $p$  values  $< 0.05$ . Number of target genes and enrichment significance are shown for GO molecular function and pathways terms, respectively. Huntington's disease pathway involves gene transcription, vesicular transport, oxidative phosphorylation and apoptosis elements. Systemic lupus erythematosus involves T-cell receptor signaling, nucleosome, complement and coagulation cascade, and leukocyte transendothelial migration elements. Alcoholism involves PKA and MAPK signaling elements. Epstein Barr virus infection involves B cell receptor signaling, proteasome, basal transcription factors and MAPK signaling elements.

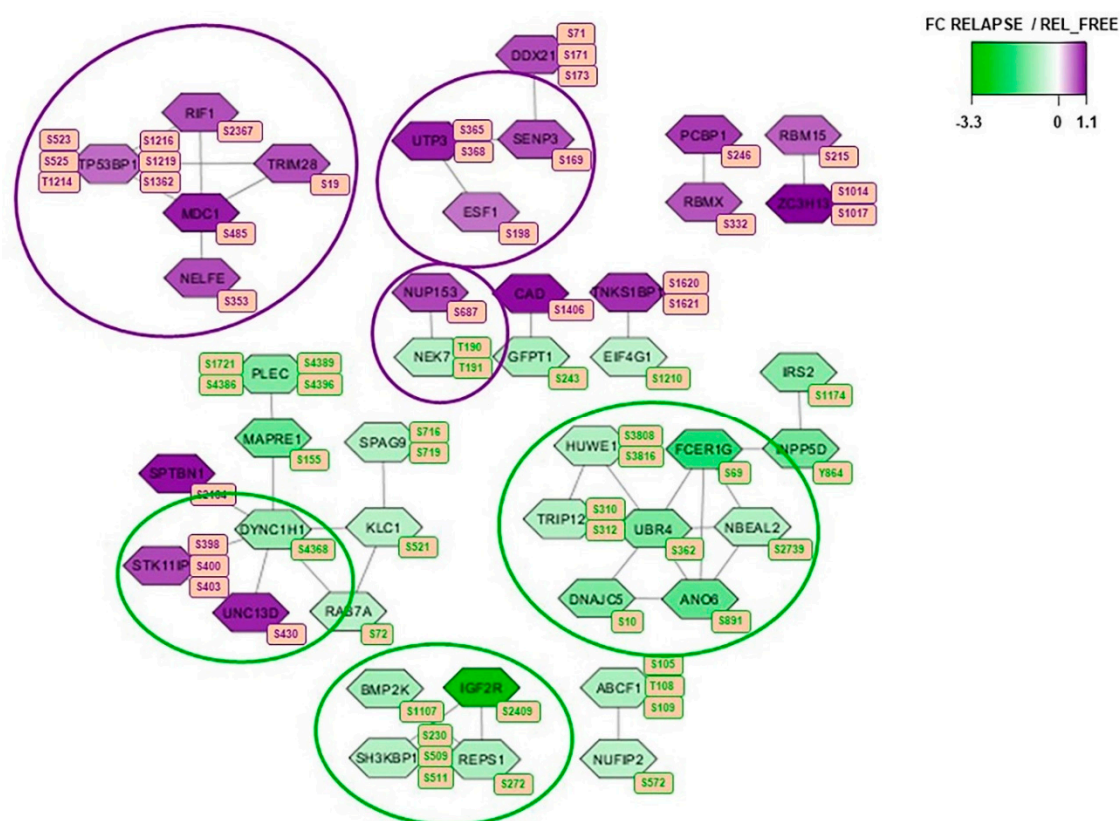

**Figure S9.** Phosphoproteins with differentially regulated phosphorylation sites in the RELAPSE vs. REL\_FREE cohort dataset with unaltered overall expression. Networks of PPI based on STRING analysis of 107 phosphoproteins that were not significantly changed at the protein level, visualized in Cytoscape. The differentially regulated phosphorylation site(s) is shown next to each protein. FCs of phosphorylation are color-coded; purple-colored proteins showed a higher phosphorylation in the RELAPSE group and green-colored proteins showed a higher phosphorylation in the REL\_FREE group. Encircled phosphoproteins networks represent phosphoproteins networks previously illustrated in Figure 3e in the main text.

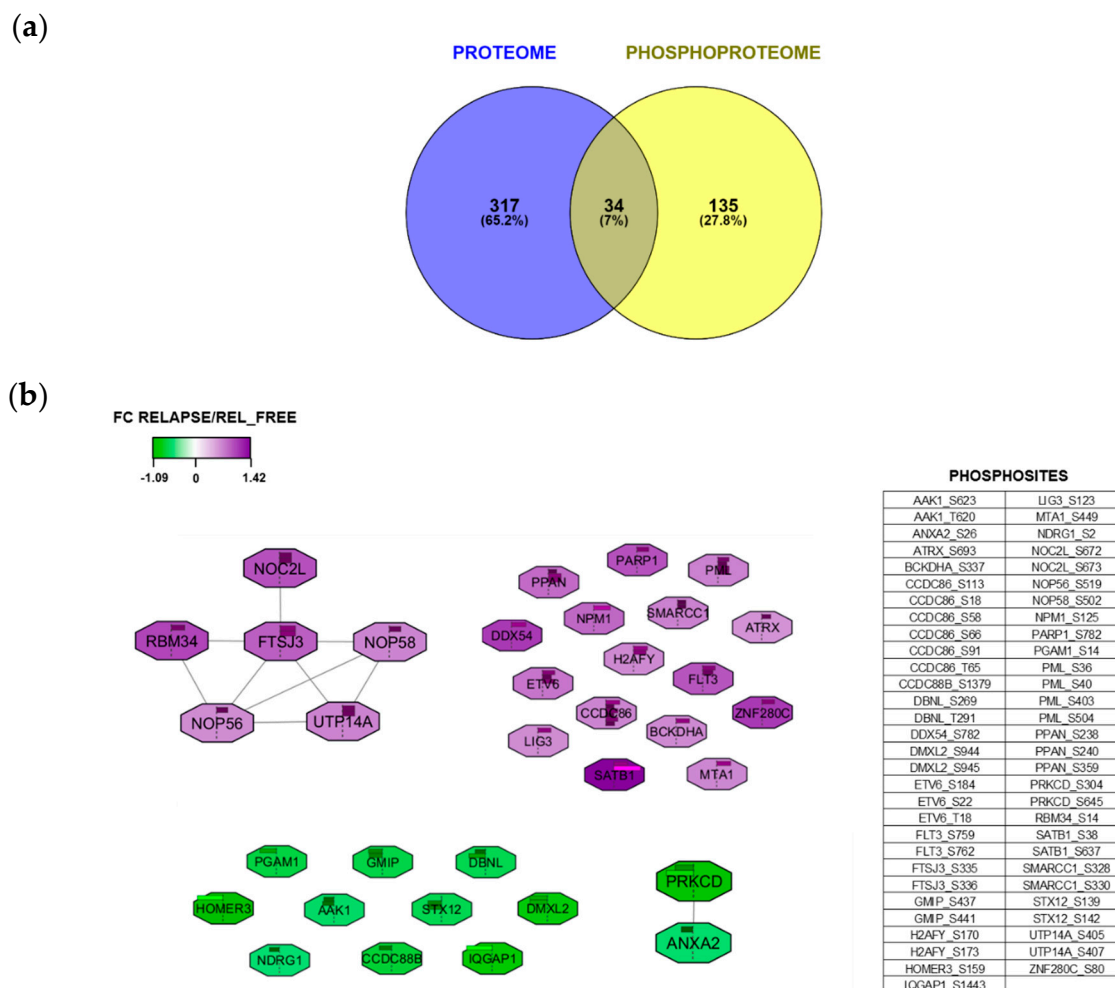

**Figure S10.** Overlap of regulated proteins and phosphoproteins in the RELAPSE *vs* REL\_FREE cohort study. (a) Venn diagram of significantly different proteins and phosphoproteins found in the proteome and phosphoproteome data analysis, respectively. (b) Cytoscape representation of the 34 proteins that are found differently abundant and phosphorylated in the proteome and phosphoproteome data analysis, respectively, i.e. at both protein and phosphosite level. Nodes are colored based on log<sub>2</sub> transformed FCs of protein expression levels; purple-colored proteins showed a higher expression in the RELAPSE group and green-colored proteins showed a higher expression in the REL\_FREE group. Node heat strips show FC of the different phosphosites found in each protein and listed in the shown table.

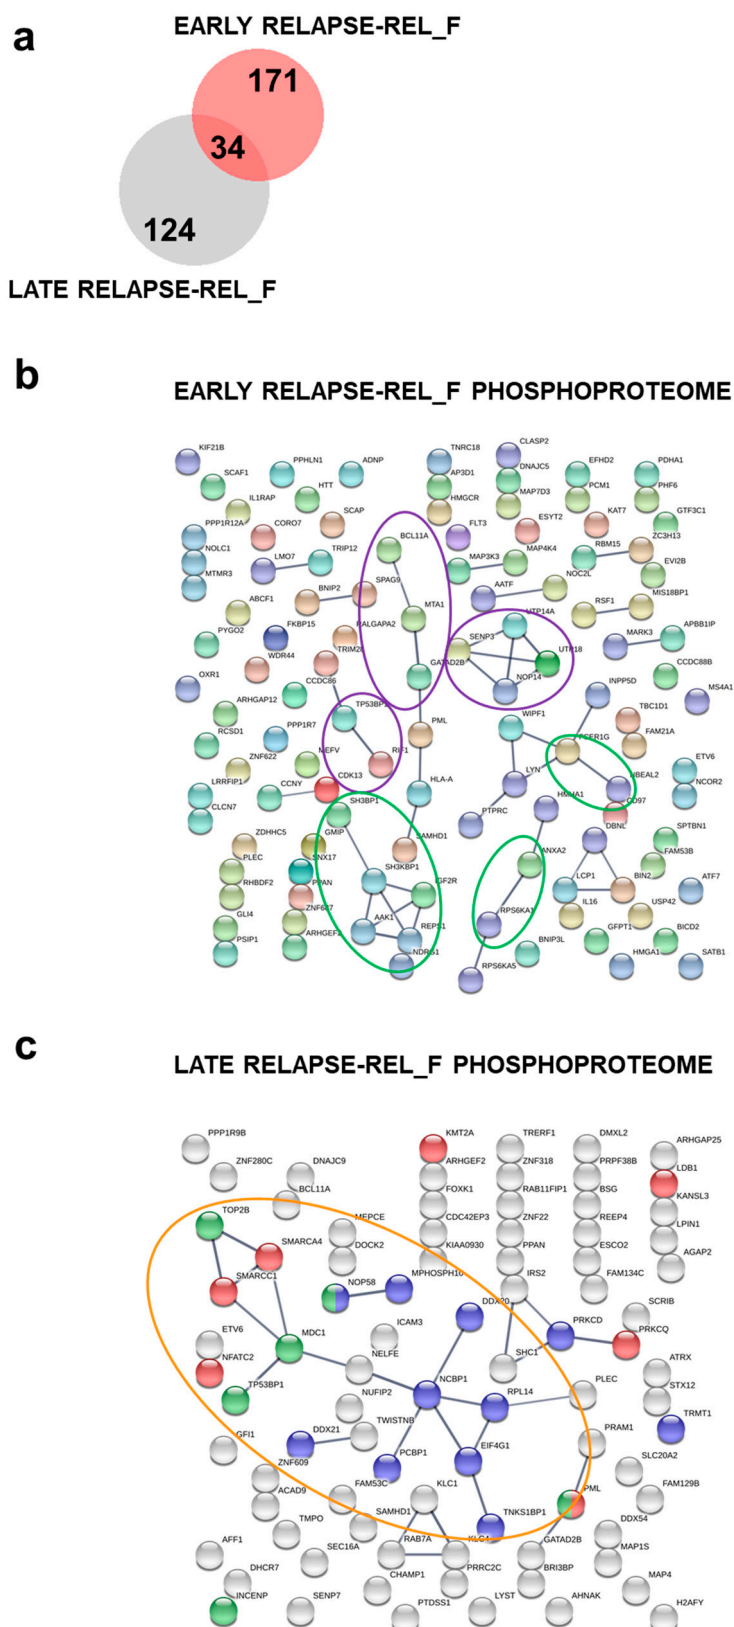

**Figure S11.** Comparison between the differentially regulated phosphorylation sites found in the EARLY RELAPSE vs. REL\_FREE (EARLY RELAPSE-REL\_F in the plots) and LATE RELAPSE vs. REL\_FREE (LATE RELAPSE-REL\_F in the plots) subcohorts. **(a)** Overlap of the differentially regulated phosphorylation sites found in the two subcohorts illustrated with a Venn diagram. **(b)** PPI network performed with STRING of the 171 phosphoproteins found in the EARLY RELAPSE vs.

REL\_FREE subcohort. Components of phosphoprotein networks characterized in Figure 3e of the main text are highlighted here with a colored oval (purple for protein networks with higher phosphorylation in RELAPSE and green with higher phosphorylation in REL\_FREE). Black edges mean confidence at 0.7 as interaction score. (c) PPI network performed with STRING of the 124 phosphoproteins found in the LATE RELAPSE vs. REL\_FREE subcohort. A new network composed of RNA metabolism phosphoproteins (blue nodes), transcriptional regulators (red nodes) and SUMOylate target proteins (green nodes) is highlighted here with an orange oval.

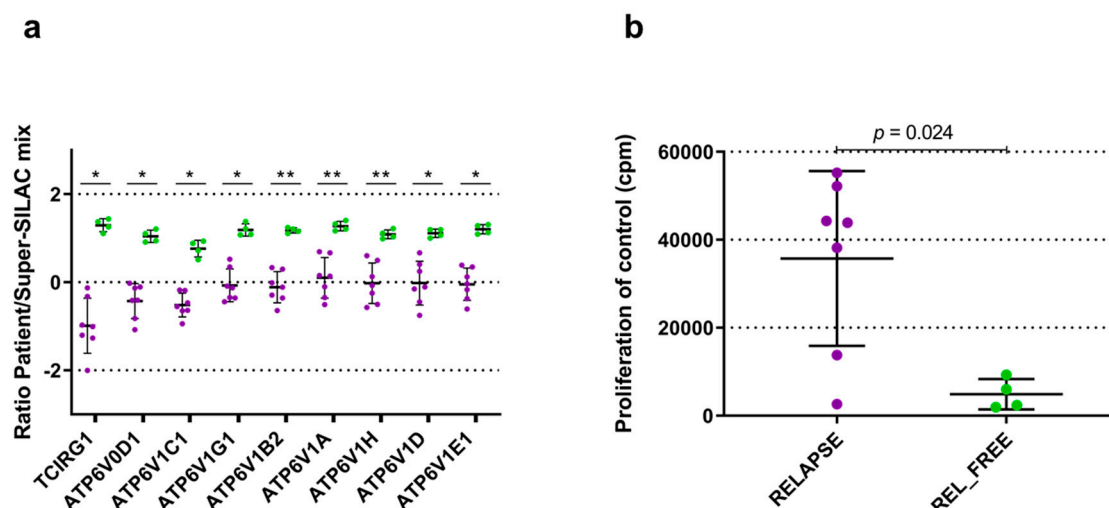

**Figure S12. V-ATPase inhibitor assays.** The proteomics results pointed to significantly different abundance of the proteins composing the V-ATPase complex. **(a)** For V-ATPase inhibitor testing, we selected four REL\_FREE patients (P36, P44, P46 and P49) and seven RELAPSE patients (P9, P12, P15, P17, P18, P40 and P48) that had significantly higher and lower abundance of the V-ATPase subunits (according to the two-sample unequal variance *t*-test), respectively, in the super-SILAC proteomics experiment. The plot shows the relative protein expression ( $\log_2$  transformed ratio patient/super-SILAC mix) of the significantly different V-ATPase subunits quantified in each patient sample (\*  $p < 0.05$ ; \*\*  $p < 0.01$ ). **(b)** The RELAPSE control cells had significantly higher proliferation than the REL\_FREE cells.

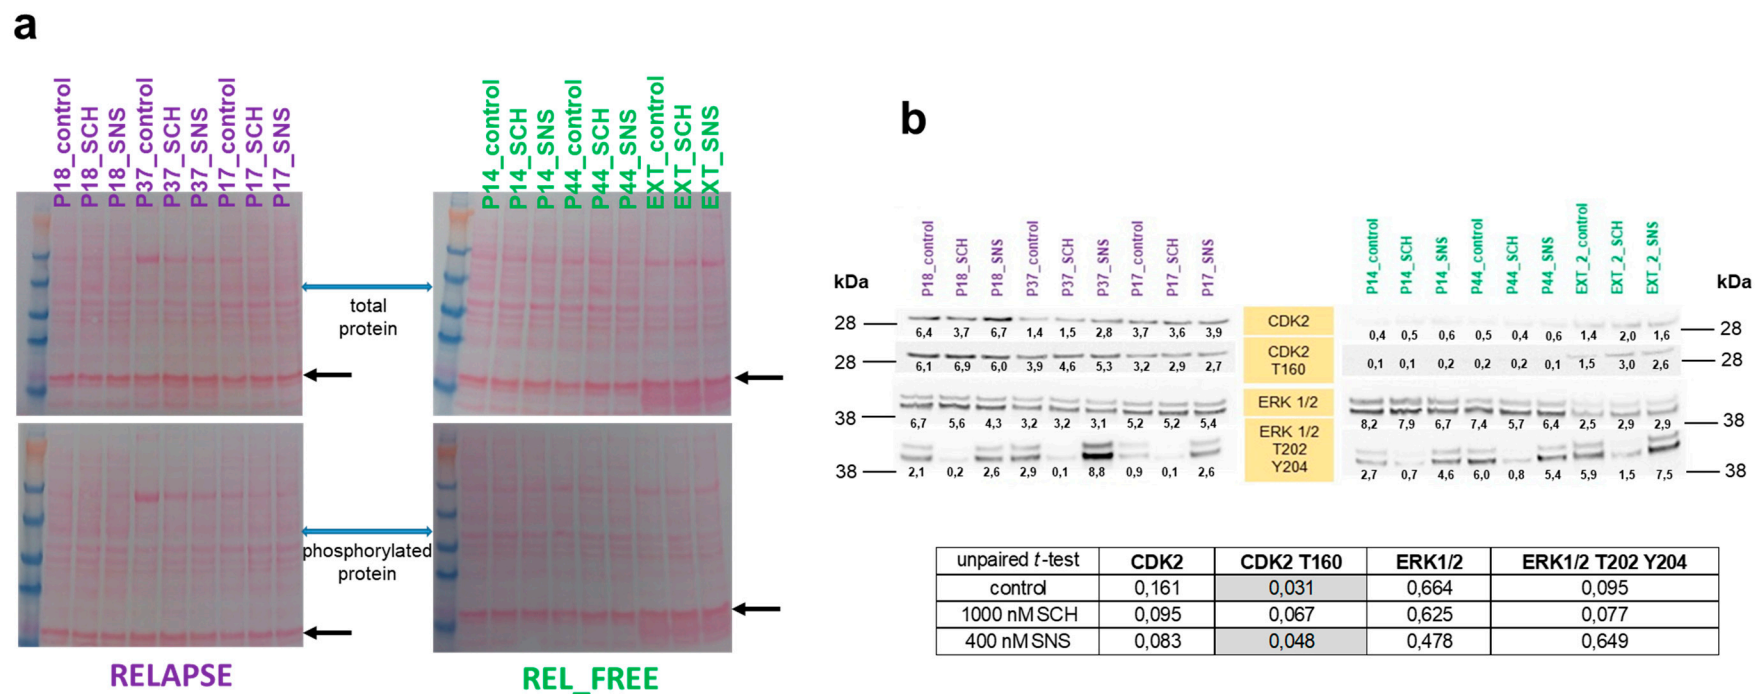

**Figure S13.** Ponceau-stained membranes and Western blots. (a) Ponceau-stained membranes, used as loading controls (the arrows mark the 17kDa-band intensity taking for normalization purposes), and (b) Western blots of sample lysates from primary cells of three RELAPSE and three REL\_FREE patients untreated and treated with inhibitors against ERK1/2 (SCH: SCH772984) and CDK2/7/9 (SNS: SNS032). EXT refers to a REL\_FREE patient outside the cohort used in this study. Western blots were not replicated. Band intensities of total and phosphorylated proteins were normalized before statistical analysis and intensity ratios from Table S6 are displayed under each band. RELAPSE and REL\_FREE groups were compared using unpaired *t*-test. Grey cells show significance with  $p < 0.05$ .



## Supplementary Tables

Table S1. Overview of the 41 AML patients used in this study.

| Experimental patient code | BM blasts (%) | WBC count (10 <sup>9</sup> /L) | Gender | Age (years) | Clinical progression      | Secondary AML | Time to relapse (months after diagnosis) | Survival time (months after diagnosis) (updated on 24/7/18) | Still alive (+)                   | Group    | FAB classification | NPM1 |     | SIGNALING |          |      | TUMOR SUPPRESSORS |     |       | DNA METHYLATION |        | MYELOID TF | CHROMATIN MODIFICATION |     | COHESIN | SPLICEOSOME/TR | OTHERS |      | Cytogenetics |      |      |       |       |       |       |       |                                                          |       |       |                                                              |                          |
|---------------------------|---------------|--------------------------------|--------|-------------|---------------------------|---------------|------------------------------------------|-------------------------------------------------------------|-----------------------------------|----------|--------------------|------|-----|-----------|----------|------|-------------------|-----|-------|-----------------|--------|------------|------------------------|-----|---------|----------------|--------|------|--------------|------|------|-------|-------|-------|-------|-------|----------------------------------------------------------|-------|-------|--------------------------------------------------------------|--------------------------|
|                           |               |                                |        |             |                           |               |                                          |                                                             |                                   |          |                    | Ins  | Del | FLT3-TD   | FLT3-TSD | NRAS | HRAS              | KIT | PTEN1 | IKZF1           | CDKN2A |            | PHF6                   | WT1 |         |                | DNMT3A | TET2 |              | IDH1 | IDH2 | KMT2A | RUNX1 | CEPBA | GATA2 | ASXL1 | EZH2                                                     | KDM6A | RAD21 | STAG2                                                        | BCORL1                   |
| P2                        | 90            | 19                             | M      | 29          | CR1 - RELAPSE             |               | 12                                       | 12                                                          |                                   | RELAPSE  | M4                 |      |     |           |          |      |                   |     |       |                 |        |            |                        |     |         |                |        |      |              |      |      |       |       |       |       |       | 46,XY                                                    |       |       |                                                              |                          |
| P3                        | 25            | 6                              | M      | 56          | CR1 - REL_FREE            |               | -                                        | 120                                                         | death after 10 years (no relapse) | REL_FREE | M1                 |      |     |           |          |      |                   |     |       |                 |        |            |                        |     |         |                |        |      |              |      |      |       |       |       |       |       | 46,XY,inv(1)(p22)(p347)t(2;10)(q33;q22);t(9;22)(q34;q11) |       |       |                                                              |                          |
| P4                        | 53            | 45                             | M      | 60          | CR1 - RELAPSE             |               | 4                                        | 4                                                           |                                   | RELAPSE  |                    |      |     |           |          |      |                   |     |       |                 |        |            |                        |     |         |                |        |      |              |      |      |       |       |       |       |       |                                                          |       |       |                                                              |                          |
| P5                        | 80            | 43                             | M      | 27          | CR1 - Relapse - CR2 - SCT |               | 11                                       | 274                                                         | +                                 | RELAPSE  | M2                 |      |     |           |          |      |                   |     |       |                 |        |            |                        |     |         |                |        |      |              |      |      |       |       |       |       |       |                                                          |       |       | 46,XY                                                        |                          |
| P6                        | 95            | 10                             | F      | 66          | CR1 - RELAPSE             |               | 16                                       | 19                                                          |                                   | RELAPSE  | M1                 |      |     |           |          |      |                   |     |       |                 |        |            |                        |     |         |                |        |      |              |      |      |       |       |       |       |       |                                                          |       |       | 46,XX                                                        |                          |
| P9                        | 84            | 27                             | M      | 46          | CR1 - RELAPSE             |               | 27                                       | 39                                                          |                                   | RELAPSE  | M1                 |      |     |           |          |      |                   |     |       |                 |        |            |                        |     |         |                |        |      |              |      |      |       |       |       |       |       |                                                          |       |       | 46,XY                                                        |                          |
| P10                       | 89            | 11                             | M      | 57          | CR1 - REL_FREE            |               | -                                        | 96                                                          | died of another cancer            | REL_FREE | M4                 |      |     |           |          |      |                   |     |       |                 |        |            |                        |     |         |                |        |      |              |      |      |       |       |       |       |       |                                                          |       |       | 46,XY                                                        |                          |
| P11                       | 40            | 34                             | F      | 18          | CR1 - Relapse - CR2 - SCT |               | 11                                       | 89                                                          | +                                 | RELAPSE  | M4                 |      |     |           |          |      |                   |     |       |                 |        |            |                        |     |         |                |        |      |              |      |      |       |       |       |       |       |                                                          |       |       | 46,XX,inv(16)(q13;q22)                                       |                          |
| P12                       | 66            | 25                             | F      | 46          | CR1 - Relapse - CR2 - SCT |               | 16                                       | 99                                                          | +                                 | RELAPSE  | M1                 |      |     |           |          |      |                   |     |       |                 |        |            |                        |     |         |                |        |      |              |      |      |       |       |       |       |       |                                                          |       |       | 46,XX,inv(16)(p13;q22)                                       |                          |
| P13                       | 75            | 22                             | F      | 45          | CR1 - REL_FREE            | Chemotherapy  | -                                        | 195                                                         | +                                 | REL_FREE | M4                 |      |     |           |          |      |                   |     |       |                 |        |            |                        |     |         |                |        |      |              |      |      |       |       |       |       |       |                                                          |       |       | 46,XX                                                        |                          |
| P14                       | 86            | 40                             | F      | 42          | CR1 - REL_FREE            |               | -                                        | 150                                                         | +                                 | REL_FREE | M5                 |      |     |           |          |      |                   |     |       |                 |        |            |                        |     |         |                |        |      |              |      |      |       |       |       |       |       |                                                          |       |       | 46,XX                                                        |                          |
| P15                       | 60            | 21                             | F      | 67          | CR1 - RELAPSE             |               | 13                                       | 14                                                          |                                   | RELAPSE  | M0                 |      |     |           |          |      |                   |     |       |                 |        |            |                        |     |         |                |        |      |              |      |      |       |       |       |       |       |                                                          |       |       | 48,XX,-6,-21,ms(4)(46,XX)(17)                                |                          |
| P17                       | 53            | 14                             | M      | 60          | CR1 - RELAPSE             |               | 6                                        | 7                                                           |                                   | RELAPSE  | M4                 |      |     |           |          |      |                   |     |       |                 |        |            |                        |     |         |                |        |      |              |      |      |       |       |       |       |       |                                                          |       |       | 46,XY,del(9)(q13;q33)(18)                                    |                          |
| P18                       | 83            | 58                             | F      | 59          | CR1 - RELAPSE             | MDS           | 8                                        | 8                                                           |                                   | RELAPSE  | M5                 |      |     |           |          |      |                   |     |       |                 |        |            |                        |     |         |                |        |      |              |      |      |       |       |       |       |       |                                                          |       |       | 46,XX                                                        |                          |
| P19                       | 80            | 16                             | M      | 35          | CR1 - Relapse - CR2 - SCT |               | 44                                       | 135                                                         | +                                 | RELAPSE  | M2                 |      |     |           |          |      |                   |     |       |                 |        |            |                        |     |         |                |        |      |              |      |      |       |       |       |       |       |                                                          |       |       | 46,XX                                                        |                          |
| P20                       | 93            | 46                             | F      | 55          | CR1 - RELAPSE             |               | 12                                       | 12                                                          |                                   | RELAPSE  | M0                 |      |     |           |          |      |                   |     |       |                 |        |            |                        |     |         |                |        |      |              |      |      |       |       |       |       |       |                                                          |       |       | 46,XX                                                        |                          |
| P21                       | 99            | 114                            | F      | 48          | CR1 - RELAPSE             |               | 6                                        | 11                                                          |                                   | RELAPSE  | M0                 |      |     |           |          |      |                   |     |       |                 |        |            |                        |     |         |                |        |      |              |      |      |       |       |       |       |       |                                                          |       |       | 46,XX                                                        |                          |
| P22                       | 30            | 4                              | M      | 41          | CR1 - RELAPSE             |               | 26                                       | 42                                                          |                                   | RELAPSE  | M4                 |      |     |           |          |      |                   |     |       |                 |        |            |                        |     |         |                |        |      |              |      |      |       |       |       |       |       |                                                          |       |       | 46,XX                                                        |                          |
| P23                       | 97            | 170                            | M      | 46          | CR1 - RELAPSE             |               | 11                                       | 11                                                          |                                   | RELAPSE  | M4                 |      |     |           |          |      |                   |     |       |                 |        |            |                        |     |         |                |        |      |              |      |      |       |       |       |       |       |                                                          |       |       | 46,XX                                                        |                          |
| P24                       | 50            | 31                             | M      | 53          | CR1 - REL_FREE            |               | -                                        | 250                                                         | +                                 | REL_FREE | M4                 |      |     |           |          |      |                   |     |       |                 |        |            |                        |     |         |                |        |      |              |      |      |       |       |       |       |       |                                                          |       |       | 46,XX                                                        |                          |
| P26                       | 83            | 59                             | M      | 53          | CR1 - Relapse - CR2 - SCT |               | 53                                       | 109                                                         | +                                 | RELAPSE  | M0                 |      |     |           |          |      |                   |     |       |                 |        |            |                        |     |         |                |        |      |              |      |      |       |       |       |       |       |                                                          |       |       | Multiple (+13 is dominant)                                   |                          |
| P29                       | 83            | 71                             | M      | 58          | CR1 - REL_FREE            |               | -                                        | 114                                                         | +                                 | REL_FREE | M5                 |      |     |           |          |      |                   |     |       |                 |        |            |                        |     |         |                |        |      |              |      |      |       |       |       |       |       |                                                          |       |       | 46,XX                                                        |                          |
| P30                       | 92            | 10                             | M      | 67          | CR1 - RELAPSE             |               | 5                                        | 49                                                          |                                   | RELAPSE  | M0                 |      |     |           |          |      |                   |     |       |                 |        |            |                        |     |         |                |        |      |              |      |      |       |       |       |       |       |                                                          |       |       | 45-46,XY,-5,-del(1;5)(p17;5q13)                              |                          |
| P31                       | 86            | 38                             | F      | 36          | CR1 - REL_FREE            | Chemotherapy  | -                                        | 232                                                         | +                                 | REL_FREE | M5                 |      |     |           |          |      |                   |     |       |                 |        |            |                        |     |         |                |        |      |              |      |      |       |       |       |       |       |                                                          |       |       | 46,XX,t(9;11)(p21;q23)                                       |                          |
| P32                       | 95            | 47                             | M      | 62          | CR1 - RELAPSE             |               | 6                                        | 16                                                          |                                   | RELAPSE  | M1                 |      |     |           |          |      |                   |     |       |                 |        |            |                        |     |         |                |        |      |              |      |      |       |       |       |       |       |                                                          |       |       |                                                              | 46,XY                    |
| P34                       | 76            | 14                             | M      | 48          | CR1 - RELAPSE             |               | 6                                        | 7                                                           |                                   | RELAPSE  | M5                 |      |     |           |          |      |                   |     |       |                 |        |            |                        |     |         |                |        |      |              |      |      |       |       |       |       |       |                                                          |       |       | 46,XY,inv(16)(p13;q22)                                       |                          |
| P36                       | 32            | 33                             | M      | 36          | CR1 - REL_FREE            |               | -                                        | 70                                                          | +                                 | REL_FREE | M4                 |      |     |           |          |      |                   |     |       |                 |        |            |                        |     |         |                |        |      |              |      |      |       |       |       |       |       |                                                          |       |       | 46,XY                                                        |                          |
| P37                       | 47            | 65                             | F      | 57          | CR1 - RELAPSE             |               | 12                                       | 12                                                          |                                   | RELAPSE  | M4                 |      |     |           |          |      |                   |     |       |                 |        |            |                        |     |         |                |        |      |              |      |      |       |       |       |       |       |                                                          |       |       | 46,XY,inv(16)(p13;q22)(5)(46,del(X;6)(p22;p12)(13)(46,XX)(2) |                          |
| P40                       | 95            | 48                             | F      | 63          | CR1 - RELAPSE             |               | 4                                        | 6                                                           |                                   | RELAPSE  | M1                 |      |     |           |          |      |                   |     |       |                 |        |            |                        |     |         |                |        |      |              |      |      |       |       |       |       |       |                                                          |       |       |                                                              | 46,XX,del(11)(q23;q23.3) |
| P42                       | 90            | 351                            | M      | 43          | CR1 - REL_FREE            |               | -                                        | 253                                                         | +                                 | REL_FREE | M5                 |      |     |           |          |      |                   |     |       |                 |        |            |                        |     |         |                |        |      |              |      |      |       |       |       |       |       |                                                          |       |       |                                                              | 46,XY,inv(16)            |
| P43                       | 52            | 50                             | M      | 48          | CR1 - REL_FREE            |               | -                                        | 170                                                         | +                                 | REL_FREE | M4                 |      |     |           |          |      |                   |     |       |                 |        |            |                        |     |         |                |        |      |              |      |      |       |       |       |       |       |                                                          |       |       | 46,XY,inv(16)(p13;q22)                                       |                          |
| P44                       | 77            | 101                            | M      | 65          | CR1 - REL_FREE            |               | -                                        | 109                                                         | +                                 | REL_FREE | M5                 |      |     |           |          |      |                   |     |       |                 |        |            |                        |     |         |                |        |      |              |      |      |       |       |       |       |       |                                                          |       |       | Multiple                                                     |                          |
| P45                       | 95            | 24                             | F      | 61          | CR1 - Relapse - CR2 - SCT | MDS           | 12                                       | 97                                                          | death by toxicity/infection       | RELAPSE  | M5                 |      |     |           |          |      |                   |     |       |                 |        |            |                        |     |         |                |        |      |              |      |      |       |       |       |       |       |                                                          |       |       | 46,XX                                                        |                          |
| P46                       | 83            | 37                             | F      | 60          | CR1 - REL_FREE            |               | -                                        | 109                                                         | +                                 | REL_FREE | M5                 |      |     |           |          |      |                   |     |       |                 |        |            |                        |     |         |                |        |      |              |      |      |       |       |       |       |       |                                                          |       |       | 46,XX                                                        |                          |
| P47                       | 55            | 9                              | F      | 41          | CR1 - REL_FREE            |               | -                                        | 159                                                         | +                                 | REL_FREE | M4                 |      |     |           |          |      |                   |     |       |                 |        |            |                        |     |         |                |        |      |              |      |      |       |       |       |       |       |                                                          |       |       | 46,XX                                                        |                          |
| P48                       | 72            | 28                             | M      | 68          | CR1 - RELAPSE             |               | 3                                        | 23                                                          |                                   | RELAPSE  | M1                 |      |     |           |          |      |                   |     |       |                 |        |            |                        |     |         |                |        |      |              |      |      |       |       |       |       |       |                                                          |       |       | 46,XX                                                        |                          |
| P49                       | 80            | 29                             | M      | 54          | CR1 - REL_FREE            | Chemotherapy  | -                                        | 174                                                         | +                                 | REL_FREE | M5                 |      |     |           |          |      |                   |     |       |                 |        |            |                        |     |         |                |        |      |              |      |      |       |       |       |       |       |                                                          |       |       | 46,XX                                                        |                          |
| P50                       | 95            | 182                            | F      | 36          | CR1 - RELAPSE             |               | 4                                        | 12                                                          |                                   | RELAPSE  | M4                 |      |     |           |          |      |                   |     |       |                 |        |            |                        |     |         |                |        |      |              |      |      |       |       |       |       |       |                                                          |       |       | 46,XX                                                        |                          |
| P51                       | 95            | 112                            | F      | 32          | CR1 - Relapse - CR2 - SCT |               | 12                                       | 142                                                         | +                                 | RELAPSE  | M5                 |      |     |           |          |      |                   |     |       |                 |        |            |                        |     |         |                |        |      |              |      |      |       |       |       |       |       |                                                          |       |       | 46,XX,del(5)(q31;q34)(5)(46,XX)(15)                          |                          |
| P52                       | 25            | 33                             | M      | 62          | CR1 - RELAPSE             |               | 8                                        | 9                                                           |                                   | RELAPSE  | M4                 |      |     |           |          |      |                   |     |       |                 |        |            |                        |     |         |                |        |      |              |      |      |       |       |       |       |       |                                                          |       |       | 47,XY,+8(12)(46,XY)(13)                                      |                          |
| P53                       | 50            | 65                             | M      | 48          | CR1 - REL_FREE            |               | -                                        | 286                                                         | +                                 | REL_FREE | M4                 |      |     |           |          |      |                   |     |       |                 |        |            |                        |     |         |                |        |      |              |      |      |       |       |       |       |       |                                                          |       |       | 46,XX                                                        |                          |

Gene cell colors indicate: light yellow = wild type; red = mutated; grey = not determined; Other grey colored cells on the FAB classification and Cytogenetics columns indicate uncertain or not determined data; TF/TR: transcription factors/repressors; BM: bone marrow; WBC: white blood cells; CR: complete remission; NPM1 Ins: a 4 bp-insertion/duplication; SCT: stem-cell transplantation; ITD: internal tandem duplication; FAB: French-American-British; TKD: tyrosine kinase domain.

**Table S2.** Overview of the nine AML patients external to the study cohort used for cell proliferation and Western blot assays.

| Experimental patient code | BM blasts (%) | WBC count (10 <sup>9</sup> /L) | Gender | Age (years) | Clinical progression | Secondary AML | Time to relapse (months after diagnosis) | Survival time (months after diagnosis) (updated on 31/05/19) | Still alive (+) | Group    | FAB classification | NPM1 Ins | FLT3-ITD | CEBPA | Cytogenetics |
|---------------------------|---------------|--------------------------------|--------|-------------|----------------------|---------------|------------------------------------------|--------------------------------------------------------------|-----------------|----------|--------------------|----------|----------|-------|--------------|
| REL F EXT 1               | 48            | 28.2                           | F      | 33          | CR1 - REL FREE       |               | -                                        | 50                                                           | +               | REL FREE | M1                 |          |          |       | t(8;21)      |
| REL F EXT 2               | 94            | 72.4                           | M      | 32          | CR1 - REL FREE       |               | -                                        | 35                                                           | +               | REL FREE | M2                 |          |          |       | 46, XY       |
| REL F EXT 3               | 77            | 241                            | M      | 42          | CR1 - AlloSCT in CR1 |               | -                                        | 81                                                           | +               | REL FREE | M2                 |          |          |       | 46, XY       |
| REL F EXT 4               | 61            | 131                            | M      | 19          | CR1 - AlloSCT in CR1 |               | -                                        | 58                                                           | +               | REL FREE | M5                 |          |          |       | 46, XY       |
| REL F EXT 5               | 28            | 34.5                           | M      | 48          | CR1 - AlloSCT in CR1 |               | -                                        | 48                                                           | +               | REL FREE | M4                 |          |          |       | 46, XY       |
| REL EXT 1                 | 59            | 34.2                           | M      | 61          | CR1 - RELAPSE        |               | 10                                       | 17                                                           |                 | RELAPSE  | M4                 |          |          |       | 46, XY       |
| REL EXT 2                 | 90            | 59.8                           | M      | 42          | CR1 - RELAPSE        |               | 5                                        | 7                                                            |                 | RELAPSE  | M5                 |          |          |       | 46, XY       |
| REL EXT 3                 | 95            | 58.3                           | M      | 64          | CR1 - RELAPSE        |               | 7                                        | 8                                                            |                 | RELAPSE  | M2                 |          |          |       | 46, XY       |
| REL EXT 4                 | 70            | 96.9                           | F      | 46          | CR1 - RELAPSE        |               | 27                                       | 29                                                           |                 | RELAPSE  | M2                 |          |          |       | iso13        |

Cell coloring and abbreviations are the same as in Table S1.

**Table S3.** List of 14 transcription-related proteins and/or phosphoproteins with higher abundance/phosphorylation in the RELAPSE group subjected to ChIP analysis to determine binding sites of target genes.

| Transcription protein | Biological function                              | ENCODE accession ID         |
|-----------------------|--------------------------------------------------|-----------------------------|
| AFF1                  | DNA-binding transcription                        | ENCFF452EKB,<br>ENCFF267LVE |
| ATRX                  | Transcription regulation<br>Chromatin remodeling | N/A                         |
| BBX                   | DNA-binding transcription                        | N/A                         |
| BCL11A                | DNA-binding transcription                        | N/A                         |
| CEBPZ                 | DNA-binding transcription                        | ENCFF002EEI                 |
| ETV6                  | DNA-binding transcription                        | ENCFF696VXH                 |
| GATAD2B               | Transcription regulation                         | N/A                         |
| IKZF1                 | DNA-binding transcription                        | ENCFF015LUT,<br>ENCFF424OOE |
| IRF5                  | DNA-binding transcription                        | N/A                         |
| PARP1                 | Chromatin remodeling                             | N/A                         |
| PML                   | DNA-binding transcription                        | ENCFF000QDH                 |
| SATB1                 | Transcription regulation<br>Chromatin remodeling | N/A                         |
| SMARCC1               | Chromatin remodeling                             | N/A                         |
| TRIM28                | Transcription regulation<br>Chromatin remodeling | ENCFF000QJK                 |

ChIP data was retrieved from ENCODE and from experiments using K562, a human undifferentiated myeloid cell line. For some proteins, ChIP-seq data were not found or did not successfully pass the audit status of the computation pipeline (indicated as N/A).

**Table S4.** List of overlapping regulated proteins and phosphoproteins in the 26 RELAPSE and 15 REL\_FREE patient cohort.

|         | Proteome        | PHOSPHO-1       | PHOSPHO-2       | PHOSPHO-3       | PHOSPHO-4       | PHOSPHO-5       | PHOSPHO-6       |
|---------|-----------------|-----------------|-----------------|-----------------|-----------------|-----------------|-----------------|
| Gene    | FC<br>REL/REL_F |
| SATB1   | 1.42            | 1.00            | 1.93            |                 |                 |                 |                 |
| ZNF280C | 1.10            | 0.90            |                 |                 |                 |                 |                 |
| DDX54   | 1.10            | 1.04            |                 |                 |                 |                 |                 |
| RBM34   | 1.04            | 0.81            |                 |                 |                 |                 |                 |
| PARP1   | 0.97            | 0.87            |                 |                 |                 |                 |                 |
| NOC2L   | 0.97            | 0.72            | 0.72            |                 |                 |                 |                 |
| FLT3    | 0.95            | 0.91            | 0.75            |                 |                 |                 |                 |
| FTSJ3   | 0.90            | 0.92            | 0.92            |                 |                 |                 |                 |
| NPM1    | 0.85            | 1.21            |                 |                 |                 |                 |                 |
| PPAN    | 0.83            | 0.60            | 0.93            | 0.93            |                 |                 |                 |
| ETV6    | 0.78            | 0.89            | 0.65            | 0.90            |                 |                 |                 |
| SMARCC1 | 0.71            | 0.59            | 0.59            |                 |                 |                 |                 |
| PML     | 0.71            | 0.81            | 0.65            | 0.81            | 0.78            |                 |                 |
| UTP14A  | 0.70            | 0.74            | 0.74            |                 |                 |                 |                 |
| NOP58   | 0.69            | 0.69            |                 |                 |                 |                 |                 |
| CCDC86  | 0.69            | 1.01            | 0.59            | 0.86            | 0.59            | 0.86            | 0.63            |
| MTA1    | 0.68            | 1.03            |                 |                 |                 |                 |                 |
| H2AFY   | 0.66            | 1.01            | 0.92            |                 |                 |                 |                 |
| BCKDHA  | 0.66            | 0.97            |                 |                 |                 |                 |                 |
| NOP56   | 0.65            | 0.67            |                 |                 |                 |                 |                 |
| LIG3    | 0.65            | 0.96            |                 |                 |                 |                 |                 |
| ATRX    | 0.61            | 0.66            |                 |                 |                 |                 |                 |
| NDRG1   | -0.58           | -0.72           |                 |                 |                 |                 |                 |
| ANXA2   | -0.60           | -0.67           |                 |                 |                 |                 |                 |
| AAK1    | -0.62           | -0.74           | -0.82           |                 |                 |                 |                 |
| STX12   | -0.69           | -0.81           | -0.98           | -0.98           |                 |                 |                 |
| DBNL    | -0.69           | -0.75           | -1.21           |                 |                 |                 |                 |
| GMIP    | -0.73           | -1.00           | -0.95           |                 |                 |                 |                 |
| PGAM1   | -0.74           | -1.20           |                 |                 |                 |                 |                 |
| CCDC88B | -0.78           | -0.89           |                 |                 |                 |                 |                 |
| DMXL2   | -0.88           | -1.27           | -1.27           |                 |                 |                 |                 |
| IQGAP1  | -0.92           | -1.84           |                 |                 |                 |                 |                 |
| HOMER3  | -1.10           | -1.86           |                 |                 |                 |                 |                 |
| PRKCD   | -1.03           | -1.06           | -1.58           |                 |                 |                 |                 |

RELAPSE/REL\_FREE FCs of the proteins (Proteome) and of different phosphosites (PHOSPHO-1 TO PHOSPHO-6) in the phosphoproteins are shown. Positive and negative FCs are shown in purple and green, respectively.

**Table S5.** Cell proliferation assays using kinase inhibitors.

| Inhibitor(s) | C1 (nM)     | C2 (nM) | <i>P</i> value<br>RELAPSE | <i>P</i> value<br>REL_FREE |
|--------------|-------------|---------|---------------------------|----------------------------|
| CX           | 5000        |         | .169                      | .051                       |
| CX           | 15000       |         | .005                      | .008                       |
| AB           | 250         |         | .005                      | .008                       |
| AB           | 500         |         | .005                      | .008                       |
| SNS          | 200         |         | .013                      | .008                       |
| SNS          | <u>400</u>  |         | .005                      | .008                       |
| SCH          | 500         |         | .005                      | .008                       |
| SCH          | <u>1000</u> |         | .005                      | .008                       |
| CX+AB        | 1500        | 50      | .203                      | .008                       |
| CX+SNS       | 1500        | 50      | .017                      | .008                       |
| AB+SNS       | 50          | 50      | .059                      | .008                       |
| AB+SCH       | 50          | 125     | .007                      | .008                       |
| SNS+SCH      | 50          | 125     | .037                      | .086                       |

List of inhibitors tested in proliferation assays with primary cells from RELAPSE (P11, P17, P18, P22, P37 and P45 from the original cohort and four patient samples from an external cohort) and REL\_FREE patients (P14, P36, P46 and P47 from the original cohort and five patient samples from an external cohort). *P* values are calculated after Wilcoxon matched pairs (control and treatment) test for each patient group. Underlined concentrations (C) were used for the preparation of samples for Western blot analysis (Figure S13). CX: CX-4945, an inhibitor against CSK2; AB: Abemaciclib, an inhibitor against CDK4/6; SNS: SNS032, an inhibitor against CDK2/7/9; SCH: SCH772984, an inhibitor against ERK1/2.

Table S6. Densitometry intensities and normalized intensities of Western blot bands.

| peak CDK2     | area      | area_control band | area/area_control band | peak CDK2 T160        | area      | area_control band | area/area_control band |
|---------------|-----------|-------------------|------------------------|-----------------------|-----------|-------------------|------------------------|
| P18_control   | 6983,033  | 1092,527          | 6,392                  | P18_control           | 11982,012 | 1956,820          | 6,123                  |
| P18_SCH       | 5074,941  | 1389,770          | 3,652                  | P18_SCH               | 12095,941 | 1758,648          | 6,878                  |
| P18_SNS       | 10647,891 | 1590,648          | 6,694                  | P18_SNS               | 9367,305  | 1564,698          | 5,987                  |
| P37_control   | 2126,891  | 1471,234          | 1,446                  | P37_control           | 7206,648  | 1838,234          | 3,920                  |
| P37_SCH       | 2704,941  | 1795,062          | 1,507                  | P37_SCH               | 8175,184  | 1771,477          | 4,615                  |
| P37_SNS       | 4859,134  | 1718,355          | 2,828                  | P37_SNS               | 8415,598  | 1576,770          | 5,337                  |
| P17_control   | 4424,648  | 1196,234          | 3,699                  | P17_control           | 4615,497  | 1444,891          | 3,194                  |
| P17_SCH       | 4848,770  | 1338,648          | 3,622                  | P17_SCH               | 4657,184  | 1584,527          | 2,939                  |
| P17_SNS       | 5503,669  | 1419,770          | 3,876                  | P17_SNS               | 4653,669  | 1723,820          | 2,700                  |
| P14_control   | 644,234   | 1476,698          | 0,436                  | P14_control           | 51,364    | 1158,799          | 0,044                  |
| P14_SCH       | 736,527   | 1537,548          | 0,479                  | P14_SCH               | 54,657    | 883,577           | 0,062                  |
| P14_SNS       | 850,820   | 1408,355          | 0,604                  | P14_SNS               | 159,021   | 859,870           | 0,185                  |
| P44_control   | 547,870   | 1045,234          | 0,524                  | P44_control           | 177,899   | 773,527           | 0,230                  |
| P44_SCH       | 665,406   | 1482,648          | 0,449                  | P44_SCH               | 214,263   | 994,284           | 0,215                  |
| P44_SNS       | 746,284   | 1199,941          | 0,622                  | P44_SNS               | 106,192   | 819,527           | 0,130                  |
| EXT_2_control | 2123,941  | 1492,406          | 1,423                  | EXT_2_control         | 1454,113  | 999,477           | 1,455                  |
| EXT_2_SCH     | 2967,941  | 1498,406          | 1,981                  | EXT_2_SCH             | 3068,477  | 1038,648          | 2,954                  |
| EXT_2_SNS     | 2663,477  | 1712,062          | 1,556                  | EXT_2_SNS             | 3018,426  | 1167,234          | 2,586                  |
|               |           |                   |                        |                       |           |                   |                        |
| peak erk1/2   | area      | area_control band | area/area_control band | peak erk1/2 T202 Y204 | area      | area_control band | area/area_control band |
| P18_control   | 7328,770  | 1092,527          | 6,708                  | P18_control           | 4183,042  | 1956,820          | 2,138                  |
| P18_SCH       | 7743,477  | 1389,770          | 5,572                  | P18_SCH               | 292,263   | 1758,648          | 0,166                  |
| P18_SNS       | 6791,648  | 1590,648          | 4,270                  | P18_SNS               | 4054,648  | 1564,698          | 2,591                  |
| P37_control   | 4761,113  | 1471,234          | 3,236                  | P37_control           | 5297,527  | 1838,234          | 2,882                  |
| P37_SCH       | 5754,477  | 1795,062          | 3,206                  | P37_SCH               | 219,263   | 1771,477          | 0,124                  |
| P37_SNS       | 5361,527  | 1718,355          | 3,120                  | P37_SNS               | 13905,598 | 1576,770          | 8,819                  |
| P17_control   | 6244,355  | 1196,234          | 5,220                  | P17_control           | 1265,376  | 1444,891          | 0,876                  |
| P17_SCH       | 6941,113  | 1338,648          | 5,185                  | P17_SCH               | 70,607    | 1584,527          | 0,045                  |
| P17_SNS       | 7618,841  | 1419,770          | 5,366                  | P17_SNS               | 4495,477  | 1723,820          | 2,608                  |
| P14_control   | 12070,012 | 1476,698          | 8,174                  | P14_control           | 3169,497  | 1158,799          | 2,735                  |
| P14_SCH       | 12150,234 | 1537,548          | 7,902                  | P14_SCH               | 598,205   | 883,577           | 0,677                  |
| P14_SNS       | 9395,820  | 1408,355          | 6,671                  | P14_SNS               | 3913,527  | 859,870           | 4,551                  |
| P44_control   | 7708,820  | 1045,234          | 7,375                  | P44_control           | 4662,820  | 773,527           | 6,028                  |
| P44_SCH       | 8500,062  | 1482,648          | 5,733                  | P44_SCH               | 765,083   | 994,284           | 0,769                  |
| P44_SNS       | 7734,820  | 1199,941          | 6,446                  | P44_SNS               | 4451,527  | 819,527           | 5,432                  |
| EXT_2_control | 3771,355  | 1492,406          | 2,527                  | EXT_2_control         | 5932,527  | 999,477           | 5,936                  |
| EXT_2_SCH     | 4418,820  | 1498,406          | 2,949                  | EXT_2_SCH             | 1563,698  | 1038,648          | 1,506                  |
| EXT_2_SNS     | 5046,820  | 1712,062          | 2,948                  | EXT_2_SNS             | 8727,355  | 1167,234          | 7,477                  |

Data intensities obtained using ImageJ correspond to the 3 RELAPSE and 3 REL\_FREE patient samples shown in Figure S13. Normalized data were used for statistical analysis between the groups.

## Supplementary References

1. Mayer, R.J.; Davis, R.B.; Schiffer, C.A.; Berg, D.T.; Powell, B.L.; Schulman, P.; Omura, G.A.; Moore, J.O.; McIntyre, O.R.; Frei, E., 3rd. Intensive postremission chemotherapy in adults with acute myeloid leukemia. Cancer and Leukemia Group B. *N. Engl. J. Med.* **1994**, *331*, 896–903, doi:10.1056/NEJM199410063311402.
2. Kelstrup, C.D.; Jersie-Christensen, R.R.; Batth, T.S.; Arrey, T.N.; Kuehn, A.; Kellmann, M.; Olsen, J.V. Rapid and deep proteomes by faster sequencing on a benchtop quadrupole ultra-high-field Orbitrap mass spectrometer. *J. Proteome Res.* **2014**, *13*, 6187–6195, doi:10.1021/pr500985w.
3. Cox, J.; Hein, M.Y.; Lubner, C.A.; Paron, I.; Nagaraj, N.; Mann, M. Accurate proteome-wide label-free quantification by delayed normalization and maximal peptide ratio extraction, termed MaxLFQ. *Mol. Cell Proteomics* **2014**, *13*, 2513–2526, doi:10.1074/mcp.M113.031591.
4. Bantscheff, M.; Schirle, M.; Sweetman, G.; Rick, J.; Kuster, B. Quantitative mass spectrometry in proteomics: a critical review. *Anal. Bioanal. Chem.* **2007**, *389*, 1017–1031, doi:10.1007/s00216-007-1486-6.

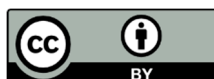

© 2020 by the authors. Licensee MDPI, Basel, Switzerland. This article is an open access article distributed under the terms and conditions of the Creative Commons Attribution (CC BY) license (<http://creativecommons.org/licenses/by/4.0/>).
