# Supplementary material for: Proteome and Phosphoproteome Changes Associated with Prognosis in Acute Myeloid Leukemia
Source: Cancers (Basel). 2020 Mar 17;12(3):709. doi: 10.3390/cancers12030709 (PMC7140113; doi:10.3390/cancers12030709)
Supplement: Supplementary file 1 [file cancers-12-00709-s001.zip]

Archive with 5 entries (5 files):
- cancers-724561-SI.pdf
- Supplementary file 1- Proteomics data RELAPSE vs REL_FREE cohort.xlsx
- Supplementary file 2 - Suppl information to Figure 2c.xlsx
- Supplementary file 3 - Phosphoproteomics data RELAPSE vs REL_FREE cohort.xlsx
- Supplementary file 4 - Kinase substrates.xlsx
