# Supplementary material for: Proteome and Phosphoproteome Changes Associated with Prognosis in Acute Myeloid Leukemia
Source: Cancers (Basel). 2020 Mar 17;12(3):709. doi: 10.3390/cancers12030709 (PMC7140113; doi:10.3390/cancers12030709)
Supplement: Supplementary file 1 [file cancers-12-00709-s001.zip › Supplementary file 1- Proteomics data RELAPSE vs REL_FREE cohort.xlsx]

## Sheet: Details
MS proteomic data from the 15 REL_FREE and 26 RELAPSE patients.
Datasheet "Main Data - 5309 proteins" contains the proteomics data after selecting 5 quantified valid values of each protein per group.
Datasheet "351 significant proteins" contains significantly different proteins after applying two variance t-test and Z-statistics
Datasheet "Main Data Label-free" contains the label-free proteomics data after selecting 5 quantified valid values of each protein per group.

## Sheet: Main Data - 5309 proteins
REL-FREE	REL-FREE	REL-FREE	REL-FREE	REL-FREE	REL-FREE	REL-FREE	REL-FREE	REL-FREE	REL-FREE	REL-FREE	REL-FREE	REL-FREE	REL-FREE	REL-FREE	RELAPSE	RELAPSE	RELAPSE	RELAPSE	RELAPSE	RELAPSE	RELAPSE	RELAPSE	RELAPSE	RELAPSE	RELAPSE	RELAPSE	RELAPSE	RELAPSE	RELAPSE	RELAPSE	RELAPSE	RELAPSE	RELAPSE	RELAPSE	RELAPSE	RELAPSE	RELAPSE	RELAPSE	RELAPSE	RELAPSE
P10	P13	P14	P24	P29	P3	P31	P36	P42	P43	P44	P46	P47	P49	P53	P11	P12	P15	P17	P18	P19	P2	P20	P21	P22	P23	P26	P30	P32	P34	P37	P4	P40	P45	P48	P5	P50	P51	P52	P6	P9	id	Protein IDs	Majority protein IDs	Protein names	Gene names	First gene name	REL_FREE median	RELAPSE median	FC RELAPSE - REL_FREE
-0.912517	-1.25082	-0.42386	-0.674463	-1.36277	-0.905072	-0.726787	-0.564703	-1.39788	-0.826166	-0.735327	-0.799594	-0.742101	-0.633775	-0.742159	-0.438937	-1.15694	-0.608441	-0.966408	-0.869014	-0.818275	-0.856371	-1.14196	-1.04333	-0.557146	-0.992844	-0.937843	-1.16676	-1.19272	-0.772389	-0.81297	-0.847462	-1.31722	-0.737986	-0.984789	-1.27579	-0.989474	-0.925789	-1.05475	-1.37004	-0.879142	3511	Q13155	Q13155	Aminoacyl tRNA synthase complex-interacting multifunctional protein 2	AIMP2	AIMP2	-0.742159	-0.952126	-0.209967
-1.38571	-1.22468	-2.18366	-2.08669	-0.976697	-1.23133	-1.99944	-1.89669	-0.759795	-1.69857	-1.96169	-2.07601	-1.71247	-2.39004	-1.54446	-1.41186	-1.02747	-1.07537	-1.14715	-0.592242	-1.21476	-0.934566	-0.522206	-0.703379	-1.7664	-1.46212	-0.965332	-0.74766	-0.555494	-1.84832	-1.30294	-1.43939	-0.643224	-1.4347	-0.356184	-1.15581	-1.49961	-1.02472	-1.38604	-0.58692	-1.03789	3661	Q13895	Q13895	Bystin	BYSL	BYSL	-1.71247	-1.05663	0.655844
0.548364	0.583344	-0.293718	-0.444814	0.511979	0.0266748	-0.252384	0.176496	0.621496	0.233405	-0.28981	-0.202253	-0.389644	-0.407086	0.0612576	0.00351312	0.26712	0.147426	-0.0356942	0.332606	0.292961	0.190464	-0.0166514	0.184612	-0.290953	0.099614	0.389491	0.712151	0.643476	-0.484847	0.193316	-0.961798	0.396754	0.49026	0.684918	0.53413	0.0728682	0.180353	0.405881	0.840871	-0.114171	3515	Q13185	Q13185	Chromobox protein homolog 3	CBX3	CBX3	0.0266748	0.19189	0.165215
-0.529931	-1.03821	-2.47738	-1.01189	-0.779685	-0.0472503	-0.61579	-1.06578	-0.583467	-1.46935	-0.75599	-0.370707	-0.552831	-1.43795	-0.633792	0.0163361	-0.593986	-0.867237	-0.699254	-1.1842	-0.642761	-1.84636	-0.0518812	-0.946719	-1.23558	-1.42234	-0.425168	-1.67493	-0.415914	-0.577566	-0.167111	-1.12995	-0.526914	-1.69596	-1.91375	-0.800396	-1.52669	-1.47321	-1.03795	-1.24113	-0.320864	7106	Q9H773	Q9H773	dCTP pyrophosphatase 1	DCTPP1	DCTPP1	-0.75599	-0.906978	-0.150989
-0.662455	-0.592629	-1.63387	-1.61673	-0.577839	-1.25073	-1.83159	-1.34655	-0.356203	-0.818603	-1.63851	-1.94596	-1.48067	-1.7886	-1.29229	-0.990573	-0.860881	-1.5224	-0.796208	-0.136331	-0.721769	-0.499454	-0.710075	-0.424272	-1.54488	-1.02975	-0.533836	-0.197098	-0.0678358	-1.68054	-0.827415	-1.69581	-0.361766	-0.650981	-0.247335	-0.338821	-0.977535	-0.680148	-0.825163	-0.0591782	-0.943376	7515	Q9NVP1	Q9NVP1	ATP-dependent RNA helicase DDX18	DDX18	DDX18	-1.34655	-0.715922	0.630626
0.0728005	-0.0649892	-0.328948	-0.730333	0.417203	-0.313906	-1.16149	-2.46268	0.272281	-0.360424	-0.731682	-0.392453	-0.167787	-0.313179	-0.572839	-0.893161	0.0012098	-0.0760248	0.165283	0.0718252	-0.634376	0.215951	0.0922505	0.688415	-0.368105	-0.0791326	0.210517	0.401304	0.75031	-1.05662	-0.545044	-0.376968	0.355204	-0.482713	-0.675296	-0.0827782	0.031701	-0.451809	-0.396606	0.447451	-0.128061	7350	Q9NQT4	Q9NQT4	Exosome complex component RRP46	EXOSC5	EXOSC5	-0.328948	-0.0775787	0.25137
-0.124062	-0.72031	-0.584038	-0.658138	-0.906605	-0.212012	-0.778362	-0.704785	-0.710819	-0.809596	-1.00068	-0.645417	-0.220423	-0.607546	-0.348302	-0.993934	-0.863515	-0.284841	-0.248465	-0.233022	-0.745163	-0.432068	-0.314287	-0.928529	-0.44109	-0.932281	-0.70174	-0.353701	-0.16023	-0.513599	-0.332672	-1.37584	-0.263894	-0.187027	-0.323532	-0.566518	-0.864073	-0.405015	-0.162339	-0.382436	-0.00346367	8154	Q9Y285;Q9Y285-2	Q9Y285;Q9Y285-2	Phenylalanine--tRNA ligase alpha subunit	FARSA	FARSA	-0.658138	-0.393726	0.264412
-1.13917	-1.19612	-2.39403	-2.38157	-0.703359	-1.13675	-2.79185	-1.84419	-0.753932	-1.52597	-2.58057	-2.48929	-2.02705	-2.31634	-1.84232	-1.15122	-0.611594	-1.22982	-1.04654	-0.612957	-0.716444	-0.989695	-0.699439	-0.783423	-2.26613	-1.95754	-0.632189	-0.369614	-0.343589	-2.82192	-0.848332	-1.86984	-0.325845	-0.919128	-0.0414621	-0.499224	-1.91695	-1.44096	-1.1106	-0.229605	-1.08651	6737	Q9BVP2-2;Q9BVP2	Q9BVP2-2;Q9BVP2	Guanine nucleotide-binding protein-like 3	GNL3	GNL3	-1.84419	-0.88373	0.960459
-1.74693	-1.88772	-2.46124	-2.27426	-1.68578	-2.08934	-2.28032	-2.45709	-1.52402	-2.21512	-2.34156	-2.2107	-2.07475	-2.48641	-2.1073	-1.97526	-1.78405	-1.38698	-1.57769	-1.17202	-2.22751	-1.5839	-1.29508	-1.53132	-1.78216	-2.10222	-1.39513	-1.10506	-0.885317	-2.29498	-1.91246	-2.19909	-1.16701	-2.23837	-1.60983	-1.67286	-2.0726	-1.69264	-2.04501	-1.0976	-1.50096	6560	Q9BQ67	Q9BQ67	Glutamate-rich WD repeat-containing protein 1	GRWD1	GRWD1	-2.2107	-1.64134	0.569354
-2.77976	-2.79721	-1.86474	-1.97669	-1.25165	-3.45501	-4.40233	-1.45906	-1.36836	-0.329338	-2.56605	-2.14411	-2.13773	-2.18581	-2.82943	-1.38411	-1.56071	-3.54998	-3.12263	-1.5622	-1.34223	-1.24028	-1.89495	-3.27282	-1.42239	-2.13813	-2.13973	-2.14719	-0.785239	-3.11789	-1.45816	-2.016	-3.29407	-0.917025	-1.49209	-1.48026	-2.1368	-2.19551	-1.89479	-1.62223	-4.06777	2741	P52789	P52789	Hexokinase-2	HK2	HK2	-2.14411	-1.89487	0.249236
-0.803267	-0.729336	-1.04515	-1.17354	-0.66853	-0.848254	-1.28082	-1.05177	-0.282153	-0.270404	-1.25543	-1.26994	-1.15832	-1.22407	-0.925757	-1.41776	-0.49818	-1.48322	-0.688689	0.347561	-0.906974	-0.276763	-0.499923	-0.886708	-1.33988	-0.488647	-0.800528	0.1254	0.038375	-1.14018	-0.7743	-1.23839	-0.00352968	-0.615499	-0.157029	-0.366453	-0.419533	-0.168686	-1.01765	-0.239128	-0.474091	1564	P10809;P10809-2	P10809	60 kDa heat shock protein, mitochondrial	HSPD1	HSPD1	-1.04515	-0.499051	0.546098
-1.09923	-0.901232	-1.33777	-1.43706	-0.988451	-0.92259	-1.62773	-1.24594	-0.411521	-0.661378	-1.57022	-1.66654	-1.4914	-1.49285	-1.19194	-1.67973	-0.747587	-1.40635	-1.08796	0.242207	-1.26654	-0.520856	-0.735284	-1.05745	-1.5815	-0.69648	-1.05258	-0.201945	-0.214211	-1.29283	-0.90598	-1.63014	-0.30587	-0.632457	-0.193886	-0.642942	-0.662607	-0.469087	-1.11492	-0.304624	-0.655249	2972	P61604	P61604	10 kDa heat shock protein, mitochondrial	HSPE1	HSPE1	-1.24594	-0.715882	0.530059
-0.416478	-0.58377	-2.00579	-1.48456	0.103257	NaN	-1.87648	NaN	0.0796509	-0.561835	NaN	-1.74044	-1.19186	-1.855	-1.00517	-0.739023	-0.130249	-0.716527	-0.573033	0.176894	-0.574306	-0.379887	-0.115712	-0.507603	-1.49057	-1.0122	-0.241595	0.126761	0.0250033	-1.66116	-0.228094	-1.42058	0.0408168	-0.726449	0.667644	0.0179613	-0.955522	-0.746921	-0.603267	0.128795	-0.415928	6145	Q96G21	Q96G21	U3 small nucleolar ribonucleoprotein protein IMP4	IMP4	IMP4	-1.09851	-0.461765	0.636747
-1.93185	-2.57939	-2.87773	-2.49526	-2.598	0.0662618	-1.58551	-2.07484	-1.948	-3.44946	-2.55572	-1.88363	-2.30442	-2.44777	-2.28876	-1.60172	-1.96192	-2.32984	-1.661	-1.98747	-2.63704	-2.33132	-1.61297	-2.09986	-2.06931	-2.94947	-2.31596	-1.90814	-2.05638	-1.93272	-1.65971	-1.88704	-1.94281	-2.40566	-2.66403	-2.19782	-2.87672	-3.1252	-2.22061	-2.21347	-1.71573	5642	Q8TEX9;Q8TEX9-2	Q8TEX9;Q8TEX9-2	Importin-4	IPO4	IPO4	-2.30442	-2.08459	0.219829
0.589196	0.00691953	-0.536522	-0.631294	0.703735	-0.283869	-1.11387	-0.382367	0.848064	-0.159428	-0.892814	-0.64989	-0.366686	-0.827262	0.0215746	-0.328404	0.23946	-0.140397	-0.432778	0.60689	0.195422	0.295219	0.760939	0.0746754	-0.764342	0.00640094	0.49118	1.10652	0.774064	-0.715187	0.50626	-0.756413	0.426923	0.273207	1.04304	0.835452	-0.000824987	0.153369	0.0638	0.752309	0.298059	8334	Q9Y4W2-2;Q9Y4W2;Q9Y4W2-3;Q9Y4W2-4	Q9Y4W2-2;Q9Y4W2;Q9Y4W2-3	Ribosomal biogenesis protein LAS1L	LAS1L	LAS1L	-0.366686	0.256333	0.623019
-0.16517	-0.72038	-2.69741	-2.65718	-0.805425	-0.527421	-0.596274	-2.27956	0.0230889	-2.01402	-1.61911	-1.89708	-1.81967	-2.54243	-1.18043	-1.01164	-0.443284	-1.00957	-0.847846	-0.826595	-0.94857	-1.67351	-1.27019	-0.510669	-2.95351	-0.304603	-0.0800791	-1.34772	-0.111606	-1.52971	-0.446476	-2.605	-0.482696	-1.32669	-1.67792	-0.19174	-1.36267	-0.76487	-0.527799	-0.930471	-1.9915	2248	P33991	P33991	DNA replication licensing factor MCM4	MCM4	MCM4	-1.61911	-0.93952	0.679592
-0.0329242	-0.586108	-2.59169	-2.35787	-0.607556	-0.32296	-0.270322	-1.785	0.251391	-1.74613	-1.40331	-1.66699	-1.62322	-2.28824	-0.992944	-0.706373	-0.310265	-0.67655	-0.570464	-0.597412	-0.837966	-1.42346	-1.0609	-0.28481	-2.68349	-0.162951	0.0979876	-1.14888	0.0720524	-1.20849	-0.16732	-2.42136	-0.299301	-1.05116	-1.38351	0.0405141	-1.17175	-0.542533	-0.416938	-0.730123	-1.69187	2249	P33992	P33992	DNA replication licensing factor MCM5	MCM5	MCM5	-1.40331	-0.691462	0.711853
-0.265739	-0.450333	-1.78539	-1.42522	0.132719	-0.563021	-1.58631	-1.11615	0.0739974	-0.771755	-1.23068	-1.61088	-1.07286	-1.68444	-0.991541	-0.76879	-0.242434	-0.548133	-0.49816	0.0339828	-0.303244	-0.330429	0.000438426	-0.33094	-0.972861	-0.753522	-0.179442	0.257455	0.151528	-1.48746	-0.281496	-1.1837	-0.00106437	-0.568981	0.766946	0.0520378	-0.790548	-0.710876	-0.474012	0.293736	-0.367957	312	O00566	O00566	U3 small nucleolar ribonucleoprotein protein MPP10	MPHOSPH10	MPHOSPH10	-1.07286	-0.330685	0.742172
-0.978856	-0.992543	-1.4172	-1.65274	-0.99434	-1.0629	-1.51561	-1.59493	-0.74608	-1.14232	-1.77214	-1.95948	-1.59831	-1.11018	-1.32388	-1.15868	-0.769958	-0.920596	-1.18281	-0.565002	-1.16789	-1.05452	-0.729848	-0.725999	-1.38575	-1.27751	-0.487086	-0.675191	-0.710987	-1.80559	-0.943968	-1.42561	-0.827803	-1.2563	-0.52584	-0.652957	-1.34101	-1.12103	-1.32206	-0.573182	-1.07502	7957	Q9UKD2	Q9UKD2	mRNA turnover protein 4 homolog	MRTO4	MRTO4	-1.32388	-0.999246	0.324639
-0.478785	-0.550401	-1.54891	-1.43957	-0.0503302	-1.122	-1.12346	-1.2125	0.00791207	-0.907624	-1.41831	-1.69289	-1.21889	-1.61149	-0.65307	-0.709665	-0.443966	-0.625499	-0.431162	0.252954	-0.370621	-0.21599	-0.0742779	-0.386657	-1.36814	-0.999733	-0.0823749	0.137182	-0.134721	-1.44458	-0.324909	-0.766467	0.202492	-0.49116	0.362699	0.1461	-0.506958	-0.409501	-0.792742	-0.0851622	-0.356385	6577	Q9BQG0;Q9BQG0-2	Q9BQG0;Q9BQG0-2	Myb-binding protein 1A	MYBBP1A	MYBBP1A	-1.12346	-0.378639	0.74482
-1.24242	-1.00042	-0.95633	-0.978238	-0.890318	-1.32978	-0.844614	-1.41877	-0.838145	-0.679425	-1.52644	-1.31258	-1.40724	-1.13574	-0.999765	-1.27443	-1.015	-0.965007	-1.76728	-0.332635	-1.12728	-0.430895	-1.48862	-1.0357	-1.20063	-0.549012	-1.4812	-0.708775	-0.532626	-1.11629	-1.73667	-0.647463	-0.942195	-0.774569	-0.630539	-1.19048	-0.231	-0.76941	-1.44831	-0.378935	-1.28724	7686	Q9P032	Q9P032	NADH dehydrogenase [ubiquinone] 1 alpha subcomplex assembly factor 4	NDUFAF4	NDUFAF4	-1.00042	-0.990003	0.010419
-0.273983	-0.52365	-1.6419	-1.44954	-0.334459	-0.996698	-1.65074	-2.71012	-0.315029	-0.625349	-1.36929	-1.52852	-1.28348	-1.53254	-1.3438	-0.974236	-0.388807	-0.630842	-0.442442	0.00844455	-1.17465	-0.297353	-0.0976101	-0.341323	-0.989766	-0.949035	0.0469154	0.196909	-0.0045486	-1.67133	-1.17434	-0.793252	0.0346484	-1.38129	-0.278543	-0.335544	-0.591698	-0.307215	-1.34718	-0.422786	-0.2553	8130	Q9Y221;Q9Y221-2	Q9Y221;Q9Y221-2	60S ribosome subunit biogenesis protein NIP7 homolog	NIP7	NIP7	-1.3438	-0.405797	0.938002
-1.48932	-1.15787	-2.34337	-2.14951	-0.815844	-1.71675	-2.0388	-1.93225	-0.410036	-1.33191	-2.13082	-2.55044	-1.9538	-2.40735	-1.73011	-1.52274	-0.859435	-1.33242	-1.28221	-0.391428	-1.25555	-0.710887	-0.719993	-0.850452	-1.95306	-1.5568	-0.833589	-0.515484	-0.55237	-2.31121	-1.13406	-2.07231	-0.450409	-1.09557	-0.251793	-0.641552	-1.28704	-1.23617	-1.39301	-0.310971	-1.49952	6727	Q9BVI4	Q9BVI4	Nucleolar complex protein 4 homolog	NOC4L	NOC4L	-1.93225	-1.11481	0.817434
-0.832249	-0.922061	-2.13059	-1.66911	-0.873185	-1.53784	-2.00629	-2.01516	-0.628826	-1.18808	-1.80879	-2.15461	-1.48878	-2.0295	-1.28341	-1.62298	-1.11666	-1.43026	-0.667488	0.159899	-0.985069	-0.40648	-0.486471	-1.15642	-2.08833	-1.29646	-0.826406	-0.227312	-0.429455	-1.8375	-1.12477	-1.80208	-0.511208	-1.00757	-0.422223	-0.811519	-1.19815	-0.913168	-1.23858	-0.269561	-0.903963	3824	Q14978-3	Q14978-3	Nucleolar and coiled-body phosphoprotein 1	NOLC1	NOLC1	-1.53784	-0.949118	0.58872
-1.32867	-0.92777	-2.13636	-1.79783	-0.53433	-1.01318	-2.65083	-1.41839	-0.347941	-1.24052	-2.14659	-2.26361	-1.85626	-1.97792	-1.16602	-0.564353	-0.704051	-1.42868	-1.30932	-0.118084	-0.798867	-0.672129	-0.499426	-0.861349	-1.5495	-1.62451	-0.527182	-0.6228	-0.405741	-2.00339	-0.749733	-1.14357	-0.464788	-0.946677	-0.0920671	-0.466155	-1.21037	-1.03057	-1.21911	-0.36172	-0.931559	8257	Q9Y3C1;Q9Y3C1-3;Q9Y3C1-2	Q9Y3C1;Q9Y3C1-3;Q9Y3C1-2	Nucleolar protein 16	NOP16	NOP16	-1.41839	-0.7743	0.644091
-0.694945	-0.804951	-2.01874	-1.79907	-0.640744	-1.39309	-1.73943	-1.48761	-0.379636	-0.974559	-1.70169	-1.83379	-1.58138	-1.8193	-1.22595	-1.18397	-0.746206	-1.01535	-0.890465	0.0173144	-0.896882	-0.360504	-0.441533	-0.603554	-1.62134	-0.871358	-0.440907	-0.12278	-0.27472	-1.67737	-0.907457	-1.28571	-0.180054	-0.79977	-0.128191	-0.360786	-0.872828	-0.614713	-1.27462	-0.25189	-0.641513	2472	P46087;P46087-4;P46087-2;P46087-3	P46087;P46087-4;P46087-2;P46087-3	Probable 28S rRNA (cytosine(4447)-C(5))-methyltransferase	NOP2	NOP2	-1.48761	-0.693859	0.793752
1.26945	0.830865	-0.172992	-0.168438	0.9788	0.0466733	-0.752814	-0.452844	0.764397	-0.0430509	-0.529649	-0.389081	0.0109332	-0.348022	0.427822	-0.0344136	0.560439	0.68114	0.335255	0.995209	0.544964	0.779338	0.915981	0.72203	-0.225722	0.0250129	0.750559	1.09115	0.598365	-0.314757	0.457873	-0.315651	0.751414	0.615664	1.32746	0.739134	0.366239	0.500556	0.492871	1.16375	0.827508	313	O00567	O00567	Nucleolar protein 56	NOP56	NOP56	-0.0430509	0.607014	0.650065
-0.637996	-0.887833	-1.89769	-1.64724	0.0809683	-0.574508	-1.1107	-0.793815	0.296684	-0.493814	-1.95059	-1.96991	-1.44003	-1.75284	-1.08164	-0.247635	-0.0828736	-0.4994	-0.30801	-0.27171	-0.131029	-0.624262	0.208787	-0.332579	-1.17046	-1.55384	0.199444	-0.157012	0.364242	-1.97739	-0.109958	-1.00527	0.200957	-0.128674	0.61244	0.326983	-1.40227	-1.07459	-0.214797	-0.181456	-0.938336	1365	P06748;P06748-2;P06748-3	P06748;P06748-2;P06748-3	Nucleophosmin	NPM1	NPM1	-1.08164	-0.231216	0.850428
-0.274351	-0.839987	-0.824749	-1.11263	-1.03634	-0.706132	-0.870318	-0.581192	-0.831528	-0.571624	-1.13749	-0.891652	-0.799744	-1.05964	-0.971853	-0.559057	-0.955337	-0.567912	-0.84819	-0.596337	-0.86452	-0.603254	-1.14041	-1.05826	-0.649393	-1.03622	-0.67271	-0.338561	-0.527196	-1.16415	-0.785784	-1.17325	-0.766579	-0.100788	-0.609063	-1.04161	-0.929508	-0.722596	-0.352237	-0.489401	-0.844162	8117	Q9UQ80;Q9UQ80-2	Q9UQ80;Q9UQ80-2	Proliferation-associated protein 2G4	PA2G4	PA2G4	-0.839987	-0.744587	0.0953996
-1.16548	-0.856292	-2.03589	-1.70259	-0.643979	-1.30106	-1.9431	-1.41801	-0.418252	-1.10564	-1.74962	-1.85906	-1.64333	-2.01396	-1.39766	-1.17531	-0.743163	-1.09854	-1.05092	-0.153091	-0.994174	-0.629152	-0.520617	-0.582563	-1.97608	-1.22493	-0.634189	-0.364413	-0.456312	-1.90938	-0.804919	-1.39996	-0.608783	-1.00061	-0.181602	-0.539045	-0.99416	-0.952959	-1.16326	-0.346279	-0.93346	308	O00541;O00541-2	O00541;O00541-2	Pescadillo homolog	PES1	PES1	-1.41801	-0.869189	0.548819
-0.0121305	-0.0186922	0.0343203	-0.290755	0.361375	0.0434801	-0.302707	-0.319962	0.534878	0.133876	-0.549763	-0.432539	-0.266961	-0.306843	-0.189458	0.0744823	0.318784	-0.172102	0.390628	0.601872	0.219824	0.279487	0.361519	-0.0497429	-0.231702	0.0410281	-0.096605	0.703352	0.545708	-0.373723	0.115361	-0.146357	0.577467	0.368595	0.244445	0.403159	0.20905	0.0752942	0.0838742	0.369033	0.10784	2265	P35232;P35232-2	P35232	Prohibitin	PHB	PHB	-0.189458	0.214437	0.403895
-1.10078	-1.1552	-2.87104	-2.39099	-0.780706	-1.46957	-1.72303	-1.54704	-0.198483	-0.876324	-2.17867	-2.13551	-1.69068	-2.15036	-1.29568	-1.39626	-0.630189	-1.08999	-1.23498	-0.0195507	-0.981589	-0.411145	-0.500666	-0.797598	-1.74541	-1.31978	-0.559466	-0.172494	-0.252582	-1.78928	-0.462247	-1.79981	-0.599281	-0.575845	-0.19998	-0.187546	-1.32351	-1.21141	-1.4996	-0.0749563	-1.1589	7323	Q9NQ55-2;Q9NQ55;Q9NQ55-3	Q9NQ55-2;Q9NQ55;Q9NQ55-3	Suppressor of SWI4 1 homolog	PPAN	PPAN	-1.54704	-0.713894	0.83315
-0.12148	-1.2617	-2.11316	NaN	-1.61206	-0.375698	-2.0416	-0.819781	-1.51171	-1.96906	-1.36953	-1.29418	-0.715924	-1.81734	-1.57015	-0.87876	-1.51759	-1.29649	-1.15214	-0.474177	-0.782543	-0.205456	-0.515592	-1.51452	-0.898156	-1.42569	-0.992289	-1.41645	-1.16558	-1.54557	-1.00985	-1.25906	-1.17852	-1.1275	NaN	-1.46285	-2.44814	-1.47444	-0.707443	-0.26925	-0.167347	711	O60678;O60678-2	O60678;O60678-2	Protein arginine N-methyltransferase 3	PRMT3	PRMT3	-1.44062	-1.15214	0.288482
-0.797419	-0.916028	-1.14413	-1.10779	-0.977057	-1.18779	-1.64744	-1.39344	-0.725172	-1.55717	-1.20129	-1.13895	-1.01936	-1.2145	-1.06476	-1.21977	-0.806809	-0.800766	-0.798338	-0.129929	-1.04626	-0.788807	-0.49831	-0.674521	-1.18974	-1.20754	-0.793011	-0.151029	-0.471297	-1.19944	-0.975912	-1.90641	-0.303997	-0.82427	-0.4157	-0.5989	-1.09675	-0.708651	-1.33871	-0.508051	-0.409822	8397	Q9Y606;Q9Y606-2	Q9Y606;Q9Y606-2	tRNA pseudouridine synthase A, mitochondrial	PUS1	PUS1	-1.13895	-0.795674	0.343273
-0.868252	-1.16403	NaN	-0.743771	-1.39231	-0.528467	-1.64102	-1.84798	-0.651726	NaN	NaN	-0.960423	-0.842948	-1.41209	NaN	-1.27166	-0.548733	-0.421477	-0.917888	-1.28141	-1.43282	NaN	-0.175695	-0.843902	-0.380387	NaN	-1.10928	NaN	-1.04521	-1.17174	-0.72557	-0.689473	-1.3	NaN	NaN	-1.97511	NaN	-2.27176	NaN	NaN	-0.581659	4909	Q7Z6M1;Q7Z6M1-2	Q7Z6M1;Q7Z6M1-2	Rab9 effector protein with kelch motifs	RABEPK	RABEPK	-0.960423	-0.98155	-0.0211268
-0.658675	-0.669649	-1.96005	-1.77264	-0.14098	-0.966146	-1.67704	-1.16181	0.169234	-0.809674	-1.65391	-2.02377	-1.15789	-1.94377	-0.975846	-0.820316	-0.257139	-0.607266	-0.554282	-0.185023	-0.463999	-0.486578	-0.101617	-0.419355	-1.25454	-1.08552	-0.262384	-0.101061	0.154849	-1.74115	-0.46752	-1.08299	-0.104192	-0.682806	0.366553	-0.0417647	-0.934553	-0.60745	-0.665216	0.130197	-0.535058	8195	Q9Y2P8;Q9Y2P8-2	Q9Y2P8	RNA 3-terminal phosphate cyclase-like protein	RCL1	RCL1	-1.15789	-0.477049	0.680836
-1.31239	-1.16658	-1.35383	-1.33372	-0.596565	-1.29456	-1.51156	-1.01157	-0.194314	-0.412404	-1.51093	-1.3561	-1.22526	-1.18483	-1.02701	-0.752172	-0.579163	-0.724517	-0.772968	-0.178412	-0.648561	-0.395062	-0.505246	-0.488431	-0.94564	-1.17798	-0.765755	-0.371342	-0.481644	-1.51144	-0.636989	-0.485359	-0.241098	-0.53603	-0.182084	-0.208543	-0.791355	-0.902051	-0.975024	-0.309636	-1.08619	4287	Q5JTH9;Q5JTH9-2;Q5JTH9-3	Q5JTH9;Q5JTH9-2;Q5JTH9-3	RRP12-like protein	RRP12	RRP12	-1.22526	-0.608076	0.617186
-0.300976	-0.341827	-1.32761	-1.24375	-0.421158	-0.984524	-1.35244	-1.02388	-0.019528	-0.470492	-1.52122	-1.55996	-0.976635	-1.26644	-0.733044	-0.939138	-0.225327	-1.08802	-0.538358	0.538375	-0.452094	-0.324291	-0.112986	-0.503504	-1.3385	-0.430421	-0.216452	0.0515021	-0.0220397	-1.31615	-0.490335	-0.993232	-0.254312	-0.48656	0.5144	0.0606611	-0.417797	-0.203822	-0.548174	-0.00296202	-0.276728	622	O43818	O43818	U3 small nucleolar RNA-interacting protein 2	RRP9	RRP9	-0.984524	-0.371044	0.613481
0.0489678	0.141831	-2.50239	-0.869055	-0.960309	-0.573363	-2.46743	-1.88389	-1.34309	-2.21062	-1.12508	-0.528133	-0.487448	-1.36731	-1.32198	-0.607967	-1.01423	0.328715	-1.24017	-1.54981	-0.136071	-1.95159	-0.386721	-1.85448	-1.16182	-2.4987	-0.908086	-1.93636	-1.48085	-0.766682	-0.848332	-1.2135	-0.701221	-2.50538	-1.5276	-1.37158	-2.16511	-2.03088	-0.348796	-0.90229	0.424759	3212	Q00796;Q00796-2	Q00796	Sorbitol dehydrogenase	SORD	SORD	-1.12508	-1.18766	-0.0625802
-1.29783	-1.70215	-2.47243	-1.1167	-1.46578	-0.908195	-1.26304	-1.43972	-1.57982	-2.50343	-1.08473	-1.0554	-0.970403	-1.16776	-1.75602	-0.707164	-1.04119	-1.06829	-1.74336	-2.19499	-1.8143	-2.49077	-0.621247	-1.02851	-0.882462	-2.56906	-1.3176	-1.93638	-1.73301	-0.931457	-1.0003	-1.11675	-1.28901	-2.56892	-2.47245	-1.39798	-2.20601	-2.39147	-1.57733	-2.36685	-0.835121	1852	P19623	P19623	Spermidine synthase	SRM	SRM	-1.29783	-1.48766	-0.189824
-0.40944	-0.51971	-0.937922	-1.17743	-0.259007	-0.562253	-2.19386	-0.990061	0.251893	-0.66103	-1.36581	-1.36006	-0.683892	-0.757882	-0.366236	-0.58693	0.162176	-0.337626	0.010784	0.672969	-0.404089	0.0207558	0.187142	-0.321183	-1.03164	-0.829629	-0.403474	0.490347	0.271688	-0.952859	-0.242806	-1.40229	0.560629	-0.80717	0.544528	0.25154	-0.627433	-0.0842267	-0.775326	0.0397749	0.188534	5184	Q8IYB8	Q8IYB8	ATP-dependent RNA helicase SUPV3L1, mitochondrial	SUPV3L1	SUPV3L1	-0.683892	-0.163517	0.520375
-1.79053	-1.51436	-1.50064	-1.94767	-0.697769	-1.2715	-2.25941	-1.87798	-1.04499	-0.586038	-2.15847	-2.14303	-1.73404	-2.12917	-1.9991	-1.80299	-1.38154	-1.94872	-1.14926	-0.254839	-1.24542	-0.695391	-1.11627	-1.36788	-1.79456	-1.56782	-1.72278	-0.612289	-0.381473	-1.53777	-1.18056	-1.10959	-0.769044	-0.898505	-0.620611	-1.09743	-1.20357	-1.03844	-1.61401	-0.934175	-1.27232	5946	Q969Z0;Q969Z0-2	Q969Z0;Q969Z0-2	Protein TBRG4	TBRG4	TBRG4	-1.79053	-1.16491	0.625623
0.684038	0.879684	-0.389505	-0.00586639	0.681657	-0.131793	-0.0681832	-0.222573	0.574322	0.239593	-0.198975	-0.447131	-0.155779	-0.337125	0.264213	0.0517401	0.512703	0.291734	0.0805265	0.772279	0.0028789	0.525561	0.485433	0.483383	-0.19586	0.242531	0.528395	0.0330419	0.837833	-0.119546	0.104697	-0.371174	1.05034	-0.0153189	0.520268	0.545065	0.277417	0.566193	-0.232904	0.971177	0.775246	3569	Q13428-3;Q13428;Q13428-4;Q13428-8;Q13428-2	Q13428-3;Q13428;Q13428-4;Q13428-8;Q13428-2	Treacle protein	TCOF1	TCOF1	-0.0681832	0.387559	0.455742
-1.6403	-1.37918	-2.06185	-2.25014	-1.43076	-2.20858	-2.33157	-1.93763	-1.28324	-1.43117	-2.19783	-2.16973	-1.89669	-2.33467	-1.89674	-2.28933	-1.74225	-2.1968	-1.39585	-0.252889	-2.06248	-0.783435	-1.49991	-1.76943	-1.95179	-1.681	-2.12528	-0.546539	-1.06224	-2.27478	-1.5733	-1.8189	-1.37513	-1.75418	-1.13289	-1.25134	-1.27494	-1.57087	-2.33851	-0.0530249	-1.64963	7078	Q9H5Q4	Q9H5Q4	Dimethyladenosine transferase 2, mitochondrial	TFB2M	TFB2M	-1.93763	-1.61147	0.326166
-0.757241	-0.566251	-1.7988	-1.49687	-0.0189272	-1.37042	-1.56183	-1.11817	0.347278	-0.694777	-1.59132	-1.90697	-0.897741	-1.72409	-1.04642	-0.696989	-0.14194	-0.770294	-0.560692	0.00366481	-0.362751	-0.324363	0.185581	-0.133373	-1.45083	-0.93136	-0.0494706	-0.224856	0.176024	-1.48403	-0.0584663	-1.21221	0.269718	-0.712965	0.673213	0.124137	-0.851486	-0.401093	-0.894104	0.0683578	-0.626989	879	O75691	O75691	Small subunit processome component 20 homolog	UTP20	UTP20	-1.11817	-0.343557	0.774613
-0.275087	-0.525125	-1.80313	-1.66454	-0.172502	-1.15487	-1.67915	-1.28197	0.01944	-0.694014	-1.58417	-1.50407	-1.24757	-1.70174	-1.08602	-0.924062	-0.485204	-0.893664	-0.561644	0.0705374	-0.66412	-0.324363	-0.128194	-0.514237	-1.8594	-0.896242	-0.450577	0.110948	-0.0444655	-1.40939	-0.511	-1.29152	-0.283564	-0.777439	0.166704	-0.108737	-0.766317	-0.575367	-0.854864	0.151042	-0.540684	3871	Q15061	Q15061	WD repeat-containing protein 43	WDR43	WDR43	-1.24757	-0.52746	0.720107
-0.90332	-0.968707	-1.92671	-1.77126	-0.362073	-1.0962	-1.68935	-1.19118	0.169771	-1.35199	-1.32707	-1.85779	-0.940109	-1.04918	-1.38815	-1.15245	-0.399517	-0.780766	-0.811526	-0.190642	-0.748963	-0.936705	-0.561425	-0.665756	-1.32545	-1.42983	-0.26096	-0.0353613	-0.255834	-1.95283	-0.621129	-1.45367	-0.449466	NaN	0.103911	-0.234173	-1.01468	-1.05935	-1.25312	-0.44325	-0.5654	4646	Q6RFH5;Q6RFH5-2	Q6RFH5;Q6RFH5-2	WD repeat-containing protein 74	WDR74	WDR74	-1.19118	-0.665756	0.525424
1.95884	1.62666	-0.648522	-0.825933	2.62148	0.816136	-1.08559	-1.34927	1.43546	-0.461856	-0.292514	0.176881	0.848854	-0.662292	1.58725	0.243124	1.51637	2.67761	2.15368	2.66223	1.64044	1.93921	2.4849	1.69414	-0.574239	0.100733	1.50921	2.5341	2.68368	0.455505	0.775298	-1.37157	2.89489	1.22252	2.50224	1.80105	1.29845	1.91507	1.77627	1.45547	2.50108	2689	P51649;P51649-2	P51649;P51649-2	Succinate-semialdehyde dehydrogenase, mitochondrial	ALDH5A1	ALDH5A1	0.176881	1.7352	1.55832
NaN	-1.00379	0.225003	0.406914	-0.606415	0.108303	-0.035857	-0.616923	-0.748374	-0.954761	-0.718515	0.0302315	-0.959201	0.206379	-0.168258	-1.4323	-0.890259	-1.26675	-0.068417	0.495216	-0.434231	0.306946	0.00784049	-0.274211	-0.560171	0.0993701	-0.905846	-0.106409	-0.58775	0.0462561	-0.581723	0.0896238	-0.212882	-0.413745	0.142399	-0.763862	0.454126	0.190754	-0.932165	0.256357	-0.872944	390	O14874-2;O14874-3;O14874	O14874-2;O14874-3;O14874	[3-methyl-2-oxobutanoate dehydrogenase [lipoamide]] kinase, mitochondrial	BCKDK	BCKDK	-0.387336	-0.243547	0.14379
NaN	1.48063	NaN	1.6228	2.16572	1.15158	NaN	-0.988769	1.44447	NaN	1.61443	1.36618	NaN	1.55038	NaN	NaN	2.27987	NaN	1.39717	NaN	1.71209	NaN	1.99483	1.90542	1.47049	0.616457	NaN	NaN	NaN	NaN	1.00602	1.1907	NaN	NaN	NaN	NaN	NaN	NaN	NaN	NaN	NaN	2816	P54922;Q8NDY3-2	P54922	[Protein ADP-ribosylarginine] hydrolase	ADPRH	ADPRH	1.48063	1.47049	-0.0101407
1.72814	1.05979	-0.498321	-0.39541	2.08752	-0.485143	-1.84625	-0.181791	0.224729	0.534028	-0.45359	-0.159481	-0.60083	-0.91046	-0.500064	1.33144	0.851752	-0.553504	1.14077	0.310912	1.30723	0.387366	1.65893	-0.778774	-0.386002	-0.988323	1.8841	1.50566	1.74801	-1.47216	1.44358	-0.0166903	2.00483	1.12003	0.748816	1.905	-1.09413	1.64632	1.33256	1.16959	1.65218	6201	Q96HY7	Q96HY7	Probable 2-oxoglutarate dehydrogenase E1 component DHKTD1, mitochondrial	DHTKD1	DHTKD1	-0.39541	1.15518	1.55059
1.21541	0.829741	1.13629	0.99302	1.17002	0.798861	-0.294754	0.703437	1.51894	0.951379	0.596512	0.528571	-0.129957	-0.411928	1.0206	0.940768	1.11575	-0.325898	1.35503	1.36586	1.80358	1.07586	1.18995	-0.0784549	0.629581	0.0772304	0.944109	0.955698	0.971159	0.752612	1.44432	-0.625446	1.14997	1.37259	1.7858	1.51931	1.40617	1.31883	1.34576	0.959011	1.62677	3881	Q15120;Q15120-2	Q15120;Q15120-2	[Pyruvate dehydrogenase (acetyl-transferring)] kinase isozyme 3, mitochondrial	PDK3	PDK3	0.829741	1.13286	0.30312
1.3263	1.19709	1.02291	0.77761	0.859373	0.271767	-0.126546	0.773081	0.93686	0.929804	0.533564	0.636363	0.821352	0.708457	1.00484	0.555516	1.34548	1.19478	0.67954	1.30841	0.738949	1.29745	1.02269	1.32993	0.524749	0.963984	0.571019	0.968507	0.65547	0.503985	0.971971	0.59147	1.08619	1.13749	1.13964	0.830769	0.990734	0.929471	0.938372	1.15169	0.93998	7692	Q9P0J1;Q9P0J1-2	Q9P0J1;Q9P0J1-2	[Pyruvate dehydrogenase [acetyl-transferring]]-phosphatase 1, mitochondrial	PDP1	PDP1	0.821352	0.966246	0.144894
-1.88233	-3.0594	NaN	-2.09577	NaN	-1.68117	NaN	-1.87868	-2.40252	0.13221	-1.64553	-1.56927	-1.98595	NaN	-3.26339	-1.57217	-2.33242	-1.90238	-2.86456	-2.00488	-1.83937	-1.84568	-2.17284	-2.4423	-1.659	-3.08484	-1.40755	-1.44372	-1.50573	-1.30169	-1.97987	-1.4197	NaN	-1.75193	-2.39776	-2.22688	NaN	NaN	-2.46046	NaN	-1.73409	6713	Q9BV57;Q9BV57-2	Q9BV57;Q9BV57-2	1,2-dihydroxy-3-keto-5-methylthiopentene dioxygenase	ADI1	ADI1	-1.88233	-1.87403	0.00829542
-0.949445	-0.68639	-1.23559	-1.10895	-1.24877	-0.842203	-0.695291	0.0848672	-0.892606	-0.50635	-0.830286	-0.346043	-0.466948	-1.00599	-0.254336	-0.190926	-0.713222	-0.171854	-0.408224	-1.62874	-0.156351	-1.67621	-0.250424	-1.01601	-1.19301	-0.53848	-1.77948	-1.66354	-0.375677	-0.5057	-0.372369	-1.55226	-0.692805	0.882673	-0.9622	-0.888515	-1.11617	-1.01139	0.632694	-1.64918	-0.29002	3302	Q04446	Q04446	1,4-alpha-glucan-branching enzyme	GBE1	GBE1	-0.830286	-0.703014	0.127272
0.0171487	0.0182863	-0.269408	-0.286147	0.0440923	-0.640709	-0.336253	-0.360422	0.123064	-0.087633	-0.343535	-0.453475	-0.477176	-0.393894	-0.228252	-0.364479	-0.0661121	-0.178925	-0.320926	0.139806	-0.101147	0.133358	-0.259877	0.0435157	-0.379286	-0.0214374	0.23998	0.476375	0.314149	-0.459242	-0.209526	-0.41149	0.0448828	0.0552194	0.17726	0.0693097	-0.0404542	-0.0569497	-0.188669	0.4705	-0.326393	3853	Q15029-2;Q15029;Q15029-3	Q15029-2;Q15029;Q15029-3	116 kDa U5 small nuclear ribonucleoprotein component	EFTUD2	EFTUD2	-0.286147	-0.0487019	0.237446
-0.291427	-0.859589	-1.5848	0.286478	-0.867883	0.328197	0.364927	-0.339212	-1.71252	-2.31903	0.594881	0.34909	0.096176	-0.0523112	-0.737815	-0.0131701	-0.644101	0.538202	-1.39983	-1.71978	0.078668	-1.36621	0.0696501	-0.659849	0.448266	-1.92702	-0.973972	-1.50426	-0.882478	0.65421	-0.461659	0.411046	-0.530664	-0.974577	-1.42149	-1.23385	-1.95265	-1.93328	-0.287785	-1.33576	0.0402684	7416	Q9NRX4;Q9NRX4-2	Q9NRX4;Q9NRX4-2	14 kDa phosphohistidine phosphatase	PHPT1	PHPT1	-0.291427	-0.771164	-0.479737
0.170264	-0.1589	0.508978	0.517445	-0.42	0.206135	0.413746	0.59812	-0.638681	0.0229579	0.573116	0.609315	0.410521	0.429337	0.248712	0.493131	-0.280767	0.106266	0.0236379	-0.979997	0.184759	-0.657119	-0.188962	-0.24352	0.80727	-0.151251	0.0106627	-0.552568	-0.788225	0.484272	0.00559634	0.363718	-0.65313	-0.0545762	-0.434851	-0.36671	-0.096072	-0.399474	0.509468	-0.760968	-0.102415	2208	P31946	P31946	14-3-3 protein beta/alpha;14-3-3 protein beta/alpha, N-terminally processed	YWHAB	YWHAB	0.410521	-0.126833	-0.537354
0.368868	0.104747	0.173478	0.196028	-0.152933	0.68848	0.689719	0.28474	-0.00781745	-0.151087	0.419956	0.451351	0.357886	0.153134	0.214892	0.42476	0.122024	0.381	0.764638	-0.680966	-0.00259217	-0.505166	0.405836	0.0648326	0.285575	0.0628953	0.152756	-0.493039	-0.21816	0.42431	0.356431	0.165118	-0.105897	-0.419834	-0.490845	-0.168159	-0.204566	-0.253457	0.275881	-0.370923	0.401985	3004	P62258;P62258-2	P62258;P62258-2	14-3-3 protein epsilon	YWHAE	YWHAE	0.214892	0.0638639	-0.151028
0.479085	-0.143296	0.81742	0.64877	0.239	1.27334	1.37863	1.4725	0.69219	1.03103	0.903273	1.17093	0.890762	0.84596	0.973595	1.35091	0.813986	0.361776	1.53101	-0.543323	1.03808	-0.0604195	0.58489	0.549529	1.16312	0.891995	0.516542	-0.145079	-0.247454	0.930061	1.17078	0.900699	-0.230232	0.9113	-0.0275486	0.690842	0.583474	0.258916	1.07965	-0.396028	0.383709	3314	Q04917;REV__Q7Z5H3-4;REV__Q7Z5H3-3;REV__P13521;REV__Q7Z5H3;REV__Q7Z5H3-5;REV__Q7Z5H3-2	Q04917	14-3-3 protein eta	YWHAH	YWHAH	0.890762	0.584182	-0.30658
-0.187581	-0.238612	-0.239271	-0.0246008	-0.795241	0.127557	0.0563485	0.0691905	-0.912521	-0.363569	0.00480021	0.258702	-0.00128703	-0.178068	-0.290149	-0.0970195	-0.725517	-0.11483	0.00997513	-1.03318	-0.268297	-0.982347	-0.23915	-0.675691	0.197909	-0.641259	-0.428014	-1.00903	-0.989801	-0.0527536	-0.614287	0.11643	-0.580543	-1.10631	-0.959148	-0.990004	-0.575264	-0.757359	-0.2889	-0.639031	0.020892	2991	P61981	P61981	14-3-3 protein gamma;14-3-3 protein gamma, N-terminally processed	YWHAG	YWHAG	-0.178068	-0.597415	-0.419347
0.149682	0.0280633	0.183323	0.328512	-0.342322	0.461903	0.466311	0.554742	-0.379498	-0.167091	0.208595	0.60219	0.423245	-0.153631	0.173851	0.425296	-0.074929	0.284037	0.3432	-0.886323	-0.0893343	-0.512771	-0.233703	-0.171672	0.53422	0.0821957	-0.183965	NaN	-0.654256	0.211071	-0.0641591	0.194608	-0.654386	-0.153555	-0.368482	-0.080649	NaN	-0.507308	0.43083	NaN	-0.124546	2210	P31947-2;P31947	P31947-2;P31947	14-3-3 protein sigma	SFN	SFN	0.183323	-0.0893343	-0.272657
0.39305	0.373989	-0.189649	-0.214831	-0.176116	0.813115	0.53695	0.115423	-0.0459733	-0.40528	0.110181	0.229011	0.150382	-0.0846166	-0.18931	0.451845	0.204871	0.748559	0.558769	-0.951313	0.019821	-0.787111	0.466267	0.138787	0.348699	-0.36899	0.227082	-0.333886	-0.0180492	0.235497	0.270401	0.227589	-0.309143	-0.48096	-0.585685	-0.190729	-0.696761	-0.551696	0.399419	-0.354809	0.225787	2052	P27348	P27348	14-3-3 protein theta	YWHAQ	YWHAQ	0.110181	0.0793042	-0.0308771
0.398684	0.293198	0.453429	0.656972	-0.245829	1.00875	0.704333	0.62854	-0.356343	0.0116358	0.673914	0.815926	0.715348	0.50168	0.405131	0.654767	0.14512	0.873116	1.30907	-0.966012	0.228526	-0.488674	0.111468	0.032287	0.943179	0.0149265	0.148181	-0.248253	-0.612911	0.49854	0.372475	0.906758	-0.399016	-0.0791163	-0.310227	-0.220917	-0.130605	-0.354102	0.59721	-0.488042	0.375276	3070	P63104;P63104-2;REV__P53355-4;REV__P53355;REV__P53355-3	P63104	14-3-3 protein zeta/delta	YWHAZ	YWHAZ	0.50168	0.0718774	-0.429802
0.689576	0.859981	1.0326	0.842101	1.45898	0.452074	0.692039	0.663554	0.566342	0.83251	0.749704	0.638227	0.757393	0.82776	1.12732	0.57437	0.90793	0.892576	0.642324	0.985689	0.936282	1.01672	0.749304	1.38198	0.692819	1.33745	0.24797	0.0701719	0.458367	0.620809	0.755254	0.833711	0.889724	0.884973	0.0416674	0.895937	1.22601	0.7913	0.509157	0.387038	0.663565	702	O60613;O60613-2	O60613	15 kDa selenoprotein	SELENOF	SELENOF	0.757393	0.773277	0.0158844
NaN	NaN	-2.90765	NaN	-2.97158	-2.09418	-0.0568605	-1.02213	-0.85191	NaN	NaN	NaN	NaN	NaN	NaN	-0.817719	-1.03841	NaN	NaN	-0.572365	NaN	-0.661905	-1.445	NaN	-2.0347	-3.3198	NaN	-0.433513	-1.67062	-2.60748	-1.03197	-1.61203	-0.865406	NaN	NaN	NaN	NaN	-1.91043	NaN	-0.814832	-1.82006	6878	Q9C0C2;Q9C0C2-2	Q9C0C2	182 kDa tankyrase-1-binding protein	TNKS1BP1	TNKS1BP1	-1.55816	-1.24171	0.316448
1.08957	0.909835	0.538989	0.259179	1.02247	0.393837	0.219785	0.299664	0.793308	1.00624	0.497304	0.30277	0.228328	0.371424	0.554581	0.592585	0.492373	1.59014	1.03574	1.09937	0.631494	0.966306	0.80133	1.08639	0.276373	0.73193	0.45546	0.569804	0.86508	0.796199	0.51286	0.729481	0.614903	1.00567	0.480231	1.20049	0.785299	0.73952	0.257955	0.910552	0.710547	6533	Q99943	Q99943	1-acyl-sn-glycerol-3-phosphate acyltransferase alpha	AGPAT1	AGPAT1	0.497304	0.735725	0.238421
-0.746934	-0.434205	-0.40074	-0.398286	-1.04093	NaN	0.0278541	-0.383371	-0.244394	-0.150326	-0.306467	-0.770254	-1.5321	-0.182097	-0.620542	-1.41618	-0.616946	-1.26697	-1.02322	-0.045213	-0.547793	-0.344798	-1.12851	-0.222948	-1.1021	0.0130864	-0.379148	-0.213664	-0.926056	-0.534602	-0.991991	-0.611174	-0.558159	-0.113945	-0.415542	-0.371842	-0.179964	-0.311655	0.15835	-0.332766	-1.38712	436	O15120;O15120-2	O15120;O15120-2	1-acyl-sn-glycerol-3-phosphate acyltransferase beta	AGPAT2	AGPAT2	-0.399513	-0.475072	-0.075559
NaN	0.574563	1.21576	1.35267	0.29544	NaN	0.587823	0.872743	0.679722	1.43126	0.983764	0.597208	1.1825	0.976684	NaN	-0.00366064	-0.353407	-0.351655	-0.321083	0.93658	-0.471233	1.11416	-1.03285	0.0321386	NaN	1.99035	1.05265	1.22059	-0.00237181	1.32772	0.292794	0.97504	0.461532	NaN	0.99486	0.741163	1.44869	1.54371	NaN	NaN	0.742217	7422	Q9NRZ7;Q9NRZ7-2;Q9NRZ7-3	Q9NRZ7;Q9NRZ7-2;Q9NRZ7-3	1-acyl-sn-glycerol-3-phosphate acyltransferase gamma	AGPAT3	AGPAT3	0.924713	0.74169	-0.183023
NaN	-0.293054	-0.0779608	-0.0346302	-0.181821	-0.620544	NaN	0.028954	-0.2928	-0.289192	NaN	0.0340718	0.109981	-0.435774	0.237955	0.238588	-0.161585	0.110508	-0.331095	-0.293705	-0.0583889	-0.0216179	-0.469488	NaN	NaN	-0.0530425	0.0710427	NaN	-0.079316	-0.231136	0.0633595	NaN	-0.468204	-0.250296	-0.112423	-0.278985	-0.266115	-0.0870179	-0.0430032	-0.394464	0.759388	8181	Q9Y2I7;Q9Y2I7-2;Q9Y2I7-3;Q9Y2I7-4	Q9Y2I7	1-phosphatidylinositol 3-phosphate 5-kinase	PIKFYVE	PIKFYVE	-0.129891	-0.0997203	0.0301708
0.912988	0.40889	1.22594	1.5855	1.48659	1.75123	1.0478	1.64691	1.43443	1.2399	1.47709	1.2304	1.72067	0.935406	1.51469	1.82547	1.73883	0.997141	1.4727	0.254758	1.41924	0.474748	2.0766	0.570563	1.68828	1.40653	1.094	-0.0852144	0.605279	1.64562	1.83368	1.31532	0.710818	0.406907	0.911908	1.18196	1.06014	0.826332	1.29365	-0.505154	1.28368	3210	Q00722-3;Q00722-2;Q00722	Q00722-3;Q00722-2;Q00722	1-phosphatidylinositol 4,5-bisphosphate phosphodiesterase beta-2	PLCB2	PLCB2	1.43443	1.13798	-0.296447
-1.35569	NaN	0.0540319	-0.482805	-0.647987	0.00882711	-0.0776479	0.197013	-0.476158	-0.403493	0.12975	0.0264675	-0.366306	-0.188189	-0.690485	0.0906389	-0.845147	-1.59531	0.0514053	-0.254839	-0.886894	-0.973878	-0.114342	-0.849271	-0.0101709	-0.734915	-0.83587	NaN	-1.34078	-0.182017	-0.307032	0.276892	-0.475316	-1.46973	-0.78661	-0.550459	-0.292853	-1.08996	-0.721531	NaN	-1.256	3247	Q01970;Q01970-2	Q01970;Q01970-2	1-phosphatidylinositol 4,5-bisphosphate phosphodiesterase beta-3	PLCB3	PLCB3	-0.277248	-0.728223	-0.450975
-0.514365	-0.721842	-0.0629616	0.401795	-0.280397	0.066724	-0.222129	-0.317428	-1.88108	-0.864257	0.42496	0.609556	0.475426	0.232362	0.124374	-0.188645	-0.709542	-0.393848	0.0543968	-1.29081	0.236808	-1.18831	-0.369673	-0.82381	0.213818	-0.634132	-0.0727616	-1.17963	-1.05933	0.407204	-0.646779	0.651069	-1.15984	0.0845223	-0.769085	-1.26107	-0.84554	-0.643783	0.370025	-1.27893	0.237154	1761	P16885	P16885	1-phosphatidylinositol 4,5-bisphosphate phosphodiesterase gamma-2	PLCG2	PLCG2	-0.0629616	-0.638958	-0.575996
-0.503266	-0.583536	-0.511844	-0.203215	-0.375501	-0.253277	-0.249864	-0.380358	-0.804044	-0.454583	-0.236994	-0.0530743	-0.295138	-0.0870234	-0.694859	-0.606154	-0.186416	-0.749269	-0.757536	-0.620609	-0.300416	-0.703841	-0.491841	-0.326599	-0.00217372	-0.498182	-0.350388	-0.464514	-0.548593	-0.294258	-0.345273	-1.10525	-0.669269	-0.463991	-1.09577	-0.774181	-0.45935	-0.534361	-0.681608	-0.68024	-0.426177	1487	P09543-2;P09543	P09543-2;P09543	2,3-cyclic-nucleotide 3-phosphodiesterase	CNP	CNP	-0.375501	-0.516272	-0.140771
0.0752203	0.229124	0.404248	0.0784959	-0.247842	0.43945	-0.0575861	0.145383	0.124843	0.458012	-0.103806	-0.210497	-0.0428433	0.327617	0.0649306	-0.0164715	0.246638	0.105208	0.322026	0.708349	-0.0931591	0.276441	0.210631	0.0389437	0.201648	0.371798	-0.19247	0.607591	0.508568	0.063133	-0.0795539	0.662218	0.744488	0.224303	0.501353	0.227133	0.561905	0.448942	-0.0516062	0.495708	-0.302104	4059	Q16698-2;Q16698	Q16698-2;Q16698	2,4-dienoyl-CoA reductase, mitochondrial	DECR1	DECR1	0.0784959	0.236885	0.15839
-0.153769	-0.348474	-0.732144	-0.25906	-0.625141	-0.0610714	-0.075767	-0.172047	-0.360667	-0.69698	-0.327197	-0.438949	-0.310734	-0.237069	-0.863799	-0.118551	-0.226783	-0.352745	-0.432925	-0.416089	-0.609869	-0.686211	-0.125364	-0.565055	0.0476455	-0.53408	-0.241113	-0.398411	-0.487271	-0.467372	-0.266616	-0.472629	-0.430987	-0.753666	-0.70336	-0.479089	-0.592315	-0.574346	-0.508951	-0.404998	-0.387094	4532	Q6L8Q7;Q6L8Q7-2	Q6L8Q7;Q6L8Q7-2	2,5-phosphodiesterase 12	PDE12	PDE12	-0.327197	-0.450148	-0.122952
-0.701579	-0.187572	0.480482	0.495718	-0.287415	0.213126	-0.211678	0.283418	-0.682059	NaN	0.310026	0.672471	0.27041	0.468279	0.307956	0.350948	0.193836	0.328958	0.419683	NaN	0.113166	-1.12564	-0.281473	0.0587638	0.326568	-0.728522	-1.32764	NaN	-1.19161	0.422708	0.0791354	0.859082	-0.591404	NaN	-0.385515	-0.386626	-0.405119	-0.47699	-0.517452	NaN	-0.370837	3327	Q05823;Q05823-2	Q05823;Q05823-2	2-5A-dependent ribonuclease	RNASEL	RNASEL	0.276914	-0.326155	-0.603069
NaN	NaN	2.8924	1.97845	1.19668	NaN	2.9331	2.95584	2.98436	2.45097	NaN	NaN	1.86309	0.847154	NaN	NaN	NaN	NaN	NaN	NaN	NaN	NaN	2.89801	1.34984	3.49268	NaN	2.53363	2.2862	NaN	1.89882	2.03786	1.52331	NaN	NaN	NaN	1.47347	2.55551	-1.07187	NaN	NaN	2.02666	1179	P00973-2;P00973-4;P00973;P00973-3	P00973-2;P00973-4;P00973;P00973-3	2-5-oligoadenylate synthase 1	OAS1	OAS1	2.45097	2.03226	-0.418713
NaN	-0.396839	-1.08382	1.40272	0.0262928	2.31984	1.15616	1.36439	0.344266	1.54689	-0.18782	0.807999	1.46901	1.06367	0.16099	-0.0918664	1.91981	-0.423961	NaN	-0.414196	1.2459	-0.0895119	3.28026	1.38049	2.59978	0.0439019	3.08828	1.62025	-0.38829	0.916756	1.33191	1.40549	0.0859743	0.442695	0.294077	0.383066	1.51254	NaN	0.621537	NaN	0.262459	2123	P29728-2;P29728;P29728-3	P29728-2;P29728	2-5-oligoadenylate synthase 2	OAS2	OAS2	0.935832	0.621537	-0.314295
NaN	2.85049	2.69011	0.861143	0.429122	NaN	NaN	1.00952	NaN	NaN	NaN	NaN	NaN	1.39458	NaN	NaN	3.4055	2.37945	1.34996	NaN	1.51612	3.44562	NaN	2.9058	2.59738	NaN	NaN	NaN	2.32726	NaN	NaN	NaN	3.09875	3.17615	NaN	NaN	NaN	NaN	3.69617	2.25342	NaN	3435	Q12805-2;Q12805-4;Q12805-3;Q12805;Q12805-5	Q12805-2;Q12805-4;Q12805-3;Q12805;Q12805-5	EGF-containing fibulin-like extracellular matrix protein 1	EFEMP1	EFEMP1	1.20205	2.75159	1.54954
-0.23721	-0.544373	-0.240431	-0.0496707	-0.76263	-0.0522419	0.0550974	0.051013	-0.62706	-0.342827	-0.0505045	-0.0527568	-0.0917062	-0.0736155	-0.320387	-0.161826	-0.455177	-0.539703	-0.234319	-0.631057	-0.510345	-0.740369	-0.360738	-0.689653	0.0491411	-0.32641	-0.493632	-0.700745	-0.573987	-0.0536288	-0.3992	-0.113557	-0.564703	-0.237938	-0.970283	-0.518396	-0.550208	-0.345234	0.000578813	-0.566319	-0.152484	3021	P62333	P62333	26S protease regulatory subunit 10B	PSMC6	PSMC6	-0.0917062	-0.474404	-0.382698
-0.126233	-0.531738	-0.0587999	-0.0166119	-0.710531	-0.0355148	0.113528	0.0381803	-0.612741	-0.237748	-0.138471	0.0366315	-0.0420045	-0.0388442	-0.264533	-0.206078	-0.46932	-0.660208	-0.284283	-0.590122	-0.454529	-0.568856	-0.423131	-0.553251	0.0463688	-0.263169	-0.470944	-0.702808	-0.56764	-0.060161	-0.46386	-0.0566407	-0.580543	-0.126088	-0.75194	-0.4134	-0.503687	-0.354461	-0.0693815	-0.484111	-0.30552	2997	P62191;P62191-2	P62191;P62191-2	26S protease regulatory subunit 4	PSMC1	PSMC1	-0.0587999	-0.459194	-0.400394
-0.18654	-0.529293	-0.272311	-0.0915779	-0.819733	-0.073454	0.0997414	0.0046465	-0.714168	-0.319189	0.00347076	0.0621719	-0.0965318	-0.142215	-0.275784	-0.127167	-0.500259	-0.53523	-0.244365	-0.636174	-0.50274	-0.688235	-0.474035	-0.575199	0.0195078	-0.304327	-0.481219	-0.59836	-0.568821	-0.123656	-0.387905	-0.193697	-0.545166	-0.252185	-0.92183	-0.506852	-0.486003	-0.470627	-0.0736846	-0.527786	-0.191066	1806	P17980	P17980	26S protease regulatory subunit 6A	PSMC3	PSMC3	-0.142215	-0.483611	-0.341396
0.0387459	-0.384215	-0.040818	0.0244506	-0.676082	0.062654	0.155505	0.0795227	-0.622931	-0.173216	0.00278654	0.1497	0.0177695	0.0571005	-0.0661024	-0.172163	-0.335128	-0.470822	-0.0825562	-0.497372	-0.454761	-0.486825	-0.282616	-0.486977	0.202089	-0.152471	-0.338985	-0.447876	-0.473354	0.0543626	-0.307192	0.0855074	-0.422987	-0.112393	-0.830728	-0.447761	-0.349278	-0.20156	0.0362525	-0.389349	-0.144164	2457	P43686;P43686-2	P43686;P43686-2	26S protease regulatory subunit 6B	PSMC4	PSMC4	0.0177695	-0.337057	-0.354826
-0.152571	-0.558471	-0.0937052	-0.0924985	-0.805023	-0.0557584	0.103292	0.0093164	-0.686492	-0.214362	-0.0663257	0.0148022	-0.0684998	-0.0253402	-0.287371	-0.328077	-0.503207	-0.691509	-0.195452	-0.485387	-0.496109	-0.639976	-0.528427	-0.604219	-0.0265964	-0.236264	-0.623338	-0.759886	-0.577058	-0.0947155	-0.477439	-0.0822235	-0.538621	-0.263116	-0.931563	-0.557152	-0.415595	-0.383889	-0.0744005	-0.57823	-0.207452	2300	P35998;P35998-2	P35998;P35998-2	26S protease regulatory subunit 7	PSMC2	PSMC2	-0.0924985	-0.490748	-0.39825
-0.0233635	-0.472422	-0.118752	0.0418028	-0.592192	-0.0728517	0.169479	-0.0297761	-0.550186	-0.112512	0.0435575	0.0402309	-0.0627526	-0.0280204	-0.168258	-0.254978	-0.433354	-0.573948	-0.0722039	-0.55888	-0.48219	-0.639976	-0.462769	-0.502888	0.153608	-0.125507	-0.532859	-0.530875	-0.538405	0.013708	-0.38913	-0.00674687	-0.560954	-0.0801149	-0.798846	-0.533421	-0.381212	-0.323304	-0.0187772	-0.373725	-0.180586	2998	P62195;P62195-2	P62195;P62195-2	26S protease regulatory subunit 8	PSMC5	PSMC5	-0.0627526	-0.411242	-0.34849
-0.11316	-0.463497	-0.0421944	0.0339931	-0.523291	0.0275429	0.222721	-0.142451	-0.49137	-0.0608111	0.168991	0.100075	0.0588602	0.0580654	-0.143707	-0.257873	-0.425085	-0.55388	-0.116039	-0.485436	-0.539285	-0.580059	-0.397497	-0.50883	0.0932736	-0.122278	-0.387412	-0.601223	-0.470022	0.0614165	-0.377461	-0.0528143	-0.408138	-0.107434	-0.808767	-0.448248	-0.326156	-0.225066	-0.00965039	-0.329052	-0.0636391	6449	Q99460;Q99460-2	Q99460;Q99460-2	26S proteasome non-ATPase regulatory subunit 1	PSMD1	PSMD1	-0.0421944	-0.382436	-0.340242
0.669654	-0.0522382	-1.03091	0.325156	-0.0131613	0.599197	0.368754	0.186985	-0.356064	-0.986505	0.595439	0.404303	0.501423	0.124114	-0.0818528	0.718169	0.168631	1.18923	0.275341	-1.46769	0.395634	-1.2771	0.242663	0.210162	0.365014	-1.04103	0.0389861	-0.900791	-0.389858	0.414557	0.327675	0.365855	-0.0984439	-0.806011	-1.02035	-0.111848	-0.976509	-1.17918	0.599617	NaN	0.608586	898	O75832;O75832-2	O75832	26S proteasome non-ATPase regulatory subunit 10	PSMD10	PSMD10	0.186985	0.168631	-0.0183541
-0.344079	-0.665937	-0.245194	-0.26173	-1.00782	-0.139549	-0.0325979	-0.0653873	-0.925172	-0.46236	-0.276209	-0.124799	-0.278433	-0.292803	-0.393463	-0.349524	-0.650712	-0.810774	-0.441858	-0.707052	-0.649881	-0.727561	-0.631754	-0.815266	0.00589422	-0.44247	-0.675623	-0.732015	-0.713746	-0.291695	-0.55856	-0.294892	-0.773716	-0.219455	-1.01791	-0.723886	-0.692068	-0.575163	-0.134569	-0.578769	-0.426807	254	O00231;O00231-2	O00231;O00231-2	26S proteasome non-ATPase regulatory subunit 11	PSMD11	PSMD11	-0.278433	-0.640817	-0.362385
-0.344664	-0.624042	-0.247249	-0.173732	-0.938033	-0.199621	-0.0661872	-0.160115	-0.844117	-0.447983	-0.0622886	-0.0191302	-0.179407	-0.333266	-0.386832	-0.340133	-0.663258	-0.814663	-0.351404	-0.72412	-0.535452	-0.765417	-0.612974	-0.756634	0.0499729	-0.433601	-0.569968	-0.669137	-0.7105	-0.203326	-0.599167	-0.302118	-0.740826	-0.214232	-1.0354	-0.658151	-0.636531	-0.622136	-0.10374	-0.531746	-0.254877	255	O00232;O00232-2	O00232;O00232-2	26S proteasome non-ATPase regulatory subunit 12	PSMD12	PSMD12	-0.247249	-0.60607	-0.358821
-0.336923	-0.688753	-0.363812	-0.206128	-0.982451	-0.137563	-0.0921925	-0.158473	-0.813398	-0.470192	-0.180166	-0.179434	-0.239053	-0.233729	-0.409595	-0.363037	-0.604699	-0.802491	-0.334834	-0.74054	-0.600455	-0.750453	-0.582018	-0.792753	-0.083628	-0.382839	-0.763688	-0.741355	-0.790975	-0.247035	-0.700682	-0.290001	-0.769947	-0.281411	-1.0868	-0.809607	-0.651503	-0.553874	-0.123533	-0.604385	-0.376449	8071	Q9UNM6;Q9UNM6-2	Q9UNM6;Q9UNM6-2	26S proteasome non-ATPase regulatory subunit 13	PSMD13	PSMD13	-0.239053	-0.604542	-0.365489
-0.0796841	-0.555361	-0.187243	-0.209827	-0.813845	0.0545127	6.90216e-05	-0.367962	-0.781325	-0.363569	-0.102139	0.0176353	-0.108133	-0.153546	-0.350838	-0.378196	-0.640735	-0.734603	-0.223547	-0.604259	-0.733417	-0.648689	-0.584954	-0.645564	0.0774904	-0.321362	-0.584633	-0.613723	-0.694963	-0.257701	-0.52195	-0.228819	-0.502578	-0.25681	-1.11243	-0.59846	-0.526112	-0.532574	-0.123949	-0.55157	-0.354933	299	O00487	O00487	26S proteasome non-ATPase regulatory subunit 14	PSMD14	PSMD14	-0.187243	-0.542072	-0.354829
-0.176877	-0.538962	-0.181613	-0.063431	-0.717459	-0.0426642	0.117889	0.0551907	-0.759795	-0.247463	-0.0654314	-0.0151553	-0.100353	-0.071486	-0.255472	-0.375811	-0.483546	-0.688871	-0.238608	-0.554701	-0.47215	-0.6431	-0.437535	-0.612367	0.0665464	-0.289892	-0.504839	-0.714392	-0.601278	-0.0942208	-0.409969	-0.0447475	-0.604413	-0.223598	-0.939462	-0.533421	-0.419186	-0.400631	-0.063913	-0.50586	-0.234998	3518	Q13200;Q13200-3;Q13200-2	Q13200;Q13200-3;Q13200-2	26S proteasome non-ATPase regulatory subunit 2	PSMD2	PSMD2	-0.100353	-0.454842	-0.354489
-0.36949	-0.700993	-0.385779	-0.274874	-0.992558	-0.311821	-0.147408	-0.0552456	-0.933356	-0.449916	-0.238332	-0.184577	-0.28968	-0.334636	-0.393203	-0.28388	-0.698919	-0.817767	-0.506333	-0.655431	-0.646122	-0.799374	-0.717197	-0.88249	-0.203626	-0.522127	-0.721588	-0.771443	-0.764839	-0.304914	-0.520673	-0.358717	-0.729113	-0.321348	-1.05662	-0.713621	-0.698195	-0.574959	-0.233932	-0.736074	-0.524926	524	O43242;O43242-2	O43242;O43242-2	26S proteasome non-ATPase regulatory subunit 3	PSMD3	PSMD3	-0.334636	-0.676813	-0.342177
-0.131376	-0.493443	-0.10423	-0.0423204	-0.706253	0.0442089	0.172611	0.0555725	-0.386228	-0.299681	-0.0778259	0.0920113	0.0340316	-0.0754725	-0.201273	-0.303881	-0.477784	-0.665764	-0.146017	-0.605452	-0.603914	-0.682149	-0.34477	-0.581693	0.173301	-0.348987	-0.374778	-0.63931	-0.505816	-0.119815	-0.381462	-0.0553082	-0.445581	-0.421536	-0.863042	-0.502163	-0.496793	-0.174535	-0.038756	-0.460007	-0.320323	2820	P55036	P55036	26S proteasome non-ATPase regulatory subunit 4	PSMD4	PSMD4	-0.0778259	-0.433558	-0.355732
-0.288756	0.966721	-0.00582212	0.73286	0.406446	0.914302	0.631752	0.896607	0.387951	-0.305348	0.86276	0.599155	0.696109	0.546061	0.380792	0.763322	0.999905	1.41462	0.637974	-0.720117	-0.155641	-0.750073	0.954462	0.643725	0.241458	0.00782864	0.452175	-0.206834	-0.559891	0.851702	0.308329	0.273547	0.317511	-0.118393	-0.448186	0.157301	-0.472012	-0.0845307	0.868693	-0.272979	0.881243	4021	Q16401;Q16401-2	Q16401;Q16401-2	26S proteasome non-ATPase regulatory subunit 5	PSMD5	PSMD5	0.599155	0.257502	-0.341653
-0.36615	-0.659287	-0.378064	-0.213385	-0.974624	-0.117496	-0.122067	0.0408066	-0.787834	-0.433452	-0.253502	-0.0972947	-0.238362	-0.305446	-0.306717	-0.341269	-0.610987	-0.801158	-0.348473	-0.698722	-0.587386	-0.752449	-0.67097	-0.849901	-0.139423	-0.373752	-0.636277	-0.753698	-0.656377	-0.199496	-0.493796	-0.221036	-0.695588	-0.162039	-0.897342	-0.634688	-0.707147	-0.612528	-0.122148	-0.609699	-0.354801	3841	Q15008;Q15008-4;Q15008-3;Q15008-2	Q15008;Q15008-4;Q15008-3;Q15008-2	26S proteasome non-ATPase regulatory subunit 6	PSMD6	PSMD6	-0.305446	-0.611758	-0.306312
-0.272018	-0.75561	-0.442138	-0.19016	-0.915061	-0.156164	-0.044465	-0.0272536	-0.983198	-0.444518	-0.187029	-0.207384	-0.197006	-0.345552	-0.419193	-0.21917	-0.713505	-0.816371	-0.48611	-0.769462	-0.595936	-0.77135	-0.661957	-0.895789	-0.0986592	-0.419431	-0.755635	-0.781843	-0.840816	-0.262317	-0.617242	-0.369561	-0.8543	-0.186209	-0.996111	-0.708821	-0.725827	-0.597139	-0.107944	-0.570719	-0.466618	2691	P51665	P51665	26S proteasome non-ATPase regulatory subunit 7	PSMD7	PSMD7	-0.272018	-0.639599	-0.367581
-0.0787045	-0.549518	-0.180673	-0.0100282	-0.765417	0.0218575	0.0696895	0.0598565	-0.829869	-0.286212	-0.101666	0.0272143	-0.112768	-0.104665	-0.324329	-0.422592	-0.498728	-0.687337	-0.244694	-0.551678	-0.426458	-0.634338	-0.392318	-0.635396	0.0563149	-0.361952	-0.522073	-0.563191	-0.420002	-0.0797714	-0.448252	-0.130497	-0.569303	-0.0251038	-0.802407	-0.464952	-0.54098	-0.378733	-0.0578447	-0.487761	-0.191213	2526	P48556	P48556	26S proteasome non-ATPase regulatory subunit 8	PSMD8	PSMD8	-0.104665	-0.437355	-0.33269
1.19334	-0.502401	-0.343667	0.353876	-0.171447	0.41137	0.876614	0.600869	NaN	-0.505375	0.701484	0.545678	0.486078	0.364224	-0.27312	0.482624	-0.0837212	0.165367	-0.251575	-1.48137	0.388388	NaN	0.0381803	-0.496092	0.560379	-0.492077	-0.075205	0.627629	-0.520424	0.785803	0.416388	0.767018	-0.111966	-0.142459	-0.846754	-0.393459	-0.720756	-0.651248	0.936015	-0.672788	-0.0113938	256	O00233;O00233-2;O00233-3	O00233;O00233-2	26S proteasome non-ATPase regulatory subunit 9	PSMD9	PSMD9	0.387797	-0.0837212	-0.471518
-0.0806631	-0.552083	-0.645506	-0.432882	-0.955204	-0.0412789	-0.535897	-0.438211	-1.17096	-0.903996	-0.364575	-0.205405	-0.281387	-0.489672	-0.939069	-0.528257	-0.909214	-0.0215678	-0.688816	-0.492704	-0.753605	-0.959125	-0.553781	-0.610003	-0.287565	-0.846845	-0.550428	-0.664902	-0.739508	-0.261395	-0.522091	-0.497547	-0.279629	-0.77987	-0.806857	-1.11376	-0.770141	-0.924197	-0.903589	-1.13931	-0.210941	3575	Q13442	Q13442	28 kDa heat- and acid-stable phosphoprotein	PDAP1	PDAP1	-0.489672	-0.676859	-0.187187
-0.655169	-0.697305	-0.22865	-1.05853	-0.665234	NaN	-0.744479	-0.908416	0.0707944	-0.643968	-0.764699	-0.96798	-0.812154	-0.730124	-0.781108	-0.844366	-0.516671	-1.0488	-0.0969184	-0.158632	-0.920463	0.0314161	-0.858224	-0.854618	-0.608347	-0.383364	-0.89504	-0.192227	0.112579	-0.594135	-0.441435	0.329585	-0.108568	-0.226322	-0.409456	-0.0761942	-0.37931	-0.0668487	-1.12168	0.24295	-0.633058	3149	P82664	P82664	28S ribosomal protein S10, mitochondrial	MRPS10	MRPS10	-0.737302	-0.39641	0.340892
NaN	-0.360724	NaN	NaN	-0.15644	NaN	NaN	NaN	0.368723	-0.265288	-0.261551	-0.491997	NaN	NaN	NaN	NaN	NaN	NaN	0.197588	NaN	NaN	NaN	NaN	-0.253996	NaN	0.00449272	-0.346708	NaN	0.566723	NaN	NaN	NaN	-0.211373	NaN	NaN	0.0861212	0.0404213	0.562589	NaN	NaN	0.13334	3153	P82912-2;P82912	P82912-2;P82912	28S ribosomal protein S11, mitochondrial	MRPS11	MRPS11	-0.263419	0.0632712	0.326691
NaN	-0.335238	NaN	-0.459062	NaN	NaN	NaN	NaN	0.0653954	NaN	NaN	-0.279924	NaN	NaN	-0.323785	-0.737858	-0.662575	NaN	-0.206673	-0.0864479	NaN	0.149948	-1.07162	NaN	-0.351231	NaN	-0.44195	-0.266587	0.0683466	NaN	NaN	NaN	-0.147239	NaN	NaN	-0.256054	0.0226586	0.0159054	NaN	NaN	-0.915537	461	O15235	O15235	28S ribosomal protein S12, mitochondrial	MRPS12	MRPS12	-0.323785	-0.256054	0.0677311
-0.167413	-0.181066	0.153359	-0.357826	0.28376	0.0921477	-0.225862	-1.30314	NaN	0.150764	0.0557768	-0.266209	0.00214853	-0.0246267	-0.0905615	-0.353557	0.240644	-0.174587	0.229896	0.721193	-1.31644	NaN	-0.025121	-0.187621	NaN	0.167694	-0.474921	0.147167	1.0202	-0.201731	-0.538035	0.248753	0.398995	-0.129152	-0.220033	0.244564	0.384567	0.611704	NaN	0.524408	0.641277	725	O60783	O60783	28S ribosomal protein S14, mitochondrial	MRPS14	MRPS14	-0.0575941	0.167694	0.225288
-0.895196	-0.514849	-0.73791	-0.463011	-1.3356	-1.4902	-0.757196	-0.358676	0.352763	-0.322543	-1.39795	-0.895145	-0.854814	-0.485202	-0.153302	-0.718852	-0.390814	-0.649555	0.156058	-0.0157071	-0.752943	0.115984	-0.868404	-0.697021	-0.943245	-0.124793	-0.107779	-0.125291	0.671066	-0.83053	-0.083646	-0.181986	-0.181471	-0.0946945	-0.221152	-0.239358	-0.303037	0.0762747	NaN	0.153396	-0.106245	3154	P82914	P82914	28S ribosomal protein S15, mitochondrial	MRPS15	MRPS15	-0.73791	-0.181471	0.556439
NaN	-0.737676	NaN	NaN	NaN	NaN	-0.794278	-0.313844	0.0690738	NaN	-1.03612	-1.2507	NaN	NaN	NaN	NaN	NaN	-1.21014	-0.171225	-0.0968428	NaN	NaN	-1.13672	NaN	NaN	-0.823518	NaN	NaN	-0.215289	-0.775849	-0.608632	NaN	2.45218	-0.482643	-0.348859	-0.557265	NaN	-0.402248	NaN	NaN	-0.754407	8265	Q9Y3D3;Q9Y3D3-2	Q9Y3D3;Q9Y3D3-2	28S ribosomal protein S16, mitochondrial	MRPS16	MRPS16	-0.765977	-0.519954	0.246023
-0.598611	-0.581663	-0.179597	-0.647751	-0.0835257	-0.485814	-0.49971	-0.892267	0.282519	-0.377259	-0.705318	-0.628225	-0.623239	-0.49268	-0.550876	-0.552163	-0.246744	-0.724019	0.223251	0.221753	-0.823516	0.152479	-0.461244	-0.305155	-0.296668	-0.160072	-0.572818	-0.0750835	0.322798	-0.441758	-0.26875	-0.0171248	0.139369	-0.249694	-0.455825	-0.12958	0.019748	0.0271991	-0.984698	-0.00857181	-0.177027	8203	Q9Y2R5	Q9Y2R5	28S ribosomal protein S17, mitochondrial	MRPS17	MRPS17	-0.550876	-0.211885	0.338991
-0.80969	-0.844839	-0.565219	-0.848573	-0.499264	-0.759998	-0.959226	-0.518329	-0.0483311	-0.541282	-1.03859	-0.923982	-0.911944	-0.819955	-0.807853	-0.718328	-0.311512	-0.700828	-0.254679	0.195512	-0.808102	-0.128921	-0.311766	-0.554238	-1.0404	-0.180111	-0.546758	0.102715	0.0321087	-0.434738	-0.55856	-0.225668	0.211534	-0.380429	-0.236528	-0.301435	-0.360041	-0.26725	-0.886207	-0.150049	-0.337793	7519	Q9NVS2;Q9NVS2-2;Q9NVS2-3	Q9NVS2;Q9NVS2-2	28S ribosomal protein S18a, mitochondrial	MRPS18A	MRPS18A	-0.80969	-0.311639	0.498051
-0.929718	-0.259379	-0.482382	-0.7599	-0.162521	-0.614595	-0.549824	-1.42367	0.201858	-0.772636	-0.872764	-0.925946	-0.60126	-0.588225	-0.42632	-0.643572	-0.225195	-0.791632	0.341376	-0.128267	-1.33733	0.0655615	-0.867916	-0.594394	-0.764061	-0.251491	-0.504739	-0.248569	-0.0161192	-0.879857	-0.846452	-0.238065	0.0573448	-0.362815	-0.29633	-0.363494	-0.35134	-0.38716	NaN	-0.0622382	-0.424158	8412	Q9Y676	Q9Y676	28S ribosomal protein S18b, mitochondrial	MRPS18B	MRPS18B	-0.60126	-0.362815	0.238445
-0.897614	-0.756354	-0.821391	-1.01839	-0.671927	-1.11421	-0.572108	-1.04736	-0.108422	-0.756447	-0.782225	-1.12428	-1.02963	-0.823041	-0.828	-0.738506	-0.730181	-1.1136	-0.16731	-0.101772	-1.04378	-0.0893292	-0.95093	-0.833895	-1.01358	-0.486806	-1.05346	-0.430164	0.0224266	-0.505964	-0.420221	-0.513815	-0.165803	-0.488862	-0.363216	-0.330286	-0.509135	-0.399821	-1.28472	-0.114496	-0.483836	8245	Q9Y399	Q9Y399	28S ribosomal protein S2, mitochondrial	MRPS2	MRPS2	-0.823041	-0.487834	0.335207
-0.42935	-0.731133	-0.35574	-0.728441	-0.458755	-0.445613	-0.574091	-0.70124	0.117259	-0.588793	-0.865732	-1.04211	-0.706658	-0.719359	-0.754092	-0.668666	-0.45912	-0.765148	0.120533	-0.0068125	-0.812652	0.0885263	-0.792099	-0.708567	-0.461115	-0.369917	-0.610001	-0.242552	0.0715888	-0.408593	-0.28231	-0.519599	-0.0279303	-0.223774	-0.304688	-0.197506	-0.315512	-0.153885	-0.797392	0.202673	-0.34818	3147	P82650;P82650-2	P82650	28S ribosomal protein S22, mitochondrial	MRPS22	MRPS22	-0.70124	-0.331846	0.369394
-0.72529	-0.74049	-0.627083	-0.859344	-0.553817	-0.844691	-0.811686	-0.89553	-0.230094	-0.846028	-1.07103	-1.18405	-1.06765	-0.952138	-0.883696	-0.86424	-0.688506	-1.10797	-0.203143	-0.198303	-0.977207	-0.164482	-0.888757	-1.02141	-0.975046	-0.585606	-0.98588	-0.424644	-0.00275374	-0.533694	-0.432055	-0.533168	-0.462299	-0.270824	-0.497694	-0.455655	-0.557276	-0.417175	-1.10983	-0.102429	-0.60707	8269	Q9Y3D9	Q9Y3D9	28S ribosomal protein S23, mitochondrial	MRPS23	MRPS23	-0.846028	-0.533431	0.312597
NaN	-0.682658	-0.595777	NaN	0.097554	NaN	NaN	NaN	-0.302653	-0.0714613	NaN	NaN	NaN	-0.903407	NaN	NaN	-0.580507	NaN	NaN	NaN	NaN	NaN	-0.815098	NaN	NaN	NaN	NaN	NaN	NaN	-0.0515623	NaN	-0.273201	0.578891	NaN	0.205052	NaN	NaN	-0.20462	NaN	NaN	-0.548269	6098	Q96EL2	Q96EL2	28S ribosomal protein S24, mitochondrial	MRPS24	MRPS24	-0.449215	-0.238911	0.210305
NaN	-0.365776	-0.30683	-1.12731	-0.0478012	-1.1466	-0.51593	-0.579028	0.173473	-0.548389	-0.64177	-0.715925	-0.553386	-0.716702	-0.0430089	-0.690483	-0.192117	NaN	-0.0994612	0.351952	-0.491823	0.0636445	-0.603266	-0.520331	-0.494597	-0.229174	-0.480307	-0.0781714	-0.44965	-0.403678	-0.20102	0.0162667	0.092407	-0.12628	NaN	-0.584409	-0.321215	-0.0740999	-0.91722	0.0452996	-0.308656	3148	P82663;P82663-2;P82663-3	P82663;P82663-2;P82663-3	28S ribosomal protein S25, mitochondrial	MRPS25	MRPS25	-0.550887	-0.268915	0.281972
-0.203238	-0.584784	-0.60502	NaN	0.201685	NaN	0.0830161	-1.25426	0.0740724	NaN	-0.770444	-0.460861	-0.958445	-0.459109	-0.676858	-0.469519	-0.276431	-1.07248	0.156149	0.072985	-0.47478	0.173838	-0.305727	0.282245	-0.577548	-0.322865	NaN	0.176352	0.795511	-0.471556	-0.00417869	-0.672736	0.139273	-0.386165	-0.34543	NaN	-0.015122	-0.232511	0.663206	0.271005	-0.431841	6829	Q9BYN8	Q9BYN8	28S ribosomal protein S26, mitochondrial	MRPS26	MRPS26	-0.522822	-0.254471	0.268351
-0.746667	-0.766459	-0.409253	-0.90888	-0.392746	-0.714102	-0.542285	-1.06824	0.00453061	-0.572831	-0.912578	-0.881735	-1.01452	-0.643912	-0.526098	-0.65175	-0.365104	-0.779252	-0.0559586	0.0338576	-0.590453	0.147619	-0.747576	-0.534541	-0.615426	-0.446508	-0.696104	-0.270237	0.151292	-0.358027	0.00572645	-0.494846	0.118069	-0.174694	-0.428243	-0.146882	-0.449525	-0.0537725	-0.94379	-0.156187	-0.450446	5793	Q92552;Q92552-2	Q92552;Q92552-2	28S ribosomal protein S27, mitochondrial	MRPS27	MRPS27	-0.714102	-0.396673	0.317429
-0.84982	-0.780465	-0.691788	-0.834467	-0.72266	-1.03279	-0.727246	-0.973289	-0.426024	-0.749949	-1.06089	-1.12272	-1.06055	-1.04429	-0.802303	-0.925925	-0.716988	-1.1025	-0.231839	-0.0506689	-0.998586	-0.195141	-0.824664	-1.04862	-1.06126	-0.565318	-1.00863	-0.502283	0.190063	-0.695734	-0.549793	-0.594516	-0.372931	-0.458206	-0.536257	-0.366324	-0.409202	-0.294435	-1.25337	-0.29335	-0.457257	8199	Q9Y2Q9	Q9Y2Q9	28S ribosomal protein S28, mitochondrial	MRPS28	MRPS28	-0.834467	-0.543025	0.291442
-1.27442	-0.995268	-0.527568	-0.961549	-0.864209	-1.11614	-0.814769	-1.20737	-0.197866	-0.820537	-1.1349	-1.10788	-0.980278	-0.950208	-0.802998	-1.16224	-0.655921	-1.18804	-0.312904	-0.08569	-1.0331	0.183464	-0.994592	-0.985983	-0.890202	-0.400724	-0.852668	-0.308625	-0.154089	-0.635065	-0.794894	-0.529049	-0.326652	-0.512793	-0.661992	-0.527891	-0.497999	-0.43364	-1.38104	-0.180533	-0.765452	2672	P51398-2;P51398;P51398-3	P51398-2;P51398;P51398-3	28S ribosomal protein S29, mitochondrial	DAP3	DAP3	-0.961549	-0.582057	0.379492
-0.82567	-1.00236	-0.486301	-1.17646	-0.466017	-0.8804	-1.18678	-0.780001	-0.203565	-0.568183	-1.20992	-0.970298	-1.06016	-0.833745	-0.690165	-0.862672	-0.559577	-0.696261	-0.264118	0.0274893	-0.832956	-0.176958	-0.430804	-0.58488	-1.09483	-0.368194	-0.81632	-0.0224696	-0.0332327	-0.590009	-0.491634	-0.451819	0.00822892	-0.632642	-0.456358	-0.425436	-0.493498	-0.369783	-0.984775	-0.20296	-0.40893	7287	Q9NP92	Q9NP92	28S ribosomal protein S30, mitochondrial	MRPS30	MRPS30	-0.833745	-0.454089	0.379657
-0.971826	-0.55016	-0.379821	-1.05072	-0.531937	-0.925783	-0.306671	-0.784394	-0.0943563	-0.558275	-0.676201	-0.857127	-0.81466	-0.90673	-0.513077	-0.809161	-0.515482	-0.657683	-0.119721	0.0590049	-0.933914	-0.00388374	-0.747154	-0.781184	-0.837707	-0.130059	-0.740905	-0.149143	0.344851	-0.57971	-0.423224	-0.298089	-0.0903819	-0.427583	-0.417196	-0.136279	-0.355939	-0.364694	-1.30776	-0.00474136	-0.561713	5829	Q92665	Q92665	28S ribosomal protein S31, mitochondrial	MRPS31	MRPS31	-0.676201	-0.42021	0.255991
NaN	NaN	NaN	-0.676431	-0.292031	NaN	NaN	NaN	0.120554	-0.570416	NaN	NaN	NaN	NaN	-0.193308	-0.340944	-0.0167657	NaN	0.141697	NaN	NaN	0.254195	NaN	-0.422853	NaN	-0.190257	NaN	-0.165781	0.696162	0.0809261	-0.211391	NaN	0.173836	NaN	NaN	0.735909	-0.0157782	NaN	NaN	NaN	-0.0273445	8158	Q9Y291	Q9Y291	28S ribosomal protein S33, mitochondrial	MRPS33	MRPS33	-0.292031	-0.016272	0.275759
-0.503055	-0.57162	-0.427942	-0.613656	-0.168578	-0.513492	-0.370349	-0.727757	0.367061	-0.521955	-0.812392	-0.882352	-0.626729	-0.708893	-0.418299	-0.358866	-0.20493	-0.587318	0.0593907	0.322704	-0.50386	0.164797	-0.395241	-0.53424	-0.54138	-0.228594	-0.551392	-0.132359	0.258218	-0.420467	-0.108502	-0.366816	0.0948052	-0.197159	-0.37127	-0.190295	-0.032979	-0.051018	-0.669236	0.00847553	-0.152182	3156	P82930	P82930	28S ribosomal protein S34, mitochondrial	MRPS34	MRPS34	-0.521955	-0.201045	0.32091
-0.75334	-0.669067	-0.480745	-0.677087	-0.656634	-0.789532	-0.639602	-0.948317	-0.0382649	-0.710712	-0.816183	-0.85075	-0.746483	-0.705259	-0.482908	-0.798436	-0.58937	-0.864244	-0.114834	-0.0997589	-0.814377	-0.0116067	-0.893084	-0.798254	-0.811312	-0.511893	-0.820538	-0.164336	0.15454	-0.395358	-0.360742	-0.313319	-0.251509	-0.255356	-0.40501	-0.386246	-0.318119	-0.287688	-1.06603	0.0184143	-0.48031	3150	P82673;P82673-2	P82673	28S ribosomal protein S35, mitochondrial	MRPS35	MRPS35	-0.705259	-0.390802	0.314457
0.267536	0.398574	0.353967	0.631232	0.823615	0.546587	0.442694	0.165476	1.10793	1.03377	0.116791	0.00582475	0.190637	0.193536	0.244674	0.189616	1.0362	0.529117	0.385087	0.54148	0.659686	0.778807	0.533671	0.955026	-0.0115627	0.470907	0.363529	0.957478	0.701549	0.0109289	0.587987	0.397525	1.15935	-0.285752	0.987343	1.35215	0.512374	0.882688	0.180101	0.819052	0.712097	3152	P82909	P82909	28S ribosomal protein S36, mitochondrial	MRPS36	MRPS36	0.353967	0.564734	0.210767
-0.635018	-0.546788	-0.109887	-0.577679	-0.22206	-0.715271	-0.0913954	-0.870095	0.318754	-0.226285	-0.331706	-0.558495	-0.449022	-0.534037	-0.289455	-0.566923	-0.205198	-0.796128	0.28205	0.203034	-0.758138	0.120092	-0.4797	-0.413321	-0.487804	0.0648478	-0.700095	-0.130365	0.327999	-0.116318	-0.0787673	0.00451759	0.181353	-0.0984332	-0.120181	-0.0540049	0.0704604	0.395504	-0.851912	-0.116677	-0.0760133	3151	P82675;P82675-2	P82675	28S ribosomal protein S5, mitochondrial	MRPS5	MRPS5	-0.449022	-0.107376	0.341646
-0.392208	NaN	NaN	-0.446589	0.225358	NaN	-0.0393907	-0.868492	1.01287	-0.11694	-0.262735	-0.798287	-1.0538	NaN	-0.587878	0.0571187	-0.227444	NaN	-0.103072	0.406894	-0.306962	0.207898	-0.545978	-0.41826	-0.644924	0.278741	NaN	-0.128081	NaN	-0.289431	0.0379785	-0.434338	0.0704939	-0.289495	-0.242768	0.134594	0.0993726	0.0702499	-0.582531	-0.151304	-0.083955	3157	P82932	P82932	28S ribosomal protein S6, mitochondrial	MRPS6	MRPS6	-0.392208	-0.128081	0.264126
-0.936087	-0.849608	-0.708663	-1.00035	-0.919645	-0.949692	-0.802853	-1.02398	-0.166075	-0.81659	-0.931172	-0.992448	-1.17916	-0.99753	-0.790142	-1.03082	-0.545029	-1.11509	-0.393258	-0.0482218	-1.04362	-0.108243	-0.950005	-0.883105	-0.942005	-0.560292	-1.04001	-0.308685	-0.0825886	-0.778299	-0.654019	-0.525954	-0.112061	-0.524268	-0.426916	-0.371458	-0.619388	-0.324768	-1.18987	-0.194265	-0.703952	8204	Q9Y2R9	Q9Y2R9	28S ribosomal protein S7, mitochondrial	MRPS7	MRPS7	-0.931172	-0.55266	0.378512
-0.837123	-0.858221	-0.619072	-0.974254	-0.660279	-0.75316	-0.701505	-0.99947	0.00767802	-0.656938	-1.04009	-1.11304	-0.931495	-0.824098	-0.648575	-0.702546	-0.694247	-1.13262	-0.171225	-0.080519	-0.95155	-0.185218	-0.749791	-0.866025	-0.813937	-0.453172	-0.963468	-0.427013	0.105954	-0.659825	-0.668802	-0.41275	-0.305519	-0.517016	-0.541854	-0.56528	-0.492728	-0.246252	-1.12743	-0.11162	-0.503501	3158	P82933	P82933	28S ribosomal protein S9, mitochondrial	MRPS9	MRPS9	-0.824098	-0.529435	0.294662
NaN	0.525324	NaN	-0.0981094	1.27758	NaN	-0.00596217	NaN	0.188247	NaN	-0.923618	0.16475	-0.293942	NaN	NaN	0.661792	0.659334	0.25262	NaN	NaN	NaN	NaN	-0.334584	0.431908	NaN	NaN	NaN	NaN	NaN	-0.341005	NaN	NaN	0.522431	NaN	NaN	NaN	-0.537677	NaN	NaN	-0.633798	-0.534353	6425	Q96SZ5	Q96SZ5	2-aminoethanethiol dioxygenase	ADO	ADO	0.0793939	-0.0409821	-0.120376
-0.628561	-1.44701	-1.52741	-0.666183	-1.54023	-0.28402	-0.119089	-1.37607	-1.39439	-1.72911	-0.523677	-0.674393	-0.0991061	-0.456485	-0.914635	-0.264326	-1.59208	-0.694651	-0.924811	-1.75202	-0.77464	-2.20307	-0.520984	-0.686355	-0.376223	-2.60936	-1.2003	-1.90981	-2.61271	-0.336465	-1.08945	-0.0155444	-0.943704	-1.78914	-1.40832	-1.18699	-1.86477	-1.91645	-0.373888	-1.49575	-0.188858	585	O43598;O43598-2	O43598;O43598-2	2-deoxynucleoside 5-phosphate N-hydrolase 1	DNPH1	DNPH1	-0.674393	-1.13822	-0.463827
NaN	-0.962731	NaN	-0.776363	-0.250426	NaN	NaN	NaN	-0.895793	NaN	NaN	-0.959507	NaN	-0.646909	NaN	-0.304876	-0.553902	-0.337185	-0.535045	-0.0826518	-0.385387	-0.100594	-0.769583	-0.589021	NaN	-0.850828	-1.18086	0.135808	0.145268	NaN	-0.235298	-1.16488	0.131842	NaN	0.0586741	0.064999	-0.828168	-1.0451	-0.552112	0.000220957	0.359354	7924	Q9UJ83-3;Q9UJ83-4;Q9UJ83-2;Q9UJ83	Q9UJ83-3;Q9UJ83-4;Q9UJ83-2;Q9UJ83	2-hydroxyacyl-CoA lyase 1	HACL1	HACL1	-0.836078	-0.337185	0.498893
0.614532	0.739004	0.823068	0.579578	0.8924	0.204519	0.566578	0.370163	0.980195	0.795157	0.406038	0.335697	0.41029	0.449003	0.965908	0.401299	0.702348	0.72282	0.718189	1.53946	0.794366	1.06656	1.23322	0.943802	0.185073	1.03661	0.179827	0.650704	0.925262	0.593994	0.735101	0.449866	1.33643	0.56387	0.716423	0.990053	1.18719	0.996817	0.683091	0.853671	1.02241	4270	Q5HYK3	Q5HYK3	2-methoxy-6-polyprenyl-1,4-benzoquinol methylase, mitochondrial	COQ5	COQ5	0.579578	0.764733	0.185155
NaN	NaN	NaN	NaN	-0.824307	NaN	NaN	-0.855613	-0.108031	-0.823933	NaN	NaN	NaN	-1.65921	-1.175	-1.21297	NaN	NaN	NaN	-0.305425	-1.56744	NaN	-1.18749	NaN	NaN	NaN	-1.23721	NaN	0.0732211	-1.15414	-1.46591	NaN	NaN	NaN	NaN	NaN	NaN	-0.8098	NaN	NaN	-1.43514	4638	Q6PK18;Q6PK18-2	Q6PK18;Q6PK18-2	2-oxoglutarate and iron-dependent oxygenase domain-containing protein 3	OGFOD3	OGFOD3	-0.83996	-1.20023	-0.360267
0.311013	0.311507	0.879139	0.844183	0.857122	0.532894	0.908336	0.724926	1.01707	0.94698	0.61572	0.377542	0.529004	0.600743	0.544756	0.578687	0.937395	0.468153	0.718296	0.667795	0.975439	0.963847	0.88294	0.656412	0.692132	0.749228	0.603939	0.995506	0.807512	0.326896	0.756271	0.931522	0.788844	0.94106	0.816386	0.856945	0.839037	0.536037	0.709146	0.558436	0.42376	3256	Q02218;Q02218-2;Q02218-3;Q9ULD0;Q9ULD0-3;Q9ULD0-2	Q02218;Q02218-2	2-oxoglutarate dehydrogenase, mitochondrial	OGDH	OGDH	0.61572	0.752749	0.13703
0.7716	-0.676532	-1.80727	-1.43023	-0.847568	0.546131	-3.60604	-1.52304	0.319713	-0.157663	-2.00446	-3.17995	-0.411018	-2.09103	-2.45843	-0.0996276	0.172936	-2.12948	0.725697	0.576025	0.199526	-0.0730299	1.35482	-1.23811	-1.08092	-0.504385	0.363761	1.21829	1.74795	-0.491118	-0.101292	-2.07389	2.15896	-0.422423	-0.291864	0.111658	-0.774137	0.744665	0.254643	-0.0209367	1.27325	6561	Q9BQ69	Q9BQ69	O-acetyl-ADP-ribose deacetylase MACROD1	MACROD1	MACROD1	-1.43023	0.0453605	1.47559
0.163333	0.199462	0.16475	-0.181836	0.755029	0.489657	-1.59141	0.383516	0.808589	0.201857	-0.815038	-0.653209	0.107424	-0.547486	0.191118	0.39791	0.667777	0.832415	0.106411	1.12878	0.328644	0.683955	0.984456	0.210598	-0.644924	-0.816788	0.478223	1.15035	1.85251	-0.351501	0.467122	-0.666622	1.04947	-0.122536	0.937019	0.726441	0.124116	0.4757	0.678292	0.677431	0.650889	1921	P21953;P21953-2	P21953	2-oxoisovalerate dehydrogenase subunit beta, mitochondrial	BCKDHB	BCKDHB	0.16475	0.564556	0.399806
-0.00919888	-0.225895	-1.3736	-0.506142	-0.511202	-0.248794	-0.314013	-0.443333	-0.693287	-1.618	-0.374673	-0.0984021	-0.0722721	-0.535658	-0.844604	0.17596	0.054292	0.114214	-0.815392	-1.16886	-0.391567	-1.53527	-0.242233	-0.38171	-0.070245	-1.84148	-0.408609	-0.568026	-0.761329	-0.0509489	-0.236803	-0.0994118	-0.52553	-1.53	-1.32112	-0.487413	-1.53748	-1.42822	-0.595349	-0.838692	0.194914	1118	O95861;O95861-2;O95861-4;O95861-3	O95861;O95861-2;O95861-4;O95861-3	3(2),5-bisphosphate nucleotidase 1	BPNT1	BPNT1	-0.443333	-0.506472	-0.0631381
-0.209146	-0.0663049	NaN	-0.788149	-0.776309	-0.608749	-1.33494	-1.17847	-0.41758	-1.35319	NaN	-0.710564	-0.460918	-0.751411	-0.666585	-0.798686	-0.633181	-0.772218	-0.430868	0.0715675	-0.766599	-0.306314	-0.718596	-0.867968	-1.3437	-0.170802	-0.548787	-0.669712	-0.32954	0.167699	-0.472341	NaN	-0.131207	NaN	-0.448723	-0.352506	-0.669444	-0.294061	-3.68488	-3.57294	0.488884	5094	Q8IV48	Q8IV48	3-5 exoribonuclease 1	ERI1	ERI1	-0.710564	-0.510564	0.2
-0.62198	-0.755068	-0.425789	-0.902072	-0.29858	-0.525326	-1.24759	-0.682087	0.0705512	-0.553859	-1.09821	-1.06926	-0.957269	-0.830508	-0.69198	-0.680746	-0.289402	-0.661339	-0.0772883	0.370697	-0.591509	-0.0892378	0.0157381	-0.606593	-1.12719	-0.211086	-0.452131	-0.00211599	0.254267	-0.598126	-0.471757	-0.617625	0.149783	-0.488235	-0.00776205	-0.0996889	-0.269709	-0.0464599	-0.666462	-0.246787	-0.290985	6824	Q9BYD6	Q9BYD6	39S ribosomal protein L1, mitochondrial	MRPL1	MRPL1	-0.69198	-0.279555	0.412425
-0.981369	-1.19405	-0.60522	-1.09394	-0.403055	-0.87913	-1.11602	-0.590577	-0.322322	-0.355092	-0.956934	-1.15513	-1.03959	-0.77803	-0.899151	-0.880313	-0.555586	-0.832874	-0.220553	-0.0957187	-0.840376	-0.0676314	-0.352843	-0.672718	-0.95682	-0.106471	-0.729584	0.0512082	-0.0677283	-0.687156	-0.675562	-0.0955271	-0.00260016	-0.5876	-0.34543	-0.491557	-0.466759	-0.109918	NaN	-0.251148	-0.430835	4922	Q7Z7H8;Q7Z7H8-2	Q7Z7H8;Q7Z7H8-2	39S ribosomal protein L10, mitochondrial	MRPL10	MRPL10	-0.899151	-0.430835	0.468316
-0.755203	-0.911096	-0.540193	-0.834884	-0.165401	-0.720288	-0.773877	-0.568809	-0.10486	-0.27226	-0.867684	-1.01393	-0.805916	-0.740154	-0.695711	-0.669743	-0.395172	-0.701335	0.0395508	0.433917	-0.487864	-0.176371	-0.15149	-0.67335	-0.7183	-0.155668	-0.540069	0.0806802	0.212565	-0.429488	-0.296088	-0.458579	0.226109	-0.283249	-0.311607	-0.053989	-0.347943	-0.0921234	-0.594043	-0.117423	-0.496533	8253	Q9Y3B7;Q9Y3B7-2;Q9Y3B7-3	Q9Y3B7;Q9Y3B7-2;Q9Y3B7-3	39S ribosomal protein L11, mitochondrial	MRPL11	MRPL11	-0.740154	-0.303848	0.436306
-1.00335	-1.19258	-0.539984	-1.02392	-0.693132	-0.851055	-0.997638	-0.70997	-0.384994	-0.520991	-1.10873	-1.06208	-1.16976	-0.909881	-0.890459	-0.975594	-0.71896	-1.03631	-0.528259	-0.0850832	-0.773893	-0.2057	-0.546098	-0.69587	-0.914103	-0.500374	-0.817515	0.103946	-0.109747	-0.778967	-0.819431	-0.356605	-0.120692	-0.38395	-0.469298	-0.425806	-0.514238	-0.473263	-0.854864	-0.207553	-0.566896	2743	P52815	P52815	39S ribosomal protein L12, mitochondrial	MRPL12	MRPL12	-0.909881	-0.521249	0.388632
NaN	NaN	-2.55299	-2.59854	NaN	-2.92583	-3.49522	-3.27494	NaN	NaN	-1.84445	-3.39627	NaN	-3.53491	NaN	NaN	NaN	NaN	NaN	-1.38607	NaN	NaN	NaN	NaN	-2.88032	NaN	NaN	NaN	NaN	NaN	NaN	NaN	-0.41246	NaN	NaN	NaN	NaN	NaN	-1.78643	-1.83633	-1.54224	1653	P13674	P13674	Prolyl 4-hydroxylase subunit alpha-1	P4HA1	P4HA1	-3.10038	-1.66433	1.43605
-1.16817	-1.17901	-0.56892	-1.19534	-0.312838	-0.370672	-0.903013	-0.468303	-0.192302	-0.233938	-0.856528	-0.762606	-0.782682	-0.793494	-0.683311	-0.698049	-0.35171	-0.590526	-0.2112	0.349564	-0.542236	-0.128921	-0.35257	-0.527002	-1.00228	-0.276729	-0.705629	0.182282	0.278134	-0.623582	-0.404972	-0.425922	0.194018	-0.445317	-0.297814	0.00677894	-0.149242	-0.322937	-0.9487	0.0448381	-0.470053	6821	Q9BYD1	Q9BYD1	39S ribosomal protein L13, mitochondrial	MRPL13	MRPL13	-0.762606	-0.35214	0.410466
-0.911082	-1.10105	-0.571485	-1.21963	-0.494365	-0.831671	-1.33562	-0.634257	-0.267157	-0.559775	-0.910195	-1.05882	-1.16736	-0.793674	-0.786736	-0.921965	-0.745653	-0.840441	-0.2112	-0.120641	-1.03177	-0.261465	-0.488471	-0.721749	-1.06916	-0.341723	-0.885288	0.03179	0.257244	-0.65334	-0.334095	-0.545611	-0.0265255	-0.937928	-0.248884	-0.206114	-0.549997	-0.342707	-0.932404	-0.194776	-0.538811	4570	Q6P1L8	Q6P1L8	39S ribosomal protein L14, mitochondrial	MRPL14	MRPL14	-0.831671	-0.513641	0.318031
-0.655264	-0.793721	-0.478998	-0.960637	-0.44944	-0.622892	-0.873455	-0.608563	-0.0446486	-0.459032	-0.707986	-0.807972	-0.814939	-0.650198	-0.575375	-0.617699	-0.38987	-0.617984	-0.0674689	0.338461	-0.577613	-0.160744	-0.439987	-0.615856	-1.02986	-0.169898	-0.48547	0.184927	0.27045	-0.370855	-0.235466	-0.18846	0.313541	-0.500649	-0.29353	-0.0728054	-0.308539	-0.115465	-0.848447	-0.127314	-0.152484	7683	Q9P015	Q9P015	39S ribosomal protein L15, mitochondrial	MRPL15	MRPL15	-0.650198	-0.264498	0.3857
-0.724204	-0.966149	-0.336206	-0.859753	-0.295657	-0.569668	-1.11336	-0.49317	0.128697	-0.469391	-0.866496	-0.89532	-0.890806	-0.613281	-0.618304	-0.747285	-0.189677	-0.404065	-0.165229	0.28476	-0.708859	0.00512578	-0.277608	-0.406927	-0.735118	0.0340207	-0.419564	0.514418	0.137688	-0.388842	-0.351853	0.0684749	0.293779	-0.287084	-0.158113	0.00321546	-0.327142	0.0125995	-0.804558	-0.00793459	-0.0379839	7569	Q9NX20	Q9NX20	39S ribosomal protein L16, mitochondrial	MRPL16	MRPL16	-0.618304	-0.177453	0.440851
-0.770023	-0.989868	-0.670987	-1.00969	-0.597024	-0.847714	-1.1261	-0.603426	-0.319895	-1.58438	-1.13448	-1.00573	-1.12497	-0.84844	-0.933066	-0.680344	-0.596033	-0.674572	-0.403748	0.177662	-0.76969	-0.263621	-0.429636	-0.568184	-1.28458	-0.274759	-0.758961	0.0259338	-0.00221623	-0.578323	-1.0559	-0.588549	-0.0996913	-0.340167	-0.370533	-0.368252	-0.625426	-0.47699	-0.878434	-0.200315	-0.627542	7415	Q9NRX2	Q9NRX2	39S ribosomal protein L17, mitochondrial	MRPL17	MRPL17	-0.933066	-0.522587	0.410478
-0.574769	-0.853111	-0.353238	-1.10171	-0.244966	-0.741239	-1.49749	-0.595754	0.181124	-0.31268	-1.04733	-1.00121	-0.884192	-0.842372	-0.84528	-0.689951	-0.394231	-0.53189	0.000122899	0.112592	-0.70642	-0.0864934	-0.0253575	-0.435672	-0.878663	0.0012784	-0.593733	0.103843	0.204519	-0.618547	-0.764465	-0.360501	0.322591	-0.390808	-0.408187	0.10015	-0.308415	-0.0294785	-0.742685	-0.0491223	-0.227978	2560	P49406	P49406	39S ribosomal protein L19, mitochondrial	MRPL19	MRPL19	-0.842372	-0.334458	0.507914
-0.785914	-1.08186	-0.481618	-1.01854	-0.344214	-0.853637	-1.03783	-0.594871	-0.105187	-0.251353	-1.0131	-0.933266	-0.890014	-0.684717	-0.79972	-0.756277	-0.475339	-0.692783	-0.0363259	0.113496	-0.763972	-0.180554	-0.318061	-0.58594	-1.08789	-0.188174	-0.742839	0.0393231	0.169807	-0.506492	-0.369895	-0.271325	0.146393	-0.583823	-0.350361	-0.141515	-0.384533	-0.14781	-0.742231	-0.195852	-0.306066	4358	Q5T653	Q5T653	39S ribosomal protein L2, mitochondrial	MRPL2	MRPL2	-0.79972	-0.334211	0.465509
-0.979313	-1.02365	-0.57905	-0.942576	-0.532296	-1.25968	-1.353	-0.656766	-0.282446	-0.53194	NaN	-1.22569	-1.00537	-0.94238	-0.841995	-1.05423	-0.443739	NaN	0.107487	0.209783	-0.879531	0.0193614	-0.469488	-0.783174	NaN	-0.351535	-0.571204	0.0275627	0.081652	-0.88111	-0.536349	-0.856763	-0.1767	-0.396189	-0.253155	-0.496516	-0.490196	-0.412713	-0.975179	0.0195846	-0.631956	6820	Q9BYC9;Q9BYC9-2	Q9BYC9;Q9BYC9-2	39S ribosomal protein L20, mitochondrial	MRPL20	MRPL20	-0.942478	-0.456613	0.485864
-0.941804	-0.964669	-0.614304	-0.801459	-0.550152	-0.800334	-1.13225	-0.556203	-0.268338	-0.554987	-0.921009	-0.796042	-1.19214	-0.846969	-0.791542	-0.909443	-0.570549	-0.805075	-0.234814	0.0293591	-0.56992	-0.20513	-0.536441	-0.51026	-1.33246	-0.33483	-0.677737	-0.135767	-0.0322657	-0.621128	-0.453863	-0.279159	-0.0824504	-0.572936	-0.302865	-0.488598	-0.405703	-0.393098	-0.931605	-0.191195	-0.507691	4848	Q7Z2W9;Q7Z2W9-2	Q7Z2W9;Q7Z2W9-2	39S ribosomal protein L21, mitochondrial	MRPL21	MRPL21	-0.800334	-0.471231	0.329103
-1.05319	-0.844964	-0.247506	-1.148	-0.369134	-0.639731	-1.07788	-0.788438	-0.379085	-0.434069	-0.402275	-0.895668	-1.83142	-0.805048	-0.798327	-0.539599	-0.436786	-0.590709	-0.0376258	0.0642461	-0.211065	-0.210737	-0.0915392	-0.497434	-0.559847	-0.220448	-0.688611	-0.022151	0.282229	-0.843406	-1.23368	-0.455817	0.111961	0.0651285	-0.479413	-0.403149	-0.455744	0.0945017	-0.768284	-0.185422	-0.582797	7555	Q9NWU5;Q9NWU5-3;Q9NWU5-2	Q9NWU5;Q9NWU5-3;Q9NWU5-2	39S ribosomal protein L22, mitochondrial	MRPL22	MRPL22	-0.798327	-0.419968	0.378359
NaN	-0.976967	-0.924583	NaN	-1.17471	-0.927121	-1.6292	-0.696265	-0.0336356	-0.909868	-0.691318	-1.38503	-1.22002	-0.784471	0.531951	-0.833241	-0.602767	-0.696007	-0.434539	-0.173404	-0.874225	-0.14841	0.200376	-0.824372	-1.35975	-0.543222	-0.791956	-0.150331	-0.163975	-0.87494	-0.700938	-0.542984	0.295197	-0.582091	NaN	-0.290252	-0.40582	-0.244961	-1.02593	-0.306811	-0.381781	4029	Q16540	Q16540	39S ribosomal protein L23, mitochondrial	MRPL23	MRPL23	-0.924583	-0.542984	0.381599
-0.761926	-0.959245	-0.643167	-0.937868	-0.423213	-0.601757	-1.44492	-0.587919	-0.172359	-0.626063	-0.972116	-1.06185	-0.991401	-1.11391	-0.847017	-0.871815	-0.720086	-0.80742	-0.50844	-0.0745509	-0.925606	-0.352998	-0.386988	-0.720185	-0.992165	-0.228449	-0.840108	0.0381609	-0.0775165	-0.671051	-0.504425	-0.527871	0.194672	-0.476318	-0.320541	-0.29673	-0.399853	-0.42458	-0.502329	-0.104263	-0.642827	5951	Q96A35	Q96A35	39S ribosomal protein L24, mitochondrial	MRPL24	MRPL24	-0.847017	-0.489324	0.357693
0.0199296	NaN	NaN	NaN	-0.222352	NaN	-0.645352	NaN	0.111148	-0.504106	-0.655982	-0.963833	-0.416404	NaN	NaN	-0.59706	-0.275536	-0.280827	0.221875	NaN	-0.568098	-0.0234718	NaN	-0.431883	NaN	-0.293513	-0.155577	0.341142	0.269546	-0.413213	-0.231951	NaN	0.331953	NaN	-0.350111	0.248315	-0.0544734	0.546045	NaN	0.333044	0.410324	7698	Q9P0M9	Q9P0M9	39S ribosomal protein L27, mitochondrial	MRPL27	MRPL27	-0.460255	-0.105025	0.35523
-0.700935	-0.843643	-0.241978	-0.837383	-0.462891	-0.72052	-1.17172	-0.524131	-0.0664824	-0.426955	-0.977453	-0.829798	-1.0196	-0.542445	-0.5718	-0.905092	-0.332182	-0.707146	-0.277535	0.175751	-0.353846	-0.153825	-0.249986	-0.557197	-1.17314	-0.216652	-0.563103	0.144077	0.217828	-0.115274	-0.519254	-0.130238	0.258384	-0.326182	-0.405805	-0.0224552	-0.429561	-0.149608	-0.841492	-0.133864	-0.489653	3491	Q13084	Q13084	39S ribosomal protein L28, mitochondrial	MRPL28	MRPL28	-0.700935	-0.301858	0.399077
NaN	-1.26398	-0.85782	-1.05789	-0.655418	-0.942474	-1.32072	-0.612436	-0.126825	-0.455899	-0.996436	-1.34475	-1.31249	-1.19149	NaN	-0.912142	-0.488955	NaN	-0.389797	-0.0887935	-0.901338	-0.250072	-0.723214	-0.466231	-1.51788	-0.331848	-0.865884	0.170563	-0.0665314	-0.621251	-0.654939	-0.435426	0.0584165	-0.598475	-0.290636	-0.494039	-0.552005	-0.501942	NaN	-0.0832863	-0.74041	1464	P09001	P09001	39S ribosomal protein L3, mitochondrial	MRPL3	MRPL3	-0.996436	-0.491497	0.504939
NaN	-0.851236	NaN	-1.01043	-0.551454	NaN	NaN	-0.55129	0.170547	NaN	NaN	-1.20632	NaN	-0.571271	NaN	-0.627929	-0.399283	NaN	0.056423	0.777331	-0.0972249	NaN	NaN	NaN	-0.833699	-0.152928	-0.334713	-0.0107759	0.498808	NaN	NaN	NaN	0.330848	-0.559588	-0.184204	-0.208829	-0.124245	NaN	NaN	NaN	0.120318	5579	Q8TCC3;Q8TCC3-2;Q8TCC3-3	Q8TCC3;Q8TCC3-2;Q8TCC3-3	39S ribosomal protein L30, mitochondrial	MRPL30	MRPL30	-0.571271	-0.138587	0.432684
NaN	NaN	-0.386129	-0.760869	0.778536	-0.551067	-0.871031	-0.845455	0.264761	-0.212061	-0.790322	NaN	-0.763591	-0.880256	-0.826144	-0.756405	-0.363301	-0.804057	0.0558778	0.0795776	NaN	NaN	-0.255667	-0.560641	NaN	0.00387632	-0.531785	NaN	0.10884	-0.453935	-0.232789	-0.0665158	0.0289147	NaN	NaN	0.267629	0.172925	-0.0406032	NaN	0.240329	-0.223809	6819	Q9BYC8	Q9BYC8	39S ribosomal protein L32, mitochondrial	MRPL32	MRPL32	-0.76223	-0.0665158	0.695714
NaN	-1.06614	-0.28849	-1.07918	-0.442227	NaN	-0.334766	-0.643714	-0.0425406	-0.377366	-0.826883	-0.981088	-0.895988	-0.569374	-0.856246	-0.722382	-0.491267	-1.02164	-0.268656	0.0960079	-1.12559	0.031301	-0.635278	-0.546812	-1.15578	-0.00767542	-1.00856	0.207297	-0.0450814	-0.568964	-0.393715	-0.00469973	0.0298777	-0.598791	-0.317542	-0.236417	-0.243582	0.127365	NaN	-0.267067	-0.33659	824	O75394	O75394	39S ribosomal protein L33, mitochondrial	MRPL33	MRPL33	-0.643714	-0.317542	0.326171
-0.754227	-0.946129	-0.392293	-0.958202	-0.431026	-0.874466	-1.19178	-0.677413	-0.039254	-0.508104	-0.922641	-0.947793	-0.951628	-0.759726	-0.904175	-0.826482	-0.521419	-0.603735	-0.381795	0.142073	-0.659187	-0.279795	-0.443593	-0.678478	-1.05844	-0.183849	-0.657965	0.0106226	-0.0154753	-0.823945	-0.701194	-0.328748	0.120999	-0.585553	-0.494901	-0.235716	-0.442028	-0.331826	-0.982227	-0.118418	-0.370967	6845	Q9BZE1	Q9BZE1	39S ribosomal protein L37, mitochondrial	MRPL37	MRPL37	-0.874466	-0.44281	0.431656
-0.636844	-0.920171	-0.523547	-0.95309	-0.398887	-0.801333	-1.00406	-0.567783	-0.137598	-0.479372	-1.08719	-1.00759	-0.964729	-0.762395	-0.794839	-0.614646	-0.376587	-0.799745	-0.174685	0.136189	-0.638267	-0.224659	-0.296411	-0.548896	-1.0478	-0.179962	-0.769717	0.0553292	0.0253694	-0.519235	-0.403759	-0.247262	0.170452	-0.352333	-0.333476	-0.0699103	-0.267271	-0.270423	-0.73722	-0.175964	-0.361262	6076	Q96DV4;Q96DV4-2	Q96DV4;Q96DV4-2	39S ribosomal protein L38, mitochondrial	MRPL38	MRPL38	-0.794839	-0.314943	0.479895
-0.760601	-1.13056	-0.600507	-1.02834	-0.324097	-0.748814	-1.33652	-0.878085	-0.186718	-0.288734	-1.05098	-0.968891	-0.987785	-0.755667	-0.90946	-0.880552	-0.483104	-0.769973	-0.142515	-0.0356451	-0.879097	-0.029595	-0.174929	-0.535743	-1.2971	-0.166277	-0.639447	0.24057	0.0433871	-0.712406	-0.439652	-0.419819	-0.0225779	-0.936377	-0.529847	-0.335675	-0.41988	-0.399127	-0.825507	-0.129952	-0.384893	7624	Q9NYK5;Q9NYK5-2	Q9NYK5;Q9NYK5-2	39S ribosomal protein L39, mitochondrial	MRPL39	MRPL39	-0.878085	-0.419849	0.458236
-0.884184	-1.17308	-0.601511	-1.07645	-0.70989	-0.818219	-1.30708	-0.804295	-0.252614	-0.509077	-1.11611	-1.106	-1.11392	-0.934427	-0.949294	-1.0885	-0.683895	-0.838152	-0.412094	-0.0245148	-0.790313	-0.166854	-0.553182	-0.757649	-1.16594	-0.481518	-0.793254	0.132433	-0.0690449	-0.872633	-0.373141	-0.64126	-0.094653	-0.48096	-0.523042	-0.522688	-0.454164	-0.361608	-0.658589	-0.185938	-0.591648	6823	Q9BYD3;Q9BYD3-2	Q9BYD3;Q9BYD3-2	39S ribosomal protein L4, mitochondrial	MRPL4	MRPL4	-0.934427	-0.522865	0.411562
-0.540628	-0.612976	-0.247762	-0.803849	-0.290074	-0.615091	-0.683273	-0.456688	-0.0367119	-0.415952	-0.803269	-0.643331	-0.701752	-0.45397	-0.40458	-0.584954	-0.30301	-0.566981	0.0641619	0.287625	-0.0736653	-0.0251278	-0.281759	-0.55157	-0.674426	-0.0386253	-0.621414	0.187247	0.170027	-0.42158	-0.364316	-0.0217394	0.256627	-0.0478187	-0.279075	-0.120294	-0.187849	-0.0124266	-0.53305	0.0367486	-0.482257	7322	Q9NQ50	Q9NQ50	39S ribosomal protein L40, mitochondrial	MRPL40	MRPL40	-0.540628	-0.154071	0.386556
-0.826008	-0.669867	-0.510669	-0.987065	-0.252575	-0.75624	-1.5944	-0.415031	-0.252912	-0.484732	NaN	-0.765383	-1.05475	-0.655961	-0.772527	-1.14394	-0.569716	-0.656027	-0.326253	-0.0948185	-0.810925	0.0623988	-0.334308	-0.801527	-1.06711	-0.160375	-0.878443	0.0588735	-0.0514277	-0.380587	-0.522375	-0.376485	0.171429	-0.54283	-0.328727	-0.345223	0.282294	-0.36149	-0.77408	-0.206826	-0.622561	5159	Q8IXM3	Q8IXM3	39S ribosomal protein L41, mitochondrial	MRPL41	MRPL41	-0.713053	-0.368987	0.344066
-0.790509	-0.985508	-0.485866	-1.01701	-0.448809	-0.644128	-0.976764	-0.758548	-0.17893	-0.497941	-0.975807	-0.774727	-0.96932	-0.636492	-0.460225	-1.18146	-0.507456	-0.804292	0.0265394	0.649314	-0.632118	-0.0409651	-0.203469	-0.734027	-1.18506	-0.0730483	-0.761202	0.131065	0.242978	-0.444228	-0.526904	-0.333367	-0.00962133	-0.308762	-0.39197	-0.111909	-0.409901	-0.22912	-0.75563	-0.024347	-0.286155	5373	Q8N983-4	Q8N983-4	39S ribosomal protein L43, mitochondrial	MRPL43	MRPL43	-0.758548	-0.321065	0.437483
-0.81319	-0.884552	-0.408565	-0.871735	-0.544579	-0.818549	-1.0547	-0.667665	-0.223731	-0.6354	-0.913071	-0.894185	-1.28877	-0.706408	-0.790642	-0.903443	-0.602257	-0.707735	-0.334989	0.0542928	-0.702411	-0.168968	-0.483214	-0.695072	-0.86039	-0.229899	-0.660285	0.0343918	0.0260853	-0.803587	-0.444699	-0.487321	0.129062	-0.445896	-0.441037	-0.309601	-0.442825	-0.217055	-0.916008	-0.0834159	-0.49581	7168	Q9H9J2	Q9H9J2	39S ribosomal protein L44, mitochondrial	MRPL44	MRPL44	-0.81319	-0.445297	0.367892
-0.603825	-0.760069	-0.371014	-1.0313	-0.194359	-0.417469	-0.536065	-1.01862	-0.105465	-0.345025	-0.985576	-0.911622	-0.379276	-0.681118	-0.729195	-0.695796	-0.319345	-0.584471	0.0890048	0.115945	-0.697605	-0.160914	-0.401204	-0.526296	-0.761906	-0.329675	-0.557164	0.220832	0.350028	-0.561334	-0.673745	-0.292364	0.0922584	-0.297191	-0.312125	-0.248008	-0.422421	-0.06193	-1.10905	0.00776286	-0.243265	6592	Q9BRJ2	Q9BRJ2	39S ribosomal protein L45, mitochondrial	MRPL45	MRPL45	-0.603825	-0.315735	0.288091
-0.503581	-0.68431	-0.436409	-0.670518	-0.262142	-0.631518	-0.876871	-0.563161	0.101585	-0.591267	-0.83672	-0.884287	-0.863807	-0.649003	-0.646818	-0.522705	-0.277069	-0.671124	-0.226703	0.27721	-0.451746	-0.0137744	-0.258717	-0.537045	-0.915368	-0.25449	-0.709593	0.143226	0.261125	-0.398607	-0.138885	-0.488828	0.449013	-0.232363	-0.0100022	-0.121762	-0.176142	-0.153747	-0.513845	-0.046285	0.0475237	7016	Q9H2W6	Q9H2W6	39S ribosomal protein L46, mitochondrial	MRPL46	MRPL46	-0.646818	-0.229533	0.417284
-0.832249	-0.829525	-0.533789	-1.03101	-0.501707	-0.828946	-1.19385	-0.567014	-0.0522756	-0.625528	-1.04375	-1.07948	-1.00845	-0.91649	-0.796932	-0.861828	-0.66774	-0.805622	-0.51796	0.122395	-0.76322	-0.270748	-0.503638	-0.755111	-1.07158	-0.253491	-0.792443	-0.0115008	-0.153963	-0.693858	-0.525207	-0.316316	0.0233974	-0.542365	-0.304514	-0.332654	-0.597442	-0.29456	-0.86678	-0.170786	-0.587796	7263	Q9HD33-2;Q9HD33;Q9HD33-3	Q9HD33-2;Q9HD33;Q9HD33-3	39S ribosomal protein L47, mitochondrial	MRPL47	MRPL47	-0.829525	-0.521583	0.307941
-0.0695764	NaN	NaN	NaN	-0.189595	-0.761703	-0.985679	-0.631545	0.258283	0.246236	-0.732805	-0.938012	-0.809736	-0.494683	-0.589134	-0.85905	-0.533646	-0.620493	-0.171328	0.335546	-0.707591	0.228935	NaN	-0.186968	-0.588699	-0.00623555	-1.01715	0.238091	0.193025	NaN	-0.391118	NaN	0.0814854	-0.209877	-0.198935	-0.239498	-0.229551	-0.107044	NaN	-0.154225	-0.285049	6154	Q96GC5-3;Q96GC5	Q96GC5-3;Q96GC5	39S ribosomal protein L48, mitochondrial	MRPL48	MRPL48	-0.61034	-0.204406	0.405934
-0.700107	-0.940738	-0.407761	-0.944731	-0.381974	-0.511775	-1.03599	-0.758319	-0.0683749	-0.573852	-1.0975	-1.21697	-0.921968	-0.586768	-0.83511	-0.966636	-0.502771	-0.623177	-0.39941	0.180569	-0.905012	-0.087775	-0.300653	-0.773775	-1.08258	-0.249202	-0.645947	0.100154	0.105392	-0.597752	-0.70528	-0.537423	0.127997	-0.418871	-0.283766	-0.386626	-0.414202	-0.125988	-0.762464	0.0314511	-0.332573	3558	Q13405	Q13405	39S ribosomal protein L49, mitochondrial	MRPL49	MRPL49	-0.758319	-0.406806	0.351513
NaN	-1.01006	-0.529047	-0.921614	0.670784	-0.540325	-1.33902	-0.85065	-0.241244	-0.388792	-0.692955	-0.883408	NaN	-0.699215	-1.03606	-0.742643	-0.512775	-0.715609	-0.228196	0.34826	-0.624085	-0.413336	-0.385119	-0.776194	-0.947455	-0.334695	-0.725166	NaN	0.21743	-0.453662	-0.0535905	-0.154808	0.227203	NaN	-0.0899804	0.0621504	-0.383822	-0.591096	-0.567656	NaN	-0.404076	5331	Q8N5N7;Q8N5N7-2	Q8N5N7;Q8N5N7-2	39S ribosomal protein L50, mitochondrial	MRPL50	MRPL50	-0.699215	-0.404076	0.295139
NaN	-0.71262	NaN	NaN	NaN	NaN	-0.595293	NaN	0.00467433	NaN	NaN	NaN	-0.788549	NaN	-0.565089	NaN	-0.491267	NaN	-0.142079	0.0228884	-0.462962	NaN	-0.410828	-0.321773	NaN	-0.160679	NaN	0.139299	0.108382	NaN	-0.25657	0.119085	0.206147	NaN	NaN	-0.0362639	-0.336968	-0.138649	NaN	NaN	-0.252618	4946	Q86TS9-3;Q86TS9;Q86TS9-2	Q86TS9-3;Q86TS9;Q86TS9-2	39S ribosomal protein L52, mitochondrial	MRPL52	MRPL52	-0.595293	-0.151379	0.443914
-0.751919	-0.85847	-0.262567	-0.870761	-0.323139	-0.726218	-0.862025	-0.888891	0.0605533	-0.334218	-0.670342	-0.803231	-1.0527	-0.659229	NaN	-0.900259	-0.28598	-0.500182	-0.268656	0.37301	-1.02392	-0.221457	-0.0605556	-0.268818	-0.579891	-0.0264552	-0.506333	0.128439	0.192354	-0.538356	-0.813449	-0.201976	0.915382	-0.532414	-0.4333	-0.102389	-0.0985249	-0.205815	NaN	-0.232593	-0.167197	6099	Q96EL3	Q96EL3	39S ribosomal protein L53, mitochondrial	MRPL53	MRPL53	-0.739068	-0.232593	0.506475
-0.49515	-0.876369	-0.105221	-0.798208	-0.235873	-0.498379	-0.871887	-0.269452	-0.0182848	-0.0819082	-0.956218	-0.614766	-0.533693	-0.506418	-0.380303	-0.493786	-0.0983286	-0.587593	NaN	0.439406	NaN	-0.025517	-0.0789173	-0.562702	-0.271956	0.0664631	-0.725932	0.0230649	0.165005	-0.218397	-0.130753	-0.218645	0.588258	-0.363048	NaN	0.0387801	-0.105715	0.0889991	NaN	-0.125961	-0.289882	4563	Q6P161	Q6P161	39S ribosomal protein L54, mitochondrial	MRPL54	MRPL54	-0.498379	-0.115838	0.382541
NaN	-0.962959	-0.419425	-4.23131	-0.239488	-0.715154	-0.918259	-5.39564	-0.145654	-0.508104	-4.01836	-1.27288	-0.616446	-0.740808	-0.26411	-0.723166	-0.701392	-0.718612	-0.342287	0.306686	-0.834747	0.0457968	-0.412141	-0.525186	-0.823313	-0.143913	-0.69758	0.213042	0.32235	-0.480697	-0.155018	-0.236498	0.207307	-0.208629	-0.30798	-0.202103	-0.314891	-0.0656756	-0.26394	0.0252745	-0.351096	4919	Q7Z7F7;Q7Z7F7-2	Q7Z7F7;Q7Z7F7-2	39S ribosomal protein L55, mitochondrial	MRPL55	MRPL55	-0.727981	-0.28596	0.442021
-0.456282	-0.438345	-0.311502	-0.80402	-1.16715	-0.926401	-1.24724	-0.872976	-0.738299	-1.02172	-1.08603	-1.01642	-0.985809	-1.05045	-0.569836	-1.3063	-0.9838	-1.66723	-0.842441	-0.069547	-0.533806	-0.307566	-1.34252	-0.855402	-0.886509	-0.245332	-0.528261	-0.115932	-0.433399	-1.25733	-1.56446	-0.0772322	-0.827725	0.202881	-0.681577	-1.12984	-0.33868	-0.712451	-0.582126	-0.0273284	-1.35061	3883	Q15125	Q15125	3-beta-hydroxysteroid-Delta(8),Delta(7)-isomerase	EBP	EBP	-0.926401	-0.697014	0.229387
0.721776	0.71158	0.631451	0.266808	0.406983	0.328353	0.241696	-0.0105118	0.505792	0.544145	0.167537	0.278451	0.225974	0.24439	0.462675	0.275362	0.513655	1.06737	0.71299	1.06019	0.455362	0.81189	0.768047	0.478918	0.359204	0.621503	-0.0335334	0.780147	0.699181	0.13217	0.13959	0.119693	0.804161	0.561994	0.613114	0.52573	0.808298	1.35216	0.518039	0.960858	0.674152	6504	Q99714;Q99714-2	Q99714;Q99714-2	3-hydroxyacyl-CoA dehydrogenase type-2	HSD17B10	HSD17B10	0.328353	0.617309	0.288956
NaN	1.15143	NaN	1.09094	2.18394	0.68727	NaN	1.11601	1.36571	NaN	NaN	0.100957	1.07149	NaN	NaN	2.83411	-0.718491	NaN	1.75961	NaN	NaN	NaN	0.0642333	1.89455	0.513955	NaN	NaN	NaN	NaN	0.948437	1.75778	0.991563	2.11994	NaN	NaN	2.58355	NaN	NaN	NaN	NaN	1.62552	2496	P46952;P46952-2	P46952	3-hydroxyanthranilate 3,4-dioxygenase	HAAO	HAAO	1.10347	1.69165	0.588175
2.39495	-0.269125	NaN	NaN	0.986542	0.385628	NaN	NaN	NaN	NaN	1.30606	0.489191	NaN	NaN	NaN	0.736608	1.23419	0.855343	NaN	NaN	1.21536	NaN	1.99245	0.00562724	-2.65066	0.239712	1.59331	NaN	2.07597	1.77461	0.657151	NaN	1.78674	-0.443288	NaN	NaN	NaN	NaN	0.296693	-0.468938	3.09075	6704	Q9BUT1;Q9BUT1-3;Q9BUT1-2	Q9BUT1;Q9BUT1-3;Q9BUT1-2	3-hydroxybutyrate dehydrogenase type 2	BDH2	BDH2	0.737867	0.855343	0.117477
0.734517	0.659884	0.301083	0.106925	1.10543	0.807763	-0.0827747	-0.300937	1.03539	0.607063	-0.124695	0.157452	0.321387	-0.0144744	0.90312	0.22137	0.890158	0.699346	0.991251	1.4414	0.817404	0.931675	1.51457	0.966061	-0.133452	0.329293	0.635452	0.858421	1.49076	0.275514	0.965112	0.0562663	1.64909	0.453149	1.38381	0.83748	0.78901	0.848981	0.820128	0.75406	1.40807	2203	P31937	P31937	3-hydroxyisobutyrate dehydrogenase, mitochondrial	HIBADH	HIBADH	0.321387	0.84323	0.521843
0.929277	1.4043	0.80201	0.372164	0.991585	1.09043	0.0221041	0.38221	1.67126	0.839573	0.20562	0.0816845	0.6813	0.23126	1.24735	0.150342	1.39199	0.93495	1.5106	1.80116	1.06861	1.53179	1.85451	1.33981	-0.00590808	0.563783	0.149833	1.0177	1.84804	0.797335	0.830305	0.173232	2.10383	0.842378	1.42439	1.3903	1.56731	1.76452	0.96205	1.20972	1.62238	4545	Q6NVY1;Q6NVY1-2	Q6NVY1;Q6NVY1-2	3-hydroxyisobutyryl-CoA hydrolase, mitochondrial	HIBCH	HIBCH	0.80201	1.27477	0.472757
1.68271	1.45915	1.82481	0.987309	2.37085	1.00827	1.43027	1.38271	1.9557	1.63681	1.17133	1.17932	1.15025	1.25497	1.62387	1.15209	1.81067	0.915026	1.6475	1.80318	1.96932	1.49024	1.94303	0.82808	1.40492	1.84092	1.07661	-0.198428	2.34689	1.61972	1.91098	0.827135	1.29295	1.18834	2.12812	2.21599	2.17937	2.16572	1.50139	1.45279	-1.49471	2426	P42765	P42765	3-ketoacyl-CoA thiolase, mitochondrial	ACAA2	ACAA2	1.43027	1.56055	0.130282
0.89767	1.415	0.971858	1.43527	0.916937	-0.27673	-0.131098	0.837808	0.863901	1.41574	0.923123	0.157071	0.557854	0.949517	0.832016	0.588875	0.76226	0.308102	0.966305	0.738729	0.884422	0.908634	0.0712458	1.03823	0.454048	1.42047	0.207389	-0.0947237	0.249706	0.762136	0.577685	1.25684	0.436385	1.48309	0.385259	0.53322	1.40787	1.19297	0.334981	0.769658	1.06394	1469	P09110;P09110-2	P09110;P09110-2	3-ketoacyl-CoA thiolase, peroxisomal	ACAA1	ACAA1	0.89767	0.750433	-0.147237
NaN	0.785791	0.579851	0.362115	-0.131877	NaN	NaN	0.489958	2.07914	0.19358	-0.364208	NaN	0.742331	NaN	0.147425	0.861596	1.17931	0.791593	1.17541	0.823305	0.804167	NaN	0.969192	1.81482	0.157778	1.29592	1.18039	0.736929	1.03428	-0.10563	-0.164152	NaN	1.85791	0.86908	-0.180637	1.77632	1.22148	1.10262	0.442235	1.46404	0.562594	3331	Q06136;Q06136-2	Q06136;Q06136-2	3-ketodihydrosphingosine reductase	KDSR	KDSR	0.426037	0.919136	0.493099
NaN	NaN	NaN	-1.07631	NaN	NaN	NaN	-1.20528	-0.815911	NaN	NaN	-0.946532	NaN	NaN	-1.22971	NaN	-1.32289	NaN	-1.44151	-0.359943	-1.45561	-0.281081	NaN	NaN	NaN	-0.538361	-1.5374	NaN	-0.330853	-0.962907	-2.09686	NaN	-0.700615	NaN	-1.59107	-0.95699	-0.569328	-0.614911	NaN	-0.112934	-1.17357	2883	P56937-3;P56937-2;P56937	P56937-3;P56937-2;P56937	3-keto-steroid reductase	HSD17B7	HSD17B7	-1.07631	-0.95699	0.119325
1.30397	1.34976	0.0982422	0.232837	1.12827	0.279994	0.41406	0.184393	0.700317	0.226928	0.399584	0.753773	0.583623	0.337269	0.0100556	0.357226	0.935443	1.48206	0.693382	0.211644	0.140293	-0.0278493	0.110847	1.06892	-0.239007	0.263709	0.592726	-0.0222307	1.01713	0.306131	0.560654	0.640575	0.713647	0.193861	0.00757901	0.283568	0.148376	0.536561	0.791208	0.612991	1.66447	2012	P25325-2;Q07001-2;Q07001	P25325-2	3-mercaptopyruvate sulfurtransferase	MPST	MPST	0.399584	0.446894	0.0473098
0.86535	0.479846	0.161478	0.163978	1.03135	0.307042	NaN	-0.276654	0.467713	0.168925	-0.0751783	-0.211207	0.0568835	-0.151931	0.407367	0.083211	0.738694	0.152338	1.21713	1.59067	0.848327	0.75069	1.12231	-0.0376923	-0.336177	-0.211819	0.378197	0.899427	1.0458	0.327113	0.391057	-0.113539	1.63462	0.717899	1.15275	0.820634	0.137717	0.404644	0.498498	0.817576	1.13158	7553	Q9NWU1;Q9NWU1-2	Q9NWU1;Q9NWU1-2	3-oxoacyl-[acyl-carrier-protein] synthase, mitochondrial	OXSM	OXSM	0.166452	0.728296	0.561845
-0.51572	-0.440717	0.14577	1.19644	0.529108	0.318314	0.561163	0.72616	-0.305396	0.121733	NaN	0.693651	1.05002	0.438405	0.239089	0.62919	-0.0725163	0.918149	-0.4701	-1.06915	0.166088	NaN	-0.131256	-0.425253	0.709776	-0.354079	-0.330992	-0.379658	-1.33471	0.705283	0.306171	0.411969	-0.654475	-0.149148	NaN	-0.216378	-0.154106	-0.394376	0.642617	NaN	-0.73743	504	O15530;O15530-2;O15530-3;O15530-4;O15530-5;Q6A1A2	O15530;O15530-2;O15530-3;O15530-4;O15530-5;Q6A1A2	3-phosphoinositide-dependent protein kinase 1;Putative 3-phosphoinositide-dependent protein kinase 2	PDPK1;PDPK2	PDPK1	0.378359	-0.154106	-0.532466
5.42267	0.316496	1.30285	0.207952	2.45604	1.99318	3.42549	2.06602	NaN	2.94088	NaN	NaN	2.68249	2.2324	1.25167	1.72279	3.77429	4.66277	3.36263	NaN	3.60343	3.61693	2.74995	NaN	2.31845	NaN	2.34256	4.36933	2.59799	NaN	2.42688	1.51017	4.99305	4.15449	3.83651	3.32328	NaN	NaN	5.12705	3.58355	NaN	1235	P02730;P02730-2	P02730;P02730-2	Band 3 anion transport protein	SLC4A1	SLC4A1	2.14921	3.58355	1.43434
-1.14252	-1.91873	-3.21928	-3.45376	-1.87654	-3.45642	-4.41207	-2.69378	-0.616066	-2.62873	-2.7177	-3.43877	-2.91322	-1.5062	-2.99459	-2.09238	-0.332305	-2.54306	-1.2589	-0.825562	-2.2531	-0.339674	-2.79687	-2.53764	-3.71772	-1.76496	-0.0471201	0.154231	-0.672387	-3.00085	-0.560086	-3.46266	-0.422345	-1.69892	-0.339637	-0.22629	-2.45579	-1.33862	-1.2402	-0.829784	-1.66225	3243	Q01826;Q01826-2	Q01826;Q01826-2	DNA-binding protein SATB1	SATB1	SATB1	-2.7177	-1.29876	1.41894
-3.03572	NaN	NaN	NaN	-5.26165	-3.35787	-7.2519	-5.44099	NaN	-4.21107	-5.28761	NaN	-4.03777	-4.81958	-4.45607	NaN	-4.31645	-2.97323	NaN	-2.56359	-4.70681	-3.15758	-2.06102	-4.03132	-2.56141	NaN	NaN	-2.43674	-2.9158	-6.74934	NaN	NaN	-4.58515	-2.4954	-3.39432	-4.35364	-5.53812	NaN	NaN	-2.02077	-3.72408	328	O00767	O00767	Acyl-CoA desaturase	SCD	SCD	-4.63783	-3.27595	1.36187
-1.57942	-1.2588	-2.80742	-2.04542	-1.11363	-1.26119	-2.65083	-2.55808	-0.00247059	-1.18596	-2.38284	-2.36773	-2.38042	-2.78753	-2.76879	-1.61333	-0.626489	-2.35022	-0.831118	-0.345399	-1.8883	-1.04841	-0.754001	-2.27301	-2.9673	-1.36281	-0.956493	-0.0139936	-0.293106	-1.93412	-0.593054	-2.15672	-0.636608	-1.53609	-0.177736	-0.303984	-1.45931	-1.37582	-1.05084	-0.474853	-1.30003	4653	Q6UB35;Q6UB35-2	Q6UB35	Monofunctional C1-tetrahydrofolate synthase, mitochondrial	MTHFD1L	MTHFD1L	-2.36773	-1.04963	1.3181
NaN	NaN	2.226	NaN	NaN	3.28801	NaN	NaN	NaN	NaN	NaN	3.40696	0.786067	NaN	1.47313	NaN	NaN	NaN	3.97236	NaN	NaN	NaN	4.61588	NaN	3.2316	NaN	NaN	3.50986	NaN	NaN	NaN	NaN	3.07148	NaN	2.90559	NaN	NaN	NaN	NaN	NaN	4.67342	1481	P09493-3;P09493-10	P09493-3;P09493-10	Tropomyosin alpha-1 chain	TPM1	TPM1	2.226	3.50986	1.28386
2.83842	1.73346	NaN	-0.455541	1.8121	0.229676	0.221986	-0.308603	0.933903	-1.06071	NaN	NaN	0.906773	-0.257472	1.50811	-0.0616541	1.98108	1.3994	2.3006	2.04995	1.66814	1.78472	1.8396	NaN	0.151262	-0.518402	-0.432325	2.24901	3.82935	NaN	1.6927	NaN	3.35492	0.968007	2.83523	2.66323	0.0886303	2.49088	1.67908	2.31769	2.56658	4236	Q56VL3;Q56VL3-2	Q56VL3	OCIA domain-containing protein 2	OCIAD2	OCIAD2	0.568225	1.8396	1.27137
NaN	-0.461428	NaN	-1.76697	-0.877606	NaN	-4.23098	NaN	0.482072	-1.4256	-2.5872	-1.9822	-0.795239	-1.75125	-1.11461	-0.606852	-0.181921	0.99997	-1.57359	-0.506495	-0.0023402	-0.318698	-0.676175	NaN	-1.55863	-1.8617	-0.785289	-0.55192	0.662709	NaN	0.275546	NaN	0.497127	-0.596574	-0.153476	1.00625	NaN	-0.182387	0.319121	-0.0641615	-0.0417356	1550	P10415-2;P10415	P10415-2;P10415	Apoptosis regulator Bcl-2	BCL2	BCL2	-1.4256	-0.182154	1.24344
NaN	NaN	3.06889	2.18712	4.26327	2.42382	NaN	0.871508	2.63955	NaN	1.13363	2.20535	3.21232	2.48304	4.3618	1.65742	3.16382	NaN	3.97041	5.99439	4.29934	3.33108	4.49138	NaN	NaN	2.60303	3.48859	NaN	3.13616	3.16938	5.5674	NaN	NaN	5.38593	4.57147	4.14572	3.90627	3.20578	NaN	NaN	1.25863	3377	Q08380	Q08380	Galectin-3-binding protein	LGALS3BP	LGALS3BP	2.48304	3.69743	1.21438
-1.06367	-1.40512	-2.47963	-2.01143	-0.26669	-1.37569	-2.1923	-1.93079	-0.431629	-1.24516	-2.68876	-2.58533	-1.8217	-3.18612	-1.31979	-1.25205	-0.82689	-0.61475	-0.661344	-0.343977	-1.37367	-0.600225	-0.321965	-0.157225	-2.38926	-2.25985	-0.326695	-0.366598	-0.0621648	-2.10506	-0.453568	-1.24934	-0.0110885	-0.614626	0.258202	-0.375041	-2.13023	-1.06613	-0.828597	-0.321866	-0.864262	5655	Q8WTT2	Q8WTT2	Nucleolar complex protein 3 homolog	NOC3L	NOC3L	-1.8217	-0.614688	1.20701
NaN	-0.0755928	0.53979	0.952798	2.42172	NaN	0.355315	NaN	1.56799	-0.542327	0.687665	0.742395	0.702358	NaN	-0.222169	1.09129	1.32837	2.65377	2.09155	2.29294	1.89937	2.0011	2.56558	1.97484	NaN	0.553713	1.30583	1.36157	2.44067	NaN	1.58671	NaN	2.08169	1.72471	1.7937	1.99181	2.26795	1.47698	NaN	1.84384	1.32624	7393	Q9NRG7-2;Q9NRG7;Q9NRG7-3	Q9NRG7-2;Q9NRG7	Epimerase family protein SDR39U1	SDR39U1	SDR39U1	0.687665	1.87161	1.18394
0.681422	1.23766	-1.73704	-1.04823	-0.0893561	-0.339164	-1.20899	-1.78106	0.231013	-1.13536	-1.13497	-1.16222	-0.581341	-1.77933	-0.425939	-1.0092	-0.324543	0.699104	0.227652	0.61525	-0.797583	0.141954	0.608489	0.889396	-1.45565	-0.367399	0.385919	0.0999491	0.421791	-0.727987	0.100836	-2.25124	0.268926	-0.89534	0.218567	-0.0968143	-0.286151	0.378532	-0.66205	0.829737	0.995758	4141	Q3B726	Q3B726	DNA-directed RNA polymerase I subunit RPA43	TWISTNB	TWISTNB	-1.04823	0.121395	1.16963
-0.497895	NaN	-1.29868	-1.50719	-1.03035	-0.362598	NaN	-1.53487	0.373424	NaN	NaN	NaN	-1.35886	-1.45127	NaN	NaN	-0.285472	0.18186	0.0262891	0.437908	-0.469858	NaN	-0.21172	NaN	NaN	-0.887739	-0.179316	0.284662	0.296121	NaN	-0.175248	-0.836137	0.655272	-0.307537	0.0483746	-0.148369	-0.874353	-0.290691	NaN	0.0704366	0.381246	30	A4D1E9;A4D1E9-2;A4D1E9-3	A4D1E9;A4D1E9-2	GTP-binding protein 10	GTPBP10	GTPBP10	-1.29868	-0.161809	1.13687
2.56403	2.17518	0.771978	0.800771	2.07891	0.947723	-0.961	0.645174	2.26794	0.817366	-0.274776	0.606433	1.13791	0.443343	2.24781	1.83738	2.23151	1.33151	1.8097	2.91717	2.15106	2.05532	2.6931	1.34523	0.640524	2.03811	1.23281	2.05188	3.6327	1.56612	2.24546	0.400694	3.25069	2.03966	2.24584	2.73859	0.937492	1.05996	1.68026	1.54378	1.25882	7506	Q9NVH6;Q9NVH6-8;Q9NVH6-7;Q9NVH6-6;Q9NVH6-5;Q9NVH6-4;Q9NVH6-2;Q9NVH6-3	Q9NVH6;Q9NVH6-8;Q9NVH6-7;Q9NVH6-6;Q9NVH6-5;Q9NVH6-4;Q9NVH6-2;Q9NVH6-3	Trimethyllysine dioxygenase, mitochondrial	TMLHE	TMLHE	0.817366	1.93774	1.12038
NaN	0.736517	-1.08253	-0.841704	0.916507	-0.399191	-1.38156	-0.872443	1.37043	-0.156022	-1.16975	-1.01977	-0.577849	-1.04	-0.272418	-0.302721	0.898157	0.123684	0.019097	0.950311	0.0790752	0.596575	0.286965	0.503172	NaN	-0.249346	0.312739	0.866767	0.667486	-0.567949	0.39783	-0.793885	0.869297	-0.227375	0.926891	1.1195	-0.111585	0.393262	0.410786	0.628714	0.0960534	5450	Q8ND82;Q86YH2	Q8ND82	Zinc finger protein 280C	ZNF280C	ZNF280C	-0.709777	0.393262	1.10304
-1.03825	-0.778673	-2.19132	-1.98104	-0.0457261	-0.943187	-1.59809	-1.69409	0.0298999	-0.990873	-2.07889	-1.68749	-1.7334	-2.24644	-1.51641	-0.849841	-0.418967	-0.342903	-0.66621	-0.262723	-0.471233	-0.633004	-0.18577	-0.359668	-1.62423	-2.38572	-0.143232	-0.159782	-0.0307446	-2.28697	-0.588285	-1.35596	-0.0615834	-0.528247	0.315301	-0.0472613	-1.65239	-1.29241	-0.590518	-0.2809	-1.06393	5603	Q8TDD1;Q8TDD1-2	Q8TDD1;Q8TDD1-2	ATP-dependent RNA helicase DDX54	DDX54	DDX54	-1.59809	-0.49974	1.09835
-1.14491	-1.24487	-1.66744	-1.67137	-0.263991	-1.77345	-1.64851	-1.76914	-0.60774	-1.03774	-1.95611	-2.02728	-1.4652	-1.94711	-1.30364	-1.26572	-0.789932	-0.510413	-0.407926	-0.00208247	-0.980454	-0.446037	-0.454233	-0.354962	-1.62798	-1.45347	-0.0718102	0.0745633	0.421464	-2.03111	-0.852204	-1.61432	0.197453	-0.616434	0.12165	-0.401015	-1.3646	-0.808331	-0.848024	-0.182665	-0.728974	3782	Q14684;Q14684-2	Q14684;Q14684-2	Ribosomal RNA processing protein 1 homolog B	RRP1B	RRP1B	-1.64851	-0.563424	1.08509
NaN	0.473991	NaN	NaN	-1.06673	NaN	-0.75221	NaN	0.492701	-0.173216	-1.16812	-0.922528	NaN	NaN	-0.756958	-1.00687	-0.0891018	-0.30496	-0.505489	-0.0721678	-0.607574	-0.00913773	0.55114	0.575951	NaN	-0.131141	0.050904	NaN	0.670215	-0.603969	-0.55731	-0.000578144	-0.0906165	NaN	0.374808	-0.220634	-0.723951	-0.00849015	NaN	NaN	NaN	3116	P78345	P78345	Ribonuclease P protein subunit p38	RPP38	RPP38	-0.754584	-0.0898591	0.664725
3.21005	2.86458	1.3951	1.44025	3.12	1.28884	0.833626	1.17051	3.00582	1.69793	1.01012	1.16347	1.65402	1.28912	2.08036	1.38878	3.08623	2.05023	2.51155	3.11435	1.93525	2.82906	3.05806	1.94165	0.922716	2.5774	2.77905	1.88013	3.21231	1.73722	2.46052	0.941683	3.27072	1.60644	3.08197	2.75281	2.869	2.846	1.74831	2.46218	2.52148	5943	Q969X5-2;Q969X5;Q969X5-3	Q969X5-2;Q969X5	Endoplasmic reticulum-Golgi intermediate compartment protein 1	ERGIC1	ERGIC1	1.44025	2.51652	1.07627
-0.976109	-0.851048	-2.01863	-1.98104	-0.298163	-1.27275	-2.02071	-1.67444	-0.177524	-0.838424	-2.18505	-2.25985	-1.6818	-2.07944	-1.4939	-1.10833	-0.566066	-0.917862	-1.08627	-0.24371	-0.57804	-0.552395	-0.267975	-0.608015	-1.71293	-1.65238	-0.418928	-0.284095	-0.297156	-2.26342	-0.7511	-1.63249	-0.211373	-0.590408	0.235481	-0.584187	-1.24045	-1.04992	-0.958469	-0.156662	-0.932464	6526	Q99848	Q99848	Probable rRNA-processing protein EBP2	EBNA1BP2	EBNA1BP2	-1.67444	-0.599211	1.07523
NaN	-1.81386	-3.71515	-6.11225	-4.97505	NaN	-2.6373	-4.44293	-1.19637	-3.36912	-2.86087	-2.69303	NaN	-3.5139	-3.97683	NaN	NaN	NaN	NaN	-2.35359	-3.22984	-1.45214	NaN	NaN	NaN	-0.400854	-2.49284	-1.37822	-2.41161	-3.19847	-3.03535	-5.0018	NaN	-0.680571	-2.00248	-2.61894	-1.72032	-2.38254	-1.14088	-2.09766	-5.11889	3809	Q14807;Q14807-2	Q14807;Q14807-2	Kinesin-like protein KIF22	KIF22	KIF22	-3.44151	-2.36806	1.07345
1.27171	0.780037	-0.536942	-0.191498	2.25676	NaN	-0.871602	1.38827	1.53856	0.233034	-0.268245	0.20258	-0.17099	-0.853707	-0.259868	0.14328	2.36781	0.671208	2.20562	0.83142	2.37158	0.979595	1.81598	1.07505	NaN	-1.22348	1.57738	1.72976	NaN	0.395524	1.63352	-1.20762	2.65843	NaN	1.38169	1.81583	0.373229	0.954239	1.57059	0.780256	0.404942	8441	Q9Y6K1;Q9Y6K1-3	Q9Y6K1	DNA (cytosine-5)-methyltransferase 3A	DNMT3A	DNMT3A	0.015795	1.07505	1.05926
-0.839302	-0.34449	-2.1765	-1.82366	0.382562	-0.981641	-1.46512	-1.76236	-0.0881362	-0.887402	-2.07674	-1.36631	-1.51712	-1.93588	-0.770298	-0.707559	-0.224003	-0.172351	-0.314323	0.222273	-0.334241	-0.552973	0.386334	-0.0392157	-1.72814	-0.986813	-0.274428	0.476117	0.299224	-1.65731	-0.806604	-1.39037	-0.191982	-0.837531	0.121341	-0.00286123	-1.04021	-0.439947	-0.756621	0.00110534	-0.352288	2424	P42696;P42696-2	P42696;P42696-2	RNA-binding protein 34	RBM34	RBM34	-1.36631	-0.324282	1.04203
-0.539192	-0.831942	0.339674	-0.785385	1.09885	-0.353758	-2.71522	-0.573288	1.42951	0.0362366	-0.462036	0.107583	-0.176381	-0.752893	0.132603	-0.190661	1.2995	0.546842	2.26793	0.423866	0.668365	1.10017	0.678573	0.0992451	-1.24197	-0.409525	2.41588	2.56701	2.07691	-0.527067	2.22856	NaN	1.62498	0.183368	2.22896	2.54108	0.0219627	1.18093	0.808755	-0.346089	0.683	3879	Q15118;Q15118-2	Q15118;Q15118-2	[Pyruvate dehydrogenase (acetyl-transferring)] kinase isozyme 1, mitochondrial	PDK1	PDK1	-0.353758	0.683	1.03676
-0.129754	-0.404278	2.46304e-05	-0.452453	-0.474116	-0.0270788	-0.121426	0.231415	-0.289016	0.198429	-0.637267	-0.39108	-0.423595	-0.32514	-0.352705	-0.298237	-0.505714	-0.407942	-0.455821	-0.0166901	-0.600245	-0.128921	-0.633233	-0.759169	-0.0725953	-0.488034	-0.447673	-0.0254108	-0.24078	-0.569725	-0.33283	-0.257787	-0.599468	0.158596	-0.363546	-0.513859	-0.179282	-0.213098	0.0344576	-0.169501	-0.830677	3044	P62861	P62861	40S ribosomal protein S30	FAU	FAU	-0.32514	-0.348188	-0.0230479
NaN	0.965457	NaN	0.0223135	0.758032	0.78165	-0.154517	-0.57316	1.19964	0.558069	-0.459759	-0.0922693	NaN	0.0171275	NaN	-0.11017	1.17614	-0.0423351	1.33283	1.62674	1.00122	NaN	NaN	0.645285	-0.132885	-0.582839	NaN	1.52305	1.81748	-0.0260555	1.0405	NaN	1.718	NaN	1.88473	NaN	0.451843	0.326397	NaN	1.20842	1.63264	2589	P49753;P49753-2	P49753;P49753-2	Acyl-coenzyme A thioesterase 2, mitochondrial	ACOT2	ACOT2	0.0223135	1.0405	1.01818
1.17576	0.848031	-0.152582	-0.17698	0.903967	0.00627766	-0.86589	-0.390808	0.785807	0.00179777	-0.541946	-0.345914	0.00106005	-0.246247	0.394447	-0.0186367	0.512655	0.64049	0.307437	0.989303	0.374822	0.706248	0.726011	0.585516	-0.271825	-0.050554	0.683703	1.15966	0.741926	-0.284742	0.50977	-0.245877	0.804456	0.62339	1.4342	0.815604	0.342837	0.375769	0.474096	1.14457	0.789525	1929	P22087	P22087	rRNA 2-O-methyltransferase fibrillarin	FBL	FBL	0.00106005	0.604453	0.603393
-1.05196	-0.933219	-2.11552	-1.72798	-0.42642	-1.08885	-2.181	-1.70895	-0.202642	-0.997059	-1.55287	-1.92528	-1.34665	-1.86824	-1.29143	-1.42715	-0.595828	-1.04494	-0.83956	-0.224093	-0.912248	-0.494201	-0.164227	-0.724353	-1.5534	-1.20977	-0.57642	-0.219732	-0.114304	-1.806	-0.763232	-1.18875	-0.181857	-1.06675	0.0351916	-0.183921	-1.1562	-0.793381	-1.05857	-0.175848	-0.62533	7095	Q9H6R4-4;Q9H6R4;Q9H6R4-2;Q9H6R4-3	Q9H6R4-4;Q9H6R4;Q9H6R4-2;Q9H6R4-3	Nucleolar protein 6	NOL6	NOL6	-1.34665	-0.743792	0.602857
1.06854	0.677177	-0.482491	-0.165089	1.279	0.18818	-0.772081	-0.33877	0.830144	0.185652	-0.567059	-0.387455	0.0357591	-0.550695	0.543293	0.266615	0.729679	0.590974	0.333543	1.01559	0.617531	0.619768	1.17582	0.498176	-0.544329	-0.00929791	0.531725	1.24506	1.01364	-0.330145	0.620644	-0.330399	0.913422	0.573406	1.2806	0.880952	0.275444	0.529888	0.416503	1.12934	0.962308	7604	Q9NY12-2;Q9NY12	Q9NY12-2;Q9NY12	H/ACA ribonucleoprotein complex subunit 1	GAR1	GAR1	0.0357591	0.604253	0.568494
-1.13273	-0.908175	-1.78247	-1.88557	-0.719796	-1.18057	-1.77129	-1.339	-0.288287	-0.934455	-1.83904	-2.0806	-1.75953	-1.8853	-1.47068	-1.08414	-0.643112	-1.27253	-1.29987	-0.310342	-1.03177	-0.628026	-0.761132	-0.813	-1.61037	-1.29719	-0.469002	-0.165781	-0.289269	-1.97454	-0.973619	-1.62252	-0.57484	-0.841014	-0.290197	-0.500283	-1.14211	-1.07652	-1.0543	-0.356495	-1.19422	6846	Q9BZE4;Q9BZE4-2;Q9BZE4-3	Q9BZE4;Q9BZE4-2;Q9BZE4-3	Nucleolar GTP-binding protein 1	GTPBP4	GTPBP4	-1.47068	-0.907317	0.563361
0.889141	0.587438	-0.446839	-0.0788268	1.2364	0.148555	-0.839404	-0.471024	0.681789	0.176319	-0.623265	-0.49223	0.053184	-0.524927	0.362283	0.196949	0.64762	0.626248	0.186385	0.971918	0.557988	0.596255	1.18778	0.655999	-0.645534	-0.108432	0.712386	1.08569	0.796156	-0.191712	0.48419	-0.314319	0.920387	0.535595	1.20414	0.851378	0.164615	0.412469	0.416231	1.01344	0.871958	7570	Q9NX24	Q9NX24	H/ACA ribonucleoprotein complex subunit 2	NHP2	NHP2	0.053184	0.611252	0.558068
1.00234	0.623673	-0.433254	-0.140311	1.07442	0.105639	-0.939605	-0.32026	0.779583	0.127533	-0.574107	-0.528133	0	-0.520022	0.343115	0.0957428	0.655455	0.537249	0.342184	0.947003	0.634748	0.681303	1.12842	0.520984	-0.538534	-0.033005	0.448734	1.21297	0.938341	-0.395499	0.56358	-0.40581	0.869665	0.507813	1.22044	0.805827	0.251629	0.519509	0.361126	1.02869	0.863201	732	O60832;O60832-2	O60832;O60832-2	H/ACA ribonucleoprotein complex subunit 4	DKC1	DKC1	0	0.550415	0.550415
1.18163	0.817877	-0.6525	-0.230255	1.5664	0.119778	-0.903856	-0.622018	0.719977	-0.0285562	-0.808591	-0.2722	-0.055901	-0.856204	0.172012	0.290523	0.805681	0.629818	0.130055	1.17608	0.434822	0.428535	1.45179	0.849563	-0.650204	0.171544	0.543659	1.16141	0.895179	-0.489519	0.143279	-0.455817	1.03906	0.378729	1.10099	0.912069	0.280199	0.407317	0.200108	0.877345	1.18573	7297	Q9NPE3	Q9NPE3	H/ACA ribonucleoprotein complex subunit 3	NOP10	NOP10	-0.055901	0.48924	0.545141
1.1747	0.845918	-0.154773	-0.210223	0.703601	0.0382951	-0.533875	-0.306202	0.519482	0.00990635	-0.280498	-0.289083	0.0245038	-0.253257	0.437957	0.0367029	0.493618	0.638145	0.276669	0.776715	0.436136	0.788862	0.784962	0.508911	0.00965212	-0.0776458	0.657055	1.19491	0.660019	-0.127889	0.381078	-0.144375	0.639236	0.561886	1.14587	0.67636	0.290411	0.35705	0.53667	1.05894	0.609461	2852	P55769	P55769	NHP2-like protein 1;NHP2-like protein 1, N-terminally processed	NHP2L1	NHP2L1	0.00990635	0.549278	0.539372
-2.27429	-1.81809	NaN	NaN	-2.58917	-2.26401	-1.63155	-2.53009	-2.54016	NaN	NaN	-2.44552	NaN	-1.79006	-1.48345	-3.13723	NaN	-2.27372	-1.87645	-0.743978	NaN	-0.893791	-1.02617	-1.548	NaN	-3.27506	-1.48373	-1.23989	-0.859975	-2.23028	-2.93628	-1.32768	-1.55381	-1.13669	-1.16337	-2.88615	-2.00946	-1.90763	-1.54437	-0.991525	-2.35661	6596	Q9BRK5;Q9BRK5-6;Q9BRK5-4;Q9BRK5-3;Q9BRK5-2;Q9BRK5-5	Q9BRK5;Q9BRK5-6;Q9BRK5-4;Q9BRK5-3;Q9BRK5-2	45 kDa calcium-binding protein	SDF4	SDF4	-2.26915	-1.548	0.721145
-3.01599	-3.23956	-2.55944	-1.7357	-2.85716	-2.74695	-3.49732	-2.0433	-3.68868	-1.59226	-2.51792	-2.44867	-2.545	-2.35873	-2.95036	-3.52935	-3.05781	-3.52182	-3.50192	-1.8219	-2.38423	-1.53059	-3.35091	-3.45724	-1.9622	-3.35172	-3.04597	-1.45744	-2.49236	-3.15278	-3.56822	-3.10389	-3.55449	-2.24747	-2.12668	-2.83268	-1.71833	-2.84023	-3.20033	-1.89383	-3.2792	1426	P08195-2	P08195-2	4F2 cell-surface antigen heavy chain	SLC3A2	SLC3A2	-2.55944	-3.05189	-0.492448
NaN	NaN	-0.964862	NaN	0.484918	NaN	NaN	-1.10877	NaN	-0.900941	NaN	-1.47827	-0.46683	-1.00242	-0.838217	-0.954086	NaN	NaN	-0.477409	NaN	NaN	NaN	-0.897972	NaN	-1.13068	NaN	NaN	NaN	NaN	-1.48302	-0.765082	NaN	NaN	0.0840225	NaN	NaN	-0.885401	NaN	-0.799756	-0.0970314	NaN	6216	Q96IR7	Q96IR7	4-hydroxyphenylpyruvate dioxygenase-like protein	HPDL	HPDL	-0.932901	-0.842578	0.0903229
0.881097	0.27014	0.715753	0.818158	0.286647	0.860758	1.19406	-1.12587	-0.0390323	-0.346891	0.754202	0.873891	0.877187	1.09118	0.30237	0.2028	0.472762	1.0882	0.104754	0.286867	0.140463	0.224756	0.76185	1.01785	1.02824	-0.139002	1.1724	1.05058	-0.0836245	0.796892	0.0297535	0.81936	0.508973	-0.239588	0.49115	0.35194	0.689364	0.238453	0.317671	0.315081	0.480387	2548	P49189;P49189-2	P49189;P49189-2	4-trimethylaminobutyraldehyde dehydrogenase	ALDH9A1	ALDH9A1	0.754202	0.412351	-0.341851
0.991276	0.991049	-0.192318	0.47672	1.17773	0.964826	-1.51333	0.591156	1.07691	-0.354765	0.393598	1.0505	0.729703	0.694243	0.399961	1.55403	1.5584	1.054	0.955458	-0.383564	1.31642	-0.222899	1.14169	-0.559854	0.807371	-0.116736	0.676996	-0.425066	0.802288	0.980203	0.972434	0.539675	0.392237	-0.0778167	0.113931	0.933191	-0.0834545	-1.00967	0.7459	0.134111	1.20489	5580	Q8TCD5;Q8TCD5-2	Q8TCD5;Q8TCD5-2	5(3)-deoxyribonucleotidase, cytosolic type	NT5C	NT5C	0.694243	0.711448	0.0172046
NaN	-0.0579085	NaN	NaN	NaN	0.00467858	NaN	NaN	0.716027	-0.231192	NaN	0.062056	NaN	NaN	NaN	-0.41856	0.957711	NaN	NaN	NaN	NaN	0.22016	NaN	0.869259	NaN	0.888275	0.840909	0.518335	0.645173	-1.56782	-0.925078	NaN	0.546512	NaN	NaN	-0.258267	0.218476	0.272992	NaN	NaN	-0.738253	553	O43422;O43422-2	O43422	52 kDa repressor of the inhibitor of the protein kinase	PRKRIR	PRKRIR	0.00467858	0.272992	0.268314
-0.960909	-0.665427	-1.63196	-1.51161	-0.392484	-1.01308	-1.69704	-1.13627	0.0584348	-0.750682	-1.46977	-1.85559	-1.32538	-1.73118	-1.09244	-1.12908	-0.459907	-0.854923	-0.686417	0.211558	-0.618187	-0.331365	-0.121006	-0.578305	-1.65679	-1.06174	-0.594948	0.0631218	-0.0532235	-1.42931	-0.393257	-1.40345	-0.131916	-0.767007	0.261386	-0.176061	-0.689187	-0.674263	-1.11844	-0.0228175	-0.621118	5114	Q8IWA0	Q8IWA0	WD repeat-containing protein 75	WDR75	WDR75	-1.13627	-0.606567	0.529705
-0.850651	-0.479668	-1.37443	-1.36526	-0.426548	-0.956576	-1.16557	-1.35111	-0.507455	-0.51306	-1.57001	-1.86152	-1.39456	-1.30813	-1.18477	-0.874333	-0.629589	-1.3027	-0.972283	-0.112729	-0.924511	-0.376109	-0.837858	-0.474758	-0.975854	-0.75837	-0.484662	0.219408	-0.0584739	-1.24466	-1.12697	-1.68461	-0.423308	-0.710616	-0.606392	-0.484208	-0.856979	-0.441295	-0.296675	-0.0756101	-0.946608	481	O15381-5;O15381;O15381-3;O15381-2;O15381-4	O15381-5;O15381;O15381-3;O15381-2;O15381-4	Nuclear valosin-containing protein-like	NVL	NVL	-1.18477	-0.670103	0.514667
3.02418	0.170853	0.369737	0.439101	1.29376	1.88814	0.426088	0.689986	-0.426158	-0.184394	0.112095	0.927894	1.5396	0.442756	0.495803	0.449793	0.441374	1.45455	2.33573	-0.0900772	1.25239	0.80379	2.02993	-0.149269	1.11533	-0.259191	1.88263	1.57161	0.432456	0.619909	0.678243	-0.034533	1.0656	2.23252	0.70768	0.165061	-0.157295	-0.161305	2.11113	1.22773	2.02986	3193	Q00013;Q00013-2;Q00013-3	Q00013;Q00013-2;Q00013-3	55 kDa erythrocyte membrane protein	MPP1	MPP1	0.442756	0.755735	0.312979
-0.266849	-0.451291	0.214224	0.385195	-0.295239	0.971823	-0.196997	0.291735	-0.222972	-0.146134	0.459754	0.462027	0.267511	0.449003	0.303192	0.211713	0.174014	-0.0662495	0.316148	-0.989693	0.17174	-0.468083	0.428462	-0.337832	0.243027	-0.124685	-0.0599312	-0.676536	-0.806148	0.637297	-0.116398	0.315368	-0.520575	-0.0550866	-0.368729	-0.494511	-0.497451	-0.228598	0.352413	-1.09694	0.0998102	3504	Q13131;Q13131-2	Q13131;Q13131-2	5-AMP-activated protein kinase catalytic subunit alpha-1	PRKAA1	PRKAA1	0.267511	-0.0913238	-0.358835
NaN	0.11619	0.684908	0.581654	0.301406	1.18167	0.393167	0.385566	-0.0519712	0.112578	0.600409	0.667971	0.564961	0.612047	-0.0773601	0.385538	0.492866	0.379777	0.792817	-0.479726	0.184759	NaN	-1.54	0.235942	0.362105	0.261034	0.426723	-0.318961	-0.184013	0.761057	0.263407	0.160504	-0.341995	0.281282	-0.387132	-0.362076	-0.255669	-0.147534	0.190442	NaN	0.243659	8296	Q9Y478	Q9Y478	5-AMP-activated protein kinase subunit beta-1	PRKAB1	PRKAB1	0.479064	0.213192	-0.265873
0.0356103	-0.168496	0.395174	0.348492	-0.192723	0.964505	0.0974828	0.408381	-0.511894	0.0356831	0.652977	0.440746	0.463618	0.502763	0.642086	0.398688	-0.13885	0.0634264	0.405841	-0.993021	0.189887	-0.434279	0.385303	-0.0670973	0.359611	-0.157492	0.00122118	-0.446743	-0.602074	0.468363	0.0519488	0.164303	-0.442422	0.452059	-0.515836	-0.355616	-0.299148	-0.0851674	0.674884	-0.855197	-0.0444584	2802	P54619-2;P54619;P54619-3	P54619-2;P54619;P54619-3	5-AMP-activated protein kinase subunit gamma-1	PRKAG1	PRKAG1	0.395174	-0.0557779	-0.450952
1.14375	-0.0684545	NaN	NaN	1.04223	0.426936	NaN	NaN	NaN	0.279629	NaN	0.451426	0.928906	0.182558	NaN	NaN	0.846997	0.689385	0.950727	0.487705	0.403061	0.24234	1.02981	NaN	0.787684	0.663545	-0.0283252	NaN	0.0639152	1.42321	1.5466	-0.205099	0.740388	NaN	NaN	NaN	0.300343	NaN	NaN	0.330515	0.548045	2617	P49914;P49914-2	P49914;P49914-2	5-formyltetrahydrofolate cyclo-ligase	MTHFS	MTHFS	0.439181	0.605795	0.166614
-0.0983139	-0.756625	-1.11924	-1.17367	-0.30704	0.188087	NaN	NaN	-0.557711	NaN	NaN	-1.31057	NaN	NaN	-0.208466	-1.1016	-0.214165	NaN	-0.254842	0.394279	-0.435053	-0.0455538	0.464828	-1.25115	-1.58267	-0.571723	-0.545016	0.272234	0.281021	-1.14523	NaN	-0.430759	0.603952	-0.129152	0.00269258	0.0309804	-1.21761	0.0165602	NaN	-0.146332	0.470976	6032	Q96CB9-4;Q96CB9;Q96CB9-2;Q96CB9-3	Q96CB9-4;Q96CB9	5-methylcytosine rRNA methyltransferase NSUN4	NSUN4	NSUN4	-0.557711	-0.146332	0.411378
-0.221148	0.0718223	-0.316159	0.0726534	-0.826589	0.28469	1.31548	0.0364475	-0.417177	NaN	0.459178	0.320623	0.0968015	0.236751	-0.499943	-0.297239	-0.379563	0.969003	-0.208351	NaN	-0.900054	-2.12525	-0.593612	-0.564565	0.232661	-0.151251	-0.557068	NaN	-0.549423	0.234468	-0.345117	0.279708	-0.378035	0.0103467	-0.828744	-0.315863	-0.308789	-0.608049	0.187697	NaN	-1.17048	4382	Q5TFE4;Q5TFE4-2	Q5TFE4;Q5TFE4-2	5-nucleotidase domain-containing protein 1	NT5DC1	NT5DC1	0.0722378	-0.345117	-0.417354
NaN	-1.93634	NaN	NaN	-1.75425	-1.62238	-1.52822	NaN	NaN	NaN	-2.65266	-3.10774	NaN	NaN	NaN	NaN	-2.6582	NaN	-2.32625	-0.315938	-3.72002	NaN	-2.36121	-2.1211	-2.53615	NaN	-1.82484	-1.09863	-0.198534	-2.23154	NaN	0.420262	-1.21894	-0.551504	NaN	NaN	-1.68046	-2.09147	NaN	-0.37519	NaN	7130	Q9H857-3;Q9H857-2;Q9H857;Q9H857-4	Q9H857-3;Q9H857-2;Q9H857;Q9H857-4	5-nucleotidase domain-containing protein 2	NT5DC2	NT5DC2	-1.8453	-1.82484	0.0204585
0.795645	1.50712	-0.799242	NaN	-1.01372	NaN	-0.229196	-1.50502	-2.55797	-0.59939	-1.56986	-1.26291	-0.782776	-1.50555	-0.118973	NaN	-2.94062	NaN	-0.674627	0.800397	0.233232	0.246047	-1.14392	NaN	-1.76215	-0.0177673	-1.49052	-1.39195	-0.844481	-0.355275	NaN	-0.744088	-1.55025	0.107319	-1.64038	NaN	0.0260614	-0.427644	NaN	1.63262	0.626653	4975	Q86UY8-2;Q86UY8	Q86UY8-2;Q86UY8	5-nucleotidase domain-containing protein 3	NT5DC3	NT5DC3	-0.799242	-0.551135	0.248106
NaN	-0.804106	-0.81075	-1.34661	NaN	-0.842095	-0.551161	NaN	0.855948	-1.88561	NaN	0.00550774	-1.24371	-1.37941	-1.88642	-1.71922	-2.27598	-0.701419	-1.64619	NaN	-1.87302	-0.800234	-1.06331	-0.603364	-0.395956	NaN	NaN	NaN	NaN	-1.66283	NaN	-0.179739	NaN	-1.08228	-0.894114	NaN	-0.578691	-1.04861	NaN	NaN	-2.23701	388	O14841	O14841	5-oxoprolinase	OPLAH	OPLAH	-0.842095	-1.05596	-0.213863
NaN	1.62931	NaN	NaN	2.62193	NaN	1.09255	0.634571	NaN	NaN	1.76396	NaN	NaN	0.686059	NaN	NaN	3.70846	2.57732	NaN	NaN	NaN	NaN	2.35945	1.29498	NaN	2.72169	NaN	NaN	2.37086	2.03885	1.58257	NaN	NaN	NaN	NaN	2.26834	NaN	NaN	NaN	NaN	NaN	4205	Q53FA7;Q53FA7-2	Q53FA7	Quinone oxidoreductase PIG3	TP53I3	TP53I3	1.36093	2.35945	0.998518
NaN	0.426438	0.425409	0.501631	0.810076	0.579418	0.553442	0.024469	0.486219	0.888694	0.147464	0.229601	0.253745	0.352592	0.418795	0.587649	0.487471	0.258492	0.568958	1.21082	0.116104	0.659379	0.586954	0.172822	0.355483	0.360404	0.520425	0.747036	0.868643	0.276158	0.657288	0.412461	0.576832	0.31211	NaN	0.824957	0.884346	0.946443	0.775676	NaN	0.471273	2874	P56378;P56378-2	P56378;P56378-2	6.8 kDa mitochondrial proteolipid	MP68	MP68	0.425924	0.572895	0.146971
0.924102	0.526019	-0.142267	0.052338	0.284341	0.651389	-0.524076	0.0830729	0.353386	-0.00319967	-0.0044292	0	0.206376	-0.0323166	-0.11169	0.363266	0.51237	0.423729	0.251964	-0.044737	0.298376	-0.1627	0.437869	0.288084	0.103909	-0.328179	0.657668	0.483772	0.278075	0.0448165	0.502307	-0.646913	0.501211	-0.00213997	0.265111	0.279803	-0.421382	0.15242	0.391994	0.221894	0.803879	1541	P10155;P10155-3;P10155-5;P10155-4;P10155-2	P10155;P10155-3;P10155-5;P10155-4	60 kDa SS-A/Ro ribonucleoprotein	TROVE2	TROVE2	0.052338	0.278939	0.226601
-0.466122	-0.17649	-0.670891	-0.85327	0.306973	-0.891994	0.0261515	-0.24719	0.177124	-0.557243	-0.899959	-0.612741	-0.954662	-0.945694	-0.263404	-0.0682803	-0.147401	-0.837389	0.0959736	-0.0479846	-0.274856	-0.295119	-0.0335779	0.071058	-0.905982	-0.196047	0.0316999	-0.226085	0.364284	-0.37272	0.0161153	0.0153266	0.0723632	-0.308027	0.220913	0.251112	-0.423114	-0.042051	-0.478806	-0.210063	0.0229796	893	O75818-2;O75818	O75818-2;O75818	Ribonuclease P protein subunit p40	RPP40	RPP40	-0.557243	-0.0581324	0.49911
-1.03767	-0.75676	-1.18992	-1.59514	-0.487849	-1.23372	-1.40075	-1.23047	-0.0753393	-0.834299	-1.33514	-1.77412	-1.53661	-1.98381	-1.36703	-1.10076	-0.570341	-1.23788	-1.39195	-0.252322	-0.852541	-0.575095	-0.762596	-0.307423	-1.53889	-0.867907	-0.229019	-0.404134	0.092185	-1.74328	-0.63327	-1.38938	-0.4829	-0.792161	-0.153179	-0.363236	-0.811293	-0.996501	-1.182	-0.251413	-1.27217	3652	Q13823	Q13823	Nucleolar GTP-binding protein 2	GNL2	GNL2	-1.23372	-0.777379	0.456346
-0.528795	-0.579003	-0.830414	NaN	-0.378542	-0.588189	-1.03402	-0.753856	-0.0534756	-0.598571	-1.26061	-0.814639	-1.07301	-0.575266	-0.688775	-0.601263	-0.0746056	-0.389401	0.031673	0.227989	-0.436109	NaN	-0.408197	-0.337832	-0.884185	-0.150183	-0.318404	0.0934214	0.339487	-0.202847	-0.156961	-0.295397	0.268052	-0.153274	-0.0398274	-8.17097e-06	-0.237567	0.124604	-0.589307	0.872158	0.125745	6570	Q9BQC6	Q9BQC6	Ribosomal protein 63, mitochondrial	MRPL57	MRPL57	-0.643673	-0.153274	0.490399
-1.23416	-0.0959423	-1.03076	-0.809553	-0.750288	-1.33927	-0.793537	-1.72068	-0.444366	-0.911964	-1.17071	-1.02813	-0.959369	-0.591447	-0.929507	-1.32104	-0.590808	-0.374041	-0.736329	0.0662971	-1.07255	-0.522704	-0.391653	0.142226	-1.14648	-0.214896	-0.420623	-0.365254	-0.360803	-1.12286	-0.597267	-1.09218	-0.224765	-1.03083	-0.305382	-0.78948	-0.0546963	-0.111595	-1.39792	-0.520117	-0.708989	6931	Q9H089	Q9H089	Large subunit GTPase 1 homolog	LSG1	LSG1	-0.929507	-0.52141	0.408096
1.47865	0.239226	-0.557788	-0.172783	0.22204	1.74095	-0.100146	NaN	0.604252	-0.843979	-0.319901	0.0714208	0.402687	-0.382866	0.306628	0.524854	0.622278	0.812907	0.826114	0.574609	0.63159	0.21462	1.75276	0.659669	-0.064421	-0.700442	0.364321	0.356651	0.477962	0.0654034	0.455903	-0.0535686	1.29125	0.309399	1.2173	0.567177	-0.0174098	-0.0635616	0.970184	0.663516	1.42042	8254	Q9Y3B8-3;Q9Y3B8-2;Q9Y3B8	Q9Y3B8-3;Q9Y3B8-2;Q9Y3B8	Oligoribonuclease, mitochondrial	REXO2	REXO2	0.14673	0.546015	0.399285
-1.29931	-0.914069	-1.49227	-1.44683	-0.951547	-1.38796	-1.80724	-1.33199	-0.759253	-1.11773	-1.71369	-1.62812	-1.50498	-1.53158	-1.23436	-1.46711	-0.843599	-1.08075	-1.26545	-0.53581	-1.14225	-0.712221	-1.01699	-0.807154	-1.51221	-1.18159	-1.08819	-0.618834	-0.518725	-1.56067	-1.13266	-0.430135	-0.646384	-0.842088	-0.765653	-0.725506	-1.38323	-0.966311	-1.05475	-0.396786	-1.15248	6473	Q99575	Q99575	Ribonucleases P/MRP protein subunit POP1	POP1	POP1	-1.38796	-0.991648	0.396311
-0.59239	-0.787869	-0.84846	-1.63312	-0.380523	-1.05711	-1.82626	-1.43289	-0.250973	-0.92433	-1.73336	-2.14983	-1.05121	-1.96576	-1.27519	-1.20425	-0.613313	-1.06952	-0.910604	0.322034	-0.853779	-0.582587	-0.442306	-0.744227	-1.84314	-1.06631	-0.555531	0.0184898	-0.153209	-1.68522	-0.58405	-1.54372	-0.279629	-1.03053	0.192609	-0.302777	-0.866969	-0.516703	-1.03803	-0.0458112	-0.752372	5944	Q969X6;Q969X6-3;Q969X6-2	Q969X6;Q969X6-3;Q969X6-2	Cirhin	CIRH1A	CIRH1A	-1.05711	-0.67877	0.378345
0.124242	0.15421	-0.455974	-0.384429	0.167586	-0.128667	-0.30195	-0.318919	0.29748	-0.28713	-0.865222	-0.705682	-0.591335	-0.780392	-0.215624	-0.256511	0.0628033	-0.34827	-0.104214	0.135188	-0.190421	-0.124696	0.0781239	0.232125	-0.5464	0.175635	0.183392	0.0315012	0.285958	-0.527328	0.175408	0.146206	0.224328	-0.430888	-0.071241	0.482532	-0.367492	0.0605437	-0.464597	0.239761	0.100098	3117	P78346;P78346-2	P78346;P78346-2	Ribonuclease P protein subunit p30	RPP30	RPP30	-0.30195	0.0616735	0.363624
-0.815915	-0.712059	-1.94058	-1.21592	-1.06179	-0.732705	-1.39558	-1.15499	-0.588424	-0.627846	-1.18122	-1.24132	NaN	-1.46145	-1.21379	-0.638921	-0.891009	-0.911219	-1.09085	-0.559015	-1.23563	-1.1493	-0.754842	-0.4015	-1.07641	-0.868866	-0.336175	-0.600167	-0.371551	-1.6528	-0.862604	-0.998979	-0.720109	-1.2073	-0.875825	-0.593607	-0.672753	-0.787427	-1.27158	-0.569558	-0.701006	6057	Q96D46	Q96D46	60S ribosomal export protein NMD3	NMD3	NMD3	-1.16811	-0.825016	0.343091
-0.519364	0.154512	-1.03344	-0.720574	0.382981	-0.626594	-0.264361	-0.646284	0.320869	-0.50596	-0.807173	-1.20156	-0.593282	-0.625593	-0.365575	-0.259233	-0.141379	-0.917502	-0.916125	0.0101646	-0.257875	-0.505347	-0.144567	-0.445151	-0.982304	-0.567068	0.0205628	-0.673559	0.263294	-1.11214	-0.110282	-0.950846	-0.116451	0.0715146	-0.0183643	0.462201	-0.415595	-0.619765	NaN	-0.0517485	-0.613776	7514	Q9NVN8	Q9NVN8	Guanine nucleotide-binding protein-like 3-like protein	GNL3L	GNL3L	-0.593282	-0.259233	0.334049
-0.903561	-0.830098	-0.423179	-1.07044	-0.424882	-0.837326	-1.33335	-0.720525	0.0313971	-0.566971	-0.939733	-0.839632	-1.07224	-0.793764	-0.754502	-0.767644	-0.389988	-0.555666	-0.225375	0.0901164	-0.818365	-0.132254	-0.207675	-0.511281	-0.93562	-0.272363	-0.507129	0.113845	0.229709	-0.769034	-0.565901	-0.384183	0.351005	-0.541034	-0.19188	-0.0749458	-0.157295	-0.315712	-0.839024	-0.102366	-0.309745	6822	Q9BYD2	Q9BYD2	39S ribosomal protein L9, mitochondrial	MRPL9	MRPL9	-0.830098	-0.312728	0.517369
0.345287	0.520688	-0.0614005	NaN	NaN	NaN	-0.000921728	0.0475921	0.501303	NaN	NaN	-0.523709	-0.528276	-0.158831	NaN	-0.651886	0.4624	NaN	0.0673687	0.0281124	0.578209	0.366115	0.468109	0.444415	-0.464349	0.0631342	0.285982	0.337191	0.465999	-0.162352	-0.195554	0.0601036	0.487863	0.211135	0.747706	0.374397	-0.0499942	0.292472	NaN	0.686817	-0.0418979	4039	Q16594	Q16594	Transcription initiation factor TFIID subunit 9	TAF9	TAF9	-0.000921728	0.289227	0.290149
NaN	-0.485856	NaN	NaN	0.0987004	0.358157	-1.58881	-0.909981	0.556256	-0.423332	-0.657069	NaN	-0.629051	-0.689082	-0.423651	-0.484388	-0.0314304	-0.231124	-0.53684	0.354648	-0.114632	NaN	0.212919	-0.435456	NaN	-0.927672	-0.310521	1.00591	0.220941	-0.900409	-0.403607	NaN	-0.103208	NaN	0.516619	0.168557	-0.645572	-0.522119	NaN	NaN	-0.226398	8235	Q9Y324	Q9Y324	rRNA-processing protein FCF1 homolog	FCF1	FCF1	-0.485856	-0.228761	0.257095
0.0972499	0.123376	-0.218475	0.0292936	0.0746875	-0.373833	-0.483014	-0.286562	-0.116335	-0.303877	-0.298676	-0.324347	-0.227681	-0.2352	0.136061	-0.17616	-0.143482	0.228861	-0.192695	0.0727273	-0.136071	0.15548	0.184911	-0.0309623	-0.419474	-0.0456956	-0.0573233	0.167082	0.375784	-0.439009	-0.0662982	-0.13838	0.132757	-0.212456	0.289423	0.0481689	-0.213653	-0.0381071	-0.0721084	0.578641	0.168047	6939	Q9H0D6;Q9H0D6-2	Q9H0D6;Q9H0D6-2	5-3 exoribonuclease 2	XRN2	XRN2	-0.227681	-0.0419013	0.18578
-0.40944	-0.638144	-0.275964	-0.491952	-0.348529	-0.380566	-0.418921	-0.189867	-0.392111	-0.124976	-0.816271	-0.615724	-0.588301	-0.493793	-0.537593	-0.375652	-0.607948	-0.414622	-0.560556	-0.107341	-0.953615	-0.198919	-0.75295	-0.782097	-0.350607	-0.567184	-0.546951	-0.192227	-0.433802	-0.696906	-0.608093	-0.321963	-0.447262	-0.0275108	-0.322337	-0.640909	-0.372517	-0.460032	-0.461409	-0.273599	-0.777821	2058	P27635	P27635	60S ribosomal protein L10	RPL10	RPL10	-0.418921	-0.453647	-0.034726
NaN	0.613975	NaN	-0.852035	-0.0491397	-0.030031	-0.549489	-0.0915501	0.0411255	-0.0601876	0.0253909	NaN	-0.605554	-0.654075	0.213379	-0.591439	-0.134767	-0.558105	NaN	0.713664	NaN	-0.0353923	NaN	0.466917	NaN	NaN	0.880125	0.629646	0.634469	NaN	-0.0165313	-0.430759	0.450276	-0.204789	0.824062	1.06898	-0.199195	-0.0289516	NaN	NaN	0.232244	7968	Q9UKK6	Q9UKK6	NTF2-related export protein 1	NXT1	NXT1	-0.0546637	0.107856	0.16252
NaN	NaN	NaN	-0.963371	-1.45468	0.177336	-1.47201	-2.15027	NaN	NaN	-1.0192	-1.03652	NaN	NaN	NaN	-0.282203	-1.00565	-1.06855	-0.747819	NaN	NaN	NaN	NaN	-0.719663	NaN	-1.10992	-0.651341	NaN	NaN	-1.1652	-1.17998	NaN	-0.434068	NaN	NaN	-1.7179	-1.18426	-0.33643	NaN	NaN	-0.149312	6739	Q9BVS4-2;Q9BVS4	Q9BVS4-2;Q9BVS4	Serine/threonine-protein kinase RIO2	RIOK2	RIOK2	-1.03652	-0.876734	0.159783
-0.289971	-0.573352	-0.262821	-0.664389	-0.556767	-0.47963	-0.389085	-0.139281	-0.42589	-0.0978243	-0.740452	-0.579397	-0.58254	-0.54427	-0.399548	-0.30802	-0.726264	-0.468522	-0.645369	-0.183188	-0.487297	-0.111108	-0.706502	-0.753671	-0.37057	-0.616056	-0.457193	-0.0388906	-0.430366	-0.731773	-0.619253	-0.456891	-0.547211	0.166226	-0.280227	-0.637266	-0.351461	-0.467214	-0.220382	-0.174222	-0.915812	3052	P62906	P62906	60S ribosomal protein L10a	RPL10A	RPL10A	-0.47963	-0.462204	0.0174267
-0.427692	-0.607099	-0.343067	-0.634775	-0.586189	-0.501173	-0.462864	-0.139347	-0.400556	-0.131166	-0.864712	-0.576884	-0.666219	-0.661107	-0.614379	-0.408438	-0.688601	-0.48385	-0.679074	-0.179916	-0.527314	-0.218566	-0.894331	-0.766493	-0.436864	-0.587333	-0.626082	-0.12901	-0.443355	-0.816355	-0.565486	-0.525216	-0.503383	0.17797	-0.310054	-0.683752	-0.461599	-0.515212	-0.192506	-0.214008	-0.902118	3054	P62913	P62913	60S ribosomal protein L11	RPL11	RPL11	-0.576884	-0.509298	0.0675856
-0.284011	-0.681291	-0.309906	-0.582103	-0.498408	-0.312864	-0.250252	-0.0867382	-0.344005	-0.119278	-0.878919	-0.773491	-0.781638	-0.863497	-0.392684	-0.226113	-0.705094	-0.508081	-0.614935	-0.25377	-0.502067	-0.196621	-0.757046	-0.77944	-0.405362	-0.667587	-0.662867	-0.255365	-0.53384	-0.742735	-0.451946	-0.343551	-0.672013	0.148562	-0.315911	-0.629843	-0.481022	-0.604455	-0.0197432	-0.299482	-0.722653	2138	P30050;P30050-2	P30050;P30050-2	60S ribosomal protein L12	RPL12	RPL12	-0.392684	-0.505074	-0.11239
-0.673365	-0.731547	-0.501875	-0.592503	-0.492155	-0.68972	-0.280474	-0.0278046	-0.287996	-0.159932	-0.814245	-0.557386	-0.676563	-0.628932	-0.428224	-0.355972	-0.762145	-0.545675	-0.562732	-0.194212	-0.512574	-0.296087	-0.691796	-0.744569	-0.491997	-0.488402	-0.637455	-0.464312	-0.409141	-0.621005	-0.409667	-0.454588	-0.518588	-0.0615984	-0.399747	-0.588073	-0.33022	-0.558736	-0.41228	-0.385832	-0.809048	2036	P26373;P26373-2	P26373;P26373-2	60S ribosomal protein L13	RPL13	RPL13	-0.557386	-0.490199	0.0671871
0.258924	0.485388	-0.109463	-0.291874	0.33748	-0.18794	-0.104216	0.060025	0.200196	0.244834	-0.174488	-0.415464	-0.299782	-0.0799251	0.029554	-0.20257	0.146596	-0.151174	-0.434539	0.42933	0.00155066	0.270742	0.0139324	0.400399	-0.274197	0.300018	0.511387	0.639802	0.688053	-0.261395	-0.290752	-0.254171	0.164426	0.0262093	0.533678	0.00297571	0.221668	0.0186351	-0.219734	0.484957	-0.108607	7799	Q9UBU9;Q9UBU9-2	Q9UBU9;Q9UBU9-2	Nuclear RNA export factor 1	NXF1	NXF1	-0.0799251	0.0224222	0.102347
0.371769	-0.789648	-0.236687	-0.513869	-0.953193	0.324715	-0.180803	-0.687939	-1.42343	-0.845953	-0.354525	-0.139733	0.101368	-0.164926	-0.508752	-0.648347	-0.787786	0.166672	-0.372081	-1.24095	-0.443481	-0.782929	-0.360059	-0.786485	0.139954	-1.12778	-0.363464	-0.431159	-0.580302	-0.0699963	-0.68849	-1.45782	-0.80132	0.198467	-1.0354	-0.990768	-1.24885	-0.846455	0.648989	-0.723707	-0.260791	2927	P60891;P60891-2	P60891;P60891-2	Ribose-phosphate pyrophosphokinase 1	PRPS1	PRPS1	-0.354525	-0.668418	-0.313893
-0.614784	-0.738226	-0.411545	-0.777407	-0.581208	-0.695288	-0.431903	-0.104783	-0.547959	-0.173216	-0.813539	-0.671021	-0.699645	-0.734257	-0.587992	-0.453762	-0.758039	-0.589518	-0.671953	-0.272019	-0.622432	-0.274331	-0.845106	-0.807154	-0.538425	-0.589402	-0.687825	-0.2623	-0.462347	-0.664851	-0.582408	-0.488678	-0.676339	-0.0411241	-0.423555	-0.712601	-0.467319	-0.57005	-0.292237	-0.357197	-0.985735	2362	P40429;Q6NVV1	P40429	60S ribosomal protein L13a	RPL13A	RPL13A	-0.614784	-0.576229	0.0385545
-0.322863	-0.617157	-0.267511	-0.491094	-0.363675	-0.437759	-0.363392	-0.00111103	-0.236131	-0.101117	-0.682035	-0.606114	-0.612184	-0.484194	-0.383832	-0.21377	-0.607542	-0.439693	-0.514046	-0.0214256	-0.549966	-0.135227	-0.732515	-0.671816	-0.369584	-0.523806	-0.571679	-0.175765	-0.264391	-0.507547	-0.421273	-0.421072	-0.547989	0.193169	-0.166354	-0.522688	-0.31514	-0.416147	0.0391945	-0.19165	-0.711293	2657	P50914	P50914	60S ribosomal protein L14	RPL14	RPL14	-0.383832	-0.421172	-0.0373406
-0.254468	-1.08005	-0.100541	-0.267433	-1.06	0.369229	0.172323	0.00638292	-1.15624	-0.487799	-0.0738826	0.216466	-0.0213717	0.0300094	-0.534639	-0.0884039	-0.748507	-0.476904	-0.281394	-0.981232	-0.380644	-0.939747	-0.393116	-0.524479	0.0421026	-0.679773	-0.275133	-0.851315	-0.971844	0.254558	-0.760887	-1.17172	-0.832974	-0.0103417	-1.23646	-1.03207	-0.779658	-0.527092	0.460588	-1.16774	-0.512822	1604	P11908;P11908-2	P11908;P11908-2	Ribose-phosphate pyrophosphokinase 2	PRPS2	PRPS2	-0.100541	-0.603433	-0.502892
-0.502214	-0.669867	-0.384379	-0.626833	-0.331058	-0.452883	-0.239557	0.0820443	-0.239591	-0.0385948	-0.701018	-0.594063	-0.660451	-0.673696	-0.445375	-0.171681	-0.654056	-0.551151	-0.431897	-0.142617	-0.448376	-0.170992	-0.619757	-0.611516	-0.355344	-0.428127	-0.477464	-0.272088	-0.372928	-0.665448	-0.29883	-0.388178	-0.514703	-0.0102355	-0.445194	-0.489072	-0.256187	-0.437698	-0.237524	-0.347982	-0.811695	2963	P61313;P61313-2	P61313;P61313-2	60S ribosomal protein L15	RPL15	RPL15	-0.452883	-0.430012	0.0228713
-0.469137	-0.367456	-0.589515	-0.567875	-0.606301	-0.398908	-0.805655	-0.625489	-0.334688	-0.448288	-0.684071	-0.603111	-0.465413	-0.808612	-0.658316	-0.479746	-0.663551	-0.760307	-0.572627	-0.289663	-0.338133	-0.338532	-0.645351	-0.613499	-0.551512	-0.430166	-0.512888	-0.195566	-0.373351	-0.64707	-0.552303	-0.98134	-0.568729	-0.0424661	-0.424963	-0.445568	-0.690628	-0.491906	-0.352474	-0.239074	-0.622671	3089	P67870	P67870	Casein kinase II subunit beta	CSNK2B	CSNK2B	-0.589515	-0.502397	0.0871177
-0.296994	-0.497888	-0.189515	-0.685394	-0.511809	-0.391965	-0.410339	-0.111791	-0.45936	-0.175832	-0.757368	-0.577431	-0.619103	-0.615323	-0.568795	-0.343539	-0.71473	-0.432929	-0.556603	-0.068311	-0.56294	-0.0896032	-0.878518	-0.788963	-0.269581	-0.627196	-0.449126	-0.162959	-0.391528	-0.598748	-0.597946	-0.282894	-0.551194	0.0474669	-0.345932	-0.682399	-0.30779	-0.39959	-0.195278	-0.203802	-0.859523	1825	P18621;P18621-3;P18621-2	P18621;P18621-3;P18621-2	60S ribosomal protein L17	RPL17	RPL17	-0.497888	-0.416259	0.0816288
-0.634537	-0.619658	-0.531473	-0.499546	-0.354176	-0.775168	-0.223308	0.0925706	-0.149778	-0.159554	-0.714351	-0.524618	-0.524199	-0.869134	-0.337843	-0.172931	-0.650909	-0.571723	-0.545515	-0.0442608	-0.502067	-0.245385	-0.647493	-0.678657	-0.535464	-0.464797	-0.625807	-0.423484	-0.25931	-0.569598	-0.239807	-0.411805	-0.433325	-0.0467913	-0.434076	-0.365038	-0.184048	-0.538139	-0.482717	-0.448971	-0.916635	3349	Q07020;Q07020-2	Q07020;Q07020-2	60S ribosomal protein L18	RPL18	RPL18	-0.524199	-0.456884	0.0673152
-0.402706	-0.657747	-0.346905	-0.717579	-0.568509	-0.443687	-0.48733	-0.0888976	-0.31918	-0.192409	-0.891314	-0.711658	-0.691285	-0.622246	-0.627348	-0.326933	-0.66111	-0.508567	-0.711869	-0.163653	-0.688044	-0.205375	-0.80028	-0.765653	-0.384905	-0.697659	-0.619213	-0.162407	-0.486593	-0.802601	-0.536349	-0.485661	-0.588202	-0.0548825	-0.443348	-0.720743	-0.457323	-0.556876	-0.22543	-0.277977	-0.937254	3270	Q02543	Q02543	60S ribosomal protein L18a	RPL18A	RPL18A	-0.568509	-0.522458	0.0460506
-0.0448608	-0.54397	0.571017	0.12291	-0.191085	1.43165	1.28109	0.935982	-0.0708836	0.532152	0.685105	0.882313	0.832436	0.586374	0.876031	0.66796	0.260135	-0.0357409	0.358594	-0.835412	0.65215	-0.117259	0.0228749	-0.129649	0.782748	-0.0844288	-0.219635	-0.628634	-0.528696	0.837906	0.693461	-0.220773	-0.0133154	0.832427	-0.311866	-0.491084	0.0738057	0.253278	1.58942	NaN	0.255795	3761	Q14558;Q14558-2	Q14558;Q14558-2	Phosphoribosyl pyrophosphate synthase-associated protein 1	PRPSAP1	PRPSAP1	0.586374	0.0228749	-0.563499
0.642289	-0.15524	0.39112	0.302327	-0.0869374	0.912706	0.48489	0.278088	-0.641018	-0.101643	0.360101	0.525119	0.705371	0.437766	0.495665	0.176679	0.0521667	0.873498	0.767218	-0.656116	0.56058	-0.423369	0.70611	0.305663	0.843593	-0.377578	0.613063	-0.208152	-0.0266008	0.429044	0.139228	-0.201141	-0.353894	0.490378	-0.326856	-0.11515	-0.411995	-0.193413	0.705187	-0.807256	0.581259	650	O60256;O60256-3;O60256-2;O60256-4	O60256;O60256-3;O60256-2;O60256-4	Phosphoribosyl pyrophosphate synthase-associated protein 2	PRPSAP2	PRPSAP2	0.39112	0.0956972	-0.295423
-0.651085	-0.715772	-0.484234	-0.655572	-0.469511	-0.726566	-0.371627	0.0522162	-0.343441	-0.087633	-0.807351	-0.617319	-0.840126	-0.746677	-0.443618	-0.219518	-0.790289	-0.63581	-0.538358	-0.225717	-0.479458	-0.210332	-0.659053	-0.756972	-0.482346	-0.56193	-0.594294	-0.320428	-0.414993	-0.640533	-0.492787	-0.375038	-0.668826	0.147997	-0.263808	-0.558962	-0.367012	-0.459145	-0.280212	-0.438085	-0.944364	3172	P84098	P84098	60S ribosomal protein L19	RPL19	RPL19	-0.617319	-0.480902	0.136417
-0.387669	-0.671391	-0.277473	-0.68148	-0.535525	-0.442035	-0.335138	-0.156173	-0.448589	-0.145753	-0.781503	-0.606543	-0.625672	-0.55283	-0.48633	-0.358223	-0.715389	-0.449776	-0.670934	-0.192058	-0.55906	-0.228567	-0.864203	-0.793576	-0.43557	-0.628429	-0.607133	-0.214646	-0.424381	-0.640047	-0.457104	-0.468974	-0.579309	0.0256432	-0.283589	-0.703902	-0.379073	-0.469307	-0.263436	-0.261689	-0.880267	2485	P46778;REV__Q9NRL2-2;REV__Q9NRL2	P46778	60S ribosomal protein L21	RPL21	RPL21	-0.48633	-0.463039	0.023291
-0.466338	-0.733065	-0.135073	-0.719213	-0.564878	-0.419006	-0.661081	-0.344503	-0.503003	-0.11173	-0.930443	-0.703784	-0.605661	-0.640107	-0.580549	-0.547841	-0.645782	-0.427989	-0.679327	-0.297788	-0.735142	-0.216312	-0.907703	-0.828542	-0.310216	-0.638145	-0.654747	0.0125133	-0.393404	-0.789281	-0.723678	-0.701121	-0.513306	-0.0643344	-0.454835	-0.705338	-0.356905	-0.284302	-0.646409	-0.350343	-0.880735	2489	P46783;Q9NQ39	P46783;Q9NQ39	40S ribosomal protein S10;Putative 40S ribosomal protein S10-like	RPS10;RPS10P5	RPS10	-0.580549	-0.592993	-0.0124438
-0.535803	-0.732306	-0.370661	-0.676993	-0.657408	-0.516655	-0.555668	-0.210045	-0.567158	-0.28713	-0.846745	-0.5439	-0.669299	-0.615323	-0.584332	-0.475542	-0.792966	-0.544161	-0.673863	-0.189427	-0.759363	-0.242719	-0.919073	-0.898675	-0.382587	-0.574626	-0.653582	-0.239115	-0.554209	-0.759378	-0.626476	-0.488979	-0.627215	-0.0204848	-0.415542	-0.852418	-0.39398	-0.495691	-0.261042	-0.373908	-0.844641	3010	P62280	P62280	40S ribosomal protein S11	RPS11	RPS11	-0.567158	-0.549185	0.0179734
-0.142816	-0.52717	-0.0879843	-0.561979	-0.420515	-0.205352	-0.442159	-0.393659	-0.40449	-0.0602825	-0.760764	-0.312118	-0.485237	-0.43994	-0.406896	-0.370872	-0.690901	-0.327453	-0.449435	-0.182371	-0.537096	-0.054386	-0.796195	-0.66503	-0.228307	-0.426724	-0.610648	0.0765653	-0.377893	-0.695851	-0.61348	-0.210322	-0.516597	0.216555	-0.370861	-0.652638	-0.238353	-0.397507	-0.243024	-0.0454049	-0.769284	2013	P25398	P25398	40S ribosomal protein S12	RPS12	RPS12	-0.406896	-0.3877	0.0191964
-0.255959	-0.496129	-0.247634	-0.500825	-0.274618	-0.371247	-0.343674	-0.217985	-0.289016	0.00616591	-0.737193	-0.377531	-0.40142	-0.414048	-0.501999	-0.271093	-0.502989	-0.347614	-0.380129	-0.000250175	-1.07422	-0.138887	-0.677943	-0.640674	-0.263889	-0.514066	-0.268655	-0.00422731	-0.13126	-0.781746	-0.704515	-0.416052	-0.253581	0.0993013	-0.366181	-0.660478	-0.207646	-0.286685	-0.273349	-0.137089	-0.560443	2275	P35268	P35268	60S ribosomal protein L22	RPL22	RPL22	-0.371247	-0.31715	0.0540973
-1.61477	-2.46504	-0.695555	-2.04939	-0.452341	-1.80936	-1.99184	-2.91213	-2.00925	-2.22511	-2.99336	-2.04429	-2.13565	-2.25935	-2.29304	-2.1509	-1.71928	-1.50471	-2.04386	-0.648639	-1.74612	NaN	-1.04019	-0.723486	NaN	NaN	-1.78375	-1.48951	-1.73556	-3.12885	-1.78535	-0.353839	-1.87147	-0.180375	-1.34513	-2.34581	-2.15386	-2.53783	-0.398675	-0.90877	-1.48163	4599	Q6P5R6	Q6P5R6	60S ribosomal protein L22-like 1	RPL22L1	RPL22L1	-2.04939	-1.71928	0.330111
-0.269436	-0.615562	-0.246607	-0.687253	-0.465767	-0.405682	-0.592512	-0.35591	-0.515183	-0.207448	-0.808059	-0.600532	-0.594039	-0.614915	-0.656023	-0.510664	-0.648545	-0.371894	-0.643296	-0.175329	-0.67872	-0.141146	-0.741442	-0.758578	-0.291864	-0.647911	-0.569207	-0.0747063	-0.504671	-0.788285	-0.661623	-0.481428	-0.551582	-0.00331532	-0.42871	-0.696597	-0.341856	-0.501942	-0.14634	-0.198962	-0.925662	3037	P62829	P62829	60S ribosomal protein L23	RPL23	RPL23	-0.592512	-0.507667	0.0848446
-0.292033	-0.493359	-0.16187	-0.700201	-0.398105	-0.361586	-0.229784	-0.0622399	-0.24634	0.0423883	-0.711885	-0.512187	-0.531213	-0.439131	-0.45662	-0.183736	-0.536527	-0.45221	-0.588233	-0.110519	-0.434935	-0.0825467	-0.769375	-0.652634	-0.305714	-0.538243	-0.409783	0.00299792	-0.269336	-0.707992	-0.424424	-0.388338	-0.435022	0.230552	-0.18872	-0.517118	-0.224668	-0.362321	0.00359247	-0.0565753	-0.830484	3032	P62750	P62750	60S ribosomal protein L23a	RPL23A	RPL23A	-0.398105	-0.39906	-0.000955626
-0.272633	-0.551042	-0.173532	-0.624986	-0.491418	-0.314353	-0.349776	0.0215767	-0.283323	-0.0379747	-0.753044	-0.531866	-0.484071	-0.429152	-0.459232	-0.348232	-0.592859	-0.363056	-0.607935	-0.175534	-0.401689	-0.168968	-0.682905	-0.68439	-0.222859	-0.466042	-0.357163	-0.0614864	-0.445857	-0.647191	-0.450174	-0.278309	-0.436082	0.0493137	-0.316169	-0.529391	-0.278527	-0.329761	-0.171079	-0.166104	-0.779923	3163	P83731	P83731	60S ribosomal protein L24	RPL24	RPL24	-0.429152	-0.360109	0.0690424
-0.982283	-0.708475	-2.6275	-1.81491	-1.88033	-0.940231	-1.62016	-1.1438	-1.73774	-0.744401	-1.29658	-1.75745	-1.39692	-1.1315	-1.29215	-1.05779	-1.81711	-0.593086	-1.18516	-0.675428	-1.69972	-2.21939	-0.758409	-1.62433	-0.723896	-1.62621	-1.35558	-1.3689	-1.27651	-1.87598	-1.03408	-1.35761	-1.4207	-1.10773	-0.292303	-1.61841	-1.82029	-0.948428	-0.136079	-0.987358	-1.02584	8036	Q9ULX3	Q9ULX3	RNA-binding protein NOB1	NOB1	NOB1	-1.29658	-1.23084	0.0657394
-0.792239	-0.0607938	-1.34283	-0.876677	0.909032	-0.303605	-3.11954	-0.392804	1.53121	0.535023	-1.45837	-1.43236	-0.557049	-1.46848	-0.94034	-0.00639122	1.21948	0.19986	-0.534077	0.781894	0.840955	0.209899	0.31741	-0.789376	-1.37966	-0.648021	-0.19247	0.778215	0.607376	-1.22743	0.710457	-2.10997	-0.0181518	-0.197429	0.891654	0.981882	-0.294745	0.522203	-0.342247	0.235374	0.6735	7474	Q9NUQ2	Q9NUQ2	1-acyl-sn-glycerol-3-phosphate acyltransferase epsilon	AGPAT5	AGPAT5	-0.792239	0.20488	0.997119
-0.852645	-1.10059	-0.588705	-0.929337	-0.853622	-0.719122	-0.604103	-1.28296	-0.778971	-0.78221	-1.14978	-0.374376	-0.659419	-1.08034	-0.714439	-0.510958	-0.804245	-0.820322	-0.441711	-0.672073	-0.626046	-0.724492	-0.884322	-0.761278	-0.644517	-1.03398	-0.427066	-0.902342	-1.19395	-0.627745	-0.767545	-1.07126	-0.21351	-0.679805	-0.617635	-1.34129	-1.12781	-0.654338	-0.710142	-0.807064	-0.636687	5399	Q8NB90;Q8NB90-2;Q8NB90-3	Q8NB90;Q8NB90-2;Q8NB90-3	Spermatogenesis-associated protein 5	SPATA5	SPATA5	-0.78221	-0.717317	0.0648929
-0.498634	-0.652452	-0.338737	-0.553087	-0.614159	-0.533299	-0.438981	-0.11882	-0.56422	-0.157789	-0.72097	-0.645417	-0.586998	-0.605903	-0.525146	-0.42445	-0.804511	-0.507984	-0.700632	-0.183188	-0.428935	-0.231747	-0.732302	-0.859396	-0.444837	-0.625176	-0.637002	-0.112526	-0.344564	-0.717848	-0.530152	-0.456124	-0.511808	0.124086	-0.321995	-0.693189	-0.409784	-0.535517	-0.122287	-0.340576	-0.945083	3009	P62277	P62277	40S ribosomal protein S13	RPS13	RPS13	-0.553087	-0.482054	0.0710326
NaN	NaN	2.45143	2.7682	4.97088	NaN	3.09913	2.75707	NaN	3.72991	2.53266	2.92151	2.83087	3.50827	3.62688	NaN	NaN	NaN	NaN	NaN	4.61514	3.80205	NaN	NaN	3.87601	3.49316	NaN	NaN	NaN	3.92727	NaN	3.98089	NaN	5.15897	NaN	NaN	3.82783	3.83639	6.10316	NaN	NaN	316	O00602;Q15485	O00602	Ficolin-1	FCN1	FCN1	2.92151	3.90164	0.980132
NaN	NaN	NaN	0.653626	NaN	NaN	NaN	NaN	-0.288579	NaN	0.0217178	0.176161	0.325639	0.389242	NaN	0.0537176	0.593823	NaN	-1.1655	NaN	0.864364	NaN	NaN	-0.598982	0.634419	-0.394612	0.670985	NaN	NaN	0.483082	NaN	0.638892	-0.569016	-0.503818	NaN	NaN	NaN	NaN	NaN	NaN	NaN	4086	Q16875-3;Q16875-2;Q16875;Q16875-4	Q16875-3;Q16875-2;Q16875;Q16875-4	6-phosphofructo-2-kinase/fructose-2,6-bisphosphatase 3;6-phosphofructo-2-kinase;Fructose-2,6-bisphosphatase	PFKFB3	PFKFB3	0.2509	0.2684	0.0174999
-1.92318	-1.50742	-2.02919	-2.5523	-0.786007	-1.3814	-2.78622	-1.95152	-0.527773	-1.15945	-2.47045	-2.60578	-2.07394	-2.87786	-1.54788	-1.21247	-0.696442	-1.4318	-0.987885	-0.451076	-1.1656	-0.789722	-0.314427	-0.83994	-2.3438	-2.09963	-0.961674	-0.587045	-0.60499	-2.63446	-0.875951	-1.39683	-0.61434	-1.01505	-0.269188	-0.564942	-1.82237	-1.44514	-1.56136	-0.447125	-1.28566	6804	Q9BXY0	Q9BXY0	Protein MAK16 homolog	MAK16	MAK16	-1.95152	-0.974779	0.976743
0.294795	-0.13146	-0.954759	0.550657	0.189586	0.467023	0.901015	0.575783	-0.424151	-1.24871	0.860092	0.77555	0.527922	0.386386	-0.178148	0.817009	0.303345	0.44644	-0.220386	-1.44114	0.08972	-1.72548	0.460283	-0.0369886	0.84546	-0.968129	-0.0927263	-1.29234	-0.321851	0.794844	0.392204	1.04997	-0.279032	-1.24907	-0.872112	-0.342613	-1.12617	-1.26488	0.389039	-1.33878	0.554529	1031	O95336	O95336	6-phosphogluconolactonase	PGLS	PGLS	0.386386	-0.156556	-0.542942
-0.574869	-1.67259	-2.77652	-0.977787	-1.09679	-0.969256	-0.667875	-1.41271	-1.40114	-1.9946	-0.537428	-0.260877	-0.979534	-1.16092	-1.65452	-0.809285	-1.26354	-1.45274	-0.95492	-1.5869	-0.551811	-1.56585	-0.71612	-0.699851	-1.00426	-2.10317	-0.488095	-1.33094	-0.562084	-0.471422	-0.476711	-1.05989	-0.703467	-1.02754	-0.840217	-1.038	-2.60955	-2.63875	-0.749941	-1.33534	-1.05911	2313	P36639-4;P36639-3;P36639-2;P36639	P36639-4;P36639-3;P36639-2;P36639	7,8-dihydro-8-oxoguanine triphosphatase	NUDT1	NUDT1	-1.09679	-1.0159	0.0808939
-1.29888	-0.638293	-0.187377	-0.394374	-0.932299	-0.0155913	-0.0506617	0.0988347	-0.721624	-0.0837747	-0.437121	-0.44893	-0.730252	-0.362136	-0.73034	-0.689019	-1.16941	-0.998276	-0.503519	-0.35888	-0.893445	-0.331293	-1.52665	-0.757395	-0.461809	0.188245	-1.46883	-1.08593	-1.10066	-0.319359	-1.06525	-0.45305	-1.02799	-0.658931	-1.08012	-0.92819	0.173462	-0.370138	-0.846076	-0.664783	-1.57871	1567	P11021	P11021	78 kDa glucose-regulated protein	HSPA5	HSPA5	-0.437121	-0.801736	-0.364614
-2.79211	-2.95067	-3.94189	-3.26208	-3.87117	-2.63728	-4.16228	-2.12251	-3.9843	-2.54941	-3.89916	-0.725898	-2.48016	-3.26	-2.54226	-2.78088	-4.15738	-1.67458	-1.52582	-1.19082	-2.10391	-1.45123	-2.22196	-3.16757	-3.43579	-2.94023	-2.51213	-1.66788	-3.14203	-3.85596	-2.23202	-2.35254	-1.10221	-0.356334	-1.38149	-4.1572	-3.09737	-3.85647	-2.25254	-1.61446	-3.28847	7782	Q9UBM7	Q9UBM7	7-dehydrocholesterol reductase	DHCR7	DHCR7	-2.95067	-2.30254	0.648122
0.194473	0.0780736	NaN	-1.66984	0.548692	-1.24336	-1.22401	-0.909668	0.188589	-0.658071	-1.26856	-1.29523	-0.996807	-1.47015	-0.559397	-0.478846	0.0209538	-0.358941	-0.784688	-0.042751	-0.0581008	-0.167193	-0.950098	-0.0396109	-1.46597	-0.435125	-0.247481	-0.0439659	0.357701	-1.09808	-1.00567	-0.735212	-0.0176412	0.0570783	-0.0454844	0.133936	-0.787047	-0.450025	NaN	0.0582127	-0.147951	4806	Q7L2J0	Q7L2J0	7SK snRNA methylphosphate capping enzyme	MEPCE	MEPCE	-0.953238	-0.167193	0.786045
-0.107679	0.445474	0.863233	0.690502	0.602784	1.23506	0.307626	0.446534	0.24853	0.808888	0.59098	0.50795	0.776174	0.54435	0.781167	-0.0279493	0.0354418	1.01438	1.83122	1.18805	0.323577	1.40147	0.750435	0.739721	0.378397	1.29804	0.025538	0.115192	-0.118703	0.73943	0.119534	0.768498	0.335015	0.674117	0.415697	0.174204	1.4858	0.900427	0.012891	0.531385	0.80025	1123	O95870;O95870-2	O95870;O95870-2	Abhydrolase domain-containing protein 16A	ABHD16A	ABHD16A	0.59098	0.602751	0.0117707
0.0437113	-0.528722	0.579285	0.414431	0.192171	1.14537	0.626392	0.776711	-0.0254027	0.343389	0.532527	0.68242	0.850151	0.923153	0.478864	0.821907	0.699752	0.589718	1.76649	-0.726542	0.627889	-0.367122	1.07595	-0.0668823	0.947618	0.0912374	-0.0498851	-0.180516	-0.0830933	0.622418	0.653402	0.728228	0.307509	0.397693	-0.157817	-0.449586	-0.0483986	0.210159	0.778734	-0.902144	0.43969	5218	Q8IZP0-10;Q8IZP0-8;Q8IZP0-7;Q8IZP0-2;Q8IZP0-4;Q8IZP0-3;Q8IZP0-5;Q8IZP0-6;Q8IZP0-9;Q8IZP0;Q8IZP0-12;Q8IZP0-11	Q8IZP0-10;Q8IZP0-8;Q8IZP0-7;Q8IZP0-2;Q8IZP0-4;Q8IZP0-3;Q8IZP0-5;Q8IZP0-6;Q8IZP0-9;Q8IZP0;Q8IZP0-12;Q8IZP0-11	Abl interactor 1	ABI1	ABI1	0.532527	0.352601	-0.179925
0.75181	0.862881	3.23951	2.17945	0.292768	1.04262	1.97486	3.33019	1.20395	3.60545	-0.0399325	1.96956	1.06762	1.59317	1.55433	0.747599	2.08032	1.88042	0.0399887	NaN	1.81353	1.73809	-8.92215	NaN	0.729247	2.10083	-2.46958	NaN	0.288224	1.23105	2.781	3.14901	0.414908	2.05499	1.8437	2.53525	4.08626	0.166228	NaN	NaN	0.439489	8325	Q9Y4K1;Q9Y4K1-2	Q9Y4K1	Absent in melanoma 1 protein	AIM1	AIM1	1.55433	1.73809	0.183759
-0.9489	NaN	0.876812	-0.547229	NaN	-0.52585	0.0113612	-2.4604	NaN	NaN	NaN	NaN	-0.555385	-0.127191	-1.31013	NaN	-1.70414	-0.960896	-1.73409	-1.19745	NaN	-1.90572	-1.46928	-1.4463	-0.129889	-2.02302	NaN	NaN	-1.78971	-0.103222	-1.88002	-0.957886	NaN	NaN	NaN	NaN	NaN	-1.77598	NaN	NaN	-1.07328	4977	Q86V21;Q86V21-3;Q86V21-2	Q86V21;Q86V21-3;Q86V21-2	Acetoacetyl-CoA synthetase	AACS	AACS	-0.547229	-1.46928	-0.922048
-0.159083	0.057906	0.284917	0.151845	0.571514	-0.282049	0.441759	-0.560716	0.450902	0.291837	-0.0936957	-0.130431	-0.186444	0.157722	-0.0146818	-0.223166	-0.126992	-0.179296	0.15573	0.566539	-0.287108	0.476346	-0.547421	0.389399	-0.145297	0.432621	-0.210803	-0.195566	0.484969	-0.116638	-0.218328	0.470637	0.381629	0.197065	-0.326005	0.127589	0.37468	0.393193	0.190359	0.285142	-0.24979	13	A1L0T0	A1L0T0	Acetolactate synthase-like protein	ILVBL	ILVBL	0.057906	0.141659	0.0837532
-0.799313	-1.25607	-2.65146	-1.41092	-2.39403	-1.09732	-2.24009	-1.59569	-2.12869	-2.32402	-1.23225	-1.28635	-1.03067	-1.60204	-2.19953	-1.68654	-1.41726	-0.305862	-1.40437	-2.26448	-1.64124	-2.01969	-1.14815	-1.72381	-1.11264	-2.47077	-1.16996	-1.78162	-1.18753	-1.43493	-2.31584	-1.38226	-1.76331	-2.06152	-2.09572	-2.21737	-2.64582	-2.91658	-1.2915	-1.70166	-0.846749	6756	Q9BWD1;Q9BWD1-2	Q9BWD1;Q9BWD1-2	Acetyl-CoA acetyltransferase, cytosolic	ACAT2	ACAT2	-1.59569	-1.6941	-0.0984086
-0.913155	-2.10576	0.305299	-0.487333	-0.0883381	-1.26052	-0.480073	-0.444853	0.100556	0.0772531	-0.401206	-0.372732	-0.64791	0.192254	-0.0817892	0.0166573	-0.434842	-1.40997	-0.258916	0.194522	-0.474209	-0.182639	0.0849029	0.0637532	-0.114874	0.0872558	0.504082	0.551164	-1.90066	-0.385289	-0.390048	-0.191232	-0.605995	0.118916	0.583067	-0.313468	0.349317	0.353474	-0.579182	-0.818163	-0.969657	1999	P24752;P24752-2	P24752	Acetyl-CoA acetyltransferase, mitochondrial	ACAT1	ACAT1	-0.401206	-0.186936	0.21427
-2.69098	-2.71611	-2.73729	-2.66161	-2.74985	-1.63216	-1.41975	-2.11377	-2.39102	-2.2693	-2.10499	-2.00278	-2.39112	-2.72811	-2.27602	-2.40099	-2.6576	-2.55001	-1.85258	-1.61037	-2.47632	-2.06822	-1.65517	-2.18173	-2.23094	-2.01464	-2.38342	-1.63663	-2.24874	-2.14438	-2.55944	-2.23403	-2.17557	-1.49833	-2.02102	-2.61785	-2.48768	-2.18553	-2.37559	-1.6617	-2.09939	3492	Q13085;Q13085-4;Q13085-2;Q13085-3	Q13085;Q13085-4;Q13085-2;Q13085-3	Acetyl-CoA carboxylase 1;Biotin carboxylase	ACACA	ACACA	-2.39102	-2.18363	0.20739
3.7479	3.87862	1.78979	1.45503	3.03481	2.76907	1.55966	2.00507	4.38567	2.27066	2.17957	1.87156	2.35086	2.62119	3.86142	2.68698	2.84797	2.36755	4.16957	4.17946	3.54121	2.87702	4.43847	2.5441	1.73385	4.01538	2.81686	3.62463	3.92841	1.73244	2.12475	1.77626	3.58431	3.17267	3.77752	2.06183	1.6714	3.54355	3.23785	3.01934	4.00449	7460	Q9NUB1-2;Q9NUB1;Q9NUB1-3;Q9NUB1-4	Q9NUB1-2;Q9NUB1;Q9NUB1-3;Q9NUB1-4	Acetyl-coenzyme A synthetase 2-like, mitochondrial	ACSS1	ACSS1	2.35086	3.096	0.745138
-0.36338	-0.55592	0.221067	0.757371	-0.39693	0.487501	1.16339	1.17353	-0.312877	0.194284	0.89382	1.04435	0.594304	0.662969	-0.113981	0.832011	0.272292	-0.924042	0.404585	NaN	0.439438	NaN	0.912055	0.0899409	0.933755	0.0157793	0.555624	NaN	-1.72455	0.688524	0.396445	1.29513	-1.13072	NaN	NaN	-0.0690014	0.0180688	-0.257814	0.0359408	NaN	0.315508	7366	Q9NR19;Q9NR19-2	Q9NR19;Q9NR19-2	Acetyl-coenzyme A synthetase, cytoplasmic	ACSS2	ACSS2	0.487501	0.2939	-0.193601
0.127082	0.345935	0.0301547	0.625142	-0.267825	0.139125	0.813972	0.577517	-0.281421	0.407678	0.533648	0.202728	0.201935	-0.0236799	0.307734	0.577946	-0.114749	0.486309	-0.322024	0.292171	0.549473	0.0970109	-0.223048	0.171565	0.566741	-0.426851	0.170488	0.13412	-0.547301	0.333198	0.275306	0.645787	-0.362775	-0.342627	-0.320883	-0.255501	-0.46855	-0.335583	0.81796	0.17025	-0.105218	276	O00400	O00400	Acetyl-coenzyme A transporter 1	SLC33A1	SLC33A1	0.202728	0.115565	-0.0871625
2.8329	2.70364	2.58151	2.4138	3.34969	1.10409	1.36524	2.08621	1.7576	2.64098	2.05858	1.81851	2.30368	2.28454	2.89702	2.05233	2.17353	2.73391	1.5626	1.53777	3.04772	2.807	1.38285	1.6682	1.70244	2.51786	1.19774	1.62403	2.00682	2.07311	2.11402	2.41731	2.34349	2.85655	1.93756	2.09866	2.98502	2.49785	2.9874	2.32065	2.29778	3596	Q13510;Q13510-2;Q13510-3	Q13510;Q13510-2;Q13510-3	Acid ceramidase;Acid ceramidase subunit alpha;Acid ceramidase subunit beta	ASAH1	ASAH1	2.30368	2.14378	-0.159903
-0.446595	-0.47208	0.366327	-0.0885671	-0.374441	0.25487	0.408136	0.515002	-0.342878	0.440205	-0.103187	0.447155	-0.155179	-0.0379991	-0.125913	-0.256681	-0.417694	-0.316868	0.0608939	0.610802	-0.35459	0.309174	-0.217394	0.152426	0.296581	-0.454426	-0.243279	-0.161717	-0.331947	0.374412	-0.279215	-1.03483	-0.0987045	0.218088	0.600187	-0.446665	0.458054	0.291677	-0.649027	-0.226662	-0.619453	555	O43427-2;O43427	O43427-2;O43427	Acidic fibroblast growth factor intracellular-binding protein	FIBP	FIBP	-0.0885671	-0.222028	-0.133461
1.15159	1.54213	0.264221	0.637798	0.649097	0.542013	0.651681	0.785894	0.561354	0.123026	0.46252	0.490847	0.550421	0.434052	0.729588	1.03517	1.08512	1.22575	0.521125	-0.492317	0.713145	-0.77933	1.00808	1.23973	0.375057	0.717827	0.886865	-0.560763	0.15725	0.58213	0.97412	0.712423	0.314549	-0.483833	-0.300255	0.932101	0.231081	0.369423	0.639658	-0.058645	1.07266	2349	P39687;O43423;O95626	P39687	Acidic leucine-rich nuclear phosphoprotein 32 family member A	ANP32A	ANP32A	0.561354	0.610894	0.0495396
0.384086	0.424372	0.0952849	0.243464	0.490709	0.511507	0.63386	0.589541	0.456439	0.00939427	0.283937	0.431832	0.210816	0.156439	0.327225	0.848473	0.849842	0.0946165	-0.85689	-0.404243	0.277435	-0.748692	0.914378	0.458067	0.319387	0.443553	0.620657	-0.424697	0.412933	0.549683	1.00528	0.259392	0.0973376	-0.614813	-0.179477	0.885091	0.0765542	-0.124765	0.580646	-0.406366	0.238354	5835	Q92688;Q92688-2;O75952-4;O75952-3	Q92688;Q92688-2	Acidic leucine-rich nuclear phosphoprotein 32 family member B	ANP32B	ANP32B	0.384086	0.268414	-0.115673
0.161748	0.0884722	0.221543	0.239363	-0.377353	-0.41551	0.265055	0.426224	-0.234774	-0.219915	0.145188	0.414738	-0.0120917	0.37536	0.145546	0.644321	0.0635221	0.123879	-0.591577	-1.22831	0.170316	-1.04226	-0.184704	0.322058	0.323349	-0.160982	0.628429	-0.505248	-0.916338	0.115167	0.306059	0.038974	-0.444423	-0.329715	-0.460005	0.0550405	-0.592006	-0.403286	0.419283	-0.564275	-0.583366	6666	Q9BTT0;Q9BTT0-3;Q9BTT0-2	Q9BTT0;Q9BTT0-3;Q9BTT0-2	Acidic leucine-rich nuclear phosphoprotein 32 family member E	ANP32E	ANP32E	0.145546	-0.172843	-0.318389
0.913689	0.72054	1.18918	0.887755	0.88347	0.797816	1.53929	0.601718	1.17229	0.874792	0.535747	0.751437	0.694747	0.416136	0.978953	0.600786	0.969594	0.690659	0.600826	0.829243	0.84375	1.14494	0.98916	0.850124	0.934868	1.12803	1.06418	1.34329	1.41851	0.727557	0.682299	1.48617	1.36645	0.96177	1.29034	0.910202	1.22694	0.766928	0.767215	0.992358	0.583424	6517	Q99798	Q99798	Aconitate hydratase, mitochondrial	ACO2	ACO2	0.874792	0.948319	0.0735271
0.374277	-0.117905	0.429317	1.04547	0.294187	1.42024	0.686419	1.07394	-0.384857	-0.0381677	0.977975	1.10128	1.22972	0.831182	0.283179	1.01465	0.447781	0.633259	1.4526	-1.08244	0.782956	-0.775023	0.209508	-0.298448	1.44241	-0.171705	0.289319	-0.141351	-0.44965	0.747072	0.561845	1.06046	-0.488509	0.454811	0.0675033	-0.0919599	-0.146594	-0.580664	1.01709	-0.876316	0.272268	3092	P68032;P62736;P68133;P63267;P63267-2	P68032;P62736;P68133;P63267;P63267-2	Actin, alpha cardiac muscle 1;Actin, aortic smooth muscle;Actin, alpha skeletal muscle;Actin, gamma-enteric smooth muscle	ACTC1;ACTA2;ACTA1;ACTG2	ACTC1	0.686419	0.240888	-0.445531
0.227276	-0.187464	0.393948	0.920206	0.331187	1.28948	0.602105	0.875893	-0.375087	-0.0521374	0.86411	0.950245	1.06554	0.756635	0.245813	0.94568	0.359753	0.53552	1.41599	-0.997248	0.489177	-0.708857	0.201871	-0.371531	1.28837	-0.29782	0.278494	-0.301654	-0.469532	0.702669	0.409067	0.963212	-0.551485	0.417442	0.105673	-0.108447	-0.136235	-0.633932	0.839114	-0.934646	0.187048	2923	P60709	P60709	Actin, cytoplasmic 1;Actin, cytoplasmic 1, N-terminally processed	ACTB	ACTB	0.602105	0.194459	-0.407645
0.347087	0.344364	0.422982	0.703547	0.379169	1.02969	0.886474	0.334695	-0.371217	-0.246636	0.871113	0.88728	1.01638	0.763817	0.200361	0.855078	0.262433	0.544797	1.22464	-0.813544	0.0709201	-0.796015	0.0427688	-0.328948	1.0317	0.0708381	0.454104	-0.166056	-0.480088	0.895281	0.635725	0.877442	-0.296121	0.511622	0.22002	-0.00799598	-0.0617951	-0.600551	0.163732	-0.702425	0.511389	3082	P63261;Q6S8J3;A5A3E0	P63261	Actin, cytoplasmic 2;Actin, cytoplasmic 2, N-terminally processed	ACTG1	ACTG1	0.422982	0.117326	-0.305656
0.756372	0.820349	-0.026039	-0.221911	0.752087	-0.0566973	-0.4248	-0.336265	0.558854	0.161019	-0.0893653	-0.123244	0.0324337	-0.200158	-0.133899	-0.0249023	0.452356	0.630303	0.353842	0.427691	-0.0644097	0.421362	0.324273	0.594266	-0.182729	0.269921	0.928849	0.989923	1.02944	-0.235204	0.00258705	-0.449355	0.846956	0.1309	0.32296	0.478783	0.156332	0.389219	0.209807	0.952119	0.526782	1146	O96019;O96019-2	O96019;O96019-2	Actin-like protein 6A	ACTL6A	ACTL6A	-0.0566973	0.37153	0.428228
0.0188962	-0.00500192	0.896114	0.367188	0.320583	0.435618	1.14373	0.556561	0.00785797	0.474486	0.842331	0.735307	0.706942	0.725159	0.630244	0.531307	0.213157	0.646638	0.833912	-0.202175	0.458708	0.0413675	0.428739	0.580253	0.920206	0.60863	0.185835	-0.240962	0.0520555	0.77614	0.319273	0.779583	0.560453	0.797644	-0.148919	-0.187836	0.249708	0.481071	0.647182	-0.304525	0.599033	7642	Q9NZ32	Q9NZ32	Actin-related protein 10	ACTR10	ACTR10	0.556561	0.469889	-0.0866716
2.2675	2.33082	-0.0144436	-0.00247553	1.38059	0.179162	-0.846636	NaN	1.54335	0.842618	0.290946	0.189869	0.43748	-0.168293	1.09786	0.292239	1.60282	1.40662	1.17567	1.95763	1.31121	1.54905	1.72735	1.31111	-0.557038	1.14676	2.30195	2.38373	2.34625	0.461952	1.0504	-0.622378	3.22077	0.986328	1.36862	1.81974	0.895514	1.2539	0.977499	1.58133	1.67671	5497	Q8NFD5;Q8NFD5-2;Q8NFD5-3;Q8NFD5-4	Q8NFD5;Q8NFD5-2;Q8NFD5-3;Q8NFD5-4	AT-rich interactive domain-containing protein 1B	ARID1B	ARID1B	0.364213	1.33991	0.975702
-0.306028	0.248859	-0.439894	0.0653123	-0.0488786	0.685781	-0.51729	-1.47817	-1.58595	-1.28219	0.0298716	-0.0980177	0.329562	NaN	NaN	-1.07893	-0.313506	-0.391626	0.275816	NaN	-0.594251	NaN	NaN	-0.569161	-0.00218965	-0.537767	-0.234958	-0.0265214	0.787034	0.459504	-1.26205	1.56629	-0.202917	-0.177904	0.424833	-0.844402	-0.471678	-0.699432	2.70354	-0.484834	0.634037	5840	Q92747;Q92747-2	Q92747;Q92747-2	Actin-related protein 2/3 complex subunit 1A	ARPC1A	ARPC1A	-0.0980177	-0.234958	-0.136941
0.112492	-0.0636723	0.699129	0.912955	0.584209	1.06583	0.880424	0.865571	-0.453589	0.428265	1.049	0.793083	0.972029	0.92472	0.544732	0.826822	0.359969	0.326283	0.863924	-0.676727	0.643736	-0.461842	0.159994	-0.35726	1.17648	0.308693	0.156088	-0.184098	-0.266923	0.83028	0.377269	1.04215	-0.143084	0.956215	0.1993	-0.251343	0.375907	-0.0291775	1.03766	-1.06957	0.181687	441	O15143	O15143	Actin-related protein 2/3 complex subunit 1B	ARPC1B	ARPC1B	0.793083	0.253997	-0.539086
-0.0245255	-0.111703	0.587061	0.909007	0.561775	0.975293	0.756455	0.943572	-0.691477	0.374756	0.916302	0.749883	0.83388	0.723095	0.488195	0.716668	0.242814	0.213657	0.653528	-0.729255	0.795945	-0.545024	0.165694	-0.470449	1.08077	0.0877202	0.13004	-0.324175	-0.283038	0.706682	0.407413	0.959283	-0.2476	0.920443	0.368383	-0.24592	0.222777	-0.0809656	1.04458	-1.05841	0.163295	442	O15144	O15144	Actin-related protein 2/3 complex subunit 2	ARPC2	ARPC2	0.723095	0.189675	-0.53342
-0.0585479	-0.08481	0.613413	0.957382	0.424951	1.0196	0.740778	0.86918	-0.692156	0.292473	0.893733	0.806728	0.871777	0.782172	0.456791	0.675639	0.344237	0.232674	0.780213	-0.854116	0.906875	-0.635138	0.151299	-0.427757	1.06203	0.148278	0.133683	-0.369001	-0.252349	0.699184	0.444083	0.919807	-0.313804	0.913128	0.297607	-0.254393	0.245687	-0.107016	1.05476	-1.0564	0.0975801	443	O15145	O15145	Actin-related protein 2/3 complex subunit 3	ARPC3	ARPC3	0.740778	0.191987	-0.548792
-0.0265571	-0.101064	0.652657	0.946588	0.367875	0.91391	0.753208	0.865292	-0.610004	0.302124	0.969467	0.784577	0.859384	0.76981	0.373117	0.663743	0.305016	0.161044	0.727182	-0.728253	0.686552	-0.617344	0.207445	-0.503196	1.05539	0.185361	0.0222143	-0.380265	-0.23843	0.676094	0.326549	0.944082	-0.322961	0.900394	0.259169	-0.367866	0.197827	-0.214154	0.961621	-1.19084	0.10502	2909	P59998;P59998-3;P59998-2;P59998-4	P59998;P59998-3;P59998-2	Actin-related protein 2/3 complex subunit 4	ARPC4	ARPC4	0.753208	0.191594	-0.561614
-0.0468647	0.0314553	0.793833	1.06564	0.780623	0.991923	1.17811	1.1618	-0.49355	0.47277	1.11371	0.939626	1.03495	0.801502	0.560364	0.843598	0.218831	0.36763	0.928102	-0.594873	1.08606	-0.509156	0.216035	-0.399724	1.07437	0.217949	0.205256	-0.293246	0.00287389	1.04063	0.843019	1.10988	-0.152988	0.999411	0.501372	0.0561441	0.255629	-0.0333267	1.14283	-0.993874	0.730288	500	O15511;O15511-2	O15511;O15511-2	Actin-related protein 2/3 complex subunit 5	ARPC5	ARPC5	0.801502	0.23723	-0.564272
-0.135828	-0.121108	-0.220829	0.250844	-0.342322	0.513262	0.463836	0.55696	-1.20548	-0.452758	0.175338	0.0818288	0.271871	0.232196	-0.391126	0.117345	-0.10945	-0.0911517	-0.423944	-0.279142	-0.103354	-0.722441	-0.347238	-1.06007	0.557374	-0.592501	0.0916699	0.179533	-0.37821	0.18493	-0.271863	-0.398366	-0.415046	-0.180283	0.663711	-0.612925	-0.623819	-0.68223	-0.249139	-1.10063	-0.250073	6545	Q9BPX5	Q9BPX5	Actin-related protein 2/3 complex subunit 5-like protein	ARPC5L	ARPC5L	0.0818288	-0.275503	-0.357332
-0.04958	-0.0616341	0.6174	0.96431	0.532953	0.957144	0.765763	0.880745	-0.600808	0.407429	0.947213	0.842953	0.893278	0.758958	0.459975	0.737677	0.293024	0.21568	0.70403	-0.765015	0.764148	-0.629741	0.11586	-0.375272	1.10432	0.208475	0.146449	-0.211174	-0.243477	0.659786	0.338588	0.975891	-0.253825	0.917733	0.294686	-0.256746	0.270304	-0.114474	1.05095	-1.06973	0.184156	2948	P61158;Q9P1U1-2;Q9C0K3	P61158	Actin-related protein 3	ACTR3	ACTR3	0.758958	0.212078	-0.546881
NaN	0.866253	0.0142129	-0.792887	-0.510959	-0.55956	-0.0451521	0.0786678	0.80959	0.0611767	NaN	0.0522012	-0.427965	-0.0744095	0.097019	0.242521	0.604066	0.774459	-0.251575	0.440394	0.201883	0.149639	0.261899	0.606265	-0.268523	0.658741	0.363568	0.859932	0.28568	0.810138	-0.595366	-0.267565	0.297677	0.160245	0.3994	0.338605	0.0802324	-0.0279122	-1.3676	0.1136	-0.537287	7165	Q9H9F9	Q9H9F9	Actin-related protein 5	ACTR5	ACTR5	0.0142129	0.25221	0.237997
0.0355139	0.632945	0.0335595	NaN	0.683331	NaN	-0.139699	0.168397	0.0867972	0.457689	NaN	-0.199866	0.0301185	-0.0126762	0.451018	0.259962	0.620165	0.3505	NaN	0.576989	0.1398	0.374858	0.0985677	0.743446	-0.285607	0.0365888	0.427247	0.745579	0.665249	0.342566	NaN	-0.351232	0.678027	NaN	0.326814	1.26848	0.0339497	0.587156	NaN	NaN	0.51909	7154	Q9H981;Q9H981-2;Q9H981-3	Q9H981;Q9H981-2	Actin-related protein 8	ACTR8	ACTR8	0.0611556	0.374858	0.313702
-0.292639	0.422309	-0.0322339	-0.326218	-0.158267	-0.374981	0.33588	-0.263144	-0.355784	-0.080039	-0.343783	-0.30138	-0.399196	-0.206446	-0.496309	-0.488123	-0.0529786	-0.271609	-0.704261	-0.0223209	-0.406484	-0.0554256	-0.699112	-0.433833	-0.237792	-0.0645222	-0.205254	0.278215	0.0931083	-0.614237	-0.39844	-0.218733	-0.625384	-0.00736611	0.264766	-0.260613	-0.225461	0.16374	-0.731184	0.454146	-0.472624	2788	P53999	P53999	Activated RNA polymerase II transcriptional coactivator p15	SUB1	SUB1	-0.292639	-0.231626	0.0610123
-0.394019	-0.572723	-0.0103208	-0.212858	-0.289935	0.178364	-0.122707	-0.358676	-0.251421	-0.496272	-0.477312	-0.363468	-0.320951	-0.598797	-0.0606763	-1.2373	-0.96818	-0.0927342	-0.160783	0.223992	-0.532818	0.17464	-0.185161	-0.835249	0.041696	-0.0565003	-0.591112	0.277172	-0.269566	0.0648192	-0.357472	-0.270983	0.67464	NaN	-0.245237	NaN	0.201558	0.114438	-0.743685	NaN	-0.322754	3968	Q15650	Q15650	Activating signal cointegrator 1	TRIP4	TRIP4	-0.320951	-0.185161	0.13579
NaN	-0.24554	-0.0972694	0.000406165	-0.571664	NaN	NaN	-0.215924	-0.51202	0.0388281	-0.328075	-0.442685	NaN	NaN	-0.0196274	NaN	-0.706704	NaN	-0.106087	0.0850316	NaN	NaN	0.037354	-0.281408	NaN	-0.344417	-0.287767	-0.57098	0.384209	-0.233953	NaN	-0.078815	-0.299183	NaN	NaN	NaN	-0.141704	0.244584	NaN	NaN	-0.191801	5378	Q8N9N2-2;Q8N9N2	Q8N9N2-2;Q8N9N2	Activating signal cointegrator 1 complex subunit 1	ASCC1	ASCC1	-0.230732	-0.191801	0.0389312
-0.765452	-0.396566	-0.117489	-0.18587	-0.379335	-0.177146	-0.614171	0.0456044	-0.651842	-0.156653	0.0602638	-0.116869	-0.0419412	-0.269913	-0.00957006	-0.952483	-0.568257	-0.000536073	-0.026881	-0.0282402	-0.44243	-0.0759962	-0.285898	-0.224347	-0.338067	-0.0769258	-0.574715	-0.111727	0.261906	0.015397	-0.253098	-0.142336	-0.049864	-0.454117	-0.304254	-0.730556	0.247057	0.39317	-0.620656	-0.434681	-0.537404	6981	Q9H1I8;Q9H1I8-3;Q9H1I8-2	Q9H1I8;Q9H1I8-3	Activating signal cointegrator 1 complex subunit 2	ASCC2	ASCC2	-0.177146	-0.238722	-0.061576
-1.00792	-0.525616	-0.227089	-0.16803	-0.706789	-0.410743	-0.342563	-0.34083	-0.538521	-0.275964	-0.333206	-0.274101	-0.3364	-2.37099e-05	-0.355102	-1.35855	-0.785547	-0.174339	-0.306428	0.145325	-0.644391	-0.1627	-0.548143	-0.485937	-0.484736	-0.277853	-0.585856	-0.432519	-0.04705	-0.0848083	-0.596724	-0.505327	-0.278315	-0.203267	-0.0698603	-0.691017	0.0649571	0.124779	-0.438671	-0.38547	-0.420871	5278	Q8N3C0;Q8N3C0-4;Q8N3C0-3	Q8N3C0	Activating signal cointegrator 1 complex subunit 3	ASCC3	ASCC3	-0.34083	-0.403171	-0.0623406
0.235552	1.22066	NaN	-0.272986	1.11339	0.371995	-0.0683105	0.166388	1.02555	0.636309	0.19154	NaN	0.0847798	-0.169134	0.743246	0.491468	NaN	0.726909	-1.24154	0.718917	0.70691	1.00859	0.939326	1.04252	NaN	NaN	0.719675	0.657515	NaN	NaN	1.0276	NaN	0.860877	0.306506	NaN	0.9539	0.52294	NaN	NaN	1.08869	1.25581	4690	Q6VMQ6-5;Q6VMQ6;Q6VMQ6-4;Q6VMQ6-2	Q6VMQ6-5;Q6VMQ6;Q6VMQ6-4;Q6VMQ6-2	Activating transcription factor 7-interacting protein 1	ATF7IP	ATF7IP	0.235552	0.726909	0.491357
-0.786261	-0.656572	-1.70689	-0.73868	-1.35261	-0.323108	0.133035	-0.495984	-1.03982	-0.919455	-0.32569	-0.609432	-0.821969	-1.07527	-1.1974	-0.674045	-0.623783	-0.977682	-1.13392	-1.32491	-1.31042	-1.70709	-0.356387	-0.386321	-0.740173	-0.61944	-1.0484	-1.19108	-0.96886	-0.478417	-0.887933	-0.520339	-1.17702	-1.69236	-1.99651	-1.00561	-1.10052	-1.01811	-1.01001	-1.48717	-0.565976	1054	O95433;O95433-2	O95433;O95433-2	Activator of 90 kDa heat shock protein ATPase homolog 1	AHSA1	AHSA1	-0.786261	-1.00781	-0.221552
-1.17879	-0.647874	NaN	-2.10174	-0.921606	-1.10084	-0.916726	NaN	-1.27205	-1.29884	-2.16442	NaN	-1.06461	NaN	-1.55129	-1.25727	-0.625487	-0.899079	-1.78073	-0.0770806	NaN	-0.855814	-1.12562	-1.09108	NaN	-1.69669	-0.831462	-0.131932	-0.159229	-2.06888	-1.2233	NaN	-0.490137	-1.29885	-0.414043	-0.790256	-1.42867	-0.752869	NaN	NaN	-1.02882	8035	Q9ULW3	Q9ULW3	Activator of basal transcription 1	ABT1	ABT1	-1.17879	-0.899079	0.279716
-0.34852	-0.297112	0.504376	0.868984	-0.450324	-0.102364	0.755011	0.0934188	-1.77482	-0.842155	0.75075	0.687407	0.604515	0.665124	0.00914919	-0.437094	-1.00149	-0.750735	-1.13363	-1.13221	-0.0839659	-0.31014	-0.228976	0.122887	0.553286	-0.363016	-0.161964	-0.447619	-1.93176	0.828748	-0.879416	0.602382	-1.11166	0.164441	-0.349694	-1.32577	0.0504119	-0.414774	-0.45479	-1.00794	-0.276867	3472	Q12979-2	Q12979-2	Active breakpoint cluster region-related protein	ABR	ABR	0.0934188	-0.388895	-0.482314
0.412724	0.221133	-1.00481	-0.720665	0.264153	-0.269102	-1.03152	-1.20772	0.120053	-0.717901	-1.00568	-0.945775	-0.443277	-1.05711	-0.124877	-0.535681	0.211008	0.513756	0.297692	0.683543	-0.213387	0.160739	0.813565	0.677675	-0.899606	-0.25848	0.975552	1.90159	0.714876	-0.666045	-0.18302	-1.35898	0.535142	-0.310965	0.652719	0.608242	-0.227969	0.381889	-0.435426	0.533775	0.182181	1497	P09874	P09874	Poly [ADP-ribose] polymerase 1	PARP1	PARP1	-0.717901	0.25435	0.97225
-0.292518	-0.320596	-0.150936	-0.347013	-0.107158	-0.215964	-0.398479	0.0265153	0.209072	0.342512	-0.497643	-0.849218	-0.545586	-0.520022	-0.206121	-0.273624	-0.125574	-0.552093	-0.230019	0.183118	-0.118567	0.221557	-0.315127	-0.385535	-0.227899	0.156972	-0.141034	0.563334	0.290812	-0.584365	-0.270389	-0.133473	0.257413	0.166979	0.0528607	0.000561623	-0.0653389	-0.0296893	-0.306123	0.029267	-0.102539	340	O14561	O14561	Acyl carrier protein, mitochondrial	NDUFAB1	NDUFAB1	-0.292518	-0.110553	0.181964
0.323865	-0.843832	-0.431109	0.163993	-0.295239	-0.00784079	0.533011	0.110783	-1.12416	-0.578666	0.172975	0.394506	0.43135	0.196396	-0.207587	0.205477	-0.188048	0.269769	0.150922	-1.08003	0.217114	-0.606658	0.0490525	-0.301207	0.386373	-1.00053	-0.825061	-0.47328	-0.604902	0.227197	-0.264151	0.518457	-0.179023	-0.0628152	-0.826038	-0.711581	-0.775043	-1.01438	0.769581	-0.830077	0.161796	1666	P13798	P13798	Acylamino-acid-releasing enzyme	APEH	APEH	0.110783	-0.226099	-0.336882
-0.297236	-0.49134	-0.336568	0.650737	-0.579002	-0.661478	-0.00425426	-0.760831	0.261119	-0.106892	-0.501408	-0.706879	-0.432805	-0.465025	-0.704416	-0.356937	0.0735111	-0.318991	0.095256	0.0425228	-0.527976	-0.234442	-0.0823063	1.58532	-0.460884	-0.110672	-0.39692	0.383482	0.902582	-0.484178	0.245834	-0.413851	1.73194	-0.129534	1.13458	0.296583	-0.490857	-0.10345	-0.338901	0.185996	-0.270736	4528	Q6JQN1;Q6JQN1-2;Q6JQN1-4	Q6JQN1;Q6JQN1-2	Acyl-CoA dehydrogenase family member 10	ACAD10	ACAD10	-0.465025	-0.107061	0.357964
-1.14545	-0.550401	0.134949	-0.413253	-0.0486012	-0.437621	-0.127144	-0.206859	0.303511	0.133928	-0.347126	-0.64187	-0.489773	-0.554003	-0.0762748	-0.0698336	0.00513917	-0.870597	0.0447136	0.312349	-0.155925	0.233908	-0.388189	-0.505247	-0.284169	-0.0101502	0.000904421	0.0405835	-0.0331084	-1.18673	0.104441	0.0745348	0.220065	0.151431	0.234256	0.191814	0.269427	-0.226637	-0.213104	-0.0252495	-0.432217	7129	Q9H845	Q9H845	Acyl-CoA dehydrogenase family member 9, mitochondrial	ACAD9	ACAD9	-0.347126	-0.00462291	0.342503
-1.12183	-1.35981	-2.56553	-2.16392	-0.426292	-1.52563	-1.9176	-1.99586	-0.384583	-1.34535	-2.63544	-2.32391	-1.78615	-2.65466	-1.53858	-1.26361	-0.861476	-0.936319	-0.766595	-0.21953	-1.33057	-0.53619	-0.558682	-0.437941	-2.23791	-1.85147	-0.492928	-0.396514	-0.230053	-2.19244	-0.723425	-1.78453	-0.204941	-0.905244	-0.0498171	-0.395352	-1.62153	-1.06505	-0.951306	-0.34921	-0.95991	8287	Q9Y3T9	Q9Y3T9	Nucleolar complex protein 2 homolog	NOC2L	NOC2L	-1.78615	-0.814036	0.972117
-1.39287	-1.13463	-2.62434	-2.24887	-0.91684	-1.46526	-2.18561	-1.7885	-0.120244	-1.24533	-2.2356	-2.33914	-2.06818	-2.37242	-1.36682	-1.40947	-0.678112	-1.30416	-1.23571	-0.260665	-0.9142	-0.690761	-0.431193	-0.821961	-2.21103	-1.58928	-0.644416	-0.254298	-0.0952011	-1.90834	-0.727082	-1.96604	-0.466549	-0.811273	-0.281556	-0.436027	-1.07728	-0.92547	-1.29638	-0.448048	-1.12879	8255	Q9Y3B9	Q9Y3B9	RRP15-like protein	RRP15	RRP15	-1.7885	-0.816617	0.971881
1.00165	0.717316	0.377729	0.33651	1.2941	0.446615	0.0151547	-0.438488	1.14444	0.537106	0.238667	0.403461	0.619307	0.1254	0.826961	0.718697	1.5327	0.973972	1.12205	1.88114	1.23397	0.951118	1.32614	1.19025	0.203074	0.870638	0.729279	0.966976	1.83424	0.635794	1.00852	0.394425	1.74448	-0.155705	1.45695	1.76582	0.838759	0.380732	0.967315	0.947315	1.17349	4181	Q4G176	Q4G176	Acyl-CoA synthetase family member 3, mitochondrial	ACSF3	ACSF3	0.446615	0.970643	0.524029
0.901311	1.36901	1.67374	1.46156	1.56861	1.3089	0.663325	2.00854	1.87955	2.73898	1.12874	1.21096	1.21966	1.33222	1.65266	1.38009	1.94189	0.38742	0.484796	0.661129	2.06982	NaN	0.730251	0.544204	1.48769	2.0845	0.979335	1.42617	1.25254	0.864706	1.62448	0.0856513	1.52228	2.59263	2.05959	2.00607	1.8393	1.97108	2.13194	0.746475	0.491479	5808	Q92604	Q92604	Acyl-CoA:lysophosphatidylglycerol acyltransferase 1	LPGAT1	LPGAT1	1.36901	1.42617	0.0571667
-1.46075	-0.114234	0.507892	0.547051	0.13997	NaN	0.793732	0.188013	0.0530024	0.39156	NaN	0.141937	0.0510729	0.169221	1.12892	0.178569	-0.319717	-0.968482	-0.357557	0.162588	-0.548227	NaN	-0.562973	-0.208237	-0.286391	0.890977	-1.09903	NaN	0.452174	0.453198	0.475806	0.748619	-0.49379	-0.0921293	-0.317371	-0.420856	0.652381	0.542786	NaN	-0.0921116	-0.0610784	4366	Q5T8D3-2;Q5T8D3-3;Q5T8D3-4;Q5T8D3;Q8NAG6-1	Q5T8D3-2;Q5T8D3-3;Q5T8D3-4;Q5T8D3	Acyl-CoA-binding domain-containing protein 5	ACBD5	ACBD5	0.169221	-0.0921293	-0.26135
NaN	0.899013	-1.34493	0.409438	0.34839	-0.356081	0.711501	0.723217	0.296061	-0.427782	0.888547	1.00472	0.453259	-0.00803704	0.0485493	1.37543	0.358046	-0.176448	-0.958579	-1.10036	0.918817	-0.693883	0.16324	0.48977	0.667975	-0.59296	-0.17667	NaN	-0.137015	0.789104	1.50144	0.806853	-1.306	-0.0986295	-1.20644	0.478441	-1.49602	-1.64837	0.304602	NaN	0.415349	1374	P07108;P07108-3;P07108-2;P07108-4;P07108-5;P07108-6	P07108;P07108-3;P07108-2;P07108-4;P07108-5	Acyl-CoA-binding protein	DBI	DBI	0.378914	0.0323053	-0.346609
-1.10981	-0.959646	-1.71332	-1.91165	-0.749142	-1.53399	-2.1679	-1.71671	-0.487902	-1.10069	-1.80793	-2.14983	-1.77794	-2.15427	-1.27308	-1.19239	-0.675599	-1.12577	-1.1244	-0.252511	-0.7029	-0.614139	-0.575302	-0.786155	-2.15789	-1.28412	-0.531491	-0.203534	-0.501133	-1.98343	-0.893321	-1.67386	-0.501168	-0.712908	-0.0225782	-0.539389	-1.64975	-1.06123	-1.08258	-0.261951	-0.998616	3930	Q15397	Q15397	Pumilio domain-containing protein KIAA0020	KIAA0020	KIAA0020	-1.71332	-0.749531	0.963784
1.21928	0.784078	0.557929	0.255984	1.40418	1.10373	-0.159696	0.152491	1.14156	0.778944	-0.280628	0.281599	0.0730361	0.230641	0.764941	0.448485	1.09071	1.18259	0.545715	1.37522	1.00515	0.7914	0.890315	0.515125	0.167931	0.40713	0.278239	0.945403	1.7186	0.0688323	0.722321	0.872099	1.44091	1.00689	1.05231	0.856026	0.852538	0.70533	0.993324	1.17562	1.17046	7311	Q9NPJ3;Q9NPJ3-2	Q9NPJ3;Q9NPJ3-2	Acyl-coenzyme A thioesterase 13;Acyl-coenzyme A thioesterase 13, N-terminally processed	ACOT13	ACOT13	0.557929	0.881207	0.323278
-1.12148	-0.698086	-1.94822	-1.89027	-0.546716	-1.32502	-1.85915	-1.77878	-0.067655	-1.20091	-1.72664	-1.92351	-1.63982	-2.12837	-1.5814	-1.2811	-0.391875	-0.883435	-0.854834	-0.307324	-0.791788	-0.675719	-0.281759	-0.409907	-1.49885	-1.07473	-0.55303	-0.172426	-0.238077	-1.80823	-0.680874	-1.49843	-0.197461	-0.970248	-0.0800167	0.0265048	-1.16871	-0.609842	-1.02352	-0.172477	-1.128	5886	Q92979	Q92979	Ribosomal RNA small subunit methyltransferase NEP1	EMG1	EMG1	-1.63982	-0.678297	0.961524
-0.470642	-0.484164	-0.10692	0	-0.184217	-0.90528	0.0751261	-0.410948	-0.267452	0.126911	-0.163401	-0.0705754	-0.593498	0.109201	-0.334071	-0.919748	-0.411544	-0.531412	0.0192963	0.121231	-0.887844	0.146708	-0.666192	0.171707	-0.731579	0.315617	-1.54413	-0.279029	-0.534026	-0.293806	-0.934828	0.816005	-0.605995	0.127056	-0.523545	-0.649768	0.524995	-0.0212813	-0.978126	-0.0720737	-0.255441	367	O14734	O14734	Acyl-coenzyme A thioesterase 8	ACOT8	ACOT8	-0.184217	-0.352675	-0.168457
0.928853	1.09458	1.25891	1.21141	1.18015	1.2138	0.381934	1.59235	1.87299	1.9863	1.0816	0.923737	0.932594	1.09221	1.55568	1.32491	1.36051	0.815895	1.04636	1.29377	1.22677	1.55266	0.8602	0.66612	0.971706	1.82811	0.892252	0.935978	1.40904	0.892517	1.81644	1.17329	1.36062	1.04552	1.57887	1.77965	1.7348	1.44838	0.911029	0.912528	1.16841	8229	Q9Y305-2;Q9Y305;Q9Y305-4;Q9Y305-3	Q9Y305-2;Q9Y305;Q9Y305-4;Q9Y305-3	Acyl-coenzyme A thioesterase 9, mitochondrial	ACOT9	ACOT9	1.18015	1.20003	0.0198803
0.851862	1.08514	0.61079	0.414035	1.29383	0.920818	0.243304	0.466492	1.34396	0.795936	0.216371	0.372452	0.475365	0.599008	0.761499	0.642395	1.14344	0.535304	1.14005	1.42428	0.842892	1.1093	1.53184	1.05966	0.359289	0.701318	0.824564	1.19003	0.59251	0.536522	1.19747	0.618275	1.80423	0.930706	1.269	1.30451	0.817213	1.13841	0.746121	1.00844	1.18046	4217	Q53H12;Q53H12-2	Q53H12	Acylglycerol kinase, mitochondrial	AGK	AGK	0.61079	1.03405	0.423262
0.541882	1.79291	1.53348	1.01115	0.88606	NaN	1.12029	2.25777	1.14788	2.35889	1.33133	1.47944	1.23081	0.697131	1.2361	0.495585	0.647697	-0.34411	-0.394461	NaN	1.97392	1.85744	NaN	1.51789	1.71141	1.94981	-0.953029	NaN	NaN	1.92704	0.881214	1.9959	NaN	2.17855	0.370131	-1.76138	1.26378	1.86241	1.13907	0.740601	-0.242981	2072	P28039;P28039-2	P28039;P28039-2	Acyloxyacyl hydrolase;Acyloxyacyl hydrolase small subunit;Acyloxyacyl hydrolase large subunit	AOAH	AOAH	1.23345	1.13907	-0.0943817
0.787546	-0.139589	NaN	-0.254216	-0.0438119	1.08597	0.753818	0.0292835	0.437516	-1.73627	0.39371	0.528308	0.309891	-0.319361	0.0951153	1.1632	1.10755	1.41796	0.263959	-1.35819	-0.0945353	-0.771583	0.726485	0.89298	0.079014	-2.32554	0.229635	NaN	0.114947	0.382981	0.972929	-0.31964	0.0701461	NaN	-0.918568	0.021948	NaN	NaN	0.425876	NaN	0.571117	1383	P07311;P07311-2	P07311	Acylphosphatase-1	ACYP1	ACYP1	0.202503	0.229635	0.0271317
-0.266849	-0.524306	-0.600607	0.161093	0.0936221	0.353206	-0.0681619	-0.107631	-0.109189	-0.54574	0.340528	0.21144	0.144714	0.0227454	-0.204654	0.288984	-0.0754286	-0.152689	-0.0506989	-0.415301	0.148817	-0.499576	0.372799	-0.472973	0.232585	-0.825098	-0.441325	-0.572159	-0.00152273	0.0339875	0.0281887	0.522423	-0.224266	-0.694733	-0.728837	-0.349519	-0.647255	-1.03086	0.259623	-0.531974	0.311519	868	O75608-2;O75608	O75608-2;O75608	Acyl-protein thioesterase 1	LYPLA1	LYPLA1	-0.0681619	-0.188478	-0.120316
0.217094	-0.0790279	-0.598194	0.786922	0.278479	1.01902	0.990465	0.623655	-0.074806	-1.04083	1.05522	0.882712	0.697864	0.761312	0.166326	0.978937	0.639514	1.2189	0.560334	-0.9426	0.502491	-1.03826	0.982618	0.0331408	0.969996	-1.17594	0.1505	-0.857457	0.0633515	0.792771	0.528852	0.873556	-0.0673126	-0.952999	-0.493943	-0.000336435	-1.00434	-0.702045	0.63548	NaN	0.713328	1038	O95372	O95372	Acyl-protein thioesterase 2	LYPLA2	LYPLA2	0.623655	0.1505	-0.473155
1.84347	1.33786	0.740885	0.301775	1.40655	0.794485	1.16131	0.761163	1.43296	1.21742	0.269589	0.328041	0.435787	0.167654	1.19565	0.678763	0.973015	0.558057	0.79457	1.13754	1.3341	0.951805	1.10643	0.998955	0.638253	0.784729	0.66552	1.28217	1.81367	0.304468	0.674308	0.797737	1.35653	1.22255	1.26873	1.24146	0.745682	-0.00774127	0.701072	1.04469	1.00993	4597	Q6P587;Q6P587-2;Q6P587-3	Q6P587;Q6P587-2;Q6P587-3	Acylpyruvase FAHD1, mitochondrial	FAHD1	FAHD1	0.794485	0.96241	0.167925
0.1316	0.340557	-0.263202	0.669618	-0.504635	0.549577	0.162543	0.285846	-0.374121	-0.076025	0.742938	0.733678	0.228344	0.286883	0.166235	0.243972	-0.250391	0.382709	0.233028	-0.279142	-0.606007	-1.31235	0.57345	0.233705	0.522959	-0.267278	0.463766	NaN	-0.638961	0.873289	-0.160682	0.819779	-1.06818	NaN	NaN	0.00304946	-0.180918	NaN	NaN	NaN	0.60701	2475	P46108-2;P46108	P46108-2;P46108	Adapter molecule crk	CRK	CRK	0.228344	0.118039	-0.110306
0.715357	-0.113774	0.558386	1.343	0.585109	0.567251	1.25658	1.08554	-0.214291	0.638003	1.21841	1.31072	1.17815	0.800942	0.680432	1.05553	0.685936	0.753024	0.533014	-0.700294	0.793563	-0.431351	1.02491	0.184224	1.03551	0.236041	0.249541	-0.466991	-0.267268	1.09336	0.862658	1.72636	-0.691238	-0.0849955	-0.15011	-0.0528487	0.336405	0.238973	0.688329	-0.443672	0.446208	7530	Q9NVZ3;Q9NVZ3-2;Q9NVZ3-3;Q9NVZ3-4	Q9NVZ3;Q9NVZ3-2;Q9NVZ3-3;Q9NVZ3-4	Adaptin ear-binding coat-associated protein 2	NECAP2	NECAP2	0.715357	0.292973	-0.422384
0.386272	-0.164645	-1.34325	0.270193	-0.168275	0.461458	0.107995	-0.298827	-1.27378	-1.64901	0.175493	0.127432	0.279702	0.0950611	-0.501032	0.210976	-0.171927	0.386426	0.101183	-1.63265	-0.0268261	-1.79015	0.545345	-0.101298	0.534061	-1.8143	-0.57661	-1.19356	-0.747824	0.161922	-0.190585	0.536377	-0.648997	-1.21325	-1.14256	-0.539504	-1.52116	-1.77229	0.190243	-1.35843	0.265542	1398	P07741;P07741-2	P07741;P07741-2	Adenine phosphoribosyltransferase	APRT	APRT	0.0950611	-0.365044	-0.460105
-1.17279	-0.479158	-1.19078	-1.20909	-0.566519	-1.00624	-0.853698	-1.18924	-1.25118	-0.554799	-1.34837	-1.32658	-1.15935	-1.1986	-0.72377	-1.78059	-1.10257	-0.931906	-0.651184	0.0235093	-0.621087	-0.499211	-0.779952	-0.813324	-1.2347	-0.450786	-1.32254	-0.361718	-0.102874	-1.04167	-1.44446	-0.754214	-0.567388	-0.228077	-0.663711	-1.05977	-0.609168	-0.5118	NaN	-0.235408	-1.01774	5555	Q8TB61-3;Q8TB61-2;Q8TB61;Q8TB61-5;Q8TB61-4	Q8TB61-3;Q8TB61-2;Q8TB61;Q8TB61-5;Q8TB61-4	Adenosine 3-phospho 5-phosphosulfate transporter 1	SLC35B2	SLC35B2	-1.17279	-0.663711	0.509077
5.13807	4.3027	-0.391132	1.58192	2.69311	1.53254	-0.897108	0.70079	1.81332	0.324466	1.02667	0.919537	2.29679	0.493166	0.889113	2.74507	4.29905	2.51601	1.32723	-0.0228902	2.73973	0.129317	4.43092	2.31907	1.1008	0.172603	3.49183	1.15727	3.29131	2.11962	3.96817	0.368769	1.94319	-0.404776	1.01659	3.9518	-0.096072	0.261806	2.65886	1.54832	4.63572	1174	P00813	P00813	Adenosine deaminase	ADA	ADA	1.02667	2.0314	1.00473
NaN	0.181462	4.47146	2.83719	3.02388	-0.088748	2.51838	2.88475	2.43468	3.07764	3.18196	3.20248	2.55323	4.08313	3.05642	3.07202	2.52804	-0.263723	-0.387235	1.23358	3.04772	3.59883	1.29184	-1.30352	3.26194	2.70181	2.62399	2.0816	0.785807	3.92457	2.39985	3.21761	0.907558	2.40701	2.81849	2.74178	4.0198	2.15888	3.44104	0.493788	0.944637	7663	Q9NZK5;Q9NZK5-2	Q9NZK5;Q9NZK5-2	Adenosine deaminase CECR1	CECR1	CECR1	2.95432	2.46752	-0.486791
-0.659621	-1.15729	-1.67733	-1.07904	-0.965398	-0.522309	-1.13863	-1.3431	-1.41685	-2.2398	-0.462832	-0.498374	-0.0764211	-1.05778	-1.5983	-0.500764	-0.713788	-0.936177	-1.10943	-1.69609	-0.347257	-1.86883	-0.432489	-1.54078	-0.689003	-1.48315	-0.674299	-1.70651	-1.21268	-0.612757	-0.998575	-0.729445	-0.719085	-1.75793	-2.01057	-0.946113	-1.85621	-1.9066	-0.736764	-1.39176	-0.468582	2844	P55263;P55263-2;P55263-3	P55263;P55263-2;P55263-3	Adenosine kinase	ADK	ADK	-1.07904	-0.972344	0.106692
-0.506625	-0.809297	-1.23591	-0.79855	-1.14176	-0.367072	-0.0110991	-0.923893	-1.44781	-1.61715	-0.614938	-0.357598	-0.757042	-0.852327	-1.01254	-0.733321	-0.92516	-0.528733	-1.27323	-1.60945	-1.07034	-1.54794	-0.691468	-0.420668	-0.66312	-1.60628	-0.971478	-1.2216	-1.27447	-0.841802	-1.02816	0.090346	-1.09871	-1.24313	-1.88072	-1.10066	-1.60332	-1.61693	-0.573889	-0.876342	-0.463053	1977	P23526;P23526-2	P23526;P23526-2	Adenosylhomocysteinase	AHCY	AHCY	-0.809297	-1.04925	-0.239952
NaN	0.374047	0.816552	1.44497	0.192445	-1.38273	0.40856	-0.130285	-2.59553	0.488353	1.31209	0.747656	0.999753	1.22467	0.830701	-1.26457	-1.09688	-0.67655	-1.00909	0.348483	0.220902	NaN	NaN	-0.200107	1.03579	0.881015	-0.357384	0.156381	-0.428746	0.497471	NaN	0.648708	-0.539404	NaN	-0.143547	-1.29723	1.52882	-0.104507	NaN	-0.0897372	NaN	2704	P51828	P51828	Adenylate cyclase type 7	ADCY7	ADCY7	0.618005	-0.124027	-0.742032
0.40006	0.259244	1.21615	0.758358	0.0373655	0.00960238	0.86479	-0.164865	-0.0259357	-0.440532	0.708923	0.718525	0.477968	0.952876	0.876385	-0.309177	-0.217496	0.232324	-0.114532	1.02403	0.534446	0.978757	0.404497	1.32323	-0.342845	0.392457	-0.565299	-0.253984	0.0426797	0.920328	-0.0736729	0.773867	0.48549	0.148638	0.075863	0.0204379	1.18103	0.686939	0.0175413	0.236738	0.569433	2812	P54819;P54819-2;P54819-6;P54819-3;P54819-5;P54819-4	P54819;P54819-2;P54819-6;P54819-3;P54819-5;P54819-4	Adenylate kinase 2, mitochondrial;Adenylate kinase 2, mitochondrial, N-terminally processed	AK2	AK2	0.477968	0.234531	-0.243437
-0.806353	-0.362504	0.0321913	0.279457	NaN	-1.46065	0.446392	-0.616425	0.456463	0.983446	-0.0658559	-1.24948	-0.416648	-1.23161	-2.2626	-1.20226	-1.2977	-2.40584	-3.65108	NaN	1.07767	-1.01054	0.584916	-3.95297	-0.311114	-1.47986	-3.49212	0.526957	NaN	0.0797283	-0.493075	NaN	-1.66335	NaN	-1.71119	-1.92217	-0.924528	-0.919812	0.106092	-1.29151	0.853819	2050	P27144	P27144	Adenylate kinase 4, mitochondrial	AK4	AK4	-0.389576	-1.1064	-0.716826
1.64308	-0.886133	-1.64731	-1.94273	-4.78143	1.47859	-0.177387	-2.71594	-3.11238	-2.41591	-3.15796	-0.829158	0.69256	-1.68516	-2.25816	-3.01989	-1.82991	0.699371	1.14796	-2.18928	-2.29872	0.313465	-0.727925	-0.648507	-0.251636	-4.56022	0.562196	0.771842	-1.85384	-2.69526	-2.16708	-1.7904	-0.730128	0.708639	-0.514099	-1.77163	-3.32069	-3.73692	0.379017	0.229218	-1.92561	1167	P00568	P00568	Adenylate kinase isoenzyme 1	AK1	AK1	-1.68516	-1.25088	0.434276
0.13418	-0.595182	-1.06647	-0.219424	-0.618584	0.435637	-0.148611	-0.151562	-0.72118	-1.21755	-0.247534	0.0260074	-0.0744254	-0.329771	-0.574453	0.0928918	-0.171239	-0.00105776	-0.417585	-1.47552	-0.277863	-1.2913	0.0774606	-0.62337	0.14215	-1.46838	-0.336288	-0.998169	-0.671633	-0.344512	-0.128727	-0.374878	-0.707604	-0.784878	-1.25505	-0.534226	-1.44008	-1.51428	-0.0359666	-0.899891	0.0779018	2176	P30566;P30566-2	P30566;P30566-2	Adenylosuccinate lyase	ADSL	ADSL	-0.247534	-0.475905	-0.228372
-0.942351	-0.798761	-1.99807	-0.41507	-0.701963	-0.734554	-0.131345	0.0314422	-0.563729	-1.34236	0.0977723	-0.146867	-0.346181	-0.457626	-1.01401	0.255296	-0.39764	-0.685545	-1.19014	-2.35077	-0.00125331	-2.20232	-0.466449	-0.469606	-0.174143	-1.3027	-0.903601	-1.77565	-0.552646	-0.378017	0.159623	-0.309482	-1.16379	-1.0019	-1.23316	-0.763862	-1.66941	-1.84585	0.541286	-1.58276	-0.679474	2173	P30520	P30520	Adenylosuccinate synthetase isozyme 2	ADSS	ADSS	-0.563729	-0.724703	-0.160974
-2.32484	-2.32898	-1.40241	-1.24171	-2.70872	-1.00309	-2.75491	-1.68609	-2.91817	-1.9441	-1.2555	-0.985349	-1.25723	-1.47671	-2.40708	-2.12891	-2.17104	-1.67495	-1.69974	-2.70547	-2.28744	-2.47105	-2.3645	-2.75512	-0.780355	-2.68317	-2.33704	-1.90786	-3.31061	-2.05746	-2.2098	-1.9517	-3.00046	-1.28671	-2.37397	-2.75721	-2.49067	-2.48317	-1.43394	-2.32152	-2.45891	3232	Q01518	Q01518	Adenylyl cyclase-associated protein 1	CAP1	CAP1	-1.68609	-2.32928	-0.64319
-2.48476	-2.4356	-1.60557	-1.26598	-2.81436	-1.01445	-2.62399	-1.43327	-2.92763	-1.92388	-1.24302	-0.992448	-1.2816	-1.55399	-2.30786	-1.85574	-2.16361	-1.98813	-1.7061	-2.73629	-1.98109	-2.51612	-2.66683	-2.78407	-0.868946	-2.64702	-2.37831	-2.01509	-3.29156	-1.90295	-2.19207	-2.03952	-3.11963	-1.2674	-2.2096	-2.56377	-2.49499	-2.62928	-1.55168	-2.42528	-2.60346	3233	Q01518-2;P40123;P40123-3;P40123-2	Q01518-2	Adenylyl cyclase-associated protein 1	CAP1	CAP1	-1.60557	-2.29395	-0.688381
NaN	-0.235497	NaN	0.41544	NaN	NaN	NaN	NaN	-0.711378	NaN	NaN	0.216989	NaN	-0.425303	0.0652898	NaN	0.730061	0.973123	0.229224	NaN	NaN	NaN	0.361055	0.143918	0.264975	NaN	NaN	NaN	0.431053	0.417618	NaN	0.901414	-0.292343	NaN	NaN	0.0431752	NaN	NaN	NaN	NaN	1.57008	1046	O95396	O95396	Adenylyltransferase and sulfurtransferase MOCS3;Molybdopterin-synthase adenylyltransferase;Molybdopterin-synthase sulfurtransferase	MOCS3	MOCS3	-0.0851038	0.389337	0.474441
1.53893	1.49381	0.553348	0.402186	1.22688	0.216288	0.147778	1.17198	0.803714	1.32653	0.240542	0.242032	0.689723	0.456917	1.05529	1.01488	0.672843	0.628804	0.57148	1.41843	1.73926	1.59305	0.269314	1.10643	0.176612	1.37458	0.233446	0.416101	1.07397	0.416213	0.947043	0.305553	1.01401	2.64094	1.52765	0.827454	1.29532	0.959457	2.53906	1.36803	0.868491	7270	Q9HDC9;Q9HDC9-2	Q9HDC9;Q9HDC9-2	Adipocyte plasma membrane-associated protein	APMAP	APMAP	0.689723	0.986734	0.297011
-0.69679	-0.552403	0.0414578	-0.14296	-0.371126	-0.721801	-0.128318	-0.287929	-0.016764	-0.0254299	-0.333081	-0.292837	-0.409545	-0.29229	-0.425558	-0.756662	-0.384074	-0.896667	-0.305161	0.263655	-0.732554	0.0379816	-0.660617	-0.404161	-0.386002	0.223326	-0.649456	-0.0468432	0.0417538	-0.378017	-0.543224	-0.0264204	-0.0794341	-0.275962	-0.388747	-0.208686	0.0337704	0.0935102	-0.601467	-0.153094	-0.541034	1322	P05141	P05141	ADP/ATP translocase 2;ADP/ATP translocase 2, N-terminally processed	SLC25A5	SLC25A5	-0.292837	-0.341589	-0.0487522
-0.622174	-0.498139	0.0669125	-0.115667	-0.201182	-0.42347	0.00388762	-0.149747	0.0788044	0.204621	-0.307231	-0.281544	-0.431113	-0.126744	-0.429998	-0.463172	-0.267075	-0.82719	-0.259893	0.149855	-0.444765	0.188507	-0.33417	-0.294239	-0.21958	0.030068	-0.347824	0.183383	0.032878	-0.494178	-0.366177	0.126209	-0.0874806	-0.216448	-0.305035	-0.0751643	0.208574	-0.0354117	-0.50543	-0.137514	-0.491829	1611	P12236	P12236	ADP/ATP translocase 3;ADP/ATP translocase 3, N-terminally processed	SLC25A6	SLC25A6	-0.201182	-0.239737	-0.0385541
-0.31882	0.664797	0.781807	0.630112	0.457749	-1.30598	0.149957	0.316388	0.173912	0.594425	0.297271	0.271963	0.343979	0.398772	0.596543	-0.103625	-0.176179	-0.276456	-0.252229	0.3338	0.422984	0.746949	-0.323496	0.0253256	0.0219013	0.708964	-0.598493	0.106207	-0.288478	0.329807	0.0801847	0.426594	0.0426686	0.505649	0.19723	-0.114891	0.944191	0.660095	0.290604	0.411526	-0.125744	6603	Q9BRR6-2;Q9BRR6;Q9BRR6-3;Q9BRR6-4;Q9BRR6-5;Q9BRR6-6	Q9BRR6-2;Q9BRR6;Q9BRR6-3	ADP-dependent glucokinase	ADPGK	ADPGK	0.343979	0.0931956	-0.250784
-0.324879	-0.312136	-0.655114	-0.376281	-0.59553	-0.122698	-0.272625	-0.444025	-0.991839	-0.72762	-0.117996	-0.0922693	-0.285004	-0.374175	-0.938615	-0.0736918	-0.479892	-0.919589	-0.953843	-0.356301	0.0955745	-0.749311	-0.771351	-0.68439	-0.17795	-1.41784	-0.851036	-0.299499	-0.575704	-0.311483	-0.625408	-0.230148	-0.0705532	-0.782565	NaN	-0.92527	-0.837227	-1.04518	NaN	-0.639232	-0.162109	6754	Q9BW91-2;Q9BW91	Q9BW91-2;Q9BW91	ADP-ribose pyrophosphatase, mitochondrial	NUDT9	NUDT9	-0.374175	-0.63232	-0.258145
-1.42068	0.519304	0.907963	0.617045	2.55638	-0.625238	1.80861	0.329045	0.546859	-0.189332	0.326656	0.592422	0.61488	1.04415	0.254392	-0.599863	1.47031	0.322905	0.611265	0.914978	1.56897	0.902004	1.41683	0.398596	0.41414	2.00093	0.750408	1.42514	1.74069	0.783059	0.638053	0.474139	1.38224	0.91684	1.79958	0.394804	1.7349	1.37343	0.696994	-0.219147	0.819745	2096	P28907;P28907-2	P28907	ADP-ribosyl cyclase/cyclic ADP-ribose hydrolase 1	CD38	CD38	0.546859	0.860874	0.314015
-1.36541	-0.660971	2.17094	1.57098	-0.231959	-1.20336	1.10378	2.00168	-0.689666	2.68708	1.44918	0.987394	1.4269	2.36529	2.3649	1.6091	-0.123159	-1.8243	-0.817264	-0.191654	2.59516	1.97235	-0.786244	0.032287	1.87961	0.833694	-0.82411	0.03179	-2.23711	1.39643	1.1674	0.689182	-0.976477	3.65825	1.83374	0.43116	2.35672	1.28447	3.39223	-0.680336	-1.53987	3418	Q10588;Q10588-2	Q10588;Q10588-2	ADP-ribosyl cyclase/cyclic ADP-ribose hydrolase 2	BST1	BST1	1.4269	0.560171	-0.86673
0.0330742	-0.178671	-0.149976	0.560802	-0.228618	0.825166	0.715504	0.543949	-0.361502	-0.159428	0.609621	0.677503	0.559507	0.277177	0.20569	0.497816	-0.0147133	0.355278	0.779709	-0.650868	0.380173	-0.542283	0.459272	-0.236866	0.715893	-0.207413	-0.0888367	-0.435496	-0.496913	0.50356	0.233055	0.854877	-0.488408	-0.166951	-0.699542	-0.201386	-0.24306	-0.402132	0.323442	-0.773173	0.371173	3168	P84077	P84077	ADP-ribosylation factor 1	ARF1	ARF1	0.277177	-0.127894	-0.405071
-0.227619	-0.377576	-0.466926	0.167474	-0.42898	0.567272	0.620081	0.453709	-0.967486	-0.147787	0.348033	0.418221	0.0632145	0.115763	-0.221733	0.125058	-0.46686	-0.242629	0.410201	-0.907883	-0.24951	-0.786331	-0.209923	-0.933562	0.453901	-0.236697	-0.95671	-0.96717	-0.839935	0.303946	-0.311998	0.476011	-1.28509	-0.433891	-1.25134	-0.829278	-0.31203	-0.6792	-0.325201	-0.842692	0.0939184	1814	P18085	P18085	ADP-ribosylation factor 4	ARF4	ARF4	0.0632145	-0.379546	-0.442761
0.706208	0.476695	0.535982	0.750658	0.811083	1.07573	1.18566	1.169	0.284608	0.610483	0.864561	0.793579	0.999503	0.670416	0.912753	1.05861	0.597456	0.607594	1.2942	-0.202908	0.891734	-0.0447905	0.808536	0.240658	0.831776	1.03692	0.336616	-0.297639	0.234304	1.10441	1.17022	1.30446	0.115483	0.732711	-0.0836975	0.567615	0.634104	0.398714	1.22908	-0.356027	0.553394	3169	P84085	P84085	ADP-ribosylation factor 5	ARF5	ARF5	0.793579	0.602525	-0.191054
0.429363	-0.0506651	0.341158	0.626278	0.236097	0.82428	0.737206	0.593527	0.338457	0.40641	0.862563	0.892184	0.613924	0.732327	0.0711352	0.850874	0.777903	0.537249	0.370786	-0.355627	0.412988	-0.201048	0.547631	-0.282624	1.06155	0.247189	0.760291	-0.192093	-0.235251	0.557426	0.795169	0.690526	-0.357161	0.115404	-0.20055	0.153707	0.485222	0.0756524	0.67088	-0.461537	0.273275	3020	P62330	P62330	ADP-ribosylation factor 6	ARF6	ARF6	0.593527	0.32203	-0.271496
-0.360721	0.0477235	0.69821	0.393322	0.282952	0.265817	0.438776	0.316091	-0.494574	0.474095	0.216419	0.22995	0.22062	0.372763	0.181248	0.293059	-0.458107	-0.385471	0.0496743	-0.0873566	-0.354838	-0.346216	-0.0971104	-0.699144	0.551469	0.0109196	-0.425485	NaN	-0.310786	0.487803	0.117804	0.321519	-0.137838	-0.448932	-0.54362	-0.650087	0.362036	0.367958	-0.55738	-0.477289	-0.0944435	5352	Q8N6T3;Q8N6T3-4;Q8N6T3-5;Q8N6T3-2;Q8N6T3-3	Q8N6T3;Q8N6T3-4;Q8N6T3-5;Q8N6T3-2;Q8N6T3-3	ADP-ribosylation factor GTPase-activating protein 1	ARFGAP1	ARFGAP1	0.265817	-0.137838	-0.403655
-0.503791	-0.178127	-0.0101091	0.0417772	-0.416523	0.392922	0.843809	-0.141638	-0.477194	-0.143587	0.268864	0.0925947	-0.0558069	-0.0827419	-0.150262	0.360909	-0.282931	-0.0825472	-0.0957352	-0.797622	-0.361641	-0.824523	0.285365	-0.198164	0.161086	0.0358239	-0.390444	-0.989403	-0.547578	0.374147	-0.0345311	0.688296	-0.768223	-0.635157	-0.380732	-0.762777	-0.0736332	-0.340538	0.232866	-0.29229	0.0230824	5345	Q8N6H7;Q8N6H7-2;Q8N6H7-3	Q8N6H7;Q8N6H7-2	ADP-ribosylation factor GTPase-activating protein 2	ARFGAP2	ARFGAP2	-0.0827419	-0.240548	-0.157806
-0.076743	0.518375	0.676101	0.744985	0.58611	1.05954	0.86262	0.176363	-0.609289	0.54187	1.20139	0.715443	0.668594	0.598924	0.554652	0.477655	0.473969	0.490722	0.577293	0.160505	-0.142814	-0.207734	0.531307	0.755967	0.794098	1.54081	0.330469	-0.64062	0.378002	1.04571	0.0790577	0.992553	0.231242	NaN	-0.538953	0.148974	0.73401	0.798657	-0.404407	-0.495452	0.636811	7276	Q9NP61-2;Q9NP61	Q9NP61-2;Q9NP61	ADP-ribosylation factor GTPase-activating protein 3	ARFGAP3	ARFGAP3	0.598924	0.473969	-0.124955
-0.160806	-0.543083	-0.110874	0.459454	-0.309666	-0.0277157	0.979524	0.198252	-1.35275	-0.368436	0.65853	0.427458	0.0914951	0.244314	NaN	-0.345482	-0.697967	-0.849028	-0.167912	-0.904529	-0.306706	NaN	-0.270713	-0.813648	0.481379	-0.246767	-0.594667	-0.598536	-0.788607	0.298682	-0.458428	0.842683	-0.871189	-0.542763	-0.720144	-1.17999	-0.240055	-0.384474	-0.0316844	NaN	-0.316263	7942	Q9UJY5;Q9UJY5-4;Q9UJY5-3;Q9UJY5-6;Q9UJY5-2	Q9UJY5;Q9UJY5-4;Q9UJY5-3;Q9UJY5-6;Q9UJY5-2	ADP-ribosylation factor-binding protein GGA1	GGA1	GGA1	0.0318897	-0.421451	-0.45334
NaN	-1.99139	0.269997	-0.0255074	-1.5039	-0.674701	0.0454078	-1.07392	-1.34527	-1.14828	NaN	0.113183	-0.664161	0.0919497	-0.260717	-1.1392	-1.10149	-1.02511	-0.95632	-1.01263	-0.589713	NaN	-0.812166	-2.12675	-0.287304	-0.350329	-0.917681	-0.661187	NaN	-0.516223	-1.54066	0.666894	-2.58804	-0.973849	-1.38866	-0.876213	-0.51413	-0.629716	-1.27817	NaN	-2.35443	7941	Q9UJY4	Q9UJY4	ADP-ribosylation factor-binding protein GGA2	GGA2	GGA2	-0.664161	-0.95632	-0.292159
NaN	NaN	NaN	-0.231813	-0.608354	NaN	-0.852403	-0.330503	NaN	NaN	0.434859	0.62729	0.391597	-0.136551	-0.379517	-1.05368	-0.447939	NaN	NaN	NaN	0.124621	-0.194482	-0.00562194	NaN	NaN	0.487186	NaN	0.266985	NaN	-1.26088	0.425457	-2.22095	NaN	-0.258091	-0.411752	NaN	NaN	-0.960427	1.57569	NaN	NaN	7645	Q9NZ52;Q9NZ52-4;Q9NZ52-2	Q9NZ52;Q9NZ52-4;Q9NZ52-2	ADP-ribosylation factor-binding protein GGA3	GGA3	GGA3	-0.231813	-0.226287	0.00552665
-0.516866	-0.478052	-0.634657	-0.19617	-0.952828	0.399286	-0.0451521	-0.394656	-0.739288	-0.45022	-0.217164	-0.179434	-0.326682	-0.328646	-0.112111	-0.507862	-0.719242	-0.216034	-0.203479	-0.325575	-0.711879	-0.341599	-0.40767	-0.656658	-0.233193	-0.419303	-0.499747	-0.580687	-0.477067	-0.134475	-0.641361	-0.454127	-0.85929	-0.46228	-1.49275	-0.862055	-0.677799	-0.613224	-0.543913	-0.637022	-0.104549	2363	P40616;P40616-2	P40616;P40616-2	ADP-ribosylation factor-like protein 1	ARL1	ARL1	-0.328646	-0.503804	-0.175158
NaN	NaN	NaN	NaN	NaN	NaN	1.01414	NaN	NaN	NaN	0.685515	0.704717	0.569013	0.511255	0.671003	0.665469	NaN	NaN	-0.325783	NaN	0.757507	-0.234125	NaN	NaN	0.75893	NaN	NaN	NaN	NaN	NaN	NaN	0.859341	-0.409977	NaN	NaN	NaN	-0.168742	NaN	0.892093	NaN	NaN	5926	Q969Q4	Q969Q4	ADP-ribosylation factor-like protein 11	ARL11	ARL11	0.678259	0.665469	-0.0127898
-0.661511	-0.312916	-0.0200426	-0.25345	0.687215	0.789694	1.05828	-0.522946	0.596641	-0.141674	-0.231492	0.0571874	-0.0970349	-0.141016	0.167095	-0.289069	0.175594	-0.0218871	-0.000142325	-0.079985	0.084167	-0.343804	0.980487	1.11541	-0.137932	0.260009	-0.370285	0.00826375	0.479501	0.237152	-0.0564286	0.585228	0.101144	0.0293849	-0.255691	-0.087709	0.309988	0.0275104	0.0943671	-0.385199	-0.243123	2303	P36404;P36404-2	P36404;P36404-2	ADP-ribosylation factor-like protein 2	ARL2	ARL2	-0.0970349	0.0178871	0.114922
-0.260176	-0.625098	-1.69353	-0.4407	-2.76679	0.740602	0.438185	NaN	NaN	-1.77754	0.2488	0.266173	-0.358061	-0.436469	-0.562304	-1.36182	-2.48339	-0.569587	-0.387989	-1.38419	-0.383808	-1.70906	-0.206474	-0.0624171	0.260736	NaN	-0.606206	-0.445815	-0.801161	-0.0481766	-1.12196	0.0136451	-1.08292	-0.199768	-0.791292	-1.2065	-1.91877	-1.45859	-0.494924	NaN	-0.511988	2304	P36405	P36405	ADP-ribosylation factor-like protein 3	ARL3	ARL3	-0.436469	-0.587896	-0.151427
0.00533305	0.0728385	0.324367	-0.0582945	-0.0988198	-0.0796023	0.503902	0.284143	0.224338	0.192623	-0.234044	-0.128596	-0.165666	-0.10695	0.0261837	0.131594	-0.0711317	-0.32334	0.0725451	0.292323	-0.121184	0.438409	-0.0457431	0.211429	0.0256641	0.423953	-0.0359489	0.129384	-0.00484513	-0.360051	-0.0847221	0.16086	-0.100308	0.178343	-0.207552	-0.213107	0.443174	0.0996975	-0.387839	0.197059	-0.2643	3857	Q15041;Q15041-2;Q15041-3	Q15041;Q15041-2;Q15041-3	ADP-ribosylation factor-like protein 6-interacting protein 1	ARL6IP1	ARL6IP1	0.00533305	0.0104095	0.00507643
NaN	0.715261	NaN	NaN	0.946602	-0.401451	-0.0267357	0.502219	NaN	0.0684615	NaN	-0.273558	NaN	NaN	NaN	0.636138	NaN	0.68346	0.487543	0.988191	0.623414	0.35088	0.60454	0.715633	0.93724	NaN	1.16408	0.344955	1.10797	NaN	0.400438	NaN	0.700241	-0.150275	0.837198	1.13121	NaN	0.966603	-0.290755	0.79892	0.120902	4462	Q66PJ3;Q66PJ3-7;Q66PJ3-4;Q66PJ3-3;Q66PJ3-2;Q66PJ3-5	Q66PJ3;Q66PJ3-7;Q66PJ3-4;Q66PJ3-3;Q66PJ3-2	ADP-ribosylation factor-like protein 6-interacting protein 4	ARL6IP4	ARL6IP4	0.0684615	0.68346	0.614998
2.07358	1.34926	1.56584	1.61627	2.31525	0.634248	1.13046	1.71679	1.94758	2.03293	1.73079	0.28818	1.51025	1.71326	1.90083	1.72151	1.48225	1.2542	0.772642	1.36641	NaN	1.54317	NaN	NaN	1.25773	1.87957	1.01002	1.23029	0.666406	1.56239	1.93267	0.465627	1.62173	1.98581	1.50318	1.69406	2.34556	2.32597	1.86579	0.710653	1.32871	5999	Q96BM9	Q96BM9	ADP-ribosylation factor-like protein 8A	ARL8A	ARL8A	1.71326	1.50318	-0.210082
0.648274	0.51346	0.980275	0.593536	-0.0651925	-0.82392	0.306161	0.349409	-0.0511762	0.707002	0.272123	0.477654	0.36579	0.818644	0.871119	-0.194528	-0.39376	-0.0546429	0.116603	0.67533	0.513174	1.05773	-0.545737	0.203425	0.202648	0.417321	-0.623246	0.0608476	-0.761095	0.188263	-0.177324	0.347272	0.330653	1.3071	0.0098999	-0.323819	1.0848	0.479504	0.671764	0.923235	0.145341	7509	Q9NVJ2;Q9NVJ2-2	Q9NVJ2	ADP-ribosylation factor-like protein 8B	ARL8B	ARL8B	0.477654	0.195455	-0.282199
-0.486034	0.230257	-0.00105065	-0.200826	0.901957	0.975381	0.441098	0.0348221	NaN	0.354114	NaN	-0.0561834	-0.180415	-0.099231	0.172472	-0.432941	-0.162692	-0.233148	0.426302	0.492199	0.0699161	0.0464308	0.158984	0.402862	0.0640931	NaN	-0.037817	-0.0527269	0.908507	0.316816	-0.0601502	0.488803	-0.0590415	0.201605	0.0393161	0.464626	0.59285	0.0201292	-0.169335	0.363025	0.00248202	3647	Q13795;Q13795-4;Q13795-3;Q13795-2	Q13795;Q13795-4;Q13795-3;Q13795-2	ADP-ribosylation factor-related protein 1	ARFRP1	ARFRP1	0.0348221	0.0640931	0.029271
-0.688095	-0.56546	-1.5245	-0.577679	-0.954564	-0.215964	0.61311	0.730928	0.260678	-0.651082	-0.263654	0.0153559	-0.129763	-0.795291	-0.892613	1.16139	0.240022	-0.163744	-0.606611	-1.38716	-0.481393	-1.98766	-0.0750956	-0.383849	0.17469	-1.3378	0.498632	-0.956013	-1.02326	-0.145106	0.698368	-0.291858	-0.703122	-1.51754	-1.13433	0.479346	-1.55748	-1.43361	-0.366041	-1.4051	-0.340063	7969	Q9UKK9	Q9UKK9	ADP-sugar pyrophosphatase	NUDT5	NUDT5	-0.56546	-0.432621	0.132839
-0.0771636	-0.106626	0.902264	NaN	NaN	NaN	NaN	NaN	NaN	NaN	0.422956	NaN	-0.320951	0.0397117	NaN	NaN	-0.299746	NaN	NaN	0.0536572	-0.0266247	NaN	0.0715395	NaN	-0.8752	2.84581	NaN	NaN	NaN	0.460153	-0.354509	-2.80109	2.15205	NaN	NaN	NaN	-0.365693	0.414947	NaN	NaN	-1.23611	1537	P10109	P10109	Adrenodoxin, mitochondrial	FDX1	FDX1	-0.018726	-0.0266247	-0.00789879
NaN	-0.469683	0.0230356	NaN	NaN	-0.0894638	NaN	NaN	0.820308	-0.661117	-0.460556	NaN	NaN	NaN	NaN	-0.0515433	NaN	NaN	0.275935	0.975955	NaN	NaN	-0.00341332	-0.0399182	NaN	NaN	-0.733734	NaN	-0.137142	-0.186034	0.349093	NaN	NaN	NaN	-0.0126846	0.653536	0.642116	-0.199695	NaN	NaN	0.112478	4592	Q6P4F2;Q6P4F2-2	Q6P4F2	Adrenodoxin-like protein, mitochondrial	FDX1L	FDX1L	-0.27501	-0.00804894	0.266961
-0.56361	NaN	NaN	-1.59352	NaN	2.00542	-1.76635	NaN	NaN	-2.06877	-2.3835	NaN	-1.40933	-0.597764	-1.70232	NaN	NaN	NaN	NaN	NaN	NaN	NaN	-2.13579	1.68813	NaN	NaN	NaN	NaN	NaN	NaN	-2.64474	-1.12724	NaN	NaN	NaN	NaN	NaN	-0.749988	-0.136217	-0.554385	NaN	2833	P55196;P55196-5;P55196-3;P55196-1;P55196-2;P55196-6	P55196;P55196-5;P55196-3;P55196-1;P55196-2;P55196-6	Afadin	MLLT4	MLLT4	-1.59352	-0.749988	0.843532
0.017117	-0.128057	-0.244423	-0.344625	0.142439	-0.278404	-0.694512	-0.156666	0.610076	0.0919637	-0.491308	-0.306958	-0.276415	-0.283924	0.0227879	-0.0654734	0.11071	-0.309803	0.148288	0.941407	0.0841997	0.486455	0.385459	0.052192	-0.739983	0.144312	-0.600728	0.208164	0.585705	-0.30162	0.104184	-0.184087	0.645359	0.143496	0.151035	0.374006	0.104661	0.340777	-0.0378758	0.229218	0.139218	8335	Q9Y4W6	Q9Y4W6	AFG3-like protein 2	AFG3L2	AFG3L2	-0.244423	0.141357	0.38578
0.489657	0.0713621	0.325278	0.458761	0.176606	0.79573	1.135	0.414815	-0.155968	-0.662073	0.824891	0.905493	0.937332	0.702466	-0.0808344	0.65449	0.106384	1.29228	1.26879	-0.370782	0.469732	-0.464116	0.945273	1.51589	0.522724	-0.0707365	0.0125919	-0.506606	0.142815	1.06053	0.420524	0.996071	0.170745	-0.693977	-0.421439	0.0422688	0.278741	-0.481361	0.493404	-0.617421	0.59137	563	O43488;Q8NHP1;O95154	O43488	Aflatoxin B1 aldehyde reductase member 2	AKR7A2	AKR7A2	0.458761	0.224743	-0.234018
0.0401308	NaN	0.705403	0.681493	-0.539225	0.430364	0.177795	0.49512	-0.188737	0.225858	0.625879	0.400813	0.536201	NaN	0.571781	0.693529	-0.119459	0.191445	-0.0193167	-0.0169356	-0.291126	0.417244	0.434396	-0.058182	0.719997	0.99918	0.225464	-0.331743	-0.662383	0.852394	0.149364	0.363698	0.313863	-0.405601	NaN	-0.288357	0.552098	0.31908	-0.801329	-0.166808	0.464695	4656	Q6ULP2-5;Q6ULP2-2;Q6ULP2-4;Q6ULP2;Q6ULP2-3	Q6ULP2-5;Q6ULP2-2;Q6ULP2-4;Q6ULP2;Q6ULP2-3	Aftiphilin	AFTPH	AFTPH	0.430364	0.191445	-0.238919
-0.376033	-0.418664	-1.15258	-0.0658966	-0.280116	-0.125585	0.361934	0.101851	-0.372462	-0.472293	0.0444886	0.120651	-0.0511421	-0.151959	-0.262839	0.326308	0.00883497	-0.248168	-0.502392	-1.09243	-0.470317	-1.28577	-0.2896	-0.294841	0.123986	-0.340104	-0.0347207	-0.945408	-0.64693	0.0794659	-0.157363	0.0495429	-1.09749	-1.33125	-1.00311	-0.424941	-0.618682	-0.397043	-0.552008	-0.997463	-0.277284	243	O00170	O00170	AH receptor-interacting protein	AIP	AIP	-0.151959	-0.410992	-0.259033
2.23466	-1.90092	-2.15412	-1.85062	-2.67437	-1.58512	-1.89143	-2.09885	-1.30185	-1.13695	-1.88275	-1.85788	-2.27089	-1.46999	-1.02846	-1.75152	-2.3527	-1.59369	-2.08871	-0.889342	-2.52359	-0.902422	-1.66734	-1.05758	-1.78318	-1.48785	-1.32592	-1.24613	-1.61483	-1.623	-1.53798	-1.53828	-1.10869	0.780749	-0.919282	-1.99889	-1.30031	-1.34701	-1.68281	-0.711831	-1.87989	5830	Q92667;Q92667-2	Q92667;Q92667-2	A-kinase anchor protein 1, mitochondrial	AKAP1	AKAP1	-1.85788	-1.53813	0.31975
NaN	0.641901	NaN	NaN	NaN	NaN	NaN	0.868032	1.0231	0.891382	-0.223671	0.39917	NaN	NaN	NaN	0.707979	0.338593	1.1758	0.392001	1.7699	0.480132	-2.21969	NaN	1.11807	0.943121	1.1528	1.07881	0.549818	NaN	0.746512	NaN	NaN	NaN	NaN	NaN	0.0475249	0.977223	0.688608	NaN	NaN	0.756907	7954	Q9UKA4	Q9UKA4	A-kinase anchor protein 11	AKAP11	AKAP11	0.754966	0.746512	-0.00845465
NaN	1.75301	3.11805	2.42013	NaN	NaN	1.97313	2.46499	1.61235	3.23345	2.52135	1.89602	2.4868	2.33628	3.17535	1.78069	2.44068	NaN	NaN	1.75465	2.41963	2.56032	1.88804	0.870869	2.32316	2.46312	2.8338	1.38513	0.0199372	2.1112	2.62418	2.02365	-1.0844	NaN	1.56691	1.64132	3.3221	2.63138	0.81582	NaN	0.494985	3434	Q12802-4;Q12802;Q12802-2;Q12802-5	Q12802-4;Q12802;Q12802-2	A-kinase anchor protein 13	AKAP13	AKAP13	2.44256	1.95584	-0.486717
-0.0396953	0.805636	-0.124073	-0.188821	0.420993	-0.0826678	-0.095357	0.113539	0.635456	0.713935	-0.132936	-0.390456	-0.247729	-0.0695487	-0.0529466	0.0110617	0.11553	-0.0800217	-0.325783	0.587179	0.178619	0.787793	-0.11313	0.429208	-0.549556	0.663629	-0.0267533	0.456652	0.730687	-0.0369156	0.198605	-0.868198	0.453699	0.299428	0.569739	0.811722	0.43777	0.542535	NaN	0.644531	-0.101807	3248	Q02040;Q02040-2;Q02040-3	Q02040	A-kinase anchor protein 17A	AKAP17A	AKAP17A	-0.0695487	0.299428	0.368976
-0.499372	-0.348474	-0.347144	-0.628386	-0.347991	-1.2193	-0.922713	-0.723328	-0.191373	-0.561835	-0.427005	-0.776627	-0.766471	-1.09864	-0.634567	-0.446747	-0.246092	-0.578943	-0.366133	-0.0569535	-0.613098	-0.0721942	-0.683015	-1.11818	-0.778966	-0.412105	-0.61194	0.101177	0.26349	-0.959333	-0.492643	-1.06054	-0.0556588	-0.56325	-0.0982011	-0.456018	-0.568075	-0.30956	-0.527799	-0.0143554	-0.502422	624	O43823	O43823	A-kinase anchor protein 8	AKAP8	AKAP8	-0.628386	-0.474331	0.154056
0.105004	0.177444	-0.270292	-0.217195	0.0147513	-0.537466	-0.63608	-0.430567	0.122021	0.143231	-0.443363	-0.496638	-0.362507	-0.54984	-0.300111	-0.232684	0.130904	0.109447	-0.171482	0.547419	-0.200366	0.255858	0.036241	0.178065	-1.0332	-0.165975	0.266519	0.210443	0.206023	-0.403678	-0.503422	-0.371818	0.417565	-0.273691	0.733661	0.0786008	-0.00651763	0.187643	-0.44514	0.213958	0.010071	8037	Q9ULX6;Q9ULX6-2	Q9ULX6;Q9ULX6-2	A-kinase anchor protein 8-like	AKAP8L	AKAP8L	-0.300111	0.0574209	0.357532
0.176418	0.230558	-0.148465	-1.82325	-0.0877016	-1.16229	0.0393463	0.82	0.0784472	0.203111	-0.830111	-0.108666	-0.815773	-0.0858502	0.709267	0.803171	-0.246353	0.951717	-0.0978858	0.141054	0.316318	0.732338	0.417624	0.152546	0.318292	1.59144	-1.05399	0.445122	0.108488	-0.342905	-0.371442	0.19889	-0.42662	0.0937343	0.52513	0.501002	-0.480024	-0.365287	0.27838	0.845764	-0.0675357	6541	Q99996-5;Q99996-3;Q99996-2;Q99996;Q99996-6;Q99996-4;REV__P35241-4;REV__P35241;REV__P35241-5;REV__Q00839-2;REV__Q00839	Q99996-5;Q99996-3;Q99996-2;Q99996;Q99996-6	A-kinase anchor protein 9	AKAP9	AKAP9	-0.0858502	0.175718	0.261568
-0.782175	-0.412122	-0.964159	-0.945731	-0.42706	-0.923002	-0.988372	-0.942909	-0.0838655	-0.245691	-0.987444	-1.2303	-1.2921	-0.978728	-0.844315	-0.905799	-0.599199	-0.407209	-1.36378	-0.036206	-0.831701	-0.316365	-0.850544	-0.432425	-1.38514	-0.311768	-0.338086	0.0714677	-0.341204	-1.12079	-0.533253	-1.28924	-0.249678	-0.484953	-0.15555	-0.234594	-0.48777	-0.275991	-0.775859	-0.0075804	-0.763735	7394	Q9NRG9;Q9NRG9-2	Q9NRG9;Q9NRG9-2	Aladin	AAAS	AAAS	-0.942909	-0.458689	0.48422
-3.23563	-1.93892	NaN	NaN	NaN	-1.99691	-3.74091	NaN	-4.5277	NaN	NaN	NaN	NaN	-2.68692	NaN	NaN	NaN	-1.96284	-1.83982	-0.957584	NaN	-2.18025	NaN	-3.61457	-2.34974	-2.78294	-2.84554	NaN	-2.63401	NaN	NaN	NaN	-1.37642	NaN	NaN	NaN	-2.83459	NaN	-2.34758	NaN	NaN	5599	Q8TD30-2;Q8TD30;P24298	Q8TD30-2;Q8TD30	Alanine aminotransferase 2	GPT2	GPT2	-2.96128	-2.34866	0.612612
-1.54507	-2.29447	-2.74302	-1.89606	-2.60626	-0.309734	-2.04184	-2.08215	-2.25379	-2.49187	-1.45886	-0.929696	-1.44796	-2.01717	-2.6875	-1.63624	-1.99709	-1.32051	-1.62663	-2.48164	-2.14436	-2.05117	-1.61981	-2.14161	-1.3002	-2.80169	-1.4753	-1.83648	-1.81355	-1.42381	-2.24977	-2.23519	-2.20603	-2.02338	-2.65313	-2.45723	-3.02363	-3.24744	-1.6628	-1.99316	-1.71166	2570	P49588;P49588-2	P49588;P49588-2	Alanine--tRNA ligase, cytoplasmic	AARS	AARS	-2.04184	-2.01023	0.0316045
-0.719216	-0.624344	-1.1761	-1.19194	-0.770358	-0.801665	-1.93663	-2.19018	-0.299038	-0.989714	-1.68466	-0.935811	-1.16765	-2.24249	-0.845763	-1.43926	-0.591116	-0.555196	-0.840367	-0.185227	-0.61289	-0.344585	-0.171247	-0.285416	-1.24419	-0.946848	-0.663223	0.210307	0.103864	-1.07965	-0.672965	-1.71637	0.0519244	-0.587983	-0.192071	-0.480757	-0.725264	-0.61739	-0.601967	-0.116739	-0.55315	4291	Q5JTZ9	Q5JTZ9	Alanine--tRNA ligase, mitochondrial	AARS2	AARS2	-0.989714	-0.589549	0.400164
-0.942429	-1.40655	NaN	-1.13475	-1.14588	-0.368513	-0.890479	-1.10238	-1.2925	-1.91325	-1.16196	-0.763564	-1.08375	-1.12995	-1.26943	-0.499726	-0.994301	-1.77029	-1.0001	-1.61745	-1.25427	NaN	-1.37464	-1.30641	-1.3058	-2.1558	-0.985386	NaN	-0.571542	-1.10399	-0.490335	-0.374073	-1.28498	NaN	-1.94381	-0.838502	-2.30402	-2.01566	-1.03743	-0.854084	-0.699425	6662	Q9BTE6;Q9BTE6-2;Q9BTE6-3	Q9BTE6;Q9BTE6-2;Q9BTE6-3	Alanyl-tRNA editing protein Aarsd1	AARSD1	AARSD1	-1.13235	-1.10399	0.0283605
1.2232	1.32277	0.0122697	1.31116	0.669729	2.10216	0.928706	1.35909	0.878203	-0.28713	1.34722	1.01577	1.39083	0.640028	0.863736	1.00671	1.83986	2.63847	0.829385	-0.467254	1.25622	-0.8961	1.01336	2.16018	1.12737	-0.369255	1.62265	-0.777703	0.278707	1.37134	1.57059	1.29156	0.599949	-0.783103	-0.435781	1.35677	0.0640585	-0.29219	0.489104	-0.519462	1.98323	1686	P14550	P14550	Alcohol dehydrogenase [NADP(+)]	AKR1A1	AKR1A1	1.01577	0.918047	-0.0977239
1.01982	0.862881	-0.787023	0.110542	0.145596	0.861696	0.43539	-0.105767	-0.407063	-1.17542	0.118568	0.466607	0.554706	-0.113448	0.0254007	0.733807	0.562009	1.00263	0.606434	-1.03569	0.535586	-1.43779	0.838235	0.0958607	0.585551	-1.24476	0.554678	-0.721262	-0.229106	0.404269	0.374118	-0.104265	0.107715	-0.871642	-0.6717	-0.0413975	-1.2672	-1.32187	0.80576	-0.584747	0.95012	1600	P11766	P11766	Alcohol dehydrogenase class-3	ADH5	ADH5	0.118568	0.101788	-0.0167797
0.255798	0.196657	0.499263	0.637577	0.10593	0.5836	1.03795	0.490718	-0.395658	0.0520166	0.626223	0.823861	0.737561	0.407251	0.39857	0.768092	-0.136599	0.549545	0.547457	-0.869745	0.367261	-0.881958	0.0459979	-0.0885735	0.620848	0.176612	-0.122016	-0.686501	-0.313118	0.635425	0.153663	0.575618	-0.748439	0.0273425	-0.535546	-0.289034	-0.241754	-0.122668	0.746758	-0.647714	-0.00718501	5208	Q8IZ83;Q8IZ83-3;Q8IZ83-2	Q8IZ83;Q8IZ83-3	Aldehyde dehydrogenase family 16 member A1	ALDH16A1	ALDH16A1	0.490718	-0.0478792	-0.538597
NaN	0.326148	3.08364	2.4137	0.83216	NaN	1.66973	1.31842	1.171	2.06478	1.56682	1.99565	2.10779	2.48624	2.02128	1.2695	-0.457319	-0.61277	0.594599	1.61672	2.38548	2.6907	-0.153698	3.12477	1.79302	2.63023	NaN	NaN	-0.573263	1.44829	1.59655	2.02638	1.73038	2.53071	-0.0976826	1.61915	2.7304	1.77964	-0.311495	NaN	1.10593	2450	P43353;P43353-2;P48448	P43353;P43353-2	Aldehyde dehydrogenase family 3 member B1	ALDH3B1	ALDH3B1	1.99565	1.61672	-0.378935
-0.121208	0.0826397	-0.561199	-0.445369	0.741666	0.125556	-2.50793	-2.5918	0.497264	-1.39168	-1.10858	-1.1483	-0.320559	-0.31848	0.170286	-0.932776	-0.792253	-2.99127	0.391035	1.48108	-0.251772	0.0977116	0.897353	-1.16518	-1.32728	0.0676208	-1.14745	-0.772846	-0.490847	-0.709504	0.0271337	0.0775355	0.966899	-0.391567	0.800295	0.538055	-0.803048	-0.141987	0.650684	0.326248	0.804447	2184	P30837	P30837	Aldehyde dehydrogenase X, mitochondrial	ALDH1B1	ALDH1B1	-0.320559	-0.0574268	0.263132
0.348321	0.60425	0.371006	-1.54711	-2.00223	-2.67752	-1.27195	-0.789672	-1.43482	-0.634336	-2.97051	-3.36654	-1.905	-3.26428	-1.39679	-0.720683	-0.430488	0.315076	-0.38829	0.197948	-0.0950973	0.257937	-0.0305005	-2.41496	1.22765	-2.45802	-2.45536	-0.518984	-0.514468	-0.622601	-1.18956	-1.20032	-1.19913	1.71649	1.08826	-0.486701	-1.36085	-3.09433	0.900982	1.34241	-4.98228	1315	P05091;P05091-2;O94788-4;O94788-2;O94788-3;O94788	P05091;P05091-2	Aldehyde dehydrogenase, mitochondrial	ALDH2	ALDH2	-1.43482	-0.500584	0.934234
4.53526	2.1241	NaN	NaN	3.14499	3.15734	2.44197	NaN	2.67748	NaN	NaN	1.09748	1.87244	1.47156	2.91854	3.81565	4.0808	3.55669	2.95831	NaN	2.66118	2.90912	3.48584	0.126093	NaN	NaN	2.73634	1.91505	3.85996	NaN	3.50774	1.25056	2.69929	NaN	2.35131	2.46622	NaN	0.341619	3.29997	NaN	2.91344	2407	P42330;P42330-2;P17516	P42330;P42330-2	Aldo-keto reductase family 1 member C3	AKR1C3	AKR1C3	2.55973	2.90912	0.349396
0.634963	1.20241	-0.165134	0.67954	-1.30086	0.405276	0.307899	-0.309353	NaN	NaN	0.405374	0.767747	-0.446391	0.397805	0.244462	-0.397315	-0.0660678	0.592502	NaN	NaN	NaN	NaN	NaN	-0.0685152	0.492947	NaN	-0.910175	NaN	NaN	0.141799	-0.983644	2.4739	NaN	-0.657249	NaN	-0.867495	NaN	-1.80647	-0.0545113	NaN	NaN	6023	Q96C23	Q96C23	Aldose 1-epimerase	GALM	GALM	0.397805	-0.0685152	-0.46632
0.205851	0.229921	-0.668497	0.0844231	0.294897	1.10131	1.48277	-0.989663	-0.901653	-1.96459	0.531152	0.956773	0.413279	0.131841	-0.298456	0.447418	0.0488861	0.150268	0.175398	-1.13135	-0.164696	-1.62127	0.913499	0.103976	1.31211	-1.51012	0.250363	-1.62283	-1.60598	-0.0501247	-0.150705	0.971641	0.0829987	-1.73899	-0.370697	-0.367866	-1.00759	-1.3591	0.214413	-0.942818	-0.189888	1706	P15121	P15121	Aldose reductase	AKR1B1	AKR1B1	0.205851	-0.1577	-0.363551
-1.16944	-0.729197	-0.667826	-0.448584	-0.809441	-1.32243	-0.901609	-0.610188	-0.343582	-0.318629	-0.530515	-1.28885	-0.836111	-0.57705	-0.695391	-1.40478	-1.15084	-1.00627	-0.606081	-0.254336	-1.00083	-0.331652	-0.936158	-0.595255	-0.918483	-0.16401	-1.33529	-0.683757	-0.593285	-1.14479	-0.692606	-0.383223	-0.760229	0.57662	-0.286854	-0.612816	-0.366173	-0.383187	-0.39534	-0.430406	-0.860851	233	O00116	O00116	Alkyldihydroxyacetonephosphate synthase, peroxisomal	AGPS	AGPS	-0.695391	-0.609449	0.0859425
0.227294	0.154159	1.86183	2.83153	1.60541	0.553283	0.683232	2.58793	-0.0568511	1.41861	2.56881	2.28474	2.47638	1.85994	2.17171	2.3956	0.592723	0.687631	0.633003	-0.55222	2.5827	-0.0518297	0.57641	1.01733	2.3685	1.63617	0.0189133	NaN	-0.806299	2.54216	1.83512	2.49593	-1.09558	0.765091	-0.0107852	1.42511	1.56087	1.46198	1.43263	NaN	0.741808	2817	P55008;P55008-2;P55008-3	P55008	Allograft inflammatory factor 1	AIF1	AIF1	1.85994	0.891208	-0.968728
-0.893743	0.0557696	1.08015	0.0881258	-0.33242	-0.487289	0.615447	-0.516478	-0.0472798	0.00873842	-0.379151	0.135336	-0.279642	0.94254	0.123965	-0.187176	-0.291426	-0.753093	-0.579372	0.811733	-0.900824	1.00478	-0.174469	-0.0519918	0.0798554	0.696922	-0.485773	-0.175221	-0.377999	0.11335	-0.35716	1.82904	0.0580714	-0.0458658	-0.791292	-0.112655	0.993198	0.292343	-0.82327	0.22684	-0.71891	4542	Q6NUM9;Q6NUM9-2	Q6NUM9;Q6NUM9-2	All-trans-retinol 13,14-reductase	RETSAT	RETSAT	0.00873842	-0.143562	-0.1523
-0.581463	-1.24681	NaN	-0.196304	NaN	-0.190347	-0.757347	-0.819671	NaN	-1.44146	-0.102493	-0.260466	0.0280751	-0.794213	-1.18608	-0.812018	NaN	NaN	-0.771286	NaN	-0.865222	NaN	-1.03949	-0.855402	0.00755602	-0.38402	NaN	NaN	-0.96307	-0.256931	-1.4888	-0.744869	NaN	NaN	NaN	NaN	NaN	-1.17552	NaN	NaN	-0.497736	4615	Q6PD74;Q6PD74-2	Q6PD74;Q6PD74-2	Alpha- and gamma-adaptin-binding protein p34	AAGAB	AAGAB	-0.669405	-0.812018	-0.142614
0.126742	0.011693	-0.207699	0.186495	1.19719	0.196314	0.695752	0.340595	1.20943	0.404603	NaN	NaN	0.243588	NaN	0.139959	NaN	0.155137	0.882154	1.18596	NaN	NaN	0.381299	NaN	NaN	0.140398	0.557607	NaN	NaN	0.716471	0.708732	0.267096	NaN	NaN	0.190678	0.332543	0.728399	0.848472	NaN	0.140614	0.141985	0.523298	6818	Q9BYC5;Q9BYC5-2;Q9BYC5-3;Q9BYC5-4	Q9BYC5;Q9BYC5-2;Q9BYC5-3	Alpha-(1,6)-fucosyltransferase	FUT8	FUT8	0.219951	0.452298	0.232347
-0.638763	-0.18074	0.436565	0.497602	-0.989166	0.575972	0.342439	-0.294597	-0.51202	-0.0497622	0.218904	0.0864197	0.45954	0.643679	-0.172312	-1.01894	-0.913074	-0.444184	0.724834	0.364151	-0.355706	0.575253	-0.559637	1.4693	0.407765	0.22143	-0.993553	0.347312	0.00615575	0.475813	-1.18714	0.873323	0.917471	0.359043	0.661272	-0.226854	1.05281	0.371362	-1.34646	0.193923	1.13341	5507	Q8NFV4-4;Q8NFV4;Q8NFV4-6;Q8NFV4-5;Q8NFV4-3;Q8NFV4-2	Q8NFV4-4;Q8NFV4;Q8NFV4-6	Alpha/beta hydrolase domain-containing protein 11	ABHD11	ABHD11	0.0864197	0.353178	0.266758
1.34784	0.589773	-0.0912765	0.329194	0.119981	1.13516	-0.28372	-0.406572	0.137601	-0.914706	1.08602	1.08942	1.19123	0.918324	0.54934	1.03841	1.00614	1.78256	0.936373	-0.822489	-0.143673	-0.626629	0.429961	1.37075	0.997813	-1.77161	1.51893	-0.938833	-0.4153	-0.0490193	-0.533676	0.324893	-0.0714216	-1.23476	-0.42285	0.105786	-0.683504	-0.951476	0.822015	-1.02142	1.48457	6217	Q96IU4;Q96IU4-2	Q96IU4	Alpha/beta hydrolase domain-containing protein 14B	ABHD14B	ABHD14B	0.54934	-0.0602204	-0.609561
NaN	0.0313781	0.294437	NaN	1.31292	-0.576288	-1.18654	-0.911752	0.603266	NaN	-0.201725	0.594769	0.0661165	-0.169134	0.666618	NaN	0.699084	0.154559	-0.766836	0.994768	0.170941	0.792636	0.568705	-0.526497	-0.424346	0.488858	1.36849	1.47564	0.55755	-0.314014	0.443504	-0.374234	1.31229	1.26666	1.34877	0.658267	0.524092	0.514652	0.332545	1.26544	0.52766	4399	Q5VST6;Q5VST6-2	Q5VST6;Q5VST6-2	Alpha/beta hydrolase domain-containing protein 17B	ABHD17B	ABHD17B	0.0487473	0.52766	0.478913
NaN	0.77544	NaN	0.141582	0.54101	0.164886	NaN	NaN	0.911539	NaN	NaN	0.164267	NaN	NaN	0.731219	0.258437	0.27931	0.584992	0.388679	0.681638	-0.405287	NaN	NaN	0.454231	-0.0644819	0.378237	NaN	NaN	NaN	0.26207	NaN	NaN	0.568772	NaN	0.580394	0.911499	0.658935	NaN	NaN	NaN	0.405512	7100	Q9H6U8-2;Q9H6U8-4;Q9H6U8;Q9H6U8-3	Q9H6U8-2;Q9H6U8-4;Q9H6U8;Q9H6U8-3	Alpha-1,2-mannosyltransferase ALG9	ALG9	ALG9	0.54101	0.405512	-0.135498
0.0326252	0.464596	0.00418267	0.264374	0.602758	0.25327	0.0315113	0.425499	1.16477	0.539781	0.0760276	0.0598822	0.248352	NaN	0.495004	0.339462	0.751759	0.188571	-0.876416	0.621981	0.220201	0.793803	NaN	0.0964597	0.0703345	0.189656	0.215936	0.246757	0.579439	0.124015	0.417623	0.470037	0.311806	0.552585	0.594536	0.634048	0.694133	0.593627	-0.100649	0.573794	0.0276444	7071	Q9H553;Q9H553-2	Q9H553;Q9H553-2	Alpha-1,3/1,6-mannosyltransferase ALG2	ALG2	ALG2	0.258822	0.339462	0.0806395
-0.644602	NaN	1.1303	0.0180768	1.16729	0.255802	0.981988	1.19354	0.945729	1.42032	1.03515	0.532096	-0.0103127	1.3835	0.516381	0.411049	0.855902	-0.850391	0.336865	0.640318	NaN	1.04884	-0.557369	0.778745	1.07408	0.486022	-0.296358	-0.0832715	NaN	1.01221	-0.423374	1.1523	0.308128	0.811955	0.0417468	0.833426	1.40954	0.505935	-0.0693815	-0.462156	-0.295525	2039	P26572	P26572	Alpha-1,3-mannosyl-glycoprotein 2-beta-N-acetylglucosaminyltransferase	MGAT1	MGAT1	0.963859	0.448535	-0.515323
-0.665096	-0.0247069	-0.444715	-0.488301	-0.888889	0.147732	-0.0857855	-0.220518	-0.527397	0.165587	-0.524873	-0.69687	-0.731235	-0.0788357	-0.537475	-0.624341	-0.965731	-0.818077	-0.448272	0.0772471	-0.35459	0.00738278	-0.837161	-0.808049	-0.560603	0.209361	-1.02637	-0.646181	-0.207602	-0.208577	-0.144038	-0.021956	-0.502377	-0.345871	-0.632502	-0.576943	0.0887148	-0.383772	-0.827654	0.021929	-0.756338	3410	Q10469	Q10469	Alpha-1,6-mannosyl-glycoprotein 2-beta-N-acetylglucosaminyltransferase	MGAT2	MGAT2	-0.488301	-0.475324	0.0129767
2.89097	1.48059	1.50736	1.87162	2.51632	1.8677	0.00274627	3.01671	3.11164	2.41642	0.903127	0.469716	1.15641	1.03857	2.70615	1.89052	1.44138	NaN	-0.119261	1.26855	2.69381	3.1734	1.07251	-4.54397	1.05237	5.10194	1.48713	2.02692	0.46775	2.51761	2.80956	0.200233	-0.310893	3.38525	3.11303	0.585771	1.50703	0.706492	2.36606	2.02239	-0.23714	1182	P01011;P01011-2	P01011	Alpha-1-antichymotrypsin;Alpha-1-antichymotrypsin His-Pro-less	SERPINA3	SERPINA3	1.8677	1.48713	-0.380571
5.18507	4.18138	3.36585	3.28442	5.62398	3.05184	4.82551	4.91666	4.61501	2.18587	3.27065	3.53779	3.22279	3.10725	5.67338	2.87543	5.85867	0.223264	4.68373	4.03516	5.19162	0.75782	3.42979	3.08153	3.21002	0.104684	2.42348	2.86922	3.42994	4.21514	4.75288	2.67509	3.87147	4.63429	3.04006	4.99701	3.55079	4.37439	5.54282	4.12117	2.95744	1181	P01009;P01009-2;P01009-3;P20848	P01009;P01009-2;P01009-3	Alpha-1-antitrypsin;Short peptide from AAT	SERPINA1	SERPINA1	3.53779	3.49036	-0.0474269
-1.83618	-1.78018	-0.60472	-0.726997	-1.59809	-2.72762	-0.999245	-0.0408505	-2.22687	-0.302971	-0.934328	-1.20001	-1.53024	-0.691598	-2.17881	-1.63133	-2.3751	-2.52963	-2.72757	-1.27221	-1.55432	-0.952837	-3.03943	-1.41559	-0.601024	-0.79441	-2.80776	-2.24336	-1.79428	-0.95206	-2.15101	0.210555	-2.09336	-1.90215	-1.69051	-2.09031	-0.08242	-1.36062	-2.08208	-1.44907	-2.72807	2174	P30533	P30533	Alpha-2-macroglobulin receptor-associated protein	LRPAP1	LRPAP1	-1.20001	-1.7424	-0.542383
0.388662	-0.256317	0.63584	0.275568	-0.702822	2.17515	0.74243	0.407468	-1.6978	-0.168594	0.363444	1.24546	1.46015	0.355159	1.01493	0.0330252	-0.640735	0.559198	3.07316	-0.722476	0.959444	0.102749	0.71704	-0.549094	0.981551	-0.191298	-0.764267	-0.463957	-1.24261	0.478005	-0.62821	0.472333	0.221882	1.83337	0.0339292	-1.13316	-0.0537304	-0.485719	1.69865	-0.914453	1.06068	1625	P12814-3;P12814-2;P12814-4	P12814-3;P12814-2;P12814-4	Alpha-actinin-1	ACTN1	ACTN1	0.388662	0.0334772	-0.355185
0.404175	-0.582287	0.377933	0.0197545	-1.33838	1.89274	0.611334	0.0321325	-2.32356	-0.506253	-0.807794	1.01567	1.12186	0.16291	0.867276	-0.23596	-1.01675	0.329932	2.98405	-0.95496	0.708019	-0.153224	0.0913208	-0.705844	0.837329	-0.71788	-1.19083	-0.666714	-1.73556	0.0852996	-1.13923	0.164761	0.0628753	1.89937	0.0385904	-1.61836	-0.346484	-0.882915	1.49135	-0.97666	0.980056	1624	P12814	P12814	Alpha-actinin-1	ACTN1	ACTN1	0.16291	-0.194592	-0.357503
0.222783	0.251929	0.728263	0.618065	0.542543	0.935179	1.23082	0.89164	-0.37688	0.720466	0.738533	0.890748	0.693847	0.732949	0.76527	0.700462	0.523444	0.528171	0.878206	-0.464022	0.875476	-0.464368	0.270939	0.167718	0.922829	0.798051	0.442446	-0.192494	0.279873	0.824729	0.37148	0.97927	-0.00926893	1.0571	0.0245648	-0.268867	0.551155	0.400022	1.11822	-0.863765	0.873472	602	O43707;O43707-2;O43707-3	O43707;O43707-2;O43707-3	Alpha-actinin-4	ACTN4	ACTN4	0.728263	0.482945	-0.245318
2.34482	1.92897	1.65288	1.23958	1.49115	1.29215	2.27656	0.878712	0.767635	1.00574	1.55902	1.24005	1.60674	1.3927	1.58853	1.54876	1.03228	1.68698	1.4073	1.02879	1.48225	1.11838	1.19351	1.64041	1.5357	2.39893	2.29143	1.64887	0.999979	1.68654	1.26172	0.852205	1.82881	2.27485	1.55402	0.584468	1.52363	1.79495	2.2025	1.00242	1.27145	2287	P35611;P35611-3;P35611-2;P35611-6;P35611-4;P35611-5	P35611;P35611-3;P35611-2;P35611-6;P35611-4;P35611-5	Alpha-adducin	ADD1	ADD1	1.49115	1.52967	0.0385244
3.51637	2.76018	NaN	NaN	NaN	2.78513	NaN	2.77633	2.12094	2.59052	0.92188	NaN	NaN	NaN	2.21991	1.89082	2.65475	3.33438	3.18411	NaN	2.54461	NaN	1.69153	2.71236	NaN	NaN	2.69748	1.38642	NaN	NaN	2.79356	NaN	1.30214	NaN	2.2231	2.58972	NaN	1.31442	1.74831	1.66746	2.79259	2563	P49419-2;P49419;P49419-4	P49419-2;P49419;P49419-4	Alpha-aminoadipic semialdehyde dehydrogenase	ALDH7A1	ALDH7A1	2.67535	2.54461	-0.130742
0.196038	-0.192214	0.671208	0.453672	-0.170541	0.710618	0.945642	0.620649	-0.388967	0.357693	0.664346	0.534371	0.695379	0.556971	0.373348	0.444656	-0.0903674	0.345018	0.566779	-0.645142	0.333165	-0.166177	0.0658966	0.136605	0.670061	0.373151	0.0676459	-0.487766	-0.109903	0.627449	0.0730085	0.651069	-0.192238	0.557057	-0.299297	-0.392954	0.370617	0.186352	0.693139	-0.413655	0.169063	2950	P61163	P61163	Alpha-centractin	ACTR1A	ACTR1A	0.534371	0.152834	-0.381537
0.0421942	-0.602807	NaN	-0.0941512	-0.300665	0.527491	0.457517	-0.342741	-1.10281	-1.88304	0.358333	0.0857344	0.0159557	-0.395326	-0.627126	0.361482	-0.0498111	0.165752	-0.458571	-1.41379	-0.275772	-1.6742	0.559635	-0.0260473	0.209904	-1.12421	0.154697	-1.14743	-0.645648	0.297547	-0.0916015	0.190859	-0.61711	NaN	NaN	-0.982863	NaN	-2.06734	-0.268966	NaN	-0.214421	614	O43768;O43768-3;O43768-2;O43768-9;O43768-4;O43768-5;O43768-7;O43768-6;O43768-8	O43768;O43768-3;O43768-2;O43768-9;O43768-4;O43768-5;O43768-7;O43768-6	Alpha-endosulfine	ENSA	ENSA	-0.197408	-0.241693	-0.0442856
NaN	1.23737	-0.448291	-1.10725	-0.665454	NaN	1.2843	-0.883497	0.927247	-0.762026	-2.45067	-0.410793	-0.415915	-0.711278	0.766364	-1.56805	0.0254585	0.484619	-0.736575	1.62884	-0.680908	0.751435	NaN	1.6322	NaN	1.09459	2.6258	1.74796	-0.476091	0.474696	0.303283	0.181379	0.657947	NaN	1.14468	0.39795	1.21507	2.02412	0.420919	0.504574	1.08658	2317	P36888;P36888-2	P36888;P36888-2	Receptor-type tyrosine-protein kinase FLT3	FLT3	FLT3	-0.448291	0.504574	0.952866
-3.16441	-1.60277	0.214165	-0.0822504	-2.5793	-2.3724	0.0150502	-0.492096	-1.37625	-1.22135	-0.465332	0.504823	-0.712344	0.155046	-0.110613	-1.83983	-2.07315	-2.96449	-1.67939	-0.500487	-1.67402	-0.3261	-2.49096	-1.38116	-0.548251	-0.135924	-0.213262	-0.286771	-1.93169	-0.787068	-1.83549	-0.107718	-3.18162	-0.0882708	-0.592133	-1.46946	0.145476	-0.565227	-1.25857	-1.50562	-2.44922	1348	P06280	P06280	Alpha-galactosidase A	GLA	GLA	-0.492096	-1.31987	-0.827771
-0.721666	-0.574767	-0.0269213	0.126069	-0.510959	0.125365	-0.104987	-0.0172504	-0.495982	-0.098747	0.0812249	0.0379138	-0.343485	0.0364512	-0.347098	0.125405	-0.218294	-0.0210261	-0.356174	-0.661613	-0.155074	-0.523359	-0.271001	-0.362415	0.120228	-0.532293	-0.173261	-0.639268	-0.366029	0.0530592	-0.0760387	-0.0963009	-0.748272	-0.42294	-0.88427	-0.48397	-0.0992455	-0.581883	-0.522423	-1.3019	-0.111538	3433	Q12800-2;Q12800-3;Q12800-4;Q12800;Q9NZI6	Q12800-2;Q12800-3;Q12800-4;Q12800	Alpha-globin transcription factor CP2	TFCP2	TFCP2	-0.098747	-0.359295	-0.260548
0.332415	0.311731	-0.888094	-0.24409	-0.0669678	0.523049	0.625394	0.0808452	-0.308565	-1.10921	-0.0126152	-0.273965	0.140414	-0.430432	-0.315207	0.359107	0.314974	0.461262	0.218101	-0.975717	-0.211885	-1.63493	0.308825	0.929868	0.0236749	-0.241165	0.194326	-0.930238	0.325916	0.205594	-0.107152	-0.117011	-0.0643455	-1.22488	-1.7538	0.136649	-0.591287	-0.212306	0.0471594	-0.91782	0.274161	6876	Q9C0B1;Q9C0B1-4;Q9C0B1-2	Q9C0B1	Alpha-ketoglutarate-dependent dioxygenase FTO	FTO	FTO	-0.0669678	-0.0203353	0.0466325
4.55888	3.07606	1.90705	1.68106	2.64229	1.73957	-0.990928	0.985135	2.60203	2.08249	1.07994	1.3499	0.650027	2.20511	2.68816	NaN	1.79291	2.60753	1.82392	2.77755	2.69581	3.0894	NaN	1.77328	NaN	2.28316	NaN	1.77981	2.80415	2.24053	-0.282798	1.27938	3.30771	1.64225	1.27917	1.70904	1.67925	2.93797	3.20474	2.84085	2.99357	2280	P35475;P35475-2	P35475;P35475-2	Alpha-L-iduronidase	IDUA	IDUA	1.90705	2.26185	0.354797
-0.635306	-0.218327	0.531486	0.36812	-0.456495	0.642497	-0.579536	0.662088	0.125114	0.884872	0.142144	0.257348	0.147677	0.460375	0.272702	-0.372785	-0.329107	0.00606435	0.904968	0.921567	0.00614301	0.464155	-0.66218	0.426895	0.560379	0.650141	-0.764929	-0.615675	-0.129212	0.146492	0.17095	0.217257	-0.261596	0.264063	-0.464094	0.194891	0.80729	0.120511	-0.337824	0.0476103	-0.797128	4060	Q16706	Q16706	Alpha-mannosidase 2	MAN2A1	MAN2A1	0.257348	0.0840606	-0.173287
0.101633	0.2506	0.0476894	0.740556	0.209729	0.307452	1.25905	0.756647	NaN	-0.422295	0.744486	0.990014	0.708934	0.509676	0.330022	0.904983	0.125756	0.739596	-0.0774333	-1.24874	0.846078	NaN	0.26817	0.47781	0.85405	-0.0761094	0.336616	-0.76518	-0.744741	0.608398	0.647861	0.800934	-0.173466	-0.511154	-0.297116	-0.153564	-0.21312	-0.859853	0.982764	-0.826339	0.14029	7450	Q9NTJ4-3;Q9NTJ4-2;Q9NTJ4;Q9NTJ4-4	Q9NTJ4-3;Q9NTJ4-2;Q9NTJ4;Q9NTJ4-4	Alpha-mannosidase 2C1	MAN2C1	MAN2C1	0.419849	0.125756	-0.294092
NaN	-0.204115	-0.646772	NaN	0.131718	NaN	NaN	1.02522	-0.133426	-0.805383	0.904904	NaN	NaN	NaN	0.195182	NaN	NaN	NaN	1.43915	NaN	-0.797124	NaN	NaN	NaN	NaN	NaN	0.29642	-0.284217	NaN	NaN	NaN	NaN	0.303437	NaN	0.095661	0.174449	-1.15996	-2.13154	NaN	NaN	0.590999	2576	P49641;P49641-1;P49641-2	P49641;P49641-1;P49641-2	Alpha-mannosidase 2x	MAN2A2	MAN2A2	-0.000853911	0.135055	0.135909
-0.803095	-1.10785	0.775397	0.467571	-1.27459	-0.47518	-1.28361	0.591088	-0.2547	0.485613	-0.275948	0.308392	0.0734015	0.802521	0.0987852	-0.145688	-0.357517	-0.531507	-1.40057	-0.723522	-0.56337	0.334673	-0.716981	-0.032317	0.532374	-0.61583	0.111176	-0.0633205	-0.965669	0.184328	-0.709103	0.299646	-0.708723	-0.341437	-0.277655	-0.190295	0.246644	-0.607749	-0.577962	-0.609319	-1.31045	1770	P17050	P17050	Alpha-N-acetylgalactosaminidase	NAGA	NAGA	0.0734015	-0.444512	-0.517914
NaN	-0.803	0.538949	0.0544056	0.539478	0.59117	0.129848	0.113428	0.811887	-0.625974	-0.17635	0.176492	0.224435	0.145939	0.311786	0.174325	0.479598	-1.12447	0.875482	0.601198	0.658346	1.05391	0.348305	-0.694895	0.369451	0.541975	-0.480611	0.148341	1.69393	0.439819	0.967219	0.868956	1.298	1.10212	-0.310831	0.443671	0.307248	0.264892	0.467216	0.141985	1.13551	2810	P54802	P54802	Alpha-N-acetylglucosaminidase;Alpha-N-acetylglucosaminidase 82 kDa form;Alpha-N-acetylglucosaminidase 77 kDa form	NAGLU	NAGLU	0.161215	0.455443	0.294228
-0.0461494	-0.443435	0.335282	0.183506	-0.107849	-0.0637734	0.259782	-6.32917e-05	-0.795059	0.121906	-0.0412604	0.121864	0.0681519	0.197975	-0.266931	-0.50476	-0.853891	-0.536659	0.212267	-0.391914	0.061378	0.306183	-0.511782	-0.0862171	0.331811	-0.119291	-0.495238	-0.0624803	-0.123782	-0.272271	-0.653888	0.289499	-0.584047	0.62136	-0.286413	-0.619672	0.332921	-0.365761	0.37136	-0.042147	-1.0119	2815	P54920	P54920	Alpha-soluble NSF attachment protein	NAPA	NAPA	-6.32917e-05	-0.198027	-0.197963
4.36297	NaN	NaN	NaN	NaN	3.32465	6.26842	3.28493	3.2739	NaN	3.39898	2.60844	3.84436	NaN	NaN	3.52523	NaN	5.36201	5.32036	NaN	NaN	3.90495	4.93453	4.81181	2.72876	NaN	NaN	3.79579	NaN	NaN	5.29352	NaN	3.3168	4.00883	4.19874	2.4947	NaN	NaN	4.12439	2.3561	3.06821	2333	P37840-2;P37840;P37840-3;Q16143	P37840-2;P37840;P37840-3	Alpha-synuclein	SNCA	SNCA	3.36181	3.95689	0.595075
-1.3725	-1.18823	-0.851925	-0.697529	-1.30634	-0.449458	-0.955673	-0.855182	-0.978104	-0.929046	-0.685523	-0.691032	-0.931495	-1.03864	-0.984067	-0.773871	-1.08289	-1.10872	-1.01617	-0.888472	-1.7803	-1.36092	-0.658158	-0.887627	-0.610641	-0.598909	-0.97447	-1.16315	-1.03182	-0.909869	-0.984296	-0.491539	-1.35095	-0.689136	-1.22696	-1.28738	-0.995252	-0.982289	-1.98321	-1.48802	-0.728871	2357	P40222	P40222	Alpha-taxilin	TXLNA	TXLNA	-0.931495	-0.989774	-0.0582791
1.04853	1.01181	0.184087	0.216684	0.731887	-0.154854	-0.113659	0.309984	0.197261	NaN	-0.0998775	0.0342347	0.307091	-0.207264	0.844513	0.389274	0.735547	1.30335	0.485002	0.882617	0.488116	0.657679	0.340072	1.15854	-0.0169747	0.393561	0.934336	0.455696	1.18379	-0.100675	0.916042	NaN	0.182416	0.729371	NaN	0.670508	0.682301	0.774406	NaN	NaN	-0.24568	5591	Q8TCU4-2;Q8TCU4;Q8TCU4-3	Q8TCU4-2;Q8TCU4;Q8TCU4-3	Alstrom syndrome protein 1	ALMS1	ALMS1	0.206973	0.664094	0.457121
-0.916101	-1.21369	-2.37446	-1.36164	-1.49675	-0.711176	-2.11535	-1.83402	-0.977726	-1.78555	-1.47682	-1.1167	-1.18168	-1.68702	-1.37524	-0.735396	-1.00049	-0.886682	-1.32228	-1.55245	-1.0944	-2.16501	-0.260892	-1.55353	-1.3245	-2.1052	-0.55091	-1.77973	-0.853814	-1.02439	-0.850211	-2.58413	-0.957495	-2.3165	-2.10014	-1.07876	-2.1151	-1.79744	-0.980758	-1.97676	-0.585412	3333	Q06203	Q06203	Amidophosphoribosyltransferase	PPAT	PPAT	-1.37524	-1.20834	0.166902
-0.734849	-1.02641	-0.203208	-0.390566	-1.32626	-0.572599	-0.740832	-0.651289	-1.08436	-0.647573	-0.377821	-0.424027	-0.394862	-0.409568	-0.72241	-0.378196	-1.015	-0.436213	-0.651442	-0.783338	-0.805456	-0.686464	-0.797524	-1.01941	-0.359321	-0.750729	-0.806722	-0.975537	-0.927291	-0.622601	-0.80516	-0.451203	-1.01778	-0.73316	-0.987774	-1.18989	-0.724514	-0.762996	-0.958626	-0.925871	-0.635478	3454	Q12904;Q12904-2	Q12904;Q12904-2	Aminoacyl tRNA synthase complex-interacting multifunctional protein 1;Endothelial monocyte-activating polypeptide 2	AIMP1	AIMP1	-0.647573	-0.790431	-0.142857
-1.08957	-2.22041	-2.45397	-1.82103	-1.91799	-0.787631	-1.95906	-2.41825	-2.47443	-4.17272	-2.22425	-1.23832	-1.16292	-1.76455	-2.53234	-1.99582	-1.65699	-1.81563	-1.41924	-2.21388	-1.1968	-2.69804	-0.836564	-1.03597	-1.91553	-2.46467	-1.18986	-1.87044	-1.41711	-1.53492	-1.90532	-0.310985	-0.609525	-2.42777	-2.55446	-2.21148	-3.62461	-2.77118	-1.57795	-1.92592	-0.28657	3286	Q03154;Q03154-4;Q03154-2;Q03154-3	Q03154;Q03154-4;Q03154-2;Q03154-3	Aminoacylase-1	ACY1	ACY1	-1.95906	-1.84303	0.116027
-0.488265	-1.04564	-0.353357	0.248801	-0.908583	-1.12602	0.664216	0.393835	-2.11479	-1.23353	0.826634	0.290459	0.243185	0.376428	-0.0427805	-0.49943	-0.979735	0.622824	-1.51186	-1.83582	-0.468941	-2.00596	-1.0804	0.0529062	0.691147	-0.439941	-0.984044	-1.73135	-1.26482	0.33626	-0.25954	0.877061	-0.886138	-1.54877	-1.40966	-1.07195	-1.2948	-0.939006	-0.220252	-1.46963	-0.343528	7052	Q9H4A4	Q9H4A4	Aminopeptidase B	RNPEP	RNPEP	-0.0427805	-0.95937	-0.91659
-4.11957	-1.37367	-1.45431	-0.845019	-2.72424	-4.08544	-3.49522	1.01002	0.482144	1.04221	-1.05053	-1.51073	-1.90631	-0.649999	0.238877	-0.160442	-0.933512	-3.61943	-1.40437	-1.06912	-1.87881	-0.503711	-1.1041	-4.86319	-0.335672	-0.843729	-2.60858	-2.32572	-2.03318	-1.1408	0.261934	-1.22895	-1.80718	0.343798	0.679493	-0.209971	-0.726389	-1.02049	-1.79868	-1.63903	-2.64363	1707	P15144	P15144	Aminopeptidase N	ANPEP	ANPEP	-1.37367	-1.12245	0.251217
NaN	2.04971	NaN	NaN	NaN	NaN	1.07837	NaN	1.1815	NaN	0.715419	NaN	0.799083	NaN	NaN	NaN	NaN	NaN	NaN	NaN	-0.10306	NaN	NaN	2.31093	NaN	NaN	NaN	NaN	NaN	NaN	NaN	NaN	1.19199	NaN	NaN	1.05524	NaN	NaN	NaN	NaN	1.49657	3368	Q08117;Q08117-2	Q08117;Q08117-2	Amino-terminal enhancer of split	AES	AES	1.07837	1.19199	0.113621
0.938996	-0.515096	0.365737	1.16135	0.601571	1.37138	0.13574	0.950013	0.03381	0.131308	0.836296	0.984279	1.24044	0.404382	0.843158	1.28766	0.736668	0.37844	1.73976	-0.27614	1.36522	-0.21478	1.32552	0.515857	1.11047	-0.28752	-0.00721021	-0.261241	0.333978	0.966875	1.06016	0.388508	0.567307	0.764284	-0.475378	0.468367	0.196991	-0.372262	1.35833	NaN	0.98573	3228	Q01433;Q01433-2;Q01433-3;Q01433-5;Q01433-4	Q01433;Q01433-2;Q01433-3;Q01433-5;Q01433-4	AMP deaminase 2	AMPD2	AMPD2	0.836296	0.515857	-0.320439
1.23813	1.53188	0.442525	0.487698	1.7974	0.199668	0.295399	0.559049	-0.613691	0.273599	0.881039	0.908935	1.32896	0.468579	1.01613	-0.181819	0.676001	1.75312	0.819854	-0.472945	2.55829	0.931701	1.73623	-0.00308887	0.893485	-0.343205	0.518986	0.141526	0.98134	0.783443	1.20235	0.414946	1.08383	2.25316	1.60551	0.388995	-0.279164	-0.438598	3.87988	NaN	1.46703	3227	Q01432;Q01432-5;Q01432-4;Q01432-6;Q01432-3;Q01432-2;P23109-2;P23109	Q01432;Q01432-5;Q01432-4;Q01432-6;Q01432-3	AMP deaminase 3	AMPD3	AMPD3	0.559049	0.819854	0.260806
-0.713664	-0.756422	-1.94296	-1.76006	-0.159787	-0.924445	-1.50188	-1.76672	-0.113669	-0.950064	-3.29821	-1.91235	-1.41589	-1.82788	-1.19094	-1.1218	-0.115749	-0.3597	-0.577351	0.208396	-0.554845	-0.446486	0.0663538	-0.340625	-1.54993	-1.18574	-0.165274	0.0858199	-0.0276138	-1.5915	-0.662146	-1.52277	0.0752633	-0.773701	0.27119	-0.0510097	-0.655738	-0.768699	-0.484885	-0.0297474	-0.503501	5473	Q8NEJ9-2;Q8NEJ9	Q8NEJ9-2;Q8NEJ9	Neuroguidin	NGDN	NGDN	-1.41589	-0.465686	0.950202
0.693035	-0.161665	0.436314	0.0843833	-0.691619	NaN	0.488266	0.537326	-0.739068	0.225304	0.176132	0.421662	-0.440275	0.278752	0.425859	-0.0454681	-0.856026	NaN	-0.214714	0.503557	0.148732	0.529535	-1.29056	0.305619	-0.213824	0.229464	-1.10397	-0.72095	-1.37215	0.302305	-0.0338927	1.13578	0.706142	-0.0591608	-0.147926	-0.42036	0.171352	0.467498	NaN	-0.151125	-0.960266	3339	Q06481;Q06481-3;Q06481-6;Q06481-2;Q06481-4;Q06481-5	Q06481;Q06481-3;Q06481-6;Q06481-2;Q06481-4;Q06481-5	Amyloid-like protein 2	APLP2	APLP2	0.252028	-0.0523145	-0.304343
-0.675705	NaN	NaN	-0.748932	-1.14507	0.00124767	-2.62441	-1.92927	-1.2693	NaN	NaN	-0.885956	-0.820584	-1.19968	-1.42321	-0.683552	-0.825147	-0.410764	-1.02384	NaN	-1.19	-2.21412	-0.12405	-1.01108	NaN	NaN	-0.844021	NaN	-0.673057	-0.970526	-0.540702	-0.739134	-0.340173	NaN	NaN	-1.0083	NaN	NaN	-0.368505	-1.48191	-0.554194	5582	Q8TCF1;Q8TCF1-4;Q8TCF1-3;Q8TCF1-2	Q8TCF1;Q8TCF1-4;Q8TCF1-3	AN1-type zinc finger protein 1	ZFAND1	ZFAND1	-1.14507	-0.78214	0.362934
-0.00375999	0.261503	NaN	-0.291998	NaN	-0.425698	0.589523	-0.114171	0.633077	-0.378223	NaN	NaN	-0.569081	NaN	NaN	0.547899	0.384091	0.286325	NaN	NaN	NaN	NaN	NaN	-0.433509	-0.983912	NaN	NaN	NaN	NaN	0.194706	0.201549	NaN	NaN	NaN	NaN	NaN	NaN	NaN	0.475857	NaN	NaN	4502	Q6FIF0-2;Q6FIF0	Q6FIF0-2;Q6FIF0	AN1-type zinc finger protein 6	ZFAND6	ZFAND6	-0.114171	0.243937	0.358108
-0.810117	-0.893102	-1.85466	-0.721753	-1.17463	-0.131245	-0.329364	-0.872869	-1.3437	-1.66177	-0.648745	-0.495479	-0.842767	-0.850428	-1.2897	-0.58693	-0.793412	-0.707146	-0.789923	-1.52507	-1.10181	-1.02017	-0.45959	-0.702234	-0.367858	-1.44649	-0.683623	-1.46458	-0.918481	-0.672598	-1.02116	-0.200963	-1.12479	-1.79517	-1.69235	-1.11235	-1.62057	-1.80379	-1.51658	-1.46294	-0.475557	4501	Q6FI81;Q6FI81-3;Q6FI81-2	Q6FI81;Q6FI81-3	Anamorsin	CIAPIN1	CIAPIN1	-0.850428	-1.02066	-0.170236
-1.05826	-0.739667	-0.783222	-0.502529	-0.667761	0.0320421	-0.670397	-0.832285	-0.375639	-0.591175	-0.587471	-0.831442	-0.790625	-0.644212	-0.458361	-0.728771	-0.589781	-0.665071	-0.774647	-0.250114	-1.35215	-0.547932	-0.420261	-0.26759	-0.776833	-0.459058	-0.397782	-0.0994439	-0.525506	-0.735321	-0.237137	-0.787547	-0.78755	-0.462779	-0.411356	-0.508022	-0.614034	-0.356728	-0.487698	-0.380892	-0.713383	6974	Q9H1A4	Q9H1A4	Anaphase-promoting complex subunit 1	ANAPC1	ANAPC1	-0.667761	-0.516764	0.150997
0.429817	-0.632613	-0.888176	-0.41813	-0.764282	0.190875	-0.0356414	-0.780227	-0.212151	-0.828473	0.207283	0.0393235	-0.474831	-0.51148	-0.472964	-1.09041	-1.30278	-0.838	-0.302625	-0.738339	-0.285939	-0.921196	-0.528427	-0.785907	-0.149511	-0.624727	-0.911366	-0.649242	-0.794329	-0.617071	-0.671795	0.270265	-1.02657	-0.207737	-0.711752	-0.667119	-1.15836	-0.802613	0.187086	-0.6401	0.0605576	7940	Q9UJX6-2;Q9UJX6	Q9UJX6-2;Q9UJX6	Anaphase-promoting complex subunit 2	ANAPC2	ANAPC2	-0.472964	-0.669457	-0.196493
NaN	-0.865785	-0.729023	-0.443036	-0.868366	0.168291	-0.272434	-0.634626	-0.216275	-0.67994	-0.310282	-0.632227	-0.56578	-0.450303	-0.135466	-0.502689	-0.64014	NaN	-0.51796	-0.366628	1.00713	-0.478586	-0.210822	-0.341555	-0.724762	0.0786362	0.123107	0.0085466	-0.124181	-0.208418	-0.307192	-0.409914	-1.01152	NaN	-0.899679	-0.348739	-0.512286	-0.522755	NaN	-0.27772	-0.848566	7939	Q9UJX5;Q9UJX5-3;Q9UJX5-2	Q9UJX5;Q9UJX5-3;Q9UJX5-2	Anaphase-promoting complex subunit 4	ANAPC4	ANAPC4	-0.508041	-0.366628	0.141413
NaN	-0.661337	-0.693484	-0.808108	-1.11429	-0.632746	-0.954031	-1.09577	-0.83101	-0.96598	-0.553282	-0.871837	-0.61602	-0.867257	-0.5456	-0.575607	-0.851581	-0.581986	-0.83274	-0.504592	-0.900568	-0.365315	-0.625024	-0.500421	-0.949514	-0.66102	-0.648197	-0.370228	-0.642738	-0.79656	-0.41676	-1.10377	-1.01363	-0.643157	-0.391648	-0.372354	-0.726295	-0.460364	-0.770248	-0.617112	-1.20743	7938	Q9UJX4;Q9UJX4-3;Q9UJX4-2	Q9UJX4;Q9UJX4-3	Anaphase-promoting complex subunit 5	ANAPC5	ANAPC5	-0.819559	-0.642948	0.176611
-1.32252	-1.00869	-0.813699	-1.00168	-0.893361	-0.356227	-0.546979	-0.499195	-0.248434	-0.688402	-0.99798	-1.26385	-1.10477	-1.07003	-0.623447	-0.823895	-0.635173	-0.677667	-0.764546	-0.211785	-0.911654	-0.626307	-0.698677	-0.0666099	-1.2295	-0.675541	-0.000443698	0.0322713	-0.557877	-1.11647	-0.567006	-0.996727	-0.628313	-0.515043	-0.26668	-0.503688	-0.669346	-0.244316	-1.45062	-0.682815	-0.849522	7937	Q9UJX3-2;Q9UJX3	Q9UJX3-2;Q9UJX3	Anaphase-promoting complex subunit 7	ANAPC7	ANAPC7	-0.893361	-0.65226	0.241101
-2.11004	-0.559904	-0.358594	-0.954618	-0.836966	-0.425837	-0.478169	-0.737275	-0.838351	-0.258631	-0.535272	-0.976732	-1.14658	-0.674577	-1.02589	-1.17753	-1.22605	-1.24861	-0.600507	-0.003828	-1.19365	-0.560515	-0.972597	-0.701087	-0.78017	-0.123505	-1.7746	-0.635538	-0.787383	-1.18759	-1.12116	-0.312819	-0.969523	-0.284418	-1.00808	-0.958203	-0.0423582	-0.420597	-2.07474	-0.207888	-0.935809	8414	Q9Y679-2;Q9Y679;Q9Y679-3	Q9Y679-2;Q9Y679;Q9Y679-3	Ancient ubiquitous protein 1	AUP1	AUP1	-0.737275	-0.861596	-0.124322
NaN	-0.127034	NaN	NaN	-1.88215	0.124557	-1.35838	NaN	NaN	NaN	-1.85469	NaN	NaN	-1.10846	-0.890928	NaN	NaN	0.000626078	0.163008	0.152756	NaN	0.481098	-1.05901	NaN	NaN	-2.08916	NaN	NaN	-0.992607	-1.4177	NaN	NaN	NaN	0.739461	-0.361483	NaN	-0.917312	-1.2356	-1.07947	NaN	-1.43306	7526	Q9NVV5-3;Q9NVV5-2;Q9NVV5-6;Q9NVV5-5;Q9NVV5-4;Q9NVV5	Q9NVV5-3;Q9NVV5-2;Q9NVV5-6;Q9NVV5-5;Q9NVV5-4;Q9NVV5	Androgen-induced gene 1 protein	AIG1	AIG1	-1.10846	-0.954959	0.153499
-1.52512	-1.61928	-2.00336	0.0472375	-1.64087	-1.62076	-1.63732	-1.77965	-2.05802	-2.18578	-0.72737	-1.08009	-0.700147	-1.48036	-1.30034	-1.66245	-1.20412	-1.51563	-1.34337	-1.67373	-1.15318	-1.70871	-0.852123	-1.421	-0.77265	-1.71095	-0.576042	-0.131505	-0.919655	-1.21621	-1.3553	-0.839838	-1.77602	-0.951654	-0.606727	-1.50597	-1.78074	-1.92522	-1.66785	NaN	-0.928477	3640	Q13685	Q13685	Angio-associated migratory cell protein	AAMP	AAMP	-1.61928	-1.34337	0.275903
NaN	-2.72424	-1.75123	-1.91653	NaN	NaN	-1.97143	NaN	NaN	-2.46666	NaN	NaN	NaN	-1.56522	-1.67637	NaN	NaN	NaN	-1.48454	NaN	NaN	NaN	NaN	NaN	-1.31234	-1.90853	NaN	NaN	NaN	NaN	NaN	NaN	NaN	0.0090066	NaN	NaN	NaN	-1.91122	NaN	NaN	NaN	1183	P01019	P01019	Angiotensinogen;Angiotensin-1;Angiotensin-2;Angiotensin-3;Angiotensin-4;Angiotensin 1-9;Angiotensin 1-7;Angiotensin 1-5;Angiotensin 1-4	AGT	AGT	-1.91653	-1.48454	0.431981
0.37619	-0.503068	-0.399355	-0.544652	NaN	-1.25327	1.46414	-0.922548	-1.19867	0.409677	-0.213355	-0.75347	1.05471	-0.458539	1.3657	3.14321	-0.552321	-2.94975	-1.01575	-0.59155	5.57933	0.400051	-2.28115	-2.05266	-0.708503	-0.709185	-0.917459	-0.521326	0.1756	-1.13511	4.20521	0.173454	-2.95154	1.50633	0.899174	0.302765	-0.350007	-0.418317	4.40514	-1.11329	-1.38793	1308	P04920-2;P04920-3;P04920;P48751-2;P48751;P48751-3	P04920-2;P04920-3;P04920	Anion exchange protein 2	SLC4A2	SLC4A2	-0.428947	-0.536824	-0.107877
-0.0743581	NaN	NaN	-0.413594	NaN	-0.332407	-0.724334	NaN	-0.0913236	NaN	NaN	NaN	NaN	NaN	-0.416	NaN	-0.151169	NaN	0.233259	1.83422	NaN	0.700486	0.900992	0.179062	NaN	0.0206137	NaN	0.555841	0.587726	NaN	-0.998036	NaN	0.722025	0.195181	0.605903	NaN	NaN	0.78778	-0.466463	NaN	0.834182	625	O43824	O43824	Putative GTP-binding protein 6	GTPBP6	GTPBP6	-0.373	0.571783	0.944784
-0.419039	-0.586731	-0.184565	-0.442814	-0.951272	-0.401593	-0.29987	-1.05378	-0.681718	-0.526765	-0.493423	-0.475046	-0.406719	-0.319109	-0.202009	-0.382163	-0.874424	-0.654979	-0.467944	-0.410027	-0.661001	-0.464368	-0.285471	-0.56838	-0.449507	-0.617524	-0.557548	-0.727812	-0.525131	-0.536286	-0.585144	-0.034533	-0.746519	-0.665872	-0.44096	-1.01948	-0.516188	-0.404209	-1.14994	-0.438552	-0.663691	5140	Q8IWZ3;Q8IWZ3-4;Q8IWZ3-6;Q8IWZ3-5;Q8IWZ3-2;Q8IWZ3-3	Q8IWZ3;Q8IWZ3-4;Q8IWZ3-6	Ankyrin repeat and KH domain-containing protein 1	ANKHD1	ANKHD1	-0.442814	-0.546917	-0.104103
-1.11503	-0.409333	-0.644143	-0.673994	-0.675318	-0.229331	-0.293425	-0.590956	0.162035	-0.365734	-0.194438	-1.05486	-0.756946	-0.84159	-0.50079	-0.837161	-0.485646	-0.563625	-0.363228	0.17871	-0.691403	-0.111555	-0.141328	-0.0517599	-0.864325	-0.274759	-0.276425	-0.158952	-0.212772	-0.309545	-0.661099	-0.291352	0.101873	-0.957532	-0.300429	-0.627253	-0.348064	-0.0667314	-1.27949	-0.156425	-0.298544	5036	Q86XL3;Q86XL3-2;Q86XL3-3	Q86XL3;Q86XL3-2	Ankyrin repeat and LEM domain-containing protein 2	ANKLE2	ANKLE2	-0.590956	-0.299487	0.291469
-0.189921	-0.0262152	-0.378533	-0.343789	0.0442891	0.726322	-0.0535711	NaN	NaN	NaN	NaN	NaN	0.0835709	-0.372842	0.332414	0.212709	0.154433	0.808462	0.28939	-0.192462	0.0284617	-0.65691	0.466881	0.559972	-0.330743	NaN	-0.118602	NaN	0.533208	-0.0584869	-0.48889	-0.531404	0.207027	NaN	NaN	-0.344701	-0.339169	NaN	-0.0768323	-0.699038	1.00896	5093	Q8IV38	Q8IV38	Ankyrin repeat and MYND domain-containing protein 2	ANKMY2	ANKMY2	-0.0398932	-0.0584869	-0.0185937
NaN	-0.898649	0.211135	0.684396	-1.48124	0.195178	0.333728	0.131943	-1.20491	-0.360967	0.565471	0.688822	0.375804	NaN	1.07779	-0.0889097	-0.791628	-0.0817502	0.807899	NaN	0.0592714	NaN	NaN	0.247832	0.0268168	-1.33241	-0.190474	NaN	NaN	NaN	-0.615899	-0.223652	NaN	NaN	NaN	NaN	-0.808815	-1.39178	NaN	NaN	-1.3816	5824	Q92625;Q92625-2	Q92625	Ankyrin repeat and SAM domain-containing protein 1A	ANKS1A	ANKS1A	0.211135	-0.207063	-0.418198
-0.627305	NaN	-1.46174	NaN	NaN	NaN	-0.428355	-1.10664	-0.783142	-0.602209	NaN	-0.520069	-0.245118	NaN	-1.00046	-0.836794	-1.06359	-0.0802878	-1.14974	NaN	-0.64663	-1.01984	-1.31015	-0.984563	-0.339578	-0.979599	-0.532371	-0.320487	-1.03409	-1.19576	-0.763479	-0.376807	-0.865253	NaN	NaN	-0.881237	-1.3663	-0.599247	NaN	NaN	-0.591195	7143	Q9H8Y5	Q9H8Y5	Ankyrin repeat and zinc finger domain-containing protein 1	ANKZF1	ANKZF1	-0.627305	-0.865253	-0.237948
1.37659	0.93118	1.2096	1.42225	1.11651	1.4273	0.93927	0.990001	0.181905	1.22279	1.52045	1.56438	1.28534	1.52685	1.38175	1.58231	1.54797	1.15497	0.921172	NaN	1.27747	0.881842	1.77386	1.12411	1.58405	0.541061	1.86196	0.271399	0.36575	1.37966	1.07082	1.14561	0.176795	1.23047	0.307897	0.852966	1.1252	0.998105	1.61407	-0.00495458	0.797477	5202	Q8IZ07	Q8IZ07	Ankyrin repeat domain-containing protein 13A	ANKRD13A	ANKRD13A	1.28534	1.12411	-0.161231
-1.69149	-0.569728	NaN	-0.761661	-0.432686	NaN	-0.847935	-1.14263	-0.122236	-0.594467	-0.848466	-0.989351	-1.00407	-0.371508	-0.92594	-0.599723	-0.832539	NaN	-0.274957	-0.229733	-1.02965	-0.616856	-0.273015	-1.06422	NaN	-0.5131	-1.11308	NaN	-0.253047	-0.998512	-0.650732	-1.03406	-0.660645	NaN	-0.302951	-0.557039	-0.88271	-0.562346	NaN	NaN	-0.856958	786	O75179-7;O75179-2;O75179;O75179-6;O75179-3;O75179-5	O75179-7;O75179-2;O75179;O75179-6;O75179-3	Ankyrin repeat domain-containing protein 17	ANKRD17	ANKRD17	-0.847935	-0.633794	0.214141
0.46122	0.832259	NaN	0.561626	1.51473	1.35087	NaN	0.120816	-0.299617	-0.0955808	NaN	0.0452101	-0.20721	-0.0739152	NaN	NaN	-0.0657572	0.66635	0.622785	0.671405	0.837697	0.272954	0.515761	-0.184874	-0.256443	0.256895	-0.313954	0.487944	1.58453	0.00687961	0.524568	0.752151	0.509971	1.26569	-0.0331561	-0.974574	0.473016	0.738532	-0.086235	NaN	0.928058	6323	Q96NW4	Q96NW4	Ankyrin repeat domain-containing protein 27	ANKRD27	ANKRD27	0.120816	0.498957	0.378141
NaN	-0.376651	1.41846	1.31482	0.153231	NaN	1.33172	0.910865	NaN	0.732065	0.217177	NaN	1.33351	1.2377	0.478368	1.24234	0.242331	NaN	NaN	NaN	NaN	NaN	NaN	NaN	0.876919	1.16822	NaN	NaN	NaN	1.38115	1.17525	NaN	NaN	NaN	NaN	0.531174	0.341017	0.565126	1.0746	NaN	-0.430458	58	A6NJG2	A6NJG2	Ankyrin repeat domain-containing protein SOWAHD	SOWAHD	SOWAHD	0.910865	0.876919	-0.0339465
4.49975	NaN	NaN	NaN	3.01135	3.76001	3.24426	3.0591	NaN	3.7749	NaN	NaN	3.72846	2.63634	NaN	NaN	NaN	4.52623	3.55418	NaN	3.44004	2.10787	3.59071	NaN	2.78923	NaN	NaN	3.13194	2.55815	NaN	3.97629	NaN	3.18578	3.57743	3.27075	3.972	NaN	NaN	4.47232	2.6077	3.19861	1743	P16157-8;P16157-5;P16157-16;P16157-3;P16157;P16157-12;P16157-14;P16157-21;P16157-9;P16157-6;P16157-7;P16157-4;P16157-13;P16157-10;P16157-15;P16157-11;P16157-2	P16157-8;P16157-5;P16157-16;P16157-3;P16157;P16157-12;P16157-14;P16157-21;P16157-9;P16157-6;P16157-7;P16157-4;P16157-13;P16157-10;P16157-15;P16157-11;P16157-2	Ankyrin-1	ANK1	ANK1	3.48636	3.3554	-0.130963
5.06391	5.54231	3.64051	3.29031	4.05932	2.8263	4.25196	4.13732	5.34023	4.76631	3.37366	3.18131	3.59356	3.32306	5.2154	4.54406	4.51513	4.36732	3.35157	4.79906	4.13169	4.36982	4.04312	4.32945	2.97754	6.26785	2.57807	2.41884	3.60523	4.11899	5.31235	3.93187	4.97666	4.98905	3.23595	5.20775	5.06745	5.55153	4.92519	3.86298	4.84558	1276	P04083	P04083	Annexin A1	ANXA1	ANXA1	4.05932	4.36857	0.309254
0.570767	0.0787751	0.621023	0.377407	0.347656	0.303858	0.37486	1.10467	1.14882	1.22468	0.408545	0.341081	0.32205	0.744486	0.881256	0.789246	0.881929	0.610209	0.0682616	0.83236	1.27027	0.892728	-0.526478	0.38169	0.347592	0.525289	0.789622	1.00798	0.288582	0.42176	1.0097	0.0178454	0.36293	1.98761	0.858297	0.947486	0.711726	0.470587	1.8711	0.385666	-0.165852	2661	P50995-2;P50995;P27216;P27216-2	P50995-2;P50995	Annexin A11	ANXA11	ANXA11	0.408545	0.660967	0.252422
-1.7365	-2.47001	-3.38112	-1.5625	-3.29259	-2.81032	-4.35106	-1.96463	-2.7476	-2.46989	-3.15316	-3.52024	-2.68739	-3.73763	-2.4759	-3.65355	-2.59284	-1.34738	-2.02369	-0.96089	-2.19067	-0.851692	-2.65593	-1.83779	-3.3711	-1.39713	-1.4181	-0.727774	-0.890481	-2.49584	-3.10951	-1.28112	-1.34916	-1.34929	-1.63644	-2.51665	-2.52473	-2.90491	-1.77601	-0.908357	-2.1783	4079	Q16850;Q16850-2	Q16850;Q16850-2	Lanosterol 14-alpha demethylase	CYP51A1	CYP51A1	-2.7476	-1.8069	0.940703
2.31607	3.07354	2.76294	1.51759	NaN	3.25945	4.68271	3.05582	NaN	3.32454	0.3091	2.36208	3.55105	3.25599	4.71027	3.42456	1.70283	NaN	3.67123	2.76446	4.94684	4.30905	NaN	NaN	NaN	3.05864	NaN	1.94556	2.25623	2.476	2.25543	NaN	1.93693	5.55712	3.39637	NaN	3.96634	3.02449	6.5912	NaN	NaN	1618	P12429	P12429	Annexin A3	ANXA3	ANXA3	3.07354	3.05864	-0.0148976
-0.487203	-0.0360471	0.152222	0.0164891	-1.37147	-0.92568	-0.894854	-0.0396864	0.0409968	-0.0268202	-0.115673	-0.125342	-0.312047	0.028881	-0.191236	-0.0118594	-0.310265	-1.57445	-0.993475	-0.138121	-0.177475	0.227859	-0.196384	-0.897688	-0.369461	-0.184596	-0.142973	0.142376	-0.750662	-0.377159	-0.0547412	-0.369722	-0.983115	0.772883	0.134415	-0.174893	0.250367	0.00237876	0.0744952	0.420812	-0.745738	1486	P09525;P09525-2	P09525;P09525-2	Annexin A4	ANXA4	ANXA4	-0.115673	-0.176184	-0.0605111
NaN	-2.16884	NaN	-2.1379	NaN	NaN	-2.13277	-1.78739	-2.82276	-3.8297	NaN	-2.83244	NaN	NaN	NaN	0.623532	NaN	NaN	NaN	NaN	-2.06966	NaN	NaN	-2.26823	NaN	-0.903386	-2.76494	NaN	NaN	-0.0526309	-1.55682	NaN	NaN	NaN	NaN	NaN	-0.758547	-2.84786	NaN	-0.417189	NaN	2734	P52732	P52732	Kinesin-like protein KIF11	KIF11	KIF11	-2.16884	-1.2301	0.938731
0.55778	-0.0242367	1.26626	0.271534	-0.965851	0.195116	0.37486	1.93779	0.7693	2.05101	0.457431	0.852785	0.405082	1.41388	0.970108	1.49157	0.762872	0.132725	0.23401	0.263476	1.25548	0.841463	-0.155856	-0.0323906	1.32382	0.531846	0.488066	0.773427	0.342373	0.580048	1.16717	0.939136	-1.74589	1.05029	0.766073	0.820244	1.16174	0.235313	1.73947	0.329883	-1.65607	1420	P08133;P08133-2	P08133;P08133-2	Annexin A6	ANXA6	ANXA6	0.55778	0.67146	0.113681
1.04569	0.639363	1.03007	0.688625	1.1961	0.809125	1.14051	0.944312	1.13529	1.11749	0.474274	0.613302	0.793638	0.765097	1.18636	0.963182	0.970291	1.12245	1.352	1.26571	1.32607	1.42262	1.16484	1.08147	0.730836	1.10778	0.886783	1.17324	0.674473	0.801858	1.12828	0.218566	1.51835	1.94961	1.53044	1.1053	1.34569	1.23935	1.42452	1.11889	1.09897	1865	P20073-2;P20073	P20073-2;P20073	Annexin A7	ANXA7	ANXA7	0.944312	1.12537	0.181055
NaN	1.32775	-1.40132	0.01998	-0.109404	1.66921	0.230204	0.956396	1.59007	2.07523	0.294492	-0.659412	0.76765	1.18668	1.67883	1.01481	1.14965	1.06803	-1.17214	1.67979	0.971227	1.88185	1.3283	1.55768	0.432546	2.03397	-0.458533	NaN	0.460869	0.904867	1.37126	1.83996	0.96824	2.61082	1.45757	0.278868	1.67925	1.67946	2.26985	0.803888	1.08832	7533	Q9NW15;Q9NW15-2;Q9NW15-3;Q9NW15-5;Q9NW15-4	Q9NW15;Q9NW15-2;Q9NW15-3;Q9NW15-5;Q9NW15-4	Anoctamin-10	ANO10	ANO10	0.862023	1.14965	0.287631
-0.630395	-0.625851	0.496696	0.180975	-1.38539	0.174288	-1.02914	-0.286258	-0.787515	0.352007	0.0742861	0.642712	0.310885	0.465582	-0.433035	-0.694071	-1.17776	-0.999023	1.12102	-0.447227	-0.563047	0.35177	-0.469741	-1.01899	0.356057	-0.680965	-1.12668	-0.583781	-1.32082	-0.560697	-0.965513	-1.19027	-0.607762	-0.279318	-0.597265	-0.916923	0.184955	-0.0861653	-0.614618	-0.551087	-0.187236	4185	Q4KMQ2-3;Q4KMQ2;Q4KMQ2-2;Q4KMQ2-4	Q4KMQ2-3;Q4KMQ2;Q4KMQ2-2;Q4KMQ2-4	Anoctamin-6	ANO6	ANO6	0.0742861	-0.590523	-0.664809
1.92117	2.42807	0.314197	1.26688	NaN	-0.210587	2.55287	NaN	0.587625	1.21572	-0.210491	0.372922	0.322749	0.77616	1.99284	1.3258	1.73209	NaN	NaN	1.35248	0.285591	1.95471	0.538088	NaN	0.162474	0.372202	-0.614154	NaN	0.625591	0.885526	-1.58879	1.72585	1.0051	NaN	NaN	0.284963	1.30155	1.0232	0.351708	0.801917	0.536135	2902	P58335-4;P58335;P58335-2;P58335-3	P58335-4;P58335;P58335-2;P58335-3	Anthrax toxin receptor 2	ANTXR2	ANTXR2	0.77616	0.713754	-0.0624062
-2.33522	-1.41973	-3.04084	-3.38371	-2.30403	-2.50027	-0.317956	-1.3439	-0.566546	-1.29944	-2.38847	-3.11551	-2.7851	-3.01509	-2.28044	-1.77278	-1.5735	-3.66458	-2.58384	-1.49099	-1.99248	-1.4556	-3.738	-1.60157	-3.41092	-0.541801	-0.450163	-1.74821	-1.01118	-3.05333	-1.7451	-4.17858	-2.13018	-1.45262	-2.01786	-1.23256	-1.45238	-1.83419	-1.39955	-0.95595	-2.95339	2467	P46013	P46013	Antigen KI-67	MKI67	MKI67	-2.33522	-1.74666	0.588565
0.95386	1.8691	1.34879	2.33833	1.9831	1.59684	1.31651	1.26138	1.2184	1.75412	1.4259	0.568502	1.79945	1.1806	1.02617	1.20283	2.08838	1.25962	0.861197	1.36607	1.90555	1.66796	1.91949	2.4973	1.35865	2.39259	2.12446	2.21803	1.26152	1.49347	1.33823	1.23145	0.304204	1.41248	1.74456	1.39683	1.96646	2.38965	1.31916	1.23218	1.55551	3295	Q03518	Q03518	Antigen peptide transporter 1	TAP1	TAP1	1.34879	1.45298	0.104186
1.00992	1.81202	1.36419	2.42884	1.90033	1.03827	0.990143	1.20731	1.22541	1.75675	1.20667	0.560337	1.71191	1.07679	0.754828	1.36545	1.86794	1.20843	1.11065	1.28152	2.00738	1.73274	1.66217	2.7616	1.32789	2.44172	2.14986	1.99315	1.1982	1.57528	1.62346	1.09502	0.509144	1.20312	1.70266	1.73481	2.00427	2.17137	1.33587	1.11181	1.6358	3296	Q03519;Q03519-2	Q03519;Q03519-2	Antigen peptide transporter 2	TAP2	TAP2	1.20731	1.62963	0.422319
-0.158685	-0.343635	0.79861	0.774123	-0.251286	0.360933	0.795839	0.976458	-0.0245771	0.897804	0.620389	0.665891	0.396253	0.666045	0.294089	0.429546	-0.0344875	-0.293629	0.409397	-0.104598	0.255652	0.33977	-0.00101281	-0.367892	0.694196	0.564973	-0.165782	0.141314	-0.374409	0.569335	0.26499	0.533876	-0.274006	0.360231	0.0180557	-0.216094	0.763467	0.397223	0.252116	-0.228135	-0.322619	3413	Q10567-2;Q10567	Q10567-2;Q10567	AP-1 complex subunit beta-1	AP1B1	AP1B1	0.620389	0.196715	-0.423674
-0.63953	-0.304401	0.444489	0.27185	-0.570613	0.377329	0.117239	0.31559	-0.28989	0.363096	0.243954	0.210562	0.0785709	0.380349	0.0439211	0.0437593	-0.584018	-0.298966	0.510264	0.0522603	-0.162155	0.222836	-0.250716	-0.473183	0.321137	0.11079	-0.302824	-0.0149569	-0.445257	0.126219	-0.283936	-0.200376	-0.306222	0.256794	-0.128797	-0.476702	0.327779	0.0799947	0.10539	-0.339096	-0.417451	609	O43747;O43747-2	O43747;O43747-2	AP-1 complex subunit gamma-1	AP1G1	AP1G1	0.210562	-0.145476	-0.356038
-0.091251	-0.20262	1.57773	1.65573	1.04845	0.420559	2.5037	1.74928	1.31202	0.831575	1.28885	0.432421	0.718691	1.49936	1.53349	1.36391	0.590199	0.29709	0.119625	-0.0575795	1.01753	0.238689	0.988962	-0.106522	1.53089	1.91374	NaN	-0.0723641	0.45293	1.87469	1.81508	1.40689	-0.0179329	0.730463	0.161958	0.600727	1.79609	-0.0743477	1.06253	NaN	1.16672	899	O75843	O75843	AP-1 complex subunit gamma-like 2	AP1G2	AP1G2	1.28885	0.665595	-0.623259
-0.421263	-0.217061	0.62266	0.572416	-0.195102	0.447972	0.60579	0.61063	-0.0643192	0.624673	0.512221	0.546912	0.442532	0.564074	0.42562	0.268802	-0.201569	-0.0730862	0.624671	-0.00623296	0.000856099	0.296591	-0.100186	-0.37968	0.491322	0.518834	-0.238582	0.0197271	-0.264621	0.41305	0.0621861	0.236961	-0.259657	0.407268	0.0203953	-0.401518	0.526555	0.353005	0.248232	-0.296573	-0.166749	6795	Q9BXS5;Q9BXS5-2;Q9Y6Q5;Q9Y6Q5-2	Q9BXS5;Q9BXS5-2	AP-1 complex subunit mu-1	AP1M1	AP1M1	0.512221	0.0200612	-0.49216
-0.839889	-1.09518	-0.966733	-1.28822	-2.07766	0.0707233	-0.962637	-0.800512	-0.98103	-1.1562	-1.32598	-0.793606	-0.973813	-0.63307	-0.882472	-1.21573	-1.13096	-0.891683	0.0650358	-0.161216	NaN	-0.509217	-0.167633	-1.33916	-1.04449	-1.08602	-0.950135	-0.0227083	-0.601366	-0.724307	-0.91787	-1.9194	-0.133252	-0.603086	-0.438644	-1.25611	-1.15047	-0.745927	-0.874365	-0.38239	-0.546522	2987	P61966;P61966-2	P61966;P61966-2	AP-1 complex subunit sigma-1A	AP1S1	AP1S1	-0.966733	-0.745927	0.220806
-0.00655552	0.399708	1.17126	0.498068	0.412793	0.637528	1.02043	0.627065	0.554443	0.765796	3.33908	0.952711	1.3115	1.05483	1.19437	0.782058	0.0610615	0.055009	1.12233	0.186079	1.16216	0.710023	0.288018	0.0435718	0.9217	1.69932	0.269322	0.0687782	0.101549	1.06315	0.362604	0.740187	0.0783344	0.636101	0.570431	0.0589825	1.08568	1.42364	0.860323	-0.248332	-0.355461	2873	P56377;P56377-2	P56377;P56377-2	AP-1 complex subunit sigma-2	AP1S2	AP1S2	0.765796	0.466518	-0.299279
0.214357	-0.517323	0.648097	0.531987	-0.289795	-0.336376	0.295503	0.479504	-0.529528	0.440098	0.299399	0.253792	0.229905	0.495144	0.0820818	0.0898774	-0.538231	-0.508859	0.0967267	-0.265273	0.16194	0.244654	-0.347101	-0.409797	0.369656	0.137839	-0.373465	0.0792734	-0.579582	0.155563	-0.0927999	0.194399	-0.47439	0.688942	-0.326431	-0.37568	0.446816	0.215323	0.301286	-0.374137	-0.474946	1098	O95782-2;O95782	O95782-2;O95782	AP-2 complex subunit alpha-1	AP2A1	AP2A1	0.253792	-0.00676325	-0.260555
-0.214138	0.0776113	1.00835	0.765839	-0.188103	-0.456711	0.93656	0.94372	0.123528	0.956717	0.744715	0.750234	0.525231	0.841751	0.686259	0.433767	1.16889	-0.122331	0.145405	0.0780235	0.232507	0.571544	0.288144	0.273788	0.397526	0.560376	0.479058	0.332473	-0.208686	0.619641	0.943498	0.840492	-0.274126	0.563995	0.26828	0.369597	0.904874	0.585382	0.374561	-0.450772	-0.0642786	986	O94973	O94973	AP-2 complex subunit alpha-2	AP2A2	AP2A2	0.744715	0.372079	-0.372635
0.0465558	-0.283499	0.713321	0.392387	-0.24295	0.0634641	0.39288	0.190544	-0.288433	0.312717	0.332306	0.406655	0.272903	0.47149	0.377266	0.17124	-0.105671	-0.254154	0.27653	-0.0415573	-0.0497992	0.292277	-0.150665	-0.144023	0.267155	0.321416	-0.204266	0.0510124	-0.363045	0.308591	0.0826549	0.308658	-0.391147	0.556791	-0.205475	-0.213961	0.561743	0.255527	0.322751	-0.375236	-0.172865	3065	P63010;P63010-2;P63010-3	P63010;P63010-2;P63010-3	AP-2 complex subunit beta	AP2B1	AP2B1	0.312717	0.00472751	-0.307989
0.167746	-0.370808	0.858004	0.597299	-0.0829032	-0.325475	0.343381	0.417973	-0.120568	0.62681	0.438718	0.527742	0.401118	0.591129	0.192627	0.0374852	0.20336	-0.339607	0.106693	-0.110592	0.0551636	0.347658	-0.123686	-0.0974107	0.412218	0.304556	-0.0905816	0.382665	-0.418266	0.238938	0.177219	0.466482	-0.335948	0.796053	-0.0882037	-0.173724	0.589734	0.388261	0.301627	-0.301583	-0.132439	6050	Q96CW1-2;Q96CW1	Q96CW1-2;Q96CW1	AP-2 complex subunit mu	AP2M1	AP2M1	0.401118	0.0809282	-0.32019
0.0570892	-0.580881	0.542082	0.470713	-0.433196	-0.341654	0.321912	0.415873	-0.484684	0.363905	0.222383	0.254877	0.110298	0.483215	0.0493785	0.0788399	-0.201973	-0.67569	-0.221884	-0.373705	0.0311223	0.200319	-0.508209	-0.422635	0.137221	0.00784797	-0.384916	-0.0211949	-0.770513	0.151979	0.0205178	0.0610764	-0.74702	0.602597	-0.33694	-0.426301	0.253307	-0.104207	0.281219	-0.54464	-0.539864	2775	P53680;P53680-2	P53680;P53680-2	AP-2 complex subunit sigma	AP2S1	AP2S1	0.222383	-0.15309	-0.375473
-0.358173	-0.10732	0.728125	0.451379	-0.218551	0.0800919	0.38948	0.457043	-0.247986	0.598476	0.494474	0.436612	0.150009	0.43084	0.307976	0.0892348	-0.384074	-0.323451	0.100708	0.0903777	0.0357627	0.461907	-0.369538	-0.427539	0.31321	0.456941	-0.560807	-0.191758	-0.234543	0.349838	-0.225741	0.165662	-0.202157	0.466707	-0.116615	-0.271197	0.642922	0.423217	0.0324578	0.0502972	-0.190477	249	O00203-3;O00203	O00203-3;O00203	AP-3 complex subunit beta-1	AP3B1	AP3B1	0.38948	0.0341103	-0.35537
-0.210172	-0.125328	0.772981	0.423197	-0.122721	0.145817	0.292887	0.468527	-0.189202	0.639481	0.392603	0.350859	0.176403	0.525194	0.321181	0.127801	-0.426351	-0.253334	0.112241	-0.0258123	-0.0464561	0.459861	-0.150354	-0.333982	0.333515	0.444096	-0.433899	-0.309041	-0.262199	0.402898	-0.339772	0.211611	-0.236541	0.469741	-0.00787405	-0.30063	0.527346	0.502852	0.00037619	0.155652	-0.163607	347	O14617-5;O14617;O14617-4;O14617-2;O14617-3	O14617-5;O14617;O14617-4;O14617-2;O14617-3	AP-3 complex subunit delta-1	AP3D1	AP3D1	0.321181	-0.0168432	-0.338024
-0.359563	-0.0221311	0.743492	0.512352	-0.0789866	0.161142	0.521778	0.510213	-0.225552	0.736734	0.478731	0.425901	0.475812	0.487119	0.273331	0.0563089	-0.514833	-0.300212	0.0972173	-0.0922627	-0.11944	0.371608	-0.523672	-0.323541	0.32045	0.354829	-0.493129	-0.25643	-0.474038	0.453478	-0.299958	0.069138	-0.273406	0.0736706	-0.0997554	-0.368508	0.526396	0.403539	-0.104862	0.0755568	-0.0754898	8208	Q9Y2T2	Q9Y2T2	AP-3 complex subunit mu-1	AP3M1	AP3M1	0.475812	-0.0960091	-0.571821
-0.274964	-0.102921	0.569089	0.362407	-0.188551	0.497322	0.413545	0.374825	-0.0613462	0.461952	-0.366161	0.425993	0.142021	0.474504	0.577752	0.131298	-0.160478	-0.16637	0.106023	0.158715	-0.0973283	0.441181	-0.474666	-0.566718	0.264601	0.557317	-0.86211	-0.354778	-0.319867	0.442104	-0.357316	0.314949	-0.168016	0.350269	0.131438	-0.252036	0.604236	0.347881	0.0375444	0.291347	-0.408675	5798	Q92572	Q92572	AP-3 complex subunit sigma-1	AP3S1	AP3S1	0.374825	0.0717836	-0.303042
0.407019	NaN	0.401273	NaN	-0.32218	NaN	0.57211	0.620672	0.136685	1.4105	NaN	NaN	-0.161125	0.199337	NaN	0.560176	-0.60297	1.31272	0.701215	-0.161564	-0.157485	0.70307	-0.986754	-0.107078	NaN	NaN	-0.229384	NaN	0.269173	0.61879	0.648352	NaN	-0.490746	0.482039	-0.384058	NaN	NaN	0.722252	-0.134569	NaN	-0.460466	8422	Q9Y6B7;Q9Y6B7-2	Q9Y6B7	AP-4 complex subunit beta-1	AP4B1	AP4B1	0.401273	-0.107078	-0.508352
NaN	0.332613	0.416029	0.993541	0.846003	1.68757	0.718079	0.868116	0.935238	0.760721	0.851094	NaN	NaN	0.424931	0.531015	1.37757	NaN	0.967924	NaN	-0.0857657	NaN	NaN	1.11833	NaN	0.489223	NaN	0.294669	NaN	NaN	0.979159	1.65959	NaN	NaN	0.178808	NaN	NaN	NaN	0.500044	0.529079	NaN	1.10489	8351	Q9Y587	Q9Y587	AP-4 complex subunit sigma-1	AP4S1	AP4S1	0.803362	0.748501	-0.0548607
NaN	0.674481	1.03745	0.928602	0.798362	0.0390482	1.02253	1.16757	0.690274	1.11116	0.844543	0.810838	0.786172	0.945819	1.28007	0.709157	0.298259	-0.202236	0.0015005	0.668544	1.12347	NaN	-0.437405	0.535651	0.709451	1.29676	-0.407434	-0.021673	0.915674	0.789517	0.82412	NaN	0.456682	1.09741	0.588669	0.401218	0.973994	0.968321	0.771751	0.304271	0.645396	4127	Q2VPB7	Q2VPB7	AP-5 complex subunit beta-1	AP5B1	AP5B1	0.886573	0.65697	-0.229602
NaN	NaN	NaN	NaN	0.817914	NaN	0.902263	0.918284	NaN	0.899501	0.00652132	NaN	NaN	0.748432	NaN	NaN	0.462815	NaN	NaN	0.894446	NaN	NaN	NaN	NaN	NaN	NaN	0.194825	NaN	NaN	NaN	NaN	NaN	0.993449	NaN	NaN	NaN	0.548307	1.24663	NaN	NaN	NaN	7480	Q9NUS5	Q9NUS5	AP-5 complex subunit sigma-1	AP5S1	AP5S1	0.858707	0.721377	-0.13733
0.404033	0.477199	0.79639	0.683865	0.811457	NaN	0.270877	0.718852	0.646843	1.00608	0.206787	-0.444369	0.755781	0.312329	0.455168	0.117034	0.395416	0.385471	0.696499	0.733631	1.43393	0.761525	0.834081	0.595379	0.474755	NaN	0.00649431	0.6961	0.868348	0.709589	0.498115	0.559473	NaN	0.910052	0.265754	0.612609	0.920213	0.511774	NaN	0.303466	0.650837	534	O43299;O43299-2;O43299-3	O43299;O43299-2	AP-5 complex subunit zeta-1	AP5Z1	AP5Z1	0.562021	0.612609	0.0505877
-0.503896	-0.597575	-1.6972	-1.58763	-0.250426	-1.22369	-1.74915	-1.4187	-0.164972	-0.837127	-1.65798	-1.84276	-1.48161	-1.71026	-1.0651	-0.995276	-0.336232	-0.479885	-0.488385	0.171853	-0.657674	-0.262081	-0.181351	-0.246522	-1.65966	-1.05649	-0.151346	-0.0359896	-0.161355	-1.62511	-0.713424	-1.22609	-0.0767036	-0.669802	0.0741407	-0.102052	-0.751933	-0.535201	-0.970747	-0.0593782	-0.485777	6168	Q96GQ7	Q96GQ7	Probable ATP-dependent RNA helicase DDX27	DDX27	DDX27	-1.4187	-0.482831	0.935867
4.58494	0.663579	0.0430285	0.964011	3.96738	2.69788	-1.30121	-0.851406	0.735147	1.72942	1.17243	-1.49687	0.108702	-1.35002	-0.808249	0.280714	3.69535	-0.0559975	0.254558	0.8336	3.71139	3.22299	-1.58447	2.3282	0.569916	0.600244	1.00051	2.27959	-2.558	-3.45788	-0.966391	-4.1055	2.98217	2.91425	2.05978	1.27636	-1.87218	1.28774	1.24458	1.1347	-1.45583	1277	P04114	P04114	Apolipoprotein B-100;Apolipoprotein B-48	APOB	APOB	0.663579	0.917057	0.253478
1.66611	1.72748	1.73805	1.65303	1.69293	NaN	NaN	1.75328	3.77096	0.826111	NaN	0.717384	0.950247	1.49705	0.338669	1.69763	2.278	NaN	NaN	2.20546	2.42319	2.19971	3.63959	1.63933	1.30966	3.45121	NaN	2.30706	1.80153	1.93046	0.819919	2.73957	NaN	1.55796	2.02935	NaN	NaN	1.83406	NaN	NaN	NaN	6574	Q9BQE5	Q9BQE5	Apolipoprotein L2	APOL2	APOL2	1.65957	2.02935	0.369783
7.00419	4.94182	NaN	3.77912	4.68434	4.8604	NaN	4.66396	NaN	NaN	NaN	0.0816845	NaN	NaN	NaN	NaN	NaN	6.0198	NaN	NaN	NaN	3.90405	4.21902	1.17611	NaN	2.7922	5.54953	4.06806	4.01557	0.725716	NaN	2.6501	NaN	3.20268	NaN	NaN	NaN	NaN	NaN	4.45589	NaN	1055	O95445-2;O95445	O95445-2;O95445	Apolipoprotein M	APOM	APOM	4.68434	3.95981	-0.724523
0.730866	0.550695	0.612829	-0.137934	1.41623	0.686944	0.399302	-0.113851	1.73295	1.19552	0.188262	0.0800585	0.194811	0.105928	0.599624	0.406514	1.44397	0.575832	0.976014	1.44114	0.664765	0.637415	0.949668	0.55283	0.137055	0.794884	0.545646	0.93764	1.09259	0.348022	0.928844	0.251945	1.00967	0.607376	0.832121	1.51468	1.11761	1.10072	NaN	1.01403	1.21879	6703	Q9BUR5;Q9BUR5-2	Q9BUR5;Q9BUR5-2	Apolipoprotein O	APOO	APOO	0.550695	0.928844	0.378149
0.788401	0.92225	0.0797524	0.138084	0.395893	-0.0835573	0.242037	0.116781	0.557592	0.344726	0.199361	-0.0295354	0.117564	0.054955	0.295526	0.27569	0.476316	0.544384	0.202552	0.54323	0.258657	0.272025	0.352229	0.668563	0.0592544	0.686832	0.780848	0.507553	0.735528	0.169204	0.304215	0.0214194	0.616545	0.00099736	0.600066	0.611231	0.437898	0.721945	0.157573	0.675855	0.445465	6867	Q9BZZ5-2;Q9BZZ5-5	Q9BZZ5-2;Q9BZZ5-5	Apoptosis inhibitor 5	API5	API5	0.199361	0.46089	0.26153
0.146197	0.18088	0.0445374	0.692011	0.527901	0.497282	1.33348	0.708622	-0.118477	-0.0130625	1.01796	0.622872	0.505144	0.688375	0.306386	0.467858	0.157537	0.0222156	0.179713	-0.102666	0.58889	-0.214861	0.455048	0.0929848	0.420659	0.226688	0.0311302	-0.186995	0.589262	1.25013	0.337432	0.913778	0.474987	-0.297439	0.265236	-0.0758355	0.11888	0.395527	0.279896	0.0598031	0.389299	3357	Q07812-8;Q07812;Q07812-2;Q07812-5;Q07812-7;Q07812-4;Q07812-6;Q07812-3	Q07812-8;Q07812;Q07812-2;Q07812-5;Q07812-7	Apoptosis regulator BAX	BAX	BAX	0.505144	0.245962	-0.259182
3.17019	1.02152	1.27489	0.780781	3.06651	1.08619	0.805811	0.504032	1.61538	1.03044	0.630613	0.67254	1.4823	1.29263	1.87943	0.899879	1.82183	1.4147	2.24461	2.48472	1.91181	2.33946	2.53996	1.27881	0.907767	1.4149	1.18319	2.05118	2.4126	0.915366	1.398	1.18633	2.67532	2.18875	2.06983	1.66999	2.16346	1.99028	2.61435	2.10138	2.25449	1951	P22830;P22830-2	P22830;P22830-2	Ferrochelatase, mitochondrial	FECH	FECH	1.08619	2.02073	0.934533
-0.720305	-0.766056	-0.75534	0.971552	-0.207239	-0.0929704	1.59866	0.931132	-1.42657	-1.21033	1.03235	1.04026	0.654419	0.671026	-0.0361893	0.293215	-0.71294	0.0356897	-0.637844	-1.65795	0.543277	-1.98208	-0.209324	0.279291	1.12873	-0.243609	0.411844	-1.77726	-1.29619	1.08315	-0.0330852	1.47131	-0.766085	-1.94719	-0.816822	-0.760999	-0.627032	-0.783032	-0.599865	-2.12683	0.415614	8038	Q9ULZ3-2;Q9ULZ3;Q9ULZ3-3	Q9ULZ3-2;Q9ULZ3;Q9ULZ3-3	Apoptosis-associated speck-like protein containing a CARD	PYCARD	PYCARD	-0.0361893	-0.613449	-0.577259
-0.180018	0.0512557	0.10286	-0.134676	0.282413	-0.0149676	-0.313825	-0.226675	0.195765	0.293476	-0.255618	-0.156327	-0.126407	0.121082	0.0654438	-0.156229	0.158948	-0.229694	0.204833	1.05864	0.0949156	0.555482	0.1678	-0.090081	-0.26057	0.146022	-0.283802	0.440288	0.560945	-0.135456	-0.092818	0.0607782	0.683734	0.251295	0.418107	0.232578	0.419693	0.390314	-0.0875125	0.326006	0.45402	1112	O95831;O95831-3;O95831-2;O95831-5;O95831-4;O95831-6	O95831;O95831-3;O95831-2	Apoptosis-inducing factor 1, mitochondrial	AIFM1	AIFM1	-0.0149676	0.186317	0.201284
0.201186	0.422026	-0.0585513	-0.209827	0.125444	-0.490771	0.240611	-0.119022	0.202426	0.317492	-0.0337861	-0.102946	-0.305466	-0.198239	0.122862	-0.137564	0.111969	0.173128	-0.157778	0.342552	0.20996	0.329257	-0.208125	0.370267	-0.233735	0.263106	0.487835	0.59812	0.542443	-0.246104	0.0876648	-0.207013	0.391268	0.0899979	0.445472	0.317618	0.240833	0.170517	0.0118402	0.619515	-0.148103	7985	Q9UKV3;Q9UKV3-3;Q9UKV3-2;REV__P30679;P46937-4;P46937-5;P46937-3;P46937-6;P46937-7;P46937-2;P46937-8;P46937;P46937-9	Q9UKV3	Apoptotic chromatin condensation inducer in the nucleus	ACIN1	ACIN1	-0.0337861	0.191544	0.22533
-0.265986	0.277474	0.886015	1.19902	0.349729	0.156173	1.0434	1.37101	0.102405	0.784213	1.2721	1.26157	1.40185	1.34484	0.836773	1.22327	0.670872	0.316486	0.324809	-0.576463	0.782797	-0.570107	0.0547259	0.155954	1.2929	0.958786	0.608814	-1.58574	-0.935428	0.827671	1.06061	0.668839	-0.198605	0.475219	-0.179767	0.858661	0.79227	0.873293	1.18032	-1.09354	0.521405	364	O14727-4;O14727;O14727-3;O14727-2;O14727-5;O14727-6	O14727-4;O14727;O14727-3;O14727-2;O14727-5	Apoptotic protease-activating factor 1	APAF1	APAF1	0.886015	0.565109	-0.320906
NaN	0.277493	NaN	0.0494629	0.953059	NaN	NaN	0.196843	0.896694	1.05899	0.0484437	0.23865	0.165338	NaN	0.589183	-0.017291	1.07536	NaN	0.0231549	1.32292	0.20629	NaN	0.630901	0.640856	0.311814	1.09756	0.338	NaN	1.21206	0.0458241	0.518855	NaN	1.16886	0.452433	1.21082	0.848571	0.813132	0.914838	0.266208	1.01929	0.600302	4842	Q7Z2E3-7;Q7Z2E3;Q7Z2E3-5;Q7Z2E3-10;Q7Z2E3-8;Q7Z2E3-4;Q7Z2E3-9;Q7Z2E3-11;Q7Z2E3-3;Q7Z2E3-13;Q7Z2E3-2;Q7Z2E3-6;Q7Z2E3-12	Q7Z2E3-7;Q7Z2E3;Q7Z2E3-5;Q7Z2E3-10;Q7Z2E3-8;Q7Z2E3-4;Q7Z2E3-9;Q7Z2E3-11;Q7Z2E3-3;Q7Z2E3-13	Aprataxin	APTX	APTX	0.258071	0.635879	0.377807
0.578843	2.29781	1.91497	0.288384	1.06601	NaN	1.2755	2.69949	2.49243	2.97258	2.50329	1.72009	2.40113	1.76157	2.64653	0.368734	3.59117	NaN	1.7954	1.49031	3.66902	3.3644	NaN	NaN	1.81265	4.4212	1.5011	NaN	0.381876	3.32008	3.51628	1.40755	NaN	2.91468	1.70341	2.71023	3.0609	2.38835	2.03448	NaN	-0.140367	1501	P09917;P09917-2;P09917-3;P09917-5;P09917-4	P09917;P09917-2;P09917-3;P09917-5;P09917-4	Arachidonate 5-lipoxygenase	ALOX5	ALOX5	2.10639	2.21141	0.10502
NaN	1.40088	2.31212	1.7425	-0.733539	0.804558	1.67879	2.45316	-0.660979	2.19415	1.52586	1.23515	1.06255	1.65635	1.736	0.411579	0.429766	1.77683	NaN	NaN	NaN	1.85081	NaN	1.03014	0.656092	1.25327	-0.883162	-0.381202	NaN	1.54975	1.15906	0.211734	NaN	3.23635	1.06648	0.492568	2.54063	1.17684	2.30343	0.756637	-1.47872	1874	P20292	P20292	Arachidonate 5-lipoxygenase-activating protein	ALOX5AP	ALOX5AP	1.5911	1.04831	-0.542796
-0.0105189	0.386219	0.770833	0.486409	0.315646	1.15502	0.828559	0.946239	0.991934	0.723101	0.319852	0.535632	0.730329	0.41943	0.442533	1.32022	0.804339	0.557991	1.19495	-0.179848	0.177869	-0.0537239	0.862812	0.10588	0.778751	-0.0868475	0.7084	-0.326102	-0.322182	0.362302	1.34928	0.608564	0.408514	-0.516676	0.239564	0.29856	-0.0576052	0.115094	0.521947	-0.396429	0.539337	8219	Q9Y2X7;Q9Y2X7-3;Q9Y2X7-2	Q9Y2X7;Q9Y2X7-3	ARF GTPase-activating protein GIT1	GIT1	GIT1	0.535632	0.330431	-0.205201
0.271226	-0.169595	0.927411	0.872104	0.487388	0.336762	0.607484	1.0367	0.340111	0.625297	0.862929	0.706782	0.849737	0.81027	0.979869	1.31716	0.628173	0.545275	0.686169	-0.31629	0.935603	-0.045363	0.8409	-0.131069	0.789409	0.424026	0.589727	-0.675965	-0.180079	0.752156	1.31469	0.671437	-0.256501	0.17134	0.201792	0.576694	0.289638	0.40981	0.527712	-0.43229	0.578534	3705	Q14161;Q14161-5;Q14161-3;Q14161-7;Q14161-6;Q14161-11;Q14161-8;Q14161-4;Q14161-9;Q14161-10;Q14161-2	Q14161;Q14161-5;Q14161-3;Q14161-7;Q14161-6;Q14161-11;Q14161-8;Q14161-4;Q14161-9;Q14161-10;Q14161-2	ARF GTPase-activating protein GIT2	GIT2	GIT2	0.706782	0.536494	-0.170288
-0.778514	-1.01859	-2.04234	-2.01347	-0.586883	-1.16772	-1.46405	-1.56461	-0.094554	-0.868664	-1.65031	-2.07484	-1.63399	-2.01793	-1.15124	-0.997623	-0.443625	-0.692359	-0.865432	-0.0267842	-0.793354	-0.502739	-0.467463	-0.421761	-1.65719	-0.829334	-0.205131	-0.0094858	-0.11411	-1.81971	-0.506143	-1.7733	-0.232586	-0.589069	-0.0455929	-0.180869	-0.834011	-0.556463	-1.02337	-0.2654	-1.06584	6958	Q9H0S4;Q9H0S4-2	Q9H0S4;Q9H0S4-2	Probable ATP-dependent RNA helicase DDX47	DDX47	DDX47	-1.46405	-0.531303	0.932749
NaN	-1.32709	NaN	NaN	-1.37154	NaN	NaN	-0.824838	-1.30462	-1.55322	-0.870395	0.293821	NaN	-1.11814	-0.691767	-1.52009	NaN	NaN	NaN	-0.329575	-0.48344	NaN	-0.82657	-1.15255	-2.31574	-0.714811	-1.40583	NaN	-1.28457	-0.672241	NaN	-0.559559	-0.895711	NaN	NaN	-0.968219	-1.03756	-0.67093	NaN	NaN	-0.913706	2756	P53365-2;P53365-3;P53365	P53365-2;P53365-3;P53365	Arfaptin-2	ARFIP2	ARFIP2	-1.11814	-0.904709	0.213427
-0.867348	-0.843958	-2.1847	-1.67087	-0.24122	-1.25369	-2.09498	-1.49656	-0.162292	-0.993119	-2.03491	-2.01561	-1.5036	-2.12421	-1.11809	-1.15776	-0.517211	-0.969661	-0.56178	0.0271158	-0.60098	-0.368441	-0.170985	-0.57413	-1.91098	-1.29799	-0.530024	-0.0333162	0.0529539	-1.65171	-0.632605	-1.4182	-0.213761	-0.793762	0.126225	-0.239218	-0.996654	-0.741401	-1.02675	-0.107981	-0.587683	3786	Q14690	Q14690	Protein RRP5 homolog	PDCD11	PDCD11	-1.49656	-0.580906	0.915651
2.46051	0.623093	1.17028	1.0951	1.46626	1.9606	2.65475	1.44623	1.18621	1.1867	1.53681	1.74925	2.02291	1.42777	2.89725	2.5769	2.56786	2.36525	1.93741	0.365583	2.3481	NaN	2.8425	0.832668	1.77081	1.40751	1.90458	0.346713	0.878256	1.54271	0.882248	0.915674	1.6575	1.74958	0.80674	0.727065	1.01337	-0.12603	2.17396	-0.106785	1.75509	3852	Q15027	Q15027	Arf-GAP with coiled-coil, ANK repeat and PH domain-containing protein 1	ACAP1	ACAP1	1.46626	1.54271	0.0764545
0.0221898	-0.218116	0.758261	1.21964	-0.0293882	0.348223	0.860898	1.10557	-0.451091	0.891925	1.16994	0.857583	0.743444	0.864145	0.395728	0.948189	0.321485	0.318511	-0.0733492	-0.815097	0.891419	-0.52627	0.0745707	0.140893	1.08012	0.515744	0.419646	-0.543977	-0.741096	0.836024	0.557578	0.37404	-0.106334	0.431982	-0.119672	0.293183	-0.0722101	0.190107	1.08546	NaN	0.444969	3868	Q15057;Q96P50-4	Q15057	Arf-GAP with coiled-coil, ANK repeat and PH domain-containing protein 2	ACAP2	ACAP2	0.758261	0.318511	-0.43975
NaN	-0.399203	0.549456	1.07646	-0.227018	NaN	0.89394	NaN	-0.809411	0.206205	1.15647	0.855944	0.867399	0.817791	-0.377552	0.256095	-0.747771	NaN	NaN	NaN	-0.902193	-0.768271	-1.63925	-0.00636552	0.792291	0.857446	0.0180281	-0.753623	NaN	1.33246	-0.620057	0.656175	NaN	-0.932703	NaN	0.0116841	0.573876	0.356334	NaN	NaN	-0.295662	878	O75689-3;O75689;O75689-2	O75689-3;O75689;O75689-2	Arf-GAP with dual PH domain-containing protein 1	ADAP1	ADAP1	0.683623	0.00265928	-0.680964
1.01144	-0.321759	0.925258	0.735323	0.408103	NaN	0.911151	1.26025	0.218653	0.664626	NaN	0.745583	0.679617	0.77718	0.542091	0.808724	0.5948	0.673179	0.409376	0.0508647	-0.42504	NaN	-0.248088	NaN	0.988392	0.0719186	NaN	NaN	0.278252	0.764515	0.538399	0.179093	0.276692	1.14409	0.271804	0.43285	0.260208	0.549914	1.09262	NaN	0.533106	7302	Q9NPF8-2;Q9NPF8	Q9NPF8-2;Q9NPF8	Arf-GAP with dual PH domain-containing protein 2	ADAP2	ADAP2	0.735323	0.43285	-0.302473
-0.191479	NaN	-0.0184495	0.187298	0.384416	2.06422	0.371564	NaN	0.290506	-0.492633	NaN	0.32626	-0.0717603	0.623426	1.21683	1.2444	1.16942	0.505014	1.1141	-0.079298	0.721033	NaN	1.67522	0.25316	-0.0400183	0.188972	0.503806	NaN	1.05364	0.595213	0.592384	NaN	0.898646	-0.0824084	-0.276944	0.0166223	-0.148963	-0.148364	0.623424	NaN	0.554215	6454	Q99490-2;Q99490	Q99490-2;Q99490	Arf-GAP with GTPase, ANK repeat and PH domain-containing protein 2	AGAP2	AGAP2	0.308383	0.529615	0.221231
-0.180802	-0.321178	-2.04223	-2.0242	-0.211509	-1.24548	-1.73395	-1.71094	0.0865138	-1.1559	-1.72199	-1.57746	-1.38734	-2.20316	-0.942062	-0.905916	-0.187232	-0.539798	-0.440396	0.221435	-0.534794	-0.265695	-0.50574	-0.160191	-2.3738	-0.776291	0.159343	0.495577	0.696004	-1.47324	-0.777851	-2.38421	0.381585	-0.953462	-0.0605787	-0.0704271	-1.04639	-0.375913	-0.689359	0.0753668	-0.634268	1131	O95983-2;O95983	O95983-2;O95983	Methyl-CpG-binding domain protein 3	MBD3	MBD3	-1.38734	-0.473068	0.914274
1.05692	0.0192044	1.29749	1.32482	0.493495	1.41483	1.34628	1.55783	-0.337234	1.67964	1.3533	1.30693	1.62401	1.22629	1.14433	1.03428	0.288674	NaN	1.65575	-0.783268	1.63424	1.52907	0.940444	NaN	1.43997	0.189036	0.619783	0.0692759	-0.285081	0.824446	0.583916	1.74425	-0.00722632	1.19535	NaN	0.612662	0.431515	0.711756	2.60721	NaN	0.713757	8014	Q9ULH1;Q9ULH1-2	Q9ULH1;Q9ULH1-2	Arf-GAP with SH3 domain, ANK repeat and PH domain-containing protein 1	ASAP1	ASAP1	1.30693	0.712756	-0.594178
0.60953	0.680965	-0.028983	-0.0351252	0.61907	-0.414109	-0.0772466	0.0875396	0.583905	0.147553	-0.188528	0.490262	-0.327332	-0.0448828	0.0760039	0.0564576	0.517205	0.41623	-0.134069	0.600947	0.315147	0.475274	-0.0351898	0.526027	-0.668034	0.538531	0.831983	0.849338	0.724123	-0.0343314	0.363133	-0.370529	0.577137	NaN	0.836399	0.720357	0.476491	0.379937	0.380418	0.808322	-0.0135435	7540	Q9NWB6;Q9NWB6-2;Q9NWB6-3	Q9NWB6;Q9NWB6-2;Q9NWB6-3	Arginine and glutamate-rich protein 1	ARGLU1	ARGLU1	0.0760039	0.475274	0.39927
0.290635	0.307654	-0.246351	-0.464325	0.15733	-0.671105	-0.229392	-0.0426127	0.360612	0.373636	-0.247268	-0.557386	-0.434736	-0.742301	-0.0883296	-0.102436	0.222936	0.057706	-0.157104	0.489207	-0.334241	0.147353	-0.140043	0.332216	-0.581381	0.457189	0.446608	0.501227	0.69708	-0.12094	0.118102	-0.761834	0.260537	-0.235067	0.400876	0.532538	0.156933	0.213887	-0.365924	0.833475	-0.220782	4810	Q7L4I2;Q7L4I2-2	Q7L4I2;Q7L4I2-2	Arginine/serine-rich coiled-coil protein 2	RSRC2	RSRC2	-0.229392	0.152143	0.381535
-0.850984	-1.0865	-0.207963	-0.265155	-1.00074	-0.450144	-0.376371	-0.258977	-1.01509	-0.523785	-0.433293	-0.37387	-0.430629	-0.359325	-0.587192	-0.236132	-0.793234	-0.525376	-0.551411	-0.779766	-0.774267	-0.658057	-0.840642	-1.02286	-0.243722	-0.702579	-1.01376	-1.13747	-1.01956	-0.438596	-0.589922	-0.499046	-0.977877	-0.512179	-0.846971	-0.959589	-0.72038	-0.58371	-0.601667	-0.952916	-0.810519	2793	P54136;P54136-2	P54136;P54136-2	Arginine--tRNA ligase, cytoplasmic	RARS	RARS	-0.433293	-0.747323	-0.314031
NaN	1.70435	0.936638	1.42904	0.25347	1.85657	2.44261	1.63664	NaN	1.04534	1.73943	1.24074	1.51154	1.18425	1.56407	1.45656	-0.0652246	1.69256	0.888943	NaN	0.838911	NaN	1.32316	0.898082	1.05351	NaN	NaN	NaN	NaN	1.54721	NaN	1.32685	NaN	NaN	NaN	NaN	NaN	NaN	NaN	NaN	0.395019	1296	P04424;P04424-3;P04424-2	P04424;P04424-3;P04424-2	Argininosuccinate lyase	ASL	ASL	1.51154	1.05351	-0.458024
-4.11141	-3.7355	-4.076	-4.43215	-8.03807	-4.46023	-5.22114	-4.85472	-7.52254	-4.12187	-4.8103	-4.50994	-4.78571	-4.67989	-4.30582	-5.78713	-5.06132	-3.80143	-6.66206	-4.0403	-5.88268	-3.32106	-7.96303	-4.9616	-4.00406	-5.06851	-4.67896	-3.81235	-4.54103	-7.61308	-6.91997	-5.26455	-4.73115	-3.43354	-4.82982	-5.99583	-4.64431	-6.56901	-2.82062	-1.84745	-6.77355	1178	P00966	P00966	Argininosuccinate synthase	ASS1	ASS1	-4.50994	-4.89571	-0.385767
0.393776	0.550673	0.606722	0.459473	0.46027	1.20734	0.943547	0.606938	-0.429496	0.467092	0.648245	0.955977	0.716436	0.568362	0.592614	0.955214	0.754966	1.92326	2.12384	-0.526051	0.880326	-0.224818	0.341575	0.117785	1.08948	1.32276	1.35979	NaN	0.227035	1.1313	0.48991	0.959438	0.0829618	1.15657	-0.0631465	0.239207	0.394126	0.286825	0.733502	NaN	1.41991	1022	O95260-2;O95260	O95260-2;O95260	Arginyl-tRNA--protein transferase 1	ATE1	ATE1	0.592614	0.744234	0.151619
-0.690228	-0.691325	-0.389737	-0.591207	-0.115592	-0.33226	-1.02148	-0.392804	-0.387461	-0.0352154	-0.574736	-0.287202	-0.631264	-0.326644	-0.110457	-0.229056	0.278899	-0.72136	-0.171911	-0.0291287	-0.0718639	-0.272808	-0.139777	-0.568673	-0.579891	-0.374148	-0.479089	0.00807534	0.155995	-0.377874	-0.556477	-0.476275	0.105147	-0.398908	-0.16008	-0.11714	-0.379905	-0.339934	-0.449252	-0.388809	-0.647306	7521	Q9NVT9;Q9NVT9-2	Q9NVT9	Armadillo repeat-containing protein 1	ARMC1	ARMC1	-0.389737	-0.357041	0.0326961
-0.973357	-0.847289	-1.79929	-1.74569	-0.311321	-1.04126	-1.78277	-1.53544	-0.267747	-1.27795	-2.53247	-1.91108	-1.41943	-1.37132	-1.27067	-0.810652	-0.479226	-0.472021	-0.839675	0.235014	-0.389873	-0.354617	0.278418	-0.459136	-1.03289	-1.00378	-0.365338	0.0808813	-0.0619623	-1.96789	-0.364005	-1.34861	-0.0528072	-0.852717	0.426179	-0.128571	-0.686107	-0.76371	-1.17856	-0.107918	-0.55373	7610	Q9NY61	Q9NY61	Protein AATF	AATF	AATF	-1.37132	-0.465578	0.905739
-1.3897	-1.75634	-2.26761	-0.772178	-1.30947	-0.656522	-0.845047	-1.37489	-1.80696	-1.94733	-0.854131	-0.734823	-0.971901	-1.51026	-1.49055	-1.01772	-1.29475	-1.00964	-0.736452	-0.935249	-1.48969	0.473859	-0.386988	NaN	-1.04472	NaN	-1.43738	0.638495	-1.10514	-1.18397	-0.910973	-0.865407	-1.82205	-0.579005	-1.73642	-1.33065	-1.91699	-1.82244	-0.556555	-0.411379	-0.903686	4549	Q6NXE6-2;Q6NXE6	Q6NXE6-2;Q6NXE6	Armadillo repeat-containing protein 6	ARMC6	ARMC6	-1.37489	-1.01368	0.361209
0.291655	0.385352	0.367086	0.314889	0.209471	0.606711	0.110528	0.494124	0.610102	0.459453	0.0552014	0.0961286	0.230952	0.112795	0.352876	0.36573	0.249098	0.885757	0.232509	0.327825	0.199101	0.55438	0.266194	0.435546	0.164844	0.672182	0.153693	0.350647	-0.00497221	0.0839828	0.0409379	0.208691	0.0694686	0.517677	0.180798	0.297	0.063044	0.409094	0.408988	0.222332	0.303963	5083	Q8IUR7;Q8IUR7-7;Q8IUR7-2;Q8IUR7-3;Q8IUR7-8;Q8IUR7-6	Q8IUR7;Q8IUR7-7;Q8IUR7-2;Q8IUR7-3;Q8IUR7-8;Q8IUR7-6	Armadillo repeat-containing protein 8	ARMC8	ARMC8	0.314889	0.257646	-0.0572427
-0.316795	0.661123	0.428072	0.0329273	0.525658	0.408662	0.167272	0.282875	0.25137	0.791349	0.272817	0.18818	0.255016	0.440121	0.333827	-0.355972	-0.0704536	0.00534604	0.406816	1.17912	-0.184449	0.533674	0.44063	-0.124694	-0.0750779	0.72187	-0.0925923	-0.233808	0.0597015	0.489771	0.0566954	0.129083	-0.611287	-0.0317889	0.318007	-0.13508	0.791677	1.0122	-0.545369	0.697655	0.744373	7848	Q9UH62	Q9UH62	Armadillo repeat-containing X-linked protein 3	ARMCX3	ARMCX3	0.282875	0.0581985	-0.224677
-0.675799	-0.675954	-0.36168	0.552474	-0.265838	-1.42584	NaN	-0.264531	-1.1156	NaN	0.0566616	0.0910972	0.151877	0.319488	0.0228544	-0.146123	-0.167248	NaN	-0.213041	-0.00299728	-0.205863	NaN	-0.137549	-0.227139	0.212542	NaN	-0.0473967	NaN	-0.784549	0.380201	0.325717	-0.179451	-0.440523	NaN	NaN	-0.761592	-0.35134	-0.524026	-0.15964	NaN	0.110067	5324	Q8N5I2	Q8N5I2	Arrestin domain-containing protein 1	ARRDC1	ARRDC1	-0.264531	-0.167248	0.0972831
-0.60863	-0.15335	-0.348221	-0.666089	-1.16684	-1.45871	0.0456742	-0.819781	-0.953826	NaN	NaN	-0.498721	-1.26953	-0.742207	-0.726589	-0.942138	-0.783215	-0.302023	-1.11923	-0.853308	-0.478319	-0.720924	-0.796502	-0.248394	-0.458917	-0.653873	-0.839481	-1.33363	-1.12145	-0.252918	-1.07115	-0.126885	-0.738643	-1.55198	NaN	-1.06648	NaN	-0.654338	-0.432847	NaN	-0.787903	2057	P27540-3;P27540-4;P27540;P27540-2	P27540-3;P27540-4;P27540;P27540-2	Aryl hydrocarbon receptor nuclear translocator	ARNT	ARNT	-0.726589	-0.783215	-0.0566256
-0.431006	-0.302829	-1.77981	0.300412	-0.543153	NaN	0.248583	-0.0836827	NaN	NaN	0.340044	0.192466	-0.0378982	0.132819	-0.556251	-0.399671	-0.740299	0.15055	-0.646922	NaN	-0.358676	NaN	-0.239444	-1.11239	-0.243857	NaN	-0.65179	NaN	NaN	0.31475	-0.641891	1.11097	-0.773061	NaN	NaN	-0.930574	-1.05502	NaN	-0.207622	NaN	0.00757671	1819	P18440	P18440	Arylamine N-acetyltransferase 1	NAT1	NAT1	-0.0607905	-0.399671	-0.338881
2.13955	2.37187	0.849707	0.462818	0.658046	0.781148	-1.13538	0.579412	0.35194	0.999523	0.964945	1.3062	1.2407	1.49085	2.82051	0.530522	-0.596748	2.12615	1.61031	2.10599	0.493384	1.86438	NaN	1.32352	0.948658	1.27318	0.551361	1.05338	1.45654	2.03133	0.636483	1.79621	-0.606553	2.41794	0.578125	-0.683752	1.65018	1.24015	1.17231	1.87788	1.02015	1711	P15289-2;P15289	P15289-2;P15289	Arylsulfatase A;Arylsulfatase A component B;Arylsulfatase A component C	ARSA	ARSA	0.964945	1.24015	0.275204
-0.0660505	-0.502067	-0.747196	-0.781575	-0.170088	-2.58876	-1.9007	-0.116009	-1.54811	0.111842	-1.57302	-1.16446	-0.756173	-0.448352	-0.806567	-0.482443	-1.15708	-3.41484	-0.997576	-1.03582	-0.669237	-0.253651	-2.26261	-0.99729	-0.60699	-1.2166	-5.95638	-2.4689	-1.5455	-1.47231	-0.81081	-1.09474	-0.42822	0.557538	-0.521029	-1.6247	-0.957683	-1.01072	-0.0877962	0.0927119	-1.16559	1728	P15848;P15848-2	P15848;P15848-2	Arylsulfatase B	ARSB	ARSB	-0.756173	-1.00415	-0.247975
1.32805	1.87283	1.46548	NaN	NaN	NaN	0.921383	NaN	1.2296	-0.144352	NaN	0.951583	1.19028	0.662678	0.705504	NaN	NaN	2.48447	NaN	1.17034	0.629297	1.25473	0.557607	2.29541	NaN	NaN	NaN	NaN	NaN	NaN	1.31692	0.579574	0.681748	1.92604	0.652824	0.771844	1.29002	0.898653	NaN	2.31753	0.712552	2694	P51689-3;P51689;P51689-2	P51689-3;P51689	Arylsulfatase D	ARSD	ARSD	1.07093	1.0345	-0.0364349
NaN	NaN	NaN	NaN	0.511215	-0.948272	NaN	0.258968	-0.00430133	NaN	-0.165039	NaN	NaN	-0.634782	NaN	NaN	NaN	NaN	NaN	0.883237	NaN	-0.268454	0.192168	0.0958993	NaN	NaN	0.563102	NaN	NaN	NaN	-0.154405	NaN	NaN	-0.167968	0.574193	0.508482	NaN	NaN	-0.499222	NaN	NaN	6723	Q9BVC5;Q9BVC5-2	Q9BVC5;Q9BVC5-2	Ashwin	C2orf49	C2orf49	-0.0846701	0.144034	0.228704
-3.74814	-3.92991	-3.77979	-3.95388	-3.70112	-3.35813	-2.82319	-4.4886	-5.56525	-3.23141	-4.18872	-4.3007	-3.20844	-3.91139	-4.22699	-6.6745	-4.03956	-3.22952	-5.00718	-2.54811	-3.88403	-2.58461	-7.08661	-3.67305	-2.61063	-3.94066	-3.98088	-2.54098	-6.37951	-4.13474	-5.09571	-2.56763	-4.3932	-2.37233	-2.86485	-4.12483	-4.9141	-4.56892	-2.62522	-1.13728	-4.46832	1430	P08243-2;P08243;P08243-3	P08243-2;P08243;P08243-3	Asparagine synthetase [glutamine-hydrolyzing]	ASNS	ASNS	-3.91139	-3.96077	-0.0493822
-0.630684	-1.38262	-1.01517	-0.0874129	-0.839919	-0.205034	0.0841984	0.00600014	-1.09423	-0.790294	-0.259444	0.0563035	-0.191449	-0.316337	-0.781209	0.110033	-0.654743	-0.462101	-0.785641	-1.59647	-0.501169	-1.64512	-0.508332	-1.17479	0.152539	-1.36976	-0.815682	-1.48958	-1.07537	-0.272577	-0.328082	0.317676	-1.30704	-1.34841	-1.52276	-0.880599	-1.23867	-1.3868	-0.474885	-1.45935	-0.463053	616	O43776;O43776-2	O43776	Asparagine--tRNA ligase, cytoplasmic	NARS	NARS	-0.316337	-0.848141	-0.531804
0.647326	-0.698796	-1.37037	-0.307067	-1.30765	0.37722	0.241696	-0.776954	-1.81474	-1.60279	0.100527	0.02952	0.101428	-0.523403	-0.679012	-1.19489	-0.773035	0.298794	-0.164076	-1.61408	-0.671238	-0.917413	-0.352707	-0.830142	-0.0281599	-1.71084	-0.660106	-0.782646	-0.871348	-0.137102	-1.15535	-0.626421	-0.38983	-0.515111	-1.87335	-1.29308	-1.62138	-1.65539	0.358533	-1.01789	0.526497	1775	P17174;P17174-2	P17174;P17174-2	Aspartate aminotransferase, cytoplasmic	GOT1	GOT1	-0.523403	-0.77784	-0.254438
0.286692	0.029527	0.00361426	-0.545168	0.237326	0.205444	-1.07066	-0.484023	0.361193	-0.0128379	-0.630737	-0.425977	-0.0759881	-0.387791	0.0948185	-0.329875	0.0307329	0.00138676	0.302546	0.966445	0.0163386	0.564588	0.550244	0.0416107	-0.262828	0.120823	0.149332	0.795762	0.928391	-0.643926	0.0565613	-0.463937	0.864515	0.171416	0.738686	0.4413	0.0950529	0.642919	0.0341908	0.423559	0.620212	1164	P00505;P00505-2	P00505;P00505-2	Aspartate aminotransferase, mitochondrial	GOT2	GOT2	-0.0128379	0.160374	0.173212
-0.441563	-0.681939	-0.629153	-0.524905	-1.10212	-0.119154	-0.517969	-0.423447	-1.107	-0.818216	-0.63486	-0.512874	-0.484421	-0.742021	-0.497279	-0.168157	-0.844717	-0.431284	-0.350787	-0.836236	-0.589924	-0.862307	-0.564757	-1.07739	-0.414347	-0.994171	-0.809769	-1.06373	-0.954639	-0.582228	-0.608228	-0.882087	-0.950797	-0.717135	-1.05039	-0.992716	-1.02028	-0.844687	-0.518194	-0.993874	-0.265421	1699	P14868;P14868-2	P14868;P14868-2	Aspartate--tRNA ligase, cytoplasmic	DARS	DARS	-0.524905	-0.840461	-0.315556
-0.3711	-0.883943	-0.392061	-0.631875	-0.663584	-0.135078	-1.06911	-0.270527	0.358981	0.0601341	-0.723703	-0.454311	-0.441477	-0.209987	0.141795	-0.306035	0.195456	-0.155083	-0.116216	0.494168	-0.148957	0.119736	0.0917111	-0.107454	-0.618538	-0.205206	-0.148775	0.717056	0.365918	-0.334557	-0.0972592	-0.314818	0.338408	-0.148397	-0.0656022	0.224838	-0.252041	-0.119961	-0.206837	-0.0615075	-0.420238	4619	Q6PI48	Q6PI48	Aspartate--tRNA ligase, mitochondrial	DARS2	DARS2	-0.392061	-0.118088	0.273972
1.29101	1.03057	0.270742	0.747769	0.656189	1.02861	0.382878	0.401662	0.669076	-0.0493795	0.664417	0.879243	1.01895	0.495355	0.809049	1.16493	0.816572	1.45043	0.501285	0.0601535	1.31866	-0.63971	1.47223	0.946551	0.944964	0.0697584	0.927573	0.00713331	0.174495	0.872645	1.0009	0.788847	0.262941	0.399154	0.0334298	0.568622	-0.161166	0.265315	1.20063	0.214121	1.41814	8004	Q9ULA0	Q9ULA0	Aspartyl aminopeptidase	DNPEP	DNPEP	0.669076	0.678734	0.00965881
1.43267	3.06052	1.15862	0.852683	1.50696	0.428065	1.39379	1.21389	1.8568	1.70883	0.655962	0.690761	1.09395	0.229571	1.5687	1.25376	1.1481	1.49881	1.45447	1.84601	1.44928	1.75284	0.358211	0.936968	0.490864	1.66576	-3.64065	NaN	0.168394	1.08776	1.65655	2.01791	1.62864	0.459025	0.429869	2.00741	1.59247	1.80167	0.647433	1.28603	1.94099	3432	Q12797;Q12797-10;Q12797-6;Q12797-11;Q12797-2;Q12797-7;Q12797-9;Q12797-5;Q12797-8;Q12797-4;Q12797-3	Q12797;Q12797-10	Aspartyl/asparaginyl beta-hydroxylase	ASPH	ASPH	1.21389	1.44928	0.235396
NaN	-0.947458	-0.676334	0.958895	-0.734486	0.558277	-0.359721	0.608691	-1.18371	-1.34713	1.04639	0.562362	1.20893	0.273783	-0.898685	-0.00474156	-0.218161	-0.60609	-0.709503	-1.82142	-0.582826	NaN	-0.297968	-0.625616	0.792968	-0.660691	-0.280528	NaN	-1.47336	0.811173	-0.185431	-0.232663	-1.19213	-0.730965	-1.59646	-0.800396	-0.992834	-1.44343	-1.48177	NaN	-0.43272	3882	Q15121;Q15121-2	Q15121;Q15121-2	Astrocytic phosphoprotein PEA-15	PEA15	PEA15	-0.042969	-0.625616	-0.582647
-1.14006	-0.959017	-2.20625	-1.34701	-1.63698	-0.599754	-0.658864	-0.601919	-1.18388	-1.49155	-1.03597	-1.02646	-1.24695	-1.41869	-1.39551	-0.896714	-0.862581	-0.977268	-1.51271	-1.58558	-1.29104	-2.29673	-0.59641	-0.17417	-0.931042	-1.31144	-0.720649	-1.33742	-1.16352	-1.11277	-0.980055	-0.492742	-1.39547	-2.5968	-1.96649	-0.997281	-2.05817	-1.28436	-1.45841	-1.59774	-0.924115	7762	Q9UBB4;Q9UBB4-2	Q9UBB4;Q9UBB4-2	Ataxin-10	ATXN10	ATXN10	-1.18388	-1.22394	-0.0400633
NaN	-1.36075	NaN	-0.973426	NaN	-0.519814	0.0119001	-1.01197	-0.73764	NaN	NaN	-0.989188	-1.11242	-1.09385	NaN	-2.39111	-1.35321	NaN	-0.343681	NaN	-1.34318	-0.522466	0.12091	-0.656384	-0.945475	-0.636362	-0.748457	-0.499895	NaN	-0.281558	-0.938847	NaN	-0.408246	NaN	-0.429567	-0.906378	-1.82682	-0.110402	NaN	-0.657127	-0.546289	6501	Q99700-2;Q99700-4;Q99700;Q99700-5	Q99700-2;Q99700-4;Q99700;Q99700-5	Ataxin-2	ATXN2	ATXN2	-0.989188	-0.646373	0.342815
-0.829047	-0.777876	-0.669647	-0.645645	-1.16723	-0.756012	-0.34423	-0.771408	-0.917927	-0.599663	-0.473819	-0.576118	-0.932521	-0.745282	-0.767964	-0.65039	-1.01278	-0.771417	-0.74135	-0.696877	-1.07559	-0.674592	-0.814189	-0.658665	-0.753818	-0.420201	-0.80222	-1.07101	-0.860914	-0.616948	-0.909953	-0.615944	-0.966915	-0.697405	-1.17676	-1.12489	-0.640114	-0.615209	-1.24318	-0.726665	-0.863031	5730	Q8WWM7;Q8WWM7-6;Q8WWM7-8;Q8WWM7-5;Q8WWM7-4;Q8WWM7-9;Q8WWM7-2;Q8WWM7-3;Q8WWM7-7	Q8WWM7;Q8WWM7-6;Q8WWM7-8;Q8WWM7-5;Q8WWM7-4;Q8WWM7-9;Q8WWM7-2;Q8WWM7-3	Ataxin-2-like protein	ATXN2L	ATXN2L	-0.756012	-0.762617	-0.00660533
0.36338	-0.048714	0.203046	0.703641	-0.0616682	0.322882	0.46012	0.558026	0.500378	-0.597842	0.660229	0.759927	0.592134	0.472318	0.650244	0.70312	0.593598	0.566508	0.21951	-0.534198	0.401756	-0.457533	1.27764	0.965323	0.780959	-0.236409	0.495566	NaN	-0.242305	0.931038	0.720556	0.785843	0.633532	-0.383262	-0.662183	0.406203	-0.61373	-0.064619	0.126084	NaN	0.93268	2795	P54252-4;P54252;P54252-1;P54252-3;P54252-5	P54252-4;P54252;P54252-1;P54252-3;P54252-5	Ataxin-3	ATXN3	ATXN3	0.472318	0.450885	-0.0214337
-0.413578	-0.417949	NaN	-1.31421	-0.205321	-1.15818	-0.788937	-0.0625358	0.953104	0.156165	-0.904343	-1.17114	-0.976303	NaN	-0.469388	-0.0511798	0.279701	-0.360242	-0.42025	0.128326	-0.216794	-0.313514	0.251284	0.443861	-0.36576	-0.296849	0.710159	0.646797	0.454933	-0.928521	0.180084	NaN	0.277466	-1.01764	0.610074	0.883845	-0.522776	-0.00144422	-0.351052	0.0579323	-1.29297	4650	Q6SPF0	Q6SPF0	Atherin	SAMD1	SAMD1	-0.469388	-0.00144422	0.467944
-1.50415	-0.80852	-0.938956	-1.17432	-0.633354	NaN	-0.208117	-0.694722	-0.437479	-0.492436	-1.09893	-1.16863	-0.849029	-1.23819	-0.756958	-1.13817	-0.954461	-1.53318	-1.11571	-0.0686202	-0.630782	-0.337961	-1.18709	-0.918479	-1.01562	-0.433601	-0.718	-0.467697	0.0223102	-1.32211	-0.799128	-0.86565	-0.749939	-0.207648	-1.12116	-0.37989	-0.569328	-0.59553	-0.914714	-0.380619	-1.47225	5516	Q8NHH9-2;Q8NHH9;Q8NHH9-4;Q8NHH9-5;Q8NHH9-3	Q8NHH9-2;Q8NHH9;Q8NHH9-4;Q8NHH9-5;Q8NHH9-3	Atlastin-2	ATL2	ATL2	-0.828775	-0.774534	0.0542409
-0.0933318	0.400504	0.968548	0.583229	0.45514	-0.462573	0.611511	0.952783	0.70973	1.20509	0.645163	0.619731	0.188468	0.945035	0.872529	0.384996	0.298447	-0.328451	-0.103268	0.206054	0.617081	0.714534	-0.357068	1.09554	0.485019	1.37755	0.256954	0.302892	0.245488	0.562901	0.525986	0.996551	0.291305	0.833169	-0.164005	0.389807	1.0228	0.630589	0.481519	0.317286	-0.447464	4491	Q6DD88	Q6DD88	Atlastin-3	ATL3	ATL3	0.619731	0.387401	-0.23233
0.132386	-0.0621139	0.284839	0.0362932	0.278335	0.273507	0.187184	0.186867	0.244591	0.404146	-0.0462669	-0.0924545	-0.247867	0.0014227	0.10888	0.0508182	0.281924	-0.243337	0.386711	0.769979	0.405327	0.532363	0.27687	-0.0160721	-0.00586049	0.270302	0.136508	0.549589	0.562956	-0.0467184	0.249205	0.122075	0.695899	0.291256	0.248478	0.48035	0.377176	0.459145	0.047264	0.32975	0.276338	1994	P24539	P24539	ATP synthase F(0) complex subunit B1, mitochondrial	ATP5F1	ATP5F1	0.132386	0.279397	0.147011
-0.369605	-0.754459	-1.02246	-1.68166	-1.89656	-0.810515	-0.686558	-1.27905	-1.24288	-0.361726	-1.35417	-1.3301	-1.73084	-1.4988	-2.29763	-0.636317	-1.01293	-0.627728	-0.137204	-0.423311	-1.35863	NaN	-1.05417	-1.26332	-0.837352	-0.324911	-0.57784	-0.129794	-0.354268	-0.987415	-1.20445	-1.38298	-0.46541	-1.2796	-0.631521	-1.14949	-1.75182	-1.13329	-1.25799	NaN	-1.17032	4377	Q5TC12-3;Q5TC12;Q5TC12-2	Q5TC12-3;Q5TC12;Q5TC12-2	ATP synthase mitochondrial F1 complex assembly factor 1	ATPAF1	ATPAF1	-1.27905	-1.00018	0.278874
0.777352	1.45437	0.613788	0.107794	1.80484	0.0433289	0.786297	0.0312172	0.552682	0.922865	0.101709	-0.140688	0.132183	0.353048	0.76527	-0.198967	0.542065	0.00624396	0.162073	1.03884	1.0698	0.731605	1.1886	0.461767	-0.58584	0.887735	-0.179945	0.749444	1.71101	0.313543	0.249377	0.723042	2.23042	0.670704	0.961448	0.752326	0.928134	0.412469	0.468827	0.772218	0.73018	5328	Q8N5M1	Q8N5M1	ATP synthase mitochondrial F1 complex assembly factor 2	ATPAF2	ATPAF2	0.552682	0.726611	0.173929
0.752949	-0.00898117	0.559878	-0.0288414	0.311778	0.233668	0.25135	0.370047	0.290378	0.706875	0.14493	-0.105243	-0.0696651	0.368904	0.619314	0.226279	0.367492	-0.296698	0.500129	0.885624	0.435948	1.07312	0.26192	0.0561619	0.111192	0.690265	0.37199	0.627547	0.813776	0.126083	0.279043	0.39643	0.627166	0.324581	0.1852	0.594346	0.495067	0.85049	-0.0482585	0.323191	0.315839	1263	P03928	P03928	ATP synthase protein 8	MT-ATP8	MT-ATP8	0.290378	0.369741	0.0793628
0.184095	0.330202	0.378342	0.21409	0.432667	0.0905038	0.370867	0.325996	0.453786	0.517322	0.0518107	-0.0684409	0.146001	0.292072	0.457347	0.120781	0.299071	-0.0964198	0.432024	0.731291	NaN	0.85956	0.38932	-0.0275696	0.0611537	0.329455	0.0878412	0.665706	0.397258	0.137737	0.355812	0.231551	0.839891	0.57337	0.316816	0.787265	0.465115	0.607895	0.115432	0.458657	0.273778	1175	P00846	P00846	ATP synthase subunit a	MT-ATP6	MT-ATP6	0.325996	0.355812	0.0298161
0.0717975	-0.0099458	0.353066	0.119856	0.430439	0.259257	0.240009	0.100429	0.428637	0.509005	-0.125305	0.029832	-0.00192195	0.105591	0.184358	0.0492885	0.320303	-0.153319	0.477815	0.954483	0.288414	0.552776	0.462401	-0.0252042	0.110773	0.451573	0.205013	0.604409	0.766644	0.0018348	0.291251	0.241132	0.776941	0.406532	0.441074	0.526737	0.552696	0.610738	0.203545	0.384054	0.371816	2020	P25705;P25705-2;P25705-3	P25705;P25705-2;P25705-3	ATP synthase subunit alpha, mitochondrial	ATP5A1	ATP5A1	0.119856	0.395293	0.275437
0.0185784	-0.0582696	0.236154	0.0802693	0.316365	0.202858	0.146812	0.166969	0.300234	0.464952	-0.155468	-0.0990016	-0.0649826	0.11396	0.209775	0.051098	0.315857	-0.226472	0.364814	0.892596	0.284801	0.528948	0.410021	-0.0635815	0.0153068	0.362573	0.121699	0.526254	0.701733	-0.0139197	0.289357	0.193895	0.649801	0.373134	0.431505	0.481134	0.446537	0.562589	0.200058	0.33257	0.252395	1354	P06576	P06576	ATP synthase subunit beta, mitochondrial	ATP5B	ATP5B	0.146812	0.347571	0.200759
0.0567473	0.071743	0.315552	0.143938	0.326089	0.231373	0.348595	0.321835	0.497653	0.620502	0.0632412	0.119207	-0.0268055	0.132916	0.243671	0.124139	0.367883	-0.143703	0.443049	0.820436	0.466446	0.571289	0.378592	-0.0198812	0.15136	0.350137	0.202849	0.553937	0.665943	0.0676775	0.380241	0.294985	0.764842	0.419006	0.242272	0.503458	0.518143	0.547903	0.168141	0.358174	0.263519	921	O75947;O75947-2	O75947;O75947-2	ATP synthase subunit d, mitochondrial	ATP5H	ATP5H	0.231373	0.373237	0.141864
0.0737055	0.0115256	0.38976	0.177464	0.435445	0.278244	0.121183	0.187103	0.449816	0.669438	-0.0955071	0.102295	0.000550544	0.307998	0.283436	0.140174	0.334863	-0.0866575	0.535569	1.25444	0.314073	0.69689	0.583491	0.0553897	0.224428	0.570007	0.294835	0.632456	0.8487	-0.0292218	0.329072	0.320217	0.660842	0.519278	0.365521	0.672182	0.554169	0.658053	0.388449	0.457106	0.483707	2137	P30049	P30049	ATP synthase subunit delta, mitochondrial	ATP5D	ATP5D	0.187103	0.470406	0.283303
0.439274	0.454621	0.511782	0.102063	0.930416	0.496744	0.403145	-0.415031	0.770276	0.949802	0.232685	0.251825	0.217311	0.441035	0.291678	0.270492	0.816888	0.216079	0.744436	1.32302	0.496972	0.96861	0.873762	0.431214	0.290738	0.729432	0.679053	0.815041	1.03914	0.293668	0.507162	0.538657	1.33701	0.608694	0.266255	0.882351	0.815513	0.96508	0.441187	0.72192	0.698885	2876	P56385	P56385	ATP synthase subunit e, mitochondrial	ATP5I	ATP5I	0.439274	0.710403	0.271129
0.0126144	0.0797483	0.269221	0.0430949	0.344486	1.66812	0.291828	0.11013	0.248989	0.656933	-0.0911973	0.159954	0.104887	0.277445	0.171314	0.146516	0.412421	-0.132099	0.416646	1.0309	0.430845	0.426104	0.372154	-0.0298865	0.149985	0.573645	0.140649	0.787096	0.380901	0.273227	0.222995	0.320198	0.893867	0.473925	0.40312	0.448495	0.536788	0.617642	0.196712	0.52112	0.318076	2875	P56381;Q5VTU8	P56381;Q5VTU8	ATP synthase subunit epsilon, mitochondrial;ATP synthase subunit epsilon-like protein, mitochondrial	ATP5E;ATP5EP2	ATP5E	0.171314	0.40777	0.236456
-0.165566	-0.0353605	0.299139	0.076039	0.428373	0.220539	0.197566	0.211622	0.244778	0.486621	-0.170699	-0.0464051	-0.0464147	0.163307	0.294907	0.0960656	0.352375	-0.242629	0.312507	0.859484	0.354661	0.457531	0.509925	-0.0146856	0.129627	0.286227	0.160973	0.507303	0.528917	0.0192675	0.288169	0.299928	0.690967	0.399418	0.257734	0.571127	0.409196	0.531355	0.117364	0.163691	0.301602	2861	P56134-3;P56134	P56134-3;P56134	ATP synthase subunit f, mitochondrial	ATP5J2	ATP5J2	0.197566	0.307055	0.109489
0.309712	NaN	0.346351	NaN	0.510546	-0.0840703	NaN	NaN	NaN	NaN	0.238092	NaN	NaN	NaN	NaN	NaN	NaN	-0.287129	NaN	1.66059	NaN	NaN	NaN	NaN	0.169442	NaN	NaN	NaN	NaN	NaN	NaN	NaN	NaN	0.149857	NaN	NaN	NaN	NaN	-0.180167	-0.113622	NaN	2862	P56134-4;P56134-2	P56134-4;P56134-2	ATP synthase subunit f, mitochondrial	ATP5J2	ATP5J2	0.309712	0.0181179	-0.291595
-0.230654	-0.0101837	0.33238	0.164436	0.293581	0.27286	0.213811	0.156783	0.334801	0.571705	-0.0796583	-0.113801	-0.0171741	0.0836165	0.218585	0.132709	0.415821	-0.222043	0.509775	1.15733	0.434051	0.562252	0.378078	-0.0604165	0.0845875	0.384604	0.164475	0.477335	0.693384	0.207502	0.387646	0.24288	0.650867	0.420636	0.22061	0.557969	0.469507	0.609224	0.0820793	0.363213	0.315798	925	O75964	O75964	ATP synthase subunit g, mitochondrial	ATP5L	ATP5L	0.164436	0.386125	0.221689
0.226079	0.139467	0.379655	0.0299005	0.457033	0.249946	0.209454	0.253026	0.421545	0.560897	-0.0234288	0.0706155	-0.00455641	0.188911	0.252626	0.114278	0.43658	-0.104154	0.450892	0.922869	0.398011	0.546575	0.339593	0.014152	0.107113	0.492917	0.126422	0.581488	0.751671	0.142211	0.343855	0.231855	0.725938	0.400663	0.483892	0.61412	0.605618	0.641322	0.277042	0.443828	0.553056	2307	P36542	P36542	ATP synthase subunit gamma, mitochondrial	ATP5C1	ATP5C1	0.226079	0.440204	0.214125
0.170421	0.00925874	0.406549	0.0436583	0.436334	0.18617	0.0784406	0.0340402	0.492895	0.416921	-0.206663	0.0425154	-0.156671	0.0326595	0.0857891	-0.030352	0.410723	-0.194551	0.433282	0.826727	0.016713	0.524126	0.346926	0.115182	0.0810925	0.462125	0.261684	0.61828	0.628394	-0.0318496	0.16888	0.259575	0.737312	0.344228	0.0935687	0.441539	0.408945	0.58533	-0.0659301	0.346341	0.266604	2508	P48047	P48047	ATP synthase subunit O, mitochondrial	ATP5O	ATP5O	0.0784406	0.345284	0.266844
1.87486	1.76591	1.18949	1.03596	1.42479	1.60169	0.0968774	1.04645	1.64492	1.47224	0.577375	0.958855	0.930911	0.653615	1.79391	1.17617	2.2025	1.5358	1.53576	1.62042	1.85864	1.53078	2.07489	1.82642	0.668087	0.981444	1.21384	1.30521	1.74961	1.88005	1.98952	0.578898	2.14846	1.14828	1.43454	1.95028	1.94341	2.29343	NaN	1.5117	1.62069	6514	Q99766;Q99766-3;Q99766-2	Q99766	ATP synthase subunit s, mitochondrial	ATP5S	ATP5S	1.18949	1.62042	0.430939
-0.149771	0.0957474	0.451378	0.183782	0.622188	0.293427	0.320264	0.000872274	0.277052	0.87075	0.0691481	0.114997	0.1109	0.336188	0.177093	0.00195423	0.494935	-0.144338	0.520867	1.04355	0.396893	0.713854	0.77266	0.253843	0.161751	0.577025	0.265958	0.59131	0.943512	0.333632	0.0873525	0.350537	0.945531	0.426462	0.312243	0.493431	0.566914	0.808988	0.0912928	0.52875	0.596748	1831	P18859;P18859-2	P18859;P18859-2	ATP synthase-coupling factor 6, mitochondrial	ATP5J	ATP5J	0.183782	0.494183	0.310401
0.734417	0.037705	0.127204	0.471491	0.515041	0.580441	0.150583	0.400693	-0.036524	0.0996189	0.514698	0.49787	0.577444	0.305863	0.349084	0.652677	0.0987776	0.162411	0.581979	0.0266176	0.412208	-0.0223014	0.577752	0.307253	0.691628	0.212848	-0.179442	-0.448391	0.414752	0.516361	0.41347	0.133338	0.46699	0.209573	-0.304514	0.161369	0.164366	-0.10235	0.778081	-0.136482	0.290689	598	O43681	O43681	ATPase ASNA1	ASNA1	ASNA1	0.400693	0.21121	-0.189483
-0.63694	-0.777743	-1.1603	-1.16976	-0.371923	-1.08109	-1.70329	-0.976597	-0.359413	-0.641941	-1.26297	-1.06687	-1.10599	-2.014	-1.02056	-1.11492	-0.561045	-0.948628	-0.366744	0.309816	-0.837877	-0.249682	-0.144801	-0.646116	-1.73949	-0.610513	-1.10079	-0.238158	0.00405448	-1.05858	-0.472632	-1.42746	0.10978	-0.524674	-0.211978	-0.211397	-0.75818	-0.200761	-0.926799	-0.161927	-0.114062	5417	Q8NBU5;Q8NBU5-2	Q8NBU5;Q8NBU5-2	ATPase family AAA domain-containing protein 1	ATAD1	ATAD1	-1.06687	-0.498653	0.568219
-1.43632	-0.722538	-2.10897	-2.01768	-1.76162	-2.36991	-1.84564	-2.37896	-0.715729	-1.44818	-1.97069	-2.00548	-2.35202	-2.00971	-1.26356	-2.25219	-1.62867	-2.22869	-2.73179	-0.613421	-1.38548	-0.681946	-3.03188	-1.4181	-2.4277	-0.0589307	-0.691142	-1.2088	-0.775466	-1.85663	-1.38935	-2.59894	-1.86346	-1.44482	-1.41818	-1.0592	-0.923055	-1.04357	-1.34089	-0.680686	-1.71003	4640	Q6PL18;Q6PL18-2	Q6PL18	ATPase family AAA domain-containing protein 2	ATAD2	ATAD2	-1.97069	-1.40372	0.566966
1.0576	1.30784	0.548765	0.463873	1.5571	-0.168395	-2.80629	0.485825	0.149242	1.35893	-0.284256	0.217827	NaN	0.363031	0.273961	0.493986	0.932287	0.193863	0.501956	0.571086	0.574712	0.573662	0.589199	0.928622	NaN	0.61004	0.603575	NaN	1.24164	-0.107966	-0.167111	0.167278	0.611236	NaN	NaN	1.36056	NaN	0.0483704	NaN	1.18484	0.536684	8015	Q9ULI0-2;Q9ULI0	Q9ULI0-2;Q9ULI0	ATPase family AAA domain-containing protein 2B	ATAD2B	ATAD2B	0.413452	0.574187	0.160735
-0.54707	-0.523732	-0.331129	-0.878132	-0.0275696	-0.455345	-0.764276	-0.787428	0.193666	-0.111991	-0.850958	-1.01698	-0.712344	-0.904155	-0.63235	-0.475692	-0.0888689	-1.03737	-0.161835	0.416632	-0.435287	-0.132692	-0.0821599	-0.648047	-1.02393	-0.363681	-0.280762	0.317404	0.0425113	-0.781413	-0.344646	-0.822872	0.209489	-0.353747	0.242888	0.0203447	-0.153829	-0.230556	-0.72733	-0.0963941	-0.301283	7508	Q9NVI7-2;Q9NVI7;Q9NVI7-3;Q5T9A4-2	Q9NVI7-2;Q9NVI7;Q9NVI7-3	ATPase family AAA domain-containing protein 3A	ATAD3A	ATAD3A	-0.63235	-0.255659	0.376691
-0.587433	-0.783181	-1.07025	-1.06714	-1.24218	-1.15961	NaN	-0.424985	-1.68386	-0.456506	NaN	NaN	-2.78801	-1.85275	-3.03054	-2.27513	-1.17325	-3.35634	-0.955459	-0.465018	-2.10475	-0.760955	-1.09941	-3.67695	-0.890545	-0.796823	0.861199	-0.463907	-1.72939	-1.94978	NaN	-1.33855	-1.45067	NaN	-1.53475	-1.65989	-0.517594	-1.35635	-2.23202	-0.810016	NaN	4370	Q5T9A4;Q5T9A4-3	Q5T9A4;Q5T9A4-3	ATPase family AAA domain-containing protein 3B	ATAD3B	ATAD3B	-1.11493	-1.33855	-0.223616
0.986451	0.572118	0.660007	0.516476	0.548619	0.629024	0.783893	0.758916	0.526592	0.410697	0.678392	0.698978	0.716486	0.533863	0.455701	0.591524	0.506197	0.63051	0.70933	1.37907	0.70379	1.32071	0.463319	0.649562	0.581668	0.613083	0.294466	0.333253	0.0969644	0.60847	0.45328	0.577734	1.01739	0.993032	0.831301	0.754919	0.954971	0.946507	0.799025	0.33111	0.321646	7911	Q9UII2;Q9UII2-3;Q9UII2-2	Q9UII2	ATPase inhibitor, mitochondrial	ATPIF1	ATPIF1	0.629024	0.621796	-0.00722712
1.93238	1.75397	0.601698	0.767356	3.24182	2.75216	1.05502	1.09059	3.63425	1.98406	0.748607	0.611964	1.77751	0.547593	2.18328	2.48628	3.47785	2.52122	2.73777	2.6406	2.69832	2.13849	3.74578	2.30865	0.423744	2.15626	2.23046	1.35361	2.52071	0.879099	2.95527	-0.201514	3.39815	1.36741	2.58314	2.77902	1.00577	2.26195	1.74101	1.48245	2.28307	6400	Q96S55;Q96S55-2;Q96S55-3;Q96S55-4	Q96S55;Q96S55-2;Q96S55-3	ATPase WRNIP1	WRNIP1	WRNIP1	1.75397	2.29586	0.54189
-0.807894	-2.11611	-1.33064	-1.17562	-0.609152	-1.92581	-1.91394	-1.53901	-1.35797	-0.832922	-1.42874	-1.4258	-1.64354	-0.876954	-1.71903	-1.98961	-1.61469	-2.02835	-1.23635	0.0197888	-1.16917	-0.703393	-1.75629	-1.4744	-1.78216	-1.26397	-1.89191	-0.18099	-0.829981	-1.55766	-1.66382	0.115923	-1.00626	-0.560112	-1.21184	-1.31201	-0.747598	-1.37784	-1.21132	-0.657814	-1.83411	7396	Q9NRK6	Q9NRK6	ATP-binding cassette sub-family B member 10, mitochondrial	ABCB10	ABCB10	-1.4258	-1.25016	0.175638
0.121881	0.43998	0.400336	0.183811	0.682959	0.259766	-0.0822479	-0.241422	0.802219	0.425442	0.00199542	-0.223596	0.0266959	0.0261901	0.304196	-0.297905	-0.0247029	0.601158	0.243434	1.19628	0.0718114	0.654161	0.255468	0.439074	-0.241164	0.587095	-0.0414344	0.626302	0.837457	0.226357	0.636537	-0.107568	1.28457	0.20817	0.533428	0.450274	0.622105	0.755431	0.309851	0.682855	0.825233	756	O75027;O75027-2;O75027-3	O75027;O75027-2;O75027-3	ATP-binding cassette sub-family B member 7, mitochondrial	ABCB7	ABCB7	0.183811	0.491851	0.308039
-1.50794	-1.35267	0.286176	0.0093297	-0.608354	0.229372	-0.6028	-1.24066	-1.33065	-0.219192	-0.898715	-0.123032	-1.0121	0.0561879	-0.537475	-1.52605	-1.38509	-1.41399	-1.58037	-0.520734	-1.07041	-0.143746	-1.78997	0.353093	-0.302361	-0.944567	-1.11611	-0.474733	-2.0563	-0.705199	-1.70877	0.665077	-1.35913	-0.0114024	-0.643754	-1.19892	-0.288431	-0.695034	-2.23206	-1.15719	-2.6413	2245	P33897	P33897	ATP-binding cassette sub-family D member 1	ABCD1	ABCD1	-0.6028	-1.09326	-0.490461
-1.15509	-0.37183	-0.0536137	-0.325491	-1.20978	-0.0627866	-0.326005	-0.230767	-0.0027322	-0.00716753	-0.523133	-0.18355	-0.60169	-0.11784	-0.0864751	-0.725905	-0.797684	-1.4545	-0.472683	-0.160448	-1.26928	-0.136274	-0.46759	-0.336783	-0.872077	0.285414	-1.14203	-1.16747	-0.446257	-0.0472808	-0.66293	-0.104415	-0.268598	-0.450014	-0.0786466	-0.443493	0.25786	-0.00717549	-1.12701	-0.290268	-0.425167	2082	P28288;P28288-2;P28288-3	P28288;P28288-2	ATP-binding cassette sub-family D member 3	ABCD3	ABCD3	-0.230767	-0.444875	-0.214108
-0.541447	-0.901052	-1.40316	-1.13328	-1.11297	-0.42945	-1.09148	-1.14787	-0.868597	-1.13113	-1.0985	-1.16963	-0.792227	-1.51981	-1.00577	-0.631509	-0.9427	-0.7755	-0.532694	-0.521482	-1.16417	-1.21823	-0.672744	-1.13272	-0.866856	-0.874992	-0.859794	-0.771554	-0.520046	-0.999676	-0.979837	-1.14088	-0.466342	-1.05342	-1.02878	-1.04103	-0.905178	-0.683175	-0.741139	-0.917652	-0.514132	2955	P61221	P61221	ATP-binding cassette sub-family E member 1	ABCE1	ABCE1	-1.0985	-0.870924	0.227578
-0.519468	-0.999371	-0.271176	-0.518504	-0.801702	-0.495047	-0.0446583	-0.538158	-1.07301	-0.649855	-0.455421	-0.35042	-0.475066	-0.478583	-0.633237	-0.754098	-0.9838	0.0130265	-0.79028	-0.662413	-0.950971	-0.796333	-1.01628	-0.869598	-0.223132	-0.664416	-0.856855	-0.535826	-0.755458	-0.494976	-1.01892	-0.441011	-0.869746	-0.610375	-0.777593	-1.23774	-0.612414	-0.548683	-0.500937	-0.980234	-0.835024	5469	Q8NE71;Q8NE71-2	Q8NE71;Q8NE71-2	ATP-binding cassette sub-family F member 1	ABCF1	ABCF1	-0.518504	-0.766525	-0.248021
-1.84742	-1.5021	-1.59658	-1.27283	-1.21172	-1.07978	-0.461642	-1.03986	-1.42985	-0.949994	-1.37876	-1.07695	-1.60122	-1.13835	-1.54312	-1.30573	-1.60307	-1.06771	-1.18187	-0.84051	-2.13513	-1.19847	-1.42014	-1.1786	-0.764436	-1.01996	-1.27081	-1.18656	-1.12127	-1.4866	-1.33766	-0.648014	-1.46863	-1.26038	-1.29246	-1.6912	-0.712928	-1.12296	-1.55478	-1.35542	-1.59837	7828	Q9UG63;Q9UG63-2	Q9UG63;Q9UG63-2	ATP-binding cassette sub-family F member 2	ABCF2	ABCF2	-1.27283	-1.2656	0.00723499
-1.40166	-1.07569	-0.863524	-0.302761	-0.285734	-0.876482	0.0476824	-0.189222	-0.517205	-0.807959	-0.32456	-0.114531	-0.561144	-0.339484	-0.840543	-0.557767	-0.672402	-0.00578581	-0.460305	-0.890304	-0.509452	-1.15502	-0.412404	-0.570039	-0.0680581	-1.13281	-0.607966	-1.15583	-0.55099	-0.28353	-0.773932	0.181844	-0.907211	-0.694268	-1.15798	-0.296864	-0.859633	-0.8392	-1.2216	-1.87243	-0.218761	7478	Q9NUQ8;Q9NUQ8-2	Q9NUQ8;Q9NUQ8-2	ATP-binding cassette sub-family F member 3	ABCF3	ABCF3	-0.517205	-0.640184	-0.12298
-0.68995	-0.333513	-0.958291	-0.389642	-1.64874	-0.445338	-0.83723	-0.586144	-1.53937	-1.05819	-0.362253	-0.391954	-0.528502	-0.580401	-0.732212	-0.838506	-0.807691	-0.376185	-0.986511	-1.4632	-0.810288	-1.51095	-0.565114	-0.347351	-0.625566	-1.02638	-0.805999	-1.36089	-1.11997	-0.47425	-1.09761	-0.908116	-1.0893	-1.13901	-1.63721	-1.38799	-1.03256	-1.18937	-1.10472	-0.981637	-0.271852	2761	P53396	P53396	ATP-citrate synthase	ACLY	ACLY	-0.586144	-1.00644	-0.4203
NaN	1.17271	0.273651	0.388899	0.0550003	0.919242	NaN	0.115151	NaN	0.109106	-0.410804	0.702945	-0.079926	NaN	NaN	0.434651	NaN	0.841334	0.737537	0.112832	NaN	NaN	NaN	1.04506	-0.457874	NaN	1.0214	NaN	-1.15109	0.326425	0.553735	NaN	0.847198	-0.296944	NaN	NaN	-0.244104	-0.420711	NaN	NaN	-0.108731	5112	Q8IW45;Q8IW45-2;Q8IW45-3	Q8IW45;Q8IW45-2	ATP-dependent (S)-NAD(P)H-hydrate dehydratase	CARKD	CARKD	0.194401	0.326425	0.132024
-0.0472937	-0.359692	0.412779	0.296383	-0.118045	0.350977	0.633551	0.81539	0.0903159	0.195821	0.530264	0.686181	0.545247	0.403958	0.270364	0.91234	0.218039	0.560275	0.277025	-0.656438	0.496166	-0.637267	0.314879	0.270331	0.639344	0.0332373	0.0800066	-0.531348	-0.749559	0.535423	0.711334	0.139223	-0.464581	0.605058	-0.466058	-0.114618	-0.157987	-0.113255	0.692478	-0.884248	0.11502	1801	P17858;P17858-2	P17858;P17858-2	ATP-dependent 6-phosphofructokinase, liver type	PFKL	PFKL	0.350977	0.127122	-0.223856
-1.24446	-1.63972	-0.52079	-0.474249	-1.09287	1.34166	-0.108444	-0.0481515	0.182526	-0.35912	-0.133167	0.202506	-0.0404997	-0.251012	-0.500186	0.836818	0.079037	-0.979129	0.314317	-1.24626	-0.421845	-1.55802	0.329803	-0.44182	0.122782	-0.348316	0.194343	-0.987451	-0.97383	-0.224386	0.737542	-0.53008	-0.965078	-1.80372	-1.13877	-0.109348	-0.558749	-0.84376	-0.915199	-1.79622	-0.0615269	3242	Q01813;Q01813-2	Q01813;Q01813-2	ATP-dependent 6-phosphofructokinase, platelet type	PFKP	PFKP	-0.251012	-0.48595	-0.234938
-1.41694	-1.00125	-1.38863	-1.27283	-0.900376	-1.63666	-1.35064	-1.33425	-0.480815	-0.950556	-1.63677	-1.43705	-1.57383	-1.76563	-1.34908	-1.56838	-1.04269	-1.83221	-0.866568	-0.0258123	-1.28202	-0.425666	-1.06743	-1.00305	-1.49542	-0.647689	-0.978663	-0.303566	-0.244999	-1.53783	-0.904389	-1.18015	-0.612768	-0.952581	-0.837757	-0.480281	-0.991663	-0.711988	-1.38592	-0.355231	-0.990622	931	O76031	O76031	ATP-dependent Clp protease ATP-binding subunit clpX-like, mitochondrial	CLPX	CLPX	-1.35064	-0.965622	0.385014
-0.578769	-0.460824	-0.178117	-0.601835	-0.39065	-0.505555	-0.600192	-0.58551	-0.53128	-0.122519	-0.746577	-0.692645	-0.708456	-0.345058	-0.529544	-0.987093	-0.380751	-1.15132	-0.446816	-0.0505901	-0.616112	0.0514885	-0.493585	-0.477797	-0.608869	-0.141459	-0.707957	0.148555	-0.169076	-0.558911	-0.458575	-0.619164	-0.22688	-0.0527373	-0.351195	-0.297537	-0.122403	-0.142543	-0.96755	-0.0767203	-0.567816	4064	Q16740	Q16740	ATP-dependent Clp protease proteolytic subunit, mitochondrial	CLPP	CLPP	-0.53128	-0.413784	0.117497
0.913521	1.10096	0.469784	0.568261	0.213776	0.443923	-0.0166804	0.249597	0.526444	0.361441	0.461763	0.0954767	0.279391	0.430587	0.422095	0.402416	0.697882	0.78935	0.0240878	0.0070946	0.0727842	0.129842	0.169128	0.835476	0.541351	1.06419	0.816789	0.401304	0.347851	0.331561	0.301885	0.33051	-0.040048	0.0331387	0.0421831	0.587206	0.530699	0.487476	0.16907	0.679927	0.493359	2471	P46063	P46063	ATP-dependent DNA helicase Q1	RECQL	RECQL	0.430587	0.374578	-0.0560088
0.196144	0.2224	-0.379821	-0.469132	0.0232541	-0.688295	-0.4001	-0.303948	0.176805	-0.0283897	-0.394889	-0.616362	-0.480218	-0.422966	-0.184706	-0.459839	-0.0897275	-0.182015	-0.520053	0.2296	-0.263557	0.10164	-0.363451	0.134584	-0.671633	0.101791	0.327885	0.646497	0.34194	-0.54661	-0.292856	-0.519303	-0.0745682	0.0159473	0.235389	0.113843	-0.058539	0.0623757	-0.235216	0.547528	-0.235283	3371	Q08211;Q08211-2;REV__Q7Z6J0-3	Q08211	ATP-dependent RNA helicase A	DHX9	DHX9	-0.379821	-0.0665536	0.313267
1.20836	1.23847	0.405049	0.311542	0.907902	0.685549	0.283246	0.102785	0.656675	0.232385	0.204694	0.183927	0.433625	-0.196455	0.708372	0.436746	0.880253	1.43249	0.634827	0.868132	0.490433	0.725129	1.02829	1.35813	0.154818	0.797417	0.936331	0.738285	1.32908	0.330181	0.52272	0.330105	1.05895	0.620158	1.26306	0.715871	0.759027	0.979843	0.749311	1.0687	1.08661	5773	Q92499;Q92499-2;Q92499-3	Q92499;Q92499-2;Q92499-3	ATP-dependent RNA helicase DDX1	DDX1	DDX1	0.405049	0.778222	0.373173
-1.14095	-1.08005	-2.74604	-1.91679	-0.141441	-2.08321	-1.55818	-1.05311	-0.0902839	-0.760977	-1.84924	-2.1455	-1.55618	-2.10483	-1.30899	-0.882103	-0.581747	-1.09417	-0.782899	-0.284935	-0.846338	-0.588073	-0.18577	-0.625709	-1.8193	-1.59828	-0.0943325	-0.340631	0.005269	-2.0785	-0.678285	-1.57425	-0.127322	-0.466907	0.242641	-0.102221	-1.25753	-1.01065	-1.06924	-0.406895	-0.810126	5178	Q8IY81	Q8IY81	pre-rRNA processing protein FTSJ3	FTSJ3	FTSJ3	-1.55618	-0.651997	0.904179
1.07481	0.935434	0.233925	0.0149536	0.802133	0.154306	0.229546	0.0731312	0.890744	0.430967	-0.0335844	-0.161173	0.0470476	-0.00580604	0.357447	0.263591	0.744402	0.609435	0.370004	0.795725	0.423853	0.614041	0.44128	0.642823	-0.203902	0.544824	0.94517	1.05691	0.955034	-0.0184166	0.491051	-0.147072	0.668318	0.454257	1.01019	0.824116	0.529543	0.731945	0.438798	0.959122	0.398596	5857	Q92841;Q92841-1;Q92841-3;Q92841-2	Q92841;Q92841-1;Q92841-3;Q92841-2	Probable ATP-dependent RNA helicase DDX17	DDX17	DDX17	0.229546	0.577129	0.347584
NaN	0.067116	-1.36215	-0.859999	NaN	NaN	-0.0253921	-1.04034	0.372388	-0.586773	-0.772899	NaN	NaN	-1.00359	-0.820267	-0.956031	0.0491711	0.17422	-0.316684	0.778057	-0.136933	-0.139322	0.269752	0.366638	-1.4814	-0.80304	-0.364015	0.433558	0.105164	NaN	0.657864	-0.945866	0.73672	NaN	0.871881	0.507088	-0.107435	-0.091965	NaN	0.998114	0.149239	7137	Q9H8H2;Q9H8H2-2;Q9H8H2-4	Q9H8H2;Q9H8H2-2;Q9H8H2-4	Probable ATP-dependent RNA helicase DDX31	DDX31	DDX31	-0.796583	0.105164	0.901747
-0.755912	-0.886133	-0.773008	-0.241128	-0.852355	0.0568174	-0.204549	-0.70325	-0.733899	-0.839491	-0.216349	-0.00317907	-0.190735	-0.369688	-0.817124	-0.124507	-0.395054	-0.116256	-0.499995	-1.18809	-0.683489	-1.46347	-0.541277	-0.669106	-0.00822332	-0.91432	-0.532566	-1.13988	-0.618338	-0.368269	-0.598895	-0.114249	-1.01247	-1.55978	-1.48801	-0.887789	-0.892358	-1.01095	-0.635692	-1.59712	-0.253889	7483	Q9NUU7;Q9NUU7-2	Q9NUU7;Q9NUU7-2	ATP-dependent RNA helicase DDX19A	DDX19A	DDX19A	-0.70325	-0.652399	0.0508503
NaN	-0.17878	0.127493	1.20381	NaN	0.401973	0.305429	-0.0355348	NaN	-0.0473828	-0.167731	0.0712519	-0.137193	0.352963	NaN	0.237668	-0.41166	NaN	NaN	NaN	-0.522343	-1.59671	NaN	NaN	0.562965	NaN	-0.47125	NaN	-0.991303	-0.0669618	-0.389895	-0.490033	NaN	NaN	NaN	-0.152081	-1.18501	-0.401093	-0.447253	NaN	-0.143709	8046	Q9UMR2;Q9UMR2-2;Q9UMR2-4;Q9UMR2-3	Q9UMR2;Q9UMR2-2;Q9UMR2-4;Q9UMR2-3	ATP-dependent RNA helicase DDX19B	DDX19B	DDX19B	0.0712519	-0.41166	-0.482912
-0.665096	-0.395109	-1.22846	-1.13087	-1.15884	-0.650093	-0.971478	-1.20275	-1.17213	-0.933816	-1.04852	-1.45333	-1.06211	-1.84543	-0.415233	-0.941562	-0.765602	-0.40951	-0.885646	-0.565091	-1.01642	-0.567319	-0.532075	-0.759338	-1.34414	-0.418149	-0.545597	-0.792385	-0.54017	-0.872633	-0.807567	-1.56166	-0.493385	-0.599614	-0.620148	-0.273798	-0.728543	0.165411	-0.868617	-0.267535	-0.937434	7865	Q9UHI6;Q9UHI6-2	Q9UHI6	Probable ATP-dependent RNA helicase DDX20	DDX20	DDX20	-1.06211	-0.674346	0.387766
-2.09321	-1.86596	-2.76944	-2.44416	-1.95342	-2.42199	-2.6669	-2.42169	-1.58059	-1.78513	-2.63049	-3.20733	-2.59445	-3.4842	-2.46343	-2.64716	-1.97263	-2.4913	-2.2481	-0.932588	-2.05944	-1.28459	-1.89994	-1.89161	-2.42781	-1.84893	-1.40802	-0.953135	-1.20039	-2.93745	-2.0037	-2.85011	-1.53302	-1.62891	-1.3347	-1.59151	-1.73957	-1.78684	-2.26756	-0.960617	-2.24305	7368	Q9NR30;Q9NR30-2	Q9NR30;Q9NR30-2	Nucleolar RNA helicase 2	DDX21	DDX21	-2.44416	-1.87027	0.573891
0.305188	0.276944	-0.182284	-0.138532	0.556067	-0.327543	-0.181003	-0.17936	0.410355	0.115956	-0.0571721	-0.400786	-0.218743	-0.224065	-0.00968686	-0.271093	0.121539	-0.0659806	0.0570535	0.491987	0.0846248	0.222434	-0.123702	0.271	-0.345855	0.19542	0.584781	0.801813	0.693777	-0.188176	-0.0572254	-0.48279	0.57153	0.196463	0.379758	0.401732	0.149414	0.261975	0.0172045	0.671546	-0.165254	6701	Q9BUQ8	Q9BUQ8	Probable ATP-dependent RNA helicase DDX23	DDX23	DDX23	-0.138532	0.172417	0.31095
-1.06511	-0.926302	-1.43692	-1.27041	-1.33402	-1.15881	-1.66707	-1.24262	-0.44225	-0.812476	-1.27237	-1.94674	-1.41632	-1.07696	-1.62971	-1.0886	-0.69482	-1.15853	-1.96336	-0.502494	-1.31792	-0.535779	-1.50289	-0.549986	-1.4221	-1.14841	-0.826486	-0.428432	-0.760626	-1.60756	-1.09384	-1.5353	-1.38347	-0.607427	-0.324812	-0.26213	-1.08756	-0.861186	-0.927601	-0.487682	-1.13229	6902	Q9GZR7;Q9GZR7-2	Q9GZR7;Q9GZR7-2	ATP-dependent RNA helicase DDX24	DDX24	DDX24	-1.27041	-1.00758	0.26283
-1.16272	-0.774349	-2.45119	-1.8653	-0.370861	-1.44514	-1.79174	-1.70457	0.0099479	-0.98178	NaN	-2.48651	-1.72166	-1.73326	-1.48071	-0.942023	-0.482772	-0.690744	-1.38929	-0.235401	-0.975581	-0.586005	-0.657934	-0.432642	-1.69766	-1.38467	-0.0577355	-0.144869	-0.206879	-2.05631	-0.702344	-1.29447	-0.236664	-0.880914	0.295055	0.0563915	-1.23867	-0.866671	-1.05062	-0.249661	-0.965234	7176	Q9H9Y2	Q9H9Y2	Ribosome production factor 1	RPF1	RPF1	-1.59264	-0.696544	0.896097
NaN	-0.488475	-0.802389	NaN	NaN	NaN	-1.98544	NaN	0.886913	NaN	-0.615447	-0.925775	NaN	-0.985887	NaN	-1.14692	-0.0137319	2.18988	0.0375142	NaN	-0.559923	NaN	-0.204672	0.64649	-0.699325	0.520536	1.88002	1.10883	-0.193184	-1.22667	NaN	NaN	0.413376	0.255926	1.37685	-0.20368	-0.406054	0.146071	NaN	NaN	0.299881	3666	Q13950-2;Q13950	Q13950-2;Q13950	Runt-related transcription factor 2	RUNX2	RUNX2	-0.802389	0.0917928	0.894182
-0.888566	-1.08439	-1.86595	-1.70783	-0.433961	-1.03086	-1.77467	-1.59775	-0.211999	-1.04392	-1.74046	-1.6447	-1.52735	-2.34258	-1.15519	-1.19549	-0.552321	-0.979611	-0.576407	0.091554	-0.758232	-0.388081	-0.354344	-0.607541	-1.62119	-0.90057	-0.484358	0.0969865	-0.0653739	-1.58203	-0.892634	-1.49191	-0.186481	-0.800565	-0.188911	-0.269004	-0.802693	-0.680337	-1.11732	-0.372761	-0.968155	6933	Q9H0A0;Q9H0A0-2	Q9H0A0;Q9H0A0-2	N-acetyltransferase 10	NAT10	NAT10	-1.52735	-0.643939	0.883414
-0.113297	-0.421342	0.113875	-0.238676	-0.902738	0.398165	-0.187616	0.000666964	-0.590474	-0.104532	-0.111396	-0.153299	0.0146878	-0.403058	-0.283332	-0.497946	-0.838079	-0.259997	0.531998	0.22725	-0.546705	0.189826	-0.491092	-0.474548	-0.0218172	-0.0293458	-0.512888	-0.334753	-0.536823	0.0506646	-0.759898	-0.481882	-0.340287	-0.14227	-0.167819	-0.761691	0.0459507	-0.063782	-0.618778	-0.347178	-0.211376	4875	Q7Z478	Q7Z478	ATP-dependent RNA helicase DHX29	DHX29	DHX29	-0.153299	-0.33752	-0.184221
-0.114801	-0.0406341	-0.556546	-0.376398	0.0222659	0.109492	-0.667086	0.0539238	0.159405	-0.213393	-0.239536	-0.431326	-0.188734	-0.530032	-0.252061	0.317202	-0.0573897	0.0275537	-0.378765	0.176546	-0.42752	-0.0832821	-0.0502866	-0.462212	-0.485078	-0.200042	-0.322385	-0.183693	0.679937	-0.0950567	0.131114	-0.280858	0.128872	-0.260308	-0.0202514	-0.0587469	-0.355214	0.155762	0.16845	-0.141452	-0.0935971	7011	Q9H2U1-2;Q9H2U1;Q9H2U1-3	Q9H2U1-2;Q9H2U1;Q9H2U1-3	ATP-dependent RNA helicase DHX36	DHX36	DHX36	-0.213393	-0.0884396	0.124954
-0.0394078	0.0340973	-0.23617	-0.280147	-0.0620728	-0.664131	0.0466691	-0.315039	0.445407	0.126531	-0.329704	-0.330878	-0.427601	-0.036846	-0.197444	-0.213073	0.027285	0.0130265	-0.269789	0.121713	0.0643097	0.161915	-0.442048	0.37402	-0.332894	0.176166	0.762392	0.537067	0.188612	-0.146031	0.0132927	-0.275927	-0.0835191	-0.173683	0.569284	0.135971	0.222148	0.21149	-0.469203	0.396806	-0.413641	3762	Q14562	Q14562	ATP-dependent RNA helicase DHX8	DHX8	DHX8	-0.197444	0.0457974	0.243241
-0.728272	-0.603268	-0.989006	-1.31151	-0.84884	-1.15128	-0.640722	-1.23458	-0.57728	-0.618009	-0.75553	-0.904881	-1.22763	-1.16327	-1.17842	-1.50165	-1.31467	-1.33947	-1.20413	-0.103855	-1.02376	-0.362111	-1.27207	-0.907823	-0.672731	-0.413264	-1.22115	-0.461676	-0.50276	-1.23389	-1.2011	-0.822374	-0.822613	-0.3977	-0.805676	-0.796058	-0.380855	-0.646405	-1.38745	-0.332574	-1.50799	6438	Q96TA2-3;Q96TA2-2;Q96TA2	Q96TA2-3;Q96TA2-2;Q96TA2	ATP-dependent zinc metalloprotease YME1L1	YME1L1	YME1L1	-0.904881	-0.822493	0.0823879
0.593677	0.710544	0.159655	-0.136988	0.997547	-0.441622	0.0590865	0.196979	0.824966	0.542348	-0.0817581	-0.21615	-0.159695	-0.0711258	0.157091	0.00504192	0.525553	0.409503	0.0192465	0.546439	0.4197	0.376553	0.13264	0.852714	-0.0827858	0.612457	0.881993	0.782402	0.967624	0.00739295	0.292662	-0.239282	0.29632	0.260962	0.734624	0.586632	0.301394	0.439436	0.291741	0.843076	0.197596	329	O14497;O14497-2;O14497-3	O14497;O14497-2;O14497-3	AT-rich interactive domain-containing protein 1A	ARID1A	ARID1A	0.157091	0.393028	0.235937
-0.607356	-0.666739	-2.37692	-2.28094	-1.01653	-0.947256	-2.767	-1.81459	-0.105204	-1.18241	-1.77632	-2.11731	-1.76021	NaN	-1.47688	-1.41318	-0.494453	-1.02411	-0.912262	0.185321	-0.962014	-0.660866	-0.828875	-0.686801	-2.65411	-1.23374	-0.541817	-0.0378722	-0.716014	-2.08067	-0.769635	-2.23353	-0.454384	-0.998696	-0.14733	-0.0728836	-1.05622	-0.437247	-1.10237	-0.215669	-0.582228	6563	Q9BQ75-2;Q9BQ75;Q14011-3	Q9BQ75-2;Q9BQ75	Protein CMSS1	CMSS1	CMSS1	-1.61855	-0.742825	0.875722
0.0233849	0.268249	-0.721929	-0.962537	-0.0402882	-0.439139	-0.390352	-0.612436	0.696359	-0.123036	-0.389263	-0.83936	-0.49938	-0.739874	-0.343215	-0.351622	0.0590707	-0.0576214	-0.240091	0.320399	-0.209835	-0.00388374	-0.931577	-0.0391132	-0.987042	0.134186	0.458669	0.271339	0.71852	-0.469533	0.0714803	-0.94633	0.329526	-0.280239	0.118773	0.398883	-0.173816	0.121247	0.0367275	0.302922	-0.542554	4467	Q68CP9-3;Q68CP9	Q68CP9-3;Q68CP9	AT-rich interactive domain-containing protein 2	ARID2	ARID2	-0.390352	0.0164219	0.406774
-1.56183	-0.793983	-0.999711	-1.13763	-1.10643	-2.97554	-1.31694	-0.408408	-0.91439	-0.578758	-0.638069	-1.75556	-1.64698	-0.957032	-1.12863	-0.815491	-1.00211	-2.2307	NaN	-1.31995	-0.971426	-0.900989	-2.14984	-1.51281	-1.35969	-0.799333	-1.85074	-0.376506	-1.43646	-1.16589	-1.45352	-0.961108	-2.03746	-0.655686	-1.58483	-1.27123	-1.11337	-0.979996	-1.29863	-1.02214	-1.41621	6527	Q99856;A6NKF2;Q8IVW6-3;Q8IVW6-4;Q8IVW6	Q99856	AT-rich interactive domain-containing protein 3A	ARID3A	ARID3A	-1.10643	-1.27123	-0.164795
0.98648	1.21475	0.356455	-0.0274998	0.603315	0.17798	NaN	-0.342447	0.837073	NaN	NaN	-0.194362	NaN	0.312638	0.729588	0.441183	0.57163	1.0571	0.0488096	0.838501	NaN	0.0434962	0.414012	0.919636	0.128774	0.74823	-0.191098	0.567239	-0.414378	NaN	1.02849	-0.613561	1.22332	0.288408	1.21801	1.20448	0.876081	-0.162127	NaN	0.767695	1.05229	2107	P29374-3;P29374-2;P29374	P29374-3;P29374-2;P29374	AT-rich interactive domain-containing protein 4A	ARID4A	ARID4A	0.356455	0.57163	0.215175
0.568535	1.57223	NaN	NaN	-1.79525	NaN	NaN	NaN	0.906346	0.17268	NaN	NaN	NaN	NaN	NaN	NaN	0.851222	-0.198582	-0.0847057	0.956222	NaN	0.70105	-0.686973	0.497354	-0.256443	NaN	1.22096	0.998445	1.08246	NaN	0.675526	-1.14874	0.480492	NaN	NaN	0.641579	NaN	0.52067	0.452577	NaN	0.227897	4188	Q4LE39-2;Q4LE39;Q4LE39-3;Q4LE39-4	Q4LE39-2;Q4LE39;Q4LE39-3;Q4LE39-4	AT-rich interactive domain-containing protein 4B	ARID4B	ARID4B	0.568535	0.509012	-0.059523
NaN	-0.683735	0.0594107	-1.17393	NaN	-1.55285	-0.0960478	-0.170744	NaN	-0.410103	NaN	-0.164888	-0.876481	-0.0882993	NaN	-1.49451	NaN	NaN	-0.892703	-0.408439	NaN	NaN	NaN	NaN	NaN	-2.49375	NaN	NaN	NaN	-0.702167	-0.919901	-1.51123	-1.27365	-0.484673	NaN	-0.562124	-0.0144043	NaN	NaN	-0.688069	NaN	906	O75882;O75882-3;O75882-2	O75882;O75882-3;O75882-2	Attractin	ATRN	ATRN	-0.290423	-0.797435	-0.507011
NaN	NaN	NaN	0.595915	NaN	0.505858	NaN	-0.27114	-1.35275	NaN	0.398867	0.186363	0.176769	0.276674	-0.0309683	NaN	-0.0765742	0.00901615	0.0985671	NaN	-0.823966	NaN	-0.595944	NaN	0.310808	NaN	NaN	NaN	-0.538033	0.0497818	0.438854	0.0277854	-0.489425	-0.0695854	0.0817521	-0.865746	-1.14197	-0.750979	0.104642	NaN	0.182769	6988	Q9H1Y0;Q9H1Y0-2	Q9H1Y0	Autophagy protein 5	ATG5	ATG5	0.186363	-0.0302846	-0.216648
NaN	-0.401743	0.014001	-0.586312	-1.53312	0.419437	0.653711	-0.113615	-0.41637	0.703307	-0.496645	-0.100062	-0.437147	0.0757258	-0.750809	-0.919514	-0.57937	-0.740111	-0.199251	-0.420597	-1.81766	0.00612838	-1.26485	0.376926	0.356057	-0.80354	-0.825694	0.0719664	NaN	-0.594385	-1.14578	0.703272	-1.0846	NaN	0.884251	-0.758824	0.502127	-0.0374188	-0.601066	NaN	-0.719015	4858	Q7Z3C6;Q7Z3C6-2;Q7Z3C6-3	Q7Z3C6;Q7Z3C6-2	Autophagy-related protein 9A	ATG9A	ATG9A	-0.257679	-0.594385	-0.336706
1.7313	2.02277	0.142704	2.47588	-1.82352	-0.886207	2.29967	2.43684	0.227384	1.74124	1.16866	1.44349	1.7209	1.5886	5.43431	2.39974	-0.378611	-1.04251	-1.87001	1.29276	4.41889	2.82105	NaN	-1.45659	-2.62919	1.53503	-1.38271	-0.499212	-0.00680631	2.20281	0.0459772	0.452889	0.860084	5.80077	1.50684	0.170166	2.55926	0.750792	6.20209	0.885041	-1.41469	1868	P20160	P20160	Azurocidin	AZU1	AZU1	1.7209	0.750792	-0.970105
4.99825	3.50221	NaN	2.47664	2.21482	NaN	3.12892	3.60489	NaN	4.24907	NaN	1.53773	4.38558	3.00651	4.63425	3.80837	3.95821	NaN	NaN	NaN	4.45931	4.18167	NaN	NaN	NaN	4.28031	NaN	NaN	4.13489	3.54729	4.01571	2.88634	NaN	4.92228	3.43638	NaN	3.55261	3.04888	5.43228	NaN	NaN	1776	P17213	P17213	Bactericidal permeability-increasing protein	BPI	BPI	3.50221	3.98696	0.484754
-1.23954	-0.935322	-2.70579	-1.8143	-0.794127	-1.87672	-2.08375	-1.64996	-0.500071	-1.21507	-1.92834	-2.27803	-1.58612	-2.37901	-1.73605	-1.42285	-0.784471	-1.14804	-1.4765	-0.374146	-1.05546	-0.78757	-0.499178	-0.833655	-1.95502	-1.33468	-0.856545	-0.379216	-0.307894	-2.16637	-0.905639	-1.83068	-0.365573	-0.856809	-0.263628	-0.497812	-1.33306	-1.15223	-0.864019	-0.213342	-1.29604	3107	P78316;P78316-2	P78316;P78316-2	Nucleolar protein 14	NOP14	NOP14	-1.73605	-0.860414	0.875633
-0.860428	-0.560063	0.0156475	0.156282	-0.496204	0.0398291	-0.288483	-0.289447	-0.574847	-0.236439	0.203817	-0.168155	-0.0769466	-0.0705552	-0.501516	-0.271431	-0.516887	-0.630842	-0.565178	-0.811954	-0.504757	-0.450523	-0.115138	-0.54104	0.0963935	-0.516838	-0.476345	-1.07449	-0.81741	-0.116234	-0.047304	0.219504	-0.713957	-0.0934127	-1.00969	-0.955342	-0.592212	-0.0910865	-0.453352	-0.792284	-0.481527	7364	Q9NR09;REV__Q96C03;REV__Q96C03-3	Q9NR09	Baculoviral IAP repeat-containing protein 6	BIRC6	BIRC6	-0.236439	-0.510797	-0.274358
0.190215	-0.185624	-0.786228	-0.0179796	-0.00302769	-0.912246	-0.668506	-0.725544	0.0214358	-1.00935	NaN	-0.53017	0.064331	-0.753541	-0.229986	-0.0897148	0.164567	NaN	-0.99621	NaN	-0.438688	-0.912319	-0.215007	-0.174816	-0.319559	-1.01508	0.151586	-0.394069	-0.000942163	-0.293806	-0.0594658	-0.0485528	0.149686	-0.537634	-0.115287	0.149738	-1.09136	-0.887336	-0.0821109	-0.199865	0.122892	6530	Q99933-4;Q99933-3;Q99933;Q99933-2	Q99933-4;Q99933-3;Q99933;Q99933-2	BAG family molecular chaperone regulator 1	BAG1	BAG1	-0.380078	-0.187341	0.192737
-1.7736	-2.1539	-3.02549	-2.85651	-3.62438	-1.40601	-5.34606	-3.36165	-4.60853	-3.42636	-3.39657	-2.97026	-3.04903	-2.8887	-2.90132	-4.41331	-4.41759	-2.37715	-1.35259	-0.266577	-3.59026	-2.15768	-3.0372	-3.47068	-3.67216	-2.66163	NaN	-2.14809	-1.8348	-2.34055	-5.01277	-6.24444	-0.629501	-1.73702	-2.54148	-4.57762	-2.33368	-1.70191	-1.53845	-1.60826	-3.51954	1106	O95816;O95816-2	O95816;O95816-2	BAG family molecular chaperone regulator 2	BAG2	BAG2	-3.02549	-2.37715	0.648344
-0.264628	-0.396657	-0.359663	-0.205467	-0.995497	-0.543957	0.426742	0.438361	-0.310866	NaN	-0.151085	0.134203	-0.406719	-0.542874	-0.00142596	NaN	-0.639743	-0.375971	NaN	-0.793865	NaN	-0.611633	-0.313447	-0.402831	0.111192	-0.165522	-0.603238	NaN	-0.76047	0.0504238	-0.414047	0.290639	0.0458738	NaN	-0.594567	NaN	-0.543	-0.12037	0.00507267	-0.458641	-0.285602	1053	O95429-2;O95429	O95429-2;O95429	BAG family molecular chaperone regulator 4	BAG4	BAG4	-0.287747	-0.389401	-0.101654
0.592052	0.373051	NaN	0.325223	-0.0586063	0.925247	0.293675	0.542608	0.0565417	0.35723	0.381086	0.285508	0.370628	0.270618	0.0535144	0.376521	0.186794	0.418958	0.671355	-0.517501	0.0326675	NaN	0.862751	0.182753	0.570983	0.098415	0.182982	0.144183	0.356722	0.0313411	0.301331	-0.0569302	-0.0951755	0.205582	0.503663	0.15985	0.178892	-0.384707	0.265929	-0.00196397	-0.00585708	7996	Q9UL15;Q9UL15-2	Q9UL15;Q9UL15-2	BAG family molecular chaperone regulator 5	BAG5	BAG5	0.341226	0.182753	-0.158473
-1.70747	-1.28314	-2.07217	-1.42657	-1.98121	-0.601757	-2.78649	-1.7973	-1.64774	-1.84216	-2.1542	-1.98919	-1.21194	-1.87635	-1.38748	-2.81032	-1.11374	-0.855451	-0.719814	-0.486943	-1.18054	-0.634338	-0.595944	-0.952703	-1.82285	-0.893601	-1.24632	-0.218105	-0.306556	-2.02606	-2.67494	-1.30366	-0.760643	-0.554337	-0.620082	-1.79616	-1.17643	-2.33121	-1.48226	-0.201442	-0.77712	2519	P48449;P48449-3;P48449-2	P48449;P48449-3;P48449-2	Lanosterol synthase	LSS	LSS	-1.7973	-0.923152	0.874149
-2.9949	-1.61529	-1.03255	-1.5312	-1.60485	-2.07479	-1.76663	-1.721	-1.21308	-1.62685	-0.94094	-1.24833	-1.75973	-1.292	-2.81372	-0.95866	-1.1613	-2.50546	-2.17285	-0.954006	-3.73248	-2.00248	-1.9679	-0.300368	-2.43702	-1.72319	-1.10786	-0.0936882	-5.60466	-1.02354	-1.19649	-5.22625	-0.434916	-1.41344	-0.861059	-0.646252	-1.43761	-1.11367	-2.36267	-1.71922	-2.68473	565	O43491;O43491-2;O43491-3	O43491;O43491-2;O43491-3	Band 4.1-like protein 2	EPB41L2	EPB41L2	-1.61529	-1.42553	0.189762
NaN	-1.47604	1.31329	1.21644	-1.76173	NaN	-1.13951	-2.25796	-4.15566	-1.5413	0.847758	-0.495595	0.014451	0.310867	-1.15021	-4.27398	-3.78665	-3.0901	-4.10927	-1.30498	-2.33642	-0.241619	-0.1293	-2.67771	-1.65538	-0.314927	-3.52598	-1.51478	-2.15408	0.741449	-4.80053	-1.11265	NaN	NaN	-1.13484	-3.18484	-0.40617	-0.228467	-0.434529	NaN	-3.56979	8183	Q9Y2J2-2;Q9Y2J2-4;Q9Y2J2;Q9Y2J2-3	Q9Y2J2-2;Q9Y2J2-4;Q9Y2J2;Q9Y2J2-3	Band 4.1-like protein 3;Band 4.1-like protein 3, N-terminally processed	EPB41L3	EPB41L3	-1.13951	-1.65538	-0.515874
0.411785	0.78852	-0.211914	0.19538	-0.000723791	0.205837	0.29902	-0.267454	0.199669	-0.247817	0.136096	0.148901	0.0216431	-0.15397	-0.0987332	0.368322	0.182645	0.802678	-0.121576	-0.42279	0.242728	-0.368371	0.330171	0.693714	0.0643655	0.148153	0.108253	0.192901	-0.0200599	0.0460481	0.272492	0.416839	0.060053	-0.150088	-0.517786	-0.0168344	0.22409	-0.140875	0.11911	-0.0433702	0.435189	853	O75531	O75531	Barrier-to-autointegration factor;Barrier-to-autointegration factor, N-terminally processed	BANF1	BANF1	0.136096	0.113682	-0.0224143
-0.526313	-0.718148	-0.391132	-0.326703	-0.947606	-0.40976	-0.137896	-0.0384331	-1.33994	-0.738666	-0.000937778	-0.310268	-0.384532	-0.546094	-0.791743	-0.603361	-0.850725	-0.167992	-0.779077	-1.02632	-0.823516	-1.37006	-0.891643	-1.16456	-0.00925286	-0.785529	-0.742502	-1.03931	-0.700136	-0.339249	-0.807807	-0.240673	-1.21334	-1.10862	-1.19813	-1.19048	-0.778483	-0.688835	-0.90057	-1.16428	-0.577096	4798	Q7L1Q6;Q7L1Q6-4;Q7L1Q6-3;Q7L1Q6-2	Q7L1Q6;Q7L1Q6-4;Q7L1Q6-3;Q7L1Q6-2	Basic leucine zipper and W2 domain-containing protein 1	BZW1	BZW1	-0.40976	-0.815661	-0.405901
-1.2804	-1.50312	-2.13729	-1.43561	-1.393	-0.69375	-1.04896	-1.21736	-1.28051	-1.16389	-1.19441	-1.07764	-1.06936	-1.63936	-1.06225	-0.781719	-0.969679	-1.2397	-0.846812	-0.97119	-1.06698	-1.92718	-0.423262	-1.4719	-1.22073	-1.36879	-0.986163	-1.41271	-0.925438	-0.94776	-0.86598	-0.979862	-0.963523	-2.30015	-1.25057	-1.18625	-1.29455	-1.37963	-1.23084	-1.79736	-0.359682	8429	Q9Y6E2;Q9Y6E2-2	Q9Y6E2	Basic leucine zipper and W2 domain-containing protein 2	BZW2	BZW2	-1.21736	-1.12661	0.0907466
-2.08113	-2.0655	-1.37172	-1.63219	-3.05364	-2.54185	-1.68774	-2.09946	-4.10538	-1.40157	-1.55386	-1.69965	-2.59434	-0.917067	-1.84659	-3.56937	-3.51972	-2.76559	-2.56687	-1.57764	-2.56871	-1.12643	-2.9128	-2.68918	-1.71254	-2.03575	-3.12781	-1.46712	-2.62934	-2.42794	-3.63964	-2.6905	-2.30596	-0.813266	-1.53835	-3.37609	-1.12731	-1.74797	-1.72344	-1.23613	-3.03696	2289	P35613-2;P35613;P35613-4;P35613-3	P35613-2;P35613;P35613-4;P35613-3	Basigin	BSG	BSG	-1.84659	-2.4974	-0.650815
NaN	NaN	0.343768	NaN	0.385476	NaN	NaN	0.688222	NaN	NaN	NaN	-0.192738	NaN	-0.521114	NaN	0.100166	0.0247566	NaN	-0.436005	0.352956	0.110949	NaN	NaN	-0.453816	NaN	0.540383	NaN	NaN	NaN	NaN	NaN	NaN	-0.109697	NaN	NaN	0.493431	0.844278	-0.490822	NaN	NaN	1.07574	3535	Q13286-4;Q13286-2;Q13286-3;Q13286;Q13286-5;Q13286-7;Q13286-6	Q13286-4;Q13286-2;Q13286-3;Q13286;Q13286-5;Q13286-7;Q13286-6	Battenin	CLN3	CLN3	0.343768	0.105558	-0.238211
1.35711	1.54651	1.9315	1.18867	1.45778	1.08134	1.92294	2.17569	2.30219	2.07398	1.49106	1.17963	1.11145	1.5226	2.31527	1.62111	1.56783	1.21226	1.0594	1.76021	1.54304	2.18828	0.953496	1.45743	1.14205	2.76884	1.56468	1.51499	1.28233	1.62149	1.67835	1.4072	1.31265	2.09951	1.40831	1.83178	2.25286	2.11989	1.75835	0.928663	0.783545	2825	P55061;P55061-2	P55061;P55061-2	Bax inhibitor 1	TMBIM6	TMBIM6	1.5226	1.55386	0.0312607
NaN	-0.0722668	NaN	-0.315273	0.718931	NaN	-0.63191	0.168779	NaN	0.00217992	NaN	NaN	NaN	-0.432409	0.0852515	-0.247635	-0.122591	-0.147	-0.242558	0.138152	-0.138226	-0.0368365	NaN	0.255959	-0.495726	0.582467	0.511814	0.820263	NaN	-0.408873	-0.330299	-0.356767	1.10742	NaN	NaN	NaN	NaN	NaN	NaN	NaN	-0.287675	6575	Q9BQE9;Q9BQE9-4;Q9BQE9-2;Q9BQE9-3	Q9BQE9;Q9BQE9-4;Q9BQE9-2;Q9BQE9-3	B-cell CLL/lymphoma 7 protein family member B	BCL7B	BCL7B	-0.0350435	-0.138226	-0.103183
NaN	0.801115	0.786076	0.177406	NaN	NaN	0.310666	NaN	1.25021	NaN	0.186674	0.792482	0.350711	0.695074	2.21737	NaN	NaN	NaN	0.0341376	0.162105	1.26028	0.940874	0.209468	1.46137	NaN	1.37684	0.980687	1.66766	0.674344	0.377344	0.809687	NaN	NaN	NaN	NaN	NaN	1.2022	2.24255	NaN	NaN	0.66214	5691	Q8WUZ0;Q8WUZ0-2	Q8WUZ0;Q8WUZ0-2	B-cell CLL/lymphoma 7 protein family member C	BCL7C	BCL7C	0.740575	0.940874	0.200299
NaN	0.615014	NaN	0.0815682	-0.692592	0.372067	NaN	0.599356	1.1952	0.291124	0.36147	0.522663	0.0791288	-0.496238	0.523203	NaN	-0.434499	NaN	0.0568319	-0.0520867	NaN	0.780747	-0.532439	0.85387	-0.142168	0.999857	-0.561668	-0.101061	0.0509882	0.0765502	0.816542	-0.132864	0.105484	NaN	-0.127584	0.0513355	0.814801	NaN	NaN	NaN	0.659423	7874	Q9UHQ4;Q9UHQ4-2	Q9UHQ4;Q9UHQ4-2	B-cell receptor-associated protein 29	BCAP29	BCAP29	0.366768	0.0513355	-0.315433
-0.119575	0.394127	0.242596	0.208667	0.471673	0.288194	0.0723603	0.191034	0.458764	0.201313	0.202064	0.176003	0.138039	0.157186	0.730149	0.191868	-0.0207704	0.668504	0.373834	0.840739	0.309363	0.674442	0.243626	0.424227	-0.173296	0.536734	0.083783	0.58895	0.103197	-0.107712	0.172305	0.22848	0.557012	0.877689	0.494038	-0.00806126	0.777933	0.524703	0.254764	0.437575	0.0329091	2680	P51572;P51572-2	P51572;P51572-2	B-cell receptor-associated protein 31	BCAP31	BCAP31	0.202064	0.341598	0.139534
2.47676	1.01762	1.19143	1.52951	2.42336	0.634939	2.13542	1.6306	2.30933	2.09142	1.60347	0.900815	NaN	1.05631	2.19937	0.510348	2.41639	NaN	1.12588	2.79943	1.1554	2.02015	2.75137	1.66757	1.46341	0.179608	2.18683	1.75574	2.58339	0.575871	1.79932	1.8981	2.01272	1.67416	2.24888	0.664349	2.50137	2.76547	1.98423	1.68752	2.09703	6285	Q96LW7-2	Q96LW7-2	Bcl10-interacting CARD protein	C9orf89	C9orf89	1.61704	1.8981	0.281065
NaN	-0.0917358	0.19087	0.133971	0.783986	-0.69576	-0.538757	0.363228	0.852561	0.697328	-0.321791	0.316793	0.0579508	0.126674	0.113061	-0.266528	0.417972	-0.0908877	0.0347753	0.593366	0.0396885	0.0778805	0.359952	-0.0722319	-0.153383	0.409745	0.0130175	-0.306962	0.0239055	0.262613	0.0819348	0.528059	0.406055	0.145688	0.451563	0.323788	0.304084	0.366023	-0.255736	0.300665	-0.119652	4043	Q16611;Q16611-2	Q16611;Q16611-2	Bcl-2 homologous antagonist/killer	BAK1	BAK1	0.130323	0.113811	-0.0165115
-0.0277168	0.0873166	-0.471986	-0.497625	0.179229	-0.581489	-0.611577	-0.465168	0.368857	-0.0346352	-0.481133	-0.593198	-0.586238	-0.529056	-0.294031	-0.339158	0.0319133	-0.0431008	-0.133578	0.232814	-0.13074	0.238885	-0.221265	-0.162418	-0.702359	0.0120413	0.141429	0.417268	0.353891	-0.440934	-0.0868362	-0.6324	0.347495	-0.142837	0.2713	0.0857144	-0.169978	0.05821	-0.378786	0.686407	-0.0804955	7616	Q9NYF8-2;Q9NYF8	Q9NYF8-2;Q9NYF8	Bcl-2-associated transcription factor 1	BCLAF1	BCLAF1	-0.471986	-0.0617981	0.410188
-0.0181223	0.493007	1.14142	1.10521	-0.314904	0.0611609	0.258929	0.771829	-0.46524	1.36158	0.334196	0.601192	0.693313	1.57206	1.28324	0.352718	0.285058	0.49601	0.230069	0.35996	0.179632	1.12152	0.652495	0.0233871	0.373014	0.489111	-0.375981	0.0189655	-0.553474	0.724586	0.421786	0.832128	0.389331	-0.0218514	0.0571882	-0.211112	0.722736	0.577357	-0.0288078	-0.198285	0.699469	6787	Q9BXK5;Q9BXK5-2;Q9BXK5-4	Q9BXK5;Q9BXK5-2	Bcl-2-like protein 13	BCL2L13	BCL2L13	0.601192	0.356339	-0.244853
NaN	NaN	0.207893	NaN	NaN	NaN	0.118819	0.63808	-0.283762	0.256068	0.0831636	-0.00410015	NaN	0.0131677	-0.0960877	0.23506	-0.4298	NaN	-0.424092	-0.0976662	0.16327	-0.238549	-0.0305005	-0.567598	NaN	0.116364	-0.470229	-0.295295	-0.493258	0.261452	0.308551	0.180227	-0.560665	NaN	NaN	NaN	-0.633937	-0.323792	NaN	NaN	-0.00293138	3749	Q14457	Q14457	Beclin-1	BECN1	BECN1	0.0831636	-0.238549	-0.321713
NaN	-0.34449	-0.493027	NaN	1.50745	-0.681632	NaN	-1.93056	0.123103	0.404167	-1.50603	NaN	NaN	NaN	NaN	-0.709402	-0.360412	-0.290326	-0.455096	NaN	-0.625324	NaN	-1.02977	-0.355192	-1.04964	NaN	-1.34427	-0.118027	0.141392	-1.39681	-0.418717	-1.31646	-0.580732	NaN	-0.724982	-0.135979	-1.31796	NaN	NaN	NaN	NaN	4356	Q5T5X7	Q5T5X7	BEN domain-containing protein 3	BEND3	BEND3	-0.418759	-0.603028	-0.18427
-0.668578	-0.131573	0.416099	NaN	NaN	NaN	0.165796	NaN	NaN	NaN	NaN	-0.436775	NaN	0.0578338	-0.0333347	-0.49854	0.465908	-0.233386	0.811931	0.318161	-0.039425	0.0330031	-0.286611	NaN	-0.0684532	NaN	-0.200551	0.391734	0.188371	-0.0982427	NaN	-0.255894	NaN	NaN	-0.0474362	1.28168	0.217113	NaN	NaN	NaN	NaN	444	O15155;O15155-2	O15155;O15155-2	BET1 homolog	BET1	BET1	-0.0333347	-0.039425	-0.00609023
-0.677855	-0.620642	NaN	NaN	NaN	-0.736747	-0.624188	-0.891318	-0.379773	0.260233	-0.902029	NaN	-0.726511	-1.03924	-0.684491	-1.03454	-0.430144	-0.107417	-0.261032	0.382957	-0.448608	-0.0368365	-0.335551	-0.0663518	-1.15606	0.276583	-0.680639	-0.171675	0.301731	-0.288676	-0.120029	0.19666	0.271969	NaN	NaN	-0.350169	-0.220564	-0.580867	NaN	NaN	-0.456639	6269	Q96L58	Q96L58	Beta-1,3-galactosyltransferase 6	B3GALT6	B3GALT6	-0.684491	-0.240798	0.443694
0.552663	1.07543	NaN	NaN	0.992099	NaN	1.10112	0.66632	1.00247	0.792286	NaN	NaN	0.0633015	NaN	NaN	NaN	NaN	NaN	NaN	0.939315	NaN	NaN	NaN	1.53277	0.515243	NaN	0.934279	NaN	NaN	NaN	1.18632	NaN	1.63669	NaN	NaN	0.863576	NaN	0.497191	0.502971	NaN	NaN	4698	Q6Y288	Q6Y288	Beta-1,3-glucosyltransferase	B3GALTL	B3GALTL	0.892193	0.934279	0.0420862
NaN	0.645338	0.601451	-0.0559184	0.126478	0.552804	0.264728	0.535009	0.0170844	0.894504	0.358242	0.193504	-0.103861	0.578295	0.00344283	-0.301891	-0.963912	NaN	NaN	-0.151119	-0.113757	NaN	-2.11743	0.152305	0.112926	0.602215	-1.05507	NaN	-0.645477	0.589774	-0.150108	-0.167608	-0.836721	0.924834	-0.375277	-0.182032	0.601144	0.469485	0.611694	0.442704	-0.786908	1712	P15291-2;P15291	P15291-2;P15291	Beta-1,4-galactosyltransferase 1;Lactose synthase A protein;N-acetyllactosamine synthase;Beta-N-acetylglucosaminylglycopeptide beta-1,4-galactosyltransferase;Beta-N-acetylglucosaminyl-glycolipid beta-1,4-galactosyltransferase;Processed beta-1,4-galactosyltransferase 1	B4GALT1	B4GALT1	0.311485	-0.150613	-0.462098
NaN	NaN	NaN	NaN	NaN	1.12035	0.477274	NaN	-1.45826	NaN	NaN	-0.486992	-0.546033	NaN	0.130206	NaN	NaN	NaN	NaN	-0.248216	NaN	0.501011	NaN	NaN	NaN	0.609226	NaN	NaN	-1.0385	NaN	NaN	-0.193161	NaN	1.38622	NaN	NaN	NaN	NaN	0.863489	NaN	NaN	528	O43286	O43286	Beta-1,4-galactosyltransferase 5	B4GALT5	B4GALT5	-0.178393	0.501011	0.679404
-0.189661	0.56347	0.973276	0.210994	-0.45486	0.0300283	0.448176	0.203837	-0.92028	0.480738	0.276495	0.423469	-0.00932524	0.496702	0.132388	-0.350493	-0.880729	0.554199	0.804478	-0.329459	-0.1431	0.520564	-0.47882	0.602477	0.232479	0.448599	0.203351	-0.222265	-1.48958	0.314322	-0.589785	0.0382025	-0.231843	0.0855463	-0.00326863	-0.87996	0.441869	0.326968	-0.376339	0.0262711	-0.0690183	3657	Q13884;Q13884-2;Q13424-2;Q13424	Q13884;Q13884-2	Beta-1-syntrophin	SNTB1	SNTB1	0.210994	0.0115013	-0.199493
0.514323	0.466429	0.851955	1.04415	1.3701	1.42708	0.645917	0.752506	0.685167	0.978863	0.720881	0.426121	1.34921	0.573617	0.841286	0.671527	1.02601	0.29962	1.5895	0.848335	1.93554	1.20047	1.64196	1.09226	0.84446	1.20583	0.681927	1.37477	0.443287	0.469082	0.558198	0.295923	-0.0775958	1.26332	0.974991	0.773564	1.2829	1.55479	1.31849	0.598287	0.600924	2977	P61769	P61769	Beta-2-microglobulin;Beta-2-microglobulin form pI 5.3	B2M	B2M	0.752506	0.911663	0.159157
NaN	-0.147552	NaN	1.02885	-0.695183	1.44195	NaN	NaN	NaN	NaN	1.08241	NaN	NaN	NaN	0.496922	0.916275	NaN	NaN	1.53646	NaN	NaN	NaN	0.669116	NaN	1.52908	0.25208	NaN	NaN	NaN	0.920479	0.481917	NaN	NaN	NaN	0.186956	NaN	-0.164752	NaN	NaN	NaN	0.511553	4232	Q562R1	Q562R1	Beta-actin-like protein 2	ACTBL2	ACTBL2	0.762886	0.590334	-0.172552
-1.15408	-0.957986	-0.343787	0.0381266	-0.484273	-0.635813	0.322293	-0.0261866	-0.316175	-0.573944	0.212894	0.484259	-0.118921	0.217273	-0.198181	0.602437	-0.207881	-0.0460772	-1.07788	-1.47679	-0.0541991	-1.51784	-0.342161	-0.12742	0.149663	-0.486806	-0.068407	-1.30318	-1.43392	0.075111	0.223418	0.27102	-1.23967	-0.874625	-0.983583	-0.546702	-0.576407	-0.842326	-0.167052	-1.69699	-0.924934	2006	P25098	P25098	Beta-adrenergic receptor kinase 1	ADRBK1	ADRBK1	-0.198181	-0.516754	-0.318573
0.967326	1.5961	1.04838	1.57187	1.32834	1.61721	0.518952	1.24333	1.22891	1.12946	1.64154	1.41141	1.56573	1.10102	1.18093	1.27055	1.47829	0.894016	2.05768	1.00007	1.34195	0.779869	1.97223	1.30385	1.26857	1.45795	1.10292	0.425568	0.753142	1.51932	1.71589	1.31153	0.554356	0.360983	0.55375	0.994702	1.41753	1.38508	0.949595	0.422908	1.60283	2561	P49407-2;P49407	P49407-2;P49407	Beta-arrestin-1	ARRB1	ARRB1	1.24333	1.26956	0.0262266
0.380163	0.581268	1.84566	1.90726	1.63649	0.338178	1.91526	2.92669	1.9741	2.84853	2.21964	1.395	1.43001	1.952	1.44331	2.28298	1.70834	-0.277032	1.09002	-0.0452923	2.11394	1.6694	0.303028	1.63117	1.86744	2.20886	1.83884	0.906529	0.799528	2.25154	2.8354	1.36562	1.07101	2.04361	1.53044	2.13783	2.56923	2.32582	2.10573	0.129696	0.46652	2219	P32121;P32121-3;P32121-4;P32121-5;P32121-2	P32121;P32121-3;P32121-4;P32121-5;P32121-2	Beta-arrestin-2	ARRB2	ARRB2	1.84566	1.68887	-0.156786
0.250984	0.38179	-0.0855459	-0.0490919	0.714726	-0.0989792	-0.239946	-0.200788	0.278815	0.160913	-0.180417	-0.272743	-0.09551	-0.281598	0.246933	-0.0553083	0.588751	0.0442253	-0.0147505	0.535734	0.358434	0.261674	-0.154925	0.247067	-0.483371	0.230624	0.341971	0.348065	0.626066	-0.215077	0.127812	-0.392961	0.249414	0.0850103	0.408161	0.391037	0.157464	0.210077	0.0926669	0.651819	0.31218	5754	Q8WYA6;Q8WYA6-4;Q8WYA6-3;Q8WYA6-2	Q8WYA6;Q8WYA6-4;Q8WYA6-3;Q8WYA6-2	Beta-catenin-like protein 1	CTNNBL1	CTNNBL1	-0.0855459	0.238845	0.324391
0.5402	0.0115712	0.807781	0.651475	0.415627	0.95049	1.1853	0.812298	-0.128776	0.51074	0.637819	0.558462	0.923027	0.697733	0.495871	0.861159	-0.00869211	0.998331	0.778729	-0.218484	0.993455	-0.140712	0.195958	0.766073	0.801233	0.463123	0.558664	-0.0178409	0.241204	0.790757	0.669968	0.705426	0.360232	1.47058	0.294125	-0.0854007	0.392284	0.206133	1.54781	-0.384203	0.694039	2398	P42025	P42025	Beta-centractin	ACTR1B	ACTR1B	0.637819	0.510893	-0.126926
-0.481028	0.165493	1.10297	0.741941	1.18159	-0.23652	0.0454256	0.702793	0.563631	0.593766	0.317071	0.763651	0.356835	1.01816	1.02858	0.264624	0.0300991	-1.28937	0.599762	1.34976	0.327076	1.11444	0.214144	-1.42582	0.36372	0.809164	-0.845271	-0.0843181	0.85307	0.939495	-0.114678	0.369544	0.554381	0.579081	0.376052	0.346933	1.39921	0.46494	0.0657234	0.652977	0.530488	1747	P16278-3;P16278;P16278-2	P16278-3;P16278;P16278-2	Beta-galactosidase	GLB1	GLB1	0.593766	0.372798	-0.220968
1.98194	0.779933	1.6119	1.33249	1.94827	0.447054	0.73137	1.37134	1.94244	1.76447	1.26	1.58474	1.30475	1.27775	2.24132	1.79628	1.67144	2.14693	1.84804	1.71955	1.90653	1.96309	0.366539	0.778656	0.877406	1.63991	0.48773	1.02602	1.38659	1.67697	1.82685	0.975071	1.4451	2.71734	0.553691	1.37509	2.00427	1.07436	2.17551	1.23635	1.16203	1427	P08236-2;P08236;P08236-3	P08236-2;P08236;P08236-3	Beta-glucuronidase	GUSB	GUSB	1.37134	1.5425	0.171165
0.440021	0.712271	1.10231	0.65981	0.958187	0.0440851	0.272986	1.02633	0.88994	1.32246	0.725843	1.09294	0.500054	1.31271	2.04232	0.699525	0.505013	1.44742	0.561009	0.99495	0.207162	1.19123	0.723173	0.781519	-0.0679213	1.34217	-0.531687	0.469838	0.437267	1.21172	0.882686	0.670137	1.21827	1.9621	1.24724	0.679224	1.29239	0.825291	1.8754	0.975235	0.835833	1371	P06865;P06865-2	P06865	Beta-hexosaminidase subunit alpha	HEXA	HEXA	0.88994	0.830562	-0.0593781
0.536818	0.884318	1.86908	0.78515	0.713669	0.101942	1.21013	1.39182	0.853498	1.69099	1.23027	1.36837	0.429001	1.76421	1.83988	1.1416	0.528025	1.27112	0.0313883	0.610181	0.73332	1.43632	0.778439	0.742485	0.829101	1.15842	0.727125	0.650771	-0.248505	1.37189	0.799309	1.05777	0.694061	1.00684	1.33324	0.755265	1.7825	0.793224	1.49667	1.23013	0.231852	1394	P07686;REV__P13929-3;REV__P13929-2;REV__P13929	P07686	Beta-hexosaminidase subunit beta;Beta-hexosaminidase subunit beta chain B;Beta-hexosaminidase subunit beta chain A	HEXB	HEXB	1.21013	0.796266	-0.413867
-0.962991	-1.5819	-1.11482	-0.766228	-1.72776	-1.00192	-0.533538	-1.27696	-1.44915	-1.53862	-0.670245	-0.463472	-0.648118	-0.761567	-1.23675	-0.966408	-1.32677	-0.860944	-1.38462	-1.04014	-0.86566	-1.09274	-1.25039	-0.859005	-0.68089	-1.58337	-0.390877	-1.0495	-1.77036	-0.804135	-1.07621	0.34614	-0.873692	-1.64365	-1.21982	-1.30061	-1.23424	-1.392	-0.667132	-1.01857	-0.957864	4219	Q53H82	Q53H82	Beta-lactamase-like protein 2	LACTB2	LACTB2	-1.00192	-1.04482	-0.042904
1.89853	1.70102	1.49186	1.1528	2.97365	-0.237455	0.462797	0.49582	1.75545	1.69501	1.11976	1.22769	1.57621	1.40357	2.67994	1.30626	1.55033	0.00969129	1.4857	2.58148	1.98973	2.26747	1.26094	0.492998	0.489395	1.60754	0.287136	1.38874	2.84142	1.4319	1.17495	1.06917	2.48046	2.45615	1.11972	2.10785	1.95801	1.99918	1.72863	1.66891	1.96314	292	O00462	O00462	Beta-mannosidase	MANBA	MANBA	1.49186	1.57894	0.0870767
3.83436	NaN	2.28386	NaN	NaN	4.1842	2.40546	2.05052	NaN	NaN	2.96057	1.96055	3.08233	NaN	2.40551	NaN	1.52324	4.21727	4.23478	NaN	2.23294	2.2382	3.07491	1.67766	2.82708	NaN	2.28319	3.67197	2.36589	2.69498	NaN	0.0905546	3.58085	2.93035	2.60659	0.306361	NaN	NaN	NaN	2.12343	4.06762	7217	Q9HBI1-3	Q9HBI1-3	Beta-parvin	PARVB	PARVB	2.40551	2.60659	0.201076
-1.06388	-0.886497	-2.2168	-2.22984	-0.404225	-1.40893	-2.26142	-1.54704	-0.391018	-1.01029	-2.10423	-2.3873	-1.94437	-2.22549	-1.61572	-1.07935	-0.567944	-1.03776	-1.2337	-0.274112	-0.594462	-0.65341	-0.438438	-0.568868	-1.88121	-1.59948	-0.446946	-0.244963	-0.375466	-2.28367	-0.837019	-1.85716	-0.271245	-0.752948	0.194672	-0.752577	-1.26215	-1.08798	-0.965676	-0.227644	-1.00121	5609	Q8TDN6	Q8TDN6	Ribosome biogenesis protein BRX1 homolog	BRIX1	BRIX1	-1.61572	-0.752763	0.862956
0.805644	1.42417	0.323099	0.880302	0.762157	0.599543	1.96746	1.30707	0.60337	0.0719587	1.0187	0.62108	0.735523	0.482208	0.649864	1.01813	1.03881	0.155621	0.405278	-0.546055	0.598249	-1.07933	0.649866	0.0891712	0.693095	1.25745	0.798137	-0.539301	1.07851	1.51937	1.34725	1.6682	0.258219	-0.986925	-0.510619	0.990716	0.809689	0.722225	0.53686	-0.0998298	1.18966	525	O43252	O43252	Bifunctional 3-phosphoadenosine 5-phosphosulfate synthase 1;Sulfate adenylyltransferase;Adenylyl-sulfate kinase	PAPSS1	PAPSS1	0.735523	0.67148	-0.0640424
-1.15028	-0.992209	-0.526194	-0.294108	-1.25466	-1.48227	-0.264746	-1.44682	-1.16332	-0.859761	-0.562094	-0.527114	-0.958277	-0.430432	-0.504776	-1.4935	-1.20526	NaN	-1.75036	-0.729627	-1.265	NaN	-1.38875	-0.596976	-0.480978	0.211894	-1.15816	-0.628591	-0.460272	-0.478283	-1.44246	-0.381621	-0.871872	NaN	-0.679885	-0.85474	-0.730693	-0.167322	-1.09272	0.253804	-1.17025	4554	Q6NYC1-2;Q6NYC1;Q6NYC1-3	Q6NYC1-2;Q6NYC1;Q6NYC1-3	Bifunctional arginine demethylase and lysyl-hydroxylase JMJD6	JMJD6	JMJD6	-0.859761	-0.730693	0.129067
1.71097	1.50866	0.456175	1.21486	0.939983	1.36266	1.9048	1.29547	0.456249	0.272172	1.1665	1.66085	1.43906	1.33924	1.61451	1.49909	1.41355	1.86351	1.33837	-0.229733	1.52338	-0.708758	1.96589	1.81109	1.22921	0.801132	0.892806	-0.224598	0.406496	1.61538	1.56127	1.5183	0.921371	0.010682	-0.0262253	0.876545	0.380539	0.360655	1.38816	0.0196747	1.61171	4148	Q3LXA3;Q3LXA3-2	Q3LXA3;Q3LXA3-2	Bifunctional ATP-dependent dihydroxyacetone kinase/FAD-AMP lyase (cyclizing);ATP-dependent dihydroxyacetone kinase;FAD-AMP lyase (cyclizing)	DAK	DAK	1.33924	1.07529	-0.26395
-0.787996	-0.344965	-0.726079	0.0596178	-0.362207	-0.366928	-0.69202	-0.550383	-0.438275	-0.864108	-0.121772	0.0842335	-0.244705	-0.124895	-0.630129	-0.235098	-0.431177	0.142449	-1.11522	-0.526376	-0.276426	-0.793329	-0.477688	-0.27519	-0.0877717	-0.847915	-0.981639	-0.503694	-0.767485	-0.201412	-0.628344	-0.325442	-0.450514	-0.642549	-0.792602	-0.566068	-0.814295	-0.9999	-0.315025	-0.447713	-0.204393	3489	Q13057;Q13057-2	Q13057;Q13057-2	Bifunctional coenzyme A synthase;Phosphopantetheine adenylyltransferase;Dephospho-CoA kinase	COASY	COASY	-0.366928	-0.490691	-0.123763
-1.19562	-1.50801	-0.741012	-0.954465	-1.66476	-1.22962	-1.28791	-0.932657	-1.7235	-1.0633	-0.958364	-0.898978	-0.97373	-0.897822	-1.07418	-0.889008	-1.38633	-0.826497	-1.2862	-1.02059	-1.31702	-0.940141	-1.40748	-1.40832	-0.747486	-1.25361	-1.29047	-1.17921	-1.38079	-0.963899	-1.31312	-1.27546	-1.4211	-0.944485	-1.33199	-1.61204	-1.28417	-1.18732	-1.13302	-1.30657	-1.1338	1400	P07814	P07814	Bifunctional glutamate/proline--tRNA ligase;Glutamate--tRNA ligase;Proline--tRNA ligase	EPRS	EPRS	-1.0633	-1.27982	-0.216515
-0.00346538	0.79102	1.0546	0.780454	NaN	-0.392249	-0.851395	-0.57009	NaN	1.08425	-0.114649	NaN	0.670095	0.779174	-0.101358	0.250021	NaN	-0.11483	NaN	0.813383	0.180226	0.246911	-0.103946	NaN	0.306713	-0.911804	-0.0229426	NaN	0.130342	-0.0946133	-0.615093	0.687992	NaN	0.544939	-0.0833825	0.240439	0.153787	0.899898	NaN	0.475641	NaN	2745	P52849;P52849-2	P52849;P52849-2	Bifunctional heparan sulfate N-deacetylase/N-sulfotransferase 2;Heparan sulfate N-deacetylase 2;Heparan sulfate N-sulfotransferase 2	NDST2	NDST2	0.333315	0.180226	-0.153089
0.459726	-0.0518753	0.410728	0.146342	0.173096	-0.254358	0.780278	0.250639	1.12023	0.399339	-0.219879	0.175356	-0.372743	0.336105	0.469659	0.945433	1.24197	-0.328895	1.09381	1.07197	-0.324276	-0.0231793	1.48091	0.67101	0.555106	0.880889	-0.247481	NaN	1.29188	0.328705	1.32946	0.243006	0.729495	NaN	0.748182	1.87741	0.875853	1.12476	0.185221	-0.0178625	0.410214	5075	Q8IUF8;Q8IUF8-4;Q8IUF8-3;Q8IUF8-2	Q8IUF8;Q8IUF8-4;Q8IUF8-3	Bifunctional lysine-specific demethylase and histidyl-hydroxylase MINA	MINA	MINA	0.250639	0.738838	0.4882
NaN	0.415172	NaN	NaN	0.928156	NaN	0.470344	NaN	NaN	NaN	0.665176	0.545698	NaN	NaN	NaN	1.59611	NaN	NaN	2.17828	0.475503	NaN	NaN	1.49485	NaN	NaN	NaN	NaN	NaN	NaN	NaN	1.57045	0.999823	NaN	NaN	NaN	NaN	NaN	1.25333	NaN	NaN	1.31695	3638	Q13643	Q13643	Four and a half LIM domains protein 3	FHL3	FHL3	0.545698	1.4059	0.860202
-2.00904	-2.65121	-2.63198	-2.39424	-2.98547	-2.84008	-4.39591	-2.7586	-3.15794	-2.87918	-3.03544	-3.34848	-1.34857	-2.81927	-3.62597	-3.39441	-3.1815	NaN	-2.88502	-1.52761	-3.17761	-1.82769	-2.6921	-2.84632	-2.87828	-1.74261	-2.94303	-1.41489	-2.1723	-3.85759	-3.72776	-2.8461	-4.26227	-1.91248	-2.96206	-3.21494	-2.21174	-3.18956	-3.4424	-1.98288	-4.62705	1673	P13995;P13995-2	P13995;P13995-2	Bifunctional methylenetetrahydrofolate dehydrogenase/cyclohydrolase, mitochondrial;NAD-dependent methylenetetrahydrofolate dehydrogenase;Methenyltetrahydrofolate cyclohydrolase	MTHFD2	MTHFD2	-2.84008	-2.88502	-0.0449402
0.629146	0.85938	0.569029	0.201892	0.823122	0.363752	0.876644	0.253929	0.884169	0.671987	0.371485	0.605801	0.364936	0.778426	0.907177	0.452391	0.920645	1.26792	0.263331	0.926043	0.40688	0.840227	0.159625	1.5166	0.499103	0.763201	0.349466	0.759057	0.632231	0.124591	0.511653	0.801458	1.28831	0.796358	0.418142	0.901905	0.875682	0.68921	0.662466	1.05293	0.441441	6432	Q96T60;Q96T60-2	Q96T60;Q96T60-2	Bifunctional polynucleotide phosphatase/kinase;Polynucleotide 3-phosphatase;Polynucleotide 5-hydroxyl-kinase	PNKP	PNKP	0.629146	0.724133	0.0949878
0.49015	0.379885	-0.315669	0.106532	0.391208	1.06869	-0.333463	0.397832	0.581574	-0.332778	0.344517	0.462956	0.701428	0.342737	0.0930745	0.677917	0.748861	1.33436	0.723271	-0.717527	0.383811	-0.668784	1.13094	0.615964	0.752232	-0.434998	0.390808	0.0520901	0.231105	0.532772	0.791633	-0.534783	0.624543	0.151066	NaN	0.419048	-0.559799	-0.439385	0.942564	-0.330839	0.598238	684	O60502-4;O60502;O60502-2;O60502-3	O60502-4;O60502;O60502-2;O60502-3	Bifunctional protein NCOAT;Protein O-GlcNAcase;Histone acetyltransferase	MGEA5	MGEA5	0.379885	0.419048	0.0391632
-0.417258	-1.14606	-1.78486	-0.628386	-1.17193	-0.0421558	-0.241311	-0.745356	-1.11265	-1.83024	-0.869803	-0.35811	-0.305334	-0.619806	-1.08693	-0.895175	-0.487963	-0.817612	-0.961908	-1.58394	-0.952872	-1.6783	-0.379093	-1.01157	-0.312269	-2.06762	-1.02486	-1.25841	-0.873281	-0.456931	-0.578982	-0.83453	-0.632148	-1.40253	-1.59509	-0.929073	-1.86927	-1.89105	-0.522318	-1.27641	-0.207015	2204	P31939;P31939-2	P31939;P31939-2	Bifunctional purine biosynthesis protein PURH;Phosphoribosylaminoimidazolecarboxamide formyltransferase;IMP cyclohydrolase	ATIC	ATIC	-0.745356	-0.940973	-0.195617
NaN	0.165222	-1.15696	-0.564727	NaN	NaN	-0.321703	-0.780001	-0.990621	-0.44727	NaN	-0.30364	NaN	-0.47937	-0.168258	-0.530152	-0.588034	-0.738798	NaN	NaN	-0.576867	NaN	0.0456729	0.12566	-0.482915	-0.495865	-0.443722	-1.22515	-0.876211	-0.283226	-0.747244	-0.0517886	-1.268	-1.31989	NaN	-0.78686	-0.710088	-0.936957	NaN	NaN	0.0272151	8131	Q9Y223-5;Q9Y223-3;Q9Y223;Q9Y223-2;Q9Y223-4	Q9Y223-5;Q9Y223-3;Q9Y223;Q9Y223-2;Q9Y223-4	Bifunctional UDP-N-acetylglucosamine 2-epimerase/N-acetylmannosamine kinase;UDP-N-acetylglucosamine 2-epimerase (hydrolyzing);N-acetylmannosamine kinase	GNE	GNE	-0.46332	-0.582451	-0.11913
1.45933	-1.57444	0.427557	1.78855	-0.435236	1.52897	2.43356	2.67483	0.447834	0.295619	1.83797	1.60689	1.69186	1.47439	0.743974	2.0718	1.52114	-0.111974	-0.147636	-1.32858	1.39131	-0.741521	1.75684	0.713202	2.44902	-0.0732247	0.679507	0.265537	-1.81142	1.41027	2.07172	0.677727	-0.534894	0.211666	0.835504	1.14062	0.958491	0.178405	1.90407	-0.170202	-1.59045	2751	P53004	P53004	Biliverdin reductase A	BLVRA	BLVRA	1.47439	0.678617	-0.795773
1.24656	0.758674	1.25363	0.780302	0.69306	0.490964	0.473666	1.12951	1.01677	1.37081	NaN	0.932129	1.06792	1.31789	NaN	0.743622	0.0615821	1.30482	0.827618	0.947729	1.41162	1.11416	NaN	0.694929	NaN	1.35077	NaN	NaN	0.0742529	0.86762	1.11362	1.03273	0.785525	1.32267	0.566502	0.714013	1.04491	0.77839	1.2405	0.8099	1.01996	3132	P78537-2;P78537	P78537-2;P78537	Biogenesis of lysosome-related organelles complex 1 subunit 1	BLOC1S1	BLOC1S1	1.01677	0.907674	-0.109099
0.802818	0.833547	1.22147	0.847554	0.461288	NaN	1.02418	0.957383	0.681517	0.992533	0.922975	1.03207	0.872733	1.0701	1.1563	0.804263	0.56385	1.21326	0.73664	0.552289	0.941519	1.07391	0.251264	0.579912	0.834692	1.27203	0.31177	0.0830958	0.43969	1.00207	0.765042	1.14884	0.958453	1.50029	0.539613	0.529938	0.917778	0.870815	0.591286	0.718103	0.611967	4644	Q6QNY1;Q6QNY1-2	Q6QNY1;Q6QNY1-2	Biogenesis of lysosome-related organelles complex 1 subunit 2	BLOC1S2	BLOC1S2	0.940179	0.750841	-0.189338
NaN	0.774486	1.2863	1.01514	0.554276	NaN	0.982276	0.804506	NaN	0.931977	0.874886	0.836095	1.07949	0.95692	1.02252	0.757023	0.757209	NaN	1.1293	0.336412	0.860072	NaN	0.946619	1.1386	1.04295	NaN	0.87815	0.136231	0.56322	0.922997	0.642773	0.828431	NaN	0.386918	0.906943	1.00558	0.896352	1.10904	NaN	0.350617	0.37246	4643	Q6QNY0	Q6QNY0	Biogenesis of lysosome-related organelles complex 1 subunit 3	BLOC1S3	BLOC1S3	0.944449	0.860072	-0.0843766
0.682342	1.45354	NaN	1.0133	NaN	NaN	NaN	NaN	0.893252	1.70403	0.74876	NaN	NaN	1.0729	-0.377814	NaN	-0.220155	1.50058	NaN	-0.118743	0.863381	NaN	NaN	NaN	NaN	NaN	NaN	NaN	NaN	1.01506	NaN	NaN	0.659126	NaN	NaN	-0.922256	1.33386	NaN	NaN	0.650033	NaN	7471	Q9NUP1	Q9NUP1	Biogenesis of lysosome-related organelles complex 1 subunit 4	BLOC1S4	BLOC1S4	0.953274	0.659126	-0.294148
1.20117	NaN	1.90604	0.813578	NaN	NaN	NaN	1.12347	NaN	NaN	0.864871	0.873919	1.58682	1.25636	-0.290843	1.23003	NaN	1.93877	NaN	NaN	NaN	1.55607	-1.1359	NaN	NaN	NaN	1.06763	NaN	0.00932973	1.48259	NaN	1.23764	NaN	NaN	NaN	1.20219	1.80362	0.0988559	NaN	0.823375	NaN	5605	Q8TDH9;Q8TDH9-2;Q8TDH9-3	Q8TDH9;Q8TDH9-2;Q8TDH9-3	Biogenesis of lysosome-related organelles complex 1 subunit 5	BLOC1S5	BLOC1S5	1.12347	1.21611	0.0926383
NaN	NaN	NaN	0.623505	NaN	NaN	NaN	NaN	0.723882	0.796877	NaN	NaN	0.70918	0.857638	NaN	0.851685	0.577986	1.44603	0.725185	0.572422	0.906065	NaN	NaN	NaN	NaN	NaN	0.52165	0.129069	0.460221	0.772218	0.85321	NaN	0.432306	NaN	NaN	3.04891	0.981377	0.687869	1.09171	NaN	NaN	8002	Q9UL45;Q9UL45-2	Q9UL45;Q9UL45-2	Biogenesis of lysosome-related organelles complex 1 subunit 6	BLOC1S6	BLOC1S6	0.723882	0.748701	0.024819
0.398198	0.473865	0.0656089	-0.0633575	0.22212	-0.461484	-0.0997287	-0.0149058	0.464184	0.210418	-0.0572484	-0.174854	-0.139341	-0.146035	0.0239024	-0.224207	0.266508	0.136521	0.0439194	0.124043	0.133323	0.39217	-0.152019	0.584568	0.0271553	0.260455	0.503636	0.560908	0.796381	-0.136803	0.210451	-0.285435	0.526829	-0.13962	0.470666	0.371111	-0.00639471	0.492836	0.0117236	0.645583	-0.207015	5496	Q8NFC6;Q96IK1-2	Q8NFC6	Biorientation of chromosomes in cell division protein 1-like 1	BOD1L1	BOD1L1	-0.0149058	0.173486	0.188392
NaN	3.39041	2.05982	1.94286	4.16188	3.20452	0.417962	NaN	2.64489	NaN	NaN	1.88176	NaN	0.751151	1.88064	0.299497	3.32082	NaN	2.68282	2.59365	3.12883	NaN	NaN	3.09287	2.33346	3.04245	0.276891	2.2793	3.80653	2.71159	2.06975	0.173489	3.02501	4.09417	3.08393	NaN	2.44103	2.49596	4.15635	2.75288	2.91399	8462	Q9Y6X5;Q6UWV6	Q9Y6X5	Bis(5-adenosyl)-triphosphatase ENPP4	ENPP4	ENPP4	2.00134	2.73223	0.730889
-0.310584	-0.493611	NaN	NaN	NaN	0.593947	NaN	-0.589818	-0.0330709	NaN	NaN	0.77704	NaN	0.100896	-0.625566	1.29133	-0.255196	-0.0952362	0.383486	NaN	-0.0675767	-1.43012	-0.145816	0.119412	1.01668	-0.4489	-0.251909	-0.75779	-0.605167	0.0406978	NaN	0.840634	NaN	NaN	NaN	NaN	-0.797793	NaN	-0.0329512	NaN	0.0560024	2648	P50583	P50583	Bis(5-nucleosyl)-tetraphosphatase [asymmetrical]	NUDT2	NUDT2	-0.171827	-0.0814064	0.0904208
5.43737	NaN	NaN	NaN	NaN	2.10943	2.3007	NaN	NaN	NaN	NaN	NaN	1.66388	1.35098	NaN	1.37816	NaN	NaN	2.68479	NaN	1.97314	2.06179	3.11143	1.16648	NaN	NaN	NaN	3.2208	1.92705	NaN	1.8564	-0.242062	3.83104	3.90944	NaN	3.26023	NaN	NaN	4.28917	3.51668	2.87618	1397	P07738	P07738	Bisphosphoglycerate mutase	BPGM	BPGM	2.10943	2.78048	0.671055
-0.0108121	-0.396475	-0.488149	-0.377098	-0.61052	0.259388	0.322567	-0.0853485	-0.596371	-0.897514	0.178548	0.269127	0.274212	-0.240668	-0.515474	0.516233	0.19999	0.49601	0.452501	-1.05347	-0.175656	-1.43259	0.48264	-0.0618129	0.141775	-1.1912	0.0142952	-0.663335	-0.660018	0.0955314	0.350599	-0.6299	-0.0251335	-0.958685	-1.22347	-0.419492	-0.883467	-1.01975	0.311077	-0.786299	0.186572	3655	Q13867	Q13867	Bleomycin hydrolase	BLMH	BLMH	-0.240668	-0.118734	0.121933
0.506679	0.453795	0.0836492	-0.25166	-0.483779	-0.133088	-0.0918988	0.087258	0.697512	0.0519344	-0.0559205	-0.465131	-0.0664777	-0.622753	0.103026	-0.101488	-0.324914	-0.0191912	-0.0787019	-0.364684	0.0697866	0.111874	-0.118576	0.451275	-0.143654	0.267282	0.593199	0.213133	0.256056	-0.0938113	0.178558	-0.123711	0.132357	0.141321	0.507992	0.409323	-0.196367	0.312077	0.107699	0.271258	0.0366017	2792	P54132	P54132	Bloom syndrome protein	BLM	BLM	-0.0559205	0.109787	0.165707
NaN	NaN	NaN	NaN	0.263989	NaN	0.198485	NaN	NaN	0.94283	0.537956	0.668365	NaN	NaN	NaN	-0.0930066	NaN	NaN	NaN	-0.832703	NaN	-0.214134	NaN	0.237167	0.289417	NaN	-0.34134	0.00384258	NaN	NaN	NaN	0.289872	NaN	0.540477	NaN	NaN	0.372045	0.409071	NaN	NaN	0.825463	7445	Q9NSY1;Q9NSY1-2;Q9NSY1-3	Q9NSY1;Q9NSY1-2;Q9NSY1-3	BMP-2-inducible protein kinase	BMP2K	BMP2K	0.537956	0.263292	-0.274664
-0.571159	-1.15027	-2.39727	-0.275377	-0.70293	0.129649	-0.198788	-0.740512	-1.00425	-2.73187	-0.188819	-0.28626	-0.34477	-0.643612	-1.0804	0.0906897	-0.586594	-0.0597834	-0.98503	-1.96578	-0.325541	-1.62157	0.0623162	-0.791107	-0.00241241	-1.91464	-0.970408	-1.52678	-1.02485	-0.290186	-0.340716	0.0556408	-1.24242	-1.51728	-1.70025	-1.20371	-2.27167	-2.45946	-0.254216	-1.34064	-0.608974	7027	Q9H3K6;Q9H3K6-2	Q9H3K6;Q9H3K6-2	BolA-like protein 2	BOLA2	BOLA2	-0.643612	-0.977719	-0.334107
-2.81011	-2.02332	-2.01532	-3.07522	-4.2064	-0.0808703	-4.25388	-1.14317	-3.63633	-0.830316	-2.71164	-2.46709	-1.11581	-2.98812	-1.42136	-3.17083	-0.761962	-3.38643	-8.74777	-0.133316	-2.06248	-0.776646	-5.41484	-4.03656	-1.31903	-5.26451	-3.92225	-2.47941	-3.9344	-3.8463	0.337092	-5.54062	-3.56468	1.9097	1.72275	-2.0033	-2.68731	0.314343	-1.79183	-1.60504	-3.2198	1658	P13727;P13727-2	P13727;P13727-2	Bone marrow proteoglycan;Eosinophil granule major basic protein	PRG2	PRG2	-2.46709	-2.58336	-0.116268
-2.96011	-1.26553	0.994517	0.436232	-1.23433	0.501652	1.90492	-0.0587726	-2.04497	0.40745	0.63421	0.479639	0.0259227	0.688352	-0.286814	-1.3967	0.089014	NaN	-0.199184	0.663549	-0.776224	0.680897	0.304922	0.7992	0.415066	0.881142	0.200532	0.68129	-1.72326	0.567554	-1.5555	0.885747	-0.693849	-0.449293	-0.77863	-1.30089	1.7548	0.913175	-0.88563	-1.42424	-1.27774	3419	Q10589-2;Q10589	Q10589-2;Q10589	Bone marrow stromal antigen 2	BST2	BST2	0.40745	0.089014	-0.318436
0.21778	0.279909	-1.82981	-1.2037	-0.0818012	-0.401875	-1.48437	-1.81278	0.0455415	-1.07954	-1.28647	-1.53456	-0.815588	-1.63506	-0.672108	-0.964702	-0.43427	-0.285757	-0.260706	0.670349	-0.588232	0.121781	0.443978	0.255959	-1.72032	-0.427362	0.189534	0.0939301	-0.143365	-0.906276	-0.551467	-2.15927	0.0900866	-0.792055	0.356552	-0.17854	-0.52987	0.21401	-0.677623	0.730736	0.692718	1073	O95602	O95602	DNA-directed RNA polymerase I subunit RPA1	POLR1A	POLR1A	-1.07954	-0.219623	0.859919
-3.08332	-4.59631	-2.58323	-4.267	-4.22844	-0.91546	-5.28392	-1.97879	-1.52429	-3.91837	-4.76179	-2.54831	-5.53219	-2.69502	-6.92538	-1.7227	-1.21506	-1.27437	-1.80479	-2.60983	-4.20835	-3.0585	-1.28581	-5.17928	-2.39782	-5.24124	-0.849714	-2.24646	-2.47685	-4.57112	-1.88991	-6.42387	-1.46834	-3.51041	-4.28579	-1.96766	-4.35748	-4.19848	-2.82159	-2.93046	-3.02016	2804	P54687-4;P54687;P54687-5;P54687-2;P54687-3	P54687-4;P54687;P54687-5;P54687-2;P54687-3	Branched-chain-amino-acid aminotransferase, cytosolic	BCAT1	BCAT1	-3.91837	-2.71571	1.20266
0.522726	0.610818	0.255986	0.0731796	0.639655	0.0841636	-0.747969	-0.203027	1.00997	0.335593	-0.0205336	-0.378035	0.151348	0.155299	0.695628	0.175151	0.497478	0.0663733	0.406642	1.16963	0.513724	0.842992	1.58709	0.657902	0.436282	-0.00452598	-0.539097	0.704001	0.730687	0.332192	0.512106	0.153782	0.656128	0.290178	1.47591	0.912987	0.67532	0.824518	0.303275	0.669608	0.666913	482	O15382;O15382-2	O15382;O15382-2	Branched-chain-amino-acid aminotransferase, mitochondrial	BCAT2	BCAT2	0.155299	0.584926	0.429627
0.874216	0.512578	0.699645	0.557471	0.387819	0.451901	0.563745	0.38539	-0.049009	0.377057	0.598324	0.481453	0.531321	0.430659	0.534807	0.77392	0.568277	0.678656	0.612513	0.0445401	0.277996	0.222107	0.684476	0.0343108	0.368306	-0.322865	0.938986	0.100768	0.111749	0.545989	0.501983	0.410329	0.525796	0.608731	0.545052	0.573507	0.488306	0.5473	0.776277	0.632621	0.586479	7597	Q9NXR7-1;Q9NXR7-4;Q9NXR7-3;Q9NXR7	Q9NXR7-1;Q9NXR7-4;Q9NXR7-3;Q9NXR7	BRCA1-A complex subunit BRE	BRE	BRE	0.512578	0.54552	0.0329425
0.80478	2.19248	0.894522	NaN	0.710153	0.184287	0.384108	NaN	0.910881	0.20717	1.23293	-0.390081	-0.0332547	0.270822	0.404229	0.827391	1.234	-0.16412	0.213178	1.0857	0.853142	0.672106	0.959691	0.257435	0.343392	0.865017	1.65584	0.271232	1.26232	-1.10571	0.420976	0.00761833	1.70361	0.145475	1.20078	0.161856	0.328552	1.27124	0.261989	1.51872	1.37214	6379	Q96RL1;Q96RL1-3;Q96RL1-2;Q96RL1-4;Q96RL1-5	Q96RL1;Q96RL1-3;Q96RL1-2	BRCA1-A complex subunit RAP80	UIMC1	UIMC1	0.404229	0.749749	0.34552
-1.07771	-0.624872	-0.94102	-0.750973	-1.19567	-1.21057	-0.297976	-1.00814	-1.40128	-1.45202	-0.848122	-0.599348	-0.722265	-0.652685	-0.990049	-1.14322	-1.08033	-0.984009	-1.02094	-0.955364	-1.16417	-1.30201	-0.80028	-0.173126	-0.955017	-0.705139	-0.459357	-1.49234	-1.1577	-0.774957	-1.2439	-0.237891	-1.34805	-1.31559	-1.60769	-0.989241	-1.28097	-0.996653	-1.69023	-0.832631	-0.702164	4633	Q6PJG6;Q6PJG6-2;Q6PJG6-3	Q6PJG6	BRCA1-associated ATM activator 1	BRAT1	BRAT1	-0.94102	-1.0088	-0.0677777
NaN	-1.17715	NaN	0.143447	NaN	NaN	NaN	0.153936	NaN	NaN	-0.826708	NaN	NaN	NaN	-0.467288	-0.00305106	-1.10938	NaN	NaN	NaN	NaN	NaN	NaN	NaN	NaN	NaN	0.0707422	NaN	NaN	NaN	NaN	NaN	NaN	NaN	NaN	NaN	NaN	-0.809455	NaN	NaN	0.635996	4889	Q7Z569;Q7Z569-2	Q7Z569;Q7Z569-2	BRCA1-associated protein	BRAP	BRAP	-0.467288	-0.00305106	0.464237
-0.780694	-1.26135	-1.60822	-0.975082	-1.53545	-1.1727	-0.571942	-0.819451	-1.02723	-1.52074	-0.809299	-1.20499	-1.07286	-1.46133	-1.27556	-0.942484	-1.02429	-1.1601	-1.39726	-1.05424	-1.2003	-1.50854	-1.03372	-1.22511	-0.916126	-0.842559	-0.957286	-1.33182	-0.928525	-1.12501	-0.978312	-0.885332	-1.15019	-1.71039	-1.36997	-0.911928	-1.21835	-1.00186	-1.291	-1.13698	-0.561597	7728	Q9P287;Q9P287-3;Q9P287-4;Q9P287-2	Q9P287;Q9P287-3;Q9P287-4;Q9P287-2	BRCA2 and CDKN1A-interacting protein	BCCIP	BCCIP	-1.1727	-1.08963	0.0830697
1.06774	1.79359	0.564584	1.33488	1.94124	0.565164	NaN	0.486078	1.79351	0.995809	NaN	0.679584	1.4254	0.617818	1.39529	1.68006	2.65611	1.00409	2.10395	-0.0781518	2.20867	1.30145	3.27248	1.59435	1.1585	NaN	2.42489	1.28691	0.320742	0.807261	1.75999	1.0328	1.37716	-0.155051	2.164	0.446981	0.556313	0.305668	0.394114	1.19681	1.42483	1582	P11274;P11274-2	P11274;P11274-2	Breakpoint cluster region protein	BCR	BCR	1.06774	1.28691	0.219175
0.425655	0.742251	0.271317	-0.186139	0.775044	-0.290675	NaN	-0.214338	0.601452	0.540076	0.389886	0.319218	-0.147811	0.564811	0.677902	-0.000591045	0.506837	0.628619	0.291891	0.692179	0.822553	0.515512	0.618576	0.893108	-0.137223	0.610285	1.72233	0.704141	1.44704	NaN	0.137779	-0.329904	1.05673	0.399605	1.05806	1.36019	0.487556	1.07028	0.293058	1.05786	0.0975263	7259	Q9HCU9	Q9HCU9	Breast cancer metastasis-suppressor 1	BRMS1	BRMS1	0.40777	0.618576	0.210805
-0.261538	-0.336291	0.37824	0.399928	-0.152475	0.627915	0.33938	0.6456	-0.410036	0.126047	0.361488	0.471168	0.492036	0.123444	0.483115	0.525659	-0.12188	0.246613	0.753154	-0.780257	0.402449	-0.549209	0.121857	-0.591326	0.438028	0.158506	-0.149932	-1.06354	-0.357914	0.266424	0.437627	0.500514	-0.819298	0.805283	-0.252519	-0.309067	-0.0917334	-0.192744	0.934558	-1.23463	0.266845	8426	Q9Y6D6	Q9Y6D6	Brefeldin A-inhibited guanine nucleotide-exchange protein 1	ARFGEF1	ARFGEF1	0.361488	0.0150617	-0.346426
-0.0837359	-0.432262	0.526853	0.612156	-0.626043	0.308237	0.3066	0.228614	0.118434	0.276515	0.725818	0.393476	NaN	0.22199	0.536332	0.343118	-0.346853	0.527591	0.068777	-0.135758	0.103821	-0.359945	0.143305	-0.287718	-0.109036	0.22743	-0.292881	-0.487469	-0.493547	0.311327	-0.23061	0.596395	NaN	NaN	NaN	-0.461457	NaN	-0.0105207	-0.327976	NaN	0.32639	8425	Q9Y6D5	Q9Y6D5	Brefeldin A-inhibited guanine nucleotide-exchange protein 2	ARFGEF2	ARFGEF2	0.291558	-0.109036	-0.400594
-0.343026	-0.514353	0.511992	-0.153492	0.240837	-2.78143	-0.459719	0.0314872	0.398645	0.317923	-0.09859	-0.152145	-0.165041	0.05083	-0.549588	-0.222472	0.079273	-0.558105	-0.896833	-0.144821	0.213067	0.173996	-2.26827	0.216343	-0.484281	0.357626	-0.345368	-0.153051	-0.4577	0.0673361	-0.123029	-0.281367	-0.119275	0.297729	0.18938	0.212386	0.144405	-0.0222348	0.232082	-0.118045	-0.758774	5752	Q8WY22;REV__Q96PE2	Q8WY22	BRI3-binding protein	BRI3BP	BRI3BP	-0.152145	-0.11866	0.033485
1.80616	1.15582	1.84398	2.10258	1.72368	2.83388	1.98892	2.39233	0.941512	1.48036	2.25107	2.15206	2.50125	1.65479	2.22529	2.15571	1.89341	1.92433	3.44258	-0.538061	2.02676	0.276487	2.38138	0.584989	1.89103	1.32325	2.03408	0.550078	0.734316	1.81852	2.38768	2.12872	1.17652	1.47849	1.15257	1.25962	1.20518	1.02159	2.19846	-0.314471	1.89757	7803	Q9UBW5;Q9UBW5-2;P49418-2;P49418	Q9UBW5;Q9UBW5-2	Bridging integrator 2	BIN2	BIN2	1.98892	1.64851	-0.340416
0.817395	-0.0318976	0.346384	0.0888865	0.0872735	NaN	0.208548	0.386934	0.498406	0.476422	NaN	0.519571	0.0771482	0.25833	0.563945	0.381438	0.0802353	NaN	0.372224	0.1987	0.179213	0.18693	0.505296	0.55852	0.374267	0.296651	0.685024	0.131697	0.201365	0.562131	0.237809	0.376593	0.579782	0.54413	0.283529	0.615154	0.109403	0.473106	0.39509	0.396844	0.575935	7557	Q9NWV8;Q9NWV8-3;Q9NWV8-2	Q9NWV8;Q9NWV8-3	BRISC and BRCA1-A complex member 1	BABAM1	BABAM1	0.346384	0.376593	0.0302091
-0.0528603	-0.131234	0.525809	0.479908	-0.246117	0.208524	0.256331	0.445839	-0.352427	0.102321	0.179453	0.405703	0.580784	0.239636	0.355534	0.505191	-0.00173338	0.332708	0.18605	-0.496652	0.241688	-0.405478	0.253921	-0.308972	0.434612	0.0292864	-0.109236	-0.46502	-0.398187	0.558612	0.348728	0.119693	-0.290331	0.456393	-0.277033	-0.0424987	-0.133423	-0.102707	0.399535	-0.778431	0.177272	3845	Q15018	Q15018	BRISC complex subunit Abro1	FAM175B	FAM175B	0.239636	0.0137765	-0.225859
0.878462	0.51045	-0.315669	0.4503	-0.00259072	0.492451	0.408002	0.545422	-0.334971	-0.560805	0.540979	0.245993	0.461788	0.267775	0.0729569	0.624223	0.458876	0.976698	0.339947	-1.39003	-0.354342	-1.08464	0.187853	0.306723	0.825786	-0.332662	0.582202	-0.541127	-0.782399	0.367817	0.248281	0.584128	-0.29187	-0.673542	-0.616509	-0.097522	-0.637428	-1.2242	0.614751	-0.454195	0.419217	4417	Q5VW32;Q5VW32-2	Q5VW32;Q5VW32-2	BRO1 domain-containing protein BROX	BROX	BROX	0.408002	0.0451655	-0.362837
-1.31263	-0.647948	-1.2639	-1.00153	-1.18381	-1.96394	-1.30812	-0.721811	-0.651726	-0.508785	-0.886637	-1.50367	-1.49018	-1.08985	-0.864561	-1.27739	-1.31212	0.207551	-1.73808	-0.520594	-0.484235	-0.442756	-1.59015	0.858283	-1.42966	-0.260329	-0.572438	-0.630471	-0.53645	-1.28912	-1.15239	-1.35596	-1.30856	-0.0769162	-0.597198	-0.703183	-0.451677	-0.659827	-0.70735	-0.391462	-1.54824	7397	Q9NRL2;Q9NRL2-2	Q9NRL2;Q9NRL2-2	Bromodomain adjacent to zinc finger domain protein 1A	BAZ1A	BAZ1A	-1.08985	-0.645149	0.4447
0.0733599	-0.497134	NaN	0.0727848	-0.179872	NaN	NaN	NaN	0.718084	0.261914	-0.223265	-0.912225	NaN	-0.158069	0.162249	-0.496462	0.510563	NaN	-0.35279	0.88195	-0.0853657	0.506732	-0.441018	0.351842	NaN	0.701147	-0.115575	0.865307	0.0582032	-0.230823	-0.642552	NaN	0.80425	NaN	0.848072	0.0707298	0.35829	-0.0904524	-0.627161	NaN	-0.116489	7908	Q9UIF9-2;Q9UIF9-3;Q9UIF9	Q9UIF9-2;Q9UIF9-3;Q9UIF9	Bromodomain adjacent to zinc finger domain protein 2A	BAZ2A	BAZ2A	-0.0426423	0.0582032	0.100845
0.554471	0.989285	-0.0612545	0.0460817	0.53603	-0.177146	-0.204946	-0.179523	0.916213	0.487432	-0.316618	-0.514019	-0.139681	-0.130922	-0.21402	-0.00338536	0.667934	0.265929	-0.261357	0.833806	-0.236538	0.30833	0.0833672	0.747355	-0.362296	0.240945	0.942733	0.985562	0.854763	-0.0376581	0.382985	-0.597493	0.538336	0.241259	0.896967	0.909601	0.138643	0.309597	0.235068	0.936902	0.205592	1085	O95696;O95696-2	O95696;O95696-2	Bromodomain-containing protein 1	BRD1	BRD1	-0.130922	0.287129	0.418052
-0.0520053	0.452432	-0.449742	-0.0878459	0.117434	-0.584274	-0.623866	-0.620156	0.164669	-0.548483	-0.939088	-1.1039	-0.743368	-0.716037	-0.459232	-0.616173	-0.154789	0.233024	-0.441419	-0.0753183	-0.254959	-0.0155444	-0.184552	-0.123267	-0.455671	-0.182953	0.301907	0.572561	-0.0216077	-1.20448	-0.332672	-0.88329	-0.115246	-0.0863861	0.143727	0.231078	-0.533725	-0.154574	-0.567963	0.626112	-0.400361	2014	P25440-3;P25440;P25440-2	P25440-3;P25440;P25440-2	Bromodomain-containing protein 2	BRD2	BRD2	-0.548483	-0.154681	0.393802
0.224376	0.772246	0.126435	-0.229865	0.497729	-0.352305	-0.322639	0.0601323	0.984907	0.261461	-0.0812484	-0.203423	-0.0207773	-0.248632	0.0134888	0.275767	0.713176	0.151808	-0.0205736	0.581021	0.432905	0.342988	0.158538	0.571582	-0.471827	0.438251	0.847417	0.810286	1.16777	0.0291423	0.595286	-1.0399	0.669046	0.0403384	0.559502	0.877258	0.148499	0.72108	0.0974945	0.845844	0.320566	3870	Q15059;Q15059-2	Q15059;Q15059-2	Bromodomain-containing protein 3	BRD3	BRD3	0.0134888	0.435578	0.422089
0.451275	0.545251	0.163772	-0.0796109	0.200857	-0.062319	0.143427	0.0762922	0.535475	0.419687	0.0259107	-0.225367	-0.103467	-0.0355688	0.0372575	0.176895	0.40011	0.36011	0.112808	0.464592	0.2353	0.458337	0.154585	0.646271	0.0939129	0.346089	0.831266	0.725088	0.712328	-0.00712362	0.427918	-0.364228	0.617171	0.208593	0.679128	0.788912	0.264363	0.441554	0.19432	0.689971	-0.000100012	741	O60885;O60885-2;O60885-3	O60885;O60885-2;O60885-3	Bromodomain-containing protein 4	BRD4	BRD4	0.0762922	0.38011	0.303818
0.541816	0.527735	-0.80762	-0.548053	0.411512	-0.599128	0.0695091	-0.104223	0.781751	0.310023	0.0119703	-0.407095	-0.386903	-0.461729	0.157746	-0.0200202	0.608985	NaN	0.485963	0.523244	-0.337506	-0.0121983	-0.0283273	0.385563	-0.770135	NaN	0.585005	NaN	0.861496	-0.262624	-0.0994665	-1.01198	0.550903	-0.0226917	0.391249	0.659302	0.0488465	0.658402	0.236811	NaN	-0.321539	7308	Q9NPI1;Q9NPI1-2	Q9NPI1;Q9NPI1-2	Bromodomain-containing protein 7	BRD7	BRD7	0.0119703	0.142829	0.130859
-0.742827	-0.466164	2.22409	2.75081	3.14279	0.683669	1.43227	4.09216	2.16034	4.01342	2.57336	2.9352	2.86831	2.26058	2.25679	3.21472	2.16524	-1.42655	0.0198446	-0.40131	2.71243	0.873335	0.330279	1.62148	3.36085	3.46235	1.78392	-0.696685	NaN	3.25988	3.31761	2.62868	-2.49042	0.494906	1.44708	3.09986	3.12259	1.64456	2.1706	NaN	0.596003	6053	Q96CX2;Q68DU8;Q6ZWB6	Q96CX2	BTB/POZ domain-containing protein KCTD12	KCTD12	KCTD12	2.26058	1.71424	-0.546345
NaN	NaN	NaN	0.549148	-0.474364	NaN	NaN	NaN	NaN	0.657816	NaN	-0.426951	NaN	-0.663673	NaN	-0.11925	-0.497961	NaN	NaN	NaN	NaN	NaN	NaN	NaN	-0.00866695	NaN	NaN	NaN	NaN	-0.142426	-0.268093	NaN	NaN	NaN	NaN	NaN	-0.139603	NaN	NaN	NaN	-1.08848	7600	Q9NXV2	Q9NXV2	BTB/POZ domain-containing protein KCTD5	KCTD5	KCTD5	-0.426951	-0.142426	0.284526
0.14868	0.149882	0.084086	-0.165361	-0.0960674	-0.252814	-0.104237	-0.0547911	0.286743	0.123181	-0.17446	-0.28626	-0.258536	-0.272778	-0.0840148	0.0957428	0.274259	0.0952215	-0.24042	-0.131732	-0.182221	0.230176	-0.189872	0.388235	-0.107573	0.28043	0.420087	0.287561	0.27161	-0.270285	0.104934	-0.262426	0.289025	-0.122632	0.360961	0.306582	0.0623958	0.0552836	-0.022163	0.502136	-0.175839	593	O43670-2;O43670;O43670-4;O43670-3	O43670-2;O43670;O43670-4	BUB3-interacting and GLEBS motif-containing protein ZNF207	ZNF207	ZNF207	-0.0960674	0.0954822	0.19155
-0.354923	NaN	NaN	-0.391721	0.544883	NaN	NaN	NaN	-0.442382	0.0358296	NaN	-0.752988	-0.566	NaN	NaN	-0.686221	NaN	NaN	NaN	0.0509915	1.50337	-0.183804	NaN	NaN	NaN	-0.119665	0.174573	-0.377668	NaN	NaN	NaN	0.681375	0.17094	NaN	-0.105231	0.371042	-0.146454	NaN	NaN	0.182303	-0.474335	6589	Q9BRD0;Q9BRD0-2	Q9BRD0;Q9BRD0-2	BUD13 homolog	BUD13	BUD13	-0.391721	-0.0271195	0.364602
-0.245239	-0.299678	-1.67886	-1.25769	0.0395571	-0.652158	-1.87934	-1.13627	0.297867	-0.608551	-1.48368	-1.50999	-1.06835	-1.72237	-0.753477	-0.715839	-0.105354	-0.617086	-0.468663	0.271561	-0.230615	-0.186298	0.311902	-0.18634	-1.23383	-0.576133	-0.154553	0.269946	0.291091	-1.35559	-0.44766	-1.1288	0.0377655	-0.72237	0.483947	0.0531585	-0.721508	-0.310423	-0.843276	0.31483	0.048272	8246	Q9Y3A2;Q9Y3A2-2	Q9Y3A2;Q9Y3A2-2	Probable U3 small nucleolar RNA-associated protein 11	UTP11L	UTP11L	-1.06835	-0.208478	0.859872
-0.0512925	-1.76376	-1.53089	-0.8132	-0.993182	0.108419	-0.51576	-0.557752	-0.947385	-1.45008	-0.763968	-0.401157	-0.428934	-0.773476	-1.36359	-0.0826052	-0.556007	-0.634747	-0.554419	-1.52813	-0.565843	-1.65406	-0.373179	-0.734457	-0.0898989	-1.67879	-0.0331001	-1.17201	-0.683393	-0.596007	-0.174209	-1.10525	-0.899803	-0.998429	-1.34711	-0.739403	-1.63446	-1.53226	-0.143338	-1.19779	-0.728664	1597	P11586	P11586	C-1-tetrahydrofolate synthase, cytoplasmic;Methylenetetrahydrofolate dehydrogenase;Methenyltetrahydrofolate cyclohydrolase;Formyltetrahydrofolate synthetase;C-1-tetrahydrofolate synthase, cytoplasmic, N-terminally processed	MTHFD1	MTHFD1	-0.773476	-0.73156	0.0419157
NaN	NaN	NaN	NaN	NaN	NaN	NaN	NaN	1.25562	0.028829	0.453549	0.573727	NaN	0.699772	NaN	NaN	NaN	NaN	0.99472	NaN	NaN	NaN	NaN	NaN	NaN	-0.227433	NaN	NaN	NaN	NaN	-0.310718	NaN	-0.557483	NaN	0.529703	NaN	0.261649	NaN	NaN	NaN	NaN	333	O14523;O14523-2	O14523;O14523-2	C2 domain-containing protein 2-like	C2CD2L	C2CD2L	0.573727	0.0171078	-0.55662
-0.384028	-0.376559	0.365939	0.113351	-0.361005	0.0921191	0.000655865	0.322581	-0.373154	0.668969	-0.097331	0.491978	-0.0335892	0.170362	-0.162685	-0.446747	-0.314252	-0.151553	-0.00641311	0.527971	-0.403849	0.453205	-0.394312	0.028747	0.211282	-0.324775	-0.429277	-0.0856622	-0.220428	-0.0371808	-0.0283635	-0.988598	0.0492845	0.324493	0.465837	-0.266671	0.467613	0.286889	-0.350696	-0.0298164	-0.39638	5060	Q86YS7;Q86YS7-3;Q86YS7-2;Q86YS7-4;Q86YS7-5	Q86YS7;Q86YS7-3;Q86YS7-2;Q86YS7-4;Q86YS7-5	C2 domain-containing protein 5	C2CD5	C2CD5	0.000655865	-0.0614215	-0.0620773
-2.48801	-1.6873	-1.97167	-1.91807	-2.26253	-2.288	-3.00365	-2.2961	-2.19676	-1.73564	-2.05742	-2.3546	-2.30838	-2.22418	-2.37066	-2.85651	-2.22501	-2.24713	-2.15762	-1.16845	-2.22772	-1.10065	-2.66734	-1.84902	-2.09038	-1.94502	-2.19801	-1.27455	-1.75613	-2.62553	-2.86272	-2.41876	-1.98778	-1.46566	-1.83777	-2.19733	-1.70566	-2.00438	-2.56529	-1.05679	-2.4422	900	O75844	O75844	CAAX prenyl protease 1 homolog	ZMPSTE24	ZMPSTE24	-2.26253	-2.124	0.138536
-0.361762	0.307916	-0.104938	-0.181836	0.106004	-0.365775	0.778728	0.499452	0.29933	0.28432	0.40274	-0.669485	NaN	-0.128979	0.0556546	-0.516548	0.174457	-0.00187511	0.139476	0.510098	-0.0676973	0.251012	-0.249111	0.725224	-0.390987	0.886655	0.0134585	-0.132714	0.682066	-0.0665973	-0.0102803	0.037154	NaN	NaN	NaN	0.738449	0.48542	0.566447	NaN	0.546002	-0.113443	8142	Q9Y256	Q9Y256	CAAX prenyl protease 2	RCE1	RCE1	0.0808294	0.0883151	0.00748573
NaN	0.779313	-0.748466	-0.24087	0.130454	NaN	-0.0943724	-0.260058	0.639428	0.733276	-0.502624	-0.295244	NaN	-0.0772971	0.352544	0.00480299	0.231656	0.0115081	-0.354176	NaN	-0.00424434	0.657344	NaN	0.031916	NaN	-0.138694	0.441937	0.217067	0.932757	-0.451207	0.437027	0.328603	0.219944	0.0839035	0.416013	0.571386	0.0192957	0.394474	-0.472484	0.7526	0.0869421	5681	Q8WUQ7;Q8WUQ7-2	Q8WUQ7;Q8WUQ7-2	Cactin	CACTIN	CACTIN	-0.0858348	0.217067	0.302901
-1.21816	-1.96894	-1.50225	-1.77561	-1.81228	-0.629304	-1.64909	-1.55384	-1.64034	-1.68656	-1.45815	-0.918931	-1.13518	-1.34675	-1.31929	-1.02092	-1.37662	-0.81575	-1.20887	-1.47004	-1.53168	-1.74426	-1.03048	-1.39468	-1.1822	-1.91907	-1.15147	-1.44565	-0.992672	-1.2244	-1.23734	-1.97295	-1.24059	-1.28643	-1.99244	-1.7059	-1.94743	-1.65136	-1.06778	-1.71268	-1.14211	2063	P27708	P27708	CAD protein;Glutamine-dependent carbamoyl-phosphate synthase;Aspartate carbamoyltransferase;Dihydroorotase	CAD	CAD	-1.50225	-1.33153	0.170723
-1.56855	-0.11779	0.610499	-0.0239658	-0.995586	1.26015	0.371586	1.87461	1.58954	1.96015	-1.85399	0.529826	0.211242	0.563419	0.466745	1.18835	0.258632	-0.432312	0.449865	0.532477	-0.386844	0.776524	-3.11043	-0.649976	0.51417	0.830802	-0.865807	-0.806137	-1.64936	0.0325765	1.20911	0.104304	-0.776576	0.914115	0.495812	1.41283	0.8065	0.587851	0.143861	-0.400614	-0.588023	6492	Q99653	Q99653	Calcineurin B homologous protein 1	CHP1	CHP1	0.466745	0.201246	-0.265499
-0.766948	-2.48684	-1.45264	-1.47942	-1.62418	0.0615514	-3.80331	-2.22585	-3.58625	-3.38348	-0.66907	-0.669588	-1.19678	-0.824626	-1.05781	-4.14502	-3.46652	NaN	-0.249121	NaN	-0.461234	-0.490581	-1.6087	-3.42939	-2.1005	-2.38604	NaN	-1.12875	-0.402021	-1.38809	-4.34317	NaN	NaN	-0.552163	-1.973	-3.22398	-2.31975	-1.55241	-1.63509	-1.05414	-2.4634	6008	Q96BS2;Q96BS2-3;Q96BS2-2	Q96BS2;Q96BS2-3;Q96BS2-2	Calcineurin B homologous protein 3	TESC	TESC	-1.45264	-1.63509	-0.182449
NaN	-0.457712	0.0233497	0.0937034	-0.328878	0.168931	0.197078	0.309559	-0.647429	-0.298772	0.0865896	0.211157	0.217179	0.452417	0.0711009	0.181038	-0.139272	0.311946	0.125652	0.142671	0.445286	NaN	-0.107584	-0.55414	0.117081	-0.762588	0.373	-0.668604	-0.683476	0.225244	0.0492752	NaN	-0.29317	-0.153181	-0.593621	-0.122473	-0.268683	-0.36422	0.551932	NaN	-0.0295207	3069	P63098	P63098	Calcineurin subunit B type 1	PPP3R1	PPP3R1	0.0901465	-0.107584	-0.197731
-0.376949	NaN	-0.0177275	0.0468778	0.187943	-1.17092	0.259579	0.284922	0.205593	0.0361715	-0.216213	-0.0631219	-0.528615	0.556463	-0.393852	-0.139985	-0.189677	NaN	-0.839329	NaN	-0.0804608	0.535977	NaN	-0.94935	0.349034	-0.559589	-0.199807	0.15048	-0.199261	-0.0728002	-0.230107	-1.03483	0.143549	1.29942	1.0366	0.577343	0.233239	0.317288	0.224058	-0.517725	-0.87238	6522	Q99828;Q99828-2	Q99828;Q99828-2	Calcium and integrin-binding protein 1	CIB1	CIB1	0.009222	-0.0804608	-0.0896828
0.250468	0.298811	-0.242622	-0.39909	0.205593	-0.463389	-0.398839	-0.349046	0.415871	0.0234745	-0.335203	-0.468562	-0.280984	-0.439709	-0.117466	-0.288233	0.22373	-0.0564037	-0.111088	0.366888	-0.141239	0.284116	0.0385398	0.21701	-0.584885	0.062079	0.367976	0.709663	0.59888	-0.427826	0.0236721	-0.648014	0.497103	-0.0211158	0.323943	0.396621	0.0682734	0.295939	-0.0174534	0.527164	-0.0454783	5136	Q8IWX8	Q8IWX8	Calcium homeostasis endoplasmic reticulum protein	CHERP	CHERP	-0.280984	0.0651762	0.346161
NaN	0.953484	0.542356	NaN	1.56654	0.903843	1.23958	NaN	NaN	0.947544	NaN	NaN	0.710041	NaN	1.19196	0.680969	NaN	1.41085	1.60113	2.09105	NaN	NaN	-0.772182	0.79932	NaN	1.37082	NaN	NaN	1.86997	0.767927	NaN	NaN	0.96569	0.761467	NaN	-0.423828	1.60454	1.06759	0.27567	NaN	1.20184	2544	P49069	P49069	Calcium signal-modulating cyclophilin ligand	CAMLG	CAMLG	0.950514	1.01664	0.0661252
-0.357361	0.0403585	0.590305	0.448218	-0.794127	0.719066	0.103513	0.0911425	-0.40449	0.407491	0.0318503	0.477982	0.184619	0.607392	0.413275	-0.263648	-0.593986	-0.471821	0.869007	-0.293885	0.24156	0.551985	-0.179824	-0.727211	0.116605	-0.175764	-0.12673	-0.0636258	-0.167212	0.262238	-0.726578	0.116136	-0.490035	1.73367	0.797495	-0.309335	0.395763	0.466398	1.3286	-0.119659	-0.357309	5470	Q8NE86-3;Q8NE86;Q8NE86-2	Q8NE86-3;Q8NE86;Q8NE86-2	Calcium uniporter protein, mitochondrial	MCU	MCU	0.184619	-0.123194	-0.307814
-0.609217	-0.505982	0.0887547	0.258492	-1.20846	-0.443825	-0.273968	0.167865	-1.02988	-0.472893	-0.0986492	-0.0301005	0.0525517	0.342253	-0.0345002	-0.413117	-0.905179	-0.895056	-0.220386	-0.440911	0.0384685	-0.340744	-1.08142	-1.32308	-0.112725	-0.303221	-0.341004	-0.480774	-0.709768	-0.0242383	-0.681391	-0.124881	-0.871569	1.15862	0.271064	-0.946025	0.0752129	0.131807	0.659281	NaN	-0.80787	6546	Q9BPX6;Q9BPX6-3;Q9BPX6-2;Q9BPX6-5;Q9BPX6-4	Q9BPX6;Q9BPX6-3;Q9BPX6-2;Q9BPX6-5;Q9BPX6-4	Calcium uptake protein 1, mitochondrial	MICU1	MICU1	-0.0986492	-0.341004	-0.242354
NaN	-0.55616	0.234768	-0.0501009	-1.40475	-0.0367994	-0.730766	-0.458607	NaN	-0.127172	-0.483376	-0.181102	-0.598569	-0.172071	-0.464195	-1.0664	-0.704809	-1.48517	0.00625006	NaN	-0.41698	NaN	NaN	-1.67302	-0.411478	-0.388606	-0.315895	NaN	-0.741652	-0.156635	NaN	-0.29506	-0.813518	0.907486	-0.0619703	-0.904673	-0.177917	-0.790144	0.608687	-0.215171	NaN	5200	Q8IYU8	Q8IYU8	Calcium uptake protein 2, mitochondrial	MICU2	MICU2	-0.458607	-0.400042	0.0585652
NaN	NaN	0.122284	NaN	-0.108022	0.0926054	0.495181	0.947516	-0.288287	0.657644	0.508567	0.648509	0.743419	1.09337	1.21801	0.549255	-0.0626028	NaN	NaN	NaN	0.670206	1.77926	0.524213	0.150544	0.699119	-0.331848	NaN	NaN	NaN	0.326504	-0.552163	0.375735	NaN	0.586406	NaN	0.0567724	NaN	NaN	NaN	NaN	-0.38243	6387	Q96RR4-6;Q96RR4-5;Q96RR4-2;Q96RR4-3;Q96RR4-4;Q96RR4-7;Q96RR4	Q96RR4-6;Q96RR4-5;Q96RR4-2;Q96RR4-3;Q96RR4-4;Q96RR4-7;Q96RR4	Calcium/calmodulin-dependent protein kinase kinase 2	CAMKK2	CAMKK2	0.578538	0.351119	-0.227419
0.815207	0.762988	0.0883294	-0.195904	1.49818	0.717443	-0.710945	-0.483349	0.847763	-0.00950607	-0.856014	-0.12825	0.324722	-0.370173	0.760217	0.0196163	1.03363	0.539999	1.12081	1.46392	1.07581	0.957905	1.94055	0.319407	0.186724	-0.380605	0.392166	1.2598	2.50892	0.20299	0.498738	-0.0858341	1.77319	0.896188	1.17986	1.05599	0.457838	0.819088	0.927935	1.22566	1.22106	6542	Q9BPW8	Q9BPW8	Protein NipSnap homolog 1	NIPSNAP1	NIPSNAP1	0.0883294	0.94292	0.85459
-1.3519	-1.92122	-0.331371	-0.0571587	-3.21895	-2.12048	-0.169127	-1.17465	-1.21553	-0.702641	-2.47615	-0.667025	-1.03593	-0.529273	-1.00864	-1.22036	-1.76233	-1.41963	-1.78758	-0.738302	-0.516356	-0.290111	-1.16119	-1.26854	-1.06355	-1.01743	-0.397997	-0.490923	-2.32154	-1.0802	-3.00936	-1.76549	-0.784876	-1.02688	-0.371434	-2.3682	-1.51518	-0.56214	-1.04256	-0.704129	-2.16576	3606	Q13557-8;Q13557-12;Q13557;Q13557-10;Q13557-6;Q13557-11;Q13557-9;Q13557-5;Q13557-3;Q13557-4;Q9UQM7;Q9UQM7-2	Q13557-8;Q13557-12;Q13557;Q13557-10;Q13557-6;Q13557-11;Q13557-9;Q13557-5;Q13557-3;Q13557-4	Calcium/calmodulin-dependent protein kinase type II subunit delta	CAMK2D	CAMK2D	-1.03593	-1.07187	-0.0359442
0.566801	0.620263	0.83957	0.568738	1.38703	0.25865	0.761966	0.704254	1.07317	0.856395	0.522476	0.704574	0.858272	0.82917	1.07039	0.833497	1.04374	0.483056	0.864518	0.707347	1.5321	1.21951	0.949797	0.86164	0.813365	0.557291	1.45742	1.01692	1.24407	0.369235	0.932649	0.444471	1.06483	1.21684	1.23604	1.05124	1.19	1.22454	0.9942	0.888359	0.569116	3605	Q13555-4;Q13555-10;Q13555-5;Q13555-2;Q13555-8;Q13555;Q13555-6;Q13555-3;Q13555-7;Q13555-9;Q13554-7;Q13554-4;Q13554-6;Q13554-3;Q13554-8;Q13554-5;Q13554-2;Q13554	Q13555-4;Q13555-10;Q13555-5;Q13555-2;Q13555-8;Q13555;Q13555-6;Q13555-3;Q13555-7;Q13555-9	Calcium/calmodulin-dependent protein kinase type II subunit gamma	CAMK2G	CAMK2G	0.761966	0.971998	0.210032
-0.199629	-0.308715	-0.634265	-0.792801	-0.406692	-0.915356	-0.194406	-0.861314	-0.0646044	-1.28658	-0.42957	-0.586152	-0.825564	-0.778303	-0.12192	-0.69354	-0.120741	-0.0215955	-0.713237	-0.0850073	-0.208877	-0.943723	-0.305446	-0.377308	-0.89474	-0.607336	-0.476651	-1.10248	-0.348454	-0.350629	-0.226246	-0.964898	-0.949867	-0.166119	-0.540723	0.372903	-0.431856	-0.354102	NaN	-0.0662788	-0.160008	3506	Q13137-4;Q13137-2;Q13137;Q13137-3;Q13137-5	Q13137-4;Q13137-2;Q13137;Q13137-3;Q13137-5	Calcium-binding and coiled-coil domain-containing protein 2	CALCOCO2	CALCOCO2	-0.586152	-0.354102	0.23205
0.519447	0.872802	0.462237	0.136116	0.967256	0.655418	0.355164	0.372231	0.823006	0.693155	0.354369	0.267743	0.588094	0.465413	0.45419	0.260038	0.829014	0.0122145	0.864191	0.831488	0.74416	0.98526	1.45374	-0.0822001	0.420641	0.449069	0.56129	1.2855	1.63621	0.500233	0.991748	0.453037	0.919531	0.526706	1.72085	0.677681	0.54128	0.627633	0.805837	0.961103	0.845544	885	O75746;O75746-2	O75746;O75746-2	Calcium-binding mitochondrial carrier protein Aralar1	SLC25A12	SLC25A12	0.465413	0.774999	0.309585
-0.443425	-0.383571	-0.37783	-0.482482	-0.148499	0.137447	-0.93726	-0.190511	0.39068	0.0108028	-0.764882	-0.575461	-0.387527	-0.63609	-0.332181	-0.411247	0.3577	-0.181027	0.275401	0.440155	-0.0927297	0.275386	0.243646	-0.542735	-0.849932	-0.212699	-0.343691	0.484954	0.894249	-0.480831	-0.0954116	-0.444415	0.624465	-0.454189	0.336658	0.402153	-0.156741	0.245357	-0.29162	0.302673	0.343595	7931	Q9UJS0;Q9UJS0-2	Q9UJS0;Q9UJS0-2	Calcium-binding mitochondrial carrier protein Aralar2	SLC25A13	SLC25A13	-0.383571	0.0754582	0.459029
0.960694	0.958156	1.59728	1.06276	0.813356	0.267946	1.21169	1.72133	2.11845	2.2276	1.21814	1.06094	1.19702	1.25304	1.4919	1.74623	2.03558	0.185042	0.815514	1.13821	1.39895	1.46249	1.12997	0.806128	1.0086	2.14944	0.971895	1.54002	0.532997	1.50243	2.03917	0.895766	0.627271	0.832876	1.14202	2.14803	1.86459	2.17366	1.22443	0.984878	0.801808	4540	Q6NUK1;Q6NUK1-2	Q6NUK1;Q6NUK1-2	Calcium-binding mitochondrial carrier protein SCaMC-1	SLC25A24	SLC25A24	1.21169	1.14011	-0.0715746
0.0627501	-0.129419	0.0845493	0.917746	-0.217819	0.437058	1.03705	0.786895	-0.986678	-0.457517	1.12779	0.670845	0.656797	0.591633	-0.185004	0.225683	-0.00150131	0.208963	-0.0265447	-1.23027	0.309057	-1.19554	-0.485845	0.00829315	1.08636	-0.286402	0.256919	-0.630471	-0.815016	0.649403	0.0825575	0.897725	-0.837812	-0.497956	-0.498649	-0.270786	-0.0657076	-0.539082	0.505947	-0.948854	0.0914105	8240	Q9Y376	Q9Y376	Calcium-binding protein 39	CAB39	CAB39	0.437058	-0.0461261	-0.483184
0.696672	-1.2166	-1.43054	-0.331779	-1.14548	-0.489299	0.86075	0.212205	-0.36609	-1.66641	0.474616	0.212362	0.019516	0.163704	-1.23787	0.168215	0.226314	-0.475411	-1.3872	-1.89719	-0.567561	-0.928562	-1.7697	-0.998766	0.231921	-1.50923	0.386664	-0.210715	-0.89478	-0.125715	-0.0769182	0.0848519	-1.00557	-0.583631	-0.806295	-0.651789	-1.84037	-1.55211	0.357936	-0.820295	-1.21857	8211	Q9Y2V2	Q9Y2V2	Calcium-regulated heat stable protein 1	CARHSP1	CARHSP1	-0.331779	-0.729042	-0.397263
0.779772	0.706138	0.404178	0.109698	0.78988	1.79538	0.208548	0.427937	1.33699	1.20499	0.140603	0.607633	0.771788	0.557215	0.806178	0.101394	0.776949	-0.0912836	2.27542	1.1333	0.181905	1.29187	1.27073	0.060444	0.658889	1.13222	0.27322	0.404173	1.05447	0.443537	0.707546	0.141891	1.2395	0.303349	NaN	0.741564	1.0239	1.42578	0.184232	1.18749	0.881989	3190	P98194-4;P98194;P98194-2;P98194-3;P98194-5;P98194-9;P98194-6;P98194-7;P98194-8	P98194-4;P98194;P98194-2;P98194-3;P98194-5;P98194-9;P98194-6;P98194-7;P98194-8	Calcium-transporting ATPase type 2C member 1	ATP2C1	ATP2C1	0.706138	0.741564	0.0354261
-2.12206	-1.56781	-1.72497	-1.3303	-2.19624	-1.06858	-0.670239	-1.12587	-1.80881	-1.23137	-0.881272	-1.03043	-1.37518	-1.35251	-1.68012	-1.53924	-1.59998	-1.78986	-1.8541	-1.60177	-2.06497	-2.37412	-1.79957	-1.41278	-1.07972	-1.38961	-1.61274	-1.6929	-1.73097	-1.09168	-1.69382	-1.4852	-1.94815	-2.30224	-2.25678	-1.71801	-1.61064	-1.35289	-1.88825	-2.03583	-1.52472	7207	Q9HB71;Q9HB71-3;Q9HB71-2	Q9HB71;Q9HB71-3	Calcyclin-binding protein	CACYBP	CACYBP	-1.35251	-1.69336	-0.340855
NaN	NaN	2.92485	NaN	NaN	3.80322	NaN	NaN	NaN	NaN	1.43493	2.12233	2.15911	NaN	2.13247	NaN	NaN	1.47144	3.7539	NaN	NaN	3.61658	2.51965	NaN	1.43304	NaN	NaN	NaN	NaN	NaN	NaN	NaN	1.35957	NaN	0.241394	-0.492149	NaN	NaN	NaN	NaN	2.80831	3326	Q05682-4;Q05682-5;Q05682-6;Q05682-2;Q05682;Q05682-3	Q05682-4;Q05682-5;Q05682-6;Q05682-2;Q05682;Q05682-3	Caldesmon	CALD1	CALD1	2.14579	1.47144	-0.674354
0.174258	-0.183239	0.455957	0.730427	0.152753	0.526614	0.708938	0.9955	-0.243644	0.262028	0.689626	0.740755	0.527032	0.573968	0.217296	0.942589	0.201694	0.508933	0.534598	-0.672429	0.506255	-0.418233	-0.0838842	0.0706397	0.895495	-0.0211388	0.519416	-0.13874	-0.363259	0.380548	0.563709	0.477477	-0.352652	0.106494	-0.0934214	0.153546	0.0812923	-0.123133	0.575791	-0.602745	0.0428681	1532	P0DP25;P0DP24;P0DP23;P27482;P02585	P0DP25;P0DP24;P0DP23	Calmodulin	CALM3; CALM2; CALM1	CALM3	0.526614	0.0938932	-0.432721
-0.519987	0.0761937	-0.0127386	-0.319662	-0.243959	-0.131078	-0.311193	-0.127778	-0.136251	0.10023	-0.496978	-0.297381	-0.5127	-0.306335	-0.0741978	-0.362877	-0.495221	-0.331553	-0.156689	-0.0172629	0.0264812	0.252701	-0.645689	-0.548598	-0.463887	-0.102399	-0.908086	-0.721573	-0.170317	-0.503984	-0.470881	-0.557822	-0.443687	0.63384	-0.031839	-0.300361	0.144247	-0.330854	0.117993	0.203102	-0.819121	2068	P27824;P27824-2;P27824-3	P27824;P27824-2;P27824-3	Calnexin	CANX	CANX	-0.243959	-0.331204	-0.0872452
0.982344	0.581178	1.44447	1.42225	0.889438	1.49658	1.86026	1.75127	1.05751	1.36909	1.5206	1.46719	1.35697	1.33858	0.892625	1.81012	1.14164	1.14895	1.47419	0.00721728	1.16295	0.351819	0.928481	1.07322	1.59013	1.44868	0.94517	0.37546	0.0770426	1.49725	1.57948	1.55496	0.338147	0.870356	0.385637	0.844277	0.943177	0.985569	0.994814	0.0568115	0.990111	1299	P04632;Q96L46	P04632	Calpain small subunit 1	CAPNS1	CAPNS1	1.36909	0.98784	-0.381248
1.24265	0.782807	1.32094	1.2282	1.17538	1.5318	1.49122	1.46466	1.04979	1.11133	1.30573	1.40016	1.3817	1.21358	0.99885	1.53542	1.25318	1.29788	2.139	0.357573	1.37232	0.460184	1.27393	1.23018	1.27842	1.04909	0.829992	0.578912	0.705687	1.29796	1.36415	1.24308	0.901998	1.40767	0.690929	0.954971	0.836702	1.04117	1.32103	0.276203	1.35193	1389	P07384	P07384	Calpain-1 catalytic subunit	CAPN1	CAPN1	1.24265	1.23663	-0.00602168
NaN	-0.39036	-0.794507	0.463307	-0.459633	NaN	NaN	NaN	NaN	NaN	0.556061	0.453003	NaN	0.369829	-0.465061	-0.375174	NaN	0.735868	NaN	NaN	0.00578682	-1.04532	-0.104588	0.13605	0.544834	-0.0291478	-0.14181	NaN	NaN	0.910994	0.266379	-0.252964	-1.43167	NaN	NaN	-0.537441	-0.523961	-0.62952	NaN	NaN	NaN	8458	Q9Y6W3	Q9Y6W3	Calpain-7	CAPN7	CAPN7	-0.0102657	-0.123199	-0.112933
-0.649943	-0.619204	-1.65618	-1.41076	-0.0312046	-1.26832	-1.51986	-1.07835	0.305023	-0.785624	-1.76587	-1.93663	-1.20919	-1.82256	-1.03845	-0.815615	-0.222014	-0.602374	-0.521307	-0.0708584	-0.300931	-0.40025	0.073431	-0.318821	-1.43401	-1.05087	-0.286718	-0.13598	0.29123	-1.42983	-0.302051	-1.12525	0.173542	-0.513816	0.465545	0.220845	-0.761294	-0.724892	-0.728708	0.0296307	-0.506255	3788	Q14692	Q14692	Ribosome biogenesis protein BMS1 homolog	BMS1	BMS1	-1.20919	-0.359535	0.849651
1.04678	0.358665	0.103802	0.993265	0.673079	1.69417	0.213633	0.745283	0.691396	-0.44564	0.882926	0.873044	1.29306	0.52251	0.347904	1.56477	1.15206	2.04641	1.55762	-1.25933	0.886789	-0.762413	0.907514	0.442657	1.18132	-0.413264	0.491622	-0.475834	-0.205673	0.772735	1.46529	0.807408	-0.403694	0.735853	0.299279	0.668672	-1.73254	-1.30254	0.850286	-0.720465	0.706996	6445	Q99439;Q99439-2;REV__O00444-3	Q99439;Q99439-2	Calponin-2	CNN2	CNN2	0.691396	0.687834	-0.00356227
-0.883941	-0.0937239	-0.850151	-0.687532	0.229845	-0.893884	-0.80123	0.0716463	-0.453984	-0.408218	-0.557748	-0.69486	-0.825379	-0.965018	-0.747211	-0.443688	-0.666475	-0.386746	-0.451034	-0.288816	-0.351363	-0.543275	-1.45961	-0.169474	-1.0157	-0.278415	-1.62565	-1.02306	-1.51365	-0.630554	-0.410423	-1.06065	-0.391475	-0.784878	-1.18531	-0.680941	-0.3494	-0.850488	-0.939501	-0.199695	-1.04757	2064	P27797	P27797	Calreticulin	CALR	CALR	-0.69486	-0.648515	0.0463451
-1.11211	-0.735476	-2.25898	-1.45906	-0.223228	-1.04058	-1.74323	-1.72794	-0.323749	-1.02863	-1.95723	-2.30125	-1.35924	-1.95226	-1.44814	-1.18989	-0.626189	-0.571352	-0.66621	0.100872	-0.695835	-0.413469	-0.0499875	-0.366867	-1.86311	-1.20716	-0.511897	0.0014979	-0.0778899	-1.83899	-0.509144	-1.37057	-0.0454009	-0.785468	0.393286	-0.118672	-0.926653	-0.780742	-0.935758	-0.18548	-0.770895	6624	Q9BSC4;Q9BSC4-4;Q9BSC4-2;Q9BSC4-3	Q9BSC4;Q9BSC4-4;Q9BSC4-2	Nucleolar protein 10	NOL10	NOL10	-1.44814	-0.59877	0.849366
-0.462021	-0.615106	-2.02579	-1.5767	-0.402405	NaN	-2.48458	-1.35716	0.0636059	-0.807335	-1.75712	-1.38859	-1.14518	-1.40132	-0.701131	-1.44031	-0.193201	-1.46129	-0.326565	0.597545	-0.502628	-0.120187	-0.0137611	0.174893	-2.31357	-1.13942	-1.26493	-0.557733	-0.241484	-1.67705	-0.0435736	-2.49765	0.256627	-0.543627	-0.0332658	-0.46423	-0.964542	-0.341261	-0.872702	0.0190442	-0.211667	1969	P23434	P23434	Glycine cleavage system H protein, mitochondrial	GCSH	GCSH	-1.25117	-0.402745	0.848424
0.975677	0.713432	1.25551	1.31051	0.791868	1.56959	1.24637	1.46558	0.573813	1.16324	1.19101	1.23	1.44805	0.948846	1.34014	1.13281	0.878608	1.52577	1.75167	0.582349	1.17664	1.00621	1.47093	0.720134	1.49346	1.08569	0.935162	0.442869	0.425868	1.32023	1.01902	1.07551	0.54948	0.716167	0.725403	0.551926	1.05252	0.807693	0.921537	0.0493699	1.42712	1946	P22694-2;P22694-4;P22694-3;P22694;P22694-5;P22694-7;P22694-6;P22694-9;P22694-10;P22694-8	P22694-2;P22694-4;P22694-3;P22694;P22694-5;P22694-7;P22694-6;P22694-9;P22694-10;P22694-8	cAMP-dependent protein kinase catalytic subunit beta	PRKACB	PRKACB	1.23	0.970687	-0.259313
1.15101	0.672366	1.23137	1.5475	1.20738	1.79988	1.07202	1.76699	0.397936	1.46826	1.20459	1.39491	1.42018	1.07023	1.34558	1.22942	1.19285	1.7301	1.90321	0.373577	1.36642	0.653032	1.81531	0.631573	1.66573	0.69755	1.09508	0.403073	0.622069	1.18113	1.33228	1.22438	0.72183	0.486603	0.573459	0.465233	0.977589	0.546471	0.959738	-0.12096	1.18351	1558	P10644;P10644-2	P10644;P10644-2	cAMP-dependent protein kinase type I-alpha regulatory subunit;cAMP-dependent protein kinase type I-alpha regulatory subunit, N-terminally processed	PRKAR1A	PRKAR1A	1.23137	0.968664	-0.262709
[truncated: 4,490 more rows]
[truncated: 33 more columns]

## Sheet: 351 significant proteins
REL-FREE	REL-FREE	REL-FREE	REL-FREE	REL-FREE	REL-FREE	REL-FREE	REL-FREE	REL-FREE	REL-FREE	REL-FREE	REL-FREE	REL-FREE	REL-FREE	REL-FREE	RELAPSE	RELAPSE	RELAPSE	RELAPSE	RELAPSE	RELAPSE	RELAPSE	RELAPSE	RELAPSE	RELAPSE	RELAPSE	RELAPSE	RELAPSE	RELAPSE	RELAPSE	RELAPSE	RELAPSE	RELAPSE	RELAPSE	RELAPSE	RELAPSE	RELAPSE	RELAPSE	RELAPSE	RELAPSE	RELAPSE
[truncated: 352 more rows]
[truncated: 14 more columns]

[truncated: 1 more sheets: Main Data Label-free]
