# Supplementary material for: Proteome and Phosphoproteome Changes Associated with Prognosis in Acute Myeloid Leukemia
Source: Cancers (Basel). 2020 Mar 17;12(3):709. doi: 10.3390/cancers12030709 (PMC7140113; doi:10.3390/cancers12030709)
Supplement: Supplementary file 1 [file cancers-12-00709-s001.zip › Supplementary file 2 - Suppl information to Figure 2c.xlsx]

## Sheet: Details
Supplemental File 2 (Supplemental Information to Figure 2C)
The following tables "RNA_Proteins_Cluster 1" and "V-ATPase_Proteins_Cluster 3" are supplemental information to Figure 2C, showing the proteins they contain in detail and GO terms/Uniprot Keywords associated to the group of proteins.
The clusters displayed in Figure 2C was generated using the ClusterONE application in Cytoscape. To further characterizewhich GO terms and Uniprot Keywords that were associated to the proteins in the clusters, we used "a GO tool" (with the entire protein matrix (n=5309) as background).
The most significant term(s) (FDR) with the highest number of protein counts (i.e. number of proteins associated to the term) from biological processes (BP), molecular function (MF), cellular compartment (CC) and Uniprot Keywords enrichment are displayed in the following tables, and "X" means that the protein was associated to the term. The FDR from the individual GO analyses are displayed under …

## Sheet: RNA_Proteins_Cluster 1
Majority protein IDs	Protein names	Gene names	FC RELAPSE - REL_FREE	FC significance (Z-test p-value)	p-value	Supported with LF?	Ribosome biogenesis (Uniprot KW, FDR = 1.17E-35)	rRNA processing (Uniprot KW, FDR = 1.03E-32)	rRNA metabolic process (GO BP, FDR = 4.95E-56)	Nucleolus (GO CC, FDR=4.81E-55)	RNA binding (GO MF, FDR = 5.78E-33)
O43818	U3 small nucleolar RNA-interacting protein 2	RRP9	0.613481	0.0475373	0.0026268	Yes (p-value)		X	X	X	X
Q9Y4W2-2;Q9Y4W2;Q9Y4W2-3	Ribosomal biogenesis protein LAS1L	LAS1L	0.623019	0.0448279	0.0173597	YES		X	X	X	X
Q9NVP1	ATP-dependent RNA helicase DDX18	DDX18	0.630626	0.0427575	0.00423484	Yes (p-value)				X	X
Q9Y5J1	U3 small nucleolar RNA-associated protein 18 homolog	UTP18	0.636283	0.0412684	0.0073408	YES		X	X	X	X
Q96G21	U3 small nucleolar ribonucleoprotein protein IMP4	IMP4	0.636747	0.0411482	0.0304272	Yes (p-value)	X	X	X	X	X
A6NHQ2	rRNA/tRNA 2-O-methyltransferase fibrillarin-like protein 1	FBLL1	0.638069	0.0408071	0.0320974	Yes (p-value)		X	X		X
Q9Y3A4	Ribosomal RNA-processing protein 7 homolog A	RRP7A	0.639499	0.0404407	0.0105212	YES			X		X
Q15269	Periodic tryptophan protein 2 homolog	PWP2	0.641735	0.0398732	0.00532514	Yes (p-value)			X		X
O15213	WD repeat-containing protein 46	WDR46	0.645877	0.0388392	0.00372803	YES			X	X	X
O00567	Nucleolar protein 56	NOP56	0.650065	0.037816	0.0192724	Yes (p-value)	X		X	X	X
Q9BV38	WD repeat-containing protein 18	WDR18	0.650233	0.0377755	0.0389477	YES			X	X
Q9H8H0	Nucleolar protein 11	NOL11	0.65537	0.0365517	0.00182216		X	X	X	X	X
Q13895	Bystin	BYSL	0.655844	0.0364404	0.000328992	Yes (p-value)	X		X	X	X
Q8TED0;Q8TED0-3;Q8TED0-2	U3 small nucleolar RNA-associated protein 15 homolog	UTP15	0.658501	0.0358218	0.00625086	YES	X	X	X	X	X
Q9H583	HEAT repeat-containing protein 1;HEAT repeat-containing protein 1, N-terminally processed	HEATR1	0.672867	0.0326246	0.0042426	YES	X	X	X	X	X
Q9Y2P8	RNA 3-terminal phosphate cyclase-like protein	RCL1	0.680836	0.0309548	0.00269965	YES	X		X	X
Q9H7B2	Ribosome production factor 2 homolog	RPF2	0.689746	0.0291724	0.00197668	YES	X		X	X	X
Q9Y2X3	Nucleolar protein 58	NOP58	0.693189	0.0285068	0.0178052	YES	X		X	X	X
Q8IZL8	Proline-, glutamic acid- and leucine-rich protein 1	PELP1	0.696256	0.0279248	0.0390522	YES			X	X	X
Q9BVJ6;Q9BVJ6-3;Q9BVJ6-2	U3 small nucleolar RNA-associated protein 14 homolog A	UTP14A	0.700256	0.0271805	0.00111326	YES	X		X	X	X
Q14137;Q14137-2	Ribosome biogenesis protein BOP1	BOP1	0.701955	0.0268692	0.000742446		X	X	X	X	X
Q12788	Transducin beta-like protein 3	TBL3	0.702021	0.0268573	0.0034101	YES			X	X	X
Q8NI36	WD repeat-containing protein 36	WDR36	0.704389	0.0264289	0.00156726	YES	X	X	X	X
Q9H9L3	Interferon-stimulated 20 kDa exonuclease-like 2	ISG20L2	0.714976	0.0245823	0.0269774		X		X	X	X
Q15061	WD repeat-containing protein 43	WDR43	0.720107	0.0237272	0.00783869	YES	X	X	X	X
P56182	Ribosomal RNA processing protein 1 homolog A	RRP1	0.726248	0.0227365	0.000705541	YES		X	X	X	X
Q15050	Ribosome biogenesis regulatory protein homolog	RRS1	0.734657	0.021437	0.00146281	YES	X			X	X
Q9NYH9	U3 small nucleolar RNA-associated protein 6 homolog	UTP6	0.737249	0.0210492	0.00356448	Yes (p-value)		X	X	X	X
O00566	U3 small nucleolar ribonucleoprotein protein MPP10	MPHOSPH10	0.742172	0.0203292	0.00403062	Yes (p-value)	X	X	X	X	X
Q9NW13;Q9NW13-2	RNA-binding protein 28	RBM28	0.750867	0.0191084	0.00359758	YES				X	X
O76021;O76021-2	Ribosomal L1 domain-containing protein 1	RSL1D1	0.752324	0.01891	0.00553982	Yes (p-value)			X	X	X
Q9NY93;Q9NY93-2	Probable ATP-dependent RNA helicase DDX56	DDX56	0.764976	0.0172602	0.00323515	Yes (p-value)	X	X	X	X	X
Q13601;Q13601-2	KRR1 small subunit processome component homolog	KRR1	0.770636	0.0165629	0.00577	YES	X	X	X	X	X
Q9UNX4	WD repeat-containing protein 3	WDR3	0.773978	0.0161627	0.0029987	YES			X	X
O75691	Small subunit processome component 20 homolog	UTP20	0.774613	0.0160875	0.00233649			X	X	X	X
Q68CQ4	Digestive organ expansion factor homolog	DIEXF	0.775922	0.0159336	0.0321452				X	X	X
Q9NV31	U3 small nucleolar ribonucleoprotein protein IMP3	IMP3	0.785028	0.0148976	0.0059769	YES	X	X	X	X	X
Q9GZL7	Ribosome biogenesis protein WDR12	WDR12	0.785815	0.0148108	0.000365036	Yes (p-value)	X	X	X	X
P46087;P46087-4;P46087-2;P46087-3	Probable 28S rRNA (cytosine(4447)-C(5))-methyltransferase	NOP2	0.793752	0.0139598	0.000584661	Yes (p-value)	X	X	X	X	X
Q9NXF1-2;Q9NXF1	Testis-expressed sequence 10 protein	TEX10	0.797673	0.0135552	0.0239463				X	X
Q9BYG3	MKI67 FHA domain-interacting nucleolar phosphoprotein	NIFK	0.810683	0.0122844	0.00464669	Yes (p-value)			X	X
Q9NV06	DDB1- and CUL4-associated factor 13	DCAF13	0.814798	0.0119045	0.00506985		X	X	X	X	X
Q9BVI4	Nucleolar complex protein 4 homolog	NOC4L	0.817434	0.0116666	0.00161076				X	X	X
Q03701	CCAAT/enhancer-binding protein zeta	CEBPZ	0.823931	0.0110977	0.000914548	YES					X
Q9NQ55-2;Q9NQ55;Q9NQ55-3	Suppressor of SWI4 1 homolog	PPAN	0.83315	0.010332	0.00221848	Yes (p-value)				X	X
Q9BSC4;Q9BSC4-4;Q9BSC4-2	Nucleolar protein 10	NOL10	0.849366	0.00909637	0.000707181	YES				X	X
Q14692	Ribosome biogenesis protein BMS1 homolog	BMS1	0.849651	0.00907587	0.00200651	YES	X		X	X	X
Q9Y3A2;Q9Y3A2-2	Probable U3 small nucleolar RNA-associated protein 11	UTP11L	0.859872	0.00836669	0.00495634	Yes (p-value)		X	X	X	X
Q8TDN6	Ribosome biogenesis protein BRX1 homolog	BRIX1	0.862956	0.00816252	0.0019879	YES	X			X	X
P78316;P78316-2	Nucleolar protein 14	NOP14	0.875633	0.00736844	0.00128563	YES	X	X	X	X	X
Q9H0A0;Q9H0A0-2	N-acetyltransferase 10	NAT10	0.883414	0.00691554	0.000869311	Yes (p-value)		X	X	X	X
Q9H9Y2	Ribosome production factor 1	RPF1	0.896097	0.00622978	0.00485246		X	X	X	X	X
Q8IY81	pre-rRNA processing protein FTSJ3	FTSJ3	0.904179	0.0058249	0.00461288		X	X	X	X	X
Q9NY61	Protein AATF	AATF	0.905739	0.00574951	0.000149995	Yes (p-value)				X	X
Q14690	Protein RRP5 homolog	PDCD11	0.915651	0.00529026	0.00144937	YES		X	X	X	X
Q9H0S4;Q9H0S4-2	Probable ATP-dependent RNA helicase DDX47	DDX47	0.932749	0.00457432	0.000911883	YES		X	X	X	X
Q96GQ7	Probable ATP-dependent RNA helicase DDX27	DDX27	0.935867	0.00445355	0.0010071	Yes (p-value)	X	X	X	X	X
Q9Y221;Q9Y221-2	60S ribosome subunit biogenesis protein NIP7 homolog	NIP7	0.938002	0.00437245	0.00526164	YES	X			X	X
Q8NEJ9-2;Q8NEJ9	Neuroguidin	NGDN	0.950202	0.003934	0.00142225	YES			X	X	X
Q9BVP2-2;Q9BVP2	Guanine nucleotide-binding protein-like 3	GNL3	0.960459	0.0035963	0.00136972	YES				X	X
Q92979	Ribosomal RNA small subunit methyltransferase NEP1	EMG1	0.961524	0.00356278	0.000655512	YES	X	X	X	X	X
Q15397	Pumilio domain-containing protein KIAA0020	KIAA0020	0.963784	0.00349255	0.00126128	YES				X	X
Q9Y3B9	RRP15-like protein	RRP15	0.971881	0.00325107	0.00101659	Yes (p-value)			X
Q9Y3T9	Nucleolar complex protein 2 homolog	NOC2L	0.972117	0.00324425	0.00105843	YES				X	X
Q9BXY0	Protein MAK16 homolog	MAK16	0.976743	0.00311338	0.00154745	YES			X	X	X
P42696;P42696-2	RNA-binding protein 34	RBM34	1.04203	0.00170989	0.00339378					X	X
Q99848	Probable rRNA-processing protein EBP2	EBNA1BP2	1.07523	0.00124438	0.00379877	YES	X		X	X	X
Q14684;Q14684-2	Ribosomal RNA processing protein 1 homolog B	RRP1B	1.08509	0.00113038	0.000116819	YES			X	X	X
Q8WTT2	Nucleolar complex protein 3 homolog	NOC3L	1.20701	0.000322959	0.00143669	YES				X	X

## Sheet: V-ATPase_Proteins_Cluster 3
Majority protein IDs	Protein names	Gene names	FC RELAPSE - REL_FREE	FC significance (Z-test p-value)	Welch's t-test p-value	Supported with LF?	Hydrogen ion transport (Uniprot KW, FDR = 4.08E-19)	Phagosome acidification (GO BP, FDR = 1.91E-20)	Lysosomal membrane (GO CC, FDR = 4.47E-12)	Proton-exporting ATPase activity (GO MF, FDR = 8.80E-18)
P38606;P38606-2	V-type proton ATPase catalytic subunit A	ATP6V1A	-0.617054	0.0397966	0.00662103	Yes (p-value)	X	X	X	X
Q9UI12-2;Q9UI12	V-type proton ATPase subunit H	ATP6V1H	-0.616759	0.0398638	0.0069546	YES	X	X	X	X
P21281	V-type proton ATPase subunit B, brain isoform	ATP6V1B2	-0.654121	0.0320688	0.00865165	YES	X	X	X	X
Q13488;Q13488-2	V-type proton ATPase 116 kDa subunit a isoform 3	TCIRG1	-1.3306	0.000134817	0.0139069	YES	X	X	X	X
P21283	V-type proton ATPase subunit C 1	ATP6V1C1	-0.816072	0.0112997	0.0187937		X	X	X	X
P61421	V-type proton ATPase subunit d 1	ATP6V0D1	-0.930904	0.00487931	0.020071	YES	X	X	X	X
O75348	V-type proton ATPase subunit G 1	ATP6V1G1	-0.769909	0.0154686	0.0201729	YES	X	X	X	X
Q9Y5K8	V-type proton ATPase subunit D	ATP6V1D	-0.616413	0.0399424	0.0238928	YES	X	X	X
P36543;P36543-2;P36543-3	V-type proton ATPase subunit E 1	ATP6V1E1	-0.589422	0.0464914	0.0302675	Yes (p-value)	X	X	X	X
