# Supplementary material for: Proteome and Phosphoproteome Changes Associated with Prognosis in Acute Myeloid Leukemia
Source: Cancers (Basel). 2020 Mar 17;12(3):709. doi: 10.3390/cancers12030709 (PMC7140113; doi:10.3390/cancers12030709)
Supplement: Supplementary file 1 [file cancers-12-00709-s001.zip › Supplementary file 3 - Phosphoproteomics data RELAPSE vs REL_FREE cohort.xlsx]

## Sheet: Details
MS phosphoproteome data from the 15 REL_FREE vs 26 RELAPSE patient cohort
Datasheet 5634 p-sites contains the phosphosites after selecting 5 quantified valid values of each phosphosite per group
All the information regarding these 5634 phosphosite was generated with Perseus software
Datasheet 274 significant p-sites contains regulated phosphosites after applying two variance t-test and Z-statistics

## Sheet: Main Data - 5364 p-sites
RELAPSE	RELAPSE	RELAPSE	RELAPSE	RELAPSE	RELAPSE	RELAPSE	RELAPSE	RELAPSE	RELAPSE	RELAPSE	RELAPSE	RELAPSE	RELAPSE	RELAPSE	RELAPSE	RELAPSE	RELAPSE	RELAPSE	RELAPSE	RELAPSE	RELAPSE	RELAPSE	RELAPSE	RELAPSE	RELAPSE	REL-FREE	REL-FREE	REL-FREE	REL-FREE	REL-FREE	REL-FREE	REL-FREE	REL-FREE	REL-FREE	REL-FREE	REL-FREE	REL-FREE	REL-FREE	REL-FREE	REL-FREE
P11	P12	P15	P17	P18	P19	P2	P20	P21	P22	P23	P26	P30	P32	P34	P37	P4	P40	P45	P48	P5	P50	P51	P52	P6	P9	P10	P13	P14	P24	P29	P3	P31	P36	P42	P43	P44	P46	P47	P49	P53	Median RELAPSE	Median REL-FREE	FC RELAPSE/REL-FREE	FC significance (Z-score)	P-value	Amino acid	Charge	Multiplicity	Motifs
0.516204	1.95493	1.14217	1.04326	-0.0294297	0.466015	-0.327468	0.119578	-0.0811609	0.462689	0.11273	0.168797	NaN	-0.494005	0.428096	0.48379	-0.0653718	-0.19317	0.590264	0.432464	0.0138176	0.168915	0.311927	0.666904	NaN	0.771378	2.82951	0.111193	0.339254	0.210433	0.102225	0.894553	0.342201	0.805485	-0.177655	0.761993	0.234811	0.604615	0.376707	0.421089	0.263337	0.370012	0.342201	0.0278102	0.472525	0.397447	S	3	___1	b-Adrenergic Receptor kinase substrate motif;Casein kinase I substrate motif;Casein kinase II substrate motif;Pyruvate dehydrogenase kinase substrate motif
2.07047	NaN	2.53933	3.42956	NaN	0.829847	NaN	2.86715	NaN	1.99934	NaN	0.573558	NaN	2.15992	0.629107	NaN	0.864861	0.220214	NaN	1.80775	0.624536	NaN	NaN	NaN	NaN	NaN	NaN	0.576708	NaN	0.705595	NaN	3.39965	0.631755	1.62372	NaN	NaN	NaN	0.916648	2.22274	NaN	-0.575187	1.80775	0.811122	0.996628	0.00157046	0.451863	T	3	___1	PKA kinase substrate motif;PKC kinase substrate motif
-1.0079	-1.69309	NaN	-0.780105	-1.20235	NaN	NaN	NaN	NaN	NaN	NaN	NaN	NaN	NaN	NaN	-1.90267	-2.48272	NaN	NaN	-1.36415	-1.95626	NaN	NaN	NaN	NaN	NaN	NaN	NaN	NaN	NaN	NaN	-1.10726	-0.421456	-1.59747	NaN	NaN	-1.5904	-1.23026	NaN	NaN	-1.78249	-1.52862	-1.41033	-0.118284	0.331022	0.376751	S	3	___1	ERK1,2 kinase substrate motif;Growth associated histone HI kinase substrate motif;GSK-3, ERK1, ERK2, CDK5 substrate motif;WW domain binding motif
0.289123	-0.110946	0.072897	0.340812	-0.785127	0.0437311	-0.560963	-0.751719	0.708839	0.0642448	0.180919	1.31561	NaN	-0.468906	-0.0352293	-0.120205	-0.360445	NaN	NaN	1.14378	-0.530805	-0.726146	0.393063	-0.0424378	NaN	0.4217	-0.576305	0.52999	NaN	0.637313	0.0884089	0.0515839	-0.455864	0.332936	-0.215845	0.658745	-0.0303466	0.240009	-0.793263	0.432246	0.210494	0.00425089	0.149451	-0.145201	0.306806	0.739644	S	2	___1	ERK1,2 kinase substrate motif;G protein-coupled receptor kinase 1 substrate motif;Growth associated histone HI kinase substrate motif;GSK3 kinase substrate motif;GSK-3, ERK1, ERK2, CDK5 substrate motif;PKA kinase substrate motif;PKC kinase substrate motif;WW domain binding motif
-2.40903	-1.76868	-0.718682	-3.36575	-3.14533	-2.10722	-2.87116	-2.04126	-1.62872	-0.571051	-4.63018	-0.779672	-2.04521	-2.00447	-2.44556	-2.72643	-2.46332	-1.98326	NaN	-0.432241	-1.74044	-4.27292	-1.72143	NaN	NaN	-3.0712	-1.67354	-2.85528	-2.82893	-1.13961	-2.52364	-1.16859	-1.30416	-2.85638	-3.79375	-3.43254	-2.61811	-1.77825	-1.75449	-1.13564	-2.40559	-2.04521	-2.40559	0.360381	0.169146	0.992519	S	2	___1	Casein kinase II substrate motif;PKA kinase substrate motif;PKC kinase substrate motif
-1.17006	-0.711497	0.0195471	-0.669679	-0.0648651	-0.756269	-0.452853	-0.871854	-0.295895	-1.56454	-0.671423	-0.318758	0.14172	-0.150546	-1.38225	-0.598531	-1.35942	-0.234576	-0.20922	-0.711011	-0.389016	-0.844289	-0.594079	-0.599193	NaN	NaN	NaN	-0.532301	-1.1806	-1.10682	-0.386408	-0.661079	-1.10084	-0.877648	-0.185853	NaN	-1.21004	-1.26825	NaN	NaN	-0.79448	-0.598862	-0.877648	0.278786	0.241475	0.102111	S	2	___1	ERK1,2 kinase substrate motif;GSK-3, ERK1, ERK2, CDK5 substrate motif;PKA kinase substrate motif;PKC kinase substrate motif;WW domain binding motif
0.291716	0.447228	NaN	0.0585916	-0.999802	0.616976	2.50321	-1.16039	NaN	1.34488	1.21571	0.445122	NaN	-0.185464	0.792542	-0.350956	0.526947	-1.82474	0.417017	0.504305	-0.000824578	0.285448	1.18908	NaN	NaN	0.885718	NaN	1.85299	1.10572	0.863071	0.370804	NaN	1.35943	0.632956	-0.323429	1.7426	0.945074	0.711614	0.952486	1.29371	1.10984	0.445122	0.952486	-0.507364	0.0781541	0.0191862	S	2	___1	14-3-3 domain binding motif;Calmodulin-dependent protein kinase II substrate motif;Casein kinase II substrate motif;PKA kinase substrate motif;PKC kinase substrate motif;ZIP kinase substrate motif
-0.131766	-0.314834	0.743749	-0.619651	NaN	0.357672	0.190088	-1.20053	0.355976	0.412462	0.0397942	-0.265865	-1.27587	-1.14001	0.849091	-0.152839	0.402579	-1.78412	-0.274115	-0.304256	-0.5529	0.158943	-1.3848	-0.0725877	-0.857507	-0.271764	NaN	0.676486	0.627844	0.422684	-0.463861	-0.323371	0.475139	0.689143	-1.79074	0.620549	0.756459	NaN	0.0764437	1.06782	0.361059	-0.265865	0.475139	-0.741003	0.0224076	0.0442056	S	2	___2	DNA dependent Protein kinase substrate motif;G protein-coupled receptor kinase 1 substrate motif
-0.131766	-0.314834	0.743749	-0.619651	NaN	0.357672	0.180319	-1.20053	0.355976	0.412462	0.0397942	-0.265865	-1.27587	-1.14001	0.849091	-0.152839	0.402579	-1.78412	-0.274115	-0.304256	-0.5529	0.247388	-1.3848	-0.0725877	-0.857507	-0.271764	NaN	0.676486	0.761413	0.422684	-0.463861	-0.323371	0.475139	0.689143	-1.79074	0.634411	0.756459	0.779046	0.0764437	1.06782	0.361059	-0.265865	0.554775	-0.82064	0.0136545	0.0245166	T	2	___2	Casein kinase II substrate motif;G protein-coupled receptor kinase 1 substrate motif;GSK-3, ERK1, ERK2, CDK5 substrate motif;RAF1 kinase substrate motif;WW domain binding motif
NaN	NaN	NaN	NaN	NaN	0.573927	NaN	NaN	0.516181	1.01116	0.64507	NaN	NaN	NaN	NaN	0.724042	-0.182768	NaN	NaN	0.289576	1.62294	NaN	1.15325	0.747105	NaN	NaN	NaN	NaN	NaN	0.397568	0.779657	NaN	0.454778	1.23732	1.0811	NaN	0.667053	0.470164	NaN	NaN	NaN	0.684556	0.667053	0.0175032	0.462198	0.933686	S	3	___1	14-3-3 domain binding motif;Calmodulin-dependent protein kinase II substrate motif;Pim1 kinase substrate sequence;PKA kinase substrate motif;PKA, PKG kinase substrate motif;PKC epsilon kinase substrate motif;PKC kinase substrate motif;PKG kinase substrate motif
-1.14669	-1.13531	NaN	NaN	NaN	NaN	NaN	-0.646751	-0.433723	-1.61494	NaN	-0.730954	NaN	-0.392588	-1.68739	NaN	-1.19257	NaN	NaN	-0.23298	0.140438	-1.50037	NaN	NaN	NaN	-0.660535	NaN	-1.67689	-1.57435	NaN	-0.621597	NaN	-1.5192	-1.62464	NaN	NaN	NaN	NaN	NaN	NaN	NaN	-0.730954	-1.57435	0.843396	0.00670159	0.0596771	S	2	___1	Casein kinase I substrate motif;Casein kinase II substrate motif;G protein-coupled receptor kinase 1 substrate motif;PKA kinase substrate motif;PKC kinase substrate motif;Pyruvate dehydrogenase kinase substrate motif
-0.424949	-0.384404	NaN	0.0137006	-0.0173089	-0.449353	-0.422812	0.337317	-0.0088631	-0.95564	-1.04836	0.306782	NaN	0.208608	-1.49091	-0.481721	-0.75148	0.36841	NaN	0.00119625	0.510166	-0.533848	-0.361012	NaN	NaN	NaN	NaN	NaN	-1.58965	-1.45817	0.525379	NaN	-1.34917	-0.789265	0.230434	NaN	-2.03511	-0.0893476	NaN	-1.18914	-0.937503	-0.372708	-1.06332	0.690615	0.0230997	0.0639136	S	3	___2	Casein kinase I substrate motif;Casein kinase II substrate motif;MAPKAPK2 kinase substrate motif;Pyruvate dehydrogenase kinase substrate motif
-0.424949	-0.384404	NaN	0.0137006	-0.0173089	-0.449353	-0.422812	0.337317	-0.0088631	-0.95564	-1.04836	0.306782	NaN	0.208608	-1.49091	-0.481721	-0.75148	0.36841	NaN	0.00119625	0.510166	-0.533848	-0.361012	NaN	NaN	NaN	NaN	NaN	-1.58965	-1.45817	0.525379	NaN	-1.34917	-0.789265	0.230434	NaN	-2.03511	-0.0893476	NaN	-1.18914	-0.937503	-0.372708	-1.06332	0.690615	0.0230997	0.0639136	S	3	___2	Casein kinase I substrate motif;Casein kinase II substrate motif;G protein-coupled receptor kinase 1 substrate motif;MDC1 BRCT domain binding motif;Plk1 PBD domain binding motif;Pyruvate dehydrogenase kinase substrate motif
-0.682835	-0.630915	-0.69188	-0.457303	0.0328865	-0.61494	-0.834281	0.0271483	-0.300805	-1.29339	-1.2644	-0.689207	-0.180898	-0.11784	-1.53696	-0.646127	-1.0734	-0.285272	NaN	-0.110752	-0.191113	-0.719462	-0.677395	-0.570644	-0.568036	-0.715583	-0.911145	-1.05393	-1.75145	-1.55507	-0.0171065	-0.645379	-1.17078	-0.327461	-0.565462	-0.818718	-2.10702	-1.39299	-1.08066	NaN	-1.11497	-0.630915	-1.0673	0.436384	0.115851	0.0161763	S	3	___3	Casein kinase II substrate motif;G protein-coupled receptor kinase 1 substrate motif;GSK3 kinase substrate motif
-0.682835	-0.630915	-0.69188	-0.457303	0.0328865	-0.61494	-0.834281	0.0271483	-0.300805	-1.29339	-1.2644	-0.689207	-0.180898	-0.11784	-1.53696	-0.646127	-1.0734	-0.285272	NaN	-0.110752	-0.191113	-0.719462	-0.677395	-0.570644	-0.568036	-0.715583	-0.911145	-1.05393	-1.75145	-1.55507	-0.0171065	-0.521412	-1.17078	-0.327461	-0.565462	-0.818718	-2.10702	-1.39299	-1.08066	NaN	-1.11497	-0.630915	-1.0673	0.436384	0.115851	0.0192936	S	3	___3	Casein kinase I substrate motif;Casein kinase II substrate motif;MAPKAPK2 kinase substrate motif;Pyruvate dehydrogenase kinase substrate motif
-0.682835	-0.630915	-0.69188	-0.457303	0.0328865	-0.61494	-0.834281	0.0271483	-0.300805	-1.29339	-1.2644	-0.689207	-0.180898	-0.11784	-1.53696	-0.646127	-1.0734	-0.285272	NaN	-0.110752	-0.191113	-0.719462	-0.677395	-0.570644	-0.568036	-0.715583	-0.911145	-1.05393	-1.75145	-1.55507	-0.0171065	-0.521412	-1.17078	-0.327461	-0.565462	-0.818718	-2.10702	-1.39299	-1.08066	NaN	-1.11497	-0.630915	-1.0673	0.436384	0.115851	0.0192936	S	3	___3	Casein kinase I substrate motif;Casein kinase II substrate motif;G protein-coupled receptor kinase 1 substrate motif;MDC1 BRCT domain binding motif;Plk1 PBD domain binding motif;Pyruvate dehydrogenase kinase substrate motif
-0.60154	-1.20319	-0.134053	-0.486912	-0.825463	-0.716665	-0.940379	-1.35732	-0.840542	0.0606991	-0.881416	-1.03696	NaN	-0.739312	-0.168414	-0.970189	-0.469847	-0.992838	-1.09228	NaN	-1.22028	-0.532526	-0.362071	-0.519892	NaN	-0.848287	NaN	-1.50217	-0.0790851	-0.445277	-0.694735	-0.224216	0.0687231	-0.385246	-1.32338	-0.512509	-0.276001	NaN	NaN	-0.278651	-0.528884	-0.825463	-0.415261	-0.410202	0.120449	0.175813	S	4	___1	BARD1 BRCT domain binding motif;Casein kinase I substrate motif;Casein kinase II substrate motif;G protein-coupled receptor kinase 1 substrate motif
-0.417301	NaN	NaN	0.273541	-0.35973	-0.354649	-1.08987	-0.971816	-0.616439	-0.153611	-0.160631	-0.556637	NaN	-0.465581	0.137817	-1.07468	-0.551777	-0.644538	NaN	0.0234039	-0.772354	-0.0822843	0.145101	NaN	NaN	0.186052	NaN	NaN	-0.637217	-0.100851	-0.616116	NaN	0.258677	-0.081183	-0.854225	NaN	NaN	0.0442604	-0.389198	NaN	-0.262978	-0.388515	-0.262978	-0.125537	0.324421	0.597463	S	3	___1	BARD1 BRCT domain binding motif;Casein kinase II substrate motif;MAPKAPK2 kinase substrate motif
NaN	NaN	NaN	0.0385218	-0.748436	NaN	NaN	-1.73964	NaN	NaN	-1.02524	-1.06093	NaN	NaN	NaN	NaN	-0.761886	-1.53119	NaN	-0.879286	-0.794666	NaN	-0.280246	NaN	-2.63869	NaN	-1.41237	NaN	NaN	NaN	NaN	-0.507088	NaN	-0.172382	NaN	-0.285911	-0.952826	-0.30699	NaN	NaN	NaN	-0.879286	-0.407039	-0.472247	0.0919074	0.163946	S	3	___2	Casein kinase II substrate motif;G protein-coupled receptor kinase 1 substrate motif;GSK3 kinase substrate motif;Phosphorylase kinase substrate motif;PKA kinase substrate motif;PKC kinase substrate motif
-1.46557	-2.15365	-0.663385	-1.29128	-0.689765	-1.28958	-1.24981	-0.84914	-0.899846	-0.702065	-1.38342	-1.86095	-1.21182	-1.26147	-0.774145	-1.51989	-1.27499	-1.37289	-0.591472	-1.15136	-2.18543	-0.688399	-1.10665	-1.10073	-2.91905	-1.65647	-0.881772	-1.99376	-0.727913	-1.24236	-1.70795	-0.676776	-0.146682	-1.55819	-2.28793	-1.58063	-0.730087	-0.458748	-1.21623	-1.27293	-0.981553	-1.25564	-1.21623	-0.0394092	0.405816	0.534084	S	3	___2	BARD1 BRCT domain binding motif;Casein kinase II substrate motif;MAPKAPK2 kinase substrate motif
-1.46557	-2.15365	-0.663385	-1.32687	-0.857106	-1.28958	-1.24981	-0.84914	-0.899846	-0.702065	-1.38342	-1.86095	-1.21182	-1.26147	-0.774145	-1.51989	-1.27499	-1.33602	-0.591472	-1.15136	-2.18543	-0.688399	-1.30191	-1.10073	-2.91905	-1.65647	-0.881772	-1.99376	-0.727913	-1.24236	-1.70795	-0.676776	-0.146682	-1.55819	-2.28793	-1.58063	-0.792904	-0.431779	-1.21623	-1.27293	-0.981553	-1.26823	-1.21623	-0.0519965	0.393564	0.492688	T	3	___2	Casein kinase II substrate motif;DNA dependent Protein kinase substrate motif
-0.310357	-0.956153	-0.242424	-1.35587	-0.902494	-0.6174	-0.656594	-1.11995	-1.01899	0.00674855	-0.933174	-0.955141	-1.29181	-1.06838	-0.700689	-0.959964	0.366473	-1.16029	NaN	-1.06578	-1.40459	-1.10385	-1.19236	-0.490822	-2.39917	-0.871977	NaN	-1.46534	-0.0108374	0.133013	-1.03885	-0.212542	0.568232	-0.14357	-1.34793	-0.760503	-0.130279	-0.0490208	-0.160254	-0.325827	-0.779437	-0.956153	-0.186398	-0.769755	0.018816	0.016158	S	3	___3	Casein kinase II substrate motif;G protein-coupled receptor kinase 1 substrate motif;GSK3 kinase substrate motif;Phosphorylase kinase substrate motif;PKA kinase substrate motif;PKC kinase substrate motif
-0.310357	-0.956153	-0.242424	-1.35587	-0.902494	-0.6174	-0.656594	-1.11995	-1.01899	0.00674855	-0.933174	-0.955141	-1.29181	-1.06838	-0.700689	-0.959964	0.366473	-1.16029	NaN	-1.06578	-1.40459	-1.10385	-1.19236	-0.490822	-2.39917	-0.871977	NaN	-1.46534	-0.0108374	0.133013	-1.03885	-0.212542	0.568232	-0.14357	-1.34793	-0.760503	-0.130279	-0.0490208	-0.160254	-0.325827	-0.779437	-0.956153	-0.186398	-0.769755	0.018816	0.016158	S	3	___3	BARD1 BRCT domain binding motif;Casein kinase II substrate motif;MAPKAPK2 kinase substrate motif
-0.310357	-0.956153	-0.242424	-1.35587	-0.902494	-0.6174	-0.656594	-1.11995	-1.01899	0.00674855	-0.933174	-0.955141	-1.29181	-1.06838	-0.700689	-0.959964	0.366473	-1.16029	NaN	-1.06578	-1.40459	-1.10385	-1.19236	-0.490822	-2.39917	-0.871977	NaN	-1.46534	-0.0108374	0.133013	-1.03885	-0.212542	0.568232	-0.14357	-1.34793	-0.760503	-0.130279	-0.0490208	-0.160254	-0.325827	-0.779437	-0.956153	-0.186398	-0.769755	0.018816	0.016158	T	3	___3	Casein kinase II substrate motif;DNA dependent Protein kinase substrate motif
NaN	-0.299338	NaN	2.15764	-0.905494	NaN	0.0871474	NaN	NaN	0.23156	-0.254116	NaN	NaN	NaN	0.358923	NaN	NaN	NaN	NaN	NaN	NaN	-0.235154	NaN	NaN	NaN	1.01422	NaN	NaN	NaN	NaN	0.872265	NaN	0.161063	0.173593	NaN	NaN	0.309922	0.899603	1.09129	NaN	NaN	0.0871474	0.591093	-0.503946	0.0794198	0.333784	S	2	___1	14-3-3 domain binding motif;ATM kinase substrate motif;Calmodulin-dependent protein kinase II substrate motif;Casein kinase II substrate motif;DNA dependent Protein kinase substrate motif;G protein-coupled receptor kinase 1 substrate motif;PKA kinase substrate motif;PKC kinase substrate motif
0.155042	0.234481	0.518579	2.58888	-0.920754	1.33419	0.548704	0.877849	-0.439393	0.869742	-0.451339	-0.899094	-0.591029	0.487962	0.984915	0.416276	0.434587	NaN	NaN	0.588818	NaN	NaN	-0.134629	NaN	NaN	NaN	NaN	0.225667	NaN	NaN	NaN	1.3399	0.769342	0.98475	-0.618352	-0.926729	0.710549	1.18385	1.5007	NaN	0.738312	0.434587	0.753827	-0.31924	0.172709	0.456207	S	2	___1	14-3-3 domain binding motif;Calmodulin-dependent protein kinase II substrate motif;Phosphorylase kinase substrate motif;PKA kinase substrate motif;PKC kinase substrate motif
NaN	NaN	NaN	0.995441	NaN	NaN	NaN	-0.197212	-0.691614	NaN	NaN	-0.375487	NaN	-0.891415	NaN	0.0493431	0.16102	NaN	NaN	NaN	NaN	-0.239779	NaN	NaN	NaN	NaN	NaN	NaN	NaN	NaN	NaN	0.595574	NaN	0.652911	-0.391149	NaN	NaN	0.96447	0.193022	NaN	0.923147	-0.218495	0.624243	-0.842738	0.0118251	0.050789	S	3	___1	DNA dependent Protein kinase substrate motif;ERK1,2 kinase substrate motif;G protein-coupled receptor kinase 1 substrate motif;GSK3 kinase substrate motif;GSK-3, ERK1, ERK2, CDK5 substrate motif;PKA kinase substrate motif;PKC kinase substrate motif;WW domain binding motif
-0.272992	-0.806772	NaN	-0.148822	NaN	NaN	NaN	NaN	-0.145848	-0.199865	-0.461303	-0.149277	NaN	1.63051	-0.497437	-1.12166	-0.402019	-1.08967	NaN	NaN	-0.374153	-0.803679	NaN	NaN	NaN	-0.339761	NaN	-1.54446	-1.06942	-1.03336	NaN	0.195845	NaN	NaN	-0.626687	NaN	-0.168762	0.0430648	NaN	NaN	-0.654081	-0.374153	-0.640384	0.266231	0.25393	0.345615	S	2	___1	14-3-3 domain binding motif;Calmodulin-dependent protein kinase II substrate motif;Casein kinase II substrate motif;ERK1,2 kinase substrate motif;Growth associated histone HI kinase substrate motif;GSK-3, ERK1, ERK2, CDK5 substrate motif;MAPKAPK1 kinase substrate motif;PKA kinase substrate motif;PKC kinase substrate motif;WW domain binding motif
2.56839	NaN	NaN	4.38997	NaN	NaN	NaN	4.16329	NaN	3.23362	NaN	2.90607	NaN	2.7617	NaN	NaN	1.84004	NaN	NaN	3.40098	NaN	NaN	2.89568	NaN	NaN	NaN	NaN	NaN	NaN	2.94722	2.27779	4.15696	NaN	NaN	1.48552	NaN	NaN	NaN	NaN	2.4888	2.79848	2.90607	2.64364	0.262426	0.257768	0.350615	S	3	___1	14-3-3 domain binding motif;Calmodulin-dependent protein kinase II substrate motif;Calmodulin-dependent protein kinase IV substrate motif;Casein kinase II substrate motif;Chk1 kinase substrate motif;MDC1 BRCT domain binding motif;PAK2 kinase substrate motif;Pim1 kinase substrate sequence;PKA kinase substrate motif;PKC epsilon kinase substrate motif;PKC kinase substrate motif;Plk1 PBD domain bindi…
NaN	-1.99702	-0.741149	NaN	NaN	NaN	-0.966625	-1.69935	NaN	-0.443157	NaN	NaN	NaN	NaN	-0.18595	NaN	NaN	NaN	NaN	NaN	NaN	NaN	NaN	NaN	NaN	-0.809617	-0.774427	NaN	NaN	NaN	NaN	NaN	NaN	NaN	-3.59659	-2.92179	0.0895898	NaN	-0.409286	0.141874	NaN	-0.809617	-0.591857	-0.21776	0.245797	0.715511	S	2	___1	14-3-3 domain binding motif;Calmodulin-dependent protein kinase II substrate motif;CLK1 kinase substrate motif;G protein-coupled receptor kinase 1 substrate motif;MAPKAPK2 kinase substrate motif;Phosphorylase kinase substrate motif;PKA kinase substrate motif;PKC kinase substrate motif
-2.75542	-2.99986	-1.18333	-2.74549	-3.27984	-3.52483	-2.8864	-2.50778	-2.93766	-2.18294	-3.74348	-2.66433	-4.32395	-2.64188	-2.6171	-3.44118	-2.21007	-2.5747	-3.02132	-2.32741	-2.75386	-4.29797	-3.84241	-2.94776	NaN	-2.81583	NaN	-4.1535	-3.66809	-3.92636	-3.2635	-2.05676	-1.22434	-2.30154	NaN	-3.33735	-3.28437	-3.00866	-3.15546	-2.61697	-3.00692	-2.81583	-3.15546	0.339625	0.186081	0.786486	S	2	___1	AMP-activated protein kinase substrate motif
NaN	-3.18313	NaN	NaN	NaN	-3.59083	NaN	-2.87408	-3.04363	-2.93171	-3.13773	NaN	NaN	NaN	-3.3517	-2.69573	-2.3789	NaN	NaN	NaN	NaN	-2.72031	-3.56681	NaN	NaN	-3.4153	NaN	-4.32053	-2.77707	-2.98657	-4.42266	-1.79494	-1.57907	-2.79713	NaN	NaN	-3.12578	-2.41011	-2.70876	-3.59715	NaN	-3.09068	-2.79713	-0.293555	0.189758	0.693299	S	4	___2	Casein kinase II substrate motif;G protein-coupled receptor kinase 1 substrate motif
-2.39182	-3.18313	NaN	-2.56465	-2.87241	-3.59083	NaN	-2.87408	-3.04363	-2.93171	-3.13773	NaN	NaN	NaN	-3.3517	-2.69573	-2.3789	-2.82925	NaN	NaN	NaN	-2.72031	-3.56681	NaN	NaN	-3.4153	NaN	-4.32053	-2.77707	-2.98657	-4.42266	-1.79494	-1.57907	-2.79713	-3.18451	NaN	-3.12578	-2.41011	-2.70876	-3.59715	NaN	-2.90289	-2.89185	-0.0110427	0.433749	0.989383	S	4	___2	Casein kinase II substrate motif;ERK1,2 kinase substrate motif;G protein-coupled receptor kinase 1 substrate motif;GSK-3, ERK1, ERK2, CDK5 substrate motif;MAPKAPK2 kinase substrate motif;WW domain binding motif
NaN	NaN	NaN	NaN	NaN	2.04831	2.80766	NaN	NaN	NaN	NaN	2.97641	NaN	NaN	NaN	2.65873	0.463743	NaN	2.97383	1.65682	NaN	NaN	NaN	1.83235	NaN	NaN	NaN	NaN	NaN	NaN	2.30694	NaN	NaN	1.0798	NaN	NaN	NaN	1.04772	0.406566	0.268998	NaN	2.35352	1.04772	1.3058	4.36302e-05	0.0368514	S	2	___1	b-Adrenergic Receptor kinase substrate motif;G protein-coupled receptor kinase 1 substrate motif;PKA kinase substrate motif;PKC kinase substrate motif
2.84998	NaN	NaN	NaN	NaN	4.05024	4.93815	0.932154	NaN	2.14314	NaN	NaN	NaN	NaN	3.36224	NaN	NaN	NaN	NaN	1.91743	NaN	NaN	NaN	NaN	NaN	NaN	NaN	NaN	NaN	NaN	NaN	NaN	NaN	2.00859	4.81923	NaN	1.45568	1.13635	2.61714	NaN	NaN	2.84998	2.00859	0.841392	0.00682038	0.581033	T	2	___1	Casein kinase I substrate motif
0.34773	NaN	-2.18133	NaN	-1.07896	-0.141246	NaN	NaN	-0.0158829	NaN	NaN	-3.1378	NaN	NaN	-2.4973	-0.393159	-1.51503	-0.139456	NaN	-2.46118	-1.90488	-0.00249854	NaN	NaN	NaN	NaN	NaN	-1.57237	0.635988	0.904618	-1.00517	NaN	-1.55266	-3.21057	0.130057	NaN	-1.07928	-1.55614	0.227661	-1.5971	NaN	-1.07896	-1.07928	0.000322461	0.445043	0.572421	S	3	___1	Casein kinase II substrate motif;G protein-coupled receptor kinase 1 substrate motif;PKA kinase substrate motif;PKC kinase substrate motif
NaN	NaN	NaN	NaN	NaN	-0.141246	NaN	NaN	NaN	NaN	NaN	NaN	NaN	NaN	-2.20376	NaN	-1.51503	-0.139456	NaN	NaN	-1.90488	0.946167	NaN	NaN	NaN	NaN	NaN	-1.57237	NaN	0.802348	-1.00517	NaN	-1.55266	-0.943553	NaN	NaN	NaN	-1.55614	0.227661	NaN	NaN	-0.828139	-1.00517	0.177029	0.351108	0.966891	S	3	___1	ATM kinase substrate motif;DNA dependent Protein kinase substrate motif
-0.414439	NaN	NaN	0.339013	0.200802	0.403679	NaN	0.00560443	0.683454	0.272068	0.335478	0.566512	NaN	0.400543	0.162645	-0.157844	0.315312	-0.0119498	NaN	0.270462	0.0698736	0.51589	0.527899	-0.245922	NaN	-0.0314853	NaN	0.563575	NaN	0.220405	0.756292	NaN	0.484304	0.312526	0.43611	0.707576	0.361145	0.39395	-0.165003	NaN	0.945027	0.271265	0.43611	-0.164845	0.289643	0.037348	S	3	___1	b-Adrenergic Receptor kinase substrate motif;Casein kinase II substrate motif;ERK1,2 kinase substrate motif;GSK-3, ERK1, ERK2, CDK5 substrate motif;PKA kinase substrate motif;PKC kinase substrate motif;WW domain binding motif
1.93476	2.24515	2.13907	1.43103	1.8663	2.68175	2.1392	2.206	0.258755	2.11788	2.04613	1.85508	3.00991	1.50806	1.61601	1.85176	1.73834	1.79626	3.18171	1.59216	2.12442	1.85388	1.99276	3.04524	NaN	2.10242	2.58898	2.31548	2.11996	1.73308	2.03083	2.06219	0.787888	1.34959	2.09935	2.30667	1.67783	1.26893	1.93564	1.58999	1.50366	1.99276	1.93564	0.0571222	0.497545	0.272765	S	2	___1	14-3-3 domain binding motif;Calmodulin-dependent protein kinase II substrate motif;Casein kinase II substrate motif;PAK2 kinase substrate motif;PKA kinase substrate motif;PKC epsilon kinase substrate motif;PKC kinase substrate motif
2.10302	2.22187	3.00773	1.21468	0.655069	2.47515	0.568792	2.83075	-0.440078	2.38421	0.367401	2.51542	0.146215	1.63433	1.43058	1.56922	1.33453	0.532571	0.04129	1.06188	1.7106	-0.567809	1.71384	2.81449	NaN	1.51657	2.43653	1.53841	0.974093	1.39369	2.65321	2.69623	0.752798	1.52333	1.49172	0.142985	1.61259	0.833631	2.07563	1.58174	0.7521	1.51657	1.52333	-0.00676405	0.437995	0.714405	S	2	___1	14-3-3 domain binding motif;Calmodulin-dependent protein kinase II alpha substrate motif;Calmodulin-dependent protein kinase II substrate motif;Calmodulin-dependent protein kinase IV substrate motif;Casein kinase II substrate motif;G protein-coupled receptor kinase 1 substrate motif;Phosphorylase kinase substrate motif;Pim1 kinase substrate sequence;PKA kinase substrate motif;PKC epsilon kinase s…
2.31955	2.38713	2.69492	NaN	NaN	2.71925	NaN	2.53293	NaN	2.2862	NaN	2.41999	NaN	1.70671	NaN	2.13187	NaN	NaN	NaN	NaN	NaN	NaN	2.28713	NaN	NaN	NaN	NaN	1.43841	1.56961	1.79061	3.2837	2.88382	NaN	1.66356	NaN	NaN	NaN	NaN	NaN	NaN	NaN	2.35334	1.72708	0.626251	0.0365953	0.489441	S	2	___1	Casein kinase II substrate motif;DNA dependent Protein kinase substrate motif;G protein-coupled receptor kinase 1 substrate motif;Phosphorylase kinase substrate motif;PKA kinase substrate motif;PKC kinase substrate motif
-0.852606	-0.524409	NaN	NaN	0.506929	NaN	0.783253	-0.333203	1.59265	NaN	NaN	NaN	-0.0520284	NaN	NaN	NaN	NaN	NaN	NaN	NaN	NaN	NaN	NaN	NaN	NaN	NaN	-0.821367	NaN	-0.229086	NaN	NaN	-0.526381	NaN	NaN	-0.241842	0.224669	NaN	NaN	-0.00976953	NaN	1.66575	-0.0520284	-0.229086	0.177057	0.351076	0.738563	S	2	___1	Casein kinase II substrate motif;PKA kinase substrate motif;PKC kinase substrate motif
-1.08637	-0.416406	0.0180696	-0.673336	0.70407	0.102201	0.535482	-0.517746	1.42959	-0.112851	0.307441	0.340552	0.273249	-0.0857112	0.0180152	-0.455529	-0.252173	-0.641202	-0.189047	-0.535757	-0.0543026	0.0970641	-0.0726512	-0.526167	NaN	-0.264413	NaN	NaN	-0.370413	NaN	0.155092	NaN	0.742829	0.0790686	0.0483501	NaN	-0.401514	0.909249	-0.130581	0.267637	1.50977	-0.0857112	0.117081	-0.202792	0.257828	0.115956	S	2	___1	ERK1,2 kinase substrate motif;G protein-coupled receptor kinase 1 substrate motif;GSK3 kinase substrate motif;GSK-3, ERK1, ERK2, CDK5 substrate motif;PKA kinase substrate motif;PKC kinase substrate motif;WW domain binding motif
0.101736	-0.549553	-0.779353	-0.462826	0.256888	-0.303979	-0.269185	-0.523449	-0.365809	-0.268256	-0.169922	-0.0235187	1.44774	-0.177649	-0.603928	-0.475431	-0.253074	-0.401216	0.323805	-0.495995	-0.403096	-0.288011	0.0603365	-0.41333	-0.335722	0.591093	-0.434268	-0.361286	-0.521929	-0.583822	-0.428001	-0.742749	0.0229779	-0.0778193	-0.337204	0.0131689	-0.326867	-0.434057	-0.814855	-0.370148	-0.177055	-0.295995	-0.370148	0.0741528	0.476244	0.0942762	S	3	___1	b-Adrenergic Receptor kinase substrate motif;BARD1 BRCT domain binding motif;Casein kinase II substrate motif;PKA kinase substrate motif;PKC kinase substrate motif
-0.0919285	-0.142302	-0.0675561	-0.184266	0.0778485	0.342031	0.250155	-0.248708	-0.00118754	-0.0956239	-0.0212014	0.195286	0.700664	0.0583966	NaN	-0.0182205	-0.371556	-1.81933	0.617675	-0.0558398	0.135364	0.159575	-0.0486668	0.407413	0.400906	-0.0757549	0.3345	-0.00460376	-0.0968131	-0.26828	-0.145846	-0.322695	0.16889	0.0794926	-0.170407	0.0940255	-0.175054	0.0857741	-0.280279	0.0928812	-0.107621	-0.0182205	-0.0968131	0.0785927	0.470699	0.620884	S	2	___1	Casein kinase I substrate motif;Cdc2 kinase substrate motif;CDK kinase substrate motif;CDK1,2,4,6 kinase substrate motif;ERK1,2 kinase substrate motif;Growth associated histone HI kinase substrate motif;GSK-3, ERK1, ERK2, CDK5 substrate motif;PKA kinase substrate motif;PKC kinase substrate motif;WW domain binding motif
0.424549	0.548027	0.488742	0.506556	0.621419	0.889671	0.652906	0.297274	0.632953	0.319945	0.526239	0.628752	0.940891	0.387835	0.210189	0.420586	0.154558	0.598033	0.480062	0.424045	0.496799	0.769301	0.643518	0.848303	0.729142	0.392681	0.589853	0.65267	0.299551	0.308887	0.0745709	0.266547	0.48666	0.409829	0.360684	0.672436	0.320878	0.443893	0.159563	0.416286	0.504038	0.516397	0.409829	0.106568	0.435937	0.0207571	S	2	___1	14-3-3 domain binding motif;ATM kinase substrate motif;Calmodulin-dependent protein kinase II substrate motif;Casein kinase II substrate motif;DNA dependent Protein kinase substrate motif;G protein-coupled receptor kinase 1 substrate motif;GSK3 kinase substrate motif;PAK2 kinase substrate motif;PKA kinase substrate motif;PKC epsilon kinase substrate motif;PKC kinase substrate motif
0.480154	NaN	NaN	-0.801693	-0.903403	0.0877081	-0.285114	-0.359139	-1.10015	-1.64956	-0.20365	-1.81146	-0.882246	-1.32156	-0.562535	0.349785	NaN	NaN	-0.172167	NaN	-1.06917	0.0772504	-1.3492	1.25016	NaN	-2.40041	NaN	-1.55013	NaN	NaN	-0.822045	-1.7932	-1.35071	NaN	0.504868	NaN	-0.578771	NaN	0.197383	NaN	-1.97224	-0.682114	-1.08638	0.404264	0.136711	0.458088	S	3	___1	14-3-3 domain binding motif;Akt kinase substrate motif;Calmodulin-dependent protein kinase II substrate motif;Casein kinase II substrate motif;G protein-coupled receptor kinase 1 substrate motif;MAPKAPK1 kinase substrate motif;PKA kinase substrate motif;PKC kinase substrate motif
-0.422361	-0.207357	0.12495	-0.274705	-0.227157	0.1626	0.128821	-0.110674	0.307921	-0.653572	-0.0216883	0.169249	0.678235	0.613542	-0.436284	0.00557438	-0.261407	0.262944	0.111126	-0.105726	0.388992	0.123799	-0.00680259	0.113436	NaN	-0.0075647	0.130203	0.155611	-0.184326	-0.229663	0.239069	-0.577452	-0.172787	-0.0906528	0.189566	0.218484	-0.300117	-0.323995	-0.503061	-0.124612	0.103045	0.00557438	-0.124612	0.130186	0.40696	0.215991	S	2	___1	Cdc2 kinase substrate motif;CDK kinase substrate motif;CDK1,2,4,6 kinase substrate motif;DNA dependent Protein kinase substrate motif;ERK1,2 kinase substrate motif;GSK-3, ERK1, ERK2, CDK5 substrate motif;WW domain binding motif
0.369026	1.22137	0.737726	NaN	0.940598	0.448004	0.808872	NaN	0.794019	0.533094	0.587192	0.861042	NaN	0.861486	0.518319	-0.52241	0.0735639	1.2432	1.01703	1.08206	0.559793	1.01091	NaN	0.705539	NaN	NaN	0.878822	NaN	NaN	0.369719	0.602914	NaN	-0.0556616	0.672702	0.730447	NaN	NaN	0.374967	0.194483	NaN	0.684492	0.765873	0.602914	0.162959	0.367611	0.157487	S	2	___1	Casein kinase II substrate motif;ERK1,2 kinase substrate motif;GSK-3, ERK1, ERK2, CDK5 substrate motif;PKA kinase substrate motif;PKC kinase substrate motif;WW domain binding motif
-0.517906	NaN	NaN	NaN	NaN	NaN	NaN	NaN	-0.357402	NaN	-0.528105	-0.456729	NaN	NaN	-0.303755	NaN	NaN	NaN	NaN	NaN	NaN	-0.114244	NaN	NaN	NaN	NaN	NaN	-0.228923	NaN	-0.386912	NaN	NaN	-0.733131	0.514715	NaN	NaN	-0.277915	NaN	NaN	NaN	NaN	-0.407065	-0.277915	-0.12915	0.321154	0.497005	S	3	___1	BARD1 BRCT domain binding motif;Casein kinase II substrate motif;G protein-coupled receptor kinase 1 substrate motif;PKA kinase substrate motif;PKC kinase substrate motif
2.25536	NaN	NaN	NaN	1.11652	2.43193	NaN	2.98206	NaN	NaN	0.739508	2.15066	NaN	2.47586	NaN	2.14568	1.53578	1.13224	NaN	1.25	2.61387	-0.523645	NaN	NaN	NaN	NaN	NaN	1.67116	1.1434	1.35727	3.07602	NaN	NaN	1.8803	1.7752	0.45224	1.67789	1.03366	2.42215	1.74554	1.07311	2.14568	1.67452	0.471162	0.0959306	0.750735	S	2	___1	14-3-3 domain binding motif;Calmodulin-dependent protein kinase II alpha substrate motif;Calmodulin-dependent protein kinase II substrate motif;Calmodulin-dependent protein kinase IV substrate motif;Casein kinase II substrate motif;G protein-coupled receptor kinase 1 substrate motif;Phosphorylase kinase substrate motif;Pim1 kinase substrate sequence;PKA kinase substrate motif;PKC epsilon kinase s…
0.904905	-0.553033	-1.86881	NaN	-1.25143	-0.258755	2.20877	NaN	-0.793649	-3.13404	-1.95199	-2.5982	NaN	-1.78765	-2.48007	-0.561174	-1.60115	-0.874021	-1.19254	-2.22962	-1.94584	-0.309929	NaN	0.972159	-1.45936	-2.35519	NaN	-1.49986	0.220038	0.733242	-1.65233	NaN	-2.07036	-2.97101	0.425377	-1.84689	-1.16865	-1.87552	-0.458674	-1.34946	-1.63872	-1.35539	-1.49986	0.144463	0.389677	0.954122	S	3	___2	Casein kinase II substrate motif;G protein-coupled receptor kinase 1 substrate motif;PKA kinase substrate motif;PKC kinase substrate motif
0.904905	-0.553033	-1.86881	NaN	-1.25143	-0.258755	2.20877	NaN	-0.793649	-3.13404	-1.95199	-2.5982	NaN	-1.78765	-2.48007	-0.561174	-1.60115	-0.874021	-1.19254	-2.22962	-1.94584	-0.309929	NaN	0.972159	-1.45936	-2.35519	NaN	-1.49986	0.220038	0.733242	-1.65233	NaN	-2.07036	-2.97101	0.425377	-1.84689	-1.16865	-1.87552	-0.458674	-1.34946	-1.63872	-1.35539	-1.49986	0.144463	0.389677	0.954122	S	3	___2	ATM kinase substrate motif;DNA dependent Protein kinase substrate motif
NaN	NaN	NaN	NaN	NaN	0.577392	0.788423	-1.02101	-0.122257	0.529331	-0.591398	NaN	1.97754	NaN	NaN	NaN	NaN	0.82402	1.615	-0.29876	NaN	NaN	0.439953	-0.60701	NaN	NaN	NaN	NaN	NaN	0.422251	1.04989	NaN	1.01398	-0.985551	-0.170977	NaN	NaN	0.0914293	NaN	NaN	-0.309995	0.484642	0.0914293	0.393213	0.144448	0.63717	S	3	___2	b-Adrenergic Receptor kinase substrate motif;Casein kinase II substrate motif;ERK1,2 kinase substrate motif;GSK-3, ERK1, ERK2, CDK5 substrate motif;PKA kinase substrate motif;PKC kinase substrate motif;WW domain binding motif
-0.498304	-0.0250868	NaN	0.0291518	0.374057	0.277359	0.367646	-0.110416	0.00330819	NaN	0.406657	0.0746915	NaN	0.457114	-0.0582983	-0.334957	0.00490237	0.49326	NaN	0.105824	0.122288	0.481855	0.351674	0.382069	NaN	0.69606	NaN	0.832312	-0.0332514	-0.262253	0.122446	NaN	-0.081826	-0.00670922	-0.0122353	0.50169	-0.111547	-0.409623	-0.14484	NaN	-0.236849	0.122288	-0.0575387	0.179826	0.34786	0.194713	S	3	___2	BARD1 BRCT domain binding motif;Casein kinase II substrate motif;G protein-coupled receptor kinase 1 substrate motif
-2.63495	NaN	NaN	-0.720291	1.09417	0.896004	0.788423	-0.836242	0.248481	0.529331	-0.25495	-0.124033	1.97754	-2.52036	-0.805784	-6.26878	0.203175	0.65535	1.615	-0.118703	NaN	-0.0623653	0.67669	-0.530602	NaN	NaN	NaN	1.10458	-0.104146	0.424507	0.853573	NaN	0.561416	-0.420576	-0.170977	NaN	0.281921	0.458905	NaN	NaN	-0.11538	-0.0623653	0.353214	-0.415579	0.117753	0.17575	S	3	___2	Casein kinase II substrate motif;ERK1,2 kinase substrate motif;G protein-coupled receptor kinase 1 substrate motif;GSK3 kinase substrate motif;GSK-3, ERK1, ERK2, CDK5 substrate motif;WW domain binding motif
-2.63495	NaN	NaN	NaN	NaN	1.21458	NaN	NaN	0.647081	NaN	0.082985	NaN	NaN	NaN	-0.805784	NaN	0.203175	0.65311	NaN	0.0503281	NaN	0.0916075	0.913447	NaN	NaN	NaN	NaN	1.10458	NaN	0.42675	0.853573	NaN	0.561416	0.129129	NaN	NaN	0.281921	0.76251	NaN	NaN	0.0728363	0.147391	0.494083	-0.346692	0.155603	0.217317	S	3	___2	Casein kinase II substrate motif;ERK1,2 kinase substrate motif;G protein-coupled receptor kinase 1 substrate motif;GSK-3, ERK1, ERK2, CDK5 substrate motif;MAPKAPK2 kinase substrate motif;MDC1 BRCT domain binding motif;Plk1 PBD domain binding motif;Pyruvate dehydrogenase kinase substrate motif;WW domain binding motif
-0.910946	NaN	NaN	-0.872022	1.40763	NaN	0.760695	NaN	1.40753	NaN	NaN	0.384609	-0.0742749	0.349878	-0.93232	-0.276673	NaN	-0.688704	NaN	-0.600743	0.0764797	0.204935	-0.247648	-0.482654	-0.603818	NaN	NaN	-0.305149	NaN	-0.204297	0.208934	-0.337608	0.323152	-0.0549572	NaN	0.140926	NaN	0.535093	-0.115197	NaN	1.60511	-0.247648	0.0429843	-0.290632	0.191762	0.349888	S	2	___2	Casein kinase II substrate motif;PKA kinase substrate motif;PKC kinase substrate motif
-0.910946	NaN	NaN	-0.872022	1.40763	NaN	0.760695	NaN	1.40753	NaN	NaN	0.384609	-0.0742749	0.349878	-0.93232	-0.276673	NaN	-0.688704	NaN	-0.600743	0.0764797	0.204935	-0.247648	-0.482654	-0.603818	NaN	NaN	-0.305149	NaN	-0.204297	0.208934	-0.337608	0.323152	-0.0549572	NaN	0.140926	NaN	0.535093	-0.115197	NaN	1.60511	-0.247648	0.0429843	-0.290632	0.191762	0.349888	S	2	___2	ERK1,2 kinase substrate motif;G protein-coupled receptor kinase 1 substrate motif;GSK3 kinase substrate motif;GSK-3, ERK1, ERK2, CDK5 substrate motif;PKA kinase substrate motif;PKC kinase substrate motif;WW domain binding motif
0.516853	0.281293	0.953575	1.05182	0.92261	0.55076	1.23582	0.0504224	-0.0257946	1.07778	0.316297	-0.364942	0.0363132	1.16452	0.683351	0.653718	0.764362	NaN	1.30732	0.738068	-0.0231633	1.34842	1.0982	2.28511	1.14555	0.924226	2.53986	1.54792	NaN	0.541504	0.724709	-0.396982	NaN	0.506546	0.669183	1.8937	0.290574	0.152948	0.827393	1.03825	1.12697	0.764362	0.724709	0.0396533	0.484414	0.587745	S	3	___2	Casein kinase II substrate motif;MDC1 BRCT domain binding motif;Phosphorylase kinase substrate motif;PKA kinase substrate motif;PKC kinase substrate motif;Plk1 PBD domain binding motif
-0.71541	-0.978625	-1.45315	NaN	NaN	-1.05299	-0.638058	-0.18295	NaN	NaN	-1.00732	-0.781614	-0.409322	-0.440967	-1.10452	-0.995866	NaN	NaN	0.534256	-0.478368	-0.586014	-0.730142	NaN	NaN	-0.625409	NaN	NaN	NaN	NaN	NaN	-0.460348	NaN	-0.599203	0.593833	-1.1022	-0.699526	-0.595221	-0.97296	-1.41861	-1.55792	-0.617444	-0.71541	-0.658485	-0.0569244	0.388795	0.794041	S	3	___2	Casein kinase II substrate motif;G protein-coupled receptor kinase 1 substrate motif;MAPKAPK2 kinase substrate motif
0.383723	0.281293	0.0278015	1.05182	0.92261	0.742149	1.17695	0.0504224	1.43133	1.07778	0.316297	-0.545081	0.0363132	0.523709	-0.0455238	0.60533	0.764362	NaN	0.920799	0.123497	-0.320639	1.97284	1.54798	2.28511	0.934264	0.924226	2.53986	1.54792	NaN	0.580078	0.724709	-0.396982	0.665137	0.588344	0.669183	1.14579	0.29866	0.152948	0.141969	0.363842	0.308079	0.742149	0.584211	0.157938	0.373561	0.928689	S	3	___2	b-Adrenergic Receptor kinase substrate motif;BARD1 BRCT domain binding motif;Casein kinase II substrate motif;PKA kinase substrate motif;PKC kinase substrate motif
0.0981196	0.302563	0.309014	0.255067	0.181777	0.490197	0.414218	-0.222047	0.353827	0.0107452	0.23244	0.451748	0.546353	0.336498	0.113244	0.155453	0.115117	0.391736	NaN	0.271742	0.415975	0.285963	0.201859	NaN	0.280207	0.0726121	0.27302	-1.41436	0.24321	0.0194958	0.486939	-0.0245309	0.122579	0.162465	0.237504	NaN	0.234841	0.285274	0.00511619	0.341024	0.184008	0.275975	0.209425	0.0665502	0.485748	0.196437	S	3	___2	Akt kinase substrate motif;Casein kinase II substrate motif;ERK1,2 kinase substrate motif;G protein-coupled receptor kinase 1 substrate motif;Growth associated histone HI kinase substrate motif;GSK-3, ERK1, ERK2, CDK5 substrate motif;PKA kinase substrate motif;PKC kinase substrate motif;WW domain binding motif
0.0981196	0.302563	0.309014	0.255067	0.181777	0.490197	0.414218	-0.222047	0.353827	0.0107452	0.23244	0.451748	0.546353	0.336498	0.113244	0.155453	0.115117	0.391736	NaN	0.271742	0.415975	0.285963	0.201859	NaN	0.391074	0.0726121	0.27302	-1.41436	0.24321	0.0194958	0.486939	-0.0245309	0.122579	0.162465	0.237504	NaN	0.234841	0.285274	0.00511619	0.341024	0.184008	0.278852	0.209425	0.069428	0.482149	0.185559	S	3	___2	Akt kinase substrate motif;Cdc2 kinase substrate motif;CDK kinase substrate motif;CDK1,2,4,6 kinase substrate motif;DNA dependent Protein kinase substrate motif;ERK1,2 kinase substrate motif;GSK-3, ERK1, ERK2, CDK5 substrate motif;MAPKAPK2 kinase substrate motif;PKA kinase substrate motif;PKC kinase substrate motif;WW domain binding motif
-0.498304	-0.0250868	NaN	0.0291518	0.374057	0.277359	0.367646	-0.110416	0.00330819	NaN	0.406657	0.0746915	NaN	0.457114	-0.0582983	-0.334957	0.00490237	0.49326	NaN	0.105824	0.122288	0.481855	0.351674	0.382069	NaN	0.69606	NaN	0.832312	-0.0332514	-0.262253	0.122446	NaN	-0.081826	-0.00670922	-0.0122353	0.50169	-0.111547	-0.409623	-0.14484	NaN	-0.236849	0.122288	-0.0575387	0.179826	0.34786	0.194713	T	3	___2	b-Adrenergic Receptor kinase substrate motif;Casein kinase I substrate motif;GSK-3, ERK1, ERK2, CDK5 substrate motif;MAPKAPK2 kinase substrate motif;WW domain binding motif
NaN	NaN	NaN	NaN	NaN	NaN	2.69218	0.0429325	NaN	NaN	NaN	0.262843	2.60752	NaN	NaN	NaN	1.62544	NaN	NaN	NaN	NaN	NaN	NaN	NaN	NaN	NaN	NaN	NaN	0.629771	0.990472	1.93784	0.0867562	1.04921	NaN	NaN	NaN	NaN	NaN	NaN	NaN	NaN	1.62544	0.990472	0.634963	0.0344578	0.455971	S	3	___3	b-Adrenergic Receptor kinase substrate motif;Casein kinase II substrate motif;ERK1,2 kinase substrate motif;GSK-3, ERK1, ERK2, CDK5 substrate motif;PKA kinase substrate motif;PKC kinase substrate motif;WW domain binding motif
NaN	NaN	NaN	NaN	NaN	NaN	2.69218	0.0429325	NaN	NaN	NaN	0.262843	2.60752	NaN	NaN	NaN	1.62544	NaN	NaN	NaN	NaN	NaN	NaN	NaN	NaN	NaN	NaN	NaN	0.629771	0.990472	1.93784	0.0867562	1.04921	NaN	NaN	NaN	NaN	NaN	NaN	NaN	NaN	1.62544	0.990472	0.634963	0.0344578	0.455971	S	3	___3	Casein kinase II substrate motif;ERK1,2 kinase substrate motif;G protein-coupled receptor kinase 1 substrate motif;GSK3 kinase substrate motif;GSK-3, ERK1, ERK2, CDK5 substrate motif;WW domain binding motif
0.357604	0.928214	1.04139	0.209555	-0.26923	NaN	0.203404	NaN	1.67862	NaN	NaN	0.691375	NaN	0.314761	NaN	0.612153	0.415829	0.679145	NaN	0.728981	-0.156694	0.57046	0.653793	0.392967	NaN	1.5003	NaN	1.1604	0.399249	0.165686	0.165791	NaN	-0.525573	NaN	-0.153641	NaN	NaN	0.024549	0.444379	0.751297	NaN	0.591306	0.165791	0.425515	0.122641	0.137651	S	3	___1	Casein kinase II substrate motif;DNA dependent Protein kinase substrate motif;ERK1,2 kinase substrate motif;Growth associated histone HI kinase substrate motif;GSK-3, ERK1, ERK2, CDK5 substrate motif;PKA kinase substrate motif;PKC kinase substrate motif;WW domain binding motif
0.0660029	0.086002	0.321642	-0.122587	-1.27838	-0.144792	-0.743913	0.159354	0.0164168	-0.0924357	-0.297956	-0.444593	-0.462225	-1.30119	0.334921	0.0318233	0.139749	-0.526646	-0.656663	-0.241167	-0.834074	-0.138023	-0.902118	-0.24538	NaN	0.508497	-0.453721	0.173109	0.10395	0.4924	-0.998495	0.0181307	0.117895	0.0710236	-0.886003	-0.712805	0.318186	0.21361	0.217697	0.28468	-0.00160626	-0.144792	0.10395	-0.248742	0.221881	0.198409	S	2	___1	14-3-3 domain binding motif;Calmodulin-dependent protein kinase II substrate motif;Casein kinase II substrate motif;G protein-coupled receptor kinase 1 substrate motif;GSK3 kinase substrate motif;MAPKAPK2 kinase substrate motif;PKA kinase substrate motif;PKC kinase substrate motif
NaN	NaN	NaN	NaN	2.1358	1.07802	NaN	0.635077	0.883133	0.322344	0.448967	-0.0436499	NaN	0.784522	0.651395	0.0311705	0.911083	NaN	NaN	-0.400425	0.41925	1.93508	1.40521	NaN	NaN	0.467451	NaN	0.79061	0.383932	0.808131	1.37338	1.32315	0.888156	0.544817	1.0651	NaN	0.347147	0.493974	0.455303	0.506181	NaN	0.643236	0.667714	-0.0244776	0.420469	0.923078	S	3	___1	14-3-3 domain binding motif;Calmodulin-dependent protein kinase II substrate motif;G protein-coupled receptor kinase 1 substrate motif;GSK3 kinase substrate motif;PKA kinase substrate motif;PKC epsilon kinase substrate motif;PKC kinase substrate motif
0.515658	-0.159505	-0.703092	NaN	-1.32251	0.721698	-0.369334	0.560967	-0.0283231	0.704494	-0.182513	-0.0314354	NaN	-1.35677	0.58456	0.291816	1.29554	-1.20983	NaN	0.234992	-0.199703	-0.115061	-0.574394	0.0730387	NaN	0.424414	NaN	-0.724789	-0.147086	0.728403	-0.542293	0.0540188	1.03015	1.57974	NaN	NaN	0.77596	1.1409	0.456455	0.887625	0.0837594	-0.0298793	0.592429	-0.622308	0.0438864	0.068135	S	2	___1	14-3-3 domain binding motif;Akt kinase substrate motif;Calmodulin-dependent protein kinase II substrate motif;ERK1,2 kinase substrate motif;GSK-3, ERK1, ERK2, CDK5 substrate motif;MAPKAPK1 kinase substrate motif;PKA kinase substrate motif;PKC kinase substrate motif;WW domain binding motif
NaN	-0.0918411	-0.148886	-0.182317	0.330211	NaN	-0.0718946	NaN	0.238881	NaN	0.193571	0.311639	0.111535	0.758311	NaN	0.0013934	NaN	0.388881	NaN	-0.03138	-0.00524687	0.961679	-0.0169538	NaN	NaN	-0.331371	NaN	0.283584	-0.41953	-1.08168	NaN	-0.279986	-0.567224	-0.347759	0.319667	0.202947	NaN	-0.287326	-0.202939	-0.63403	1.41177	0.0013934	-0.283656	0.28505	0.235389	0.187393	S	2	___1	14-3-3 domain binding motif;Calmodulin-dependent protein kinase II substrate motif;ERK1,2 kinase substrate motif;GSK-3, ERK1, ERK2, CDK5 substrate motif;PKA kinase substrate motif;PKC epsilon kinase substrate motif;PKC kinase substrate motif;WW domain binding motif
-0.641152	-0.825083	NaN	NaN	NaN	NaN	-1.18921	NaN	0.150193	0.91603	NaN	NaN	NaN	NaN	-2.03747	NaN	NaN	NaN	-0.13233	0.00862606	-2.01489	NaN	NaN	0.228677	NaN	NaN	0.244256	0.68481	NaN	-1.1155	NaN	NaN	1.9248	NaN	NaN	-1.36886	-1.5331	NaN	NaN	0.819753	2.04517	-0.386741	0.464533	-0.851274	0.0111777	0.218973	S	2	___1	14-3-3 domain binding motif;Calmodulin-dependent protein kinase II substrate motif;Calmodulin-dependent protein kinase IV substrate motif;Casein kinase II substrate motif;Chk1 kinase substrate motif;PKA kinase substrate motif;PKC kinase substrate motif
NaN	NaN	-0.0586812	NaN	NaN	-0.30703	NaN	-0.423138	NaN	NaN	-0.0202435	NaN	NaN	NaN	0.0302373	NaN	-0.662623	NaN	NaN	-0.242187	0.254328	NaN	0.145407	NaN	NaN	-0.102578	NaN	NaN	-0.481714	NaN	-0.0161509	-0.483815	NaN	0.120541	-0.123993	NaN	-0.222834	-0.413412	-0.381755	NaN	-0.287467	-0.0806297	-0.287467	0.206837	0.317092	0.316477	S	3	___1	Casein kinase II substrate motif;ERK1,2 kinase substrate motif;G protein-coupled receptor kinase 1 substrate motif;GSK-3, ERK1, ERK2, CDK5 substrate motif;WW domain binding motif
-0.284226	-0.206809	NaN	3.32105	NaN	0.497355	2.49274	1.09565	0.150779	1.1295	2.21494	NaN	NaN	-0.527974	NaN	-1.33562	0.650927	NaN	NaN	NaN	-0.34078	2.21381	NaN	0.739655	NaN	NaN	NaN	NaN	1.79712	1.72268	0.0281553	1.43883	1.02158	1.36917	NaN	NaN	NaN	0.717502	1.44278	NaN	1.5448	0.650927	1.43883	-0.787908	0.0168105	0.262027	T	3	___1	PKA kinase substrate motif;PKC kinase substrate motif
-1.01726	NaN	-0.439616	-0.620907	NaN	-0.764403	0.339166	-1.28837	0.133542	-0.584845	0.433383	-1.23087	NaN	-1.18741	-0.0622012	-0.489879	-0.228023	0.236758	-1.02978	-0.983419	-0.602137	0.587579	-0.225523	NaN	NaN	NaN	NaN	-0.312997	0.0523215	0.502016	-1.0459	NaN	-0.202712	0.423247	-1.16804	-2.23586	-0.850454	0.403822	-0.00109233	1.03317	0.249116	-0.537362	-0.00109233	-0.53627	0.068054	0.460302	S	2	___1	Casein kinase II substrate motif;Pyruvate dehydrogenase kinase substrate motif
NaN	NaN	NaN	NaN	NaN	NaN	-0.454287	NaN	NaN	-0.244341	0.739182	NaN	NaN	NaN	NaN	NaN	0.21949	NaN	NaN	NaN	NaN	1.14485	0.846168	NaN	NaN	NaN	NaN	NaN	1.41606	0.807772	NaN	NaN	NaN	NaN	NaN	0.750759	NaN	NaN	0.686271	1.31983	NaN	0.479336	0.807772	-0.328436	0.16685	0.0749894	S	3	___2	14-3-3 domain binding motif;Calmodulin-dependent protein kinase II substrate motif;Calmodulin-dependent protein kinase IV substrate motif;Casein kinase II substrate motif;Chk1 kinase substrate motif;ERK1,2 kinase substrate motif;G protein-coupled receptor kinase 1 substrate motif;GSK-3, ERK1, ERK2, CDK5 substrate motif;PKA kinase substrate motif;PKC kinase substrate motif;WW domain binding motif
NaN	NaN	NaN	NaN	NaN	NaN	-0.454287	NaN	NaN	-0.244341	0.739182	NaN	NaN	NaN	NaN	NaN	0.21949	NaN	NaN	NaN	NaN	1.14485	0.846168	NaN	NaN	NaN	NaN	NaN	1.41606	0.807772	NaN	NaN	NaN	NaN	NaN	0.750759	NaN	NaN	0.686271	1.31983	NaN	0.479336	0.807772	-0.328436	0.16685	0.0749894	T	3	___2	Cdc2 kinase substrate motif;CDK1,2,4,6 kinase substrate motif;ERK1,2 kinase substrate motif;GSK3, Erk1, Erk2 and CDK5 kinase motif;GSK-3, ERK1, ERK2, CDK5 substrate motif;WW domain binding motif
NaN	NaN	-0.401874	1.48768	NaN	2.68275	NaN	NaN	1.27577	1.74786	3.0825	2.10573	NaN	NaN	2.45723	0.321743	NaN	NaN	NaN	2.0458	0.922327	3.0266	3.1918	4.24825	NaN	NaN	NaN	NaN	1.82166	1.20167	0.891079	0.0670823	1.72361	2.49823	NaN	NaN	1.91331	NaN	2.53934	NaN	1.52871	2.07576	1.72361	0.352152	0.175738	0.31035	S	2	___1	Casein kinase II substrate motif;G protein-coupled receptor kinase 1 substrate motif;PKA kinase substrate motif;PKC kinase substrate motif
1.57251	NaN	NaN	NaN	3.91549	NaN	NaN	NaN	NaN	NaN	NaN	NaN	NaN	NaN	2.44713	NaN	0.95665	3.00875	NaN	2.11146	NaN	NaN	NaN	NaN	NaN	1.45384	NaN	NaN	1.97865	NaN	2.28872	1.88614	2.2133	1.27338	0.862749	NaN	NaN	NaN	NaN	1.75565	1.82694	2.11146	1.85654	0.254916	0.265435	0.313923	S	4	___1	PKA kinase substrate motif;PKC kinase substrate motif
0.692867	NaN	NaN	1.24283	-0.276829	1.08135	NaN	0.115865	0.555992	0.577053	1.36248	1.2058	2.46638	0.0754228	0.885588	0.550358	0.521559	1.25716	3.52819	0.760658	0.24419	1.09061	NaN	3.15565	NaN	-0.0988615	NaN	1.17779	0.61305	0.450901	0.266466	0.456712	1.34449	0.848426	NaN	NaN	0.6775	0.672725	0.983768	NaN	0.381698	0.760658	0.672725	0.0879325	0.459056	0.244729	S	2	___1	ERK1,2 kinase substrate motif;GSK-3, ERK1, ERK2, CDK5 substrate motif;WW domain binding motif
1.69235	1.18978	1.22836	2.17531	1.26538	2.21998	0.840782	0.929014	1.37012	1.49321	1.23752	1.92567	1.42306	0.983846	1.73905	1.20509	1.07268	1.37729	1.50388	1.35519	0.904159	0.0489155	1.0716	2.59286	NaN	2.00843	NaN	1.51808	0.32904	0.898831	1.87572	1.41737	1.9248	1.54326	0.586974	NaN	1.43707	1.34665	1.42296	NaN	1.51666	1.35519	1.43001	-0.0748226	0.37162	0.666671	S	2	___1	14-3-3 domain binding motif;Akt kinase substrate motif;AMP-activated protein kinase 2 substrate motif;Calmodulin-dependent protein kinase II substrate motif;DNA dependent Protein kinase substrate motif;MAPKAPK1 kinase substrate motif;PKA kinase substrate motif;PKC kinase substrate motif
2.01468	1.5115	1.65578	3.1312	3.25642	2.74959	2.54021	2.55673	2.19641	2.58577	2.93767	3.0081	3.34124	2.93843	3.38776	1.5581	1.27929	3.21868	3.19793	1.90934	2.19208	2.48332	2.70833	NaN	NaN	2.6159	2.87182	3.45023	2.65701	2.06843	2.64597	1.94964	1.45935	2.44952	1.58316	1.94733	2.66649	1.81197	2.55641	2.97804	2.88731	2.60084	2.55641	0.0444251	0.489208	0.472305	S	3	___1	Casein kinase II substrate motif;Cdc2 kinase substrate motif;CDK kinase substrate motif;CDK1,2,4,6 kinase substrate motif;ERK1,2 kinase substrate motif;Growth associated histone HI kinase substrate motif;GSK-3, ERK1, ERK2, CDK5 substrate motif;MAPKAPK2 kinase substrate motif;WW domain binding motif
NaN	NaN	NaN	-0.358959	NaN	NaN	NaN	NaN	NaN	NaN	0.778449	-0.360338	NaN	-1.17402	0.600722	-0.154539	-1.33596	0.652004	NaN	0.26663	NaN	0.358262	NaN	NaN	NaN	-1.48999	NaN	NaN	0.43529	NaN	NaN	0.175081	-0.87099	NaN	NaN	NaN	NaN	-0.535191	NaN	0.216848	-0.758433	-0.154539	-0.180055	0.0255163	0.470224	0.950814	S	3	___2	Casein kinase I substrate motif;Casein kinase II substrate motif;ERK1,2 kinase substrate motif;G protein-coupled receptor kinase 1 substrate motif;GSK3 kinase substrate motif;GSK-3, ERK1, ERK2, CDK5 substrate motif;WW domain binding motif
NaN	NaN	NaN	-0.358959	NaN	NaN	NaN	NaN	NaN	NaN	NaN	-0.360338	NaN	-1.17402	-0.186751	-0.154539	-1.33596	0.652004	NaN	NaN	NaN	0.358262	NaN	NaN	NaN	-1.48999	NaN	NaN	0.282143	NaN	NaN	0.175081	-0.87099	NaN	NaN	NaN	NaN	-0.535191	NaN	0.216848	-0.758433	-0.358959	-0.180055	-0.178904	0.277643	0.551073	S	3	___2	Casein kinase II substrate motif;Cdc2 kinase substrate motif;CDK kinase substrate motif;CDK1,2,4,6 kinase substrate motif;ERK1,2 kinase substrate motif;Growth associated histone HI kinase substrate motif;GSK-3, ERK1, ERK2, CDK5 substrate motif;MAPKAPK2 kinase substrate motif;WW domain binding motif
-0.532567	0.04624	0.0164112	0.171709	0.673315	0.294845	-0.0422051	-0.0297982	0.348027	-0.740635	-0.359464	0.504742	0.929345	0.755081	-0.706304	-0.10701	-0.887931	0.364549	NaN	-0.185867	0.497523	-0.0656105	-0.193942	NaN	NaN	NaN	NaN	0.415691	-0.99269	-1.0567	0.282421	0.146525	-0.556839	-0.533953	0.433689	-0.165737	-1.29883	-0.625153	-0.735951	-1.06879	-0.36935	-0.00669349	-0.545396	0.538703	0.0646357	0.0189174	S	3	___2	AMP-activated protein kinase substrate motif;Casein kinase II substrate motif;HMGCoA Reductase kinase substrate motif
-0.532567	0.04624	0.0164112	0.171709	0.673315	0.294845	-0.0422051	-0.0297982	0.348027	-0.740635	-0.359464	0.504742	0.929345	0.755081	-0.706304	-0.10701	-0.887931	0.364549	NaN	-0.185867	0.497523	-0.0656105	-0.193942	NaN	NaN	NaN	NaN	0.415691	-0.99269	-1.0567	0.282421	0.146525	-0.556839	-0.533953	0.433689	-0.165737	-1.29883	-0.625153	-0.735951	-1.06879	-0.36935	-0.00669349	-0.545396	0.538703	0.0646357	0.0189174	S	3	___2	b-Adrenergic Receptor kinase substrate motif;Casein kinase II substrate motif;G protein-coupled receptor kinase 1 substrate motif;Pyruvate dehydrogenase kinase substrate motif
0.736349	0.246826	0.243305	-0.652139	-1.86041	-0.441258	-1.25345	-0.18002	-0.187485	0.303111	-0.076824	0.0261246	NaN	-1.6915	0.0566977	0.539398	0.815926	-1.04339	-1.05605	0.385147	-0.767055	-0.30469	-1.34155	-0.316955	NaN	-0.791018	NaN	-0.941866	-0.109792	0.276779	-0.963097	-0.319195	0.151672	-0.137379	-0.458523	-0.355633	0.404903	0.550513	0.0781546	0.568059	0.379556	-0.246087	-0.0158186	-0.230269	0.235978	0.152844	S	2	___1	ERK1,2 kinase substrate motif;Growth associated histone HI kinase substrate motif;GSK-3, ERK1, ERK2, CDK5 substrate motif;PKA kinase substrate motif;PKC kinase substrate motif;WW domain binding motif
-0.377145	NaN	NaN	0.221417	NaN	-0.708079	NaN	NaN	-0.188434	-0.124623	-1.08711	-0.234142	NaN	NaN	NaN	-0.557267	-0.54691	NaN	NaN	-0.0112016	-0.399564	-1.40779	NaN	NaN	NaN	0.657417	NaN	NaN	NaN	-0.512266	-0.277866	0.487949	NaN	-0.192799	-0.394813	NaN	NaN	-0.0122353	0.25457	NaN	NaN	-0.377145	-0.192799	-0.184346	0.273064	0.190816	S	2	___1	Casein kinase I substrate motif;Casein kinase II substrate motif;ERK1,2 kinase substrate motif;GSK-3, ERK1, ERK2, CDK5 substrate motif;WW domain binding motif
NaN	NaN	NaN	-2.62197	NaN	-2.24282	-2.30626	-2.22009	NaN	0.125041	NaN	NaN	NaN	NaN	NaN	-2.46669	NaN	NaN	NaN	-3.26151	-2.07755	-2.39145	-2.24538	-3.02692	NaN	NaN	NaN	NaN	NaN	NaN	NaN	NaN	-2.71228	-2.68625	-2.43572	NaN	NaN	-1.72906	NaN	NaN	-2.64712	-2.30626	-2.64712	0.34086	0.185045	0.555374	S	3	___1	14-3-3 domain binding motif;Aurora-A kinase substrate motif;Calmodulin-dependent protein kinase II substrate motif;Casein kinase II substrate motif;G protein-coupled receptor kinase 1 substrate motif;GSK3 kinase substrate motif;PAK2 kinase substrate motif;Phosphorylase kinase substrate motif;PKA kinase substrate motif;PKC epsilon kinase substrate motif;PKC kinase substrate motif
NaN	NaN	-2.08527	-1.74314	NaN	-1.61721	-0.906323	-1.56901	NaN	0.0533639	-1.26327	-1.33765	NaN	-0.790491	NaN	-2.17356	-2.06275	NaN	-0.589186	-1.81919	-1.29222	NaN	NaN	-0.90466	NaN	-1.73761	NaN	-1.54804	-1.92873	-1.87701	NaN	-0.91673	-1.6253	-1.8008	-1.77684	-2.17689	NaN	-1.48799	-1.74463	-2.36971	-1.68395	-1.45333	-1.76073	0.307407	0.214369	0.0512592	S	3	___2	ERK1,2 kinase substrate motif;G protein-coupled receptor kinase 1 substrate motif;GSK-3, ERK1, ERK2, CDK5 substrate motif;PKA kinase substrate motif;PKC kinase substrate motif;WW domain binding motif
NaN	NaN	-2.08527	-1.74314	NaN	-1.61721	-0.906323	-1.56901	NaN	0.0533639	-1.26327	-1.33765	NaN	-0.790491	NaN	-2.17356	-2.06275	NaN	-0.589186	-1.93535	-1.29222	NaN	NaN	-0.90466	NaN	-1.73761	NaN	-1.54804	-1.92873	-1.87701	NaN	-0.91673	-1.6253	-1.8008	-1.77684	-2.17689	NaN	-1.48799	-1.74463	-2.36971	-1.68395	-1.45333	-1.76073	0.307407	0.214369	0.0571978	S	3	___2	Casein kinase II substrate motif;ERK1,2 kinase substrate motif;G protein-coupled receptor kinase 1 substrate motif;GSK-3, ERK1, ERK2, CDK5 substrate motif;WW domain binding motif
-0.722887	0.058397	-0.0786933	0.145925	0.33125	-0.118849	0.232911	-0.445027	0.32229	-0.868428	0.0104086	-0.115789	0.276494	-0.483057	NaN	-3.21057	NaN	NaN	-1.13703	-0.0430092	0.202179	-0.41177	0.530299	-0.227663	NaN	0.494837	0.177483	-0.234189	NaN	NaN	0.138339	NaN	-0.425906	-0.342743	-0.215017	-0.321368	0.1132	-0.270297	-0.32073	NaN	0.415071	-0.0608512	-0.234189	0.173338	0.355413	0.522888	S	2	___1	Casein kinase II substrate motif;ERK1,2 kinase substrate motif;Growth associated histone HI kinase substrate motif;GSK-3, ERK1, ERK2, CDK5 substrate motif;PKA kinase substrate motif;PKC kinase substrate motif;Pyruvate dehydrogenase kinase substrate motif;WW domain binding motif
-0.478449	0.216936	NaN	NaN	NaN	-0.147806	0.820368	NaN	0.189174	-0.567892	NaN	0.154315	1.42424	-0.0939846	NaN	0.4051	NaN	NaN	NaN	-0.00341079	0.522453	NaN	NaN	NaN	NaN	NaN	NaN	NaN	-0.522851	-0.776084	NaN	-0.46554	-0.475687	-0.252317	NaN	NaN	-0.311102	NaN	NaN	-0.453594	NaN	0.171744	-0.46554	0.637284	0.0339061	0.00154692	S	3	___3	14-3-3 domain binding motif;Calmodulin-dependent protein kinase II substrate motif;ERK1,2 kinase substrate motif;G protein-coupled receptor kinase 1 substrate motif;GSK3 kinase substrate motif;GSK-3, ERK1, ERK2, CDK5 substrate motif;PKA kinase substrate motif;PKC epsilon kinase substrate motif;PKC kinase substrate motif;WW domain binding motif
-0.478449	0.216936	NaN	NaN	NaN	-0.147806	0.820368	NaN	0.189174	-0.567892	NaN	0.154315	1.42424	-0.0939846	NaN	0.4051	NaN	NaN	NaN	-0.00341079	0.522453	NaN	NaN	NaN	NaN	NaN	NaN	NaN	-0.522851	-0.776084	NaN	-0.46554	-0.475687	-0.252317	NaN	NaN	-0.311102	NaN	NaN	-0.453594	NaN	0.171744	-0.46554	0.637284	0.0339061	0.00154692	S	3	___3	DNA dependent Protein kinase substrate motif;ERK1,2 kinase substrate motif;G protein-coupled receptor kinase 1 substrate motif;GSK-3, ERK1, ERK2, CDK5 substrate motif;WW domain binding motif
-0.478449	0.216936	NaN	NaN	NaN	-0.147806	0.820368	NaN	0.189174	-0.567892	NaN	0.154315	1.42424	-0.0939846	NaN	0.4051	NaN	NaN	NaN	-0.00341079	0.522453	NaN	NaN	NaN	NaN	NaN	NaN	NaN	-0.522851	-0.776084	NaN	-0.46554	-0.475687	-0.252317	NaN	NaN	-0.311102	NaN	NaN	-0.453594	NaN	0.171744	-0.46554	0.637284	0.0339061	0.00154692	S	4	___3	CDK4 kinase substrate motif;ERK1,2 kinase substrate motif;G protein-coupled receptor kinase 1 substrate motif;GSK3 kinase substrate motif;GSK-3, ERK1, ERK2, CDK5 substrate motif;WW domain binding motif
-0.401758	NaN	NaN	NaN	NaN	-0.291828	0.112169	NaN	1.02197	-0.358879	-0.269056	-0.501093	NaN	-0.319163	NaN	-0.766784	-0.857638	-0.564051	NaN	NaN	-0.300194	-0.0136189	-0.370254	NaN	NaN	-0.965915	NaN	0.148569	NaN	0.188392	-0.240714	-0.286831	-0.333945	-0.203124	-0.301998	NaN	-0.584475	-0.658273	NaN	NaN	NaN	-0.358879	-0.286831	-0.0720487	0.374266	0.650849	S	3	___1	14-3-3 domain binding motif;Calmodulin-dependent protein kinase II substrate motif;Casein kinase II substrate motif;ERK1,2 kinase substrate motif;G protein-coupled receptor kinase 1 substrate motif;Growth associated histone HI kinase substrate motif;GSK-3, ERK1, ERK2, CDK5 substrate motif;PKA kinase substrate motif;PKC kinase substrate motif;Pyruvate dehydrogenase kinase substrate motif;WW domain…
NaN	-0.336462	0.227798	0.113909	-0.144095	-0.699531	0.315758	0.298112	0.804751	-0.0157015	0.140123	-0.117855	NaN	0.0371823	-0.107474	-1.09599	-0.143463	0.328818	-1.38987	-0.436237	-0.492802	-0.510684	-0.161392	-0.875947	NaN	0.0304891	NaN	0.0786441	-0.0980609	-0.185769	0.197659	-0.265843	-0.808201	-0.610803	-0.509662	-0.561994	-0.824129	-0.202818	-0.098019	-0.197462	-0.264462	-0.117855	-0.23364	0.115785	0.424579	0.348463	S	3	___1	14-3-3 domain binding motif;Akt kinase substrate motif;Calmodulin-dependent protein kinase II substrate motif;Cdc2 kinase substrate motif;CDK kinase substrate motif;CDK1,2,4,6 kinase substrate motif;ERK1,2 kinase substrate motif;G protein-coupled receptor kinase 1 substrate motif;Growth associated histone HI kinase substrate motif;GSK-3, ERK1, ERK2, CDK5 substrate motif;MAPKAPK1 kinase substrate …
NaN	NaN	NaN	NaN	-0.506959	0.99086	2.17235	NaN	1.37464	NaN	NaN	1.79947	NaN	1.16259	NaN	0.590995	0.280773	NaN	NaN	2.81886	1.07104	NaN	NaN	0.951788	NaN	2.60942	NaN	NaN	-0.72153	-0.541414	NaN	NaN	1.65657	0.537103	NaN	NaN	0.166896	0.602259	0.858833	NaN	NaN	1.11681	0.537103	0.579709	0.0499201	0.0454131	S	3	___1	G protein-coupled receptor kinase 1 substrate motif;MAPKAPK2 kinase substrate motif
1.46836	NaN	NaN	1.48458	NaN	NaN	NaN	2.98509	NaN	NaN	NaN	NaN	NaN	NaN	NaN	NaN	NaN	NaN	NaN	1.04759	0.607509	NaN	-1.34878	2.38131	NaN	0.578384	NaN	NaN	NaN	NaN	NaN	2.7797	1.1036	0.533832	-1.58714	NaN	NaN	1.09348	NaN	NaN	NaN	1.25798	1.09348	0.164499	0.365791	0.675909	S	2	___1	14-3-3 domain binding motif;Aurora-A kinase substrate motif;Calmodulin-dependent protein kinase II substrate motif;PAK2 kinase substrate motif;Phosphorylase kinase substrate motif;Pim1 kinase substrate sequence;PKA kinase substrate motif;PKC epsilon kinase substrate motif;PKC kinase substrate motif
NaN	-0.0328769	NaN	0.946331	NaN	NaN	1.40951	0.954466	NaN	NaN	NaN	1.14391	NaN	0.343618	NaN	0.540783	0.39994	NaN	0.261957	1.62212	0.217318	1.36206	2.34816	NaN	NaN	NaN	NaN	NaN	NaN	0.0319222	NaN	NaN	1.54226	2.52979	0.592816	NaN	NaN	0.966592	0.342709	NaN	0.935599	0.946331	0.935599	0.0107316	0.455426	0.779331	S	2	___1	ERK1,2 kinase substrate motif;GSK-3, ERK1, ERK2, CDK5 substrate motif;WW domain binding motif
1.77774	NaN	NaN	NaN	2.24631	NaN	4.35348	2.69969	2.28967	0.449977	2.23279	2.57557	NaN	NaN	NaN	NaN	NaN	NaN	NaN	2.1409	1.50584	1.39671	1.74114	NaN	NaN	NaN	NaN	NaN	NaN	0.981554	1.80027	1.88051	1.80987	3.2491	1.44343	NaN	NaN	1.50543	1.16717	NaN	NaN	2.18684	1.65285	0.533995	0.0665212	0.300324	S	2	___2	ERK1,2 kinase substrate motif;GSK-3, ERK1, ERK2, CDK5 substrate motif;WW domain binding motif
1.81997	1.3663	0.287248	NaN	2.24631	2.60861	4.19066	2.5268	2.33883	0.556752	2.23279	2.57557	NaN	1.63237	2.52415	1.37253	0.940233	NaN	NaN	2.01473	1.50584	NaN	1.43848	2.26929	NaN	2.52233	NaN	NaN	-0.381666	1.10457	1.70096	1.88051	2.05287	3.1365	1.44343	NaN	NaN	1.50543	1.35983	NaN	1.9079	2.12376	1.60319	0.520568	0.0721329	0.281088	T	3	___2	G protein-coupled receptor kinase 1 substrate motif;GSK-3, ERK1, ERK2, CDK5 substrate motif;PKA kinase substrate motif;PKC kinase substrate motif;WW domain binding motif
NaN	NaN	NaN	NaN	0.217124	-0.321609	0.212738	NaN	0.1009	-0.327627	0.191671	0.137182	NaN	0.507978	NaN	-0.0507994	-0.582912	-0.399938	-0.126608	-0.175073	-0.0547053	0.282438	-0.230147	NaN	NaN	NaN	NaN	NaN	-0.253858	-0.394631	-0.226124	NaN	-0.356948	-0.194986	-0.000585092	0.239168	NaN	-0.12386	NaN	NaN	NaN	-0.0527523	-0.210555	0.157803	0.373722	0.238833	S	3	___2	Casein kinase I substrate motif;Cdc2 kinase substrate motif;CDK kinase substrate motif;CDK1,2,4,6 kinase substrate motif;DNA dependent Protein kinase substrate motif;ERK1,2 kinase substrate motif;G protein-coupled receptor kinase 1 substrate motif;GSK3 kinase substrate motif;GSK-3, ERK1, ERK2, CDK5 substrate motif;MAPKAPK2 kinase substrate motif;WW domain binding motif
NaN	NaN	NaN	NaN	0.217124	-0.321609	0.212738	NaN	0.1009	-0.327627	0.191671	0.137182	NaN	0.507978	NaN	-0.0507994	-0.582912	-0.399938	-0.126608	-0.175073	-0.0547053	0.282438	-0.230147	NaN	NaN	NaN	NaN	NaN	-0.253858	-0.394631	-0.226124	NaN	-0.356948	-0.194986	-0.000585092	0.239168	NaN	-0.12386	NaN	NaN	NaN	-0.0527523	-0.210555	0.157803	0.373722	0.238833	S	3	___2	ERK1,2 kinase substrate motif;G protein-coupled receptor kinase 1 substrate motif;Growth associated histone HI kinase substrate motif;GSK-3, ERK1, ERK2, CDK5 substrate motif;MAPKAPK2 kinase substrate motif;WW domain binding motif
NaN	-0.0474225	NaN	0.299778	0.0685036	0.0837729	NaN	-0.0125828	NaN	NaN	0.212324	0.217239	NaN	0.546682	-0.0475264	0.0948251	0.0166898	0.112695	NaN	0.162671	0.258619	NaN	0.100822	NaN	NaN	0.115461	NaN	NaN	NaN	-0.108028	0.115429	NaN	-0.00773153	NaN	0.232831	NaN	NaN	0.0989786	NaN	NaN	-0.0232829	0.106759	0.0456235	0.061135	0.492523	0.198488	S	3	___3	Casein kinase I substrate motif;Cdc2 kinase substrate motif;CDK kinase substrate motif;CDK1,2,4,6 kinase substrate motif;DNA dependent Protein kinase substrate motif;ERK1,2 kinase substrate motif;G protein-coupled receptor kinase 1 substrate motif;GSK3 kinase substrate motif;GSK-3, ERK1, ERK2, CDK5 substrate motif;MAPKAPK2 kinase substrate motif;WW domain binding motif
NaN	-0.0474225	NaN	0.299778	0.0685036	0.0837729	NaN	-0.0125828	NaN	NaN	0.212324	0.217239	NaN	0.546682	-0.0475264	0.0948251	0.0166898	0.112695	NaN	0.162671	0.258619	NaN	0.100822	NaN	NaN	0.115461	NaN	NaN	NaN	-0.108028	0.115429	NaN	-0.00773153	NaN	0.232831	NaN	NaN	0.0989786	NaN	NaN	-0.0232829	0.106759	0.0456235	0.061135	0.492523	0.198488	S	3	___3	ERK1,2 kinase substrate motif;G protein-coupled receptor kinase 1 substrate motif;Growth associated histone HI kinase substrate motif;GSK-3, ERK1, ERK2, CDK5 substrate motif;MAPKAPK2 kinase substrate motif;WW domain binding motif
NaN	-0.0474225	NaN	0.299778	0.0685036	0.0837729	NaN	NaN	NaN	NaN	0.212324	0.217239	NaN	0.546682	-0.0475264	0.0948251	0.0166898	0.112695	NaN	0.162671	0.258619	NaN	0.100822	NaN	NaN	0.115461	NaN	NaN	NaN	NaN	0.115429	NaN	-0.00773153	NaN	0.232831	NaN	NaN	0.119018	NaN	NaN	-0.0232829	0.112695	0.115429	-0.00273388	0.442001	0.355025	S	3	___3	Casein kinase II substrate motif;ERK1,2 kinase substrate motif;GSK-3, ERK1, ERK2, CDK5 substrate motif;WW domain binding motif
3.5064	NaN	NaN	NaN	NaN	NaN	NaN	3.488	NaN	4.20043	3.78044	NaN	NaN	NaN	NaN	NaN	NaN	NaN	NaN	NaN	6.25998	NaN	NaN	NaN	NaN	NaN	NaN	NaN	NaN	NaN	NaN	NaN	NaN	2.22344	3.93499	NaN	2.52749	2.03417	NaN	NaN	5.91754	3.78044	2.52749	1.25295	8.57228e-05	0.337147	S	2	___1	AMP-activated protein kinase substrate motif;PKA kinase substrate motif
-0.467796	-0.803744	NaN	NaN	NaN	NaN	NaN	NaN	-0.632042	NaN	-0.380826	-1.1385	NaN	-0.285964	-1.30988	-0.996945	NaN	NaN	NaN	NaN	-0.502669	-0.559444	0.764125	NaN	NaN	NaN	NaN	NaN	NaN	NaN	-0.79217	NaN	-0.296761	-1.531	NaN	NaN	-0.679112	-1.47548	NaN	NaN	NaN	-0.559444	-0.79217	0.232726	0.288742	0.225991	S	2	___1	ERK1,2 kinase substrate motif;Growth associated histone HI kinase substrate motif;GSK-3, ERK1, ERK2, CDK5 substrate motif;PKA kinase substrate motif;PKC kinase substrate motif;WW domain binding motif
0.856466	0.508452	0.692517	0.704381	-0.310207	-0.121384	-0.383086	-0.174299	0.0436546	0.169726	1.41578	0.104839	0.631431	-0.493499	0.462355	0.10867	-0.291281	0.463555	0.783769	0.573008	0.35686	0.871458	0.334895	0.732915	NaN	-0.285157	NaN	1.57875	0.550236	0.145714	-0.893191	0.191942	-0.369865	-0.114725	0.392527	2.2379	1.14481	-0.0431557	0.12955	NaN	0.317795	0.35686	0.191942	0.164918	0.365298	0.708354	S	2	___1	Casein kinase II substrate motif;PKA kinase substrate motif;PKC kinase substrate motif
NaN	NaN	NaN	NaN	0.233071	-2.09036	NaN	NaN	0.00910997	NaN	-0.0695485	NaN	NaN	NaN	NaN	-0.303958	-1.36093	NaN	NaN	NaN	-0.3544	0.188001	NaN	-1.3613	NaN	NaN	NaN	NaN	NaN	NaN	-0.826783	NaN	-1.14673	-0.840833	0.207951	NaN	NaN	-1.29504	NaN	NaN	NaN	-0.303958	-0.840833	0.536874	0.065363	0.588381	S	3	___1	14-3-3 domain binding motif;Akt kinase substrate motif;Calmodulin-dependent protein kinase II substrate motif;Casein kinase II substrate motif;ERK1,2 kinase substrate motif;GSK-3, ERK1, ERK2, CDK5 substrate motif;MAPKAPK1 kinase substrate motif;PKA kinase substrate motif;PKC epsilon kinase substrate motif;PKC kinase substrate motif;Pyruvate dehydrogenase kinase substrate motif;WW domain binding m…
-1.53315	-1.10078	-2.02719	-1.13121	-0.813287	-2.31579	-1.68584	-2.12754	-1.34108	NaN	-0.834347	-0.547677	-0.913568	-0.363711	-1.6403	-1.91575	-2.01689	-0.781723	-0.920579	-2.23496	-0.621958	-1.28584	-1.14512	-2.02987	NaN	-2.19813	NaN	-2.00321	-1.79679	NaN	-0.964097	-1.07452	-0.817735	-1.17798	-0.655997	-0.715485	-1.5327	-0.838287	NaN	-1.60991	-2.05907	-1.31346	-1.12625	-0.18721	0.27067	0.515729	S	3	___1	ERK1,2 kinase substrate motif;GSK-3, ERK1, ERK2, CDK5 substrate motif;PKA kinase substrate motif;PKC kinase substrate motif;WW domain binding motif
-0.897114	NaN	NaN	-1.36075	-1.11216	-1.1715	-0.736327	-0.857946	-0.540721	-1.04752	-0.785462	NaN	NaN	-1.13704	-1.03086	-1.37877	-1.57149	-1.1948	NaN	-0.932368	-1.28495	-0.756933	-1.17551	NaN	NaN	NaN	NaN	NaN	-1.01182	NaN	-1.46747	NaN	-1.90562	-1.22823	NaN	NaN	NaN	-1.15444	NaN	NaN	-1.27243	-1.07984	-1.25033	0.170489	0.358747	0.082495	S	3	___1	Cdc2 kinase substrate motif;CDK kinase substrate motif;CDK1,2,4,6 kinase substrate motif;ERK1,2 kinase substrate motif;Growth associated histone HI kinase substrate motif;GSK-3, ERK1, ERK2, CDK5 substrate motif;MAPKAPK2 kinase substrate motif;WW domain binding motif
NaN	NaN	NaN	NaN	NaN	NaN	-1.3381	-1.12029	NaN	NaN	NaN	-0.201944	NaN	NaN	NaN	-0.663802	-2.77185	-1.18402	NaN	NaN	-3.03992	-0.981314	NaN	NaN	NaN	NaN	NaN	-1.23027	-1.19392	NaN	-0.920695	NaN	0.375192	NaN	-1.46491	NaN	NaN	NaN	-1.42078	NaN	-1.5496	-1.15216	-1.23027	0.07811	0.471302	0.425984	S	3	___2	Cdc2 kinase substrate motif;CDK kinase substrate motif;CDK1,2,4,6 kinase substrate motif;ERK1,2 kinase substrate motif;Growth associated histone HI kinase substrate motif;GSK-3, ERK1, ERK2, CDK5 substrate motif;MAPKAPK2 kinase substrate motif;WW domain binding motif
2.4206	2.36677	NaN	2.17044	0.896204	1.26169	1.79708	0.321008	1.52869	1.35103	3.15731	NaN	NaN	-0.696523	1.75448	1.83572	2.49952	1.75538	NaN	0.616437	1.43731	3.22618	2.85801	1.10125	NaN	2.13981	NaN	1.83148	4.05771	2.64367	0.389686	NaN	3.28603	1.27625	1.99413	3.8421	2.40271	1.68936	2.02521	3.03283	1.38776	1.75538	2.02521	-0.269828	0.206396	0.112415	S	2	___1	DNA dependent Protein kinase substrate motif;ERK1,2 kinase substrate motif;Growth associated histone HI kinase substrate motif;GSK-3, ERK1, ERK2, CDK5 substrate motif;PKA kinase substrate motif;PKC kinase substrate motif;WW domain binding motif
-0.371265	NaN	NaN	NaN	NaN	NaN	NaN	NaN	NaN	2.65656	NaN	2.68729	NaN	NaN	NaN	1.7099	NaN	NaN	NaN	NaN	2.06525	NaN	NaN	NaN	NaN	NaN	NaN	NaN	1.97701	NaN	1.27081	NaN	3.20849	2.22025	NaN	NaN	NaN	2.35772	NaN	NaN	NaN	2.06525	2.22025	-0.154999	0.29819	0.502252	S	3	___1	Casein kinase II substrate motif;PKA kinase substrate motif;PKC kinase substrate motif
1.72217	1.61167	NaN	NaN	0.471197	0.675536	NaN	NaN	NaN	1.91523	3.14876	NaN	NaN	-0.526783	1.7171	1.59369	NaN	1.37499	NaN	0.934246	NaN	2.23558	NaN	0.140202	NaN	NaN	NaN	1.96136	2.40753	2.05758	1.63392	NaN	2.13964	2.30942	NaN	NaN	0.536476	1.75224	1.39717	2.30517	1.69703	1.59369	1.96136	-0.367664	0.143314	0.107017	S	3	___1	Casein kinase II substrate motif;MAPKAPK2 kinase substrate motif;PKA kinase substrate motif;PKC kinase substrate motif
0.447956	1.81921	1.04223	0.101511	-0.204985	NaN	0.951697	NaN	2.42598	1.91523	0.196389	1.70735	1.1316	NaN	0.933852	1.0994	1.91431	-0.58201	NaN	0.150253	-0.678888	3.12551	2.18358	0.696678	NaN	-1.6057	NaN	1.96136	2.52376	NaN	-0.751148	NaN	2.54834	2.28371	0.224504	2.44468	2.48946	2.01477	0.891735	2.30517	NaN	0.951697	2.28371	-1.33202	0.000236342	0.0612372	S	2	___1	Casein kinase II substrate motif
0.669289	NaN	NaN	0.852036	-0.914364	NaN	NaN	-0.360102	1.02702	NaN	0.765404	NaN	NaN	NaN	1.2156	0.697699	1.02623	0.505057	NaN	0.0802142	0.00377455	NaN	1.0492	NaN	NaN	2.3216	NaN	NaN	1.64464	1.08302	-0.749671	NaN	2.86298	0.539082	-0.203923	0.953741	NaN	0.727006	NaN	NaN	0.773329	0.731551	0.773329	-0.0417778	0.403503	0.610897	S	3	___1	Casein kinase I substrate motif;ERK1,2 kinase substrate motif;Growth associated histone HI kinase substrate motif;GSK-3, ERK1, ERK2, CDK5 substrate motif;MDC1 BRCT domain binding motif;PKA kinase substrate motif;PKC kinase substrate motif;Plk1 PBD domain binding motif;WW domain binding motif
1.81601	1.61237	1.51054	1.16784	-0.497611	-1.40934	NaN	0.13536	2.06557	1.12014	3.21938	1.55833	NaN	NaN	1.83886	1.42367	2.19517	1.24938	NaN	1.14194	0.788554	3.34151	2.08022	0.220759	NaN	1.91709	NaN	2.52208	2.05066	1.57525	-0.311478	NaN	2.3021	1.40621	1.77727	2.75083	1.90988	1.36489	1.2868	2.05985	1.42145	1.51054	1.77727	-0.266727	0.208632	0.290632	S	2	___1	Casein kinase I substrate motif;Casein kinase II substrate motif;ERK1,2 kinase substrate motif;GSK-3, ERK1, ERK2, CDK5 substrate motif;MDC1 BRCT domain binding motif;Plk1 PBD domain binding motif;WW domain binding motif
3.08706	1.02995	NaN	NaN	-0.200368	NaN	NaN	NaN	1.3869	NaN	3.79301	2.38589	NaN	NaN	NaN	NaN	NaN	0.950527	NaN	1.37348	NaN	4.40092	3.42551	NaN	NaN	NaN	NaN	NaN	3.44902	3.2023	NaN	NaN	3.07121	2.21233	NaN	2.85601	NaN	1.44361	1.74653	2.23525	NaN	1.8864	2.54563	-0.659231	0.0359056	0.506965	S	2	___1	ERK1,2 kinase substrate motif;Growth associated histone HI kinase substrate motif;GSK-3, ERK1, ERK2, CDK5 substrate motif;PKA kinase substrate motif;PKC kinase substrate motif;WW domain binding motif
0.221437	1.1857	-0.332847	0.648453	0.516283	-0.160318	2.25779	-2.05854	1.19134	0.0265294	2.95827	0.886054	0.3739	-1.37673	1.73798	0.64666	2.11632	-1.06276	-0.443339	0.248747	1.14186	2.68631	2.97786	-0.875947	NaN	-0.425653	0.507849	1.05879	1.84003	1.75233	1.25925	-1.32062	3.7244	1.87982	1.98305	2.69375	1.84507	1.98036	1.34831	1.62961	2.12381	0.516283	1.84003	-1.32375	0.00025549	0.0131866	S	2	___1	Casein kinase II substrate motif
1.28298	NaN	NaN	NaN	NaN	NaN	NaN	NaN	2.68945	NaN	NaN	2.12902	NaN	NaN	2.85476	NaN	2.88478	NaN	NaN	NaN	2.36713	NaN	3.18943	NaN	NaN	NaN	NaN	NaN	NaN	2.42437	1.88693	NaN	2.24186	2.47694	NaN	NaN	NaN	1.5356	1.2717	NaN	1.39448	2.68945	1.88693	0.802521	0.00952272	0.0767425	S	2	___1	G protein-coupled receptor kinase 1 substrate motif;PKA kinase substrate motif;PKC kinase substrate motif
3.62366	NaN	NaN	NaN	NaN	NaN	NaN	2.20104	NaN	NaN	NaN	NaN	NaN	NaN	4.2661	3.9302	4.43854	NaN	NaN	2.33064	3.93967	NaN	2.8926	NaN	NaN	NaN	NaN	NaN	NaN	2.75233	2.06466	NaN	4.06203	4.42514	3.32514	NaN	4.11259	3.55736	2.1534	NaN	NaN	3.77693	3.44125	0.335682	0.189413	0.746142	S	2	___1
1.41102	NaN	NaN	NaN	NaN	NaN	NaN	NaN	NaN	NaN	3.17549	NaN	NaN	NaN	NaN	1.62125	NaN	NaN	NaN	1.28686	2.83858	4.43566	3.7808	NaN	NaN	1.98389	NaN	NaN	NaN	2.83688	1.81586	NaN	3.64234	2.33949	3.52211	NaN	NaN	2.19	NaN	NaN	3.26922	2.41124	2.83688	-0.425638	0.112824	0.641757	S	2	___1	Casein kinase II substrate motif;PKA kinase substrate motif
NaN	-0.457378	NaN	NaN	NaN	NaN	1.75642	NaN	NaN	NaN	2.36559	-0.450582	NaN	NaN	NaN	NaN	2.30135	NaN	NaN	NaN	1.39918	NaN	NaN	NaN	NaN	-0.422719	NaN	-0.342812	NaN	2.01832	NaN	NaN	3.40439	1.49518	1.31358	NaN	NaN	1.80156	NaN	NaN	2.82002	1.39918	1.80156	-0.402372	0.124453	0.226558	S	2	___1	PKA kinase substrate motif
NaN	NaN	NaN	NaN	NaN	1.13406	NaN	NaN	1.76199	NaN	NaN	1.35796	NaN	NaN	NaN	1.54	3.69741	NaN	NaN	-0.423768	2.79598	NaN	2.70944	NaN	NaN	NaN	NaN	0.784524	NaN	2.86364	2.94239	-0.0355033	3.99982	0.235701	2.17337	NaN	2.38803	1.23677	NaN	NaN	NaN	1.65099	2.17337	-0.52238	0.0727738	0.973412	S	2	___1	G protein-coupled receptor kinase 1 substrate motif;GSK3 kinase substrate motif;PKA kinase substrate motif;PKC kinase substrate motif
1.49994	2.25759	1.28694	1.69495	0.255718	1.27339	3.0856	0.687899	1.95189	1.7775	3.03878	1.56841	1.14545	-0.873241	1.88642	2.1027	3.25121	-0.119161	1.8537	1.13348	1.73626	3.47796	2.44984	1.72396	2.5303	1.93236	1.88323	1.99507	2.91807	2.37827	1.11444	0.589508	3.86038	2.69695	1.93049	3.70522	2.57917	2.46118	2.09717	2.86494	2.22976	1.75688	2.37827	-0.621391	0.0441014	0.0378549	S	2	___1	Casein kinase II substrate motif;ERK1,2 kinase substrate motif;Growth associated histone HI kinase substrate motif;GSK-3, ERK1, ERK2, CDK5 substrate motif;PKA kinase substrate motif;WW domain binding motif
0.0128536	1.40142	NaN	0.295815	NaN	NaN	NaN	NaN	1.07441	NaN	NaN	NaN	NaN	NaN	0.524648	-0.195655	0.630385	NaN	NaN	NaN	NaN	3.46693	2.24029	NaN	NaN	NaN	NaN	1.08106	1.28789	1.58143	0.952697	NaN	2.5277	1.81608	NaN	NaN	NaN	1.37574	1.19357	NaN	NaN	0.630385	1.33181	-0.701427	0.028283	0.342196	S	3	___1	G protein-coupled receptor kinase 1 substrate motif;GSK3 kinase substrate motif;PKA kinase substrate motif;PKC kinase substrate motif
-0.0604337	NaN	-0.633816	NaN	NaN	NaN	NaN	NaN	0.428665	-0.610903	NaN	1.34912	NaN	NaN	NaN	0.629347	0.233435	NaN	NaN	NaN	NaN	3.45568	NaN	NaN	NaN	NaN	NaN	0.0332157	1.6925	NaN	0.623409	NaN	1.93464	0.938719	1.46351	NaN	NaN	0.855153	0.742362	NaN	NaN	0.33105	0.896936	-0.565886	0.0587823	0.419219	S	3	___1	G protein-coupled receptor kinase 1 substrate motif;PKA kinase substrate motif;PKC kinase substrate motif
1.13462	1.06574	0.584747	1.02722	-0.238556	-0.129627	0.366915	NaN	2.17901	0.7003	NaN	1.41376	0.0915224	-1.25178	1.83477	1.33289	2.49348	-0.256989	NaN	0.499408	0.903474	3.6617	1.70977	-0.798675	NaN	1.89012	NaN	1.62181	1.86828	1.1271	0.0922157	-0.75244	2.89381	2.26794	1.4467	3.03238	1.72603	1.61644	0.664674	2.25048	1.24752	0.965349	1.61913	-0.653776	0.0370038	0.118232	S	2	___1	Casein kinase II substrate motif;ERK1,2 kinase substrate motif;G protein-coupled receptor kinase 1 substrate motif;GSK3 kinase substrate motif;GSK-3, ERK1, ERK2, CDK5 substrate motif;WW domain binding motif
3.23758	3.62577	2.04893	2.82015	2.8071	2.69945	5.73829	1.05267	3.50127	2.43927	5.50554	2.76019	NaN	NaN	4.25874	2.42653	3.78248	2.58916	NaN	NaN	3.44403	5.01795	4.69776	NaN	NaN	3.0221	NaN	3.74823	4.05635	3.3617	3.43633	NaN	3.0559	4.26567	3.65299	5.37542	4.5189	3.34877	2.81059	3.65784	3.99945	3.12984	3.65784	-0.528003	0.0708337	0.207498	S	2	___1	Casein kinase II substrate motif;MAPKAPK2 kinase substrate motif;Pyruvate dehydrogenase kinase substrate motif
1.5204	1.37408	1.44275	1.14512	0.230609	0.655379	2.13658	0.754589	1.38921	1.5267	2.34924	1.30149	0.52961	-0.624053	2.21685	1.44453	2.33514	1.20565	1.567	0.629072	1.16559	3.18013	1.70462	0.384644	NaN	2.09914	NaN	1.17423	2.21175	1.58058	0.774981	NaN	2.90716	2.81532	1.48902	2.46546	2.18919	2.12949	1.44292	2.0205	1.51923	1.38921	2.0205	-0.631298	0.0418223	0.0272759	S	2	___1	BARD1 BRCT domain binding motif;Casein kinase II substrate motif;G protein-coupled receptor kinase 1 substrate motif
2.68293	1.21579	NaN	2.14489	NaN	NaN	NaN	NaN	NaN	NaN	1.76098	1.21565	NaN	NaN	3.70059	0.812446	2.87592	NaN	NaN	1.40125	2.79828	3.24262	4.07508	NaN	NaN	0.870554	NaN	NaN	3.1979	NaN	2.47276	NaN	3.25723	3.8601	1.6741	NaN	2.80008	3.11507	NaN	2.72774	NaN	2.14489	2.95757	-0.812689	0.0143699	0.0922022	S	2	___1	PKA kinase substrate motif;PKC kinase substrate motif
1.21244	NaN	NaN	1.75428	NaN	0.719207	NaN	NaN	NaN	1.22583	2.19638	1.38773	NaN	-1.66428	1.50976	1.98499	2.60394	NaN	NaN	0.419697	1.43588	1.66059	1.51518	-0.782727	NaN	3.06187	NaN	1.02594	NaN	1.93512	0.777931	NaN	3.02872	1.84899	0.956811	2.37913	2.04302	2.03967	1.67518	2.28514	0.727634	1.47282	1.89206	-0.419236	0.115944	0.210987	S	2	___1	14-3-3 domain binding motif;Calmodulin-dependent protein kinase II substrate motif;Casein kinase II substrate motif;G protein-coupled receptor kinase 1 substrate motif;GSK3 kinase substrate motif;MAPKAPK1 kinase substrate motif;PKA kinase substrate motif;PKC kinase substrate motif
1.7211	1.97431	1.73593	1.73165	1.78141	1.96323	4.36711	2.21958	3.53322	1.87964	3.73894	2.45001	2.94365	1.14108	3.40393	1.60747	2.40906	1.91766	0.753408	1.12458	2.30531	3.2747	3.04476	1.1838	3.92031	3.26004	NaN	NaN	1.73856	1.41164	2.06018	NaN	1.95902	3.91245	2.30016	3.54357	2.51867	2.12985	1.07139	2.27435	3.04644	2.09694	2.2021	-0.105157	0.343103	0.921138	S	2	___1	14-3-3 domain binding motif;Akt kinase substrate motif;Calmodulin-dependent protein kinase II substrate motif;Casein kinase II substrate motif;MAPKAPK1 kinase substrate motif;PKA kinase substrate motif;PKC kinase substrate motif;Pyruvate dehydrogenase kinase substrate motif
2.10379	2.31961	1.9297	0.273929	NaN	NaN	NaN	NaN	0.763793	1.98406	1.81885	NaN	NaN	NaN	2.11946	1.66048	2.65411	NaN	NaN	NaN	2.23849	NaN	1.58777	NaN	NaN	3.73214	3.398	NaN	0.621389	NaN	NaN	1.18095	NaN	3.0702	NaN	1.41038	1.78458	NaN	NaN	1.97553	NaN	1.98406	1.78458	0.199487	0.325352	0.969726	S	2	___1	PKA kinase substrate motif
1.96788	NaN	NaN	1.46492	-0.0974694	NaN	NaN	NaN	0.594235	0.589566	2.40486	0.136202	NaN	NaN	1.04914	1.57045	2.20614	1.46166	NaN	-0.0108705	0.374879	3.49504	2.24206	NaN	NaN	0.978733	0.408783	1.53631	3.36992	2.23708	-0.194842	NaN	3.26801	0.560759	0.992739	3.27686	1.82908	1.63105	2.50333	2.07411	NaN	1.2554	1.82908	-0.573675	0.0565165	0.203912	S	3	___1	ERK1,2 kinase substrate motif;Growth associated histone HI kinase substrate motif;GSK-3, ERK1, ERK2, CDK5 substrate motif;PKA kinase substrate motif;PKC kinase substrate motif;WW domain binding motif
2.2603	1.833	NaN	NaN	0.442184	NaN	NaN	NaN	NaN	0.355608	3.20352	NaN	NaN	-1.51069	NaN	1.1963	NaN	NaN	NaN	NaN	1.04627	2.51901	2.99791	NaN	NaN	NaN	NaN	NaN	NaN	NaN	0.0181198	NaN	2.59598	2.31785	NaN	NaN	2.55831	1.198	NaN	NaN	NaN	1.51465	2.31785	-0.803202	0.0152656	0.662886	S	2	___1	ERK1,2 kinase substrate motif;Growth associated histone HI kinase substrate motif;GSK-3, ERK1, ERK2, CDK5 substrate motif;PKA kinase substrate motif;PKC kinase substrate motif;WW domain binding motif
NaN	NaN	NaN	NaN	NaN	0.926219	NaN	NaN	0.34364	2.67998	2.593	1.03115	NaN	NaN	2.78701	2.18031	NaN	NaN	1.76051	NaN	2.3548	3.54093	4.22166	0.527025	NaN	NaN	NaN	NaN	NaN	2.26114	1.4965	1.26711	2.01947	3.2314	1.86125	4.49659	NaN	2.25039	1.96895	NaN	NaN	2.26755	2.01947	0.24808	0.272512	0.62418	S	2	___1	Casein kinase II substrate motif;PKA kinase substrate motif;PKC kinase substrate motif
1.96229	1.72292	0.354541	1.20336	-0.677824	0.610203	1.64118	-1.28124	-0.128254	1.2849	2.11353	0.635116	-0.344082	-1.74482	1.42089	2.02911	2.64037	0.961606	1.23837	0.0795597	0.656905	2.57037	2.03533	0.760015	NaN	1.35019	1.62433	0.500059	2.986	2.24571	0.0425011	-0.936443	3.49481	1.11204	0.566335	3.31838	2.49231	2.10291	2.02396	2.57	0.56393	1.20336	2.02396	-0.820597	0.0136582	0.0850516	S	3	___1	14-3-3 domain binding motif;Calmodulin-dependent protein kinase II substrate motif;G protein-coupled receptor kinase 1 substrate motif;MAPKAPK1 kinase substrate motif;PKA kinase substrate motif;PKC kinase substrate motif
2.4564	2.99681	2.30294	1.73606	0.492702	0.481941	0.815044	0.508604	1.62762	2.09295	4.13917	2.37776	NaN	0.121302	2.89062	2.71257	3.50914	2.65068	NaN	NaN	2.64288	3.68619	2.26199	1.6611	NaN	2.84669	NaN	3.42164	3.11571	2.34588	1.1582	NaN	3.38348	2.52571	2.54465	4.89212	3.00117	2.49777	2.15454	3.14203	2.65141	2.34035	2.65141	-0.31106	0.17803	0.0466945	S	2	___1	14-3-3 domain binding motif;Calmodulin-dependent protein kinase II substrate motif;Calmodulin-dependent protein kinase IV substrate motif;Casein kinase II substrate motif;Chk1 kinase substrate motif;DNA dependent Protein kinase substrate motif;G protein-coupled receptor kinase 1 substrate motif;PKA kinase substrate motif;PKC kinase substrate motif
NaN	NaN	NaN	NaN	-1.41407	NaN	NaN	NaN	-1.19447	NaN	-1.5454	-1.31291	NaN	NaN	-2.58106	-2.75004	NaN	-3.37902	NaN	NaN	-3.3198	2.29398	-1.81399	-0.00181381	NaN	NaN	NaN	-2.45444	-0.854835	-1.53905	NaN	0.128459	-2.14252	2.07077	-3.59579	-1.79904	-2.34361	1.28625	-2.14558	NaN	-1.57128	-1.5454	-1.68516	0.139758	0.39535	0.66427	S	2	___1	Casein kinase II substrate motif;ERK1,2 kinase substrate motif;G protein-coupled receptor kinase 1 substrate motif;GSK3 kinase substrate motif;GSK-3, ERK1, ERK2, CDK5 substrate motif;MAPKAPK2 kinase substrate motif;WW domain binding motif
0.98764	NaN	1.06092	NaN	NaN	NaN	NaN	NaN	NaN	NaN	3.07224	NaN	NaN	NaN	2.02924	NaN	2.18186	NaN	NaN	NaN	NaN	3.06566	NaN	NaN	NaN	NaN	NaN	NaN	1.96208	1.67407	NaN	NaN	2.97466	2.99355	2.17423	NaN	NaN	NaN	NaN	NaN	NaN	2.10555	2.17423	-0.0686848	0.377483	0.545966	S	2	___1	DNA dependent Protein kinase substrate motif;G protein-coupled receptor kinase 1 substrate motif;PKA kinase substrate motif;PKC kinase substrate motif
3.76031	NaN	NaN	NaN	NaN	NaN	NaN	NaN	NaN	1.61681	4.72045	NaN	NaN	NaN	2.40191	2.88525	3.36114	NaN	NaN	NaN	3.85681	4.01099	4.19324	NaN	NaN	NaN	NaN	NaN	4.70177	2.78709	NaN	NaN	3.23035	NaN	2.45343	6.08375	NaN	NaN	2.74286	NaN	NaN	3.76031	3.00872	0.75159	0.0144497	0.724298	S	3	___1	Casein kinase I substrate motif;ERK1,2 kinase substrate motif;Growth associated histone HI kinase substrate motif;GSK-3, ERK1, ERK2, CDK5 substrate motif;PKA kinase substrate motif;PKC kinase substrate motif;WW domain binding motif
2.23509	2.22918	1.14119	NaN	0.689082	NaN	1.73195	NaN	2.27046	1.50227	NaN	NaN	NaN	NaN	NaN	NaN	3.20095	NaN	NaN	1.18963	NaN	3.27138	NaN	NaN	NaN	2.14363	2.31068	2.56595	NaN	2.15511	NaN	NaN	NaN	2.32274	NaN	3.41342	2.3699	2.25129	2.01341	2.13311	1.28083	2.14363	2.28099	-0.137357	0.313783	0.300015	S	2	___1	Casein kinase I substrate motif;Casein kinase II substrate motif;ERK1,2 kinase substrate motif;Growth associated histone HI kinase substrate motif;GSK-3, ERK1, ERK2, CDK5 substrate motif;PKA kinase substrate motif;PKC kinase substrate motif;WW domain binding motif
2.84384	4.13235	2.1143	2.30583	2.31655	0.868292	1.92495	0.845665	1.38982	3.28285	3.57351	2.36816	2.90677	0.119995	2.20485	3.34139	3.67531	2.31377	NaN	0.607587	-0.978758	5.10012	1.95385	2.85322	NaN	2.09103	NaN	3.95655	4.87287	2.1185	NaN	NaN	4.05939	2.16702	-0.0703403	6.3005	3.89658	2.08607	2.28224	NaN	3.5309	2.3098	3.5309	-1.2211	0.000649355	0.126174	S	3	___1	ERK1,2 kinase substrate motif;Growth associated histone HI kinase substrate motif;GSK-3, ERK1, ERK2, CDK5 substrate motif;PKA kinase substrate motif;PKC kinase substrate motif;WW domain binding motif
NaN	NaN	NaN	0.357964	NaN	NaN	NaN	NaN	1.41419	NaN	NaN	2.58429	NaN	NaN	NaN	0.507439	NaN	NaN	NaN	1.18201	0.563774	2.42537	2.70752	NaN	NaN	NaN	NaN	1.0037	1.51255	1.27979	0.913473	NaN	2.9965	1.26132	NaN	1.23274	1.72285	1.65244	NaN	NaN	NaN	1.2981	1.27979	0.0183097	0.463005	0.921811	S	3	___1	G protein-coupled receptor kinase 1 substrate motif;PKA kinase substrate motif;PKC kinase substrate motif
NaN	2.13139	NaN	NaN	0.315787	1.67466	2.90992	1.94663	2.5574	2.03212	3.39774	2.32063	NaN	1.39676	2.70946	1.58222	2.70457	1.58628	NaN	NaN	1.8751	1.96448	2.4382	0.914058	NaN	4.41211	NaN	2.66287	1.02103	1.66587	1.5869	NaN	2.69664	3.41484	1.99388	3.07818	NaN	NaN	1.4596	2.01749	2.57595	2.03212	2.01749	0.0146322	0.459325	0.879977	T	2	___1	AMP-activated protein kinase substrate motif;PKA kinase substrate motif;PKC kinase substrate motif
1.86382	NaN	0.650369	NaN	NaN	-1.42515	NaN	NaN	1.69343	NaN	2.95861	1.48376	NaN	NaN	2.21601	1.10075	2.92308	0.750744	NaN	0.920154	0.671822	4.23216	NaN	NaN	NaN	NaN	NaN	NaN	3.31482	1.76801	NaN	NaN	3.03684	1.50966	1.9317	NaN	2.14164	1.86558	NaN	2.84541	NaN	1.48376	2.03667	-0.552912	0.0627139	0.11033	T	3	___1	Growth associated histone HI kinase substrate motif;GSK-3, ERK1, ERK2, CDK5 substrate motif;PKA kinase substrate motif;PKC kinase substrate motif;WW domain binding motif
2.19993	2.09662	0.874158	1.82375	1.80388	1.82131	3.14083	0.403691	2.85044	2.08068	4.35456	2.56095	2.67807	-0.730638	3.41322	2.17916	3.05725	1.8059	1.33528	1.19314	2.61494	4.65038	3.39037	NaN	2.70422	2.04812	1.08346	2.10376	3.29111	2.25978	2.36821	0.529222	2.97691	4.06529	2.73956	4.39139	3.42371	2.84759	2.17568	3.60905	2.73892	2.17916	2.73956	-0.560397	0.0604215	0.207819	S	3	___2	Casein kinase II substrate motif;MAPKAPK2 kinase substrate motif;PKA kinase substrate motif;PKC kinase substrate motif
2.19993	1.88203	0.936664	0.616563	0.0502851	1.82131	2.59726	0.19789	2.04312	2.08068	4.20677	2.28621	2.67497	-0.858267	3.37447	2.17916	3.02844	0.566916	1.33528	1.13605	2.2377	4.72824	2.76185	1.13339	2.70422	1.9186	0.991594	0.766113	3.25895	2.25108	2.21533	0.529222	2.8304	3.90549	2.31846	4.27044	3.07726	1.78664	2.11151	3.281	0.544611	2.0619	2.25108	-0.189177	0.269031	0.369141	S	2	___2	Casein kinase II substrate motif
NaN	1.22307	NaN	0.539126	-1.00346	-1.37464	-0.068657	NaN	1.86651	-0.0416172	1.36179	0.850449	NaN	-2.38749	0.915112	NaN	1.82062	-0.47399	NaN	NaN	0.0333057	2.22009	1.02199	NaN	NaN	0.689915	0.899747	1.51708	1.83921	0.681476	-0.654239	NaN	2.60038	0.56616	0.821983	1.37858	1.19214	0.572559	NaN	0.716344	0.24355	0.689915	0.821983	-0.132069	0.318524	0.165461	S	2	___2
1.2154	0.655468	0.850511	0.616563	-1.23378	-1.14532	-0.239041	-1.44243	1.87943	NaN	1.04293	0.944629	NaN	-2.0079	1.12939	1.17098	1.90337	-0.197902	NaN	0.273657	0.0910358	2.31286	0.98787	NaN	2.31762	0.676758	NaN	1.69401	1.86898	0.923858	-0.274338	-1.38417	2.49898	0.699406	0.616168	1.27129	1.42069	0.612616	0.458634	NaN	0.498768	0.763635	0.699406	0.0642289	0.488652	0.423913	S	3	___2	Casein kinase I substrate motif;ERK1,2 kinase substrate motif;Growth associated histone HI kinase substrate motif;GSK-3, ERK1, ERK2, CDK5 substrate motif;MDC1 BRCT domain binding motif;PKA kinase substrate motif;PKC kinase substrate motif;Plk1 PBD domain binding motif;WW domain binding motif
2.302	1.54244	0.891881	2.49729	1.11841	0.919783	2.6549	NaN	3.4115	1.02965	4.65959	3.13437	2.78225	-1.52206	3.01724	2.06298	2.69484	2.13638	NaN	1.51795	0.962992	5.49536	2.77012	-1.46929	3.31738	1.62938	NaN	2.62042	2.16522	2.38391	2.13966	NaN	2.79548	3.99374	3.39655	3.16779	3.24078	2.06022	1.31548	1.99897	2.03464	2.21919	2.38391	-0.164723	0.289748	0.201383	S	2	___2	Casein kinase II substrate motif;ERK1,2 kinase substrate motif;G protein-coupled receptor kinase 1 substrate motif;GSK3 kinase substrate motif;GSK-3, ERK1, ERK2, CDK5 substrate motif;WW domain binding motif
3.00174	NaN	NaN	NaN	NaN	NaN	1.50717	NaN	-0.370354	1.94385	3.75443	3.43167	NaN	NaN	2.18116	1.92671	2.84775	NaN	NaN	2.01642	0.962992	NaN	NaN	NaN	NaN	NaN	NaN	3.54152	2.16522	0.1229	NaN	NaN	3.04421	2.49091	NaN	NaN	3.26207	0.81821	NaN	NaN	2.96043	2.01642	2.72567	-0.709254	0.0270289	0.736453	S	2	___2	Casein kinase II substrate motif;G protein-coupled receptor kinase 1 substrate motif;GSK3 kinase substrate motif;MAPKAPK2 kinase substrate motif
2.50785	1.54244	0.891881	2.49729	1.7777	0.919783	2.6549	NaN	3.51656	0.83552	4.65959	3.21253	2.78225	-1.52206	3.06325	2.39178	2.69484	1.38382	NaN	1.57723	1.73167	4.74977	2.77012	-1.46929	3.31738	1.62938	NaN	3.23492	3.51503	2.38391	1.46268	NaN	2.9542	3.99374	3.13175	4.68344	3.35604	2.03229	1.31548	3.14928	2.66882	2.44453	3.13175	-0.687214	0.0306841	0.0503228	S	2	___2	Casein kinase II substrate motif;MAPKAPK2 kinase substrate motif;Pyruvate dehydrogenase kinase substrate motif
NaN	NaN	0.353978	NaN	2.00601	NaN	4.2587	NaN	2.98373	NaN	5.77242	1.53815	NaN	-0.123174	3.15033	1.57684	0.775533	NaN	NaN	1.61943	NaN	4.73121	4.07566	NaN	NaN	NaN	NaN	NaN	2.76702	1.86396	NaN	NaN	3.58993	2.77445	2.64856	4.51579	NaN	2.05035	NaN	NaN	1.416	2.00601	2.70779	-0.701773	0.0282266	0.763771	S	2	___2	BARD1 BRCT domain binding motif;Casein kinase II substrate motif;G protein-coupled receptor kinase 1 substrate motif
NaN	NaN	0.353978	NaN	2.00601	NaN	4.45961	NaN	2.98373	NaN	5.77242	1.53815	NaN	-0.123174	3.15033	1.25362	3.22022	NaN	NaN	1.42959	NaN	4.79197	2.78319	NaN	NaN	NaN	NaN	NaN	2.76702	2.05858	NaN	NaN	3.91952	2.77445	2.64856	4.51579	NaN	2.05035	NaN	NaN	1.416	2.78319	2.70779	0.0754076	0.474676	0.76478	S	2	___2	Casein kinase II substrate motif;PKA kinase substrate motif;PKC kinase substrate motif
2.1908	2.1991	1.18356	1.3307	-0.219871	0.678519	1.13824	-1.4115	1.273	1.78534	2.3438	1.44781	NaN	-1.22516	2.21172	2.21168	3.22612	NaN	1.46797	1.02487	1.59301	3.12599	2.38766	0.722808	1.44308	1.84787	NaN	1.7219	3.29046	2.34444	1.28589	0.0430231	3.55466	2.3662	1.55805	3.21525	2.776	2.57676	2.23403	2.20602	1.33264	1.45789	2.28923	-0.831347	0.0127397	0.0328342	S	2	___2	14-3-3 domain binding motif;Calmodulin-dependent protein kinase II substrate motif;Casein kinase II substrate motif;G protein-coupled receptor kinase 1 substrate motif;GSK3 kinase substrate motif;MAPKAPK1 kinase substrate motif;PKA kinase substrate motif;PKC kinase substrate motif
2.1908	2.1991	1.18356	1.3307	-0.219871	0.678519	1.13824	-1.4115	3.023	1.78534	2.3438	1.44781	NaN	-1.22516	2.19537	2.21168	3.19853	2.85914	1.46797	1.02487	1.59301	3.15571	2.41992	0.722808	NaN	1.84787	NaN	1.7219	3.29046	2.34444	1.28589	0.0430231	3.51512	2.3662	1.55805	3.21525	2.81119	2.57676	2.23403	2.20602	1.33264	1.68918	2.28923	-0.600057	0.0493498	0.0830374	S	2	___2	14-3-3 domain binding motif;Akt kinase substrate motif;Calmodulin-dependent protein kinase II substrate motif;Casein kinase II substrate motif;MAPKAPK1 kinase substrate motif;PKA kinase substrate motif;PKC kinase substrate motif;Pyruvate dehydrogenase kinase substrate motif
2.47005	2.29325	1.01927	0.959181	0.661514	0.186706	1.63057	0.0792577	-0.00931519	1.20855	3.76437	2.16067	NaN	-0.691694	2.2847	2.78114	2.92585	2.14866	NaN	1.26062	0.258254	4.75754	1.22768	NaN	3.1158	2.03349	NaN	2.82788	4.03028	2.52821	0.78259	-0.176537	3.11992	2.28745	2.61557	4.28676	3.02288	2.35734	2.18812	3.30422	2.6965	1.63057	2.65604	-1.02547	0.00323203	0.0397797	S	2	___2	14-3-3 domain binding motif;Calmodulin-dependent protein kinase II substrate motif;Calmodulin-dependent protein kinase IV substrate motif;Casein kinase II substrate motif;Chk1 kinase substrate motif;DNA dependent Protein kinase substrate motif;G protein-coupled receptor kinase 1 substrate motif;PKA kinase substrate motif;PKC kinase substrate motif
NaN	2.95499	1.22799	1.9288	0.42851	0.635744	1.16818	NaN	NaN	NaN	2.52239	NaN	NaN	NaN	0.0888154	0.196579	2.43866	0.345402	NaN	1.32284	-0.561047	3.16224	-0.309974	NaN	NaN	0.378926	2.55975	0.971357	4.50103	2.73442	-0.943501	-0.0450243	1.68743	2.4785	2.38568	3.38228	1.07362	NaN	1.46814	2.70254	0.117974	0.901962	2.03655	-1.13459	0.00135765	0.182929	S	3	___2	G protein-coupled receptor kinase 1 substrate motif;GSK3 kinase substrate motif
2.79723	2.43035	1.12363	1.44402	0.545009	0.186706	1.16818	0.0792577	1.2628	0.925641	3.14338	2.06162	NaN	-0.691694	1.9736	0.196579	2.88964	1.24704	NaN	1.19838	-0.176592	3.8564	1.22768	NaN	3.1158	2.03349	2.55975	1.89962	3.73439	2.63132	2.67406	-0.110811	1.68743	2.11342	2.50065	3.87672	2.58216	2.28449	1.82813	3.00337	1.17227	1.24704	2.50065	-1.25361	0.000486547	0.0271567	S	2	___2	Casein kinase II substrate motif;ERK1,2 kinase substrate motif;G protein-coupled receptor kinase 1 substrate motif;GSK3 kinase substrate motif;GSK-3, ERK1, ERK2, CDK5 substrate motif;MAPKAPK2 kinase substrate motif;WW domain binding motif
3.02997	NaN	NaN	NaN	NaN	2.51486	4.52435	NaN	4.67333	2.62659	5.10191	3.62163	NaN	NaN	4.18694	2.5696	3.18595	2.85914	NaN	NaN	3.06617	4.57919	NaN	NaN	NaN	NaN	NaN	3.64899	3.15602	2.01096	3.06751	NaN	NaN	4.41812	3.55187	NaN	3.56513	NaN	NaN	NaN	NaN	3.18595	3.55187	-0.365912	0.144315	0.542377	T	3	___2	ERK1,2 kinase substrate motif;G protein-coupled receptor kinase 1 substrate motif;GSK3, Erk1, Erk2 and CDK5 kinase motif;GSK-3, ERK1, ERK2, CDK5 substrate motif;MAPKAPK2 kinase substrate motif;MDC1 BRCT domain binding motif;Plk1 PBD domain binding motif;WW domain binding motif
2.09915	1.3244	-0.288638	1.66427	0.657403	-0.419194	1.32539	-1.60496	3.01177	0.746437	2.85696	2.39205	NaN	NaN	1.63717	2.00142	2.24199	1.50005	NaN	1.26587	1.39651	3.60987	1.19075	NaN	NaN	0.677037	NaN	1.07513	2.72352	1.79221	0.242105	NaN	2.53742	1.80588	1.70766	2.65054	2.17789	0.928386	3.03404	0.97192	0.984207	1.39651	1.79221	-0.395707	0.127933	0.336124	S	3	___3	Casein kinase II substrate motif;MAPKAPK2 kinase substrate motif;PKA kinase substrate motif;PKC kinase substrate motif
2.09915	1.3244	-0.288638	1.66427	-0.44412	-0.419194	1.44109	-1.60496	3.01177	0.794995	2.85696	2.22387	NaN	NaN	1.63717	2.1474	2.17085	0.932733	NaN	1.19727	1.11134	3.63887	0.85371	NaN	NaN	0.820998	NaN	0.754585	2.56372	1.75636	0.242105	NaN	2.53742	2.08859	2.28339	2.65054	2.17789	1.27043	3.03404	2.18655	0.984207	1.3244	2.17789	-0.853489	0.0110148	0.10911	S	2	___3	Casein kinase II substrate motif
1.96326	NaN	NaN	NaN	NaN	NaN	NaN	NaN	3.01177	0.843569	3.06539	1.68548	NaN	NaN	1.63717	1.82516	2.23552	NaN	NaN	1.20622	1.68164	3.2914	NaN	NaN	NaN	0.820998	NaN	1.5132	2.86675	1.72053	NaN	NaN	-0.389057	NaN	1.12005	NaN	2.14605	NaN	NaN	NaN	NaN	1.75532	1.61687	0.138453	0.396928	0.409694	S	2	___3
0.522803	1.3244	-0.288638	1.25176	-0.44412	-0.419194	1.32539	-1.60496	2.29664	0.746437	2.52221	2.1562	NaN	NaN	1.75871	2.1474	1.66619	0.843008	NaN	1.05499	0.935621	3.60987	-0.0507124	NaN	NaN	0.350684	NaN	0.196011	1.92695	1.80281	0.242105	NaN	2.12951	1.81985	2.30733	2.58818	2.20976	1.27043	NaN	0.97192	0.984207	1.05499	1.81133	-0.75634	0.0204258	0.159767	S	3	___3	Casein kinase I substrate motif;ERK1,2 kinase substrate motif;Growth associated histone HI kinase substrate motif;GSK-3, ERK1, ERK2, CDK5 substrate motif;MDC1 BRCT domain binding motif;PKA kinase substrate motif;PKC kinase substrate motif;Plk1 PBD domain binding motif;WW domain binding motif
NaN	NaN	NaN	2.07683	1.97819	NaN	NaN	NaN	NaN	2.6317	4.33685	2.73968	NaN	NaN	1.51345	3.22299	3.39758	2.24679	NaN	1.49521	3.44768	4.93958	0.625638	NaN	NaN	3.22543	NaN	NaN	3.18836	2.29333	NaN	NaN	4.10818	4.23952	3.27267	NaN	2.64567	2.84822	3.03404	3.40124	NaN	2.68569	3.18836	-0.50267	0.0798963	0.181309	S	3	___3	Casein kinase I substrate motif;G protein-coupled receptor kinase 1 substrate motif;GSK3 kinase substrate motif;PKA kinase substrate motif;PKC kinase substrate motif
2.99444	NaN	NaN	2.07683	1.97819	NaN	NaN	NaN	NaN	2.6317	4.33685	2.73968	NaN	NaN	1.51345	3.22299	2.63981	2.24679	NaN	1.49521	3.44768	4.93958	0.625638	NaN	NaN	3.22543	NaN	NaN	3.18836	2.96205	NaN	NaN	4.10818	4.11445	3.27267	4.92615	2.64567	2.95022	3.03404	3.40124	NaN	2.63981	3.23052	-0.590703	0.0518029	0.040685	S	3	___3	Casein kinase II substrate motif;MDC1 BRCT domain binding motif;PKA kinase substrate motif;PKC kinase substrate motif;Plk1 PBD domain binding motif
3.65255	2.41715	2.619	2.34604	NaN	NaN	NaN	NaN	2.5892	NaN	3.24949	3.63312	2.84471	NaN	NaN	2.49639	2.93252	2.11861	NaN	1.99818	1.50197	4.24855	3.10032	NaN	NaN	3.25885	NaN	2.50371	2.32859	2.04432	1.8767	NaN	2.34317	3.71599	3.95941	3.95692	3.39284	2.0094	NaN	3.20357	2.80375	2.73185	2.65373	0.078122	0.471287	0.911335	S	2	___3	Casein kinase II substrate motif;ERK1,2 kinase substrate motif;G protein-coupled receptor kinase 1 substrate motif;GSK3 kinase substrate motif;GSK-3, ERK1, ERK2, CDK5 substrate motif;WW domain binding motif
3.65255	2.41715	2.619	2.34604	NaN	NaN	NaN	NaN	2.5892	NaN	3.24949	3.63312	2.84471	NaN	2.44841	2.49639	2.93252	2.40306	NaN	1.99818	1.50197	4.24855	2.3769	NaN	NaN	3.25885	NaN	2.50371	2.32859	2.04432	1.8767	NaN	2.34317	3.71599	3.95941	5.00432	3.36714	2.0094	NaN	3.20357	2.80375	2.5892	2.65373	-0.064532	0.381466	0.612122	S	2	___3	Casein kinase II substrate motif;G protein-coupled receptor kinase 1 substrate motif;GSK3 kinase substrate motif;MAPKAPK2 kinase substrate motif
3.06483	2.41715	2.619	2.34604	NaN	NaN	NaN	NaN	1.92342	NaN	2.394	3.1093	2.84471	NaN	NaN	2.12457	2.93252	1.83413	NaN	1.99818	2.19369	3.43299	1.65353	NaN	NaN	3.25885	NaN	2.50371	2.32859	1.43031	1.8767	NaN	2.34317	2.65047	3.95941	5.00432	3.36714	1.27209	NaN	NaN	2.80375	2.40558	2.50371	-0.0981395	0.349628	0.6297	S	2	___3	Casein kinase II substrate motif;MAPKAPK2 kinase substrate motif;Pyruvate dehydrogenase kinase substrate motif
2.01554	NaN	NaN	NaN	NaN	NaN	NaN	NaN	NaN	1.73063	2.39248	NaN	NaN	NaN	NaN	2.12663	3.01611	NaN	NaN	NaN	NaN	2.04185	NaN	NaN	NaN	NaN	NaN	NaN	2.25225	1.9809	NaN	NaN	1.46875	NaN	NaN	3.50964	1.70889	NaN	NaN	NaN	NaN	2.08424	1.9809	0.10334	0.439928	0.930315	S	2	___3	Casein kinase II substrate motif;ERK1,2 kinase substrate motif;G protein-coupled receptor kinase 1 substrate motif;GSK3 kinase substrate motif;GSK-3, ERK1, ERK2, CDK5 substrate motif;MAPKAPK2 kinase substrate motif;WW domain binding motif
2.05668	0.555373	NaN	NaN	NaN	3.47168	1.12502	0.197406	1.04826	1.69194	-0.514723	NaN	NaN	-0.713028	2.84619	1.79421	0.738333	NaN	1.51136	0.15461	1.3571	1.28261	NaN	NaN	NaN	1.63017	NaN	NaN	1.95738	2.38356	0.146924	NaN	1.76944	0.254304	NaN	NaN	2.53159	2.86363	2.26384	NaN	0.783507	1.28261	1.95738	-0.674764	0.0329239	0.286327	S	2	___1	Casein kinase II substrate motif;MDC1 BRCT domain binding motif;PKA kinase substrate motif;PKC kinase substrate motif;Plk1 PBD domain binding motif;Pyruvate dehydrogenase kinase substrate motif
NaN	NaN	NaN	0.745177	NaN	NaN	1.60707	NaN	0.758902	0.280321	1.10621	NaN	NaN	1.6693	0.41716	0.236739	0.387177	NaN	NaN	NaN	0.812343	NaN	1.76634	NaN	NaN	NaN	NaN	NaN	NaN	NaN	0.553594	NaN	NaN	0.0259146	0.818384	NaN	0.5612	-0.216599	NaN	NaN	0.850539	0.758902	0.557397	0.201505	0.323076	0.0866231	S	2	___1	14-3-3 domain binding motif;Calmodulin-dependent protein kinase II substrate motif;Casein kinase II substrate motif;PKA kinase substrate motif;PKC kinase substrate motif;Pyruvate dehydrogenase kinase substrate motif
1.29618	NaN	NaN	NaN	1.70297	1.15676	1.72471	2.26308	0.134022	1.9182	NaN	NaN	NaN	NaN	0.102781	NaN	-0.139722	NaN	NaN	NaN	0.370367	0.228696	0.522416	NaN	NaN	NaN	NaN	NaN	NaN	1.43953	1.68417	NaN	-0.0666314	NaN	1.38207	NaN	0.136168	0.584301	1.79806	NaN	NaN	0.839589	1.38207	-0.542477	0.0660226	0.887913	S	2	___1	Casein kinase II substrate motif;MAPKAPK2 kinase substrate motif;PKA kinase substrate motif;PKC kinase substrate motif
0.92476	NaN	NaN	1.74847	2.05139	0.0828771	NaN	1.65429	1.13199	NaN	1.04462	NaN	NaN	0.0171313	1.3455	NaN	0.457894	0.386882	NaN	NaN	0.618398	1.43392	0.889899	NaN	NaN	NaN	NaN	NaN	0.765896	0.745977	0.627755	NaN	1.25086	0.984994	NaN	0.786526	NaN	0.909109	NaN	NaN	NaN	0.984691	0.786526	0.198165	0.326847	0.530741	S	3	___1	Casein kinase I substrate motif;Casein kinase II substrate motif;ERK1,2 kinase substrate motif;GSK-3, ERK1, ERK2, CDK5 substrate motif;PKA kinase substrate motif;PKC kinase substrate motif;WW domain binding motif
1.13343	NaN	NaN	NaN	2.69164	1.16798	NaN	2.07939	NaN	NaN	1.88933	-0.0660493	0.678421	0.0995478	1.01236	NaN	0.482458	0.796783	NaN	1.18028	0.130474	NaN	NaN	NaN	NaN	NaN	NaN	NaN	NaN	1.09411	0.985094	NaN	-0.413862	1.31821	NaN	1.84736	1.44183	0.92668	1.37445	NaN	NaN	1.01236	1.20616	-0.193798	0.265201	0.879189	S	3	___2	b-Adrenergic Receptor kinase substrate motif;ERK1,2 kinase substrate motif;GSK-3, ERK1, ERK2, CDK5 substrate motif;PKA kinase substrate motif;PKC kinase substrate motif;WW domain binding motif
1.13343	NaN	NaN	NaN	2.69164	1.16798	NaN	2.07939	NaN	NaN	1.88933	-0.0660493	0.678421	0.0995478	1.01236	NaN	0.482458	0.796783	NaN	1.18028	0.130474	NaN	NaN	NaN	NaN	NaN	NaN	NaN	NaN	1.09411	0.985094	NaN	-0.413862	1.31821	NaN	1.84736	1.44183	0.92668	1.37445	NaN	NaN	1.01236	1.20616	-0.193798	0.265201	0.879189	S	3	___2	b-Adrenergic Receptor kinase substrate motif;ERK1,2 kinase substrate motif;Growth associated histone HI kinase substrate motif;GSK-3, ERK1, ERK2, CDK5 substrate motif;PKA kinase substrate motif;PKC kinase substrate motif;WW domain binding motif
NaN	NaN	NaN	NaN	NaN	NaN	-0.717136	NaN	NaN	NaN	-1.87134	0.0815239	NaN	NaN	NaN	1.11376	-1.82622	NaN	NaN	-0.570191	-2.57172	0.722251	NaN	0.291513	NaN	NaN	NaN	NaN	-0.462182	-1.43984	NaN	NaN	NaN	-1.14572	0.555836	NaN	NaN	-0.618444	NaN	NaN	NaN	-0.570191	-0.618444	0.0482529	0.493056	0.960094	S	2	___2	Casein kinase II substrate motif;G protein-coupled receptor kinase 1 substrate motif
NaN	NaN	NaN	NaN	NaN	NaN	-0.717136	NaN	NaN	NaN	-1.87134	0.0815239	NaN	NaN	NaN	1.11376	-1.82622	NaN	NaN	-0.570191	-2.57172	0.722251	NaN	0.291513	NaN	NaN	NaN	NaN	-0.462182	-1.43984	NaN	NaN	NaN	-1.14572	0.555836	NaN	NaN	-0.618444	NaN	NaN	NaN	-0.570191	-0.618444	0.0482529	0.493056	0.960094	S	2	___2	14-3-3 domain binding motif;Calmodulin-dependent protein kinase II substrate motif;Casein kinase II substrate motif;ERK1,2 kinase substrate motif;GSK-3, ERK1, ERK2, CDK5 substrate motif;PKA kinase substrate motif;PKC kinase substrate motif;WW domain binding motif
0.671734	0.450171	0.832797	1.29879	1.17841	0.712888	NaN	NaN	0.87582	NaN	NaN	1.38229	NaN	NaN	NaN	NaN	NaN	0.738279	NaN	0.607205	NaN	1.74075	NaN	NaN	NaN	NaN	NaN	0.525363	0.986322	0.878608	NaN	0.269119	NaN	1.56994	0.513664	NaN	0.5934	NaN	NaN	NaN	NaN	0.832797	0.5934	0.239397	0.281635	0.360252	S	3	___2	Calmodulin-dependent protein kinase II substrate motif;Casein kinase II substrate motif;Chk1 kinase substrate motif;DNA dependent Protein kinase substrate motif;PKA kinase substrate motif;PKC kinase substrate motif
0.671734	0.450171	0.832797	1.29879	1.17841	0.712888	NaN	NaN	0.87582	NaN	NaN	1.38229	NaN	NaN	NaN	NaN	NaN	0.738279	NaN	0.607205	NaN	1.74075	NaN	NaN	NaN	NaN	NaN	0.525363	0.986322	0.878608	NaN	0.269119	NaN	1.56994	0.513664	NaN	0.5934	NaN	NaN	NaN	NaN	0.832797	0.5934	0.239397	0.281635	0.360252	S	3	___2	b-Adrenergic Receptor kinase substrate motif;Casein kinase II substrate motif;Pyruvate dehydrogenase kinase substrate motif
NaN	NaN	1.77701	1.86857	2.84331	3.88459	3.87417	NaN	NaN	NaN	3.51072	-1.50254	NaN	NaN	NaN	NaN	2.51353	2.61676	NaN	NaN	3.64458	0.0822385	3.23837	NaN	NaN	NaN	NaN	NaN	3.27756	2.89051	-3.08755	NaN	4.58335	4.13029	2.23984	-0.726156	3.86908	2.74413	NaN	NaN	2.69463	2.73004	2.81732	-0.0872859	0.359807	0.910815	S	2	___1	Casein kinase II substrate motif
0.368937	1.22467	0.640101	0.535042	NaN	1.7725	2.53342	-0.313498	0.594438	2.4755	0.350745	1.34862	NaN	1.14282	0.688258	0.346013	0.424325	0.439553	NaN	1.79484	1.33961	1.35406	1.53721	1.71567	NaN	0.915461	NaN	1.12378	1.68774	1.73875	0.179444	0.584918	-0.937542	3.42607	1.93292	0.992345	0.735184	2.51344	2.75279	1.4847	1.31409	1.02914	1.39939	-0.370253	0.141845	0.322779	S	2	___1	14-3-3 domain binding motif;Calmodulin-dependent protein kinase II substrate motif;PAK2 kinase substrate motif;PKA kinase substrate motif;PKC epsilon kinase substrate motif;PKC kinase substrate motif
NaN	1.45553	NaN	NaN	NaN	1.5633	1.56226	NaN	NaN	1.61768	NaN	1.45817	NaN	NaN	NaN	1.87355	NaN	NaN	NaN	NaN	NaN	4.06411	-0.44087	NaN	NaN	NaN	NaN	NaN	1.88164	NaN	NaN	NaN	NaN	1.93309	NaN	2.57614	1.27957	0.972955	1.89633	2.70479	1.34914	1.56278	1.88898	-0.326203	0.168261	0.715751	S	2	___1	Cdc2 kinase substrate motif;CDK kinase substrate motif;CDK1,2,4,6 kinase substrate motif;ERK1,2 kinase substrate motif;Growth associated histone HI kinase substrate motif;GSK-3, ERK1, ERK2, CDK5 substrate motif;PKA kinase substrate motif;PKC kinase substrate motif;WW domain binding motif
2.73398	2.84048	1.14038	1.84912	1.91771	3.61862	4.48726	2.35607	2.27916	2.7912	3.68301	2.21662	2.0946	1.33756	3.44215	3.04608	2.88592	1.56081	3.1099	2.29108	3.74578	4.26624	3.69339	2.40915	NaN	2.08609	NaN	2.03236	3.3804	3.05322	2.84967	1.61515	2.93575	4.08273	3.10699	4.93754	3.31678	3.10363	2.70943	3.19327	3.27474	2.73398	3.10531	-0.371334	0.141234	0.158686	S	2	___1	14-3-3 domain binding motif;Calmodulin-dependent protein kinase II substrate motif;Cdc2 kinase substrate motif;CDK kinase substrate motif;CDK1,2,4,6 kinase substrate motif;CLK1 kinase substrate motif;ERK1,2 kinase substrate motif;GSK-3, ERK1, ERK2, CDK5 substrate motif;PKA kinase substrate motif;PKC kinase substrate motif;WW domain binding motif
3.47087	4.0707	2.262	2.38967	1.2663	2.87157	3.91786	2.04917	1.83898	NaN	3.77023	2.84052	NaN	1.58926	3.58217	3.68979	2.98853	2.23768	2.21108	2.5667	4.06236	4.1589	3.4794	NaN	NaN	3.04908	NaN	2.30966	3.14922	3.16465	3.37622	1.96333	3.00318	4.31866	3.52897	5.48307	2.89272	2.95428	2.81321	3.02055	3.34682	2.93005	3.08489	-0.154842	0.298326	0.294671	S	3	___1	14-3-3 domain binding motif;Calmodulin-dependent protein kinase II substrate motif;Calmodulin-dependent protein kinase IV substrate motif;Casein kinase II substrate motif;Chk1 kinase substrate motif;G protein-coupled receptor kinase 1 substrate motif;GSK3 kinase substrate motif;PKA kinase substrate motif;PKC kinase substrate motif
3.02496	NaN	NaN	NaN	NaN	NaN	5.24747	NaN	NaN	2.72722	3.88027	3.18097	NaN	NaN	3.51242	2.41557	1.44795	NaN	NaN	2.37212	2.66525	NaN	NaN	NaN	NaN	NaN	NaN	NaN	2.48243	3.5786	NaN	NaN	NaN	3.8463	NaN	NaN	3.41949	2.44501	2.70397	NaN	NaN	2.87609	3.06173	-0.185646	0.271976	0.938837	S	2	___2	Casein kinase II substrate motif
3.02496	NaN	NaN	NaN	NaN	NaN	1.09098	NaN	NaN	2.72722	3.88027	3.18097	NaN	NaN	3.51242	2.41557	1.44795	NaN	NaN	2.37212	2.66525	NaN	NaN	NaN	NaN	NaN	NaN	NaN	2.48243	3.5786	NaN	NaN	NaN	3.8463	NaN	NaN	3.41949	2.44501	2.70397	NaN	NaN	2.69623	3.06173	-0.365498	0.144553	0.245961	S	2	___2	b-Adrenergic Receptor kinase substrate motif
2.96026	NaN	NaN	NaN	NaN	4.0029	1.71366	1.25452	2.16453	2.3223	3.57809	NaN	NaN	NaN	3.07729	3.71828	0.787328	NaN	NaN	2.04587	2.88307	NaN	2.81921	NaN	NaN	NaN	NaN	NaN	2.38486	2.97701	NaN	NaN	3.16258	3.12109	3.22902	NaN	2.42231	1.58655	2.12891	NaN	3.44086	2.81921	2.97701	-0.157795	0.29575	0.65358	S	2	___2	14-3-3 domain binding motif;b-Adrenergic Receptor kinase substrate motif;Calmodulin-dependent protein kinase II substrate motif;Casein kinase II substrate motif;Phosphorylase kinase substrate motif;PKA kinase substrate motif;PKC kinase substrate motif
2.06753	NaN	NaN	NaN	NaN	2.64108	NaN	2.11706	1.72934	2.3223	3.57809	NaN	NaN	NaN	2.23083	3.71828	1.04581	NaN	NaN	2.04587	2.77534	2.78566	2.46217	NaN	NaN	NaN	NaN	NaN	2.07879	2.36035	NaN	NaN	3.16258	2.38958	2.25296	NaN	1.83845	1.46935	1.86045	NaN	3.44086	2.3223	2.25296	0.0693433	0.482255	0.71417	S	2	___2	Casein kinase II substrate motif
1.17489	NaN	NaN	NaN	NaN	1.27924	1.71366	2.97961	1.29418	NaN	NaN	NaN	NaN	NaN	1.38435	NaN	1.30425	NaN	NaN	NaN	2.66763	2.78566	2.06112	NaN	NaN	NaN	NaN	NaN	1.77277	1.92045	NaN	NaN	NaN	1.65804	1.27695	NaN	1.25457	1.46935	1.59201	NaN	NaN	1.549	1.59201	-0.0430023	0.402308	0.237644	S	2	___2	Casein kinase II substrate motif;G protein-coupled receptor kinase 1 substrate motif;Pyruvate dehydrogenase kinase substrate motif
-0.0924741	-0.0245299	-0.423617	-0.207972	0.3693	-0.0372507	0.114798	-0.384921	0.139924	-0.42708	0.146085	-0.524115	-0.00313675	-0.00100788	0.0611249	-0.276014	-0.803795	0.437971	0.358451	-0.111663	0.230162	0.326155	0.338252	-0.246599	NaN	-0.372336	-0.481689	0.291143	0.175522	-0.254175	-0.077544	-0.106334	-1.51463	-0.110927	0.10066	0.38622	-0.279973	-0.191013	-0.597216	0.108995	-0.119097	-0.0245299	-0.110927	0.0863969	0.460968	0.375402	S	2	___1	Casein kinase I substrate motif;Casein kinase II substrate motif;Cdc2 kinase substrate motif;CDK kinase substrate motif;CDK1,2,4,6 kinase substrate motif;ERK1,2 kinase substrate motif;GSK-3, ERK1, ERK2, CDK5 substrate motif;WW domain binding motif
-0.704664	-0.14915	NaN	-0.297493	0.309584	-0.471278	0.0664627	-0.59018	-0.918351	-0.615814	-0.578794	-1.04019	-0.418712	0.103719	-0.422473	-0.379569	-0.880517	-0.305658	-0.402349	-0.665265	-0.404029	-0.361409	-0.563179	-0.326005	NaN	-0.592547	NaN	-0.922677	-0.469326	-0.460985	-0.116033	-0.877118	-0.220166	-0.609916	-0.383547	-0.412057	-0.606731	-0.758633	-0.514925	NaN	-0.487629	-0.420592	-0.487629	0.0670362	0.48514	0.36304	S	2	___1	Casein kinase I substrate motif;Casein kinase II substrate motif
2.25571	2.02731	NaN	NaN	1.79085	NaN	NaN	0.863152	0.59902	1.57311	1.84767	1.72396	NaN	0.6682	1.82128	1.92862	2.01869	1.33183	NaN	1.37003	-0.148326	1.24109	NaN	NaN	NaN	NaN	0.937098	2.11849	NaN	1.22429	NaN	NaN	1.69873	1.19439	NaN	NaN	2.0361	0.972154	NaN	2.02816	NaN	1.64853	1.46151	0.18702	0.339556	0.699407	S	2	___2	Casein kinase II substrate motif;G protein-coupled receptor kinase 1 substrate motif
2.25571	2.02731	NaN	NaN	1.79085	NaN	NaN	0.863152	0.59902	1.57311	1.84767	1.72396	NaN	0.6682	1.82128	1.92862	2.01869	1.33183	NaN	1.37003	-0.148326	1.24109	NaN	NaN	NaN	NaN	0.937098	2.11849	NaN	1.22429	NaN	NaN	1.69873	1.19439	NaN	NaN	2.0361	0.972154	NaN	2.02816	NaN	1.64853	1.46151	0.18702	0.339556	0.699407	S	2	___2	14-3-3 domain binding motif;Calmodulin-dependent protein kinase I substrate motif;Calmodulin-dependent protein kinase II alpha substrate motif;Calmodulin-dependent protein kinase II substrate motif;Calmodulin-dependent protein kinase IV substrate motif;Casein kinase II substrate motif;Chk1 kinase substrate motif;Phosphorylase kinase substrate motif;PKA kinase substrate motif;PKC kinase substrate …
NaN	NaN	NaN	1.68382	NaN	1.26683	NaN	NaN	2.64882	NaN	NaN	NaN	NaN	NaN	2.58091	-1.09314	1.29083	NaN	NaN	NaN	NaN	NaN	NaN	NaN	NaN	NaN	NaN	NaN	NaN	0.965641	1.08438	NaN	-2.91409	NaN	NaN	NaN	2.2705	2.19	NaN	NaN	NaN	1.48733	1.08438	0.402947	0.137618	0.55844	S	2	___1	Casein kinase II substrate motif;G protein-coupled receptor kinase 1 substrate motif
NaN	NaN	NaN	NaN	NaN	-0.318937	NaN	NaN	-0.821614	NaN	NaN	NaN	NaN	NaN	0.489045	NaN	0.525884	-0.324368	NaN	-0.624458	-0.917564	-0.528245	NaN	-0.347012	NaN	NaN	NaN	NaN	-0.368357	NaN	-0.396374	NaN	0.285971	-0.35105	NaN	NaN	0.122679	0.202303	0.375962	NaN	-0.0538279	-0.347012	0.0344254	-0.381437	0.135611	0.170814	S	2	___1	G protein-coupled receptor kinase 1 substrate motif;GSK3 kinase substrate motif
0.366793	-0.208178	-0.0689173	-0.327012	NaN	NaN	-0.897566	-0.215724	NaN	0.386645	NaN	NaN	NaN	-1.51159	NaN	-0.220756	0.780492	NaN	NaN	0.092319	-0.644533	-0.545493	NaN	NaN	NaN	0.340496	NaN	-0.742938	NaN	0.163086	-0.0974861	-1.36016	0.727626	-0.0109903	NaN	-0.338106	0.381318	0.287875	0.473703	0.370167	NaN	-0.211951	0.163086	-0.375037	0.139155	0.470296	T	2	___1	Akt kinase substrate motif;Calmodulin-dependent protein kinase II substrate motif;PKC kinase substrate motif
0.380956	NaN	NaN	0.170472	-0.270696	-0.0347046	0.250777	0.184658	-0.119136	0.210136	-0.847518	-0.699294	NaN	-0.697487	0.490559	-0.351902	0.498153	-0.823874	NaN	-0.77123	-0.482765	-0.502498	-1.11249	NaN	NaN	0.472112	NaN	-0.885775	0.00112475	0.324832	-0.369027	0.534437	0.364898	0.159248	-0.848712	-0.36438	0.261274	0.611145	0.319378	NaN	0.153287	-0.194916	0.159248	-0.354164	0.151148	0.223037	S	3	___2	Casein kinase II substrate motif;DNA dependent Protein kinase substrate motif;ERK1,2 kinase substrate motif;G protein-coupled receptor kinase 1 substrate motif;GSK3 kinase substrate motif;GSK-3, ERK1, ERK2, CDK5 substrate motif;WW domain binding motif
0.303885	NaN	NaN	0.38697	-0.270696	-0.0239042	0.250777	0.252888	-0.119136	0.210136	-0.847518	-0.61338	NaN	-0.7154	0.490559	-0.351902	0.452334	-0.823874	NaN	-0.77123	-0.528065	-0.502498	-0.664527	NaN	NaN	NaN	NaN	-0.885775	-0.119243	0.405375	-0.369027	0.67971	0.362514	0.277861	-0.848712	-0.440636	0.293596	0.572397	0.319378	NaN	0.109704	-0.270696	0.277861	-0.548557	0.0640788	0.210941	S	3	___2	Cdc2 kinase substrate motif;CDK kinase substrate motif;CDK1,2,4,6 kinase substrate motif;DNA dependent Protein kinase substrate motif;ERK1,2 kinase substrate motif;G protein-coupled receptor kinase 1 substrate motif;GSK-3, ERK1, ERK2, CDK5 substrate motif;MAPKAPK2 kinase substrate motif;WW domain binding motif
1.06756	NaN	1.22609	1.33802	NaN	1.85663	0.222223	NaN	NaN	1.22951	-0.519974	0.498179	NaN	-0.32379	1.24042	0.840428	0.552346	-0.296519	NaN	0.83742	0.796046	0.296604	NaN	2.06956	NaN	NaN	NaN	NaN	0.298598	1.05554	0.97389	NaN	0.86046	1.26023	-0.368098	0.9491	NaN	1.14776	1.0874	NaN	0.739472	0.83742	0.961495	-0.124076	0.325747	0.867198	S	3	___1
-0.612112	-1.20101	-0.0678175	-0.881097	-0.283578	-0.493905	-1.27439	-0.68246	-0.747466	0.00265957	-0.525322	NaN	-1.18366	-0.465729	-0.870686	-1.3792	-0.412554	-1.46897	-0.739533	-2.06247	-0.429906	-0.550427	0.252351	NaN	NaN	-0.490976	-1.02642	-0.333136	-1.34035	-1.36607	-0.14146	0.0577151	-0.887286	-0.283289	-0.78868	-0.945602	-0.65994	-0.887865	-0.92043	-0.995079	-1.07691	-0.612112	-0.887865	0.275753	0.244454	0.735865	S	2	___1	14-3-3 domain binding motif;Akt kinase substrate motif;Calmodulin-dependent protein kinase II substrate motif;G protein-coupled receptor kinase 1 substrate motif;MAPKAPK1 kinase substrate motif;PKA kinase substrate motif;PKC kinase substrate motif
-0.010512	-0.29418	0.540758	NaN	0.354997	-0.738386	NaN	NaN	-1.15592	NaN	0.646654	-0.802002	NaN	NaN	-0.600694	NaN	NaN	-1.51615	NaN	NaN	-0.512655	NaN	0.776012	NaN	NaN	NaN	NaN	NaN	0.798959	0.709465	NaN	NaN	NaN	NaN	0.744139	0.58896	-0.225422	-0.640321	NaN	0.625008	NaN	-0.403418	0.625008	-1.02843	0.00315991	0.0488472	S	2	___2	14-3-3 domain binding motif;Akt kinase substrate motif;Calmodulin-dependent protein kinase II substrate motif;Casein kinase II substrate motif;G protein-coupled receptor kinase 1 substrate motif;MAPKAPK1 kinase substrate motif;PKA kinase substrate motif;PKC kinase substrate motif;ZIP kinase substrate motif
-0.010512	-0.29418	0.540758	NaN	0.354997	-0.738386	NaN	NaN	-1.15592	NaN	0.646654	-0.802002	NaN	NaN	-0.600694	NaN	NaN	-1.51615	NaN	NaN	-0.512655	NaN	0.776012	NaN	NaN	NaN	NaN	NaN	0.798959	0.709465	NaN	NaN	NaN	NaN	0.744139	0.58896	-0.225422	-0.640321	NaN	0.625008	NaN	-0.403418	0.625008	-1.02843	0.00315991	0.0488472	S	2	___2	14-3-3 domain binding motif;Akt kinase substrate motif;Calmodulin-dependent protein kinase II substrate motif;G protein-coupled receptor kinase 1 substrate motif;MAPKAPK1 kinase substrate motif;PKA kinase substrate motif;PKC kinase substrate motif
-0.0989756	-0.0263237	0.338507	-0.479285	-0.240444	0.265152	-0.168827	-0.129858	0.352351	0.129726	-0.0164543	-0.476272	0.128497	0.112061	-0.0989601	-0.13711	-0.375432	0.0465317	-0.272576	0.0701029	-0.189656	-0.570487	-0.415904	-0.0415153	NaN	-0.187666	NaN	0.161796	-0.18862	-0.154893	0.0201405	0.0306513	-0.267062	-0.735787	-0.266179	-0.989021	-0.243866	-0.0767676	0.00574264	-0.401571	-0.250514	-0.0989756	-0.216243	0.117267	0.422758	0.158717	S	2	___1	14-3-3 domain binding motif;Calmodulin-dependent protein kinase II substrate motif;Casein kinase II substrate motif;MAPKAPK1 kinase substrate motif;PAK2 kinase substrate motif;Pim1 kinase substrate sequence;PKA kinase substrate motif;PKC epsilon kinase substrate motif;PKC kinase substrate motif;ZIP kinase substrate motif
-0.968702	NaN	NaN	-0.0759281	-0.835009	-0.43462	-0.893689	-1.19756	0.164042	-0.622181	-0.229731	-0.33819	NaN	-0.250051	-0.516543	-0.698611	-1.1284	-0.357739	NaN	-0.801622	-0.65783	-0.424006	-0.52654	NaN	NaN	NaN	NaN	-0.201413	-0.545999	-0.805237	-0.337013	NaN	-0.248065	-0.724101	-0.870377	NaN	NaN	-0.562169	-0.54597	-0.598024	-0.561312	-0.52654	-0.561312	0.0347722	0.479511	0.829177	S	3	___1	b-Adrenergic Receptor kinase substrate motif;Casein kinase II substrate motif
-0.982719	-0.81964	-0.651211	-0.898249	NaN	-0.346802	-0.634375	-0.471738	NaN	-0.859195	-0.838876	-0.701899	-0.615918	-0.149173	NaN	-1.16112	-0.879588	-0.184936	NaN	-0.491529	-0.907673	-0.622554	NaN	-1.00385	-0.455483	-1.10617	NaN	NaN	-1.0206	-0.955697	-0.495866	NaN	-0.907658	-1.29508	-0.943619	-1.21399	-0.83171	-0.978674	NaN	NaN	-0.981302	-0.701899	-0.967185	0.265286	0.25488	0.00978572	S	3	___2	b-Adrenergic Receptor kinase substrate motif;Casein kinase II substrate motif
-0.982719	-0.81964	-0.651211	-0.898249	NaN	-0.346802	-0.634375	-0.471738	NaN	-0.859195	-0.838876	-0.701899	-0.615918	-0.149173	NaN	-1.16112	-0.879588	-0.184936	NaN	-0.491529	-0.907673	-0.622554	NaN	-1.00385	-0.455483	-1.10617	NaN	NaN	-1.0206	-0.904218	-0.495866	NaN	-0.907658	-1.29508	-0.943619	-1.30737	-0.83171	-0.978674	NaN	NaN	-0.981302	-0.701899	-0.961146	0.259247	0.261	0.0115954	S	3	___2	Casein kinase II substrate motif
0.595413	NaN	NaN	NaN	NaN	NaN	NaN	NaN	NaN	NaN	-0.207096	-0.541437	NaN	0.0215262	0.958678	NaN	-0.251427	-0.237483	NaN	0.475177	-0.0972619	NaN	0.0589088	NaN	-0.752206	NaN	NaN	NaN	NaN	0.530355	1.27295	NaN	0.175346	0.464394	0.547761	NaN	NaN	1.26194	NaN	NaN	NaN	-0.0972619	0.539058	-0.63632	0.0407039	0.0126565	S	3	___2	14-3-3 domain binding motif;Aurora-A kinase substrate motif;Calmodulin-dependent protein kinase II substrate motif;MAPKAPK2 kinase substrate motif;PAK2 kinase substrate motif;Phosphorylase kinase substrate motif;PKA kinase substrate motif;PKC epsilon kinase substrate motif;PKC kinase substrate motif
0.595413	NaN	NaN	NaN	NaN	NaN	NaN	NaN	NaN	NaN	-0.207096	-0.541437	NaN	0.0215262	0.958678	NaN	-0.251427	-0.237483	NaN	0.475177	-0.0972619	NaN	0.0589088	NaN	-0.752206	NaN	NaN	NaN	NaN	0.530355	1.27295	NaN	0.175346	0.464394	0.547761	NaN	NaN	1.26194	NaN	NaN	NaN	-0.0972619	0.539058	-0.63632	0.0407039	0.0126565	S	3	___2	ERK1,2 kinase substrate motif;Growth associated histone HI kinase substrate motif;GSK-3, ERK1, ERK2, CDK5 substrate motif;PKA kinase substrate motif;PKC kinase substrate motif;WW domain binding motif
NaN	2.22322	NaN	NaN	NaN	2.54091	NaN	NaN	3.01223	3.34105	NaN	NaN	NaN	NaN	2.69194	NaN	NaN	NaN	NaN	NaN	NaN	NaN	NaN	NaN	NaN	NaN	NaN	NaN	NaN	NaN	2.72577	NaN	2.72237	2.50876	NaN	NaN	2.23833	1.88899	2.47069	NaN	NaN	2.69194	2.48972	0.202219	0.322271	0.190141	S	3	___1	Aurora-A kinase substrate motif;Calmodulin-dependent protein kinase II substrate motif;G protein-coupled receptor kinase 1 substrate motif;GSK3 kinase substrate motif;PAK2 kinase substrate motif;Phosphorylase kinase substrate motif;Pim1 kinase substrate sequence;PKA kinase substrate motif;PKC kinase substrate motif
0.997697	0.635089	0.219678	1.21102	-1.01702	0.769823	-0.578208	1.1913	0.125573	0.981014	-0.694	-0.34145	NaN	0.229978	1.08054	0.878542	0.330899	0.159684	NaN	0.603453	0.347197	-0.260351	-1.13005	1.53798	NaN	0.617461	2.29002	NaN	0.194053	0.955304	0.42501	1.04798	0.172378	0.813378	0.127248	0.0553558	0.58907	0.874721	1.16615	0.533566	0.960933	0.347197	0.701224	-0.354028	0.151228	0.0870564	S	3	___1	14-3-3 domain binding motif;ATM kinase substrate motif;Calmodulin-dependent protein kinase II substrate motif;Calmodulin-dependent protein kinase IV substrate motif;Chk1 kinase substrate motif;DNA dependent Protein kinase substrate motif;PKA kinase substrate motif;PKC kinase substrate motif
0.690354	0.996019	0.623332	NaN	-2.45908	-0.65666	-3.32209	0.562579	-0.658586	1.18229	-2.38814	-0.600592	NaN	-0.987176	0.369784	1.02992	0.73366	0.895212	NaN	0.351361	0.0728286	NaN	NaN	1.07879	NaN	NaN	0.523329	NaN	-0.48182	0.152766	NaN	0.140584	0.184943	0.176912	-0.387475	-1.39178	0.0446434	0.738186	0.564081	0.504533	0.274924	0.369784	0.176912	0.192872	0.332859	0.544449	S	2	___1	G protein-coupled receptor kinase 1 substrate motif
NaN	NaN	NaN	NaN	NaN	6.62575	10.6562	2.22193	NaN	NaN	NaN	NaN	NaN	NaN	NaN	2.12186	NaN	7.97383	11.7768	NaN	2.69293	NaN	NaN	4.60676	NaN	NaN	10.6708	NaN	NaN	1.46118	5.99437	NaN	2.85721	NaN	NaN	NaN	NaN	NaN	2.14849	NaN	NaN	5.61626	2.85721	2.75904	0	0.518632	T	3	___1	Calmodulin-dependent protein kinase II substrate motif;Growth associated histone HI kinase substrate motif;GSK-3, ERK1, ERK2, CDK5 substrate motif;PAK2 kinase substrate motif;PKA kinase substrate motif;PKC kinase substrate motif;WW domain binding motif
NaN	NaN	NaN	-3.71269	NaN	-3.15938	NaN	NaN	-2.69276	NaN	-0.475527	NaN	NaN	-1.52466	-2.46367	-3.35769	-2.88296	-3.40006	NaN	NaN	-3.07832	NaN	NaN	NaN	NaN	NaN	NaN	NaN	NaN	-2.86468	-3.3319	NaN	-1.6488	-3.14844	-2.38806	NaN	NaN	-2.85127	NaN	NaN	-2.6148	-2.98064	-2.85127	-0.129368	0.320958	0.962864	S	2	___1	Cdc2 kinase substrate motif;CDK kinase substrate motif;CDK1,2,4,6 kinase substrate motif;ERK1,2 kinase substrate motif;Growth associated histone HI kinase substrate motif;GSK-3, ERK1, ERK2, CDK5 substrate motif;PKA kinase substrate motif;PKC kinase substrate motif;WW domain binding motif
-0.571266	NaN	NaN	NaN	-1.23997	-0.82288	NaN	NaN	NaN	NaN	-0.83378	NaN	NaN	-1.38394	-0.270793	-0.897973	-0.119628	-1.38612	NaN	NaN	-1.33885	-0.752139	-0.800652	NaN	NaN	NaN	-0.0518259	-0.625636	-0.618983	-0.546799	-1.05087	NaN	NaN	-0.335985	-1.16761	-0.596373	NaN	-0.239285	NaN	NaN	NaN	-0.82833	-0.596373	-0.231957	0.23467	0.107956	S	3	___2	Casein kinase II substrate motif;Pyruvate dehydrogenase kinase substrate motif
-0.571266	NaN	NaN	NaN	-1.23997	-0.82288	NaN	NaN	NaN	NaN	-0.83378	NaN	NaN	-1.38394	-0.270793	-0.897973	-0.119628	NaN	NaN	NaN	-1.33885	NaN	-0.800652	NaN	NaN	NaN	-0.0518259	NaN	-0.618983	-0.546799	-1.05087	NaN	NaN	-0.335985	-1.16761	-0.596373	NaN	-0.239285	NaN	NaN	NaN	-0.82833	-0.571586	-0.256744	0.215928	0.205049	T	3	___2	LKB1 kinase substrate motif
-0.887568	NaN	-0.228727	NaN	NaN	NaN	NaN	NaN	0.0821961	NaN	NaN	NaN	NaN	-1.07841	NaN	NaN	NaN	0.655702	NaN	NaN	NaN	NaN	NaN	NaN	NaN	NaN	NaN	NaN	-1.30217	NaN	-1.36166	NaN	NaN	-0.581477	-0.199043	NaN	-0.762998	NaN	NaN	NaN	NaN	-0.228727	-0.762998	0.534271	0.0664095	0.196725	S	3	___1	14-3-3 domain binding motif;Calmodulin-dependent protein kinase II substrate motif;Casein kinase II substrate motif;ERK1,2 kinase substrate motif;GSK-3, ERK1, ERK2, CDK5 substrate motif;PKA kinase substrate motif;PKC kinase substrate motif;WW domain binding motif
NaN	NaN	NaN	NaN	0.460913	0.0342755	NaN	NaN	NaN	NaN	0.139517	NaN	NaN	NaN	-0.389982	0.213099	NaN	NaN	NaN	NaN	0.896703	0.105726	0.803852	0.470326	NaN	-0.582136	NaN	0.80476	NaN	NaN	0.572787	-0.628506	-0.54887	-0.210208	1.21994	NaN	NaN	-1.10308	NaN	-0.543911	NaN	0.176308	-0.37706	0.553368	0.0590276	0.425233	S	2	___1	14-3-3 domain binding motif;Calmodulin-dependent protein kinase II alpha substrate motif;Calmodulin-dependent protein kinase II substrate motif;Calmodulin-dependent protein kinase IV substrate motif;Chk1 kinase substrate motif;Phosphorylase kinase substrate motif;PKA kinase substrate motif;PKC kinase substrate motif
1.32311	NaN	NaN	NaN	NaN	NaN	NaN	NaN	NaN	NaN	1.88134	1.74429	NaN	NaN	1.08942	1.83744	0.820627	NaN	NaN	1.36693	2.31494	2.13697	NaN	NaN	NaN	NaN	NaN	NaN	1.55094	NaN	NaN	NaN	-0.343464	1.58805	1.74435	NaN	NaN	1.05492	NaN	NaN	NaN	1.74429	1.55094	0.193344	0.332322	0.28514	S	3	___1	14-3-3 domain binding motif;AMP-activated protein kinase substrate motif;Aurora-A kinase substrate motif;Calmodulin-dependent protein kinase II substrate motif;Casein kinase II substrate motif;HMGCoA Reductase kinase substrate motif;PAK2 kinase substrate motif;PKA kinase substrate motif;PKC epsilon kinase substrate motif;PKC kinase substrate motif
0.190906	-0.842277	NaN	-0.992942	NaN	-1.31142	-1.07081	NaN	NaN	NaN	-2.07887	NaN	NaN	NaN	-0.734901	-0.45864	NaN	-1.31574	NaN	-0.0618916	NaN	-0.14364	NaN	-0.396387	NaN	NaN	NaN	NaN	NaN	0.216404	-1.72027	NaN	-1.42398	0.275846	-1.43773	NaN	-0.547581	0.784609	NaN	-0.637182	NaN	-0.788589	-0.592381	-0.196208	0.263215	0.592226	S	3	___2	Cdc2 kinase substrate motif;CDK kinase substrate motif;CDK1,2,4,6 kinase substrate motif;ERK1,2 kinase substrate motif;G protein-coupled receptor kinase 1 substrate motif;GSK-3, ERK1, ERK2, CDK5 substrate motif;WW domain binding motif
0.190906	-0.842277	NaN	-0.992942	NaN	-1.31142	-1.07081	NaN	NaN	NaN	-2.07887	NaN	NaN	NaN	-0.734901	-0.45864	NaN	-1.31574	NaN	-0.0618916	NaN	-0.14364	NaN	-0.396387	NaN	NaN	NaN	NaN	NaN	0.216404	-1.72027	NaN	-1.42398	0.275846	-1.43773	NaN	-0.547581	0.784609	NaN	-0.637182	NaN	-0.788589	-0.592381	-0.196208	0.263215	0.592226	T	3	___2	ERK1,2 kinase substrate motif;G protein-coupled receptor kinase 1 substrate motif;Growth associated histone HI kinase substrate motif;GSK3, Erk1, Erk2 and CDK5 kinase motif;GSK-3, ERK1, ERK2, CDK5 substrate motif;MAPKAPK2 kinase substrate motif;WW domain binding motif
-2.64012	-3.25094	NaN	-3.6114	NaN	-3.99514	NaN	NaN	NaN	NaN	-0.130054	NaN	NaN	-1.12407	NaN	NaN	-3.84586	NaN	NaN	NaN	-2.42652	-1.88625	NaN	NaN	NaN	NaN	NaN	-3.08359	-3.2739	-3.62016	-3.20031	-0.766972	-1.64716	-3.22482	-1.79097	NaN	-2.04148	-2.8259	-3.68541	NaN	-2.30268	-2.64012	-2.95474	0.314626	0.207822	0.883005	S	2	___1	Cdc2 kinase substrate motif;CDK kinase substrate motif;CDK1,2,4,6 kinase substrate motif;ERK1,2 kinase substrate motif;Growth associated histone HI kinase substrate motif;GSK-3, ERK1, ERK2, CDK5 substrate motif;PKA kinase substrate motif;PKC kinase substrate motif;WW domain binding motif
NaN	-1.37337	NaN	NaN	-1.35847	NaN	NaN	NaN	-0.809609	NaN	-0.961659	NaN	NaN	NaN	-1.01776	NaN	-0.766006	-1.25607	NaN	-1.15176	NaN	NaN	NaN	NaN	-2.50367	NaN	NaN	NaN	NaN	NaN	NaN	NaN	-1.0897	-1.09375	-1.59189	NaN	-1.03263	NaN	NaN	NaN	-0.779055	-1.15176	-1.0897	-0.0620598	0.383843	0.57171	S	3	___2	Casein kinase II substrate motif;ERK1,2 kinase substrate motif;G protein-coupled receptor kinase 1 substrate motif;GSK-3, ERK1, ERK2, CDK5 substrate motif;MAPKAPK2 kinase substrate motif;MDC1 BRCT domain binding motif;Plk1 PBD domain binding motif;WW domain binding motif
-0.985686	-1.37337	NaN	-0.851973	-1.35847	-1.08377	NaN	NaN	-0.809609	NaN	-0.961659	-1.2125	NaN	-0.617738	-1.01776	-1.14675	-0.766006	-1.25607	NaN	-1.15176	-1.25253	-1.34907	-1.17869	NaN	-2.50367	-1.12794	NaN	NaN	-1.3592	-0.843341	-1.03489	NaN	-1.0897	-1.09375	-1.43381	NaN	-1.03263	-1.22404	-1.41168	NaN	-0.779055	-1.14675	-1.09172	-0.0550242	0.390632	0.808501	S	3	___2	DNA dependent Protein kinase substrate motif;ERK1,2 kinase substrate motif;GSK-3, ERK1, ERK2, CDK5 substrate motif;WW domain binding motif
NaN	-1.19049	0.55285	-0.0984015	-0.679742	-0.391158	-0.91767	-0.101399	-0.931448	0.351119	-0.851727	NaN	NaN	-0.850469	-0.710969	-1.12476	0.320031	-0.199398	-1.29629	NaN	NaN	NaN	-1.40159	-0.645644	NaN	NaN	-0.799612	0.740576	-0.429741	-0.235831	-0.400552	1.39301	-1.0894	NaN	-1.86806	-1.51708	NaN	NaN	-0.10004	-0.0222708	-0.100152	-0.695355	-0.318192	-0.377164	0.13797	0.514631	S	3	___1	14-3-3 domain binding motif;Calmodulin-dependent protein kinase I substrate motif;Calmodulin-dependent protein kinase II alpha substrate motif;Calmodulin-dependent protein kinase II substrate motif;Calmodulin-dependent protein kinase IV substrate motif;Chk1 kinase substrate motif;Phosphorylase kinase substrate motif;PKA kinase substrate motif;PKC kinase substrate motif
-0.722994	NaN	1.05571	NaN	NaN	0.460325	-0.600966	0.894309	NaN	0.629763	-0.506519	NaN	NaN	-0.068663	0.0387089	NaN	0.563166	NaN	NaN	-0.304256	-1.00659	-0.546502	-0.514249	NaN	NaN	0.94488	NaN	1.3753	NaN	0.255922	0.273777	2.04641	-0.240472	-1.03257	-1.06464	NaN	NaN	0.213467	NaN	NaN	0.16525	-0.068663	0.213467	-0.28213	0.197664	0.606568	T	3	___1	Aurora-A kinase substrate motif;Calmodulin-dependent protein kinase II alpha substrate motif;Calmodulin-dependent protein kinase II substrate motif;Calmodulin-dependent protein kinase IV substrate motif;Casein kinase II substrate motif;Chk1 kinase substrate motif;G protein-coupled receptor kinase 1 substrate motif;PAK2 kinase substrate motif;PKA kinase substrate motif;PKC kinase substrate motif
-0.045451	NaN	NaN	1.36429	NaN	0.797541	NaN	0.840231	0.113675	NaN	-0.748802	0.979398	NaN	-0.457784	0.84344	-0.954883	-0.839829	-1.3258	-0.39098	0.432609	-0.627505	-1.00588	0.0629061	-0.777863	NaN	0.319049	NaN	-1.34418	NaN	-0.22112	0.308806	0.148945	0.65822	0.958017	-0.566437	NaN	0.498087	0.517264	-0.086041	NaN	0.443858	-0.045451	0.308806	-0.354257	0.151092	0.474184	S	2	___1	14-3-3 domain binding motif;b-Adrenergic Receptor kinase substrate motif;Calmodulin-dependent protein kinase II substrate motif;Casein kinase II substrate motif;MAPKAPK2 kinase substrate motif;Phosphorylase kinase substrate motif;PKA kinase substrate motif;PKC kinase substrate motif
-4.36747	NaN	NaN	-3.94913	-2.44611	NaN	NaN	NaN	-3.39218	-4.72151	0.475444	NaN	NaN	-3.10702	-3.90436	-4.12524	NaN	NaN	NaN	NaN	NaN	-2.61887	-5.12926	NaN	NaN	NaN	NaN	-3.47133	NaN	NaN	-3.56324	NaN	NaN	-4.13351	-2.34468	NaN	-3.98569	-4.32296	-4.85953	NaN	-3.7524	-3.90436	-3.86905	-0.03531	0.409826	0.446069	S	3	___1	Cdc2 kinase substrate motif;CDK kinase substrate motif;CDK1,2,4,6 kinase substrate motif;ERK1,2 kinase substrate motif;G protein-coupled receptor kinase 1 substrate motif;GSK-3, ERK1, ERK2, CDK5 substrate motif;PKA kinase substrate motif;PKC kinase substrate motif;WW domain binding motif
-4.51862	NaN	NaN	-6.22058	-4.16767	-5.03409	-4.26895	-4.21095	-3.49474	-3.78374	-0.564162	-4.10461	NaN	-3.34884	-5.57743	-3.94979	-4.08617	-5.42903	-3.74265	-5.38126	-3.82965	-2.42066	-3.5199	-4.14965	NaN	-7.21327	NaN	-2.80929	-5.62705	-5.79292	-5.62113	-4.04021	-2.0737	-4.08434	-2.55657	-4.14999	NaN	-4.93438	-5.626	NaN	-3.56817	-4.12713	-4.11716	-0.0099647	0.434818	0.979454	S	2	___1	Cdc2 kinase substrate motif;CDK kinase substrate motif;CDK1,2,4,6 kinase substrate motif;CDK4 kinase substrate motif;ERK1,2 kinase substrate motif;G protein-coupled receptor kinase 1 substrate motif;GSK-3, ERK1, ERK2, CDK5 substrate motif;PKA kinase substrate motif;WW domain binding motif
NaN	NaN	NaN	NaN	NaN	-1.85322	NaN	NaN	NaN	NaN	NaN	NaN	NaN	NaN	NaN	-1.71898	-1.76762	NaN	NaN	NaN	-3.02537	NaN	-1.32048	NaN	NaN	NaN	NaN	NaN	0.617303	NaN	-2.63723	NaN	-0.344398	NaN	-2.29309	-0.333661	-0.656703	0.661759	-0.408814	-0.0131195	NaN	-1.76762	-0.344398	-1.42322	9.74156e-05	0.0164544	S	3	___1	14-3-3 domain binding motif;Calmodulin-dependent protein kinase II substrate motif;G protein-coupled receptor kinase 1 substrate motif;MAPKAPK2 kinase substrate motif;PKA kinase substrate motif;PKC kinase substrate motif
NaN	NaN	NaN	1.97127	0.0891661	NaN	NaN	NaN	2.02259	NaN	-0.787803	0.63978	NaN	-0.549329	NaN	1.31386	NaN	0.689582	NaN	1.88991	0.762824	2.82196	NaN	NaN	NaN	1.70312	0.690251	NaN	2.24118	NaN	NaN	NaN	NaN	1.24292	1.79589	1.92772	NaN	1.52196	NaN	2.1394	NaN	1.03834	1.79589	-0.757547	0.0202763	0.130038	S	3	___1	14-3-3 domain binding motif;Akt kinase substrate motif;Calmodulin-dependent protein kinase II substrate motif;DNA dependent Protein kinase substrate motif;MAPKAPK1 kinase substrate motif;PKA kinase substrate motif;PKC kinase substrate motif
NaN	2.39174	2.21576	NaN	0.449295	NaN	1.23202	NaN	NaN	NaN	NaN	1.69692	NaN	NaN	NaN	NaN	NaN	1.78282	NaN	2.42194	NaN	1.82619	NaN	NaN	NaN	1.83526	3.50228	NaN	NaN	NaN	NaN	NaN	NaN	2.19253	NaN	1.58019	NaN	1.26988	NaN	1.63227	NaN	1.82619	1.63227	0.193923	0.331662	0.560721	T	3	___1	AMP-activated protein kinase substrate motif;Calmodulin-dependent protein kinase II substrate motif;Casein kinase II substrate motif;Growth associated histone HI kinase substrate motif;GSK-3, ERK1, ERK2, CDK5 substrate motif;PKC kinase substrate motif;WW domain binding motif
1.6775	NaN	NaN	NaN	4.42874	1.95898	NaN	NaN	2.33542	NaN	3.035	1.17971	NaN	2.61234	2.38767	1.94232	2.28701	1.65443	NaN	1.5911	3.22114	5.35025	3.66834	NaN	NaN	2.97369	NaN	NaN	NaN	2.36526	3.18046	NaN	2.41535	2.9419	2.46069	NaN	NaN	2.50997	2.33329	NaN	3.08127	2.36155	2.48533	-0.123785	0.326012	0.955849	S	3	___1	Casein kinase II substrate motif;G protein-coupled receptor kinase 1 substrate motif
-0.0100041	0.821652	NaN	-1.29618	-0.0919035	-0.0707774	1.70697	NaN	-0.315512	0.543289	0.985734	0.633674	NaN	-1.3884	0.737943	0.307603	0.887967	-2.25523	NaN	-0.264818	0.878573	3.07871	1.44571	NaN	NaN	NaN	NaN	NaN	0.938843	1.90938	0.624565	0.0625562	1.86107	1.57748	1.44657	1.52207	0.484792	0.788333	0.985538	NaN	1.54177	0.543289	1.21605	-0.672764	0.033296	0.0178012	S	2	___1	MAPKAPK2 kinase substrate motif;PKA kinase substrate motif;PKC kinase substrate motif
-0.853487	-0.793422	-0.641962	NaN	NaN	0.107543	NaN	NaN	-1.17097	0.444745	-0.283848	NaN	NaN	NaN	0.594287	0.198485	NaN	0.147353	NaN	NaN	-0.370544	NaN	NaN	-0.575622	NaN	NaN	NaN	NaN	NaN	-0.354598	NaN	NaN	0.492252	-0.725232	NaN	NaN	-0.380426	0.0990687	NaN	NaN	NaN	-0.327196	-0.354598	0.0274024	0.472116	0.736254	T	2	___1	Akt kinase substrate motif;Calmodulin-dependent protein kinase II substrate motif;Casein kinase II substrate motif;G protein-coupled receptor kinase 1 substrate motif;PKC kinase substrate motif
0.343366	0.737004	0.187401	0.291284	0.31039	0.613979	1.08976	0.543344	NaN	1.19805	0.296641	0.779071	NaN	-0.186603	0.554188	-0.18842	0.770993	0.281454	NaN	0.975307	0.163318	NaN	0.824845	1.31301	NaN	-0.440664	-0.0410824	-0.0743519	0.38688	0.542033	NaN	1.15981	0.694161	1.06462	-0.0823675	0.933553	NaN	0.361933	NaN	0.995948	0.17066	0.543344	0.464456	0.0788875	0.470331	0.946459	T	3	___2	G protein-coupled receptor kinase 1 substrate motif
0.343366	0.737004	0.187401	0.291284	0.31039	0.613979	1.08976	0.543344	NaN	1.19805	0.296641	0.779071	NaN	-0.186603	0.554188	-0.18842	0.770993	0.281454	NaN	0.975307	0.163318	-0.128208	0.824845	1.31301	NaN	-0.440664	-0.0410824	-0.0743519	0.38688	0.542033	0.262582	1.15981	0.694161	1.06462	-0.0823675	0.933553	0.858583	0.361933	NaN	0.995948	0.17066	0.443355	0.464456	-0.0211012	0.423799	0.762627	T	3	___2	G protein-coupled receptor kinase 1 substrate motif
-2.15072	NaN	NaN	NaN	NaN	NaN	NaN	NaN	NaN	-0.42495	NaN	NaN	NaN	NaN	-0.510769	NaN	NaN	NaN	NaN	-0.452104	-1.34563	NaN	NaN	NaN	NaN	NaN	NaN	NaN	NaN	NaN	-1.80133	NaN	1.35725	-1.28444	NaN	NaN	-0.10457	NaN	-0.00929756	NaN	-1.32605	-0.510769	-0.694504	0.183735	0.343339	0.464257	S	2	___1	b-Adrenergic Receptor kinase substrate motif;G protein-coupled receptor kinase 1 substrate motif
0.141382	-0.549662	NaN	NaN	-1.12808	-0.00721865	0.772169	NaN	-0.215432	0.297962	0.62671	-0.510655	NaN	-0.127382	0.527824	-0.234655	0.140739	-0.351216	NaN	-0.375873	-0.336972	1.21751	NaN	NaN	NaN	NaN	NaN	NaN	NaN	0.402686	-0.0239326	NaN	0.25935	0.670179	-0.27283	-1.38387	0.588551	0.54565	NaN	0.645816	NaN	-0.127382	0.402686	-0.530068	0.0701311	0.534473	S	2	___1	b-Adrenergic Receptor kinase substrate motif;Casein kinase II substrate motif;Pyruvate dehydrogenase kinase substrate motif
0.931788	0.935341	1.56454	0.480076	-0.0124201	1.14856	NaN	0.259825	-1.51295	NaN	-0.0112838	0.448829	NaN	-0.552553	0.632591	0.830171	0.802816	-0.180039	NaN	-0.0439801	0.516251	-0.100693	1.45501	1.04336	NaN	0.702024	NaN	0.776743	2.14008	1.49832	0.762462	1.55188	1.47565	0.544552	0.184875	1.36493	1.22039	0.970435	2.02563	1.2227	-0.0729945	0.516251	1.22154	-0.705289	0.0276582	0.00658514	S	3	___1	Casein kinase II substrate motif;DNA dependent Protein kinase substrate motif;G protein-coupled receptor kinase 1 substrate motif;PKA kinase substrate motif;PKC kinase substrate motif;Pyruvate dehydrogenase kinase substrate motif
NaN	NaN	NaN	-2.08029	NaN	-2.4663	NaN	-1.78997	-1.46988	-1.34787	NaN	-2.06058	NaN	NaN	NaN	NaN	-1.48434	-1.9305	-2.29309	-2.75403	-2.51303	-0.743907	-2.14007	NaN	NaN	NaN	NaN	-2.65203	-1.27334	-0.573097	-1.76008	-1.3927	-2.31088	NaN	-1.71244	-1.97236	NaN	-1.41056	-1.14012	NaN	-2.08559	-2.06058	-1.71244	-0.348146	0.154729	0.268072	S	3	___1	Casein kinase II substrate motif;Cdc2 kinase substrate motif;CDK kinase substrate motif;CDK1,2,4,6 kinase substrate motif;ERK1,2 kinase substrate motif;Growth associated histone HI kinase substrate motif;GSK-3, ERK1, ERK2, CDK5 substrate motif;WW domain binding motif
0.00766651	NaN	NaN	0.400424	NaN	0.00077254	NaN	-0.442813	-0.136313	NaN	0.54309	-0.529213	-0.589792	0.0379922	0.562794	0.0111949	0.256185	NaN	-0.125939	-0.081136	-0.438423	0.493073	0.318626	0.168817	NaN	NaN	NaN	-0.0177194	NaN	0.482639	-0.338134	0.532561	0.319794	0.858381	-0.349213	NaN	0.535111	0.251422	NaN	NaN	0.473423	0.00943073	0.396608	-0.387178	0.132485	0.118337	S	3	___1	Casein kinase I substrate motif;ERK1,2 kinase substrate motif;Growth associated histone HI kinase substrate motif;GSK-3, ERK1, ERK2, CDK5 substrate motif;PKA kinase substrate motif;PKC kinase substrate motif;WW domain binding motif
2.39196	1.95693	1.46888	1.17365	-0.518123	2.19727	1.16491	1.22542	0.190462	2.01236	0.907589	1.4369	-0.840908	0.341956	NaN	2.08687	1.81429	0.115111	0.737758	0.999745	2.04305	0.938514	0.413314	1.79248	NaN	1.40731	NaN	0.60831	NaN	1.76842	1.71239	1.35175	2.19268	2.35889	0.269213	1.84668	1.89052	2.06443	1.7844	NaN	1.15856	1.19954	1.77641	-0.576875	0.0556058	0.0927419	S	2	___1	14-3-3 domain binding motif;Calmodulin-dependent protein kinase II substrate motif;Casein kinase II substrate motif;MDC1 BRCT domain binding motif;PAK2 kinase substrate motif;PKA kinase substrate motif;PKA, PKG kinase substrate motif;PKC epsilon kinase substrate motif;PKC kinase substrate motif;PKG kinase substrate motif;Plk1 PBD domain binding motif
NaN	NaN	NaN	NaN	-0.507076	-0.683096	-1.45789	-0.813922	NaN	-1.21479	-0.66096	NaN	NaN	NaN	NaN	NaN	NaN	NaN	0.00876844	-0.617279	0.115443	-0.857655	-0.693037	-0.986228	NaN	-0.448947	NaN	-0.471432	NaN	NaN	NaN	NaN	NaN	-0.724204	-0.5434	-0.726441	NaN	-0.543011	NaN	-0.237895	NaN	-0.683096	-0.543205	-0.13989	0.311522	0.343182	S	3	___1	Cdc2 kinase substrate motif;CDK kinase substrate motif;CDK1,2,4,6 kinase substrate motif;ERK1,2 kinase substrate motif;GSK-3, ERK1, ERK2, CDK5 substrate motif;WW domain binding motif
NaN	NaN	NaN	0.395872	-0.674076	NaN	NaN	NaN	NaN	NaN	0.987107	NaN	NaN	NaN	NaN	NaN	0.0503994	NaN	NaN	NaN	0.579551	2.30039	0.264023	NaN	NaN	-0.175583	NaN	NaN	NaN	1.03833	NaN	NaN	1.01359	1.84301	-0.0209198	2.51653	1.23742	NaN	0.437728	1.44636	1.58106	0.329947	1.23742	-0.907474	0.0076352	0.0777719	S	4	___1	14-3-3 domain binding motif;b-Adrenergic Receptor kinase substrate motif;Calmodulin-dependent protein kinase II substrate motif;CLK1 kinase substrate motif;G protein-coupled receptor kinase 1 substrate motif;PKA kinase substrate motif;PKC epsilon kinase substrate motif;PKC kinase substrate motif
1.02263	-0.216637	-0.802565	-0.0325562	-1.57705	1.05318	0.604251	-3.57454	-1.67726	-0.309055	-1.25407	-2.15074	NaN	-2.23916	-1.04548	1.16802	1.06703	-1.45429	0.53867	-0.714915	-0.87734	-1.06479	0.438725	1.54295	NaN	-1.19891	-1.89538	-0.877007	2.41541	1.45601	-0.810615	-1.64404	2.23376	-0.489467	-0.994683	1.73953	0.942428	1.18563	1.83958	0.879797	-1.34791	-0.75874	0.879797	-1.63854	9.85165e-06	0.0850333	S	3	___1	14-3-3 domain binding motif;Calmodulin-dependent protein kinase II substrate motif;Casein kinase II substrate motif;PKA kinase substrate motif;PKC kinase substrate motif
1.45364	NaN	0.770518	-0.461585	NaN	NaN	NaN	-2.18161	NaN	1.26643	1.16762	NaN	NaN	NaN	0.353826	2.26186	2.7133	NaN	0.372133	0.687608	NaN	3.30652	-0.908797	1.5696	NaN	NaN	NaN	0.263951	NaN	1.30806	-1.49963	-0.737335	1.33387	NaN	0.501687	0.483101	0.889363	1.62522	1.41141	1.36458	1.11668	0.969068	1.00302	-0.0339561	0.411153	0.659042	S	4	___1	14-3-3 domain binding motif;b-Adrenergic Receptor kinase substrate motif;Calmodulin-dependent protein kinase II substrate motif;Casein kinase II substrate motif;PKA kinase substrate motif;PKC kinase substrate motif
1.20996	NaN	NaN	NaN	NaN	0.850991	NaN	NaN	NaN	NaN	NaN	NaN	NaN	NaN	1.31969	1.27724	1.81171	NaN	NaN	NaN	0.0526282	0.934004	NaN	NaN	NaN	NaN	NaN	NaN	NaN	1.10658	NaN	NaN	1.33034	1.44772	NaN	NaN	NaN	1.82349	NaN	NaN	0.995977	1.20996	1.33034	-0.120371	0.329117	0.299109	T	3	___1	Calmodulin-dependent protein kinase II substrate motif;Calmodulin-dependent protein kinase IV substrate motif;Casein kinase II substrate motif;Chk1 kinase substrate motif;G protein-coupled receptor kinase 1 substrate motif;PKC kinase substrate motif
NaN	0.0872275	0.625978	0.543423	-0.0691539	NaN	-0.000482375	0.650197	-0.0958117	1.09603	1.10646	-0.208631	NaN	-0.218222	1.12899	0.490722	0.58211	-0.4464	NaN	-0.14969	0.703803	1.11862	0.819343	NaN	NaN	0.473602	NaN	0.0662038	0.863199	0.719545	0.63896	NaN	0.882243	0.813136	0.586316	NaN	0.9721	0.882885	1.27695	0.741262	NaN	0.517072	0.813136	-0.296064	0.188049	0.0207267	S	2	___1	14-3-3 domain binding motif;Calmodulin-dependent protein kinase II substrate motif;Casein kinase II substrate motif;MDC1 BRCT domain binding motif;PAK2 kinase substrate motif;PKA kinase substrate motif;PKA, PKG kinase substrate motif;PKC epsilon kinase substrate motif;PKC kinase substrate motif;PKG kinase substrate motif;Plk1 PBD domain binding motif
-2.28285	-2.08504	-0.33858	-2.04726	-2.94983	-1.3655	NaN	-0.68123	-1.22005	-0.63446	-4.0875	-1.76693	NaN	-1.73502	-1.33991	-1.86497	-0.795417	-1.42367	NaN	-1.66855	-1.79293	-3.05404	-4.06214	NaN	NaN	-0.434703	NaN	-3.38836	-3.18378	-1.13225	-1.463	-1.37396	0.196171	-2.50424	-2.53021	NaN	-1.88444	-1.15403	-0.650318	-1.83823	-1.39215	-1.73502	-1.463	-0.272023	0.204821	0.833118	S	2	___1	PKA kinase substrate motif;PKC kinase substrate motif
-0.867035	-2.12767	-0.626703	-2.15936	-2.69806	-2.10685	-1.99045	-2.50754	-3.41385	-1.51426	-2.38032	-2.57039	-3.62135	-2.26481	-2.3961	-2.01173	-1.19324	-3.06379	NaN	-2.7712	-2.48949	-1.68993	-2.64282	NaN	NaN	-3.2032	NaN	-3.30601	-1.50419	-0.946476	-2.3116	-1.73039	-1.12702	-1.54876	-1.93243	-1.8472	-1.57158	-1.95561	-1.43779	-2.94891	-2.69891	-2.38032	-1.7888	-0.591521	0.0515847	0.149109	S	4	___1	Casein kinase II substrate motif;Cdc2 kinase substrate motif;CDK kinase substrate motif;CDK1,2,4,6 kinase substrate motif;ERK1,2 kinase substrate motif;GSK-3, ERK1, ERK2, CDK5 substrate motif;WW domain binding motif
0.467282	-0.00120268	0.514242	-0.805978	NaN	-0.588853	NaN	0.100005	-0.705045	0.67485	-3.40679	-0.300286	NaN	-1.52068	0.409782	-0.0038994	0.18483	-0.569232	NaN	-0.202231	-1.17645	NaN	NaN	-1.73857	NaN	0.354369	NaN	NaN	NaN	-0.573312	-0.80249	0.860292	0.463356	-0.407581	NaN	NaN	0.434583	0.23443	-0.246332	NaN	-1.19717	-0.202231	-0.246332	0.0441012	0.488883	0.359733	S	3	___1	b-Adrenergic Receptor kinase substrate motif;Casein kinase II substrate motif;MAPKAPK2 kinase substrate motif
NaN	NaN	NaN	NaN	NaN	NaN	0.46258	1.78269	NaN	1.72481	NaN	0.608459	NaN	NaN	0.281389	-1.04462	1.79184	NaN	NaN	NaN	NaN	0.358003	NaN	NaN	NaN	NaN	NaN	NaN	NaN	NaN	2.41755	3.19545	-0.243117	0.91658	0.972876	NaN	NaN	0.880872	1.75672	0.945202	NaN	0.53552	0.959039	-0.423519	0.11385	0.254949	S	2	___1	14-3-3 domain binding motif;Akt kinase substrate motif;Calmodulin-dependent protein kinase II substrate motif;Casein kinase II substrate motif;G protein-coupled receptor kinase 1 substrate motif;MAPKAPK1 kinase substrate motif;p70 Ribosomal S6 kinase substrate motif;Phosphorylase kinase substrate motif;PKA kinase substrate motif;PKC epsilon kinase substrate motif;PKC kinase substrate motif
-0.123531	-0.620672	NaN	NaN	NaN	0.801803	NaN	1.09562	0.360535	NaN	0.810929	NaN	NaN	0.695395	0.871444	-0.459084	-0.371556	NaN	0.882288	0.367363	-0.223967	NaN	NaN	NaN	NaN	1.17629	NaN	NaN	0.806811	1.20924	NaN	NaN	0.264401	0.272603	NaN	NaN	NaN	0.451525	1.11704	NaN	1.73903	0.531379	0.806811	-0.275432	0.20239	0.106025	S	2	___1
NaN	NaN	NaN	NaN	NaN	NaN	NaN	NaN	NaN	NaN	NaN	NaN	NaN	0.0836956	NaN	0.838158	NaN	NaN	NaN	NaN	0.240737	0.828405	NaN	0.149585	NaN	NaN	NaN	0.0669922	NaN	1.15679	NaN	0.333612	NaN	1.60023	0.392142	NaN	NaN	1.4126	1.19577	NaN	NaN	0.240737	1.15679	-0.916057	0.00719195	0.141276	S	3	___1	MDC1 BRCT domain binding motif;Plk1 PBD domain binding motif
1.09416	0.634476	1.00733	1.2425	-0.871795	-0.868235	-0.00260834	0.825801	0.310657	1.06286	1.08963	-0.358231	NaN	-0.594164	0.978321	0.59253	1.2015	0.248228	0.532626	0.0290497	-0.307118	0.783464	-0.0249604	0.124294	-1.13945	0.723782	0.379587	-0.349767	1.33379	0.946549	-0.484106	0.905604	-0.0764723	-0.61755	0.12432	0.613962	0.723279	0.957691	1.03799	1.20826	0.987223	0.532626	0.723279	-0.190652	0.267805	0.415967	S	3	___2	ERK1,2 kinase substrate motif;GSK-3, ERK1, ERK2, CDK5 substrate motif;MAPKAPK2 kinase substrate motif;PKA kinase substrate motif;PKC kinase substrate motif;WW domain binding motif
1.09416	0.634476	1.00733	1.2425	-0.871795	-0.868235	-0.00260834	0.825801	0.310657	1.06286	1.08963	-0.358231	NaN	-0.594164	0.968478	0.59253	1.2015	0.248228	0.532626	0.0290497	-0.307118	0.783464	-0.0249604	0.124294	-1.13945	0.723782	0.379587	-0.349767	1.33379	0.946549	-0.484106	0.905604	-0.0764723	-0.61755	0.12432	0.613962	0.723279	0.957691	1.03799	1.20826	0.979274	0.532626	0.723279	-0.190652	0.267805	0.416042	S	3	___2	ERK1,2 kinase substrate motif;Growth associated histone HI kinase substrate motif;GSK-3, ERK1, ERK2, CDK5 substrate motif;PKA kinase substrate motif;PKC kinase substrate motif;WW domain binding motif
NaN	NaN	NaN	NaN	NaN	NaN	2.93236	2.2542	NaN	NaN	2.55622	NaN	NaN	1.32816	2.47533	NaN	NaN	NaN	NaN	1.24363	NaN	NaN	1.97881	NaN	NaN	NaN	NaN	NaN	1.80737	1.78991	1.54109	NaN	1.21491	1.64334	1.18199	NaN	2.24505	1.58463	NaN	NaN	2.87	2.2542	1.64334	0.610861	0.0406356	0.266978	S	4	___2	Casein kinase II substrate motif;Pyruvate dehydrogenase kinase substrate motif
NaN	NaN	NaN	NaN	2.30701	NaN	2.93236	2.2542	NaN	NaN	2.55622	NaN	NaN	1.32816	2.47533	NaN	NaN	NaN	NaN	NaN	NaN	NaN	1.97881	NaN	NaN	NaN	NaN	NaN	1.80737	1.78991	1.54109	NaN	1.21491	1.64334	1.18199	NaN	2.24505	NaN	NaN	NaN	2.87	2.30701	1.71663	0.590385	0.0465642	0.106716	S	4	___2	MDC1 BRCT domain binding motif;Plk1 PBD domain binding motif
-1.1071	-1.18152	NaN	NaN	NaN	-1.0599	NaN	-1.87061	-1.2443	0.2771	-2.57094	-0.980818	NaN	-1.43417	-0.532708	-1.39823	0.172436	-2.57994	-2.43494	-0.346864	-1.57641	NaN	-2.36103	-2.41496	NaN	-0.0701912	NaN	-2.40604	-3.49823	-0.462267	-0.428855	-0.657458	0.170659	-0.426218	-2.44165	NaN	-0.17474	-0.00912089	-0.433851	NaN	NaN	-1.2443	-0.433851	-0.810453	0.0145768	0.456342	S	2	___1	14-3-3 domain binding motif;Calmodulin-dependent protein kinase II alpha substrate motif;Calmodulin-dependent protein kinase II substrate motif;Calmodulin-dependent protein kinase IV substrate motif;Casein kinase II substrate motif;Chk1 kinase substrate motif;Phosphorylase kinase substrate motif;PKA kinase substrate motif;PKC epsilon kinase substrate motif;PKC kinase substrate motif
NaN	NaN	0.117312	-0.0333373	NaN	0.0376238	0.427772	0.00965416	0.678558	-0.206274	-0.0293116	0.431681	NaN	0.380847	0.0416286	0.0267203	-0.230578	0.0515826	-0.0014722	NaN	0.473741	0.342036	0.0755809	NaN	NaN	0.0612268	NaN	0.337993	NaN	-0.309376	0.43351	-0.193729	-0.15916	0.38594	0.350255	NaN	-0.245068	0.0745927	NaN	NaN	NaN	0.0515826	0.0745927	-0.0230101	0.421916	0.587062	S	3	___1	14-3-3 domain binding motif;Akt kinase substrate motif;AMP-activated protein kinase 2 substrate motif;Calmodulin-dependent protein kinase II substrate motif;Casein kinase II substrate motif;ERK1,2 kinase substrate motif;GSK-3, ERK1, ERK2, CDK5 substrate motif;MAPKAPK1 kinase substrate motif;MDC1 BRCT domain binding motif;PKA kinase substrate motif;PKC kinase substrate motif;Plk1 PBD domain bindin…
0.0904531	-0.281468	-1.24213	NaN	0.607611	NaN	-1.45216	NaN	-0.247879	NaN	NaN	0.456497	NaN	-0.30883	-0.683964	-1.11331	NaN	-0.185168	NaN	-0.860151	NaN	0.616738	-0.994644	NaN	NaN	-1.64504	NaN	NaN	-0.511957	NaN	NaN	NaN	-1.22102	NaN	0.109976	-0.389601	-0.405861	NaN	NaN	-1.09049	-0.55677	-0.30883	-0.511957	0.203128	0.32125	0.705178	S	3	___2	Casein kinase I substrate motif;PKA kinase substrate motif;PKC kinase substrate motif
0.0904531	-0.281468	-1.24213	NaN	0.607611	NaN	-1.45216	NaN	-0.247879	NaN	NaN	0.456497	NaN	-0.30883	-0.683964	-1.11331	NaN	-0.185168	NaN	-0.860151	NaN	0.616738	-0.994644	NaN	NaN	-1.64504	NaN	NaN	-0.511957	NaN	NaN	NaN	-1.22102	NaN	0.109976	-0.389601	-0.405861	NaN	NaN	-1.09049	-0.55677	-0.30883	-0.511957	0.203128	0.32125	0.705178	S	3	___2	14-3-3 domain binding motif;Akt kinase substrate motif;AMP-activated protein kinase 2 substrate motif;Calmodulin-dependent protein kinase II substrate motif;Casein kinase II substrate motif;ERK1,2 kinase substrate motif;GSK-3, ERK1, ERK2, CDK5 substrate motif;MAPKAPK1 kinase substrate motif;MDC1 BRCT domain binding motif;PKA kinase substrate motif;PKC kinase substrate motif;Plk1 PBD domain bindin…
1.2954	0.962517	NaN	2.40842	-1.06597	-0.343148	1.42271	NaN	NaN	0.710884	0.334247	-0.55921	NaN	-1.05524	0.992088	1.05748	NaN	-0.527003	1.36192	0.508698	-0.246405	0.499261	-0.951423	NaN	NaN	0.500758	-0.0126459	-0.223513	NaN	1.18459	-0.71014	1.48813	-0.0512054	0.784788	0.320828	NaN	0.619016	1.09728	NaN	1.28568	NaN	0.500758	0.619016	-0.118259	0.331046	0.651803	S	2	___1	Casein kinase II substrate motif;ERK1,2 kinase substrate motif;GSK-3, ERK1, ERK2, CDK5 substrate motif;MAPKAPK2 kinase substrate motif;MDC1 BRCT domain binding motif;PKA kinase substrate motif;PKC kinase substrate motif;Plk1 PBD domain binding motif;WW domain binding motif
2.58283	NaN	NaN	NaN	NaN	NaN	NaN	NaN	2.91801	NaN	NaN	-0.647075	NaN	NaN	2.62413	NaN	NaN	NaN	NaN	-0.549204	NaN	NaN	NaN	NaN	NaN	NaN	NaN	NaN	NaN	1.4758	NaN	3.2052	1.03983	1.5963	NaN	NaN	2.41242	1.17715	NaN	NaN	NaN	2.58283	1.53605	1.04678	0.000932428	0.642897	S	3	___2	b-Adrenergic Receptor kinase substrate motif;Casein kinase II substrate motif;G protein-coupled receptor kinase 1 substrate motif;GSK3 kinase substrate motif;PKA kinase substrate motif
NaN	NaN	NaN	NaN	NaN	NaN	1.11314	1.36095	2.91801	1.01956	NaN	NaN	NaN	NaN	0.380505	NaN	NaN	NaN	NaN	-0.549204	NaN	1.28553	NaN	NaN	NaN	NaN	NaN	NaN	0.785461	NaN	0.974247	2.44795	NaN	1.5963	0.931034	NaN	2.41242	1.17715	NaN	NaN	2.99095	1.11314	1.38672	-0.273582	0.203707	0.259802	S	3	___2	Casein kinase II substrate motif;MDC1 BRCT domain binding motif;PKA kinase substrate motif;PKC kinase substrate motif;Plk1 PBD domain binding motif
NaN	NaN	NaN	NaN	NaN	NaN	1.11314	1.36095	NaN	1.01956	NaN	NaN	NaN	NaN	0.380505	NaN	NaN	NaN	NaN	NaN	1.55	NaN	NaN	NaN	NaN	NaN	NaN	NaN	0.785461	1.4758	0.974247	1.6907	-2.37583	NaN	NaN	NaN	NaN	2.41019	NaN	NaN	NaN	1.11314	1.22502	-0.11188	0.336895	0.729241	S	2	___2	Casein kinase II substrate motif;ERK1,2 kinase substrate motif;GSK-3, ERK1, ERK2, CDK5 substrate motif;MAPKAPK2 kinase substrate motif;MDC1 BRCT domain binding motif;PKA kinase substrate motif;PKC kinase substrate motif;Plk1 PBD domain binding motif;WW domain binding motif
NaN	NaN	NaN	-0.901872	-1.80657	NaN	NaN	NaN	-1.13856	0.925422	0.207288	-0.0575319	-1.34098	-1.5159	NaN	0.544392	NaN	NaN	NaN	NaN	-0.598371	1.06908	0.0244541	-0.940023	NaN	0.217457	NaN	-0.62822	NaN	1.11848	NaN	NaN	1.42168	NaN	-0.561011	NaN	NaN	0.9379	NaN	NaN	NaN	-0.327952	0.9379	-1.26585	0.000435733	0.14061	S	3	___2	14-3-3 domain binding motif;b-Adrenergic Receptor kinase substrate motif;Calmodulin-dependent protein kinase II substrate motif;Casein kinase II substrate motif;ERK1,2 kinase substrate motif;G protein-coupled receptor kinase 1 substrate motif;GSK-3, ERK1, ERK2, CDK5 substrate motif;PKA kinase substrate motif;PKC kinase substrate motif;WW domain binding motif
NaN	NaN	NaN	-0.901872	-1.80657	NaN	NaN	NaN	-1.13856	0.925422	0.207288	-0.0575319	-1.34098	-1.5159	NaN	0.544392	NaN	NaN	NaN	NaN	-0.598371	1.06908	0.0244541	-0.940023	NaN	0.217457	NaN	-0.62822	NaN	1.11848	NaN	NaN	1.42168	NaN	-0.561011	NaN	NaN	0.9379	NaN	NaN	NaN	-0.327952	0.9379	-1.26585	0.000435733	0.14061	T	3	___2	Calmodulin-dependent protein kinase II substrate motif;GSK-3, ERK1, ERK2, CDK5 substrate motif;PKC kinase substrate motif;WW domain binding motif
1.64792	NaN	NaN	-0.644602	-0.97833	-0.259603	-0.313153	0.109975	-0.561901	0.101609	-0.730588	-0.0439203	NaN	-0.298228	0.162516	0.1083	0.260524	-0.341986	-1.40792	0.343283	-0.778104	-1.07535	NaN	-0.290683	NaN	0.271693	NaN	-1.07375	NaN	-0.484339	-0.452454	0.198888	0.427781	-0.384474	-0.540094	NaN	3.04593	0.38341	-0.0722758	NaN	-0.139447	-0.290683	-0.139447	-0.151236	0.301486	0.400755	S	2	___1	14-3-3 domain binding motif;Calmodulin-dependent protein kinase I substrate motif;Calmodulin-dependent protein kinase II substrate motif;Calmodulin-dependent protein kinase IV substrate motif;Casein kinase II substrate motif;Chk1 kinase substrate motif;MDC1 BRCT domain binding motif;PKA kinase substrate motif;PKC kinase substrate motif;Plk1 PBD domain binding motif
0.451056	0.632615	0.503076	0.503062	-1.31249	1.03155	-0.852856	0.650852	-0.389348	0.572993	NaN	1.58386	NaN	0.326404	0.755453	0.940826	0.83586	0.0328515	NaN	1.08629	0.107348	-2.03066	-1.05588	0.48733	NaN	1.20698	0.890173	-0.0663744	NaN	0.0933192	0.289337	NaN	1.29302	NaN	-0.23736	-0.382319	0.152439	0.560327	0.468064	0.283785	0.0207542	0.503069	0.218112	0.284957	0.235478	0.984286	S	3	___1	Casein kinase II substrate motif
-0.15081	-0.189037	NaN	-0.457718	-2.43642	-0.109873	NaN	-0.758755	-1.83902	-0.217012	-2.68164	NaN	NaN	-0.133964	-0.690816	NaN	-0.462412	-1.30161	-1.85412	0.0375263	NaN	-2.92475	-2.20579	NaN	NaN	0.595273	NaN	-0.999603	NaN	-0.843607	-0.578681	0.571166	NaN	NaN	NaN	-2.09353	-0.974649	-0.744067	NaN	NaN	-0.589152	-0.576614	-0.793837	0.217223	0.305577	0.573762	S	2	___1	14-3-3 domain binding motif;ATM kinase substrate motif;Calmodulin-dependent protein kinase II substrate motif;DNA dependent Protein kinase substrate motif;PKA kinase substrate motif;PKC kinase substrate motif;ZIP kinase substrate motif
-1.5541	-1.28159	NaN	-1.41141	-2.77832	-1.23165	-1.80091	NaN	-2.52894	-0.656896	-3.6724	-1.11861	NaN	-1.02355	-1.34412	-2.10811	-0.81202	-1.84058	NaN	-0.253106	-1.62305	-4.09137	-3.16789	-0.428766	NaN	-0.737113	NaN	NaN	-3.02297	-1.35195	-1.10159	-0.748803	0.407767	-1.54744	-2.33347	NaN	-1.57779	-1.05702	-0.460495	-0.184473	NaN	-1.41141	-1.10159	-0.309824	0.178843	0.181804	S	2	___1	G protein-coupled receptor kinase 1 substrate motif;MAPKAPK2 kinase substrate motif
0.115319	NaN	NaN	-0.993345	NaN	NaN	NaN	NaN	NaN	NaN	NaN	0.185966	NaN	NaN	NaN	-1.04136	0.247029	NaN	NaN	0.11114	-0.624867	NaN	NaN	NaN	NaN	NaN	NaN	NaN	NaN	-1.37785	NaN	0.420882	-0.485154	NaN	NaN	NaN	-0.249417	NaN	NaN	NaN	-2.37128	0.11114	-0.485154	0.596294	0.0447862	0.362276	S	2	___2	14-3-3 domain binding motif;Calmodulin-dependent protein kinase I substrate motif;Calmodulin-dependent protein kinase II substrate motif;Calmodulin-dependent protein kinase IV substrate motif;Casein kinase II substrate motif;Chk1 kinase substrate motif;MDC1 BRCT domain binding motif;PKA kinase substrate motif;PKC kinase substrate motif;Plk1 PBD domain binding motif
0.808116	0.224439	NaN	0.441003	NaN	0.590269	-0.158862	NaN	-0.091138	0.469833	NaN	0.729191	NaN	-0.783265	NaN	0.878276	0.668034	NaN	NaN	0.200416	-0.0422282	-0.378394	NaN	0.269075	NaN	0.424996	NaN	-0.742142	0.395606	0.7612	0.161395	NaN	0.364938	0.775172	-0.194006	NaN	0.8505	0.843287	0.533692	0.747258	0.440804	0.347036	0.487248	-0.140212	0.311235	0.425558	S	3	___1	14-3-3 domain binding motif;Calmodulin-dependent protein kinase II substrate motif;Casein kinase II substrate motif;DNA dependent Protein kinase substrate motif;ERK1,2 kinase substrate motif;GSK-3, ERK1, ERK2, CDK5 substrate motif;PKA kinase substrate motif;PKC kinase substrate motif;WW domain binding motif
-0.143392	NaN	-0.522514	-1.11166	NaN	NaN	NaN	-1.30012	NaN	NaN	NaN	-0.74257	NaN	-1.95661	-0.396616	-0.540563	NaN	-2.33744	NaN	-0.95222	-1.13237	-1.5969	NaN	NaN	NaN	-1.17318	NaN	NaN	-0.570949	-0.534128	NaN	NaN	-0.916977	-1.18848	-1.13465	NaN	NaN	-0.510274	-0.564565	NaN	NaN	-1.11166	-0.570949	-0.540715	0.0665944	0.172389	S	3	___2	Casein kinase II substrate motif;ERK1,2 kinase substrate motif;G protein-coupled receptor kinase 1 substrate motif;Growth associated histone HI kinase substrate motif;GSK-3, ERK1, ERK2, CDK5 substrate motif;WW domain binding motif
-0.143392	-0.74893	-0.522514	-1.11166	NaN	NaN	NaN	-1.30012	-1.0445	NaN	NaN	-0.74257	NaN	-1.95661	-0.396616	-0.540563	0.0269908	-2.33744	NaN	-0.95222	-1.13237	-1.5969	-1.74534	NaN	NaN	-1.17318	NaN	NaN	-0.570949	-0.534128	NaN	NaN	-0.916977	-1.18848	-1.13465	NaN	-0.165606	-0.510274	-0.564565	NaN	NaN	-1.0445	-0.567757	-0.476746	0.0900511	0.11316	S	3	___2	14-3-3 domain binding motif;Calmodulin-dependent protein kinase II substrate motif;Casein kinase II substrate motif;DNA dependent Protein kinase substrate motif;ERK1,2 kinase substrate motif;GSK-3, ERK1, ERK2, CDK5 substrate motif;PKA kinase substrate motif;PKC kinase substrate motif;WW domain binding motif
0.998336	NaN	NaN	2.3803	-1.07599	0.205943	NaN	1.22871	NaN	NaN	-0.242253	NaN	NaN	-0.308149	0.758296	0.740571	NaN	-0.23424	NaN	NaN	0.621867	NaN	NaN	NaN	NaN	NaN	NaN	-0.412915	0.446651	0.296241	NaN	NaN	1.07892	1.12823	0.422472	-0.434987	0.680185	NaN	1.37672	NaN	NaN	0.621867	0.446651	0.175215	0.353221	0.893999	S	2	___2	14-3-3 domain binding motif;ATM kinase substrate motif;Calmodulin-dependent protein kinase I substrate motif;Calmodulin-dependent protein kinase II substrate motif;Calmodulin-dependent protein kinase IV substrate motif;Casein kinase II substrate motif;DNA dependent Protein kinase substrate motif;PKA kinase substrate motif;PKC kinase substrate motif
0.998336	NaN	NaN	2.3803	-1.07599	NaN	NaN	1.22871	NaN	NaN	-0.242253	NaN	NaN	-0.308149	0.758296	0.740571	NaN	-0.23424	NaN	NaN	0.621867	NaN	NaN	NaN	NaN	NaN	NaN	-0.412915	0.354824	0.296241	NaN	NaN	1.07892	1.12823	0.422472	-0.434987	0.680185	NaN	1.37672	NaN	NaN	0.681219	0.422472	0.258747	0.26151	0.974803	S	2	___2	b-Adrenergic Receptor kinase substrate motif;Casein kinase II substrate motif
2.45838	3.29754	2.71086	2.68643	1.50756	3.39585	3.14579	NaN	NaN	2.51839	NaN	2.63639	NaN	2.6743	2.4649	2.86578	1.50722	1.99808	2.43792	3.0445	3.18439	0.201772	NaN	NaN	NaN	4.21124	NaN	3.18446	1.94002	1.96571	2.796	2.06145	1.98057	2.34454	2.0253	NaN	NaN	1.70294	2.31925	NaN	2.74053	2.6743	2.06145	0.612854	0.0400927	0.223582	S	2	___1	14-3-3 domain binding motif;ATM kinase substrate motif;Calmodulin-dependent protein kinase II substrate motif;DNA dependent Protein kinase substrate motif;PKA kinase substrate motif;PKC kinase substrate motif;ZIP kinase substrate motif
2.21142	3.22527	1.9634	2.92195	0.962177	4.46815	2.70575	3.55306	3.24864	2.02703	1.72289	2.41206	NaN	3.01415	3.45265	2.76907	2.46517	1.37559	NaN	3.11468	3.14085	1.6933	2.01137	NaN	NaN	4.48295	4.38362	2.55132	1.42497	2.72932	3.25133	1.39944	2.33937	3.21895	2.37821	1.28824	2.97365	3.02786	2.54942	2.59046	3.23954	2.73741	2.59046	0.146956	0.38668	0.845979	S	2	___1	G protein-coupled receptor kinase 1 substrate motif;PKA kinase substrate motif;PKC kinase substrate motif
2.40389	NaN	NaN	1.40828	NaN	1.87331	NaN	2.25896	NaN	NaN	NaN	NaN	NaN	NaN	NaN	2.48113	0.801671	0.938081	NaN	2.29603	2.57228	NaN	NaN	NaN	NaN	NaN	NaN	NaN	NaN	1.55683	0.922853	NaN	NaN	2.00949	1.91616	NaN	NaN	1.59003	NaN	NaN	NaN	2.25896	1.59003	0.668934	0.0270805	0.342048	S	3	___2	Casein kinase II substrate motif;ERK1,2 kinase substrate motif;GSK-3, ERK1, ERK2, CDK5 substrate motif;MAPKAPK2 kinase substrate motif;WW domain binding motif
0.420042	NaN	NaN	NaN	NaN	NaN	NaN	-0.39167	-0.540326	NaN	NaN	NaN	NaN	NaN	0.966125	-0.332886	0.167613	NaN	NaN	NaN	-0.077736	0.471256	0.538669	NaN	NaN	NaN	NaN	NaN	NaN	1.50716	-0.00347665	-0.815045	0.159611	1.78675	-0.0677116	NaN	NaN	0.82026	0.896934	NaN	NaN	0.167613	0.489936	-0.322323	0.17073	0.280023	S	2	___1	Casein kinase I substrate motif;Casein kinase II substrate motif
0.983455	0.34796	NaN	0.20411	0.35626	1.56574	1.89377	0.414037	0.893868	0.965065	1.65359	0.658377	0.0450551	-0.121667	1.66341	-0.18998	1.17072	0.171128	NaN	0.388716	-0.529861	1.79665	NaN	0.869275	NaN	0.276568	0.377224	0.5722	1.70645	1.72261	0.618488	-0.0551373	1.56227	1.17564	0.559543	2.05853	1.7426	0.985136	1.12981	1.82998	1.60582	0.536207	1.17564	-0.639434	0.0400226	0.0421538	S	2	___1	Casein kinase II substrate motif;PKA kinase substrate motif;PKC kinase substrate motif
0.683081	-1.34186	-0.178443	0.195307	-0.216864	0.475718	1.31049	0.0228025	-0.00993826	NaN	0.504483	0.430231	-0.474926	-0.130079	0.717627	-0.677134	0.668397	0.000933043	NaN	0.175545	-0.943613	0.49207	0.352604	0.214764	-0.314773	-0.083179	-0.137732	-0.0896252	0.858042	1.13626	0.159176	-0.12585	1.07773	1.05922	0.129788	1.34414	0.825702	0.551484	0.463338	0.844146	0.497496	0.0991737	0.551484	-0.45231	0.100473	0.00764795	S	2	___2	Casein kinase II substrate motif;PKA kinase substrate motif;PKC kinase substrate motif
0.683081	-1.34186	-0.178443	0.195307	-0.216864	0.475718	1.31049	0.0228025	-0.00993826	NaN	0.504483	0.430231	-0.474926	-0.130079	0.717627	-0.677134	0.668397	0.000933043	NaN	0.175545	-0.943613	0.49207	0.352604	0.214764	-0.314773	-0.083179	-0.137732	-0.0896252	0.858042	1.13626	0.159176	-0.12585	1.07773	1.05922	0.129788	1.34414	0.825702	0.551484	0.463338	0.844146	0.497496	0.0991737	0.551484	-0.45231	0.100473	0.00764795	S	2	___2	Casein kinase II substrate motif;PKA kinase substrate motif
-0.743949	NaN	NaN	-1.97509	NaN	NaN	NaN	-0.188179	-2.00397	-0.324645	-3.45591	-1.46176	NaN	-1.45988	NaN	-1.59893	-0.235314	-2.25415	NaN	-1.20739	-1.90798	-4.18896	NaN	NaN	NaN	NaN	NaN	NaN	NaN	-1.30452	-1.51272	0.272935	-0.2042	-1.92801	-1.44163	NaN	NaN	-1.16342	-0.934335	NaN	NaN	-1.53035	-1.23397	-0.296382	0.187833	0.140757	S	3	___1	14-3-3 domain binding motif;Akt kinase substrate motif;AMP-activated protein kinase 2 substrate motif;Calmodulin-dependent protein kinase II substrate motif;Casein kinase II substrate motif;MAPKAPK1 kinase substrate motif;p70 Ribosomal S6 kinase substrate motif;Phosphorylase kinase substrate motif;PKA kinase substrate motif;PKC epsilon kinase substrate motif;PKC kinase substrate motif
-1.89769	NaN	NaN	NaN	-1.37216	-2.49264	NaN	NaN	-1.96334	-1.34405	-0.893457	-1.36032	NaN	-2.00088	NaN	NaN	-1.31136	-1.41158	NaN	NaN	-1.1827	-2.59204	NaN	NaN	NaN	NaN	NaN	NaN	NaN	NaN	-2.11185	NaN	-1.81236	-2.43282	-1.64677	NaN	-1.81937	-1.3203	NaN	-2.39843	NaN	-1.39187	-1.81937	0.427494	0.121385	0.210624	S	2	___1	BARD1 BRCT domain binding motif;Casein kinase II substrate motif
1.73498	NaN	NaN	NaN	NaN	NaN	NaN	NaN	0.652016	NaN	NaN	1.58277	NaN	0.370146	NaN	1.88968	1.52433	NaN	NaN	1.40134	1.5539	NaN	0.756859	NaN	NaN	NaN	NaN	0.826395	NaN	1.3557	0.38662	0.971631	1.86156	NaN	1.37249	NaN	NaN	NaN	1.1472	NaN	2.06867	1.52433	1.25145	0.27288	0.247292	0.925005	S	3	___1	Casein kinase II substrate motif;ERK1,2 kinase substrate motif;G protein-coupled receptor kinase 1 substrate motif;GSK3 kinase substrate motif;GSK-3, ERK1, ERK2, CDK5 substrate motif;WW domain binding motif
NaN	NaN	NaN	NaN	NaN	2.49544	1.47298	1.55586	NaN	0.960858	NaN	NaN	NaN	NaN	NaN	1.40313	1.34204	NaN	NaN	1.55128	NaN	0.839076	NaN	NaN	NaN	NaN	NaN	NaN	NaN	1.14638	NaN	0.976175	NaN	2.17528	NaN	NaN	NaN	1.43162	0.889006	NaN	NaN	1.43805	1.14638	0.291669	0.229049	0.66963	S	3	___1	DNA dependent Protein kinase substrate motif;ERK1,2 kinase substrate motif;GSK-3, ERK1, ERK2, CDK5 substrate motif;WW domain binding motif
1.58134	1.24285	0.800484	2.11289	0.753437	2.02584	NaN	NaN	0.971227	0.698616	2.16964	1.96453	-0.596924	0.395455	2.04142	0.622905	NaN	1.22872	0.801545	1.55797	1.13106	1.07856	1.0847	0.977044	NaN	2.28334	NaN	0.108467	1.62372	1.10843	1.31615	1.17785	2.30813	2.21112	0.423105	1.84594	1.44296	1.75518	NaN	1.48326	2.17623	1.10788	1.48326	-0.375381	0.138962	0.325409	S	3	___1	ERK1,2 kinase substrate motif;G protein-coupled receptor kinase 1 substrate motif;Growth associated histone HI kinase substrate motif;GSK-3, ERK1, ERK2, CDK5 substrate motif;PKA kinase substrate motif;PKC kinase substrate motif;WW domain binding motif
2.11157	3.33371	2.62254	2.3429	NaN	3.15227	NaN	2.36548	NaN	2.80924	NaN	NaN	NaN	1.99327	NaN	2.6082	NaN	NaN	1.08542	2.69405	NaN	0.362707	-3.73693	NaN	NaN	2.7037	NaN	1.60137	NaN	1.83634	1.13606	2.26096	2.28326	3.00901	NaN	NaN	2.42046	2.09289	2.01639	NaN	NaN	2.48684	2.09289	0.393943	0.143928	0.724085	S	3	___1	14-3-3 domain binding motif;Aurora-A kinase substrate motif;Calmodulin-dependent protein kinase II substrate motif;DMPK1,2 kinase substrate motif;G protein-coupled receptor kinase 1 substrate motif;MAPKAPK2 kinase substrate motif;MDC1 BRCT domain binding motif;PAK2 kinase substrate motif;Phosphorylase kinase substrate motif;PKA kinase substrate motif;PKC epsilon kinase substrate motif;PKC kinase …
1.12866	0.576936	0.745473	0.321856	NaN	0.872977	-0.0464657	0.533974	0.911133	0.0937864	0.540368	0.69837	-0.462607	0.0284737	0.662599	0.878512	0.732099	0.169774	NaN	0.386318	0.54456	-0.234528	0.655541	NaN	NaN	0.126324	NaN	-0.187914	-0.367557	0.392476	0.327891	NaN	0.805157	1.04971	0.6838	NaN	0.804463	0.25645	0.0036282	0.623941	0.935017	0.542464	0.508209	0.0342555	0.478993	0.977646	S	2	___1	14-3-3 domain binding motif;Calmodulin-dependent protein kinase II substrate motif;ERK1,2 kinase substrate motif;G protein-coupled receptor kinase 1 substrate motif;GSK-3, ERK1, ERK2, CDK5 substrate motif;MAPKAPK2 kinase substrate motif;PKA kinase substrate motif;PKC kinase substrate motif;WW domain binding motif;ZIP kinase substrate motif
-1.44311	-1.79536	-0.584141	-1.56877	-2.54543	-2.6453	-3.39635	-1.64432	-1.41799	-2.90033	-1.81557	-2.35255	-3.31003	-2.10525	-1.91343	-1.4597	-1.15987	-0.88012	-3.24944	-1.71864	-3.71867	-1.24791	-2.94011	-2.19028	NaN	-1.40337	-2.61228	-1.75295	-3.13143	-2.20134	-2.49898	-1.107	-2.8832	-2.96836	-2.44354	-4.57886	-2.14763	-1.87593	-2.52388	-3.36604	-2.93687	-1.81557	-2.52388	0.708304	0.0202282	0.049366	S	2	___1	Casein kinase I substrate motif;Casein kinase II substrate motif;ERK1,2 kinase substrate motif;GSK-3, ERK1, ERK2, CDK5 substrate motif;WW domain binding motif
1.22975	1.16267	NaN	NaN	NaN	NaN	NaN	NaN	NaN	0.934884	NaN	0.721125	NaN	NaN	0.663947	1.02879	1.79451	NaN	NaN	0.827688	NaN	NaN	NaN	NaN	NaN	NaN	NaN	NaN	NaN	-0.961102	NaN	NaN	1.06026	-0.805934	NaN	NaN	1.03052	0.617527	NaN	NaN	0.238287	0.981839	0.427907	0.553932	0.0588195	0.0681266	S	2	___1	14-3-3 domain binding motif;ATM kinase substrate motif;Calmodulin-dependent protein kinase II substrate motif;Calmodulin-dependent protein kinase IV substrate motif;Casein kinase II substrate motif;Chk1 kinase substrate motif;DNA dependent Protein kinase substrate motif;PKA kinase substrate motif;PKC kinase substrate motif;ZIP kinase substrate motif
0.828954	0.8597	0.954089	-0.464066	-1.22928	0.803235	NaN	1.04379	1.3735	1.26316	NaN	0.816861	NaN	0.454578	0.0844775	0.553176	1.16051	-0.526201	NaN	0.0944821	-0.117407	NaN	-0.557832	1.32046	NaN	0.454408	NaN	1.1693	NaN	0.68274	0.604846	1.28916	-0.84913	-0.0378489	0.202148	NaN	0.103152	0.45084	0.937834	NaN	0.876521	0.678206	0.604846	0.0733597	0.477235	0.888614	S	2	___1	Casein kinase II substrate motif
0.596647	0.615412	1.61459	0.402585	-1.7359	0.766077	NaN	1.16108	-0.085873	1.02953	-2.12309	0.445793	NaN	0.583302	0.847269	0.278019	1.27423	-1.48681	NaN	0.10495	0.213249	-2.14422	-0.1418	0.725279	NaN	1.42146	-0.0788504	NaN	-1.72551	0.531497	1.1761	1.51726	1.08367	0.238646	0.106993	NaN	0.887914	0.474412	0.613782	NaN	NaN	0.514548	0.531497	-0.0169492	0.427901	0.499578	S	2	___1	14-3-3 domain binding motif;Aurora-A kinase substrate motif;Calmodulin-dependent protein kinase II substrate motif;MAPKAPK2 kinase substrate motif;PAK2 kinase substrate motif;Phosphorylase kinase substrate motif;PKA kinase substrate motif;PKC epsilon kinase substrate motif;PKC kinase substrate motif
0.578816	0.0876954	0.305206	-0.0571481	-1.43134	-0.525683	-0.681249	-0.834217	-0.082542	-0.245559	0.51039	-0.827139	-2.13418	-1.72598	-0.0552524	0.309241	0.869426	-0.595505	-0.405059	-0.457899	-0.229523	0.885527	-1.33533	0.589887	NaN	-0.799782	NaN	-0.431844	0.729641	2.21885	-1.37192	0.274147	-0.792786	-0.698154	-0.178222	0.214809	-0.169234	0.0954856	0.290267	0.545488	-0.0514846	-0.245559	0.0220005	-0.267559	0.20803	0.178424	S	2	___1	14-3-3 domain binding motif;b-Adrenergic Receptor kinase substrate motif;Calmodulin-dependent protein kinase II alpha substrate motif;Calmodulin-dependent protein kinase II substrate motif;Calmodulin-dependent protein kinase IV substrate motif;Casein kinase II substrate motif;Chk1 kinase substrate motif;G protein-coupled receptor kinase 1 substrate motif;Phosphorylase kinase substrate motif;PKA k…
NaN	NaN	NaN	NaN	NaN	NaN	NaN	NaN	NaN	0.878462	NaN	0.254168	NaN	0.185325	0.391333	NaN	NaN	NaN	NaN	0.252954	NaN	NaN	NaN	NaN	NaN	1.52702	NaN	NaN	NaN	NaN	NaN	0.859804	0.87177	0.233115	NaN	NaN	1.08496	0.318099	0.604492	NaN	NaN	0.32275	0.732148	-0.409398	0.120856	0.760293	S	3	___1	Calmodulin-dependent protein kinase II substrate motif;Casein kinase II substrate motif;Chk1 kinase substrate motif;PKA kinase substrate motif;PKC kinase substrate motif
-0.377812	-1.21042	NaN	NaN	NaN	NaN	-1.87433	NaN	NaN	-0.00703817	NaN	-0.139168	NaN	NaN	0.0936898	-1.81677	NaN	NaN	NaN	NaN	-1.42933	-0.940323	-0.855488	NaN	NaN	NaN	NaN	NaN	NaN	NaN	-0.784645	0.589508	NaN	0.0381982	NaN	NaN	-0.000543552	0.153788	NaN	NaN	0.10956	-0.897906	0.0738793	-0.971785	0.00482717	0.0101663	S	3	___2	b-Adrenergic Receptor kinase substrate motif
NaN	NaN	-0.760143	-0.405639	-1.36697	-0.42601	-1.87433	-0.1891	-0.451927	0.0843164	-0.526366	0.00197289	NaN	-0.965912	NaN	-1.56007	0.38004	-1.2006	-1.71125	-0.569386	-1.20655	NaN	-1.05361	-1.23708	-3.42719	-0.00943722	NaN	-0.832365	-1.55251	-0.220705	-0.734961	0.688858	-0.485297	0.11236	-1.7583	-1.24618	-0.0614545	0.142932	-1.21584	-0.735331	0.0741775	-0.760143	-0.610129	-0.150014	0.302559	0.240235	S	3	___2	Casein kinase II substrate motif;G protein-coupled receptor kinase 1 substrate motif;MDC1 BRCT domain binding motif;Plk1 PBD domain binding motif;Pyruvate dehydrogenase kinase substrate motif
-0.377812	-1.21042	0.0965174	1.28128	NaN	-0.412998	NaN	NaN	-0.451927	0.0843164	NaN	0.00197289	NaN	NaN	NaN	0.61264	0.596255	0.0211949	-1.40042	-0.545522	NaN	-0.773115	-0.0808655	-1.23708	NaN	NaN	NaN	NaN	-1.55251	0.456682	-0.784645	0.599689	-0.485297	0.280972	0.378224	-0.94339	-0.000543552	0.142932	-1.09696	-0.55725	0.0537646	-0.229339	-0.000543552	-0.228795	0.237123	0.901555	S	3	___2	ERK1,2 kinase substrate motif;G protein-coupled receptor kinase 1 substrate motif;GSK3 kinase substrate motif;GSK-3, ERK1, ERK2, CDK5 substrate motif;MAPKAPK2 kinase substrate motif;PKA kinase substrate motif;PKC kinase substrate motif;WW domain binding motif
1.01424	NaN	0.756038	1.35931	NaN	0.133327	NaN	NaN	NaN	0.279741	0.812353	NaN	NaN	NaN	NaN	0.61264	0.770516	0.140514	NaN	0.444676	-0.813481	0.805009	0.112363	NaN	NaN	NaN	NaN	NaN	1.60998	0.99779	-0.238624	NaN	1.74948	0.508567	0.385763	NaN	0.832745	0.970849	0.873686	NaN	0.0537646	0.61264	0.853215	-0.240576	0.228053	0.27469	S	3	___2	Casein kinase II substrate motif;ERK1,2 kinase substrate motif;Growth associated histone HI kinase substrate motif;GSK-3, ERK1, ERK2, CDK5 substrate motif;MAPKAPK2 kinase substrate motif;PKA kinase substrate motif;PKC kinase substrate motif;Pyruvate dehydrogenase kinase substrate motif;WW domain binding motif
-1.20583	NaN	-1.30306	-1.90333	NaN	-1.02924	NaN	NaN	NaN	-0.556438	-2.24601	-1.19027	NaN	-1.23821	NaN	-2.08599	NaN	NaN	NaN	NaN	NaN	-1.50853	NaN	NaN	NaN	-0.639363	NaN	-1.23823	NaN	-0.961348	-1.20552	NaN	-1.47095	NaN	-2.26407	-2.36365	NaN	NaN	NaN	NaN	-0.723488	-1.23821	-1.23823	1.5378e-05	0.444737	0.720466	S	3	___3	b-Adrenergic Receptor kinase substrate motif
-1.20583	NaN	-1.30306	-1.90333	NaN	-1.02924	NaN	NaN	NaN	-0.556438	-2.24601	-1.19027	NaN	-1.23821	NaN	-2.08599	NaN	NaN	NaN	NaN	NaN	-1.50853	NaN	NaN	NaN	-0.639363	NaN	-1.23823	NaN	-0.961348	NaN	NaN	-1.47095	NaN	-2.26407	-2.36365	NaN	NaN	NaN	NaN	-0.723488	-1.23821	-1.35459	0.116376	0.423853	0.655691	S	3	___3	Casein kinase II substrate motif;G protein-coupled receptor kinase 1 substrate motif;MDC1 BRCT domain binding motif;Plk1 PBD domain binding motif;Pyruvate dehydrogenase kinase substrate motif
1.91868	1.7727	1.45416	1.48639	-0.0576771	2.34214	1.0984	2.29547	1.06464	2.02305	0.514818	1.48589	-0.34307	0.988409	1.90509	2.07832	1.78985	0.0929855	0.868999	1.29959	1.75305	0.631253	2.32168	2.48817	NaN	1.75983	2.18765	0.853259	1.15958	1.54324	2.31759	1.63677	1.77968	1.92441	1.69408	0.792242	1.76071	1.72191	1.85463	1.66216	1.47961	1.48639	1.69408	-0.207695	0.253853	0.248951	S	3	___1	14-3-3 domain binding motif;b-Adrenergic Receptor kinase substrate motif;Calmodulin-dependent protein kinase II substrate motif;Phosphorylase kinase substrate motif;PKA kinase substrate motif;PKC epsilon kinase substrate motif;PKC kinase substrate motif
1.12873	0.933338	1.0484	0.637982	-0.472779	1.38424	-0.0501662	1.37239	0.126709	1.46315	-0.165947	0.442988	-1.1876	0.279436	1.11606	1.30277	0.873778	-0.51582	-0.170689	0.373035	0.908391	-0.0218374	0.95126	1.13528	NaN	1.16118	0.934253	0.303402	1.05144	1.00175	1.20217	1.01893	1.20831	1.16368	0.576546	0.207285	0.913879	1.13347	1.29835	0.988652	0.333421	0.873778	1.00175	-0.127973	0.322217	0.0615893	S	3	___1	14-3-3 domain binding motif;BARD1 BRCT domain binding motif;Calmodulin-dependent protein kinase II substrate motif;Casein kinase II substrate motif;DNA dependent Protein kinase substrate motif;G protein-coupled receptor kinase 1 substrate motif;PKA kinase substrate motif;PKC epsilon kinase substrate motif;PKC kinase substrate motif
0.905243	0.2297	0.163818	0.374433	NaN	0.615195	0.0587211	0.506838	0.0687203	NaN	-0.445231	-0.0293794	NaN	-0.662954	0.381173	0.709043	0.0852801	-0.321965	-0.0444842	0.138602	-0.373623	NaN	-0.20879	0.920544	NaN	NaN	-0.138407	-0.425378	0.487533	0.522089	0.454781	0.0916412	0.0527581	0.117598	-0.148964	-0.0890191	0.396863	0.6174	0.460635	NaN	0.315657	0.111941	0.216628	-0.104686	0.343538	0.756999	S	2	___1	14-3-3 domain binding motif;Calmodulin-dependent protein kinase II substrate motif;ERK1,2 kinase substrate motif;Growth associated histone HI kinase substrate motif;GSK-3, ERK1, ERK2, CDK5 substrate motif;PKA kinase substrate motif;PKC kinase substrate motif;WW domain binding motif
NaN	NaN	NaN	-0.359399	NaN	-0.737429	NaN	-0.464171	NaN	-0.408976	-1.43182	-0.662171	NaN	-1.15661	NaN	0.134263	NaN	NaN	NaN	NaN	NaN	NaN	NaN	-0.34752	NaN	NaN	NaN	NaN	0.382706	0.263518	NaN	0.329497	NaN	-1.7831	-0.985635	NaN	NaN	-0.496845	0.370409	NaN	NaN	-0.464171	0.263518	-0.727689	0.0242573	0.380421	S	2	___1	14-3-3 domain binding motif;BARD1 BRCT domain binding motif;Calmodulin-dependent protein kinase II substrate motif;Casein kinase II substrate motif;DNA dependent Protein kinase substrate motif;PKA kinase substrate motif;PKA, PKG kinase substrate motif;PKC epsilon kinase substrate motif;PKC kinase substrate motif;PKG kinase substrate motif
-2.1081	NaN	NaN	-2.98011	-2.36469	-4.0564	NaN	NaN	-3.26162	NaN	NaN	-2.16818	NaN	-2.56756	-4.0304	-2.99999	-4.57937	NaN	NaN	NaN	-2.90692	NaN	NaN	NaN	NaN	-4.82013	NaN	NaN	NaN	-3.57242	-3.78556	NaN	-1.76191	-3.45327	-2.04377	NaN	NaN	-3.02087	-3.35689	NaN	-3.75465	-2.99005	-3.40508	0.415026	0.129453	0.713398	S	3	___1	Cdc2 kinase substrate motif;CDK kinase substrate motif;CDK1,2,4,6 kinase substrate motif;ERK1, ERK2, SAPK, CDK5 and GSK3 kinase substrate motif;ERK1,2 kinase substrate motif;Growth associated histone HI kinase substrate motif;GSK-3, ERK1, ERK2, CDK5 substrate motif;WW domain binding motif
0.757488	0.725658	0.038751	0.486147	-0.50253	0.951398	0.711688	0.0653417	-0.372439	0.878747	0.347776	0.612348	-0.861891	-0.439226	0.773224	0.526442	0.319572	-0.362609	0.885271	0.560019	0.322403	0.554119	0.215138	1.49076	-0.998742	0.186034	NaN	-0.0763047	0.779811	0.567138	0.253147	0.367147	0.542867	1.31078	0.481789	1.25609	0.633632	0.829897	0.844697	0.996128	0.629747	0.416961	0.63169	-0.214729	0.248209	0.0212779	S	2	___1	MAPKAPK2 kinase substrate motif;PKA kinase substrate motif;PKC kinase substrate motif
0.183747	NaN	NaN	-0.342765	1.34323	0.747534	NaN	0.1641	0.283483	0.442277	0.0281771	1.47651	NaN	1.88953	-0.616554	0.152806	-0.699528	1.91488	NaN	0.499891	1.12395	0.54326	0.519913	1.46218	NaN	NaN	NaN	1.14873	-0.0777078	-0.145547	1.32315	NaN	-0.308559	0.727124	1.24098	1.69768	0.0243118	-1.34625	0.254781	0.218251	-0.0507544	0.499891	0.218251	0.28164	0.238692	0.452353	S	2	___1	Casein kinase II substrate motif;G protein-coupled receptor kinase 1 substrate motif;GSK3 kinase substrate motif;PKA kinase substrate motif;PKC kinase substrate motif
0.130782	-0.351827	-0.486486	0.415983	0.456215	-0.228252	0.780948	0.265706	1.38602	1.6524	1.06046	0.495204	-0.427871	0.980171	0.285397	0.200645	0.0020511	0.366038	-0.433608	-0.0849532	0.73022	0.645834	0.745015	NaN	NaN	0.515817	NaN	0.946276	0.250645	0.179794	0.683137	NaN	0.468829	0.526703	0.736481	0.701139	0.46178	0.0219049	-0.0429179	0.464801	0.591959	0.391011	0.468829	-0.0778183	0.368769	0.567123	S	2	___1	14-3-3 domain binding motif;AMP-activated protein kinase substrate motif;Calmodulin-dependent protein kinase II substrate motif;Casein kinase II substrate motif;DNA dependent Protein kinase substrate motif;ERK1,2 kinase substrate motif;GSK-3, ERK1, ERK2, CDK5 substrate motif;HMGCoA Reductase kinase substrate motif;PKA kinase substrate motif;PKC kinase substrate motif;WW domain binding motif
0.34759	0.366597	NaN	NaN	NaN	NaN	NaN	NaN	0.35057	NaN	NaN	NaN	NaN	1.14053	NaN	0.161884	-0.0627372	NaN	NaN	NaN	0.936865	0.111812	-0.19984	NaN	NaN	NaN	NaN	NaN	NaN	NaN	0.750405	NaN	-0.217653	-1.48938	NaN	NaN	0.031761	NaN	-0.0985356	NaN	NaN	0.34759	-0.0985356	0.446125	0.109997	0.211381	S	3	___1	ERK1,2 kinase substrate motif;G protein-coupled receptor kinase 1 substrate motif;Growth associated histone HI kinase substrate motif;GSK-3, ERK1, ERK2, CDK5 substrate motif;PKA kinase substrate motif;PKC kinase substrate motif;WW domain binding motif
NaN	NaN	NaN	NaN	NaN	NaN	NaN	NaN	0.652484	NaN	0.828626	NaN	NaN	0.932259	NaN	NaN	0.58587	0.751413	NaN	NaN	0.893949	1.27825	-0.449519	NaN	NaN	NaN	NaN	NaN	1.0112	0.9739	0.532955	NaN	NaN	1.04984	0.601265	NaN	NaN	NaN	NaN	NaN	NaN	0.790019	0.9739	-0.18388	0.273455	0.490396	S	4	___1	ERK1,2 kinase substrate motif;GSK-3, ERK1, ERK2, CDK5 substrate motif;MAPKAPK2 kinase substrate motif;WW domain binding motif
0.210395	0.213375	0.431356	0.160575	-0.202953	0.419181	-0.0438559	0.178475	0.549002	0.108267	0.345674	0.168898	0.500223	0.861378	0.0879284	0.450276	0.0344251	0.160163	-0.290337	0.483985	0.539665	0.22464	0.0990933	0.669896	NaN	0.201862	NaN	0.560638	0.384701	0.237177	0.191575	-0.302364	0.0695423	0.47565	-0.93248	1.02562	0.105042	-0.00146807	-0.0982995	0.281106	0.436742	0.210395	0.214376	-0.00398042	0.440761	0.510612	S	3	___1	Casein kinase II substrate motif;ERK1,2 kinase substrate motif;G protein-coupled receptor kinase 1 substrate motif;GSK3 kinase substrate motif;GSK-3, ERK1, ERK2, CDK5 substrate motif;WW domain binding motif
0.535556	1.27667	0.251405	-0.437973	-0.0876215	0.441701	-0.385562	0.103739	0.30002	0.779111	0.916043	0.587487	NaN	-0.144061	0.647183	1.03329	0.162397	0.709778	NaN	0.0197611	-0.0456525	0.86881	0.104811	NaN	NaN	0.483131	NaN	1.09874	0.561758	0.274151	-0.0589341	0.0337324	0.74704	-0.171347	0.319993	NaN	0.176215	0.0225145	0.523471	0.648213	0.200816	0.370861	0.274151	0.0967097	0.448145	0.819228	S	3	___1	14-3-3 domain binding motif;Calmodulin-dependent protein kinase II alpha substrate motif;Calmodulin-dependent protein kinase II substrate motif;Calmodulin-dependent protein kinase IV substrate motif;Chk1 kinase substrate motif;MAPKAPK2 kinase substrate motif;Phosphorylase kinase substrate motif;PKA kinase substrate motif;PKC kinase substrate motif
NaN	1.65635	1.00296	0.668532	0.819942	-1.19189	1.52433	0.990946	-0.235572	0.726037	1.13645	NaN	0.867298	-0.41309	-0.141344	1.54779	-0.296876	-1.2235	NaN	1.03968	-1.76114	0.813529	0.988441	NaN	NaN	-0.43623	NaN	-0.102689	0.0879451	0.598691	-1.81995	0.369267	0.486919	1.36986	1.10761	2.12972	0.187294	0.415667	NaN	0.471343	0.66467	0.813529	0.471343	0.342186	0.183937	0.824163	S	2	___2	14-3-3 domain binding motif;AMP-activated protein kinase substrate motif;Calmodulin-dependent protein kinase II substrate motif;Casein kinase II substrate motif;DNA dependent Protein kinase substrate motif;ERK1,2 kinase substrate motif;GSK-3, ERK1, ERK2, CDK5 substrate motif;HMGCoA Reductase kinase substrate motif;PKA kinase substrate motif;PKC kinase substrate motif;WW domain binding motif
NaN	1.65635	1.00296	0.668532	0.819942	-1.19189	1.52433	0.990946	-0.235572	0.726037	1.13645	NaN	0.867298	-0.41309	-0.141344	1.54779	-0.296876	-1.2235	NaN	1.03968	-1.76114	0.813529	0.988441	NaN	NaN	-0.43623	NaN	-0.102689	0.0879451	0.598691	-1.81995	0.369267	0.486919	1.36986	1.10761	2.04496	0.187294	0.415667	NaN	0.471343	0.66467	0.813529	0.471343	0.342186	0.183937	0.838091	S	3	___2	Casein kinase II substrate motif;ERK1,2 kinase substrate motif;GSK-3, ERK1, ERK2, CDK5 substrate motif;MAPKAPK2 kinase substrate motif;WW domain binding motif
NaN	NaN	NaN	NaN	3.02804	1.00939	NaN	NaN	1.86715	NaN	2.27401	1.55945	NaN	2.9874	1.1014	1.02329	NaN	3.72523	NaN	NaN	1.65322	1.70457	NaN	1.5834	NaN	2.80256	NaN	2.60636	0.38318	NaN	1.91842	NaN	NaN	NaN	1.6961	NaN	0.824181	NaN	1.09027	NaN	2.05507	1.70457	1.6961	0.00847471	0.453172	0.197695	S	2	___1	14-3-3 domain binding motif;Calmodulin-dependent protein kinase I substrate motif;Calmodulin-dependent protein kinase II substrate motif;Calmodulin-dependent protein kinase IV substrate motif;Casein kinase II substrate motif;Chk1 kinase substrate motif;DNA dependent Protein kinase substrate motif;ERK1,2 kinase substrate motif;GSK-3, ERK1, ERK2, CDK5 substrate motif;MAPKAPK2 kinase substrate motif…
-1.19841	1.08949	0.593253	0.763963	1.95229	0.78339	0.658918	1.4006	NaN	-0.933466	0.455047	1.25886	NaN	2.01558	-0.319033	0.0840275	-1.42423	2.6957	0.609318	0.617936	0.865111	0.180965	0.976342	0.665362	NaN	1.88786	NaN	NaN	-0.977968	-0.556201	1.46371	NaN	-1.24504	-0.78106	0.193542	NaN	NaN	-0.264413	NaN	NaN	1.85256	0.665362	-0.410307	1.07567	0.000683413	0.140751	S	2	___1	Casein kinase II substrate motif;Cdc2 kinase substrate motif;CDK kinase substrate motif;CDK1,2,4,6 kinase substrate motif;ERK1,2 kinase substrate motif;G protein-coupled receptor kinase 1 substrate motif;GSK3 kinase substrate motif;GSK-3, ERK1, ERK2, CDK5 substrate motif;PKA kinase substrate motif;PKC kinase substrate motif;WW domain binding motif
-0.904898	-1.51167	-2.3504	NaN	-2.50833	NaN	NaN	NaN	-1.53037	-1.39941	-0.89491	-1.91687	NaN	-1.61304	-1.3698	-1.60861	-1.18387	NaN	-2.75297	-2.36279	-1.61411	-1.45167	-1.50039	NaN	NaN	NaN	NaN	-0.917821	-1.37239	-1.12891	-1.18517	-2.87407	-1.1128	-0.42434	-1.65357	NaN	-1.03746	-0.856393	NaN	-0.110208	-1.40741	-1.53037	-1.12086	-0.409514	0.120798	0.0458537	S	3	___1	Casein kinase I substrate motif;Casein kinase II substrate motif;Pyruvate dehydrogenase kinase substrate motif
-0.756825	-1.1303	-1.59762	-2.1885	-1.65881	-0.442112	-0.76151	-2.28863	-1.34165	-1.16503	-0.790919	-1.4104	-1.70165	-1.32618	-0.757019	-1.01829	-0.820523	-1.94182	-1.18644	-2.08331	-1.11997	-1.21744	-1.39021	-1.91713	NaN	-2.11723	NaN	-1.2605	-0.489284	-0.258354	-1.2438	-1.68395	-1.1882	-0.139647	-1.2459	-0.486074	-1.04707	-0.880123	-1.19049	NaN	-0.521745	-1.32618	-1.04707	-0.279113	0.199785	0.00879607	S	3	___2	ERK1,2 kinase substrate motif;G protein-coupled receptor kinase 1 substrate motif;GSK3 kinase substrate motif;GSK-3, ERK1, ERK2, CDK5 substrate motif;WW domain binding motif
-0.736573	-1.01582	-1.59762	-2.33641	-1.77303	-0.442112	-1.14915	-2.36577	-1.18681	NaN	-0.528221	-1.26777	NaN	-1.25632	-0.757019	-0.80755	NaN	-1.94182	NaN	-2.08331	-0.906602	-1.24135	-1.10494	NaN	NaN	-2.11723	NaN	-1.09809	-0.720819	-0.78213	-1.04203	-1.7052	-0.83699	0.193612	NaN	-0.486074	NaN	-0.859374	-1.0478	NaN	-0.521745	-1.21408	-0.83699	-0.37709	0.138011	0.0126444	S	3	___2	G protein-coupled receptor kinase 1 substrate motif;MAPKAPK2 kinase substrate motif
-1.0531	-1.24479	NaN	-2.04063	-1.54459	-1.10206	-0.373897	-2.21147	-1.49646	-1.16503	-1.0536	-1.55302	-1.70165	-1.39602	-1.56642	-1.22894	-0.820523	NaN	-1.18644	NaN	-1.33339	-1.19357	-1.67548	-1.91713	NaN	-1.62962	NaN	-1.42295	-0.257698	0.185213	-1.44561	-1.66271	-1.53942	-0.495697	-1.2459	NaN	-1.04707	-1.26461	-1.33321	NaN	-1.08443	-1.3647	-1.25525	-0.10945	0.339133	0.0888269	S	3	___2	BARD1 BRCT domain binding motif;Casein kinase II substrate motif;G protein-coupled receptor kinase 1 substrate motif
-0.538224	0.118293	0.0124099	-1.22139	NaN	0.127535	NaN	-0.745188	0.15016	NaN	-0.037041	0.38816	-0.688277	NaN	-0.648185	0.504939	NaN	NaN	-0.283906	-0.331293	1.58527	-0.02771	NaN	NaN	NaN	-0.914938	-0.102233	0.0589706	-0.395411	NaN	0.13484	NaN	-0.291152	-0.0631776	0.622576	0.0106526	-0.303305	-0.192759	NaN	-0.494125	0.143262	-0.037041	-0.0827054	0.0456645	0.490454	0.672938	S	2	___1	Casein kinase II substrate motif;Cdc2 kinase substrate motif;CDK kinase substrate motif;CDK1,2,4,6 kinase substrate motif;ERK1,2 kinase substrate motif;Growth associated histone HI kinase substrate motif;GSK-3, ERK1, ERK2, CDK5 substrate motif;MDC1 BRCT domain binding motif;Plk1 PBD domain binding motif;WW domain binding motif
1.66797	3.09941	NaN	1.05115	NaN	2.18973	1.65517	2.11858	0.825318	NaN	2.45906	1.85027	NaN	1.23857	1.55953	2.35032	0.936874	1.7577	2.5407	1.90994	2.32789	1.87874	2.04517	NaN	NaN	NaN	NaN	3.19654	2.01916	1.59128	1.93625	1.53764	0.701067	0.836981	2.59807	2.69603	1.32223	0.866003	1.80769	1.9508	2.3839	1.87874	1.87197	0.00676167	0.451462	0.839615	S	3	___1	14-3-3 domain binding motif;AMP-activated protein kinase substrate motif;Calmodulin-dependent protein kinase II substrate motif;HMGCoA Reductase kinase substrate motif;MAPKAPK1 kinase substrate motif;PAK2 kinase substrate motif;PKA kinase substrate motif;PKC epsilon kinase substrate motif;PKC kinase substrate motif
0.0490104	0.414372	0.125219	-0.113977	0.346712	0.437082	2.41345	0.42162	0.396015	0.150059	-0.0831458	0.785299	1.47175	1.00813	-0.165338	-0.00951519	-0.88865	0.330068	NaN	0.286736	0.533184	0.131199	0.357267	0.274533	NaN	-0.312678	NaN	0.571317	-0.000341867	-0.356734	0.811277	-0.578202	-0.322009	0.257611	0.582395	0.691096	-0.195022	-0.375768	0.138884	0.109463	0.173709	0.308402	0.124174	0.184229	0.34277	0.176937	S	2	___2	Casein kinase I substrate motif;Casein kinase II substrate motif;G protein-coupled receptor kinase 1 substrate motif
0.0490104	0.414372	0.125219	-0.113977	0.346712	0.437082	2.41345	0.42162	0.396015	0.150059	-0.0831458	0.785299	1.47175	1.00813	-0.165338	-0.00951519	-0.88865	0.330068	NaN	0.286736	0.533184	0.131199	0.357267	0.274533	NaN	-0.312678	NaN	0.571317	-0.000341867	-0.356734	0.811277	-0.578202	-0.322009	0.257611	0.582395	0.691096	-0.195022	-0.375768	0.138884	0.109463	0.173709	0.308402	0.124174	0.184229	0.34277	0.176937	T	3	___2	b-Adrenergic Receptor kinase substrate motif;Casein kinase II substrate motif;Dual specificity protein phosphatase 6 substrate motif;PP2C delta substrate motif
NaN	-0.659611	1.60629	NaN	NaN	NaN	1.5869	NaN	NaN	NaN	0.0230306	NaN	NaN	-0.594625	NaN	1.47528	NaN	NaN	NaN	0.357602	NaN	NaN	1.7595	NaN	NaN	1.85023	NaN	NaN	NaN	NaN	NaN	0.280314	0.0416348	NaN	1.81458	-2.62939	NaN	0.4215	NaN	NaN	NaN	1.47528	0.280314	1.19497	0.000174552	0.33749	S	3	___2	ERK1,2 kinase substrate motif;G protein-coupled receptor kinase 1 substrate motif;Growth associated histone HI kinase substrate motif;GSK-3, ERK1, ERK2, CDK5 substrate motif;PKA kinase substrate motif;PKC kinase substrate motif;WW domain binding motif
-0.786046	-0.143303	-0.943472	-0.223118	0.0743576	-0.138481	-0.25449	-0.367233	-1.1056	-0.87676	-0.696799	-0.869072	-0.30831	0.743755	-0.872271	-0.692558	-1.13497	-0.196403	NaN	-0.344735	0.098905	-0.654499	-0.803728	0.142442	NaN	-0.282578	-0.661684	0.0340948	-0.902491	-1.08663	-0.0145521	-0.52151	-1.50888	-0.352233	-0.43807	-0.186089	-1.60787	-1.90625	-1.05672	-1.59761	NaN	-0.355984	-0.782087	0.426103	0.122266	0.0518941	S	2	___1	Casein kinase II substrate motif
0.877686	0.612948	0.501012	1.00062	2.6707	1.19999	1.11358	0.713715	0.58263	0.0444046	0.913149	0.588748	1.48528	1.0935	0.982292	1.20045	-0.332238	1.68536	-0.292952	0.898804	1.50223	0.89097	1.59495	0.811168	NaN	1.16274	NaN	1.05909	0.515628	0.396757	-0.461736	0.810704	-0.0780948	0.766326	1.44339	0.67574	0.296165	0.302901	0.258278	0.491735	1.05292	0.913149	0.503682	0.409467	0.133168	0.0330693	S	2	___1	AMP-activated protein kinase substrate motif
0.183762	0.438702	-0.0409476	1.18432	2.08438	0.898348	0.503908	0.801006	0.500228	-0.132194	0.415426	0.167277	NaN	0.532049	0.414552	0.468168	-0.405539	0.781961	1.10914	0.462654	1.05507	1.28696	0.915892	NaN	NaN	0.160921	NaN	0.589488	0.217721	-0.101574	-0.592618	0.299642	-0.398722	0.788194	1.10955	1.34138	0.0383586	0.181551	0.227866	NaN	0.749454	0.500228	0.227866	0.272363	0.247805	0.193316	S	2	___1	AMP-activated protein kinase substrate motif;Casein kinase II substrate motif;Pyruvate dehydrogenase kinase substrate motif
2.10147	2.2822	3.30583	1.32653	NaN	NaN	NaN	2.19441	NaN	2.24496	NaN	1.73144	NaN	2.01422	2.01473	1.68916	1.55533	NaN	NaN	1.12014	2.39584	NaN	NaN	2.20129	NaN	2.28228	NaN	NaN	NaN	1.06957	2.73533	2.95959	NaN	1.44403	2.30858	NaN	1.45182	NaN	1.69302	NaN	NaN	2.10147	1.69302	0.408454	0.133853	0.800384	S	2	___1	14-3-3 domain binding motif;Calmodulin-dependent protein kinase II substrate motif;DNA dependent Protein kinase substrate motif;G protein-coupled receptor kinase 1 substrate motif;GSK3 kinase substrate motif;Phosphorylase kinase substrate motif;PKA kinase substrate motif;PKC epsilon kinase substrate motif;PKC kinase substrate motif
1.04006	1.25548	0.478554	1.88248	1.42075	1.37186	NaN	2.20484	1.39463	0.0274409	1.77236	1.50796	NaN	1.28971	1.74548	1.32672	1.05875	0.387541	NaN	1.35527	0.678159	1.07238	1.11713	NaN	NaN	2.34149	1.78917	NaN	0.660477	1.46098	0.872877	1.70242	0.384546	1.17396	0.829265	0.35333	1.41066	1.32327	1.37387	NaN	1.40997	1.32672	1.32327	0.00345016	0.448159	0.447725	S	3	___1	ERK1,2 kinase substrate motif;GSK-3, ERK1, ERK2, CDK5 substrate motif;WW domain binding motif
0.614795	0.0599794	NaN	1.52367	-1.37886	1.03772	-0.0372407	-0.683911	-2.11359	0.991275	-0.0738648	NaN	-1.00078	NaN	0.155481	0.494536	1.11262	-1.00295	NaN	0.685695	-0.3768	NaN	-0.560973	NaN	NaN	-0.235002	NaN	-0.829534	1.19222	0.74002	-0.967653	NaN	0.906473	NaN	-1.45844	1.88576	0.410478	0.901015	1.00113	0.95994	0.735842	-0.0372407	0.820517	-0.857758	0.0107067	0.181901	S	3	___2	14-3-3 domain binding motif;Calmodulin-dependent protein kinase II substrate motif;G protein-coupled receptor kinase 1 substrate motif;GSK3 kinase substrate motif;PKA kinase substrate motif;PKC kinase substrate motif
0.627495	0.0599794	NaN	1.61554	-1.37886	0.794588	-0.0372407	-0.683911	-2.11359	0.991275	-0.0144175	-0.998257	-1.00078	NaN	0.262109	0.494536	1.26932	-0.808739	NaN	0.844407	-0.3768	-0.23653	-0.204835	1.20732	NaN	-0.235002	0.0962839	-0.829534	1.20276	0.74002	-0.967653	NaN	1.16366	0.908673	-1.45844	1.99739	0.43298	0.901015	0.947912	0.95994	0.818046	-0.0258291	0.85953	-0.885359	0.00888993	0.143535	S	2	___2	Casein kinase I substrate motif;DNA dependent Protein kinase substrate motif;ERK1,2 kinase substrate motif;GSK-3, ERK1, ERK2, CDK5 substrate motif;MAPKAPK2 kinase substrate motif;WW domain binding motif
0.191245	0.435371	0.349715	0.522507	0.793659	0.479494	0.425057	0.668018	0.938703	-0.260693	0.586528	0.594729	1.02124	0.981745	0.200629	0.490989	-0.103707	0.691873	0.439853	0.230942	0.883771	0.298661	0.571718	0.708825	NaN	0.616388	1.10511	0.725523	0.0726269	0.0782265	0.595047	0.184356	-0.327674	0.173189	0.639793	0.483263	0.192825	-0.0913044	0.0625205	NaN	0.510248	0.522507	0.18859	0.333916	0.190917	0.112701	S	2	___1	ERK1,2 kinase substrate motif;Growth associated histone HI kinase substrate motif;GSK-3, ERK1, ERK2, CDK5 substrate motif;PKA kinase substrate motif;PKC kinase substrate motif;WW domain binding motif
NaN	0.667672	NaN	-0.217076	NaN	1.01342	NaN	0.647556	0.136307	0.282132	0.758318	0.529445	0.0103095	NaN	0.649311	0.585804	0.237751	NaN	NaN	0.0199765	0.682954	0.890518	1.19774	NaN	NaN	0.845198	NaN	NaN	0.775294	0.558778	0.956606	0.660767	NaN	0.612917	0.683123	NaN	0.245838	0.587499	NaN	NaN	NaN	0.647556	0.636842	0.0107139	0.455408	0.365407	S	2	___1	14-3-3 domain binding motif;Calmodulin-dependent protein kinase II alpha substrate motif;Calmodulin-dependent protein kinase II substrate motif;Calmodulin-dependent protein kinase IV substrate motif;Casein kinase II substrate motif;Chk1 kinase substrate motif;MDC1 BRCT domain binding motif;Phosphorylase kinase substrate motif;Pim1 kinase substrate sequence;PKA kinase substrate motif;PKC epsilon k…
NaN	NaN	NaN	-0.101013	NaN	0.355158	NaN	NaN	NaN	NaN	0.924177	0.358817	NaN	0.841452	0.285983	0.0176267	0.204414	0.444108	NaN	NaN	0.540168	0.739259	0.65073	NaN	1.02042	NaN	NaN	NaN	NaN	0.124845	NaN	NaN	0.225394	0.641235	0.295937	NaN	0.161031	0.21709	NaN	NaN	NaN	0.444108	0.221242	0.222866	0.299398	0.111711	S	3	___2	Casein kinase II substrate motif;DNA dependent Protein kinase substrate motif;ERK1,2 kinase substrate motif;G protein-coupled receptor kinase 1 substrate motif;GSK-3, ERK1, ERK2, CDK5 substrate motif;PKA kinase substrate motif;PKC kinase substrate motif;WW domain binding motif
NaN	NaN	NaN	0.148004	NaN	-0.51273	NaN	NaN	NaN	-0.50812	NaN	0.0234993	NaN	-0.102913	NaN	-0.127555	-0.15173	0.567821	NaN	NaN	0.27438	-0.554241	-0.269176	NaN	NaN	0.295747	NaN	-0.520307	NaN	NaN	-0.197118	NaN	-0.635432	-0.725849	-0.0105017	NaN	NaN	NaN	NaN	NaN	NaN	-0.115234	-0.520307	0.405073	0.136156	0.0760379	S	4	___1	b-Adrenergic Receptor kinase substrate motif;Casein kinase II substrate motif
NaN	NaN	NaN	NaN	NaN	0.605027	NaN	0.946089	NaN	NaN	0.729217	NaN	NaN	0.0677119	-1.24728	NaN	NaN	NaN	-1.09879	NaN	NaN	1.64889	1.62466	NaN	NaN	NaN	NaN	1.74256	NaN	0.568485	0.827421	1.25761	NaN	NaN	0.656805	NaN	-0.572191	-0.384933	NaN	NaN	NaN	0.667122	0.656805	0.0103175	0.455012	0.731925	S	2	___1	ATM kinase substrate motif;Casein kinase II substrate motif;DNA dependent Protein kinase substrate motif;PKA kinase substrate motif;PKC kinase substrate motif
-3.14212	NaN	NaN	-4.60301	-1.82214	-3.16412	NaN	-4.28924	-2.5327	NaN	-0.517059	-2.00869	NaN	-1.74742	-3.56561	-2.61498	-3.68686	-4.09011	-2.48895	-3.9884	-1.99252	-1.75824	-2.33168	-2.60891	NaN	-4.29065	NaN	-2.14065	-3.97396	-3.92047	-2.79718	-2.65687	-2.37053	-2.89566	-1.54528	NaN	-3.38279	-3.33106	-3.69033	NaN	-2.61835	-2.61194	-2.84642	0.234473	0.286873	0.803219	S	3	___1	Cdc2 kinase substrate motif;CDK kinase substrate motif;CDK1,2,4,6 kinase substrate motif;ERK1,2 kinase substrate motif;G protein-coupled receptor kinase 1 substrate motif;GSK-3, ERK1, ERK2, CDK5 substrate motif;MAPKAPK2 kinase substrate motif;WW domain binding motif
-3.90766	NaN	NaN	NaN	-2.09994	-2.84775	NaN	-2.7265	-2.84655	-1.92049	-0.787901	-2.28346	NaN	-2.18653	NaN	NaN	NaN	NaN	-1.04444	-4.27567	-2.36411	NaN	NaN	NaN	NaN	-5.36436	-3.90338	-2.74119	NaN	-5.1803	NaN	NaN	NaN	-4.16161	-1.9769	NaN	NaN	NaN	-3.79623	-5.53445	-3.19022	-2.36411	-3.8498	1.48569	3.59654e-06	0.0525957	S	2	___1	ERK1,2 kinase substrate motif;Growth associated histone HI kinase substrate motif;GSK-3, ERK1, ERK2, CDK5 substrate motif;WW domain binding motif
-0.630439	NaN	NaN	NaN	NaN	NaN	NaN	-1.03363	NaN	NaN	-0.0534303	-1.11104	-0.594254	0.590654	NaN	NaN	NaN	NaN	NaN	NaN	NaN	-0.681628	NaN	NaN	NaN	NaN	NaN	NaN	NaN	-1.07642	0.401953	NaN	NaN	-1.84652	-0.114191	-0.22704	-0.652182	-0.91873	NaN	NaN	-1.09478	-0.630439	-0.785456	0.155017	0.377037	0.581188	S	3	___1	Cdc2 kinase substrate motif;CDK kinase substrate motif;CDK1,2,4,6 kinase substrate motif;ERK1,2 kinase substrate motif;Growth associated histone HI kinase substrate motif;GSK-3, ERK1, ERK2, CDK5 substrate motif;WW domain binding motif
NaN	NaN	NaN	NaN	0.651358	0.824777	NaN	NaN	NaN	NaN	NaN	NaN	NaN	1.73468	0.269791	NaN	NaN	0.673863	NaN	NaN	-0.131814	0.388666	NaN	NaN	NaN	0.480402	NaN	0.528253	NaN	NaN	1.6132	-0.321679	NaN	0.0313755	NaN	0.100371	NaN	-0.0336737	NaN	NaN	NaN	0.56588	0.0658734	0.500007	0.0814199	0.413266	S	3	___1	Casein kinase I substrate motif;Casein kinase II substrate motif
0.495632	1.34008	1.00422	NaN	NaN	NaN	NaN	NaN	-0.272223	NaN	1.1935	0.339193	NaN	NaN	NaN	0.866647	0.621643	1.07404	NaN	0.335831	1.05582	0.968973	0.453398	NaN	NaN	NaN	NaN	NaN	0.646296	NaN	-0.460625	NaN	0.281059	NaN	0.881833	1.38236	0.0912067	NaN	0.337968	NaN	NaN	0.866647	0.337968	0.528679	0.0687011	0.303486	S	4	___2	14-3-3 domain binding motif;Calmodulin-dependent protein kinase II substrate motif;Calmodulin-dependent protein kinase IV substrate motif;Casein kinase II substrate motif;Chk1 kinase substrate motif;G protein-coupled receptor kinase 1 substrate motif;PKA kinase substrate motif;PKC kinase substrate motif
0.495632	1.34008	1.00422	NaN	NaN	0.226472	-0.25697	NaN	-0.272223	NaN	1.1935	0.339193	NaN	-0.110452	0.534414	0.866647	0.621643	1.07404	NaN	0.335831	1.05582	0.968973	0.453398	NaN	NaN	NaN	NaN	NaN	0.646296	0.405238	-0.460625	NaN	0.281059	-0.187977	0.881833	1.38236	0.0912067	NaN	0.337968	0.59222	0.463566	0.534414	0.405238	0.129176	0.40819	0.369022	S	4	___2	ERK1,2 kinase substrate motif;G protein-coupled receptor kinase 1 substrate motif;GSK-3, ERK1, ERK2, CDK5 substrate motif;WW domain binding motif
-0.613943	-0.0903613	0.180959	-0.0852148	-0.340344	-0.457297	-1.87107	-0.200871	-0.166416	-0.852384	0.00715558	-0.443373	-0.928307	-0.115619	-0.622216	-0.175413	-0.849655	0.45861	-1.19967	0.00310543	-0.00648577	-0.966653	-0.335369	-0.40623	NaN	-0.127373	NaN	0.0819535	-0.850222	-1.2825	-0.317703	-1.07047	-0.406534	-0.465263	0.0427012	-0.116896	-0.681051	-1.07661	-0.773875	-0.697001	-0.158513	-0.335369	-0.573157	0.237788	0.283342	0.343631	T	3	___2	G protein-coupled receptor kinase 1 substrate motif;GSK-3, ERK1, ERK2, CDK5 substrate motif;WW domain binding motif
-0.552098	-0.0903613	0.180959	-0.0852148	-0.340344	-0.457297	-1.87107	-0.200871	-0.166416	-0.852384	0.00715558	-0.443373	-0.928307	-0.115619	-0.622216	-0.175413	-0.849655	0.45861	-1.19967	0.00310543	-0.00648577	-0.966653	-0.335369	-0.40623	NaN	-0.127373	NaN	0.15886	-0.713243	-1.2825	-0.317703	-1.07047	-0.406534	-0.472079	0.0427012	-0.116896	-0.681051	-1.07661	-0.773875	-0.697001	-0.158513	-0.335369	-0.576565	0.241196	0.279733	0.386778	T	2	___2	Cdc2 kinase substrate motif;CDK1,2,4,6 kinase substrate motif;DNA dependent Protein kinase substrate motif;GSK-3, ERK1, ERK2, CDK5 substrate motif;WW domain binding motif
-0.227953	0.400835	0.380929	NaN	0.211079	-0.369768	NaN	NaN	NaN	-0.635372	0.706313	0.441567	-0.243997	0.79101	-0.958591	0.687631	0.125105	1.47609	NaN	0.30232	0.654004	0.468033	NaN	-0.417964	2.08992	0.815421	NaN	1.11689	-0.731975	-1.13116	-0.10984	0.215961	0.631055	-0.139194	0.552901	NaN	-0.665589	-1.28512	-0.815296	-0.646814	0.377029	0.390882	-0.139194	0.530076	0.0681231	0.0496544	S	3	___2	Casein kinase II substrate motif;G protein-coupled receptor kinase 1 substrate motif
-0.251289	-0.288745	-0.147203	0.311353	0.699896	-0.30785	-2.37803	0.333312	0.773495	-1.84264	0.470012	-0.706865	-0.581164	-0.060731	-0.784202	0.26285	-0.219221	0.565535	-1.28697	-0.439336	-0.170567	0.461969	-0.206008	-0.276654	0.518871	-0.0137452	-0.109262	0.257654	-0.924726	-1.11755	0.198423	-0.892638	-1.36848	-0.788082	0.404467	-0.131987	-0.505097	-0.835029	-0.887935	-1.02778	-0.504152	-0.188287	-0.788082	0.599794	0.0437588	0.10961	T	3	___2	G protein-coupled receptor kinase 1 substrate motif;GSK-3, ERK1, ERK2, CDK5 substrate motif;WW domain binding motif
-0.251289	-0.288745	-0.147203	0.311353	0.699896	-0.390384	-2.37803	0.333312	0.773495	-1.84264	0.470012	-0.706865	-0.525593	-0.060731	-0.784202	0.212026	-0.219221	0.565535	-1.28697	-0.439336	-0.170567	0.461969	-0.206008	-0.276654	0.518871	-0.0137452	-0.109262	0.257654	-0.924726	-1.11755	0.198423	-0.892638	-1.36848	-0.788082	0.404467	-0.131987	-0.505097	-0.835029	-0.887935	-1.02778	-0.504152	-0.188287	-0.788082	0.599794	0.0437588	0.112322	T	2	___2	Cdc2 kinase substrate motif;CDK1,2,4,6 kinase substrate motif;DNA dependent Protein kinase substrate motif;GSK-3, ERK1, ERK2, CDK5 substrate motif;WW domain binding motif
-0.227953	0.400835	0.380929	NaN	0.437382	-0.369768	NaN	NaN	NaN	-0.544203	0.835178	0.441567	-0.184946	0.79101	-1.05089	0.687631	0.125105	1.47609	NaN	0.510881	0.654004	0.223577	NaN	-0.417964	2.08992	0.815421	NaN	1.11689	-0.731975	-1.13116	-0.10984	0.215961	0.631055	-0.139194	0.552901	NaN	-0.491535	-1.31623	-0.815296	-0.646814	0.377029	0.419109	-0.139194	0.558302	0.0572288	0.0464838	T	2	___2	ERK1,2 kinase substrate motif;GSK3, Erk1, Erk2 and CDK5 kinase motif;GSK-3, ERK1, ERK2, CDK5 substrate motif;MAPKAPK2 kinase substrate motif;MDC1 BRCT domain binding motif;Plk1 PBD domain binding motif;WW domain binding motif
1.42789	2.0851	1.44489	NaN	NaN	NaN	NaN	NaN	0.322121	NaN	0.0687911	0.485731	NaN	NaN	0.371659	1.38811	1.50305	1.15075	NaN	0.734572	0.313438	NaN	NaN	1.74559	NaN	0.269056	NaN	0.195736	NaN	-0.748218	NaN	NaN	0.798973	NaN	2.5336	NaN	NaN	NaN	NaN	NaN	0.513674	0.942661	0.513674	0.428988	0.120442	0.627228	S	3	___3	14-3-3 domain binding motif;b-Adrenergic Receptor kinase substrate motif;Calmodulin-dependent protein kinase II substrate motif;G protein-coupled receptor kinase 1 substrate motif;Phosphorylase kinase substrate motif;PKA kinase substrate motif;PKC kinase substrate motif
1.68183	2.0851	1.44489	NaN	NaN	NaN	NaN	NaN	0.322121	NaN	0.0687911	0.485731	NaN	NaN	0.371659	1.38811	1.50305	1.15075	NaN	0.734572	0.313438	NaN	NaN	1.74559	NaN	0.269056	NaN	0.195736	NaN	-0.748218	NaN	NaN	0.798973	NaN	1.96473	NaN	NaN	NaN	NaN	NaN	0.513674	0.942661	0.513674	0.428988	0.120442	0.410559	T	3	___3	G protein-coupled receptor kinase 1 substrate motif;GSK-3, ERK1, ERK2, CDK5 substrate motif;WW domain binding motif
1.68183	2.0851	1.44489	NaN	NaN	NaN	NaN	NaN	0.322121	NaN	0.0687911	0.485731	NaN	NaN	0.371659	1.38811	1.50305	1.15075	NaN	0.734572	0.313438	NaN	NaN	1.74559	NaN	0.269056	NaN	0.195736	NaN	-0.748218	NaN	NaN	0.798973	NaN	1.96473	NaN	NaN	NaN	NaN	NaN	0.513674	0.942661	0.513674	0.428988	0.120442	0.410559	T	2	___3	Cdc2 kinase substrate motif;CDK1,2,4,6 kinase substrate motif;DNA dependent Protein kinase substrate motif;GSK-3, ERK1, ERK2, CDK5 substrate motif;WW domain binding motif
0.117947	NaN	NaN	0.635127	NaN	0.96224	NaN	NaN	0.941574	NaN	-0.241272	0.665781	NaN	0.280123	NaN	0.627598	-0.172655	0.304616	NaN	0.53697	0.882654	NaN	NaN	NaN	NaN	0.362926	NaN	0.709845	NaN	0.156687	0.722516	NaN	0.500488	NaN	3.61278	NaN	NaN	0.0514017	0.0734849	-0.174325	0.588967	0.53697	0.500488	0.0364817	0.481228	0.559374	S	3	___1	Cdc2 kinase substrate motif;CDK kinase substrate motif;CDK1,2,4,6 kinase substrate motif;ERK1,2 kinase substrate motif;G protein-coupled receptor kinase 1 substrate motif;GSK-3, ERK1, ERK2, CDK5 substrate motif;WW domain binding motif
NaN	NaN	NaN	0.812129	0.747289	0.957008	0.540783	0.75299	NaN	0.0216891	NaN	0.473723	0.676539	0.727351	NaN	0.247437	-0.0860969	-0.0575586	NaN	NaN	0.640363	0.432614	0.140393	NaN	NaN	NaN	NaN	0.867343	NaN	0.160931	1.244	NaN	0.259095	0.214815	0.575771	0.404703	NaN	0.158925	NaN	NaN	NaN	0.540783	0.331899	0.208883	0.31481	0.917675	S	3	___1	Casein kinase II substrate motif;Cdc2 kinase substrate motif;CDK kinase substrate motif;CDK1,2,4,6 kinase substrate motif;ERK1,2 kinase substrate motif;GSK-3, ERK1, ERK2, CDK5 substrate motif;MAPKAPK2 kinase substrate motif;WW domain binding motif
0.509481	0.806884	0.248032	1.17227	1.11252	1.22336	0.70777	1.09572	0.99333	0.269809	0.257735	0.922526	NaN	1.01771	0.277359	0.604362	0.0382638	0.454612	NaN	0.809561	1.07657	0.686386	0.338129	NaN	NaN	0.573798	1.01057	0.878744	0.226792	0.286907	1.37598	NaN	0.369976	0.463811	0.951588	0.765068	0.215723	0.583687	0.359809	0.259228	0.619618	0.697078	0.523749	0.173329	0.355423	0.449996	S	3	___1	Casein kinase I substrate motif;ERK1,2 kinase substrate motif;GSK-3, ERK1, ERK2, CDK5 substrate motif;WW domain binding motif
0.772405	0.833294	0.398994	1.07074	0.860502	1.00645	1.0892	NaN	0.710665	0.260697	0.950617	0.994733	NaN	1.06228	NaN	NaN	0.000409899	-0.535703	NaN	NaN	0.816237	0.59906	NaN	0.971375	0.79344	0.286898	0.581689	NaN	NaN	NaN	1.36444	0.397574	0.562377	0.161014	0.697775	0.594456	0.289832	0.249281	0.359576	NaN	NaN	0.816237	0.479976	0.336261	0.188922	0.298217	S	2	___1	14-3-3 domain binding motif;Calmodulin-dependent protein kinase II substrate motif;Casein kinase II substrate motif;Pim1 kinase substrate sequence;PKA kinase substrate motif;PKC epsilon kinase substrate motif;PKC kinase substrate motif;ZIP kinase substrate motif
0.441723	0.904652	0.439772	0.924051	0.868231	1.18547	0.721456	0.723541	0.731941	0.191171	-0.0757914	0.541743	1.11778	0.683121	0.0149159	0.371639	NaN	-0.314942	1.00612	0.613721	0.799203	0.39873	0.15145	0.560006	0.79344	0.341253	0.514416	0.911205	0.390987	0.156185	1.16363	0.422807	0.275188	0.285915	0.669544	-0.226375	-0.0770323	0.371071	0.714675	0.441851	0.688646	0.613721	0.422807	0.190914	0.335094	0.326643	S	2	___1	14-3-3 domain binding motif;Akt kinase substrate motif;Calmodulin-dependent protein kinase II substrate motif;G protein-coupled receptor kinase 1 substrate motif;MAPKAPK1 kinase substrate motif;PKA kinase substrate motif;PKC kinase substrate motif
0.477505	0.612344	0.861221	0.157013	-0.0385648	0.917017	0.908201	0.474978	0.998908	NaN	-0.117744	0.836091	NaN	0.365609	NaN	0.528158	NaN	0.661733	NaN	0.8297	1.00653	1.21207	NaN	NaN	NaN	-0.00644013	NaN	0.873127	0.750826	0.257284	0.970085	NaN	0.456659	0.392426	0.570044	0.67176	0.0638722	0.671168	0.415987	NaN	NaN	0.637038	0.570044	0.0669941	0.485193	0.75073	S	3	___2	Casein kinase I substrate motif;ERK1,2 kinase substrate motif;GSK-3, ERK1, ERK2, CDK5 substrate motif;WW domain binding motif
0.477505	0.612344	0.861221	0.157013	-0.0385648	0.917017	0.908201	0.474978	0.998908	NaN	-0.117744	0.836091	NaN	0.365609	NaN	0.528158	NaN	0.661733	NaN	0.8297	1.00653	1.21207	NaN	NaN	NaN	-0.00644013	NaN	0.873127	0.750826	0.257284	0.970085	NaN	0.456659	0.392426	0.570044	0.67176	0.0638722	0.671168	0.415987	NaN	NaN	0.637038	0.570044	0.0669941	0.485193	0.75073	T	3	___2	GSK-3, ERK1, ERK2, CDK5 substrate motif;RAF1 kinase substrate motif;WW domain binding motif
0.280317	NaN	0.384906	NaN	NaN	NaN	NaN	NaN	NaN	0.701133	NaN	-1.29181	NaN	NaN	-0.774817	NaN	-0.028178	NaN	NaN	-1.06198	NaN	NaN	-0.770756	NaN	NaN	NaN	NaN	-3.17994	0.133271	NaN	0.280691	NaN	-0.178478	NaN	NaN	NaN	NaN	NaN	0.143819	NaN	-0.91826	-0.399467	-0.0226035	-0.376864	0.138137	0.633344	S	3	___1	Casein kinase II substrate motif;PKA kinase substrate motif;PKC kinase substrate motif
0.92042	NaN	1.18864	0.924109	-0.662998	0.207771	-0.098851	0.464532	-0.107699	0.952614	0.283535	-0.127292	NaN	-0.274705	0.500995	0.593922	0.177296	0.575584	NaN	NaN	-0.224322	-0.251217	NaN	0.977044	NaN	NaN	NaN	-0.0120503	NaN	0.811911	-0.415405	1.45523	0.89619	NaN	0.0875858	0.411288	NaN	NaN	0.701813	NaN	0.504677	0.283535	0.504677	-0.221142	0.243121	0.438393	S	3	___1	14-3-3 domain binding motif;Calmodulin-dependent protein kinase II substrate motif;Casein kinase II substrate motif;G protein-coupled receptor kinase 1 substrate motif;GSK3 kinase substrate motif;MAPKAPK2 kinase substrate motif;Phosphorylase kinase substrate motif;PKA kinase substrate motif;PKC kinase substrate motif
-0.366302	NaN	-0.129728	NaN	NaN	NaN	NaN	NaN	-0.148792	-0.0088393	NaN	-0.798958	NaN	NaN	NaN	-0.456715	-1.02963	-1.34065	-0.649484	NaN	NaN	NaN	NaN	-0.616514	NaN	NaN	NaN	-0.997895	-1.00798	-0.13195	NaN	NaN	-0.033262	NaN	-0.824001	-0.975278	NaN	NaN	-0.223052	-1.05848	NaN	-0.536614	-0.899639	0.363025	0.167062	0.628357	S	3	___2	Casein kinase II substrate motif;ERK1,2 kinase substrate motif;G protein-coupled receptor kinase 1 substrate motif;GSK3 kinase substrate motif;GSK-3, ERK1, ERK2, CDK5 substrate motif;PKA kinase substrate motif;WW domain binding motif
-0.366302	NaN	-0.129728	NaN	NaN	NaN	NaN	NaN	-0.148792	-0.0088393	NaN	-0.798958	NaN	NaN	NaN	-0.456715	-1.02963	-1.34065	-0.649484	NaN	NaN	NaN	NaN	-0.616514	NaN	NaN	NaN	-0.997895	-1.00798	-0.13195	NaN	NaN	-0.033262	NaN	-0.824001	-0.975278	NaN	NaN	-0.223052	-1.05848	NaN	-0.536614	-0.899639	0.363025	0.167062	0.628357	S	3	___2	Casein kinase II substrate motif;ERK1,2 kinase substrate motif;G protein-coupled receptor kinase 1 substrate motif;GSK-3, ERK1, ERK2, CDK5 substrate motif;MAPKAPK2 kinase substrate motif;MDC1 BRCT domain binding motif;Plk1 PBD domain binding motif;WW domain binding motif
NaN	NaN	NaN	-0.79275	NaN	NaN	-0.937994	NaN	-0.706491	-1.07799	NaN	-1.10549	NaN	-0.604215	NaN	-1.00952	NaN	NaN	NaN	-1.84355	-0.214457	NaN	-0.690903	NaN	NaN	NaN	NaN	NaN	NaN	0.438558	-0.315009	NaN	NaN	-0.868036	NaN	NaN	-1.13618	-1.43525	-1.46634	NaN	NaN	-0.865372	-1.00211	0.136734	0.399009	0.768118	S	3	___1	DNA dependent Protein kinase substrate motif
NaN	NaN	1.47363	NaN	NaN	NaN	0.491168	NaN	NaN	1.5056	1.08621	NaN	NaN	NaN	NaN	0.522857	1.34506	NaN	1.28529	NaN	0.352739	1.23056	1.05808	NaN	NaN	NaN	NaN	0.991138	NaN	0.742418	NaN	1.15911	NaN	NaN	NaN	NaN	NaN	NaN	0.867213	1.8361	NaN	1.15839	0.991138	0.167248	0.362553	0.72934	S	3	___1	DNA dependent Protein kinase substrate motif;PKA kinase substrate motif;PKC kinase substrate motif
1.51534	1.03367	NaN	NaN	NaN	2.50309	NaN	NaN	3.17147	NaN	NaN	NaN	NaN	2.51426	2.20477	NaN	2.04145	NaN	NaN	2.12347	3.83024	3.52566	1.83435	NaN	NaN	NaN	NaN	3.66749	NaN	2.50609	2.33623	NaN	NaN	NaN	NaN	NaN	NaN	NaN	2.86309	2.70301	NaN	2.20477	2.70301	-0.498238	0.0815682	0.240031	T	3	___1	Calmodulin-dependent protein kinase II substrate motif;GSK-3, ERK1, ERK2, CDK5 substrate motif;MAPKAPK2 kinase substrate motif;PKC kinase substrate motif;WW domain binding motif
-0.0420555	0.20063	0.155256	NaN	1.01151	0.123589	NaN	NaN	-0.834121	0.467892	NaN	-0.291318	NaN	NaN	0.406624	0.415053	1.20326	0.589339	NaN	0.192468	0.574651	1.10558	1.34219	NaN	NaN	NaN	NaN	NaN	1.12239	NaN	NaN	NaN	0.478101	0.739361	NaN	NaN	0.558409	0.598975	NaN	NaN	1.63026	0.410838	0.669168	-0.258329	0.21476	0.0805942	S	2	___1	14-3-3 domain binding motif;Calmodulin-dependent protein kinase II substrate motif;Calmodulin-dependent protein kinase IV substrate motif;Casein kinase II substrate motif;Chk1 kinase substrate motif;G protein-coupled receptor kinase 1 substrate motif;MAPKAPK2 kinase substrate motif;PKA kinase substrate motif;PKC kinase substrate motif;Pyruvate dehydrogenase kinase substrate motif
NaN	-0.46108	NaN	NaN	-0.337878	NaN	NaN	NaN	-1.49402	1.08613	NaN	1.24942	NaN	NaN	-0.875226	NaN	0.568407	NaN	NaN	NaN	-0.470681	-0.57573	NaN	0.443053	NaN	NaN	NaN	-0.326688	NaN	-0.148344	NaN	NaN	-1.94162	NaN	NaN	NaN	NaN	NaN	0.289644	NaN	-0.852457	-0.399479	-0.326688	-0.0727902	0.373558	0.313278	S	2	___1	ATM kinase substrate motif;Casein kinase I substrate motif;DNA dependent Protein kinase substrate motif;PKA kinase substrate motif;PKC kinase substrate motif
-1.66666	NaN	NaN	-1.3459	NaN	-0.836345	NaN	NaN	-0.95319	-1.1609	0.119184	-0.645155	NaN	-0.424355	-1.10369	-1.677	-0.0199215	NaN	NaN	-1.43793	-0.571438	NaN	-0.217107	-1.72309	NaN	-0.93255	NaN	-1.11718	NaN	-0.768513	-0.775991	-1.19853	-1.06272	-0.968908	-0.704056	NaN	-0.804435	-1.36913	NaN	NaN	-0.336051	-0.94287	-0.886671	-0.0561986	0.389496	0.992267	S	2	___1	b-Adrenergic Receptor kinase substrate motif;Casein kinase II substrate motif;ERK1,2 kinase substrate motif;G protein-coupled receptor kinase 1 substrate motif;GSK3 kinase substrate motif;GSK-3, ERK1, ERK2, CDK5 substrate motif;PKA kinase substrate motif;PKC kinase substrate motif;WW domain binding motif
-2.20344	-2.12718	NaN	-2.33197	-1.12376	NaN	-1.83031	NaN	-1.78362	-1.51606	-1.02599	-2.17587	NaN	-2.08529	-1.53229	-2.24008	-2.15286	NaN	NaN	-2.22773	-1.15818	-0.855463	-1.07659	-2.2221	NaN	-2.08707	NaN	-2.53608	-1.54976	-1.34362	NaN	-3.50824	-1.00922	-0.889787	-1.32549	-1.06967	-1.77563	-0.936593	-2.52823	-0.458491	-1.38647	-2.08529	-1.34362	-0.741662	0.0223193	0.42171	S	2	___1	b-Adrenergic Receptor kinase substrate motif;Casein kinase II substrate motif;Pyruvate dehydrogenase kinase substrate motif
NaN	-2.33043	NaN	-2.19801	NaN	-1.91078	NaN	NaN	-2.95503	NaN	-3.66925	-2.51971	NaN	-3.00961	-2.36846	NaN	NaN	NaN	-0.738092	NaN	1.36108	-1.49398	4.97066	NaN	NaN	NaN	NaN	0.571009	NaN	-0.952082	-2.1144	-1.66164	-2.71388	NaN	-1.6926	NaN	NaN	NaN	-1.6422	NaN	NaN	-2.26422	-1.66164	-0.602573	0.048706	0.947764	S	3	___1	G protein-coupled receptor kinase 1 substrate motif
0.38577	NaN	NaN	1.77427	NaN	NaN	NaN	NaN	-0.243958	NaN	0.0407234	NaN	NaN	1.61378	0.0881119	NaN	0.462298	NaN	NaN	NaN	1.24691	0.881703	NaN	NaN	NaN	NaN	NaN	NaN	NaN	0.230095	0.712449	0.827414	NaN	1.16117	0.812462	NaN	NaN	-0.0728068	NaN	NaN	NaN	0.462298	0.762456	-0.300158	0.18528	0.789395	S	2	___1	DNA dependent Protein kinase substrate motif
0.231786	-0.445869	-1.28509	-0.528259	-0.82525	NaN	0.194256	-1.03639	-1.29556	0.467197	0.450451	-0.469577	-2.06989	-1.21943	0.0870724	-0.11621	-0.164418	-1.86511	NaN	-0.72377	-0.328775	0.935195	0.11891	NaN	NaN	-0.998838	NaN	NaN	0.0944089	NaN	-0.399388	NaN	0.890035	0.802864	0.455109	0.0264603	0.486455	0.305766	0.0513993	0.502848	NaN	-0.457723	0.380438	-0.838161	0.0121856	0.000444962	S	3	___1	MDC1 BRCT domain binding motif;PKA kinase substrate motif;PKC kinase substrate motif;Plk1 PBD domain binding motif
0.269897	0.462841	-0.494289	0.403009	0.239936	0.785588	0.509624	0.100954	-0.363348	-0.272201	0.6389	-0.225918	NaN	0.638548	0.217861	0.448331	-0.242587	-0.350909	NaN	-1.25371	0.545666	0.90183	0.434981	0.133657	NaN	0.304068	NaN	0.77864	0.11032	0.230266	0.593798	0.472701	0.0321967	0.510872	0.45837	0.464671	0.32135	0.0619392	-0.0611647	0.213222	0.253799	0.269897	0.287574	-0.0176768	0.427181	0.226661	S	3	___1	14-3-3 domain binding motif;AMP-activated protein kinase substrate motif;b-Adrenergic Receptor kinase substrate motif;BARD1 BRCT domain binding motif;Calmodulin-dependent protein kinase I substrate motif;Calmodulin-dependent protein kinase II substrate motif;Calmodulin-dependent protein kinase IV substrate motif;Casein kinase II substrate motif;Chk1 kinase substrate motif;G protein-coupled recept…
-0.329599	-0.712865	NaN	NaN	-0.454456	-0.447865	0.0859632	-0.755347	NaN	-0.660748	-0.519508	-0.940394	-1.292	-0.548917	-0.379055	-0.944342	-1.16013	-1.15376	NaN	-1.07714	NaN	NaN	-0.625481	NaN	NaN	NaN	NaN	-0.043176	-0.0438791	NaN	-0.646336	NaN	-0.627434	-0.746472	0.186456	NaN	-0.0373678	NaN	NaN	NaN	-0.266347	-0.660748	-0.155113	-0.505635	0.0787924	0.0144055	S	3	___2	14-3-3 domain binding motif;AMP-activated protein kinase substrate motif;b-Adrenergic Receptor kinase substrate motif;BARD1 BRCT domain binding motif;Calmodulin-dependent protein kinase I substrate motif;Calmodulin-dependent protein kinase II substrate motif;Calmodulin-dependent protein kinase IV substrate motif;Casein kinase II substrate motif;Chk1 kinase substrate motif;G protein-coupled recept…
-0.329599	-0.712865	NaN	NaN	-0.454456	-0.447865	0.0859632	-0.755347	NaN	-0.660748	-0.519508	-0.940394	-1.292	-0.548917	-0.379055	-0.944342	-1.16013	-1.15376	NaN	-1.07714	NaN	NaN	-0.625481	NaN	NaN	NaN	NaN	-0.043176	-0.0438791	NaN	-0.646336	NaN	-0.627434	-0.746472	0.186456	NaN	-0.0373678	NaN	NaN	NaN	-0.266347	-0.660748	-0.155113	-0.505635	0.0787924	0.0144055	S	3	___2	Casein kinase I substrate motif;G protein-coupled receptor kinase 1 substrate motif;GSK3 kinase substrate motif
1.53397	NaN	2.96627	4.48924	5.40368	3.5018	NaN	1.13937	1.4776	NaN	NaN	NaN	5.01985	3.08232	1.46675	3.26547	NaN	2.92106	NaN	2.03584	NaN	NaN	1.32221	7.12052	3.9781	2.04903	NaN	NaN	2.79254	1.40248	0.638031	3.9414	1.53706	2.64767	NaN	4.2685	0.729381	1.50775	NaN	NaN	1.93227	2.96627	1.73466	1.23161	0.000111781	0.102378	S	3	___2	Casein kinase I substrate motif;Casein kinase II substrate motif;G protein-coupled receptor kinase 1 substrate motif;GSK3 kinase substrate motif;PKA kinase substrate motif;PKC kinase substrate motif
1.53397	NaN	2.96627	5.07777	5.40368	3.5018	NaN	1.13937	1.4776	NaN	NaN	NaN	5.01985	3.08232	1.46675	3.26547	NaN	NaN	NaN	1.43722	NaN	NaN	1.32221	7.12052	3.9781	2.04903	NaN	NaN	2.79254	1.40248	3.56262	3.9414	1.53706	2.64767	NaN	NaN	0.729381	NaN	NaN	NaN	4.04484	3.0243	2.7201	0.304192	0.217322	0.408428	S	3	___2	Casein kinase I substrate motif;Casein kinase II substrate motif;MAPKAPK2 kinase substrate motif;PKA kinase substrate motif;PKC kinase substrate motif;Pyruvate dehydrogenase kinase substrate motif
3.25176	NaN	NaN	NaN	NaN	2.89151	NaN	NaN	NaN	NaN	NaN	NaN	NaN	NaN	NaN	NaN	NaN	2.84586	NaN	2.49728	NaN	NaN	3.10072	NaN	NaN	NaN	NaN	NaN	2.59861	NaN	3.80952	2.38041	3.11448	2.04244	NaN	4.51111	NaN	NaN	NaN	NaN	3.81329	2.89151	3.11448	-0.222971	0.24168	0.488846	S	3	___3	Casein kinase I substrate motif;Casein kinase II substrate motif;G protein-coupled receptor kinase 1 substrate motif;GSK3 kinase substrate motif;PKA kinase substrate motif;PKC kinase substrate motif
3.25176	NaN	NaN	NaN	NaN	2.89151	NaN	NaN	NaN	NaN	NaN	NaN	NaN	NaN	NaN	NaN	NaN	2.84586	NaN	2.49728	NaN	NaN	3.10072	NaN	NaN	NaN	NaN	NaN	2.59861	NaN	3.80952	2.38041	3.11448	2.04244	NaN	4.51111	NaN	NaN	NaN	NaN	3.81329	2.89151	3.11448	-0.222971	0.24168	0.488846	S	3	___3	Casein kinase I substrate motif;Casein kinase II substrate motif;MAPKAPK2 kinase substrate motif;PKA kinase substrate motif;PKC kinase substrate motif;Pyruvate dehydrogenase kinase substrate motif
3.25176	NaN	NaN	NaN	NaN	2.89151	NaN	NaN	NaN	NaN	NaN	NaN	NaN	NaN	NaN	NaN	NaN	2.84586	NaN	2.49728	NaN	NaN	3.10072	NaN	NaN	NaN	NaN	NaN	2.59861	NaN	3.80952	2.38041	3.11448	2.04244	NaN	4.51111	NaN	NaN	NaN	NaN	3.81329	2.89151	3.11448	-0.222971	0.24168	0.488846	T	3	___3
0.171128	0.333899	NaN	0.291508	NaN	NaN	NaN	0.633831	NaN	NaN	0.396656	NaN	NaN	0.529692	0.0353696	NaN	NaN	-0.295132	NaN	NaN	0.902463	0.306237	NaN	NaN	NaN	NaN	NaN	0.116252	-0.406688	0.088851	NaN	0.454105	-0.451929	NaN	0.626379	NaN	NaN	NaN	-0.390036	NaN	0.12626	0.320068	0.102552	0.217517	0.305254	0.102845	S	2	___1	14-3-3 domain binding motif;Calmodulin-dependent protein kinase II substrate motif;Casein kinase II substrate motif;MAPKAPK1 kinase substrate motif;PAK2 kinase substrate motif;Pim1 kinase substrate sequence;PKA kinase substrate motif;PKC epsilon kinase substrate motif;PKC kinase substrate motif;ZIP kinase substrate motif
0.317071	0.771223	NaN	NaN	0.664018	0.406669	0.741377	0.977591	-0.601759	0.620775	0.0472081	-0.492903	NaN	0.288258	NaN	0.34309	-0.353041	-0.675051	NaN	NaN	-0.0845826	0.537747	0.842626	NaN	NaN	0.0643393	NaN	0.472405	0.26507	0.590595	0.333833	NaN	-0.227018	NaN	1.05081	0.245289	NaN	NaN	0.337283	NaN	-0.470922	0.330081	0.333833	-0.00375259	0.440988	0.82265	S	3	___1	AMP-activated protein kinase substrate motif;Casein kinase II substrate motif;HMGCoA Reductase kinase substrate motif;PKA kinase substrate motif;PKC kinase substrate motif;Pyruvate dehydrogenase kinase substrate motif
0.591306	0.744312	0.317566	0.702262	0.926513	0.471543	0.515853	0.640869	0.141121	0.18947	0.301695	0.809306	1.48945	1.77878	0.159203	NaN	-0.0868411	1.04063	0.0299833	0.234808	1.13467	0.424329	0.503221	0.411225	NaN	0.746272	0.926163	0.131319	-0.0792255	-0.384329	1.15813	0.267417	0.0886358	0.00784335	0.733407	0.236706	-0.0438122	-0.282218	0.40695	NaN	0.0380499	0.509537	0.109978	0.399559	0.139969	0.0220882	S	2	___1	Casein kinase I substrate motif;PKA kinase substrate motif
NaN	2.11203	NaN	NaN	2.25029	NaN	1.9082	1.91591	NaN	1.30251	NaN	2.15237	NaN	NaN	NaN	1.6501	NaN	NaN	NaN	1.50055	NaN	NaN	NaN	NaN	NaN	NaN	NaN	2.07712	NaN	NaN	NaN	NaN	NaN	0.821507	NaN	NaN	NaN	0.602114	1.39064	1.33402	NaN	1.91206	1.33402	0.578033	0.050464	0.0783893	S	2	___1	14-3-3 domain binding motif;Calmodulin-dependent protein kinase II substrate motif;Casein kinase II substrate motif;DNA dependent Protein kinase substrate motif;Phosphorylase kinase substrate motif;Pim1 kinase substrate sequence;PKA kinase substrate motif;PKC epsilon kinase substrate motif;PKC kinase substrate motif
-0.244471	NaN	NaN	-0.170734	NaN	NaN	NaN	NaN	NaN	NaN	NaN	0.419365	NaN	0.820147	-0.333586	0.228329	-0.750919	0.583048	NaN	NaN	0.352439	-0.583903	-0.254905	NaN	NaN	NaN	NaN	-0.517216	NaN	-1.20181	0.0487349	NaN	NaN	-0.239495	0.329308	NaN	NaN	NaN	NaN	NaN	NaN	-0.170734	-0.239495	0.0687613	0.482983	0.324765	S	3	___1	BARD1 BRCT domain binding motif;Casein kinase II substrate motif
NaN	0.412895	NaN	NaN	NaN	NaN	-1.0043	NaN	NaN	-0.795808	NaN	0.000904509	NaN	0.802661	NaN	0.108114	-1.46301	NaN	NaN	NaN	0.619955	-0.265018	NaN	NaN	NaN	NaN	NaN	NaN	NaN	NaN	NaN	NaN	NaN	-1.05707	NaN	0.73552	-1.07503	-0.880489	-0.777865	-1.35325	-0.110162	0.000904509	-0.880489	0.881394	0.00476985	0.232103	S	3	___1	Cdc2 kinase substrate motif;CDK kinase substrate motif;CDK1,2,4,6 kinase substrate motif;ERK1,2 kinase substrate motif;G protein-coupled receptor kinase 1 substrate motif;Growth associated histone HI kinase substrate motif;GSK-3, ERK1, ERK2, CDK5 substrate motif;PKA kinase substrate motif;PKC kinase substrate motif;WW domain binding motif
0.183411	NaN	NaN	0.827627	1.26555	0.906309	NaN	NaN	NaN	NaN	0.420336	1.49131	NaN	1.61869	NaN	0.532262	-0.445378	0.582591	NaN	0.606547	1.37726	0.863444	0.46217	NaN	NaN	NaN	NaN	-0.0778371	-0.370756	-0.180245	1.53183	0.0757558	NaN	1.02375	0.953306	NaN	NaN	0.0256517	NaN	NaN	-0.0513448	0.717087	0.0256517	0.691435	0.0229594	0.121621	S	2	___2	ERK1,2 kinase substrate motif;GSK-3, ERK1, ERK2, CDK5 substrate motif;MAPKAPK2 kinase substrate motif;MDC1 BRCT domain binding motif;Plk1 PBD domain binding motif;WW domain binding motif
0.168455	0.398451	0.198027	0.625059	0.70823	0.668187	0.463376	0.38425	0.338051	NaN	-0.181492	NaN	NaN	1.43776	-0.141508	0.317988	-0.700225	0.761342	NaN	0.185806	0.664424	0.135517	0.292723	NaN	NaN	0.474536	0.518757	0.0665663	0.0174602	-0.459469	0.887337	NaN	-0.477268	-0.111927	0.355356	0.410089	-0.527361	-0.244206	NaN	-0.927465	-0.01775	0.36115	-0.01775	0.3789	0.154899	0.0267664	S	2	___2	b-Adrenergic Receptor kinase substrate motif;Casein kinase I substrate motif;Casein kinase II substrate motif;PKA kinase substrate motif;Pyruvate dehydrogenase kinase substrate motif
0.168455	0.398451	0.198027	0.625059	0.70823	0.668187	0.463376	0.38425	0.338051	NaN	-0.181492	NaN	NaN	1.43776	-0.141508	0.317988	-0.700225	0.761342	NaN	0.185806	0.664424	0.135517	0.292723	NaN	NaN	0.474536	0.518757	0.0665663	0.0174602	-0.459469	0.887337	NaN	-0.477268	-0.111927	0.355356	0.410089	-0.527361	-0.244206	NaN	-0.927465	-0.01775	0.36115	-0.01775	0.3789	0.154899	0.0267664	S	2	___2	BARD1 BRCT domain binding motif;Casein kinase II substrate motif;G protein-coupled receptor kinase 1 substrate motif;MDC1 BRCT domain binding motif;Plk1 PBD domain binding motif
0.252987	0.539084	0.313122	0.654199	1.48349	0.704059	0.623586	0.581772	0.344574	0.179194	-0.0816028	0.803233	1.12176	1.36262	-0.0576584	0.399358	-0.295517	0.923672	0.182542	0.296051	1.05214	0.605196	0.552827	NaN	0.938303	0.32626	0.581891	NaN	0.0125753	-0.502453	1.17508	NaN	-0.225182	0.0852993	0.841066	0.297302	-0.475002	-0.0903332	0.0805291	-0.296447	0.160011	0.552827	0.0805291	0.472298	0.0953255	0.016212	S	2	___2	Casein kinase II substrate motif;G protein-coupled receptor kinase 1 substrate motif;GSK3 kinase substrate motif;PKA kinase substrate motif
0.252987	0.537673	0.186164	0.654199	0.718702	0.704059	0.587163	0.581772	0.344574	0.179194	-0.0816028	0.805176	1.12176	1.36262	-0.0576584	0.399358	-0.295517	0.923672	0.182542	0.296051	1.05214	0.605196	0.552827	NaN	0.938303	0.303789	0.581891	NaN	0.0125753	-0.502453	1.17508	NaN	-0.225182	0.0852993	0.841066	0.297302	-0.475002	-0.0903332	0.0805291	-0.296447	0.160011	0.552827	0.0805291	0.472298	0.0953255	0.0243473	S	2	___2	b-Adrenergic Receptor kinase substrate motif;Casein kinase I substrate motif;Casein kinase II substrate motif;MAPKAPK2 kinase substrate motif
0.0229232	0.587394	NaN	0.563428	1.12463	0.544992	NaN	0.739675	0.269046	0.241058	0.0897763	0.626344	NaN	0.930282	NaN	0.077145	-0.66595	1.03055	NaN	0.0363555	NaN	NaN	0.612719	NaN	NaN	0.782374	NaN	NaN	0.0281202	-0.441499	0.77472	NaN	-0.931849	-0.177844	0.925902	0.647442	NaN	NaN	-1.31092	NaN	0.735943	0.563428	0.0281202	0.535308	0.0659911	0.17722	S	2	___2	Casein kinase I substrate motif;Casein kinase II substrate motif;Pyruvate dehydrogenase kinase substrate motif
0.0229232	0.587394	NaN	0.563428	1.12463	0.544992	NaN	0.739675	0.269046	0.241058	0.0897763	0.626344	NaN	0.930282	NaN	0.077145	-0.736815	1.03055	NaN	0.0363555	0.939022	NaN	0.0700428	NaN	NaN	0.782374	NaN	NaN	0.0281202	-0.441499	0.77472	NaN	-0.931849	-0.177844	-0.0276663	0.647442	NaN	-0.533277	-1.31092	NaN	0.735943	0.55421	-0.102755	0.656965	0.0295131	0.0408628	S	2	___2	b-Adrenergic Receptor kinase substrate motif;Casein kinase II substrate motif
NaN	NaN	NaN	NaN	-1.25255	NaN	NaN	NaN	-1.45365	NaN	-1.64908	-1.60907	NaN	-1.63722	-1.80202	-2.27453	NaN	-1.2893	NaN	-2.58934	-2.23162	-1.33529	NaN	NaN	NaN	NaN	NaN	NaN	NaN	NaN	-2.3042	NaN	NaN	-1.97509	-1.55307	NaN	NaN	-1.48684	-2.27479	NaN	-0.970808	-1.63722	-1.76408	0.126855	0.41102	0.931113	S	3	___1	Casein kinase II substrate motif;ERK1,2 kinase substrate motif;G protein-coupled receptor kinase 1 substrate motif;GSK3 kinase substrate motif;GSK-3, ERK1, ERK2, CDK5 substrate motif;WW domain binding motif
-0.211999	-1.1177	NaN	NaN	NaN	-1.25809	-0.312586	-1.88799	-1.39766	-0.839441	NaN	NaN	-1.90601	-1.83229	-0.976636	-0.5803	-0.557519	NaN	-1.09714	-1.29268	-1.65645	-0.0845115	NaN	-0.630131	NaN	NaN	-1.47845	-1.55998	0.0697114	-0.162967	NaN	-0.868648	-0.11707	-1.08062	-0.89647	-0.594403	-0.58399	-0.778357	-0.327005	NaN	-0.770609	-1.09714	-0.770609	-0.326532	0.168053	0.102947	S	2	___1	Casein kinase II substrate motif;ERK1,2 kinase substrate motif;G protein-coupled receptor kinase 1 substrate motif;Growth associated histone HI kinase substrate motif;GSK-3, ERK1, ERK2, CDK5 substrate motif;PKA kinase substrate motif;PKC kinase substrate motif;WW domain binding motif
NaN	NaN	NaN	NaN	NaN	NaN	NaN	-1.77621	NaN	NaN	NaN	NaN	NaN	NaN	0.163309	-1.01006	0.391723	NaN	NaN	-0.54501	NaN	NaN	NaN	NaN	NaN	NaN	NaN	NaN	0.330035	NaN	-0.61275	-0.0479999	NaN	NaN	-0.634561	NaN	NaN	NaN	-0.0089357	NaN	NaN	-0.54501	-0.0479999	-0.49701	0.0820362	0.442083	S	3	___1	14-3-3 domain binding motif;Calmodulin-dependent protein kinase II substrate motif;Calmodulin-dependent protein kinase IV substrate motif;Casein kinase II substrate motif;Chk1 kinase substrate motif;G protein-coupled receptor kinase 1 substrate motif;GSK3 kinase substrate motif;PKA kinase substrate motif;PKC kinase substrate motif
0.193354	-1.12712	NaN	0.0797531	-0.103178	0.00807277	0.5678	0.215751	0.42034	0.780251	-0.805439	-0.377862	NaN	-0.552347	0.419576	-0.0341132	-0.412414	-0.630156	2.34148	-0.540288	-1.14639	-0.686755	-0.273109	-0.553605	NaN	-0.0728208	-0.0980838	-0.112921	NaN	0.000372389	-0.136224	0.0244026	0.374696	0.401965	-0.23668	0.38622	0.338958	0.226945	-0.342568	NaN	-0.133871	-0.103178	0.000372389	-0.10355	0.344592	0.376589	S	2	___1	b-Adrenergic Receptor kinase substrate motif;Casein kinase II substrate motif;ERK1,2 kinase substrate motif;G protein-coupled receptor kinase 1 substrate motif;GSK-3, ERK1, ERK2, CDK5 substrate motif;MAPKAPK2 kinase substrate motif;PKA kinase substrate motif;PKC kinase substrate motif;WW domain binding motif
2.04409	-0.316362	-0.253472	NaN	-1.09942	NaN	-0.140385	NaN	-0.167382	0.272108	NaN	NaN	NaN	NaN	0.520036	NaN	NaN	NaN	NaN	0.0893381	-1.12691	0.0365706	-0.555852	0.0158927	NaN	NaN	0.17736	NaN	NaN	0.632299	-0.579947	NaN	0.272483	0.00769441	NaN	-0.0159985	-0.0033289	1.08284	0.115621	0.266849	-0.413933	-0.140385	0.115621	-0.256006	0.216473	0.46473	S	2	___1	14-3-3 domain binding motif;Akt kinase substrate motif;Calmodulin-dependent protein kinase II substrate motif;Casein kinase II substrate motif;MAPKAPK1 kinase substrate motif;PKA kinase substrate motif;PKC kinase substrate motif
0.00086393	-0.184318	0.578577	0.194188	-0.97255	0.504945	-0.44019	0.93003	0.539719	NaN	NaN	-0.157542	NaN	NaN	0.357666	-0.408471	0.760996	-0.576794	-1.5392	-0.855162	-0.754235	-0.0229848	-0.865424	NaN	NaN	-0.129534	NaN	0.394759	NaN	0.691044	NaN	0.889488	0.831928	-0.344857	-0.407564	-0.484064	0.678199	1.02168	0.344792	NaN	-0.0980753	-0.143538	0.394759	-0.538297	0.0673853	0.0457829	S	2	___1	14-3-3 domain binding motif;AMP-activated protein kinase substrate motif;Calmodulin-dependent protein kinase II substrate motif;Casein kinase II substrate motif;HMGCoA Reductase kinase substrate motif;PAK2 kinase substrate motif;PKA kinase substrate motif;PKA, PKG kinase substrate motif;PKC epsilon kinase substrate motif;PKC kinase substrate motif;PKG kinase substrate motif
-0.773723	0.0712636	0.186747	1.02404	0.75973	0.165305	NaN	NaN	0.580976	NaN	NaN	NaN	NaN	1.05615	0.48948	NaN	NaN	NaN	NaN	-0.863983	-0.263884	NaN	NaN	NaN	NaN	NaN	NaN	NaN	NaN	0.100578	0.788973	NaN	0.632311	-0.190025	NaN	-0.871038	0.478262	0.425167	NaN	NaN	NaN	0.186747	0.425167	-0.23842	0.229698	0.9299	S	2	___1	14-3-3 domain binding motif;Calmodulin-dependent protein kinase II substrate motif;Calmodulin-dependent protein kinase IV substrate motif;Casein kinase II substrate motif;Chk1 kinase substrate motif;G protein-coupled receptor kinase 1 substrate motif;PKA kinase substrate motif;PKC kinase substrate motif
-0.0252502	0.401156	0.699361	NaN	-0.573823	0.773604	0.174995	0.260151	NaN	0.443453	-0.36451	-0.0530408	NaN	NaN	0.508797	0.389498	NaN	0.872818	NaN	0.411747	-0.489011	NaN	NaN	NaN	NaN	1.02223	NaN	0.628173	0.0899001	0.61172	0.86491	NaN	0.825366	0.148798	-0.401263	NaN	NaN	1.13742	0.712728	0.486069	0.746203	0.395327	0.628173	-0.232846	0.233982	0.164486	S	2	___1	14-3-3 domain binding motif;Akt kinase substrate motif;Calmodulin-dependent protein kinase II substrate motif;MAPKAPK1 kinase substrate motif;PKA kinase substrate motif;PKC kinase substrate motif
-0.179436	NaN	-0.610445	-0.0413586	-1.30122	-0.453383	NaN	-0.581144	NaN	0.112182	NaN	-0.764685	NaN	-1.08819	-0.0570702	-0.462779	-0.109192	-1.017	NaN	-0.213337	-0.781166	-0.685475	-1.04093	-0.124834	NaN	-0.139802	NaN	-0.432062	-0.254974	-0.0556396	-0.84659	NaN	-0.0748483	0.14301	-0.918964	-0.720258	NaN	0.0369736	NaN	-0.809866	-0.59078	-0.462779	-0.432062	-0.0307169	0.414331	0.554435	S	3	___2	Casein kinase I substrate motif;Casein kinase II substrate motif;ERK1,2 kinase substrate motif;GSK-3, ERK1, ERK2, CDK5 substrate motif;PKA kinase substrate motif;PKC kinase substrate motif;WW domain binding motif
-0.179436	NaN	-0.610445	NaN	-1.30122	-0.453383	NaN	NaN	NaN	0.112182	NaN	-0.764685	NaN	-1.08819	-0.0570702	-0.462779	-0.109192	-1.017	NaN	-0.213337	-0.781166	-0.685475	-1.04093	-0.124834	NaN	-0.139802	NaN	-0.432062	-0.254974	-0.0556396	-0.84659	NaN	-0.0748483	0.14301	-0.918964	-0.720258	NaN	0.0369736	NaN	-0.809866	-0.59078	-0.462779	-0.432062	-0.0307169	0.414331	0.475936	S	2	___2	Casein kinase I substrate motif;ERK1,2 kinase substrate motif;GSK-3, ERK1, ERK2, CDK5 substrate motif;WW domain binding motif
-0.637101	-2.22351	-2.52483	-2.08236	-1.72712	NaN	NaN	NaN	-0.816349	-1.71309	-0.0461362	-1.30571	NaN	-0.997728	-1.70496	-0.566462	-2.67794	-3.00462	NaN	NaN	-0.490276	-1.274	-1.61289	NaN	NaN	-2.97661	NaN	-0.905925	-2.81668	NaN	-1.72731	NaN	-0.681112	-0.918855	-0.308616	-1.71239	NaN	-1.78168	-2.56166	-2.87453	-1.37782	-1.65892	-1.71239	0.0534635	0.498294	0.931272	S	2	___1	b-Adrenergic Receptor kinase substrate motif;Cdc2 kinase substrate motif;CDK kinase substrate motif;CDK1,2,4,6 kinase substrate motif;ERK1,2 kinase substrate motif;Growth associated histone HI kinase substrate motif;GSK-3, ERK1, ERK2, CDK5 substrate motif;PKA kinase substrate motif;PKC kinase substrate motif;WW domain binding motif
-2.0664	-1.27041	0.014354	-1.68582	-0.92984	-2.23932	-1.05985	NaN	0.731398	-1.3393	-0.760858	-1.19831	-0.794973	-0.562168	-1.56504	-2.77705	-1.3414	-1.50938	-1.06499	-2.15446	-1.49536	-1.0605	-1.43312	-2.57112	NaN	-1.95523	-1.84556	-1.30436	-1.42415	-1.29352	-1.10836	-1.41666	-1.7863	-1.68722	-1.34616	-1.58788	-1.33525	-1.46457	-1.42988	-1.53252	-1.44364	-1.34035	-1.42988	0.0895252	0.457073	0.4428	S	3	___1	Casein kinase II substrate motif;ERK1,2 kinase substrate motif;G protein-coupled receptor kinase 1 substrate motif;GSK3 kinase substrate motif;GSK-3, ERK1, ERK2, CDK5 substrate motif;PAK2 kinase substrate motif;Pim1 kinase substrate sequence;PKA kinase substrate motif;PKC kinase substrate motif;WW domain binding motif
-1.077	NaN	-1.18901	NaN	NaN	-0.827137	NaN	NaN	-0.903242	NaN	-0.487596	-0.3969	NaN	0.160512	-1.16692	-0.41638	-0.726009	-0.337036	NaN	-0.740424	-0.594145	-0.959492	NaN	NaN	NaN	NaN	NaN	NaN	NaN	-0.538769	-0.0892249	NaN	-1.68072	-1.29784	-0.485923	-0.559022	-1.50324	-1.4758	NaN	NaN	NaN	-0.733217	-0.92843	0.195213	0.330194	0.286299	S	2	___1	Casein kinase II substrate motif
NaN	0.0648794	NaN	NaN	NaN	NaN	NaN	NaN	0.14405	-0.25236	-0.12877	0.518603	NaN	1.11156	-0.688929	0.110761	-0.191167	0.28221	NaN	-0.157706	0.469668	-0.673903	NaN	NaN	NaN	NaN	NaN	NaN	NaN	-0.591388	0.434945	NaN	NaN	-0.52166	0.208687	NaN	NaN	-0.959735	-0.617786	NaN	NaN	0.0648794	-0.556524	0.621403	0.0378308	0.168524	S	2	___1	b-Adrenergic Receptor kinase substrate motif;Casein kinase I substrate motif;Casein kinase II substrate motif;G protein-coupled receptor kinase 1 substrate motif
-1.26173	NaN	NaN	-1.09389	NaN	-0.560124	-1.0065	-1.94296	-0.691057	NaN	-0.650532	-0.257845	NaN	0.110961	NaN	NaN	-1.40755	-0.865092	NaN	-1.5739	-0.566574	-0.826244	NaN	NaN	NaN	NaN	-0.972567	-0.552377	NaN	-1.93081	-0.415693	NaN	-0.749589	-0.616115	-0.752092	-0.445231	NaN	-1.24565	NaN	NaN	-1.09997	-0.845668	-0.750841	-0.0948272	0.352723	0.917302	S	3	___1	Casein kinase II substrate motif;ERK1,2 kinase substrate motif;Growth associated histone HI kinase substrate motif;GSK-3, ERK1, ERK2, CDK5 substrate motif;PKA kinase substrate motif;WW domain binding motif
NaN	NaN	-0.614824	NaN	-0.518123	-0.458458	NaN	-0.865313	NaN	-1.42755	-0.180908	0.245052	NaN	-0.152895	NaN	-0.311236	-2.83026	NaN	NaN	-2.02857	0.0428321	-0.0515896	NaN	NaN	NaN	NaN	NaN	0.0238999	NaN	-0.130698	-0.777943	NaN	-0.0588163	-0.176074	0.104509	NaN	-1.2133	NaN	-0.874991	-1.59289	-1.36304	-0.458458	-0.477009	0.0185505	0.463246	0.761305	S	2	___1	14-3-3 domain binding motif;Aurora-A kinase substrate motif;Calmodulin-dependent protein kinase II substrate motif;Casein kinase II substrate motif;MAPKAPK2 kinase substrate motif;PAK2 kinase substrate motif;Phosphorylase kinase substrate motif;PKA kinase substrate motif;PKC epsilon kinase substrate motif;PKC kinase substrate motif
-0.90414	-0.905371	-1.27455	-1.11992	-0.838086	-0.902232	-1.12344	-1.74917	-0.289899	NaN	-0.516242	-0.25741	NaN	0.512262	NaN	-0.666162	-1.74891	NaN	NaN	-1.66763	-0.148952	-0.660841	-0.514848	NaN	NaN	-1.77803	NaN	-0.778918	NaN	-1.58016	-0.608468	NaN	-0.509578	-0.589255	-0.148197	-0.309727	-1.17316	-1.31931	-1.29547	-1.34567	-1.0673	-0.902232	-0.92311	0.0208771	0.465576	0.908455	S	3	___2	b-Adrenergic Receptor kinase substrate motif;Casein kinase II substrate motif;ERK1,2 kinase substrate motif;GSK-3, ERK1, ERK2, CDK5 substrate motif;WW domain binding motif
-0.90414	-1.01215	-1.27455	NaN	-0.804624	NaN	-1.1857	-1.78728	-0.289899	NaN	-0.595834	NaN	NaN	0.551826	NaN	-0.531936	-1.66049	NaN	NaN	-1.66763	NaN	NaN	-0.425584	NaN	NaN	NaN	NaN	NaN	NaN	-1.61374	-0.499733	NaN	-0.347816	-0.589255	NaN	-0.431518	-1.2053	-1.37018	NaN	NaN	-1.01276	-0.90414	-0.801007	-0.103133	0.34498	0.975941	S	3	___2	Casein kinase I substrate motif;DNA dependent Protein kinase substrate motif
NaN	-1.01215	-1.27455	-1.11992	-0.838086	-0.902232	-1.1857	-1.74917	NaN	NaN	-0.436637	-0.272115	NaN	0.472672	NaN	-0.531936	-1.74891	NaN	NaN	-1.75633	-0.150329	-0.660841	NaN	NaN	NaN	-1.65992	NaN	-0.778918	NaN	-1.54657	-0.499733	NaN	-0.509578	-0.658171	-0.148197	-0.431518	NaN	NaN	-1.29547	-1.34567	-1.12184	-0.957192	-0.718545	-0.238647	0.229524	0.674224	S	3	___2	Casein kinase II substrate motif;MDC1 BRCT domain binding motif;PKA kinase substrate motif;PKC kinase substrate motif;Plk1 PBD domain binding motif
-0.351997	NaN	NaN	NaN	-0.392635	-0.505699	NaN	0.0542377	NaN	NaN	0.890699	NaN	NaN	NaN	0.205451	NaN	-0.00992931	NaN	-0.771908	-0.270075	-0.321191	-0.04417	NaN	-0.686264	NaN	0.199695	NaN	-0.392504	NaN	0.0190011	-1.22717	NaN	0.399563	-0.210208	-0.627829	NaN	-0.00131482	-0.356692	-0.0823437	NaN	0.58262	-0.270075	-0.146276	-0.123799	0.325998	0.863281	S	2	___1	Casein kinase II substrate motif;ERK1,2 kinase substrate motif;GSK-3, ERK1, ERK2, CDK5 substrate motif;MDC1 BRCT domain binding motif;Plk1 PBD domain binding motif;WW domain binding motif
-1.25149	NaN	NaN	NaN	NaN	-1.72967	NaN	NaN	-1.06704	NaN	NaN	NaN	NaN	NaN	-1.53108	-0.680386	-1.33312	NaN	NaN	-2.50031	NaN	-1.34011	NaN	NaN	NaN	NaN	NaN	NaN	NaN	NaN	NaN	NaN	NaN	-1.78792	NaN	NaN	-1.5497	-1.50174	-1.62374	NaN	-1.70704	-1.33661	-1.62374	0.287125	0.233391	0.325073	S	2	___1	Casein kinase I substrate motif;Casein kinase II substrate motif;Cdc2 kinase substrate motif;CDK kinase substrate motif;CDK1,2,4,6 kinase substrate motif;ERK1,2 kinase substrate motif;GSK-3, ERK1, ERK2, CDK5 substrate motif;WW domain binding motif
0.474472	0.996716	0.618311	NaN	1.46077	0.446094	NaN	1.10213	1.34038	0.273179	0.314341	1.04862	2.52397	0.491596	NaN	0.617983	-2.22602	1.76108	1.09717	1.04547	0.031552	0.0817206	NaN	1.03375	NaN	0.689021	NaN	0.934383	0.0406116	-0.0515928	0.567801	NaN	-0.367719	NaN	0.762649	-0.0017637	NaN	-0.0939984	0.0990256	NaN	0.497221	0.689021	0.0698186	0.619202	0.038403	0.0494296	S	3	___1	ERK1,2 kinase substrate motif;GSK-3, ERK1, ERK2, CDK5 substrate motif;PKA kinase substrate motif;PKC kinase substrate motif;WW domain binding motif
-0.328223	0.254831	NaN	0.901425	0.78125	0.953237	-0.160254	0.153821	0.856106	NaN	-0.64046	0.370226	1.08413	1.98062	-0.105879	0.613273	-0.76456	0.978864	0.675619	0.0218031	0.65855	-0.123478	-0.816465	1.03272	NaN	0.747704	NaN	0.304085	NaN	-0.351578	0.981499	-0.502544	-1.49034	-0.739663	0.46341	-0.514809	-1.07591	-0.315634	-0.319346	-0.791648	-0.100723	0.613273	-0.351578	0.964851	0.00215927	0.00366371	S	3	___1	Branched chain alpha-ketoacid dehydrogenase kinase substrate motif;Casein kinase II substrate motif;Pyruvate dehydrogenase kinase substrate motif
-0.0797281	0.608079	0.323058	0.597867	1.6844	0.638236	NaN	0.39639	-0.285918	-0.274944	-0.176523	NaN	1.48894	1.70244	-0.574721	0.574344	-0.71926	1.34348	1.35818	0.674332	0.797163	0.288215	0.410171	1.34659	NaN	0.587882	NaN	0.774596	-0.167941	-0.0746443	0.840904	0.668956	-0.949848	0.148385	1.48664	0.482057	-1.01778	-0.467345	0.0396754	NaN	0.873319	0.587882	0.148385	0.439497	0.113957	0.179672	S	3	___1	Branched chain alpha-ketoacid dehydrogenase kinase substrate motif;Casein kinase II substrate motif;MAPKAPK2 kinase substrate motif
0.418923	1.01661	NaN	0.753544	2.07465	1.19458	0.989472	0.382641	0.582227	-0.00251064	NaN	-1.08406	2.30168	1.68074	0.0223726	0.59611	-0.474425	1.31468	NaN	0.80723	1.64413	0.573629	0.772222	NaN	-0.0449448	0.416629	NaN	0.542637	NaN	-0.187143	0.603705	NaN	-0.711266	NaN	1.09441	0.714385	NaN	0.499715	0.153829	NaN	0.439259	0.674827	0.499715	0.175112	0.353342	0.142779	S	3	___2	Branched chain alpha-ketoacid dehydrogenase kinase substrate motif;Casein kinase II substrate motif;Pyruvate dehydrogenase kinase substrate motif
0.418923	1.01661	NaN	0.810435	1.95853	NaN	NaN	0.54956	0.582227	0.0094378	-0.278112	-1.08406	2.30168	1.68074	0.0223726	0.824502	-0.474425	NaN	NaN	0.80723	0.936896	0.573629	NaN	NaN	-0.0449448	0.416629	NaN	0.821127	NaN	-0.148228	0.701058	NaN	-0.711266	NaN	1.17163	NaN	NaN	NaN	0.153829	NaN	0.439259	0.573629	0.439259	0.13437	0.401874	0.458658	S	3	___2	Branched chain alpha-ketoacid dehydrogenase kinase substrate motif;Casein kinase II substrate motif;MAPKAPK2 kinase substrate motif
0.69548	0.459747	0.330326	0.340464	-1.67672	-0.767132	-1.00264	-0.473528	-0.302821	0.691992	0.123356	0.235731	0.256279	-0.749069	0.590119	0.744722	0.769246	-0.543464	-0.777169	0.118869	-0.123163	0.0633396	-0.553868	0.0642822	NaN	-0.0455734	NaN	-0.329036	0.202415	0.428284	-0.349188	-0.208383	0.50342	0.356424	0.33257	-0.11804	0.405306	0.77587	0.582289	0.773306	-0.289854	0.0642822	0.344497	-0.280215	0.199009	0.0992042	S	2	___1	14-3-3 domain binding motif;Calmodulin-dependent protein kinase II substrate motif;Calmodulin-dependent protein kinase IV substrate motif;Casein kinase II substrate motif;Chk1 kinase substrate motif;MAPKAPK2 kinase substrate motif;PKA kinase substrate motif;PKC kinase substrate motif
0.0943864	NaN	1.02607	1.41848	2.46504	0.743745	1.13007	1.24881	2.77	NaN	-0.31834	2.2308	3.00074	1.45768	-0.526209	0.653066	-1.94906	2.24103	-0.37279	1.28709	1.75716	NaN	-0.20131	0.986067	NaN	0.97232	NaN	0.568409	NaN	-1.6561	0.324001	-0.479294	-1.23445	-1.53239	1.48592	NaN	-2.05511	-0.982808	-0.691097	NaN	-0.450578	1.07807	-0.691097	1.76917	3.78202e-08	0.000682192	S	2	___1	14-3-3 domain binding motif;Calmodulin-dependent protein kinase II substrate motif;Casein kinase II substrate motif;ERK1,2 kinase substrate motif;G protein-coupled receptor kinase 1 substrate motif;GSK3 kinase substrate motif;GSK-3, ERK1, ERK2, CDK5 substrate motif;MAPKAPK2 kinase substrate motif;PKA kinase substrate motif;PKC kinase substrate motif;WW domain binding motif
-0.986854	NaN	NaN	-0.240017	1.31101	-0.256571	0.155873	0.583847	1.85796	NaN	-1.06814	1.29727	1.48697	1.4777	NaN	-0.684669	-3.37884	0.532454	NaN	0.0881665	0.555651	-0.741886	-0.59055	NaN	NaN	0.0477713	NaN	-1.26391	NaN	-2.46736	-0.195411	NaN	-2.77229	-2.72366	0.151832	NaN	NaN	-2.44061	NaN	NaN	NaN	0.0881665	-2.44061	2.52877	4.21885e-15	0.00877016	S	2	___1	Casein kinase I substrate motif;Casein kinase II substrate motif;ERK1,2 kinase substrate motif;G protein-coupled receptor kinase 1 substrate motif;GSK-3, ERK1, ERK2, CDK5 substrate motif;MAPKAPK2 kinase substrate motif;WW domain binding motif
0.653676	NaN	1.42574	NaN	2.50368	1.70524	1.6819	1.7936	3.16514	NaN	0.120761	3.18073	NaN	2.6013	0.348562	NaN	NaN	2.9968	1.77461	NaN	NaN	1.23264	NaN	NaN	NaN	NaN	NaN	NaN	-1.16851	-0.0616421	1.64238	NaN	NaN	1.10032	1.57871	NaN	-0.676485	NaN	NaN	NaN	NaN	1.73992	0.519339	1.22058	0.000127991	0.0368603	S	3	___1	Casein kinase II substrate motif;G protein-coupled receptor kinase 1 substrate motif;MAPKAPK2 kinase substrate motif
NaN	NaN	NaN	NaN	NaN	1.82034	1.04612	NaN	NaN	-1.2521	NaN	2.54404	NaN	2.71738	-0.864968	1.15164	-0.809968	2.48176	NaN	1.80647	2.38236	NaN	NaN	NaN	NaN	NaN	NaN	NaN	NaN	NaN	0.60203	NaN	-0.157579	NaN	1.2211	NaN	NaN	NaN	0.0968922	NaN	-0.53475	1.80647	0.0968922	1.70958	1.04987e-07	0.106569	S	3	___2	ERK1,2 kinase substrate motif;G protein-coupled receptor kinase 1 substrate motif;GSK3 kinase substrate motif;GSK-3, ERK1, ERK2, CDK5 substrate motif;MDC1 BRCT domain binding motif;Plk1 PBD domain binding motif;WW domain binding motif
NaN	NaN	NaN	NaN	NaN	1.82034	1.04612	NaN	NaN	-1.2521	-0.981753	2.54404	NaN	2.71738	-0.864968	1.15164	-0.809968	2.48176	NaN	2.13122	2.38236	NaN	NaN	NaN	NaN	NaN	NaN	NaN	NaN	NaN	0.60203	NaN	-0.157579	NaN	1.2211	NaN	NaN	NaN	0.0968922	NaN	-0.53475	1.48599	0.0968922	1.3891	1.42668e-05	0.172125	S	3	___2	Cdc2 kinase substrate motif;CDK kinase substrate motif;CDK1,2,4,6 kinase substrate motif;CDK4 kinase substrate motif;ERK1,2 kinase substrate motif;G protein-coupled receptor kinase 1 substrate motif;GSK-3, ERK1, ERK2, CDK5 substrate motif;MAPKAPK2 kinase substrate motif;WW domain binding motif
-0.42482	1.29664	0.508397	-0.303257	0.428589	-1.08589	NaN	NaN	0.682498	-2.64292	-0.383124	0.981391	NaN	NaN	NaN	0.247083	NaN	0.99878	-0.932092	0.809408	1.09428	0.0318089	-1.03293	NaN	1.26918	-0.744655	0.824216	-0.351039	NaN	-2.28047	-1.081	NaN	-2.1744	-2.16734	0.872689	-1.07351	NaN	-1.93728	-0.311392	-3.24828	-0.529788	0.247083	-1.07725	1.32433	3.42143e-05	0.0155142	S	2	___2	Casein kinase I substrate motif;Casein kinase II substrate motif;ERK1,2 kinase substrate motif;G protein-coupled receptor kinase 1 substrate motif;GSK-3, ERK1, ERK2, CDK5 substrate motif;MAPKAPK2 kinase substrate motif;WW domain binding motif
-1.76853	0.688055	-0.238923	-0.057813	-0.511891	0.299422	0.363416	0.222409	1.26033	NaN	-1.26957	1.25828	1.39893	1.89456	-2.37067	0.4268	-2.70137	0.984741	-0.909492	1.03308	0.514433	-1.48641	NaN	NaN	-0.284949	-0.741874	NaN	NaN	NaN	-3.0118	-0.183515	-1.41839	-2.10832	NaN	-0.061073	NaN	NaN	NaN	-1.09386	NaN	NaN	0.222409	-1.25613	1.47853	3.99506e-06	0.0477654	S	2	___2	Casein kinase II substrate motif;ERK1,2 kinase substrate motif;GSK-3, ERK1, ERK2, CDK5 substrate motif;WW domain binding motif
-1.76853	0.688055	-0.238923	-0.057813	-0.58574	0.299422	0.363416	0.222409	1.26033	NaN	-1.26957	1.25828	1.39893	1.89456	-2.37067	0.4268	-2.70137	0.984741	-0.909492	1.48272	0.514433	-1.48641	NaN	NaN	-0.284949	-0.741874	NaN	NaN	NaN	-3.0118	-0.183515	-1.41839	-2.10832	NaN	-0.061073	NaN	NaN	NaN	-1.09386	NaN	NaN	0.222409	-1.25613	1.47853	3.99506e-06	0.0457682	S	2	___2	Casein kinase II substrate motif;ERK1,2 kinase substrate motif;GSK-3, ERK1, ERK2, CDK5 substrate motif;WW domain binding motif
-0.42482	1.22858	0.508397	-0.303257	0.428589	-1.08589	NaN	NaN	0.682498	-2.64292	-0.383124	0.981391	NaN	NaN	NaN	0.247083	NaN	1.09543	-0.932092	0.809408	1.09428	0.0318089	-1.03293	NaN	1.26918	-0.744655	0.824216	-0.351039	NaN	-2.28047	-1.081	NaN	-2.1744	-2.16734	0.872689	-1.07351	NaN	-1.93728	-0.311392	-3.24828	-0.529788	0.247083	-1.07725	1.32433	3.42143e-05	0.0154133	T	2	___2	ERK1,2 kinase substrate motif;Growth associated histone HI kinase substrate motif;GSK3, Erk1, Erk2 and CDK5 kinase motif;GSK-3, ERK1, ERK2, CDK5 substrate motif;PKA kinase substrate motif;PKC kinase substrate motif;RAF1 kinase substrate motif;WW domain binding motif
-1.58442	-0.850489	-0.75949	NaN	0.235047	NaN	NaN	-1.90487	-1.79112	-0.019451	-1.72306	NaN	NaN	NaN	0.135976	NaN	NaN	NaN	NaN	NaN	NaN	-0.213707	0.0331436	-1.30791	NaN	-1.34652	NaN	-1.44441	NaN	-0.640265	-1.86681	-0.26196	NaN	-0.319562	-1.20756	-0.223981	-1.76545	NaN	NaN	NaN	-0.36935	-0.850489	-0.640265	-0.210224	0.251816	0.885225	S	2	___1	14-3-3 domain binding motif;Aurora-A kinase substrate motif;Calmodulin-dependent protein kinase II alpha substrate motif;Calmodulin-dependent protein kinase II substrate motif;Calmodulin-dependent protein kinase IV substrate motif;Casein kinase II substrate motif;MDC1 BRCT domain binding motif;PAK2 kinase substrate motif;Phosphorylase kinase substrate motif;PKA kinase substrate motif;PKC epsilon …
0.828532	1.51914	NaN	0.728688	2.71124	0.887449	1.70745	NaN	0.826002	NaN	0.854858	-0.0932082	NaN	0.758538	NaN	1.41489	0.548979	1.65013	NaN	0.997469	1.255	1.03778	1.33421	0.963934	NaN	NaN	NaN	2.14324	1.39176	0.93524	-0.908421	0.557261	0.0707245	1.44549	1.35688	NaN	0.824516	1.00484	NaN	NaN	1.54565	0.980701	1.00484	-0.0241388	0.420803	0.570272	S	3	___1	ERK1,2 kinase substrate motif;GSK-3, ERK1, ERK2, CDK5 substrate motif;PKA kinase substrate motif;PKC kinase substrate motif;WW domain binding motif
-2.98908	-2.9119	NaN	-3.24927	-1.5783	NaN	-2.38658	NaN	-1.93064	-3.10592	NaN	-2.47811	NaN	NaN	-2.94264	-2.66492	-2.05638	-3.42456	NaN	-1.87088	-1.97584	-1.66977	NaN	NaN	NaN	-3.45334	NaN	-2.97094	-2.7447	-1.82989	-2.1395	NaN	-3.5149	-0.625147	-2.00363	-2.31492	-2.58786	-0.760241	-3.0458	NaN	-2.84009	-2.57151	-2.45139	-0.120128	0.329339	0.394196	S	3	___2	Casein kinase I substrate motif;ERK1,2 kinase substrate motif;G protein-coupled receptor kinase 1 substrate motif;GSK-3, ERK1, ERK2, CDK5 substrate motif;MAPKAPK2 kinase substrate motif;WW domain binding motif
NaN	NaN	NaN	NaN	0.36649	0.507497	NaN	NaN	1.1013	NaN	0.18818	NaN	NaN	NaN	NaN	NaN	0.153024	NaN	NaN	-0.250828	NaN	NaN	NaN	NaN	NaN	0.152367	NaN	1.04398	0.451358	0.700752	NaN	NaN	-0.972694	NaN	0.25266	0.0367339	NaN	0.360395	-0.0868894	NaN	NaN	0.18818	0.306528	-0.118348	0.330964	0.729846	S	3	___2	14-3-3 domain binding motif;Calmodulin-dependent protein kinase II substrate motif;ERK1,2 kinase substrate motif;G protein-coupled receptor kinase 1 substrate motif;GSK-3, ERK1, ERK2, CDK5 substrate motif;MAPKAPK2 kinase substrate motif;PKA kinase substrate motif;PKC kinase substrate motif;WW domain binding motif
NaN	0.784921	NaN	NaN	NaN	1.67655	NaN	NaN	NaN	NaN	1.56873	2.24366	3.12184	0.783649	1.2804	NaN	0.578295	1.15402	NaN	1.12331	1.80376	1.58046	0.854754	NaN	NaN	1.92096	NaN	NaN	NaN	NaN	1.97917	NaN	1.33515	1.27951	0.779253	NaN	NaN	NaN	0.778753	NaN	2.254	1.42457	1.30733	0.117237	0.422795	0.845641	S	3	___3	DNA dependent Protein kinase substrate motif;ERK1,2 kinase substrate motif;G protein-coupled receptor kinase 1 substrate motif;GSK-3, ERK1, ERK2, CDK5 substrate motif;WW domain binding motif
NaN	0.784921	0.891099	NaN	NaN	1.67655	NaN	NaN	NaN	0.738948	1.56873	2.24366	3.33385	0.783649	1.2804	0.767898	NaN	1.15402	NaN	1.51427	1.80376	NaN	0.854754	NaN	NaN	1.92096	NaN	2.1688	NaN	0.905694	1.97917	NaN	1.64902	NaN	0.779253	NaN	0.988697	1.18504	NaN	NaN	2.254	1.2804	1.41703	-0.136629	0.314433	0.813021	S	3	___3	14-3-3 domain binding motif;Calmodulin-dependent protein kinase II substrate motif;ERK1,2 kinase substrate motif;G protein-coupled receptor kinase 1 substrate motif;GSK-3, ERK1, ERK2, CDK5 substrate motif;MAPKAPK2 kinase substrate motif;PKA kinase substrate motif;PKC kinase substrate motif;WW domain binding motif
0.797718	NaN	0.891099	NaN	NaN	1.67655	1.48249	NaN	NaN	0.738948	NaN	NaN	3.22787	NaN	NaN	0.767898	0.609277	NaN	NaN	1.90521	NaN	NaN	0.854754	NaN	NaN	NaN	NaN	2.1688	NaN	0.905694	NaN	NaN	NaN	1.27951	NaN	NaN	0.988697	1.18504	NaN	NaN	NaN	0.872926	1.18504	-0.312118	0.177336	0.976331	T	3	___3	Casein kinase II substrate motif;G protein-coupled receptor kinase 1 substrate motif;PKA kinase substrate motif;PKC kinase substrate motif
0.797718	0.784921	0.891099	NaN	NaN	1.67655	1.48249	NaN	NaN	0.738948	1.56873	2.24366	3.33385	0.783649	1.2804	0.767898	0.547332	1.15402	NaN	1.12331	1.80376	1.58046	0.854754	NaN	NaN	1.92096	NaN	2.1688	NaN	0.905694	1.97917	NaN	1.64902	1.27951	0.779253	NaN	0.988697	1.18504	0.778753	NaN	2.254	1.15402	1.23228	-0.0782545	0.368355	0.79367	T	3	___3	G protein-coupled receptor kinase 1 substrate motif;GSK-3, ERK1, ERK2, CDK5 substrate motif;MAPKAPK2 kinase substrate motif;WW domain binding motif
NaN	2.96765	2.30538	NaN	NaN	NaN	1.92538	NaN	1.89429	1.41901	NaN	NaN	NaN	NaN	NaN	1.64874	1.75701	NaN	NaN	2.37713	3.05499	NaN	0.438615	NaN	NaN	NaN	4.20659	3.73646	2.15216	NaN	NaN	NaN	1.74492	1.92703	NaN	NaN	NaN	NaN	NaN	NaN	NaN	1.90984	2.15216	-0.242322	0.226725	0.217876	S	2	___2	ERK1,2 kinase substrate motif;G protein-coupled receptor kinase 1 substrate motif;GSK3 kinase substrate motif;GSK-3, ERK1, ERK2, CDK5 substrate motif;WW domain binding motif
NaN	2.96765	2.30538	NaN	NaN	NaN	1.92538	NaN	1.89429	1.41901	NaN	NaN	NaN	NaN	NaN	1.64874	1.75701	NaN	NaN	2.37713	3.05499	NaN	0.438615	NaN	NaN	NaN	4.20659	3.73646	2.15216	NaN	NaN	NaN	1.74492	1.92703	NaN	NaN	NaN	NaN	NaN	NaN	NaN	1.90984	2.15216	-0.242322	0.226725	0.217876	S	2	___2	ERK1,2 kinase substrate motif;Growth associated histone HI kinase substrate motif;GSK-3, ERK1, ERK2, CDK5 substrate motif;MAPKAPK2 kinase substrate motif;PKA kinase substrate motif;PKC kinase substrate motif;WW domain binding motif
-0.366571	-0.168805	-0.151342	-0.110079	0.349019	-0.141903	-0.265555	-0.348235	-0.240934	-0.44179	-0.292274	-0.250868	0.103707	0.250024	-0.262869	-0.357566	-0.576383	0.14622	-0.322936	-0.409267	-0.0204667	-0.129017	0.130147	-0.185741	0.13503	-0.185256	NaN	-0.204609	-0.124421	-0.486859	0.176129	-0.580541	-0.677289	-0.514119	-0.170692	-0.002892	-0.537877	-0.478687	-0.234339	-0.376743	-0.287467	-0.185498	-0.332105	0.146607	0.387099	0.048596	S	2	___1	b-Adrenergic Receptor kinase substrate motif;Cdc2 kinase substrate motif;CDK kinase substrate motif;CDK1,2,4,6 kinase substrate motif;ERK1,2 kinase substrate motif;G protein-coupled receptor kinase 1 substrate motif;GSK3 kinase substrate motif;GSK-3, ERK1, ERK2, CDK5 substrate motif;WW domain binding motif
-0.120351	-0.300882	-0.319943	-0.082665	0.524206	0.0762621	0.612822	-0.339066	-0.527004	-0.449765	-0.15915	-0.29776	NaN	0.144964	-0.257514	-0.426666	-0.535323	-0.086282	NaN	-0.33201	-0.103233	-0.230011	0.0328096	NaN	NaN	-0.232815	NaN	-0.0722568	-0.325183	-0.353844	-0.0586808	-0.124678	-0.257426	-0.404918	-0.0998863	0.126879	-0.154814	-0.70373	-0.373061	-0.551975	-0.31782	-0.231413	-0.287623	0.0562106	0.498686	0.219803	S	3	___1	Casein kinase I substrate motif;Casein kinase II substrate motif;G protein-coupled receptor kinase 1 substrate motif;GSK3 kinase substrate motif;PKA kinase substrate motif;PKC kinase substrate motif
0.824531	1.13666	0.550413	0.92953	0.677007	NaN	0.775527	0.849487	0.948246	NaN	1.63265	1.15771	NaN	1.02447	1.19934	0.929883	0.272545	NaN	0.600948	0.623738	0.973228	1.21388	NaN	NaN	NaN	0.628233	NaN	0.770965	1.38543	1.32021	1.05727	NaN	NaN	-0.160952	1.54321	1.23974	0.185657	NaN	NaN	0.763869	0.598805	0.92953	0.914117	0.0154129	0.460106	0.910297	S	4	___1	14-3-3 domain binding motif;AMP-activated protein kinase 2 substrate motif;b-Adrenergic Receptor kinase substrate motif;Calmodulin-dependent protein kinase II substrate motif;MAPKAPK1 kinase substrate motif;PKA kinase substrate motif;PKC kinase substrate motif
-0.105291	-0.21922	NaN	NaN	0.453952	-0.196458	NaN	-0.396915	-0.230695	-0.461433	-0.225486	0.0410949	NaN	0.493022	-0.404345	-0.178783	-0.543957	0.0883296	NaN	-0.346746	0.249402	0.05759	0.0593846	NaN	NaN	NaN	-0.32991	-0.182219	-0.321051	-0.429868	0.159592	-0.337385	-0.514786	-0.46697	0.142773	NaN	-0.460129	-0.522503	-0.404795	-0.470786	-0.167885	-0.18762	-0.37109	0.18347	0.343645	0.034928	S	3	___1	ERK1,2 kinase substrate motif;GSK-3, ERK1, ERK2, CDK5 substrate motif;WW domain binding motif
-0.267416	-0.160635	-0.175023	0.0759524	0.00394196	-0.0633015	-0.190278	0.0240015	-0.115896	-0.330602	-0.113644	-0.0915974	0.144988	0.12449	-0.424691	-0.140164	-0.529626	0.112498	0.428923	-0.198289	0.0761344	-0.123478	-0.185795	-0.00826343	0.373231	0.124473	0.0144448	-0.199876	-0.317145	-0.336378	0.0295535	-0.119201	-0.57998	-0.357741	-0.0810495	-0.1542	-0.386892	-0.325346	NaN	-0.579299	-0.323144	-0.102621	-0.320145	0.217524	0.305246	0.00473202	S	3	___1	14-3-3 domain binding motif;AMP-activated protein kinase substrate motif;b-Adrenergic Receptor kinase substrate motif;Calmodulin-dependent protein kinase II substrate motif;Cdc2 kinase substrate motif;CDK kinase substrate motif;CDK1,2,4,6 kinase substrate motif;CLK1 kinase substrate motif;ERK1,2 kinase substrate motif;GSK-3, ERK1, ERK2, CDK5 substrate motif;HMGCoA Reductase kinase substrate motif…
0.0123511	-0.187789	-0.099107	-0.350734	0.089806	-0.77529	-0.292263	-0.442682	-0.261353	-0.674544	-0.160926	-0.17426	1.26112	0.447097	0.0929988	-0.32682	-0.493932	NaN	0.836918	-0.6316	0.0968974	-0.174929	-0.0473667	0.842337	0.455909	-0.129534	-0.133272	-0.720127	NaN	NaN	0.469273	-0.459326	-0.392385	-0.485861	0.0131205	-0.0666898	-0.735161	-0.500191	-0.457876	-0.543911	-0.959901	-0.160926	-0.459326	0.298399	0.222703	0.0242026	S	2	___1	Casein kinase I substrate motif;Casein kinase II substrate motif;ERK1,2 kinase substrate motif;GSK-3, ERK1, ERK2, CDK5 substrate motif;PKA kinase substrate motif;WW domain binding motif
-0.409092	NaN	-0.199907	-0.21612	0.331436	-0.226394	-0.0350286	NaN	-0.230084	-0.660301	-0.215821	-0.0897363	NaN	0.079203	-0.183548	-0.244753	-0.487546	-0.122831	NaN	NaN	-0.03455	-0.234402	-0.271284	NaN	NaN	NaN	0.20824	-0.132368	-0.576379	-0.652631	-0.0695297	NaN	-0.543629	-0.477171	-0.0657677	NaN	NaN	-0.401693	-0.692831	-0.553926	-0.377998	-0.21597	-0.439432	0.223462	0.29875	0.0926803	S	2	___1	b-Adrenergic Receptor kinase substrate motif;Casein kinase II substrate motif;G protein-coupled receptor kinase 1 substrate motif;PKA kinase substrate motif;Pyruvate dehydrogenase kinase substrate motif
NaN	NaN	NaN	-0.598787	NaN	-0.274787	NaN	-0.427093	NaN	-2.0311	NaN	-1.41411	NaN	-1.28118	NaN	-1.51695	-1.51503	-0.408077	NaN	NaN	-1.59573	NaN	NaN	NaN	NaN	NaN	-2.33271	NaN	NaN	0.42435	-0.651531	-0.935504	-1.89334	NaN	-0.675915	NaN	NaN	NaN	-1.32956	-1.67788	NaN	-1.34765	-1.13253	-0.215114	0.247901	0.940458	S	3	___1	b-Adrenergic Receptor kinase substrate motif;PKA kinase substrate motif;PKC kinase substrate motif
-0.541344	-0.327014	-0.310927	-0.359985	0.137496	-0.0746385	-0.122179	-0.824358	-0.212542	-0.795808	-0.270706	-0.19625	-0.0248672	0.0501931	-0.473677	-0.298439	-0.617477	-0.0626126	0.516012	-0.398491	-0.0963508	-0.188834	-0.270301	-0.0536193	NaN	0.00490305	-0.381078	-0.25531	-0.536907	-0.352208	-0.135866	-0.476877	-0.764556	-0.431216	-0.167983	-0.234461	-0.494616	-0.453053	-0.602567	-0.529753	-0.423542	-0.212542	-0.431216	0.218674	0.303983	0.0159218	S	2	___1	Casein kinase II substrate motif;ERK1,2 kinase substrate motif;GSK-3, ERK1, ERK2, CDK5 substrate motif;WW domain binding motif
-0.892539	-1.10597	-0.452854	-0.672727	-0.106536	-0.629356	-0.441121	-1.04782	-0.0443344	-1.37804	-0.580137	-1.01151	-0.342732	-0.3684	-0.786428	-0.492928	-0.893059	-0.720953	-0.531702	-1.11373	-0.66938	-0.607855	-0.802042	-0.914715	-0.444142	-1.04633	-1.11226	-0.69028	NaN	-0.593511	-0.724533	-1.20479	-0.641178	-0.4722	-0.586231	-0.485069	-0.757904	-0.522889	-1.04623	-0.512988	-0.264057	-0.671054	-0.617345	-0.053709	0.391905	0.922632	S	2	___1	Casein kinase II substrate motif;Cdc2 kinase substrate motif;CDK kinase substrate motif;CDK1,2,4,6 kinase substrate motif;ERK1,2 kinase substrate motif;G protein-coupled receptor kinase 1 substrate motif;GSK3 kinase substrate motif;GSK-3, ERK1, ERK2, CDK5 substrate motif;MAPKAPK2 kinase substrate motif;WW domain binding motif
-0.38473	-0.0984821	-0.0945587	-0.189617	0.167414	-0.11135	0.0626862	0.135558	-0.308467	-0.484673	-0.306841	-0.264351	0.154085	-0.00814894	-0.347286	-0.252121	-0.456165	-0.0384847	0.919228	-0.333562	-0.173644	-0.0317274	-0.259724	-0.0972891	0.3592	-0.0261456	-0.178617	-0.251729	-0.220222	-0.559575	-0.19393	-0.442995	-0.579169	-0.302823	-0.132311	-0.13411	-0.783852	-0.27884	-0.405268	-0.355955	-0.0535176	-0.104916	-0.27884	0.173923	0.354728	0.00496998	S	3	___1	14-3-3 domain binding motif;Calmodulin-dependent protein kinase II substrate motif;Casein kinase II substrate motif;ERK1,2 kinase substrate motif;Growth associated histone HI kinase substrate motif;GSK-3, ERK1, ERK2, CDK5 substrate motif;PKA kinase substrate motif;PKC kinase substrate motif;WW domain binding motif
-1.54213	-1.7428	-0.526707	-1.43327	-0.258613	-1.80161	-0.245241	-1.86629	-0.65973	-1.9683	-1.27804	-1.87084	-0.993914	-0.979384	-1.68655	-1.43125	-1.53983	-1.53946	-1.77619	-1.81759	-1.50815	-1.29125	-0.992455	-1.767	NaN	-1.24915	NaN	NaN	-1.8056	NaN	-1.28249	-1.3887	-1.15001	-1.27866	-1.54242	-2.15227	-1.46339	-0.954282	-1.42141	-2.17471	-0.834578	-1.50815	-1.40505	-0.103096	0.345014	0.516935	S	2	___1	Casein kinase II substrate motif;ERK1,2 kinase substrate motif;GSK-3, ERK1, ERK2, CDK5 substrate motif;MAPKAPK2 kinase substrate motif;PKA kinase substrate motif;PKC kinase substrate motif;WW domain binding motif
-0.688621	-0.417595	NaN	0.0195641	0.361622	-0.310659	NaN	-0.437721	0.301112	-1.14213	-0.66731	-0.451049	0.716249	0.118405	-0.844257	-0.000474517	-0.430507	-0.158602	-0.709172	-0.342958	-0.0517482	-0.598459	-0.370518	-0.590462	NaN	-0.0936105	NaN	-0.230806	-0.665703	-0.508101	-0.0412575	-0.839978	-0.358028	-0.54221	0.0571368	NaN	-0.726769	-0.489137	NaN	NaN	-0.0455558	-0.370518	-0.489137	0.118619	0.421099	0.421095	S	3	___1	ERK1,2 kinase substrate motif;GSK-3, ERK1, ERK2, CDK5 substrate motif;WW domain binding motif
NaN	NaN	NaN	NaN	NaN	-1.53282	NaN	-1.59779	-0.715671	-1.86975	-2.3467	-1.46897	NaN	-0.506703	-1.37128	NaN	-1.37213	-1.1185	NaN	NaN	-0.561232	-0.97273	-0.864662	NaN	NaN	NaN	NaN	-1.82432	NaN	-2.28364	-1.27515	-1.30036	-0.98081	-1.10485	-0.846215	-1.18765	NaN	0.217854	NaN	NaN	-1.08677	-1.37128	-1.14625	-0.225035	0.24006	0.736042	S	3	___1	ATM kinase substrate motif;Casein kinase II substrate motif;DNA dependent Protein kinase substrate motif;G protein-coupled receptor kinase 1 substrate motif;PKA kinase substrate motif;PKC kinase substrate motif
-0.204557	-0.187096	NaN	0.341431	0.896677	0.450842	1.42331	NaN	NaN	-0.0158459	0.398003	0.00123091	NaN	0.26152	0.263069	-0.310914	0.342774	0.53285	NaN	0.0772247	0.0692397	1.01467	0.57883	NaN	NaN	0.989161	NaN	0.819331	0.562414	0.463636	0.662156	0.121008	0.255988	0.343952	0.00725823	0.858911	0.327019	0.386742	0.480852	NaN	0.741291	0.341431	0.463636	-0.122205	0.327448	0.444602	S	3	___1	ERK1, ERK2, SAPK, CDK5 and GSK3 kinase substrate motif;ERK1,2 kinase substrate motif;Growth associated histone HI kinase substrate motif;GSK-3, ERK1, ERK2, CDK5 substrate motif;PKA kinase substrate motif;WW domain binding motif
0.283139	0.3497	NaN	0.701216	0.834572	0.380669	-0.0192068	0.380994	0.0396573	0.0078113	0.58889	0.603693	NaN	0.925015	0.319632	0.345492	0.0339752	1.1216	NaN	-0.0882614	0.901036	0.64868	0.636215	NaN	NaN	0.573134	NaN	0.124226	0.176494	-0.206952	0.935538	NaN	-0.446084	-0.234251	0.7364	-0.0852234	0.173814	-0.358777	0.0811268	-0.0832073	0.1392	0.380994	0.0811268	0.299867	0.221333	0.00864112	S	3	___2	Casein kinase I substrate motif;Casein kinase II substrate motif;G protein-coupled receptor kinase 1 substrate motif;GSK3 kinase substrate motif;PKA kinase substrate motif;PKC kinase substrate motif
0.283139	0.3497	NaN	0.701216	0.834572	0.380669	-0.0192068	0.380994	0.0396573	0.0078113	0.58889	0.603693	NaN	0.925015	0.319632	0.345492	0.0339752	1.1216	NaN	-0.0882614	0.901036	0.64868	0.636215	NaN	NaN	0.573134	NaN	0.124226	0.176494	-0.206952	0.935538	NaN	-0.446084	-0.234251	0.7364	-0.0852234	0.173814	-0.358777	0.0811268	-0.0832073	0.1392	0.380994	0.0811268	0.299867	0.221333	0.00864112	S	3	___2	b-Adrenergic Receptor kinase substrate motif;Casein kinase I substrate motif;MAPKAPK2 kinase substrate motif;PKA kinase substrate motif;PKC kinase substrate motif
-0.853781	-0.681599	-0.573095	-0.277628	0.245931	-0.34372	-0.45715	-0.537124	NaN	-0.8672	0.314588	-0.273297	0.233506	0.115597	NaN	-0.436591	-0.757978	NaN	-0.413851	-0.355584	-0.392158	-0.371465	-0.559462	-0.275324	-0.108233	-0.132024	-0.535829	-0.253582	NaN	-0.46773	-0.266176	-0.297091	-0.746898	-0.22685	-0.273095	-0.172369	-0.127596	-0.785707	-0.967753	-0.635443	-0.404262	-0.371465	-0.350676	-0.0207882	0.424108	0.301311	S	2	___2	Casein kinase II substrate motif;Cdc2 kinase substrate motif;CDK kinase substrate motif;CDK1,2,4,6 kinase substrate motif;ERK1,2 kinase substrate motif;G protein-coupled receptor kinase 1 substrate motif;GSK3 kinase substrate motif;GSK-3, ERK1, ERK2, CDK5 substrate motif;MAPKAPK2 kinase substrate motif;WW domain binding motif
-0.817031	-0.738796	-0.438472	-0.412183	-0.0322065	-0.385618	-0.645663	-0.561827	-0.119806	-1.18923	-0.249243	-0.559296	0.0225961	0.0450298	-0.818926	-0.454045	-0.620047	-0.228967	-0.465474	-0.706185	-0.14318	-0.613734	-1.02445	-0.679237	0.119286	-0.59014	-0.593746	-0.086445	-0.806507	-0.628514	-0.289027	-0.992279	-0.59425	-0.516715	-0.151766	-0.778758	-0.626438	-0.718755	-0.849082	-1.08631	-0.211793	-0.512385	-0.626438	0.114053	0.426709	0.23633	S	2	___2	Casein kinase II substrate motif;ERK1,2 kinase substrate motif;GSK-3, ERK1, ERK2, CDK5 substrate motif;MAPKAPK2 kinase substrate motif;PKA kinase substrate motif;PKC kinase substrate motif;WW domain binding motif
-0.819435	-0.781071	-0.429705	-0.413745	0.00972008	-0.389498	-0.462554	-0.730527	-0.0913664	-1.08767	-0.313537	-0.579101	0.0225961	-0.153383	-0.82078	-0.465288	-0.652239	-0.423138	-0.465474	-0.638801	-0.219339	-0.614407	-0.869323	-0.679237	0.0626517	-0.600251	-0.593746	-0.421309	-0.750983	-0.628514	-0.363947	-0.838118	-0.642351	-0.479831	-0.310945	-0.831773	-0.724331	-0.599744	-0.849082	-1.14946	-0.222503	-0.465381	-0.628514	0.163134	0.367404	0.106096	S	3	___2	ERK1,2 kinase substrate motif;GSK-3, ERK1, ERK2, CDK5 substrate motif;WW domain binding motif
-1.22664	NaN	-0.457887	0.0231713	0.245931	-0.34372	NaN	-0.537124	NaN	-0.8672	0.442665	NaN	NaN	0.336729	NaN	NaN	NaN	NaN	-0.413851	NaN	-0.683617	NaN	-0.559462	NaN	NaN	0.428342	-0.841199	-0.253582	NaN	-0.395975	-0.272195	-0.297091	-0.963141	-0.22685	-0.0300233	-0.192087	NaN	-0.785707	-0.967753	-0.635443	-0.404262	-0.413851	-0.395975	-0.0178761	0.426984	0.248109	T	3	___2	GSK-3, ERK1, ERK2, CDK5 substrate motif;MAPKAPK2 kinase substrate motif;PKA kinase substrate motif;PKC kinase substrate motif;WW domain binding motif
0.43681	NaN	-0.00286282	0.266321	NaN	0.0944221	NaN	NaN	NaN	NaN	0.914367	NaN	NaN	NaN	-0.227669	NaN	0.394965	NaN	NaN	NaN	0.549566	NaN	NaN	NaN	0.338041	NaN	-0.283003	NaN	NaN	-0.772724	0.854535	NaN	-0.0691061	NaN	NaN	NaN	NaN	NaN	NaN	-0.153224	NaN	0.338041	-0.153224	0.491265	0.0856311	0.225635	S	3	___3	ATM kinase substrate motif;Casein kinase II substrate motif;DNA dependent Protein kinase substrate motif;PKA kinase substrate motif
0.43681	NaN	-0.00286282	0.266321	NaN	0.0944221	NaN	NaN	NaN	NaN	0.914367	NaN	NaN	NaN	-0.227669	NaN	0.394965	NaN	NaN	NaN	0.549566	NaN	NaN	NaN	0.338041	NaN	-0.283003	NaN	NaN	-0.772724	0.854535	NaN	-0.0691061	NaN	NaN	NaN	NaN	NaN	NaN	-0.153224	NaN	0.338041	-0.153224	0.491265	0.0856311	0.225635	S	3	___3	G protein-coupled receptor kinase 1 substrate motif;GSK3 kinase substrate motif
0.43681	NaN	-0.00286282	0.266321	NaN	0.0944221	NaN	NaN	NaN	NaN	0.914367	NaN	NaN	NaN	-0.227669	NaN	0.394965	NaN	NaN	NaN	0.549566	NaN	NaN	NaN	0.338041	NaN	-0.283003	NaN	NaN	-0.772724	0.854535	NaN	-0.0691061	NaN	NaN	NaN	NaN	NaN	NaN	-0.153224	NaN	0.338041	-0.153224	0.491265	0.0856311	0.225635	S	2	___3	Casein kinase II substrate motif;Cdc2 kinase substrate motif;CDK kinase substrate motif;CDK1,2,4,6 kinase substrate motif;ERK1,2 kinase substrate motif;G protein-coupled receptor kinase 1 substrate motif;GSK3 kinase substrate motif;GSK-3, ERK1, ERK2, CDK5 substrate motif;MAPKAPK2 kinase substrate motif;WW domain binding motif
NaN	NaN	-0.530303	NaN	-0.219332	NaN	-0.711275	NaN	NaN	-1.23761	NaN	-0.803628	NaN	NaN	NaN	NaN	NaN	-0.472504	NaN	-0.877352	NaN	NaN	NaN	NaN	NaN	NaN	-0.899857	NaN	NaN	NaN	NaN	NaN	-0.764071	NaN	-0.655284	-1.02989	NaN	-0.828108	-1.86462	NaN	NaN	-0.711275	-0.863982	0.152707	0.379792	0.182614	S	2	___3	Casein kinase II substrate motif;ERK1,2 kinase substrate motif;GSK-3, ERK1, ERK2, CDK5 substrate motif;MAPKAPK2 kinase substrate motif;PKA kinase substrate motif;PKC kinase substrate motif;WW domain binding motif
NaN	NaN	-0.522807	NaN	-0.219332	NaN	-0.711275	NaN	NaN	-1.23761	NaN	-0.803628	NaN	NaN	NaN	NaN	NaN	-1.49005	NaN	-0.877352	NaN	NaN	NaN	NaN	NaN	NaN	-0.899857	NaN	NaN	NaN	NaN	NaN	-0.764071	NaN	-0.655284	-1.02989	NaN	-0.828108	-1.86462	NaN	NaN	-0.803628	-0.863982	0.0603545	0.4935	0.496388	S	3	___3	ERK1,2 kinase substrate motif;GSK-3, ERK1, ERK2, CDK5 substrate motif;WW domain binding motif
NaN	-1.00575	NaN	-0.315326	NaN	NaN	NaN	-0.560136	0.370606	NaN	-0.572621	NaN	NaN	-0.361196	-1.24585	NaN	NaN	0.256979	NaN	-0.50657	-0.422052	NaN	NaN	-1.19829	NaN	-0.625267	NaN	NaN	NaN	-1.14787	-0.254161	NaN	-1.18763	-1.09197	-0.523787	NaN	-1.24209	-0.798878	-0.568359	NaN	NaN	-0.533353	-0.945425	0.412072	0.131418	0.100419	S	2	___1	Casein kinase I substrate motif;ERK1,2 kinase substrate motif;GSK-3, ERK1, ERK2, CDK5 substrate motif;MDC1 BRCT domain binding motif;PKA kinase substrate motif;Plk1 PBD domain binding motif;WW domain binding motif
NaN	NaN	NaN	-1.02066	-0.562978	NaN	-1.25552	NaN	NaN	-1.9531	NaN	-0.830808	NaN	NaN	-1.8849	-1.71417	-1.16922	NaN	NaN	-1.52922	NaN	NaN	-1.02746	NaN	NaN	NaN	NaN	NaN	-1.28955	-1.39874	-0.436235	NaN	-2.35601	-2.4601	-1.26145	NaN	-2.01211	-0.510079	NaN	NaN	NaN	-1.21237	-1.34415	0.131772	0.40503	0.591097	S	3	___1	14-3-3 domain binding motif;Akt kinase substrate motif;Calmodulin-dependent protein kinase II substrate motif;Casein kinase II substrate motif;G protein-coupled receptor kinase 1 substrate motif;GSK3 kinase substrate motif;MAPKAPK1 kinase substrate motif;Pim1 kinase substrate sequence;PKA kinase substrate motif;PKC epsilon kinase substrate motif;PKC kinase substrate motif
0.819287	1.80052	NaN	1.02507	NaN	NaN	NaN	NaN	0.974801	NaN	0.878599	1.54751	NaN	NaN	NaN	NaN	0.636282	1.23234	NaN	1.82378	1.11302	NaN	NaN	NaN	NaN	0.585179	NaN	NaN	NaN	NaN	1.22654	NaN	NaN	0.28844	1.16552	0.702885	0.400054	0.667194	NaN	NaN	NaN	1.02507	0.68504	0.340029	0.185742	0.082099	S	3	___1	14-3-3 domain binding motif;Calmodulin-dependent protein kinase II substrate motif;Casein kinase II substrate motif;MAPKAPK2 kinase substrate motif;PAK2 kinase substrate motif;PKA kinase substrate motif;PKC epsilon kinase substrate motif;PKC kinase substrate motif
NaN	-2.51021	NaN	-2.48843	-2.77812	-3.98584	-3.72678	-3.38112	-3.07537	-1.48397	-3.03531	-2.49026	NaN	-2.95601	-3.177	-2.91411	-1.7533	-2.64478	-2.96576	NaN	-2.50589	NaN	-4.3456	NaN	NaN	-2.94827	NaN	-2.67692	-1.16793	-2.88058	NaN	-1.56231	NaN	-4.50294	-3.47827	NaN	-3.05502	-2.07901	-2.56415	-1.88511	-1.96143	-2.94827	-2.56415	-0.384119	0.134144	0.265806	S	2	___1	Casein kinase II substrate motif;Phosphorylase kinase substrate motif;PKA kinase substrate motif;PKC kinase substrate motif
NaN	-0.59449	0.254578	0.774405	-0.572242	NaN	-1.77642	-0.920531	-0.345699	-1.52476	-0.917878	-1.1002	NaN	-0.593768	0.191931	-0.738636	-0.846597	-0.426997	-1.58227	-0.948701	-1.58388	-1.23899	-0.504634	NaN	NaN	-0.36454	NaN	NaN	-0.939787	NaN	-0.894511	0.274619	-1.03634	-1.36757	-0.866158	-1.06386	-1.53635	-0.942051	-1.54166	-1.73857	NaN	-0.738636	-1.03634	0.297703	0.223355	0.13939	S	3	___1	14-3-3 domain binding motif;Calmodulin-dependent protein kinase II substrate motif;ERK1,2 kinase substrate motif;GSK-3, ERK1, ERK2, CDK5 substrate motif;PKA kinase substrate motif;PKC kinase substrate motif;WW domain binding motif
1.31143	NaN	1.70573	1.06566	-1.3873	0.15219	NaN	1.00371	-1.18778	1.23306	1.41849	NaN	NaN	-0.874372	NaN	1.73395	1.49224	0.64431	NaN	0.702148	0.13335	0.367546	0.279702	NaN	NaN	1.55354	NaN	1.69276	0.727977	0.669568	-0.147384	2.12065	1.5005	-0.540585	1.14706	NaN	1.26037	NaN	NaN	NaN	NaN	0.852928	1.14706	-0.294127	0.189368	0.414656	S	3	___1	14-3-3 domain binding motif;Calmodulin-dependent protein kinase II alpha substrate motif;Calmodulin-dependent protein kinase II substrate motif;Calmodulin-dependent protein kinase IV substrate motif;Chk1 kinase substrate motif;Phosphorylase kinase substrate motif;PKA kinase substrate motif;PKC kinase substrate motif
-0.146292	NaN	NaN	-0.810477	-0.31646	-0.270705	-0.329709	0.0465409	-0.486959	0.318789	0.527752	-0.85985	-2.279	-0.720542	0.632014	0.0321419	0.597478	-0.592547	-0.7032	-0.416818	-0.469003	0.321405	0.0309414	-0.886364	NaN	0.183094	NaN	-0.263919	0.354426	0.206973	-0.256551	-0.027579	0.0941951	0.671489	-0.518198	0.539022	0.529374	0.726303	0.195066	0.755159	0.345006	-0.31646	0.275989	-0.592449	0.0513377	0.00402574	S	2	___1	ERK1,2 kinase substrate motif;Growth associated histone HI kinase substrate motif;GSK-3, ERK1, ERK2, CDK5 substrate motif;PKA kinase substrate motif;PKC kinase substrate motif;WW domain binding motif
2.79754	NaN	1.97172	NaN	NaN	NaN	NaN	NaN	NaN	3.25116	NaN	2.85691	NaN	NaN	NaN	2.50451	NaN	NaN	NaN	-1.74317	NaN	NaN	NaN	NaN	NaN	NaN	NaN	NaN	NaN	2.14784	2.28154	3.49439	NaN	NaN	1.55542	NaN	NaN	3.266	NaN	NaN	NaN	2.65103	2.28154	0.369485	0.16204	0.491044	S	3	___2	Casein kinase II substrate motif;ERK1,2 kinase substrate motif;G protein-coupled receptor kinase 1 substrate motif;Growth associated histone HI kinase substrate motif;GSK-3, ERK1, ERK2, CDK5 substrate motif;PKA kinase substrate motif;WW domain binding motif
2.79754	NaN	1.97172	NaN	NaN	NaN	NaN	1.36591	NaN	3.25116	NaN	2.85691	NaN	NaN	NaN	2.50451	NaN	NaN	NaN	-1.74317	NaN	NaN	NaN	NaN	NaN	NaN	NaN	NaN	NaN	2.14784	2.28154	3.49439	NaN	NaN	1.55542	NaN	NaN	3.266	NaN	NaN	NaN	2.50451	2.28154	0.222972	0.299283	0.374348	S	3	___2	Casein kinase II substrate motif;DNA dependent Protein kinase substrate motif;ERK1,2 kinase substrate motif;GSK-3, ERK1, ERK2, CDK5 substrate motif;PKA kinase substrate motif;PKC kinase substrate motif;Pyruvate dehydrogenase kinase substrate motif;WW domain binding motif
1.60475	NaN	NaN	0.769931	NaN	1.81551	NaN	NaN	NaN	NaN	0.390868	1.46441	NaN	NaN	2.37125	1.59854	2.44428	NaN	NaN	1.13669	1.25056	1.79747	NaN	NaN	NaN	NaN	NaN	NaN	1.59711	1.86878	1.24375	NaN	2.44067	NaN	0.4182	NaN	3.23166	2.46919	2.23025	NaN	1.87625	1.59854	1.87625	-0.277709	0.200776	0.221586	S	3	___1	14-3-3 domain binding motif;ATM kinase substrate motif;Calmodulin-dependent protein kinase II substrate motif;Casein kinase II substrate motif;DNA dependent Protein kinase substrate motif;PKA kinase substrate motif;PKC kinase substrate motif
1.97446	NaN	0.800186	1.81836	-0.193757	2.57964	1.83844	1.65126	-0.361156	0.672383	1.80821	1.53383	NaN	NaN	NaN	1.37504	2.1659	NaN	NaN	1.69152	1.7574	1.20707	1.28645	2.16702	NaN	2.13535	NaN	1.50678	1.93885	2.57665	1.16505	1.60018	2.17479	2.22541	NaN	NaN	2.16732	1.8247	2.17047	2.41142	NaN	1.69152	2.16732	-0.475797	0.0904406	0.0268444	S	2	___1	Casein kinase II substrate motif;ERK1,2 kinase substrate motif;G protein-coupled receptor kinase 1 substrate motif;Growth associated histone HI kinase substrate motif;GSK3 kinase substrate motif;GSK-3, ERK1, ERK2, CDK5 substrate motif;PKA kinase substrate motif;PKC kinase substrate motif;WW domain binding motif
3.36769	3.3901	3.49627	4.34634	0.235659	2.98659	3.36553	4.0018	0.806257	3.60313	0.077281	2.95507	NaN	2.33486	3.45908	3.33443	3.88885	0.996155	NaN	2.53467	2.30086	0.661966	0.917948	3.0225	NaN	4.00091	NaN	1.96391	2.1207	2.6592	3.34239	3.68374	3.23669	3.55718	2.47252	-0.79498	3.65868	3.38352	3.00389	2.71198	2.64709	3.0225	2.85793	0.164569	0.365709	0.853489	S	2	___1	G protein-coupled receptor kinase 1 substrate motif;GSK3 kinase substrate motif;MAPKAPK2 kinase substrate motif;PKA kinase substrate motif;PKC kinase substrate motif
NaN	0.599677	NaN	NaN	NaN	0.319734	NaN	NaN	-0.524449	0.487365	-0.0364465	0.436949	NaN	-0.675852	0.82246	0.649734	1.21242	NaN	NaN	0.352888	-0.115098	0.480491	NaN	-0.171473	NaN	NaN	NaN	-0.125644	0.846622	1.00169	-0.657894	NaN	1.7171	0.311576	NaN	NaN	NaN	0.962118	0.759931	NaN	NaN	0.394918	0.803276	-0.408358	0.121384	0.291667	T	4	___1	Growth associated histone HI kinase substrate motif;GSK-3, ERK1, ERK2, CDK5 substrate motif;PKA kinase substrate motif;WW domain binding motif
2.16138	2.02645	1.40129	3.9994	-0.855328	NaN	0.907698	NaN	NaN	2.02223	NaN	1.95361	NaN	NaN	1.886	2.14987	2.42288	1.11961	NaN	2.00635	1.38145	1.85161	NaN	NaN	NaN	2.44896	NaN	NaN	1.77177	NaN	NaN	NaN	NaN	NaN	0.663674	1.64543	NaN	NaN	2.05832	1.95855	2.40571	1.97998	1.86516	0.114823	0.425762	0.876725	S	3	___2	Casein kinase II substrate motif;ERK1,2 kinase substrate motif;G protein-coupled receptor kinase 1 substrate motif;GSK3 kinase substrate motif;GSK-3, ERK1, ERK2, CDK5 substrate motif;MDC1 BRCT domain binding motif;Plk1 PBD domain binding motif;WW domain binding motif
2.04992	2.02645	0.624051	2.78353	0.0201119	3.63609	3.99438	2.78068	NaN	2.02223	2.66914	1.95361	NaN	-0.243577	2.8121	0.89958	2.42288	0.953745	NaN	1.11678	1.48472	1.85161	2.04549	NaN	NaN	2.44896	NaN	NaN	1.56391	2.01428	2.54842	NaN	2.37318	2.52609	0.663674	2.74767	3.9851	2.96345	2.61213	2.42908	2.82719	2.02645	2.53726	-0.510811	0.076893	0.129441	S	4	___2	Casein kinase II substrate motif;ERK1,2 kinase substrate motif;G protein-coupled receptor kinase 1 substrate motif;GSK-3, ERK1, ERK2, CDK5 substrate motif;MAPKAPK2 kinase substrate motif;WW domain binding motif
3.1035	NaN	NaN	4.28585	NaN	NaN	NaN	NaN	NaN	2.74864	NaN	1.58468	NaN	NaN	2.3946	2.5632	2.66937	NaN	NaN	2.38258	NaN	NaN	NaN	NaN	NaN	NaN	NaN	NaN	NaN	2.40214	NaN	3.16645	2.03193	NaN	NaN	NaN	2.32161	1.6458	NaN	NaN	NaN	2.61628	2.32161	0.294679	0.226199	0.300276	S	2	___2	G protein-coupled receptor kinase 1 substrate motif;GSK3 kinase substrate motif;MAPKAPK2 kinase substrate motif;PKA kinase substrate motif;PKC kinase substrate motif
3.1035	NaN	NaN	4.28585	NaN	NaN	NaN	NaN	NaN	2.74864	NaN	1.58468	NaN	NaN	2.3946	2.5632	2.66937	NaN	NaN	2.38258	NaN	NaN	NaN	NaN	NaN	NaN	NaN	NaN	NaN	2.40214	NaN	3.16645	2.03193	NaN	NaN	NaN	2.32161	1.6458	NaN	NaN	NaN	2.61628	2.32161	0.294679	0.226199	0.300276	S	2	___2	ERK1,2 kinase substrate motif;GSK-3, ERK1, ERK2, CDK5 substrate motif;MAPKAPK2 kinase substrate motif;WW domain binding motif
0.446009	NaN	0.198602	NaN	-1.96562	-0.589046	NaN	0.115296	-1.39087	NaN	-0.652452	-0.64947	NaN	-0.328315	0.0329328	0.608288	0.675837	0.810524	NaN	0.324761	-0.966848	NaN	NaN	0.108214	NaN	0.725951	-0.180718	-0.157374	0.738501	1.03674	NaN	NaN	-0.354322	-0.920122	-1.13136	-0.651493	0.664645	NaN	NaN	NaN	NaN	0.108214	-0.180718	0.288932	0.231659	0.900244	S	2	___2	Casein kinase II substrate motif;ERK1,2 kinase substrate motif;G protein-coupled receptor kinase 1 substrate motif;GSK3 kinase substrate motif;GSK-3, ERK1, ERK2, CDK5 substrate motif;MDC1 BRCT domain binding motif;Plk1 PBD domain binding motif;WW domain binding motif
0.446009	0.262007	0.198602	1.41434	-1.96562	-0.589046	-1.2683	-0.653026	-1.39087	0.310421	-0.652452	-0.64947	NaN	-0.797065	0.0329328	0.608288	0.675837	0.441246	NaN	0.324761	-0.966848	0.000245472	-1.0756	0.108214	NaN	0.725951	-0.180718	-0.157374	0.738501	1.03674	-1.27373	NaN	-0.354322	-0.920122	-1.18437	-0.651493	0.664645	0.96344	0.968669	NaN	0.0373205	0.0329328	-0.157374	0.190306	0.335789	0.561876	S	2	___2	Casein kinase II substrate motif;ERK1,2 kinase substrate motif;G protein-coupled receptor kinase 1 substrate motif;GSK-3, ERK1, ERK2, CDK5 substrate motif;MAPKAPK2 kinase substrate motif;WW domain binding motif
3.031	NaN	NaN	4.06436	NaN	NaN	NaN	0.79251	NaN	1.34687	2.06321	NaN	NaN	NaN	2.17067	1.14164	2.51353	NaN	NaN	2.62561	NaN	NaN	NaN	NaN	NaN	1.04773	0.0538182	NaN	NaN	1.62586	NaN	1.82805	1.37853	NaN	NaN	NaN	2.34071	2.76378	1.20208	NaN	2.83246	2.11694	1.72695	0.389982	0.146765	0.486924	S	3	___2	Casein kinase II substrate motif;ERK1,2 kinase substrate motif;GSK-3, ERK1, ERK2, CDK5 substrate motif;WW domain binding motif
3.031	NaN	NaN	4.06436	NaN	NaN	NaN	NaN	NaN	NaN	2.06321	NaN	NaN	NaN	2.17067	1.14164	2.51353	NaN	NaN	2.62561	NaN	NaN	NaN	NaN	NaN	NaN	NaN	NaN	NaN	2.18406	NaN	1.82805	1.37853	NaN	NaN	NaN	2.34071	2.76378	NaN	NaN	2.83246	2.51353	2.26238	0.251143	0.269329	0.488766	S	2	___2	Casein kinase II substrate motif;PKA kinase substrate motif;PKC kinase substrate motif
2.2699	1.89524	1.21106	3.999	NaN	NaN	3.51463	NaN	NaN	NaN	NaN	NaN	NaN	NaN	2.05888	NaN	NaN	NaN	NaN	1.6386	NaN	NaN	NaN	NaN	NaN	2.93252	NaN	NaN	NaN	2.7064	NaN	NaN	2.59287	1.39358	0.146987	1.14027	NaN	2.17677	NaN	2.09588	NaN	2.16439	2.09588	0.0685135	0.483293	0.177888	S	3	___3	Casein kinase II substrate motif;ERK1,2 kinase substrate motif;G protein-coupled receptor kinase 1 substrate motif;GSK3 kinase substrate motif;GSK-3, ERK1, ERK2, CDK5 substrate motif;MDC1 BRCT domain binding motif;Plk1 PBD domain binding motif;WW domain binding motif
2.2699	NaN	1.21106	3.33044	NaN	NaN	3.30129	NaN	NaN	NaN	NaN	NaN	NaN	NaN	2.05888	NaN	NaN	NaN	NaN	1.60791	NaN	NaN	NaN	NaN	NaN	2.93252	NaN	NaN	1.50986	0.970261	NaN	NaN	2.59287	1.39358	0.146987	1.14027	2.35699	2.34877	NaN	2.09588	NaN	2.2699	1.50986	0.760038	0.0135054	0.0846162	S	4	___3	Casein kinase II substrate motif;ERK1,2 kinase substrate motif;G protein-coupled receptor kinase 1 substrate motif;GSK-3, ERK1, ERK2, CDK5 substrate motif;MAPKAPK2 kinase substrate motif;WW domain binding motif
0.108745	-0.0399837	-1.13743	1.39569	NaN	NaN	-0.865636	-1.72674	-1.6609	-0.195829	NaN	-1.75782	NaN	NaN	NaN	0.492817	0.232147	NaN	NaN	NaN	NaN	NaN	NaN	NaN	NaN	-0.361064	NaN	-0.729169	NaN	0.643089	NaN	1.03925	NaN	NaN	NaN	NaN	-0.737912	0.228167	1.09352	0.120924	-0.801096	-0.278446	0.174545	-0.452992	0.100171	0.174055	S	2	___3	Casein kinase II substrate motif;ERK1,2 kinase substrate motif;G protein-coupled receptor kinase 1 substrate motif;GSK-3, ERK1, ERK2, CDK5 substrate motif;MAPKAPK2 kinase substrate motif;WW domain binding motif
NaN	-0.0399837	-1.13743	1.3457	NaN	NaN	-0.865636	-1.72674	-1.6609	-0.195829	NaN	-1.59282	NaN	NaN	NaN	0.492817	0.232147	NaN	NaN	-0.6678	NaN	NaN	NaN	NaN	NaN	-0.361064	NaN	-0.729169	NaN	0.643089	NaN	1.03925	NaN	-2.558	NaN	NaN	-0.737912	0.228167	1.09352	0.120924	-0.801096	-0.514432	0.120924	-0.635356	0.0409167	0.500903	S	3	___3	Casein kinase II substrate motif;ERK1,2 kinase substrate motif;GSK-3, ERK1, ERK2, CDK5 substrate motif;WW domain binding motif
1.84126	0.329656	1.13973	0.746332	0.492497	0.697567	1.05135	0.383157	0.654853	0.568804	1.88364	0.404703	0.0204792	0.514096	1.13108	0.68812	1.39941	0.419984	NaN	-0.193941	0.625242	0.620408	0.535062	NaN	1.45949	0.636459	NaN	0.674807	0.90222	1.52249	0.726097	0.566642	0.667145	0.432761	0.129341	0.484748	2.38706	0.29519	0.798333	1.0647	1.40747	0.630851	0.700452	-0.0696018	0.376605	0.56692	S	3	___2	b-Adrenergic Receptor kinase substrate motif;Casein kinase I substrate motif;Casein kinase II substrate motif;G protein-coupled receptor kinase 1 substrate motif
1.84126	0.329656	1.13973	0.746332	0.492497	0.697567	1.05135	0.383157	0.654853	0.568804	1.88364	0.404703	0.0204792	0.514096	1.13108	0.68812	1.39941	0.419984	NaN	-0.193941	0.625242	0.620408	0.535062	NaN	1.45949	0.636459	NaN	0.674807	0.90222	1.52249	0.726097	0.566642	0.667145	0.432761	0.129341	0.484748	2.38706	0.29519	0.798333	1.0647	1.40747	0.630851	0.700452	-0.0696018	0.376605	0.56692	T	3	___2	b-Adrenergic Receptor kinase substrate motif;Casein kinase II substrate motif;G protein-coupled receptor kinase 1 substrate motif
NaN	-0.871087	-0.996649	-2.53907	NaN	NaN	NaN	-0.52728	NaN	NaN	-0.0555418	NaN	NaN	NaN	NaN	-0.218984	NaN	-1.52111	NaN	-1.4717	NaN	0.646292	NaN	-0.354629	NaN	NaN	NaN	NaN	NaN	NaN	NaN	-0.119462	NaN	0.2399	NaN	0.369152	-0.777861	0.083896	0.365121	NaN	NaN	-0.699184	0.161898	-0.861081	0.0104721	0.0291969	S	3	___1	14-3-3 domain binding motif;Akt kinase substrate motif;Calmodulin-dependent protein kinase II substrate motif;G protein-coupled receptor kinase 1 substrate motif;GSK3 kinase substrate motif;MAPKAPK1 kinase substrate motif;p70 Ribosomal S6 kinase substrate motif;Phosphorylase kinase substrate motif;PKA kinase substrate motif;PKC kinase substrate motif
-0.599233	-0.605962	-0.986293	NaN	-0.464083	NaN	NaN	-1.38265	0.34425	0.19467	0.32214	-0.161537	NaN	-0.00714745	0.663545	NaN	0.40372	-0.442124	NaN	NaN	NaN	0.0441645	-1.37097	NaN	NaN	0.52416	NaN	NaN	NaN	0.379728	0.0983267	-0.727705	NaN	NaN	NaN	NaN	0.430875	NaN	0.399739	NaN	-0.313913	-0.0843422	0.239027	-0.323369	0.170062	0.313051	S	3	___2	14-3-3 domain binding motif;ATM kinase substrate motif;b-Adrenergic Receptor kinase substrate motif;Calmodulin-dependent protein kinase II substrate motif;Calmodulin-dependent protein kinase IV substrate motif;Casein kinase II substrate motif;Chk1 kinase substrate motif;DNA dependent Protein kinase substrate motif;PAK2 kinase substrate motif;PKA kinase substrate motif;PKC epsilon kinase substrate…
-0.599233	NaN	NaN	NaN	NaN	NaN	NaN	NaN	0.34425	NaN	NaN	-0.161537	NaN	-0.00714745	NaN	NaN	0.40372	NaN	NaN	NaN	NaN	0.0441645	-1.37097	NaN	NaN	0.52416	NaN	NaN	NaN	0.379728	0.0983267	-0.727705	NaN	NaN	NaN	NaN	0.430875	NaN	NaN	NaN	-0.313913	0.0185085	0.0983267	-0.0798182	0.36687	0.811448	S	3	___2	Casein kinase I substrate motif;Casein kinase II substrate motif
-0.432302	NaN	NaN	NaN	-0.407034	-0.678028	NaN	NaN	NaN	NaN	-0.265473	-0.434895	-1.12496	NaN	NaN	NaN	0.274389	-0.779385	NaN	-1.63598	-0.60741	0.140889	-0.100951	NaN	NaN	NaN	NaN	NaN	NaN	0.439492	-0.631437	NaN	0.0131588	0.00897604	-0.6298	NaN	NaN	0.123328	NaN	NaN	NaN	-0.433599	0.0110674	-0.444666	0.103908	0.117422	S	3	___3	14-3-3 domain binding motif;ATM kinase substrate motif;b-Adrenergic Receptor kinase substrate motif;Calmodulin-dependent protein kinase II substrate motif;Calmodulin-dependent protein kinase IV substrate motif;Casein kinase II substrate motif;Chk1 kinase substrate motif;DNA dependent Protein kinase substrate motif;PAK2 kinase substrate motif;PKA kinase substrate motif;PKC epsilon kinase substrate…
-0.432302	NaN	NaN	NaN	-0.407034	-0.678028	NaN	NaN	NaN	NaN	-0.265473	-0.434895	-1.12496	NaN	NaN	NaN	0.274389	-0.779385	NaN	-1.63598	-0.60741	0.140889	-0.100951	NaN	NaN	NaN	NaN	NaN	NaN	0.439492	-0.631437	NaN	0.0131588	0.00897604	-0.6298	NaN	NaN	0.123328	NaN	NaN	NaN	-0.433599	0.0110674	-0.444666	0.103908	0.117422	S	3	___3	Casein kinase I substrate motif;Casein kinase II substrate motif
-0.432302	NaN	NaN	NaN	-0.407034	-0.678028	NaN	NaN	NaN	NaN	-0.265473	-0.434895	-1.12496	NaN	NaN	NaN	0.274389	-0.779385	NaN	-1.63598	-0.60741	0.140889	-0.100951	NaN	NaN	NaN	NaN	NaN	NaN	0.439492	-0.631437	NaN	0.0131588	0.00897604	-0.6298	NaN	NaN	0.123328	NaN	NaN	NaN	-0.433599	0.0110674	-0.444666	0.103908	0.117422	S	3	___3	Casein kinase II substrate motif;MDC1 BRCT domain binding motif;Plk1 PBD domain binding motif
0.640446	0.599746	0.664899	0.0313636	-0.988886	0.754918	NaN	0.935722	-0.00633041	1.13336	-0.231426	-0.137973	NaN	-0.609631	0.904876	0.862227	1.40903	-0.448391	-0.477247	0.0464037	0.266542	0.468655	-0.673837	0.0916267	NaN	0.374681	-0.097114	-0.533627	1.98783	1.04223	0.638746	1.1272	0.709006	1.45667	0.0901286	1.44396	0.65161	1.20513	0.996557	1.24616	0.347323	0.266542	0.996557	-0.730015	0.0239252	0.0124616	S	2	___1	14-3-3 domain binding motif;Calmodulin-dependent protein kinase II alpha substrate motif;Calmodulin-dependent protein kinase II substrate motif;Calmodulin-dependent protein kinase IV substrate motif;Casein kinase II substrate motif;Chk1 kinase substrate motif;Phosphorylase kinase substrate motif;PKA kinase substrate motif;PKC epsilon kinase substrate motif;PKC kinase substrate motif
NaN	NaN	NaN	NaN	-0.470612	-0.625507	1.37415	NaN	-0.898496	NaN	NaN	-0.977191	NaN	NaN	NaN	NaN	0.175855	0.0204355	NaN	NaN	NaN	-0.485773	NaN	NaN	NaN	NaN	NaN	NaN	1.02552	0.441488	-0.482378	NaN	0.921041	-1.22571	NaN	NaN	NaN	NaN	NaN	NaN	-1.04822	-0.478193	-0.0204451	-0.457748	0.0980814	0.727837	S	3	___1	ATM kinase substrate motif;Casein kinase I substrate motif;Casein kinase II substrate motif;DNA dependent Protein kinase substrate motif;MDC1 BRCT domain binding motif;Plk1 PBD domain binding motif
1.25929	NaN	NaN	1.57101	2.52271	NaN	2.09725	NaN	0.680252	NaN	2.60693	0.498961	NaN	1.66346	NaN	NaN	NaN	2.16998	NaN	NaN	1.5228	2.16703	NaN	NaN	NaN	NaN	NaN	2.21104	1.76384	NaN	3.78899	1.5977	NaN	NaN	1.14841	2.12039	NaN	1.1126	NaN	NaN	NaN	1.66346	1.76384	-0.100385	0.347535	0.536117	S	2	___1	Casein kinase II substrate motif;G protein-coupled receptor kinase 1 substrate motif;GSK3 kinase substrate motif;PKA kinase substrate motif;PKC kinase substrate motif
NaN	1.25487	1.11361	0.878165	1.52475	0.547099	1.05235	1.11022	NaN	1.17843	2.25202	0.134341	NaN	0.851101	0.904506	0.562111	1.9149	2.08019	1.80912	0.854653	1.43253	1.98062	1.33401	NaN	NaN	1.78421	NaN	1.57149	1.49027	0.659036	0.735875	NaN	0.725394	0.652457	0.686694	2.06386	NaN	0.518262	1.08659	NaN	1.90081	1.17843	0.735875	0.442557	0.112116	0.435843	S	2	___1	14-3-3 domain binding motif;Calmodulin-dependent protein kinase II substrate motif;Casein kinase II substrate motif;Phosphorylase kinase substrate motif;PKA kinase substrate motif;PKC kinase substrate motif
0.884522	0.248882	NaN	1.35565	1.34846	NaN	2.4437	0.375947	-0.0148251	NaN	1.13093	-0.0979046	NaN	1.06893	0.267021	0.917596	1.29138	1.06864	NaN	0.857163	0.267174	1.34527	1.55242	NaN	NaN	1.12335	NaN	NaN	1.2544	0.440357	1.11111	0.0853298	0.67833	0.367343	0.0564722	1.42641	0.322862	0.816803	1.02684	1.03407	0.954224	1.06864	0.816803	0.25184	0.268608	0.347494	S	3	___2	14-3-3 domain binding motif;Calmodulin-dependent protein kinase II substrate motif;Casein kinase II substrate motif;MAPKAPK2 kinase substrate motif;PKA kinase substrate motif;PKC kinase substrate motif
0.884522	0.248882	NaN	1.35565	1.34846	NaN	2.4437	0.375947	-0.0148251	NaN	1.13093	-0.0979046	NaN	1.06893	0.267021	0.917596	0.719356	0.757927	NaN	NaN	0.267174	1.34527	1.09394	NaN	NaN	1.12335	NaN	NaN	1.2544	0.440357	1.11111	0.0853298	0.67833	0.367343	0.0564722	1.42641	NaN	0.816803	1.02684	1.03407	0.954224	0.901059	0.885514	0.0155451	0.460238	0.701496	S	3	___2	ATM kinase substrate motif;Casein kinase I substrate motif;Casein kinase II substrate motif;DNA dependent Protein kinase substrate motif;MDC1 BRCT domain binding motif;Plk1 PBD domain binding motif
0.884522	0.248882	NaN	1.35565	1.34846	NaN	2.4437	0.375947	-0.0148251	NaN	NaN	-0.0979046	NaN	1.06893	0.267021	0.917596	1.00538	0.913269	NaN	0.530977	0.267174	1.34527	1.55242	NaN	NaN	1.12335	NaN	NaN	1.2544	0.440357	NaN	0.0853298	0.67833	0.367343	0.0564722	1.42641	0.322862	NaN	1.02684	1.03407	0.954224	0.915432	0.67833	0.237102	0.28407	0.425313	S	3	___2	BARD1 BRCT domain binding motif;Casein kinase II substrate motif;G protein-coupled receptor kinase 1 substrate motif
1.48216	1.56928	1.49877	2.76667	3.44938	2.62134	4.54229	2.6565	3.08259	1.26146	2.1096	1.05922	NaN	2.45253	2.25448	1.29774	2.28649	2.94594	NaN	1.43292	2.57799	3.27723	2.33565	NaN	NaN	3.73704	NaN	2.21926	1.405	1.48848	3.77127	NaN	1.63954	0.801315	1.59257	2.49565	1.49411	1.10928	NaN	NaN	2.30027	2.39409	1.59257	0.801522	0.00960307	0.0927835	S	3	___3	14-3-3 domain binding motif;Calmodulin-dependent protein kinase II substrate motif;Casein kinase II substrate motif;MAPKAPK2 kinase substrate motif;PKA kinase substrate motif;PKC kinase substrate motif
1.48216	1.56928	1.49877	2.76667	3.44938	2.62134	4.54229	2.6565	3.08259	1.26146	2.1096	1.05922	NaN	2.45253	2.25448	1.29774	2.28649	2.94594	NaN	1.43292	2.57799	3.27723	2.33565	NaN	NaN	3.73704	NaN	2.21926	1.405	1.48848	3.77127	NaN	1.63954	0.801315	1.59257	2.49565	1.49411	1.10928	NaN	NaN	2.30027	2.39409	1.59257	0.801522	0.00960307	0.0927835	S	3	___3	ATM kinase substrate motif;Casein kinase I substrate motif;Casein kinase II substrate motif;DNA dependent Protein kinase substrate motif;MDC1 BRCT domain binding motif;Plk1 PBD domain binding motif
1.48216	1.56928	1.49877	2.76667	3.44938	2.62134	4.54229	2.6565	3.08259	1.26146	2.1096	1.05922	NaN	2.45253	2.25448	1.29774	2.28649	2.94594	NaN	1.43292	2.57799	3.27723	2.33565	NaN	NaN	3.73704	NaN	2.21926	1.405	1.48848	3.77127	NaN	1.63954	0.801315	1.59257	2.49565	1.49411	1.10928	NaN	NaN	2.30027	2.39409	1.59257	0.801522	0.00960307	0.0927835	S	3	___3	BARD1 BRCT domain binding motif;Casein kinase II substrate motif;G protein-coupled receptor kinase 1 substrate motif
-0.922035	-0.647118	NaN	-0.619651	NaN	-0.660886	-0.578864	-1.25627	-0.563294	-1.09721	-0.449631	-0.386435	-0.634817	0.167317	-1.23977	-0.636687	-1.93218	-0.402395	-0.997308	-0.581415	-0.310233	-0.660469	-0.508367	-0.430821	NaN	-1.46401	NaN	-0.705688	-1.24212	-1.3186	-0.291987	-0.972651	-0.90309	-0.449198	-0.146286	NaN	NaN	-0.461181	-1.15918	NaN	-0.817697	-0.634817	-0.817697	0.182881	0.344325	0.798947	S	2	___1	Cdc2 kinase substrate motif;CDK kinase substrate motif;CDK1,2,4,6 kinase substrate motif;ERK1,2 kinase substrate motif;G protein-coupled receptor kinase 1 substrate motif;GSK-3, ERK1, ERK2, CDK5 substrate motif;WW domain binding motif
1.72346	2.06577	2.2379	NaN	0.103465	1.658	0.501906	2.24386	0.695875	1.53674	NaN	1.28418	NaN	1.97254	1.68177	1.80849	1.21978	1.2372	NaN	1.7301	1.84872	NaN	0.555173	2.33038	NaN	2.23358	2.5199	1.53426	0.198632	0.890926	1.45414	1.47118	1.91012	1.16709	0.927713	-0.597098	1.41819	1.15219	1.39	0.819676	1.11503	1.70261	1.16709	0.53552	0.0659058	0.11945	S	3	___1	14-3-3 domain binding motif;Aurora-A kinase substrate motif;Calmodulin-dependent protein kinase II substrate motif;Casein kinase II substrate motif;PAK2 kinase substrate motif;Phosphorylase kinase substrate motif;PKA kinase substrate motif;PKC epsilon kinase substrate motif;PKC kinase substrate motif
NaN	1.30034	0.702743	-0.055975	0.462441	NaN	NaN	0.664974	NaN	0.601792	NaN	0.407334	0.784464	0.271883	1.03396	0.836035	0.615409	1.00816	NaN	0.842056	NaN	0.0313885	NaN	NaN	NaN	0.360834	NaN	0.960035	NaN	NaN	NaN	1.10379	0.956004	0.447148	0.778836	0.594282	0.382848	0.385168	0.554421	0.749527	NaN	0.640191	0.671905	-0.0317134	0.413353	0.547853	S	4	___1	14-3-3 domain binding motif;Calmodulin-dependent protein kinase II substrate motif;Casein kinase II substrate motif;G protein-coupled receptor kinase 1 substrate motif;PAK2 kinase substrate motif;PKA kinase substrate motif;PKC epsilon kinase substrate motif;PKC kinase substrate motif
1.00352	NaN	NaN	0.587712	-0.101019	0.522969	0.515618	0.706562	0.254533	0.729513	0.932569	0.447035	NaN	-0.0278837	0.888334	1.2208	0.552084	0.86901	NaN	0.766138	0.921605	1.34012	0.823369	NaN	NaN	NaN	NaN	1.20332	1.08674	0.778727	0.0935422	NaN	0.485687	0.062607	0.957594	1.29288	0.586	0.518109	0.61489	NaN	0.981347	0.729513	0.696809	0.0327039	0.477435	0.783263	S	4	___1	14-3-3 domain binding motif;b-Adrenergic Receptor kinase substrate motif;Calmodulin-dependent protein kinase II substrate motif;Casein kinase II substrate motif;PKA kinase substrate motif;PKC kinase substrate motif;ZIP kinase substrate motif
0.332761	0.52864	0.866588	NaN	2.33801	0.148934	1.36646	NaN	NaN	NaN	NaN	0.074082	1.37177	NaN	NaN	-0.0737925	-0.501877	0.151618	NaN	1.03549	-0.435995	0.458253	-0.382971	1.2284	NaN	NaN	NaN	0.43593	NaN	NaN	-0.583316	NaN	-0.839309	1.2306	0.358342	NaN	NaN	0.774789	1.47807	NaN	-0.000192769	0.395507	0.397136	-0.00162902	0.4431	0.624121	S	2	___1	MDC1 BRCT domain binding motif;PKA kinase substrate motif;PKC kinase substrate motif;Plk1 PBD domain binding motif
1.61204	2.18833	1.98082	NaN	0.934939	NaN	NaN	NaN	NaN	NaN	2.46812	NaN	NaN	NaN	1.71589	2.11607	NaN	2.21343	NaN	-1.13143	3.31307	NaN	NaN	NaN	NaN	1.61587	NaN	2.05649	2.40669	NaN	NaN	NaN	NaN	1.12011	1.83571	NaN	NaN	-1.6812	1.5541	NaN	NaN	1.98082	1.69491	0.285917	0.234552	0.479254	S	2	___1	14-3-3 domain binding motif;Akt kinase substrate motif;Calmodulin-dependent protein kinase II substrate motif;Casein kinase II substrate motif;MAPKAPK1 kinase substrate motif;p70 Ribosomal S6 kinase substrate motif;Phosphorylase kinase substrate motif;PKA kinase substrate motif;PKC kinase substrate motif;ZIP kinase substrate motif
-0.602808	-0.248938	NaN	-0.427592	-0.0947773	-0.395354	0.334648	-0.586144	-0.399223	-0.41167	-0.82914	-0.63212	NaN	-0.046203	-0.463833	-0.425912	-0.645517	-0.457075	NaN	-0.383722	-0.588368	NaN	-0.658869	NaN	NaN	-0.469887	NaN	0.0103221	-0.23249	-0.303392	-0.205505	NaN	-0.306015	-0.214529	-0.499033	-0.440406	-0.712756	-0.671511	-0.693697	NaN	-0.342847	-0.442333	-0.324431	-0.117902	0.331371	0.670969	S	3	___2	Casein kinase II substrate motif;Pyruvate dehydrogenase kinase substrate motif
-0.602808	-0.248938	NaN	-0.427592	-0.0947773	-0.395354	0.334648	-0.586144	-0.399223	-0.41167	-0.82914	-0.63212	NaN	-0.046203	-0.463833	-0.425912	-0.645517	-0.457075	NaN	-0.383722	-0.588368	NaN	-0.658869	NaN	NaN	-0.469887	NaN	0.0103221	-0.23249	-0.303392	-0.205505	NaN	-0.306015	-0.214529	-0.499033	-0.440406	-0.712756	-0.671511	-0.693697	NaN	-0.342847	-0.442333	-0.324431	-0.117902	0.331371	0.670969	S	3	___2	BARD1 BRCT domain binding motif;Casein kinase II substrate motif;G protein-coupled receptor kinase 1 substrate motif;MDC1 BRCT domain binding motif;Plk1 PBD domain binding motif
-1.16615	-1.14674	-0.350193	-1.02601	-0.783974	-0.89531	-0.647357	-1.45301	-0.668206	-1.02005	-1.28246	-0.244402	NaN	-0.329652	-1.69074	-0.511396	-1.67834	-1.0782	NaN	-0.410171	-0.7446	-1.06872	-0.840076	NaN	NaN	-3.13159	NaN	-0.00869682	-1.17502	-1.09081	-0.907638	NaN	-1.60043	-0.200368	-0.7207	-0.840237	-1.55737	-0.93083	-1.58708	-2.29802	-1.35314	-0.957681	-1.09081	0.133129	0.403382	0.679627	S	2	___2	Casein kinase II substrate motif;MAPKAPK2 kinase substrate motif;PKA kinase substrate motif;PKC kinase substrate motif;Pyruvate dehydrogenase kinase substrate motif
-1.16615	-1.14674	-0.350193	-1.02601	-0.783974	-0.89531	-0.647357	-1.45301	-0.668206	-1.02005	-1.28246	-0.244402	NaN	-0.329652	-1.69074	-0.511396	-1.67834	-1.0782	NaN	-0.410171	-0.7446	-1.06872	-0.840076	NaN	NaN	-3.13159	NaN	-0.00869682	-1.17502	-1.09081	-0.907638	NaN	-1.60043	-0.200368	-0.7207	-0.840237	-1.55737	-0.93083	-1.58708	-2.29802	-1.35314	-0.957681	-1.09081	0.133129	0.403382	0.679627	S	2	___2	b-Adrenergic Receptor kinase substrate motif;BARD1 BRCT domain binding motif;Casein kinase II substrate motif
2.24955	2.71812	2.10102	2.08179	NaN	NaN	NaN	1.77031	2.53427	2.36272	2.0034	2.32241	NaN	NaN	3.20532	NaN	0.894108	NaN	NaN	1.8663	NaN	NaN	2.24007	NaN	NaN	1.93605	NaN	NaN	NaN	1.94633	NaN	1.78736	1.04174	1.449	2.60761	2.8536	1.91219	1.16082	NaN	2.01156	2.33496	2.17055	1.92926	0.24129	0.279633	0.291478	T	3	___2	Calmodulin-dependent protein kinase II substrate motif;GSK-3, ERK1, ERK2, CDK5 substrate motif;MDC1 BRCT domain binding motif;PKC kinase substrate motif;Plk1 PBD domain binding motif;WW domain binding motif
-0.0934207	0.405373	0.107382	0.242166	0.507157	-0.0500547	0.566156	0.19063	0.240142	-0.433449	NaN	NaN	-1.39692	-1.04892	NaN	NaN	-0.593525	0.194869	0.805103	NaN	0.0908524	0.433705	0.00488143	NaN	NaN	-0.37176	NaN	0.0751676	-0.505235	NaN	0.752844	-0.337162	-0.177259	NaN	0.0212005	-0.0638749	-0.529495	NaN	-0.510324	-0.224823	NaN	0.107382	-0.201041	0.308423	0.21344	0.436816	S	3	___1	14-3-3 domain binding motif;Calmodulin-dependent protein kinase II substrate motif;Calmodulin-dependent protein kinase IV substrate motif;Chk1 kinase substrate motif;ERK1,2 kinase substrate motif;Growth associated histone HI kinase substrate motif;GSK-3, ERK1, ERK2, CDK5 substrate motif;PKA kinase substrate motif;PKC kinase substrate motif;WW domain binding motif
NaN	-0.528832	0.033207	NaN	-1.71099	NaN	-0.622814	0.139244	-0.546855	0.402829	NaN	-0.934867	NaN	-0.688664	0.348617	-0.0107478	-0.374715	-0.91025	NaN	0.147457	-0.743794	-0.946132	-1.10494	NaN	NaN	0.305026	NaN	-0.544298	-0.533965	NaN	NaN	NaN	0.307995	0.201318	-1.00687	-0.744085	0.284808	0.645207	0.520898	-0.0784188	0.057259	-0.537843	0.057259	-0.595102	0.0506374	0.119612	S	3	___1	14-3-3 domain binding motif;b-Adrenergic Receptor kinase substrate motif;Calmodulin-dependent protein kinase II substrate motif;Calmodulin-dependent protein kinase IV substrate motif;Casein kinase II substrate motif;Chk1 kinase substrate motif;PAK2 kinase substrate motif;PKA kinase substrate motif;PKC epsilon kinase substrate motif;PKC kinase substrate motif;Pyruvate dehydrogenase kinase substrat…
-1.54238	-1.13803	-0.516643	NaN	-0.698341	NaN	NaN	0.0791628	0.334109	-0.688024	-0.105839	-1.0504	NaN	-0.405699	-0.668384	-0.812849	0.397232	NaN	NaN	NaN	-0.609281	NaN	-0.104385	-1.61587	NaN	0.0549694	NaN	-0.401462	NaN	-0.618021	NaN	NaN	-0.216311	-1.34057	-1.12025	-1.68909	-0.757578	-0.43209	-0.166479	NaN	0.219546	-0.609281	-0.525056	-0.0842257	0.362696	0.622519	S	2	___1	Casein kinase II substrate motif;ERK1,2 kinase substrate motif;G protein-coupled receptor kinase 1 substrate motif;GSK-3, ERK1, ERK2, CDK5 substrate motif;PKA kinase substrate motif;PKC kinase substrate motif;WW domain binding motif
0.10108	0.349604	0.662815	0.19851	0.652127	0.193056	0.360481	0.143952	0.176299	0.153133	0.038436	0.627038	1.4263	0.393477	0.030896	-0.168477	0.0259889	0.344636	0.353319	0.160159	0.389189	0.504879	0.3342	0.477828	NaN	0.277942	NaN	1.02215	0.158856	0.103557	0.85704	0.330125	0.248403	-0.0790933	0.244105	0.419572	-0.0357569	-0.22878	0.23142	0.0290212	0.122943	0.3342	0.195138	0.139061	0.396192	0.454366	S	3	___2	Casein kinase II substrate motif;ERK1,2 kinase substrate motif;G protein-coupled receptor kinase 1 substrate motif;GSK-3, ERK1, ERK2, CDK5 substrate motif;WW domain binding motif
0.10108	0.349604	0.662815	0.19851	0.652127	-0.0199047	0.360481	0.143952	0.176299	0.153133	0.038436	0.627038	1.4263	0.393477	0.030896	-0.168477	0.0259889	0.344636	0.353319	0.160159	0.389189	0.504879	0.3342	0.477828	NaN	0.277942	NaN	1.02215	0.158856	0.103557	0.85704	0.330125	0.14243	-0.0790933	0.244105	0.419572	-0.0357569	-0.22878	0.23142	0.0290212	0.122943	0.3342	0.150643	0.183557	0.343545	0.463334	S	3	___2	ERK1,2 kinase substrate motif;G protein-coupled receptor kinase 1 substrate motif;GSK3 kinase substrate motif;GSK-3, ERK1, ERK2, CDK5 substrate motif;WW domain binding motif
0.783572	1.18604	NaN	0.55826	0.915948	1.08906	0.674325	0.468654	1.1046	0.496412	0.915525	0.851426	NaN	0.719596	0.625585	0.957578	-0.166835	NaN	1.4681	0.765064	1.26811	0.653104	0.515682	1.26814	NaN	0.43873	NaN	1.29181	NaN	0.245035	0.875217	0.318735	0.0997779	0.687473	1.31754	NaN	0.440639	0.409052	0.374474	NaN	0.576414	0.774318	0.440639	0.333679	0.19112	0.194552	S	4	___1	14-3-3 domain binding motif;b-Adrenergic Receptor kinase substrate motif;Calmodulin-dependent protein kinase II substrate motif;Calmodulin-dependent protein kinase IV substrate motif;Chk1 kinase substrate motif;CLK1 kinase substrate motif;G protein-coupled receptor kinase 1 substrate motif;PAK2 kinase substrate motif;PKA kinase substrate motif;PKC epsilon kinase substrate motif;PKC kinase substra…
-0.0669573	0.351211	0.040406	-0.0129108	0.275149	0.56332	0.261769	-0.220544	0.496995	-0.408221	0.340724	0.269381	NaN	0.864026	-0.0542995	0.0788913	NaN	0.208165	0.123019	0.12408	0.439173	NaN	NaN	0.402399	NaN	-0.0241145	NaN	0.488598	-0.244901	-0.333701	0.520261	-0.368488	-0.439483	-0.030497	0.72187	0.564985	-0.457768	-0.303676	-0.353175	-0.28867	-0.0398073	0.208165	-0.266785	0.47495	0.0939235	0.0861579	S	2	___1	14-3-3 domain binding motif;b-Adrenergic Receptor kinase substrate motif;Calmodulin-dependent protein kinase II substrate motif;ERK1,2 kinase substrate motif;GSK-3, ERK1, ERK2, CDK5 substrate motif;MAPKAPK2 kinase substrate motif;PKA kinase substrate motif;PKC kinase substrate motif;WW domain binding motif
0.168575	1.10234	0.490522	1.13825	0.662447	0.541153	-0.275951	0.60621	-0.505037	0.353193	0.172661	-0.0218822	1.19114	1.01706	0.180664	1.07034	0.781508	1.31079	0.986185	0.560549	1.02083	0.0444743	0.480681	1.35298	NaN	0.688382	0.547984	0.573635	0.618074	0.0713727	0.0188772	0.245765	0.178817	0.452487	0.437961	1.38722	0.169466	0.0873123	0.360226	0.553768	0.885918	0.60621	0.437961	0.168249	0.361376	0.233074	S	2	___1	ERK1,2 kinase substrate motif;GSK-3, ERK1, ERK2, CDK5 substrate motif;PKA kinase substrate motif;PKC kinase substrate motif;WW domain binding motif
0.00629761	0.521603	0.268844	0.73418	1.17308	0.273922	0.680181	0.197389	0.270678	-0.696326	0.706685	0.659893	0.485227	0.883506	0.309266	0.324462	-0.846281	0.618516	0.675247	0.0991467	0.615437	0.550649	0.710092	NaN	NaN	-0.23968	NaN	0.494727	-0.0436198	-0.309506	0.537381	NaN	0.336072	0.288678	-0.868533	0.395568	0.0354672	-0.122966	-0.118314	-0.195863	0.353038	0.503415	0.0354672	0.467948	0.0976587	0.0392817	S	3	___1	14-3-3 domain binding motif;Akt kinase substrate motif;b-Adrenergic Receptor kinase substrate motif;Calmodulin-dependent protein kinase II substrate motif;MAPKAPK1 kinase substrate motif;PKA kinase substrate motif;PKC epsilon kinase substrate motif;PKC kinase substrate motif
NaN	-0.581331	NaN	NaN	NaN	NaN	NaN	NaN	0.883543	NaN	NaN	1.13691	NaN	-0.148977	NaN	0.832513	-0.561463	NaN	NaN	0.553823	NaN	-0.181963	NaN	0.592788	NaN	NaN	NaN	0.282091	NaN	NaN	NaN	NaN	0.122562	0.426546	-0.0711797	NaN	-0.833884	0.422113	-0.286609	NaN	NaN	0.553823	0.122562	0.43126	0.119018	0.344032	S	3	___1	DNA dependent Protein kinase substrate motif;MAPKAPK2 kinase substrate motif;Phosphorylase kinase substrate motif;PKA kinase substrate motif;PKC kinase substrate motif
-0.212593	0.231304	0.185496	NaN	0.258556	-0.15668	NaN	0.230234	0.37449	NaN	-0.068039	NaN	-0.161629	0.424969	-0.320656	0.0716737	-0.942029	0.170961	-0.294046	0.144809	0.516724	NaN	NaN	NaN	NaN	0.420259	NaN	0.310691	NaN	-0.481814	0.0875992	NaN	-0.755567	NaN	0.420901	-0.0208912	-0.595943	-0.291375	-0.639858	-0.20962	0.193398	0.157885	-0.20962	0.367504	0.163569	0.140594	T	2	___1	G protein-coupled receptor kinase 1 substrate motif;GSK-3, ERK1, ERK2, CDK5 substrate motif;PKA kinase substrate motif;PKC kinase substrate motif;WW domain binding motif
-0.427662	0.0243279	NaN	NaN	-0.481581	-0.196078	0.240295	NaN	NaN	NaN	-0.109119	-0.248242	-0.266598	NaN	-1.18947	0.437812	-0.399339	0.0340765	-0.405292	-0.378417	-0.0732407	-0.361753	NaN	NaN	NaN	NaN	0.121628	-0.428998	0.3253	-0.258893	-0.785292	NaN	0.109504	NaN	0.165122	NaN	NaN	-0.527805	0.406566	-0.126989	-0.159525	-0.25742	-0.126989	-0.13043	0.319999	0.370253	S	3	___2	DNA dependent Protein kinase substrate motif;ERK1,2 kinase substrate motif;G protein-coupled receptor kinase 1 substrate motif;GSK3 kinase substrate motif;GSK-3, ERK1, ERK2, CDK5 substrate motif;WW domain binding motif
0.838195	1.09201	NaN	1.18778	NaN	1.55464	NaN	1.10902	1.42675	0.88176	1.06076	0.663261	1.9697	1.79676	1.28252	1.19951	0.379333	1.75236	NaN	1.32049	1.1017	0.980638	0.289626	2.03369	NaN	0.859632	NaN	1.89101	1.0618	0.616861	1.04952	0.418101	0.756324	NaN	0.189678	NaN	1.05678	NaN	1.00841	NaN	1.30228	1.10902	1.02897	0.0800529	0.468877	0.196334	S	3	___2	AMP-activated protein kinase substrate motif;Casein kinase II substrate motif;ERK1,2 kinase substrate motif;GSK-3, ERK1, ERK2, CDK5 substrate motif;PKA kinase substrate motif;WW domain binding motif
0.838195	1.09201	NaN	1.18778	NaN	1.55464	NaN	1.10902	1.42675	0.88176	1.06076	0.663261	NaN	1.79676	1.28252	1.19951	0.379333	1.75236	NaN	NaN	0.544128	0.980638	0.289626	NaN	NaN	NaN	NaN	1.89101	NaN	0.616861	1.04952	NaN	0.756324	NaN	0.189678	1.21249	1.06122	NaN	1.00841	NaN	1.2366	1.09201	1.04952	0.042493	0.487267	0.76049	S	3	___2	Casein kinase II substrate motif;ERK1,2 kinase substrate motif;GSK-3, ERK1, ERK2, CDK5 substrate motif;WW domain binding motif
-0.427662	0.0243279	NaN	NaN	-0.481581	-0.196078	0.240295	NaN	NaN	NaN	-0.109119	-0.248242	-0.266598	NaN	-1.18947	0.437812	-0.399339	0.0340765	-0.405292	-0.378417	-0.0732407	-0.361753	NaN	NaN	NaN	NaN	0.121628	-0.428998	0.3253	-0.258893	-0.785292	NaN	0.109504	NaN	0.165122	NaN	NaN	-0.527805	0.406566	-0.126989	-0.159525	-0.25742	-0.126989	-0.13043	0.319999	0.370253	T	2	___2	G protein-coupled receptor kinase 1 substrate motif;GSK-3, ERK1, ERK2, CDK5 substrate motif;PKA kinase substrate motif;PKC kinase substrate motif;WW domain binding motif
NaN	0.738498	NaN	0.323882	0.929138	NaN	0.934801	NaN	1.15551	0.538017	0.63197	0.474097	NaN	0.60874	0.505016	NaN	0.173147	0.510654	NaN	NaN	0.200573	0.974631	NaN	-0.297127	NaN	NaN	NaN	NaN	NaN	NaN	0.573516	0.48474	-0.455573	NaN	0.596789	NaN	0.525977	0.374297	0.27467	NaN	NaN	0.538017	0.48474	0.0532762	0.498105	0.215896	S	5	___1	Casein kinase I substrate motif;Casein kinase II substrate motif
NaN	NaN	0.332483	0.359571	NaN	NaN	NaN	-0.814538	0.673534	-0.0674329	0.275388	1.02358	NaN	0.846496	0.241868	-0.30185	-0.161685	NaN	NaN	-4.29879	0.773614	0.578973	NaN	NaN	NaN	-0.134676	NaN	NaN	NaN	NaN	1.251	-0.563323	-0.142338	-2.73893	0.359032	NaN	NaN	NaN	0.0873274	NaN	0.112284	0.275388	0.0873274	0.188061	0.338362	0.74701	T	3	___1	b-Adrenergic Receptor kinase substrate motif;Casein kinase II substrate motif;G protein-coupled receptor kinase 1 substrate motif
-0.0882478	0.108813	0.136562	2.1163	-0.235604	0.573095	NaN	1.19494	0.703324	0.415759	0.0937977	0.997682	NaN	0.683795	NaN	0.0157049	0.463582	-0.36524	0.13598	1.30126	1.07282	0.524351	-0.177007	NaN	NaN	0.519914	NaN	-0.0263986	0.119056	0.0397854	1.10246	0.77544	0.373524	0.201267	0.0376289	1.23496	NaN	0.36729	0.326629	-0.331156	0.682989	0.463582	0.326629	0.136954	0.398742	0.558928	S	3	___1	Cdc2 kinase substrate motif;CDK kinase substrate motif;CDK1,2,4,6 kinase substrate motif;ERK1,2 kinase substrate motif;GSK-3, ERK1, ERK2, CDK5 substrate motif;WW domain binding motif
-1.83278	-3.52717	NaN	NaN	NaN	-2.62616	-2.63093	-5.11888	-1.12874	NaN	-1.60825	NaN	NaN	-1.08585	NaN	-2.2728	-2.00948	NaN	-2.37363	NaN	NaN	-1.17184	NaN	-2.55922	NaN	NaN	NaN	NaN	-1.45498	-2.37987	NaN	NaN	-2.15703	-0.881272	-2.25737	-1.17275	NaN	-1.31104	NaN	NaN	NaN	-2.2728	-1.45498	-0.81782	0.0139046	0.107393	S	3	___1	MAPKAPK2 kinase substrate motif
0.356171	NaN	NaN	0.101167	1.11589	NaN	NaN	0.873027	NaN	NaN	0.160423	0.995004	NaN	1.1655	NaN	NaN	-0.076022	0.350297	NaN	0.727871	0.588408	0.122101	NaN	NaN	NaN	NaN	NaN	0.43714	NaN	0.154758	1.02866	NaN	0.157571	0.264034	0.513687	0.592845	NaN	-0.361624	NaN	NaN	0.347304	0.472289	0.347304	0.124985	0.413303	0.292624	S	4	___2	Casein kinase II substrate motif
0.356171	NaN	NaN	0.101167	1.11589	NaN	NaN	0.873027	NaN	NaN	0.160423	0.995004	NaN	1.1655	NaN	NaN	-0.076022	0.350297	NaN	0.727871	0.588408	0.122101	NaN	NaN	NaN	NaN	NaN	0.43714	NaN	0.154758	1.02866	NaN	0.157571	0.264034	0.513687	0.592845	NaN	-0.361624	NaN	NaN	0.347304	0.472289	0.347304	0.124985	0.413303	0.292624	S	4	___2	Casein kinase II substrate motif;G protein-coupled receptor kinase 1 substrate motif
-1.65443	NaN	NaN	-1.29601	-0.32497	-1.46125	NaN	-1.56756	-0.126147	-0.771391	-1.13328	-0.340534	-0.293012	-0.409206	-0.933237	-0.908349	-0.748671	-1.18002	NaN	-0.577217	-0.570613	NaN	-0.678041	NaN	-0.392775	-0.971294	NaN	-0.0833964	-0.47007	-1.09327	-0.441038	-1.12809	-0.49741	-0.994968	-0.960539	NaN	-1.29759	NaN	NaN	NaN	-1.13625	-0.760031	-0.977753	0.217723	0.305028	0.96786	S	2	___2	Casein kinase II substrate motif;ERK1,2 kinase substrate motif;Growth associated histone HI kinase substrate motif;GSK-3, ERK1, ERK2, CDK5 substrate motif;PKA kinase substrate motif;PKC kinase substrate motif;WW domain binding motif
-1.65443	NaN	NaN	-1.29601	-0.32497	-1.46125	NaN	-1.56756	-0.126147	-0.771391	-1.13328	-0.340534	-0.293012	-0.409206	-0.933237	-0.908349	-0.748671	-1.18002	NaN	-0.577217	-0.570613	NaN	-0.678041	NaN	-0.392775	-0.971294	NaN	-0.0833964	-0.47007	-1.09327	-0.441038	-1.12809	-0.49741	-0.994968	-0.960539	NaN	-1.29759	NaN	NaN	NaN	-1.13625	-0.760031	-0.977753	0.217723	0.305028	0.96786	S	2	___2	14-3-3 domain binding motif;Calmodulin-dependent protein kinase II substrate motif;Casein kinase II substrate motif;DNA dependent Protein kinase substrate motif;ERK1,2 kinase substrate motif;GSK-3, ERK1, ERK2, CDK5 substrate motif;PKA kinase substrate motif;PKC kinase substrate motif;WW domain binding motif;ZIP kinase substrate motif
-4.11048	-4.61316	-2.90305	-4.14399	-1.72631	-2.88363	-1.86826	-3.4704	NaN	-1.55609	-0.915373	NaN	-2.4966	2.17594	-3.09004	-2.49684	-2.40754	-2.58071	-1.30112	-2.78133	-1.58928	2.0321	-2.31254	NaN	NaN	-4.1561	NaN	-0.82628	-1.44732	0.0569095	-0.997521	NaN	-2.08694	-2.05971	NaN	-1.96668	-2.13106	-1.8232	-0.839066	-1.24212	-2.2151	-2.49672	-1.63526	-0.861459	0.0104457	0.0753236	S	3	___1	Casein kinase I substrate motif
NaN	NaN	NaN	NaN	NaN	-4.26562	NaN	NaN	NaN	-2.18089	-0.701657	NaN	NaN	NaN	NaN	-4.51971	-2.02397	NaN	-2.60053	NaN	-2.42378	-1.07515	NaN	-4.06584	NaN	-2.46794	NaN	-2.93294e-05	-2.53194	-1.10432	NaN	NaN	-0.3084	-2.21165	NaN	-2.76706	NaN	-1.09162	NaN	NaN	-1.9228	-2.44586	-1.51356	-0.9323	0.0064148	0.0533438	S	4	___1
-4.78382	-4.6498	NaN	-2.91722	-1.10125	-4.2131	-3.13319	-5.12888	NaN	-2.18089	NaN	-4.13842	NaN	-3.67704	-2.24774	-4.45305	-2.04824	-4.62644	-2.60053	-3.00498	-3.52472	NaN	-2.21361	-3.32706	NaN	NaN	NaN	NaN	-3.23708	NaN	-3.09064	NaN	-0.284396	-2.20357	-4.67552	-2.86629	-1.31142	NaN	NaN	NaN	NaN	-3.32706	-2.86629	-0.46078	0.0967657	0.191915	S	5	___1	MDC1 BRCT domain binding motif;PKA kinase substrate motif;PKC kinase substrate motif;Plk1 PBD domain binding motif
0.0176652	-0.275855	-0.482467	-0.00918815	0.0142965	-0.458564	-0.115535	-0.509277	0.23116	-0.456236	0.0496817	-0.131383	0.304476	0.470509	-0.351924	-0.499299	-0.369397	0.0441664	-0.600041	-1.02042	-0.155199	-0.190256	-0.146531	-0.064269	NaN	-0.473013	-0.0656099	-0.0729554	-0.151362	-0.323841	-0.152339	-0.529878	-0.479566	-0.32211	0.00831342	-0.0812714	-0.0720467	-0.0994904	-0.490984	-0.3469	-0.230658	-0.155199	-0.152339	-0.00285947	0.441876	0.799592	S	3	___1	14-3-3 domain binding motif;Akt kinase substrate motif;b-Adrenergic Receptor kinase substrate motif;Calmodulin-dependent protein kinase II substrate motif;ERK1,2 kinase substrate motif;G protein-coupled receptor kinase 1 substrate motif;GSK-3, ERK1, ERK2, CDK5 substrate motif;MAPKAPK1 kinase substrate motif;PKA kinase substrate motif;PKC kinase substrate motif;WW domain binding motif
NaN	-1.77104	NaN	-0.668825	-0.469105	NaN	NaN	NaN	-1.18825	NaN	-1.34611	-1.81343	NaN	-0.435127	-1.77172	-1.82223	NaN	NaN	NaN	-2.68213	-0.799704	-0.579182	NaN	-2.5959	NaN	NaN	NaN	NaN	-1.15259	NaN	-1.03158	NaN	-2.25115	-2.08768	NaN	NaN	NaN	-1.5691	NaN	-2.22613	NaN	-1.34611	-1.82839	0.482282	0.0901265	0.290537	S	2	___1	Cdc2 kinase substrate motif;CDK kinase substrate motif;CDK1,2,4,6 kinase substrate motif;DNA dependent Protein kinase substrate motif;ERK1,2 kinase substrate motif;GSK-3, ERK1, ERK2, CDK5 substrate motif;WW domain binding motif
NaN	NaN	-1.20587	-0.658907	-0.128143	-0.382729	-0.113706	NaN	0.21652	-1.00987	0.126811	-0.294913	NaN	0.451133	NaN	-1.14635	-0.890292	-0.71019	-1.17268	-1.4107	-0.31788	-0.222451	NaN	NaN	NaN	-0.649309	-0.188311	-0.750609	NaN	NaN	-0.34575	-0.744825	-0.267713	-0.324654	-0.327269	-0.197247	-1.31745	-0.695137	-1.08023	-0.71917	-1.17182	-0.516019	-0.695137	0.179118	0.348681	0.565968	S	3	___1	ERK1,2 kinase substrate motif;GSK-3, ERK1, ERK2, CDK5 substrate motif;MAPKAPK2 kinase substrate motif;PKA kinase substrate motif;PKC kinase substrate motif;WW domain binding motif
NaN	NaN	-0.126706	0.404	NaN	NaN	NaN	-1.68622	0.577852	NaN	-0.317274	-2.54486	NaN	0.813851	NaN	-0.811646	NaN	-0.751811	NaN	0.0348264	NaN	NaN	NaN	NaN	NaN	NaN	NaN	-0.530769	NaN	NaN	-0.653921	NaN	-0.123112	0.0741014	NaN	NaN	-0.868979	0.330514	-0.36358	NaN	-0.642072	-0.22199	-0.447175	0.225185	0.296877	0.800105	T	2	___1	Akt kinase substrate motif;b-Adrenergic Receptor kinase substrate motif;Calmodulin-dependent protein kinase II substrate motif;G protein-coupled receptor kinase 1 substrate motif;GSK-3, ERK1, ERK2, CDK5 substrate motif;PKC kinase substrate motif;WW domain binding motif
-0.585779	-0.638012	-0.773223	-0.563564	0.025025	-0.487299	-0.283957	-0.961021	-0.14421	-0.731838	0.0143787	-0.376279	-0.129621	-0.0119242	-0.538019	-0.568267	-0.683535	-0.255558	-0.704372	-1.0495	-0.0636714	-0.205932	-0.270441	-0.742204	-0.113217	-0.930475	-0.617419	-0.382473	-0.615921	-0.631616	-0.263048	-1.10904	-0.451492	-0.33306	-0.701197	-0.111592	-0.418561	-0.701545	-0.807074	-0.511808	-0.317951	-0.512659	-0.511808	-0.000850275	0.443875	0.387274	S	2	___2	14-3-3 domain binding motif;Akt kinase substrate motif;b-Adrenergic Receptor kinase substrate motif;Calmodulin-dependent protein kinase II substrate motif;ERK1,2 kinase substrate motif;G protein-coupled receptor kinase 1 substrate motif;GSK3 kinase substrate motif;GSK-3, ERK1, ERK2, CDK5 substrate motif;MAPKAPK1 kinase substrate motif;PKA kinase substrate motif;PKC kinase substrate motif;WW domai…
-0.585779	-0.638012	-0.773223	-0.563564	0.025025	-0.487299	-0.283957	-0.961021	-0.14421	-0.731838	0.0143787	-0.376279	-0.129621	-0.0119242	-0.538019	-0.568267	-0.683535	-0.255558	-0.704372	-1.0495	-0.0636714	-0.205932	-0.270441	-0.742204	-0.113217	-0.930475	-0.617419	-0.382473	-0.615921	-0.631616	-0.263048	-1.10904	-0.451492	-0.33306	-0.701197	-0.111592	-0.418561	-0.701545	-0.807074	-0.511808	-0.317951	-0.512659	-0.511808	-0.000850275	0.443875	0.387274	S	2	___2	Cdc2 kinase substrate motif;CDK kinase substrate motif;CDK1,2,4,6 kinase substrate motif;DNA dependent Protein kinase substrate motif;ERK1,2 kinase substrate motif;GSK-3, ERK1, ERK2, CDK5 substrate motif;MAPKAPK2 kinase substrate motif;WW domain binding motif
-0.359841	-0.385741	-0.90084	-0.381375	0.0185795	-0.348398	-0.192009	-0.597867	-0.211301	-0.785246	0.195341	-0.193394	0.21354	0.570246	-0.433255	-0.389309	-0.540999	-0.0147038	-0.658644	-0.918191	0.0477052	-0.0903413	-0.0859948	-0.440457	-0.206503	-0.837249	-0.230936	-0.303957	-0.462396	-0.458301	-0.00231218	-0.618081	-0.902086	-0.240627	0.0983616	-0.115608	-0.0168694	-0.981047	-0.28002	-0.57896	-0.521177	-0.354119	-0.303957	-0.0501628	0.395342	0.525888	S	2	___2	Cdc2 kinase substrate motif;CDK kinase substrate motif;CDK1,2,4,6 kinase substrate motif;DNA dependent Protein kinase substrate motif;ERK1,2 kinase substrate motif;GSK-3, ERK1, ERK2, CDK5 substrate motif;WW domain binding motif
-0.292986	-0.587925	-0.866248	-1.21238	NaN	-0.648542	NaN	NaN	-0.271337	-0.276968	-0.0623166	0.383207	NaN	-0.565896	-0.320951	-0.477628	-0.395946	-0.401806	NaN	-1.34235	-0.430211	-0.302302	-0.220014	NaN	NaN	-0.811399	-0.459311	-0.564411	NaN	-0.559249	-0.484742	-0.13156	0.42867	-1.11769	-0.440318	-0.276817	-0.420444	NaN	NaN	NaN	-0.448909	-0.401806	-0.448909	0.0471036	0.4919	0.617564	S	3	___2	14-3-3 domain binding motif;Akt kinase substrate motif;b-Adrenergic Receptor kinase substrate motif;Calmodulin-dependent protein kinase II substrate motif;ERK1,2 kinase substrate motif;G protein-coupled receptor kinase 1 substrate motif;GSK3 kinase substrate motif;GSK-3, ERK1, ERK2, CDK5 substrate motif;MAPKAPK1 kinase substrate motif;PKA kinase substrate motif;PKC kinase substrate motif;WW domai…
-0.292986	-0.587925	-0.866248	-1.21238	NaN	-0.648542	NaN	NaN	-0.271337	-0.276968	-0.0623166	0.383207	NaN	-0.565896	-0.320951	-0.477628	-0.395946	-0.401806	NaN	-1.34235	-0.430211	-0.302302	-0.220014	NaN	NaN	-0.811399	-0.459311	-0.564411	NaN	-0.559249	-0.484742	-0.13156	0.42867	-1.11769	-0.440318	-0.276817	-0.420444	NaN	NaN	NaN	-0.448909	-0.401806	-0.448909	0.0471036	0.4919	0.617564	S	3	___2	Cdc2 kinase substrate motif;CDK kinase substrate motif;CDK1,2,4,6 kinase substrate motif;DNA dependent Protein kinase substrate motif;ERK1,2 kinase substrate motif;GSK-3, ERK1, ERK2, CDK5 substrate motif;MAPKAPK2 kinase substrate motif;WW domain binding motif
0.5763	0.466551	-0.445424	-0.307944	0.386127	0.637458	0.551361	0.154289	0.203703	0.172771	0.695238	0.467427	0.650757	0.933983	0.545096	0.0478436	0.34696	NaN	-0.0738579	-0.90173	1.28618	0.214592	0.672554	0.339303	0.761328	0.136545	0.359149	0.454261	NaN	0.299081	0.946137	0.211763	0.141098	0.606055	0.765977	0.384689	0.1856	-0.102729	-0.983931	-0.299574	0.144953	0.386127	0.255422	0.130705	0.406328	0.455024	S	3	___2	Cdc2 kinase substrate motif;CDK kinase substrate motif;CDK1,2,4,6 kinase substrate motif;DNA dependent Protein kinase substrate motif;ERK1,2 kinase substrate motif;G protein-coupled receptor kinase 1 substrate motif;Growth associated histone HI kinase substrate motif;GSK-3, ERK1, ERK2, CDK5 substrate motif;PKA kinase substrate motif;PKC kinase substrate motif;WW domain binding motif
NaN	-0.388169	-0.830808	NaN	0.365693	NaN	-0.102415	NaN	-0.420998	-0.0547411	NaN	0.180714	NaN	NaN	NaN	NaN	-0.375146	NaN	NaN	NaN	-0.383764	NaN	NaN	NaN	0.381399	-0.262263	0.380996	NaN	NaN	NaN	NaN	-0.603629	0.36283	NaN	NaN	0.00943071	NaN	NaN	NaN	-0.399284	NaN	-0.262263	0.00943071	-0.271694	0.205056	0.609911	S	3	___2	b-Adrenergic Receptor kinase substrate motif
-0.359841	-0.385741	-0.90084	-0.381375	0.0185795	-0.348398	-0.192009	-0.597867	-0.211301	-0.785246	0.195341	-0.193394	0.21354	0.570246	-0.433255	-0.389309	-0.540999	-0.0147038	-0.658644	-0.918191	0.0477052	-0.0903413	-0.0859948	-0.440457	-0.206503	-0.837249	-0.230936	-0.303957	-0.462396	-0.458301	-0.00231218	-0.618081	-0.902086	-0.240627	0.0983616	-0.115608	-0.0168694	-0.981047	-0.28002	-0.57896	-0.521177	-0.354119	-0.303957	-0.0501628	0.395342	0.525888	T	2	___2	Akt kinase substrate motif;b-Adrenergic Receptor kinase substrate motif;Calmodulin-dependent protein kinase II substrate motif;G protein-coupled receptor kinase 1 substrate motif;GSK-3, ERK1, ERK2, CDK5 substrate motif;PKC kinase substrate motif;WW domain binding motif
0.5763	0.466551	-0.445424	-0.307944	0.386127	0.637458	0.551361	0.154289	0.203703	0.172771	0.695238	0.467427	0.650757	0.933983	0.545096	0.0478436	0.34696	NaN	-0.0738579	-0.90173	1.28618	0.214592	0.672554	0.339303	0.761328	0.136545	0.359149	0.454261	NaN	0.299081	0.946137	0.211763	0.141098	0.606055	0.765977	0.384689	0.1856	-0.102729	-0.983931	-0.299574	0.144953	0.386127	0.255422	0.130705	0.406328	0.455024	T	3	___2	b-Adrenergic Receptor kinase substrate motif;Calmodulin-dependent protein kinase II substrate motif;G protein-coupled receptor kinase 1 substrate motif;GSK-3, ERK1, ERK2, CDK5 substrate motif;PKC kinase substrate motif;WW domain binding motif
NaN	-0.388169	-0.830808	NaN	0.365693	NaN	-0.102415	NaN	-0.420998	-0.0547411	NaN	0.180714	NaN	NaN	NaN	NaN	-0.375146	NaN	NaN	NaN	-0.383764	NaN	NaN	NaN	0.381399	-0.262263	0.380996	NaN	NaN	NaN	NaN	-0.603629	0.36283	NaN	NaN	0.00943071	NaN	NaN	NaN	-0.399284	NaN	-0.262263	0.00943071	-0.271694	0.205056	0.609911	T	3	___2	b-Adrenergic Receptor kinase substrate motif;Calmodulin-dependent protein kinase II substrate motif;Casein kinase II substrate motif;G protein-coupled receptor kinase 1 substrate motif;GSK-3, ERK1, ERK2, CDK5 substrate motif;PKC kinase substrate motif;WW domain binding motif
NaN	-0.260345	-0.836523	-0.683655	-0.0611876	NaN	-0.142436	NaN	-0.419082	-0.182371	-0.229024	NaN	NaN	-0.051352	NaN	-0.350641	-0.553949	NaN	NaN	NaN	-0.123546	NaN	-0.507164	NaN	NaN	NaN	-0.734349	NaN	NaN	NaN	NaN	NaN	NaN	NaN	-0.363992	-0.163243	-0.489735	NaN	NaN	-0.180216	-0.459837	-0.260345	-0.411915	0.15157	0.381151	0.599709	S	2	___3	14-3-3 domain binding motif;Akt kinase substrate motif;b-Adrenergic Receptor kinase substrate motif;Calmodulin-dependent protein kinase II substrate motif;ERK1,2 kinase substrate motif;G protein-coupled receptor kinase 1 substrate motif;GSK3 kinase substrate motif;GSK-3, ERK1, ERK2, CDK5 substrate motif;MAPKAPK1 kinase substrate motif;PKA kinase substrate motif;PKC kinase substrate motif;WW domai…
NaN	-0.260345	-0.836523	-0.683655	-0.0611876	NaN	-0.142436	NaN	-0.419082	-0.182371	-0.229024	NaN	NaN	-0.051352	NaN	-0.350641	-0.553949	NaN	NaN	NaN	-0.123546	NaN	-0.507164	NaN	NaN	NaN	-0.734349	NaN	NaN	NaN	NaN	NaN	NaN	NaN	-0.363992	-0.131987	-0.489735	NaN	NaN	-0.180216	-0.459837	-0.260345	-0.411915	0.15157	0.381151	0.638574	S	2	___3	Cdc2 kinase substrate motif;CDK kinase substrate motif;CDK1,2,4,6 kinase substrate motif;DNA dependent Protein kinase substrate motif;ERK1,2 kinase substrate motif;GSK-3, ERK1, ERK2, CDK5 substrate motif;MAPKAPK2 kinase substrate motif;WW domain binding motif
NaN	0.207944	NaN	-0.42407	-0.155878	-0.368533	-0.558591	-0.5441	-0.0755052	NaN	-0.605768	-0.41508	NaN	-0.267136	NaN	NaN	NaN	NaN	NaN	-0.289798	-0.548063	-0.798193	-0.703659	-0.781367	NaN	NaN	NaN	NaN	NaN	-0.935697	-0.389445	NaN	NaN	-0.826469	-0.255472	NaN	NaN	-1.02952	-1.18982	NaN	NaN	-0.42407	-0.881083	0.457013	0.103708	0.0728977	S	2	___1	BARD1 BRCT domain binding motif;Casein kinase II substrate motif
1.79636	1.66803	NaN	2.71909	2.57879	NaN	3.44317	2.24946	1.87304	2.534	4.2704	1.35746	NaN	-0.142581	3.39088	1.23815	2.81743	NaN	NaN	1.29262	1.2576	4.69192	NaN	2.74934	NaN	NaN	NaN	3.59189	2.76888	1.97778	1.15827	NaN	3.58737	3.61725	1.12127	4.41147	2.95437	2.80946	2.89752	3.23086	4.21671	2.39173	2.95437	-0.562643	0.0597466	0.126221	S	3	___1	14-3-3 domain binding motif;b-Adrenergic Receptor kinase substrate motif;Calmodulin-dependent protein kinase II substrate motif;Calmodulin-dependent protein kinase IV substrate motif;Chk1 kinase substrate motif;PKA kinase substrate motif;PKC kinase substrate motif
-1.67323	-0.968048	-1.13749	-2.3986	-1.7401	NaN	-1.41729	-1.01651	-0.450314	-3.10118	-1.13421	-0.591021	-0.714424	-0.476334	-2.54463	-1.03589	-2.03165	NaN	NaN	NaN	-1.18078	-1.4945	-1.53477	-1.97655	NaN	NaN	-1.3462	-1.1365	-3.0798	-2.88306	-2.01399	-0.828545	-1.58346	NaN	-0.650387	-2.42559	-2.32918	-2.42354	-2.59602	-3.03632	-2.20609	-1.29903	-2.26764	0.968604	0.00208058	0.031744	S	3	___2	Casein kinase I substrate motif;Casein kinase II substrate motif;DNA dependent Protein kinase substrate motif;ERK1,2 kinase substrate motif;G protein-coupled receptor kinase 1 substrate motif;GSK-3, ERK1, ERK2, CDK5 substrate motif;WW domain binding motif
-1.67323	-0.968048	-1.13749	-2.3986	-1.7401	NaN	-1.41729	-1.01651	-0.450314	-3.10118	-1.13421	-0.591021	-0.714424	-0.476334	-2.54463	-1.03589	-2.03165	NaN	NaN	NaN	-1.18078	-1.4945	-1.53477	-1.97655	NaN	NaN	-1.3462	-1.1365	-3.0798	-2.88306	-2.01399	-0.828545	-1.58346	NaN	-0.650387	-2.42559	-2.32918	-2.42354	-2.59602	-3.03632	-2.20609	-1.29903	-2.26764	0.968604	0.00208058	0.031744	S	3	___2	b-Adrenergic Receptor kinase substrate motif;Casein kinase II substrate motif;ERK1,2 kinase substrate motif;G protein-coupled receptor kinase 1 substrate motif;GSK-3, ERK1, ERK2, CDK5 substrate motif;WW domain binding motif
-1.1232	-0.486394	-0.389627	-0.0454871	0.90495	NaN	-0.0368261	NaN	-1.1706	NaN	-0.595724	-0.998136	NaN	-0.0122568	NaN	-1.00255	NaN	0.666543	NaN	NaN	NaN	-0.322119	NaN	NaN	NaN	NaN	NaN	NaN	NaN	NaN	-0.196663	NaN	-0.710641	-1.02659	-0.165841	NaN	-1.73907	NaN	NaN	NaN	-0.602773	-0.389627	-0.656707	0.26708	0.253077	0.226118	S	3	___1	Casein kinase II substrate motif;ERK1,2 kinase substrate motif;GSK-3, ERK1, ERK2, CDK5 substrate motif;MAPKAPK2 kinase substrate motif;WW domain binding motif
0.560031	0.841897	0.94247	0.964887	0.674529	0.388319	0.489319	0.0437026	1.41427	0.323632	1.43801	-0.227812	NaN	0.128779	0.978952	0.526465	1.4128	-0.311152	NaN	-0.00720603	-0.254999	1.39577	0.801781	0.942694	NaN	0.126466	NaN	0.592862	1.52646	0.672805	0.011901	1.31744	1.55549	0.0788331	-0.0224989	0.268042	0.89386	1.16288	0.69138	NaN	1.07665	0.560031	0.69138	-0.131349	0.319172	0.401629	S	3	___1	14-3-3 domain binding motif;Akt kinase substrate motif;Calmodulin-dependent protein kinase II substrate motif;ERK1,2 kinase substrate motif;GSK-3, ERK1, ERK2, CDK5 substrate motif;MAPKAPK1 kinase substrate motif;PKA kinase substrate motif;PKC kinase substrate motif;WW domain binding motif
-1.00186	2.88511	NaN	1.75798	1.84441	1.39062	NaN	2.73104	2.05454	2.04	1.60911	NaN	NaN	2.0119	-2.36358	1.3434	2.50172	1.49461	3.98238	NaN	-1.84356	-0.766733	NaN	NaN	NaN	2.37497	NaN	2.37406	2.02734	2.10709	-1.29702	2.76014	1.61669	2.2484	3.55759	NaN	2.14918	NaN	2.29077	3.06382	2.25181	1.80119	2.25011	-0.448914	0.101989	0.161037	T	3	___1	Aurora-A kinase substrate motif;Calmodulin-dependent protein kinase II substrate motif;Casein kinase II substrate motif;G protein-coupled receptor kinase 1 substrate motif;PAK2 kinase substrate motif;PKA kinase substrate motif;PKC kinase substrate motif
-0.142382	-0.509945	0.0887219	-0.418844	-0.662399	-0.168084	-0.0753937	-0.436544	-0.00651406	-0.248964	-0.508633	-0.558524	-1.07473	-0.77442	-0.179215	-0.177736	-0.220649	-0.851684	0.328213	-0.422873	-0.66289	-0.396858	-0.778638	-0.268524	-1.14727	-0.385966	NaN	-0.462679	-0.330946	0.0147201	-0.960844	0.0588526	0.144163	-0.0631776	-0.32035	-0.648395	-0.0240025	0.415162	-0.179096	0.355659	0.227245	-0.407851	-0.04359	-0.364261	0.145263	0.03136	S	3	___1	14-3-3 domain binding motif;b-Adrenergic Receptor kinase substrate motif;Calmodulin-dependent protein kinase II substrate motif;Casein kinase II substrate motif;PAK2 kinase substrate motif;PKA kinase substrate motif;PKC epsilon kinase substrate motif;PKC kinase substrate motif
-0.706496	-1.00751	-0.199907	-0.490713	-0.522257	-0.428491	-0.449775	-0.962608	-0.56066	-0.393247	-0.922251	-0.618704	-1.00405	-0.635433	-0.318738	-0.758612	-0.514898	NaN	NaN	-0.712102	-0.487842	-0.818595	-0.719245	-0.6565	NaN	-0.506889	NaN	-1.03588	-0.677671	-0.89782	-0.569872	-0.0327788	0.0450795	-0.627013	-0.860071	-0.715867	-0.687988	0.0144039	NaN	NaN	-0.10777	-0.618704	-0.652342	0.0336378	0.478372	0.362709	S	2	___1	14-3-3 domain binding motif;Calmodulin-dependent protein kinase II substrate motif;Casein kinase II substrate motif;G protein-coupled receptor kinase 1 substrate motif;PKA kinase substrate motif;PKC kinase substrate motif;ZIP kinase substrate motif
0.0559043	NaN	0.0853311	0.393781	-0.0690648	1.13967	0.656903	1.50952	NaN	-0.440526	1.51759	NaN	NaN	0.710654	1.08307	1.04888	1.06865	NaN	NaN	0.473647	NaN	0.446565	1.23642	0.333567	NaN	0.672709	NaN	1.29206	0.462151	0.392005	-0.967342	1.38934	0.594753	0.456292	0.713104	0.660189	1.27344	-0.75428	NaN	0.0940037	0.0922694	0.664806	0.462151	0.202655	0.321781	0.355164	S	3	___2	14-3-3 domain binding motif;b-Adrenergic Receptor kinase substrate motif;Calmodulin-dependent protein kinase II substrate motif;Casein kinase II substrate motif;PAK2 kinase substrate motif;PKA kinase substrate motif;PKC epsilon kinase substrate motif;PKC kinase substrate motif
1.40311	NaN	NaN	-0.178736	-0.0690648	1.13967	0.656903	1.50952	NaN	-0.440526	1.10991	NaN	NaN	0.454557	1.08307	1.04888	1.06865	NaN	NaN	0.473647	NaN	0.446565	0.873309	0.333567	NaN	0.672709	NaN	1.29206	0.462151	0.546369	-0.967342	1.38934	0.594753	0.456292	0.993317	0.660189	1.27344	-0.75428	NaN	0.0940037	0.0922694	0.672709	0.546369	0.12634	0.411649	0.396245	S	3	___2	ATM kinase substrate motif;b-Adrenergic Receptor kinase substrate motif;DNA dependent Protein kinase substrate motif;G protein-coupled receptor kinase 1 substrate motif;GSK3 kinase substrate motif
-1.69459	-1.59551	0.307124	-0.814291	-0.364553	-2.49984	-0.964853	-1.40569	-1.40298	NaN	-0.55087	-0.998378	-0.823469	-1.0887	-0.92722	NaN	-1.23216	-1.93014	NaN	-2.25249	-1.40143	-0.212054	-1.0875	NaN	NaN	-2.12028	NaN	-1.18279	-0.803912	-1.69291	-1.3419	NaN	-0.192342	-0.652681	-1.14992	-0.958486	-1.05023	-1.14869	NaN	-0.933901	NaN	-1.0887	-1.05023	-0.0384661	0.406738	0.343373	S	3	___2	Casein kinase I substrate motif;Casein kinase II substrate motif
-1.69459	-1.59551	0.307124	-0.814291	-0.364553	-2.49984	-0.964853	-1.40569	-1.40298	NaN	-0.55087	-0.998378	-0.823469	-1.0887	-0.92722	NaN	-1.23216	-1.89459	NaN	-2.25249	-1.40143	-0.212054	-1.0875	NaN	NaN	-2.12028	NaN	-1.18279	-0.803912	-1.69291	-1.3419	NaN	-0.192342	-0.652681	-1.14992	-0.958486	-1.05023	-1.14869	NaN	-0.933901	NaN	-1.0887	-1.05023	-0.0384661	0.406738	0.346982	S	3	___2	b-Adrenergic Receptor kinase substrate motif;BARD1 BRCT domain binding motif;Casein kinase II substrate motif;G protein-coupled receptor kinase 1 substrate motif
-0.239374	NaN	NaN	NaN	NaN	-0.36189	NaN	NaN	-0.190119	-0.189878	NaN	-0.0985214	NaN	NaN	0.253101	-0.693332	NaN	NaN	NaN	-0.114461	-0.608034	NaN	NaN	NaN	NaN	NaN	NaN	NaN	NaN	-0.245916	-0.349693	NaN	NaN	-0.398049	-1.1246	NaN	-0.335401	-0.198605	NaN	NaN	NaN	-0.190119	-0.342547	0.152427	0.380127	0.280722	S	4	___1	b-Adrenergic Receptor kinase substrate motif;BARD1 BRCT domain binding motif;Casein kinase II substrate motif
0.286019	NaN	NaN	1.1436	-0.0428734	0.710316	1.33947	0.732873	-0.165664	0.437713	NaN	-0.383879	NaN	-0.126081	NaN	-0.440037	0.226149	-0.625133	NaN	-0.0559419	-0.476098	0.70934	-0.193055	-0.301584	NaN	NaN	NaN	NaN	0.867691	0.569793	NaN	NaN	NaN	NaN	-0.580665	NaN	NaN	0.794221	0.54529	0.999	NaN	-0.0494077	0.682007	-0.731415	0.0237273	0.196644	S	3	___1	ATM kinase substrate motif;Casein kinase II substrate motif;DNA dependent Protein kinase substrate motif
0.676594	-0.415215	NaN	2.80308	0.119715	0.693572	NaN	0.90304	0.584509	0.594973	0.593181	-0.0263677	NaN	-0.0938816	0.312942	0.130714	0.387421	-0.0806138	NaN	NaN	NaN	1.01798	0.0140174	NaN	NaN	NaN	NaN	-0.185069	1.13551	0.684685	0.102642	NaN	-1.1832	1.19009	NaN	0.906084	0.351314	0.91059	0.482446	0.858459	0.955286	0.387421	0.771572	-0.384151	0.134127	0.897291	S	3	___2	b-Adrenergic Receptor kinase substrate motif;Casein kinase I substrate motif;Casein kinase II substrate motif;G protein-coupled receptor kinase 1 substrate motif;GSK3 kinase substrate motif
0.676594	-0.415215	NaN	2.80308	0.119715	0.693572	NaN	0.90304	0.584509	0.594973	0.593181	-0.0263677	NaN	-0.0938816	0.312942	0.130714	0.387421	-0.0806138	NaN	NaN	NaN	1.01798	0.0140174	NaN	NaN	NaN	NaN	-0.185069	1.13551	0.684685	0.102642	NaN	-1.25638	1.19009	NaN	0.906084	0.351314	0.91059	0.482446	0.858459	0.955286	0.387421	0.771572	-0.384151	0.134127	0.916733	S	3	___2	Casein kinase I substrate motif;MAPKAPK2 kinase substrate motif
NaN	-0.707487	-1.15386	-0.332378	NaN	NaN	0.142887	NaN	NaN	NaN	NaN	NaN	-0.859474	-1.17375	NaN	NaN	-1.38289	NaN	NaN	-0.476432	-0.868841	0.551442	NaN	-1.27946	NaN	NaN	NaN	-0.951099	0.313743	0.0146514	NaN	NaN	NaN	-0.639031	-0.737059	NaN	-0.528617	0.139155	NaN	NaN	NaN	-0.859474	-0.528617	-0.330857	0.165329	0.207534	S	2	___1	Casein kinase II substrate motif;Cdc2 kinase substrate motif;CDK kinase substrate motif;CDK1,2,4,6 kinase substrate motif;ERK1,2 kinase substrate motif;GSK-3, ERK1, ERK2, CDK5 substrate motif;WW domain binding motif
-0.741108	-0.928191	NaN	-0.228506	0.80517	NaN	0.120587	-0.154671	-0.329856	NaN	-1.32765	NaN	NaN	-0.843937	-0.174871	NaN	-1.36628	-0.743714	-0.441007	-0.447605	NaN	0.470332	NaN	NaN	NaN	-1.3859	NaN	NaN	-0.160007	-0.0977473	-0.612257	-0.276027	-0.551485	0.319046	-0.945786	0.26326	-0.405318	0.477659	-0.30301	NaN	NaN	-0.444306	-0.276027	-0.168279	0.286689	0.192912	S	2	___1	Casein kinase II substrate motif;Cdc2 kinase substrate motif;CDK kinase substrate motif;CDK1,2,4,6 kinase substrate motif;ERK1,2 kinase substrate motif;G protein-coupled receptor kinase 1 substrate motif;GSK3 kinase substrate motif;GSK-3, ERK1, ERK2, CDK5 substrate motif;WW domain binding motif
-1.0736	-0.168103	NaN	0.425294	NaN	NaN	-0.929071	NaN	NaN	1.17441	-0.0755565	NaN	NaN	NaN	0.309519	NaN	-0.775099	NaN	NaN	0.899133	NaN	-0.327765	NaN	NaN	NaN	NaN	NaN	NaN	NaN	-0.928018	NaN	0.919419	0.918547	1.50097	NaN	NaN	NaN	NaN	NaN	NaN	1.04342	-0.12183	0.919419	-1.04125	0.00286344	0.168265	S	2	___1	14-3-3 domain binding motif;Calmodulin-dependent protein kinase II substrate motif;Calmodulin-dependent protein kinase IV substrate motif;Casein kinase II substrate motif;G protein-coupled receptor kinase 1 substrate motif;MAPKAPK2 kinase substrate motif;MDC1 BRCT domain binding motif;PKA kinase substrate motif;PKC kinase substrate motif;Plk1 PBD domain binding motif;Pyruvate dehydrogenase kinase…
-0.419119	NaN	0.126848	0.810677	0.920608	0.85777	NaN	1.21148	0.21334	1.04038	-0.0579513	0.495288	NaN	0.614439	0.631621	0.455975	-0.580655	NaN	1.42756	1.29224	1.28423	0.0799843	-0.155647	0.527445	NaN	0.495288	NaN	NaN	0.494376	0.209525	0.563398	NaN	0.841577	1.42752	NaN	0.80022	0.545181	1.22522	0.545329	0.856877	0.893826	0.527445	0.80022	-0.272775	0.204283	0.171898	S	2	___1	14-3-3 domain binding motif;Calmodulin-dependent protein kinase II substrate motif;Calmodulin-dependent protein kinase IV substrate motif;Casein kinase II substrate motif;Chk1 kinase substrate motif;G protein-coupled receptor kinase 1 substrate motif;PKA kinase substrate motif;PKC kinase substrate motif
-0.780821	-0.69963	-0.293869	0.444369	0.541393	-0.387393	-0.323088	-0.443855	0.618155	0.0935771	-0.254255	-0.443843	-0.640699	-0.772733	0.0649509	-0.600166	-0.794434	0.0853913	-0.237901	-0.235031	-0.35397	0.716085	0.261082	NaN	-0.535976	-0.444258	NaN	-0.412915	0.334994	-0.0494712	-0.287333	0.0696872	-0.00750354	0.596815	-0.630319	1.13326	-0.413979	0.447783	-0.318087	0.494332	0.0316955	-0.323088	0.012096	-0.335184	0.162633	0.0810082	S	2	___2	14-3-3 domain binding motif;Calmodulin-dependent protein kinase II substrate motif;Calmodulin-dependent protein kinase IV substrate motif;Casein kinase II substrate motif;Chk1 kinase substrate motif;G protein-coupled receptor kinase 1 substrate motif;PKA kinase substrate motif;PKC kinase substrate motif
-0.780821	-0.69963	NaN	0.489342	0.885103	NaN	-0.116188	-0.555173	0.619071	0.0358526	-0.184698	-0.443843	-0.640699	-0.857276	0.159236	NaN	-0.910569	NaN	NaN	-0.235031	-0.35397	0.809906	0.260654	NaN	NaN	-0.271764	NaN	-0.526367	0.311522	-0.179818	-0.403072	0.0696872	-0.0770377	0.596815	-0.330971	NaN	-0.340923	0.447783	-0.266224	0.595335	NaN	-0.235031	-0.128428	-0.106603	0.341763	0.431276	S	3	___2	b-Adrenergic Receptor kinase substrate motif;Casein kinase II substrate motif;MAPKAPK2 kinase substrate motif
-0.884405	-0.572673	-0.293869	0.27035	0.494692	-0.178501	-0.529994	-0.332503	0.617239	0.180513	0.551742	-0.484933	-0.547232	-0.68824	0.0414219	-0.526824	-1.02663	0.135807	-0.237901	-0.161629	-0.224085	0.739182	0.31602	NaN	-0.535976	-0.444258	NaN	-0.412915	0.358476	0.130279	-0.273267	NaN	-0.00750354	0.644323	-0.671893	1.13326	-0.340923	0.460976	-0.21439	0.393341	0.110617	-0.237901	0.110617	-0.348519	0.154506	0.115944	S	2	___2	Casein kinase II substrate motif;G protein-coupled receptor kinase 1 substrate motif;MDC1 BRCT domain binding motif;Plk1 PBD domain binding motif
NaN	NaN	NaN	NaN	NaN	NaN	NaN	NaN	NaN	NaN	NaN	NaN	NaN	NaN	NaN	0.873789	-0.146446	0.616132	NaN	0.627904	-0.672018	NaN	NaN	NaN	NaN	NaN	NaN	NaN	1.27902	NaN	NaN	NaN	1.09482	1.82653	0.231104	NaN	0.662555	0.384086	NaN	NaN	NaN	0.616132	0.878686	-0.262554	0.211664	0.121796	T	2	___2	Growth associated histone HI kinase substrate motif;GSK-3, ERK1, ERK2, CDK5 substrate motif;PKA kinase substrate motif;PKC kinase substrate motif;RAF1 kinase substrate motif;WW domain binding motif
-0.959773	NaN	-0.421406	-1.06561	-0.0514366	NaN	NaN	NaN	NaN	NaN	NaN	NaN	NaN	NaN	NaN	0.0748257	NaN	NaN	NaN	-0.120958	NaN	NaN	NaN	NaN	NaN	NaN	-0.72398	NaN	NaN	NaN	-0.422196	NaN	-0.0699851	1.50365	-0.71475	0.448124	-0.404911	NaN	NaN	NaN	-0.925223	-0.271182	-0.413553	0.142371	0.392196	0.466023	S	2	___3	14-3-3 domain binding motif;Calmodulin-dependent protein kinase II substrate motif;Calmodulin-dependent protein kinase IV substrate motif;Casein kinase II substrate motif;Chk1 kinase substrate motif;G protein-coupled receptor kinase 1 substrate motif;PKA kinase substrate motif;PKC kinase substrate motif
-0.959773	NaN	-0.421406	-1.06561	-0.0514366	NaN	NaN	NaN	NaN	NaN	NaN	NaN	NaN	NaN	NaN	-1.1118	NaN	NaN	NaN	-2.25616	NaN	NaN	NaN	NaN	NaN	NaN	-0.72398	NaN	NaN	NaN	-0.422196	NaN	-0.0699851	NaN	-0.71475	0.448124	-0.404911	NaN	NaN	NaN	-0.925223	-1.01269	-0.422196	-0.590497	0.0518582	0.142073	S	3	___3	b-Adrenergic Receptor kinase substrate motif;Casein kinase II substrate motif;MAPKAPK2 kinase substrate motif
-0.959773	NaN	-0.421406	-1.06561	-0.0514366	NaN	NaN	NaN	NaN	NaN	NaN	NaN	NaN	NaN	NaN	0.0748257	NaN	NaN	NaN	-2.25616	NaN	NaN	NaN	NaN	NaN	NaN	-0.72398	NaN	NaN	NaN	-0.422196	NaN	-0.0699851	NaN	-0.71475	0.448124	-0.404911	NaN	NaN	NaN	-0.925223	-0.69059	-0.422196	-0.268394	0.207428	0.365405	S	2	___3	Casein kinase II substrate motif;G protein-coupled receptor kinase 1 substrate motif;MDC1 BRCT domain binding motif;Plk1 PBD domain binding motif
-0.283801	NaN	NaN	-1.0017	1.21562	-0.58702	NaN	0.410891	0.787719	NaN	-1.18549	-0.346326	-0.00715753	0.955657	NaN	-0.61576	NaN	0.053201	NaN	NaN	0.0286157	0.091826	0.150384	NaN	NaN	-0.361643	NaN	NaN	NaN	NaN	0.527192	-1.31876	-1.34789	-0.104663	0.766004	NaN	NaN	-0.0243488	NaN	NaN	NaN	0.0107291	-0.0645057	0.0752348	0.474892	0.623527	S	3	___1	ERK1, ERK2, SAPK, CDK5 and GSK3 kinase substrate motif;ERK1,2 kinase substrate motif;G protein-coupled receptor kinase 1 substrate motif;Growth associated histone HI kinase substrate motif;GSK3 kinase substrate motif;GSK-3, ERK1, ERK2, CDK5 substrate motif;WW domain binding motif
0.00507479	-0.311518	0.165211	-1.18872	NaN	-0.43805	1.32626	0.466602	1.18862	-0.962951	-0.583602	-0.0971643	0.625451	0.893256	0.240408	-0.762332	-0.843005	0.220386	NaN	NaN	-0.179043	0.97046	0.479396	NaN	1.1903	0.143373	NaN	NaN	-0.426016	0.011142	0.791898	-1.25251	-0.564361	0.352945	1.20442	NaN	-0.168919	-0.0685594	-0.213168	0.382946	0.105724	0.154292	-0.0287087	0.183001	0.344186	0.674556	S	3	___2	Casein kinase II substrate motif;ERK1,2 kinase substrate motif;G protein-coupled receptor kinase 1 substrate motif;Growth associated histone HI kinase substrate motif;GSK-3, ERK1, ERK2, CDK5 substrate motif;PKA kinase substrate motif;PKC kinase substrate motif;WW domain binding motif
-0.314252	-0.0998066	-0.319602	-1.3409	-0.848766	-0.961821	-0.732895	-1.41722	-1.8122	-0.772215	-1.52316	-1.47205	-0.0643201	-0.288133	-0.47139	-0.532503	-0.570963	-0.35845	NaN	-0.875254	-0.684038	-0.0137942	-1.07352	-0.265181	0.485371	-0.121208	-0.643258	-1.2615	0.123521	-0.298429	-0.94312	-1.89084	-0.844285	-1.0308	-0.921593	0.125943	-0.96306	-0.54006	-0.167139	-0.299574	-0.0525402	-0.570963	-0.643258	0.0722951	0.478565	0.924507	S	3	___2	ERK1, ERK2, SAPK, CDK5 and GSK3 kinase substrate motif;ERK1,2 kinase substrate motif;G protein-coupled receptor kinase 1 substrate motif;Growth associated histone HI kinase substrate motif;GSK3 kinase substrate motif;GSK-3, ERK1, ERK2, CDK5 substrate motif;WW domain binding motif
-0.358356	-0.0146106	-0.342835	-1.53853	-1.13693	-0.97243	-0.770675	-1.48693	-1.82976	-0.758224	-1.58101	-1.78253	-0.496965	-0.505133	-0.754299	-0.183834	-0.531182	-0.410908	NaN	-0.875254	-0.801173	-0.220175	-1.18519	-0.265181	0.452821	-0.137158	-0.643258	-1.2615	0.177129	-0.495758	-1.23209	-1.89283	-1.25013	-1.07237	-0.933572	0.125943	-1.04454	-0.636877	0.0420365	-0.304185	-0.220006	-0.754299	-0.643258	-0.111041	0.337667	0.878765	S	3	___2	ERK1,2 kinase substrate motif;G protein-coupled receptor kinase 1 substrate motif;GSK-3, ERK1, ERK2, CDK5 substrate motif;MAPKAPK2 kinase substrate motif;WW domain binding motif
-0.148862	-0.12779	-0.166112	-2.00687	-0.914794	-1.22515	-0.272688	-1.80523	NaN	-0.653842	-1.40498	NaN	-0.736427	-0.755947	-0.585687	0.023313	-0.248517	-0.411006	NaN	-0.398149	-0.882444	0.0116309	-0.888015	NaN	0.850832	-0.208567	-0.93532	-1.24333	NaN	-0.287792	-1.2962	NaN	-0.706884	-0.346044	-0.509098	NaN	-0.819019	-0.350086	-0.0502698	NaN	NaN	-0.498346	-0.607991	0.109645	0.43214	0.733951	S	3	___3	Casein kinase II substrate motif;ERK1,2 kinase substrate motif;G protein-coupled receptor kinase 1 substrate motif;Growth associated histone HI kinase substrate motif;GSK-3, ERK1, ERK2, CDK5 substrate motif;PKA kinase substrate motif;PKC kinase substrate motif;WW domain binding motif
-0.148862	-0.12779	-0.166112	-2.00687	-0.847766	-1.22515	-0.272688	-1.80832	NaN	-0.653842	-1.40498	NaN	-0.736427	-0.705762	-0.585687	0.023313	-0.248517	-0.411006	NaN	-0.398149	-0.63408	0.0116309	-0.94863	NaN	0.850832	-0.208567	-0.93532	-1.54118	NaN	-0.353341	-1.1621	NaN	-0.706884	-1.90611	-0.639924	NaN	-0.819019	-2.18369	0.0728159	NaN	NaN	-0.498346	-0.87717	0.378823	0.154957	0.106787	S	3	___3	ERK1, ERK2, SAPK, CDK5 and GSK3 kinase substrate motif;ERK1,2 kinase substrate motif;G protein-coupled receptor kinase 1 substrate motif;Growth associated histone HI kinase substrate motif;GSK3 kinase substrate motif;GSK-3, ERK1, ERK2, CDK5 substrate motif;WW domain binding motif
-0.148862	-0.12779	-0.166112	-2.00687	-0.847766	-1.22515	-0.272688	-1.80832	NaN	-0.653842	-1.40498	NaN	-0.736427	-0.705762	-0.585687	0.023313	-0.248517	-0.411006	NaN	-0.398149	-0.63408	0.0116309	-0.94863	NaN	0.850832	-0.208567	-0.93532	-1.54118	NaN	-0.353341	-1.1621	NaN	-0.706884	-1.90611	-0.639924	NaN	-0.819019	-2.18369	0.0728159	NaN	NaN	-0.498346	-0.87717	0.378823	0.154957	0.106787	S	3	___3	ERK1,2 kinase substrate motif;G protein-coupled receptor kinase 1 substrate motif;GSK-3, ERK1, ERK2, CDK5 substrate motif;MAPKAPK2 kinase substrate motif;WW domain binding motif
0.505944	0.531886	NaN	-0.0954268	NaN	0.801982	0.925818	0.657858	-0.359692	0.896181	-0.168892	-0.261211	NaN	NaN	1.31526	-0.0109787	0.825097	NaN	0.53648	0.437575	-0.11574	1.1398	0.996838	0.0440849	NaN	0.334644	NaN	-0.18843	NaN	1.41525	0.14344	0.372598	NaN	0.726619	NaN	0.947322	1.50282	NaN	1.04612	1.0823	1.15539	0.518915	0.996719	-0.477804	0.0896187	0.0908068	S	2	___1	14-3-3 domain binding motif;Calmodulin-dependent protein kinase II alpha substrate motif;Calmodulin-dependent protein kinase II substrate motif;Calmodulin-dependent protein kinase IV substrate motif;Casein kinase II substrate motif;Chk1 kinase substrate motif;PKA kinase substrate motif;PKC kinase substrate motif
-0.452503	NaN	-0.482065	0.0387882	0.192786	-0.0331464	NaN	NaN	NaN	NaN	-0.364381	0.186372	NaN	NaN	NaN	-0.372733	-0.312195	NaN	NaN	NaN	0.0751527	-0.352784	NaN	NaN	NaN	-0.552461	NaN	NaN	NaN	NaN	0.290868	NaN	-0.278422	NaN	NaN	-0.589727	NaN	NaN	NaN	-0.333548	-0.286405	-0.332489	-0.286405	-0.0460842	0.399306	0.828858	S	3	___1	Casein kinase I substrate motif;G protein-coupled receptor kinase 1 substrate motif;GSK3 kinase substrate motif;MDC1 BRCT domain binding motif;PKA kinase substrate motif;PKC kinase substrate motif;Plk1 PBD domain binding motif
NaN	-0.0449979	0.0571574	NaN	NaN	-0.0457058	-0.508598	-0.734421	0.441545	-0.439261	0.0979192	0.0806445	0.221439	NaN	-0.11763	0.00751309	-0.64311	0.0865518	NaN	-0.232595	-0.00991823	-0.0335299	0.257234	NaN	NaN	-0.75124	NaN	NaN	0.000126234	-0.1743	-0.20313	NaN	-0.286007	-0.0216403	0.425946	-0.0368787	NaN	0.166719	-0.562981	-0.1912	NaN	-0.0335299	-0.105589	0.0720593	0.47886	0.774962	S	2	___1	14-3-3 domain binding motif;Calmodulin-dependent protein kinase II substrate motif;Casein kinase II substrate motif;CLK1 kinase substrate motif;G protein-coupled receptor kinase 1 substrate motif;MDC1 BRCT domain binding motif;PAK2 kinase substrate motif;PKA kinase substrate motif;PKC epsilon kinase substrate motif;PKC kinase substrate motif;Plk1 PBD domain binding motif
1.36212	1.91143	2.28711	NaN	-0.168337	NaN	2.25916	1.21665	2.37345	1.83945	1.45084	2.38355	NaN	0.505014	1.60926	0.725893	NaN	1.47044	0.915069	2.14327	1.49624	1.72517	NaN	NaN	NaN	1.63017	3.06012	1.95509	1.25711	NaN	1.17046	NaN	NaN	1.10842	0.841211	0.360791	1.20628	1.50192	1.65141	2.0937	1.54651	1.60926	1.37952	0.229743	0.291947	0.831806	S	3	___1	ERK1,2 kinase substrate motif;G protein-coupled receptor kinase 1 substrate motif;Growth associated histone HI kinase substrate motif;GSK-3, ERK1, ERK2, CDK5 substrate motif;MAPKAPK2 kinase substrate motif;PKA kinase substrate motif;PKC kinase substrate motif;WW domain binding motif
-1.76799	NaN	-1.24185	-2.83641	NaN	-2.83171	-1.42041	-1.87684	-1.36185	-1.50263	-1.66954	-1.82989	NaN	-1.65381	-2.54643	-2.18354	-1.69605	-2.55144	-2.52496	-1.57965	-2.17678	-2.16992	-2.45773	-1.24549	NaN	-2.28335	NaN	-1.2833	-1.92282	-0.680938	-2.06412	-1.49714	-1.97621	-3.21664	-2.0996	NaN	-1.91631	-1.58019	-1.05115	-2.03959	-2.92117	-1.85336	-1.92282	0.0694567	0.482113	0.628865	S	2	___1	Cdc2 kinase substrate motif;CDK kinase substrate motif;CDK1,2,4,6 kinase substrate motif;ERK1,2 kinase substrate motif;G protein-coupled receptor kinase 1 substrate motif;Growth associated histone HI kinase substrate motif;GSK3 kinase substrate motif;GSK-3, ERK1, ERK2, CDK5 substrate motif;PKA kinase substrate motif;PKC kinase substrate motif;WW domain binding motif
-0.582864	NaN	NaN	0.318175	NaN	-0.949934	NaN	-1.06023	-0.700907	-0.688725	-0.0515226	NaN	NaN	-0.60153	-0.988097	-0.892704	NaN	NaN	-0.438747	-0.856963	-0.844741	NaN	-0.695061	NaN	NaN	NaN	NaN	-0.53943	NaN	-0.836034	-0.982459	-0.766155	NaN	-0.455227	-1.07221	NaN	-1.75526	-0.348319	NaN	NaN	-0.648872	-0.697984	-0.766155	0.068171	0.483721	0.322191	S	3	___1	14-3-3 domain binding motif;Akt kinase substrate motif;b-Adrenergic Receptor kinase substrate motif;Calmodulin-dependent protein kinase II substrate motif;Casein kinase II substrate motif;G protein-coupled receptor kinase 1 substrate motif;MAPKAPK1 kinase substrate motif;PKA kinase substrate motif;PKC kinase substrate motif;ZIP kinase substrate motif
-0.560173	-0.699925	-0.037392	-0.0306374	-1.34305	-0.631979	-0.83202	-0.327037	-0.179016	-0.503906	-0.193119	-0.767013	NaN	-0.433225	-0.193774	-1.01637	-0.678952	-0.612615	-0.797373	-0.237463	-0.929422	-0.69332	-0.882469	-0.483472	NaN	-0.619296	-0.17256	-0.417008	-1.05142	-0.360119	-0.592952	-0.309098	-0.258409	-0.354202	-1.07198	-1.52014	-0.195642	-0.244805	-0.507467	-0.574439	-0.404139	-0.615956	-0.404139	-0.211816	0.250537	0.775651	S	3	___1	ERK1,2 kinase substrate motif;Growth associated histone HI kinase substrate motif;GSK-3, ERK1, ERK2, CDK5 substrate motif;WW domain binding motif
NaN	-0.610254	-0.0674737	-0.315928	-1.06556	-0.621459	-0.732141	-0.500887	-0.139061	NaN	-0.323127	-0.736552	NaN	-0.419662	-0.160307	-0.891326	-0.607891	-0.741456	-0.738753	NaN	-0.673718	NaN	-0.95807	-0.409172	-1.17631	-0.514724	-0.151036	0.00704532	-0.868423	-0.197145	-0.447787	-0.103561	-0.216982	NaN	-1.13852	-1.47078	NaN	NaN	-0.305937	-0.49663	-0.529675	-0.610254	-0.376862	-0.233392	0.23356	0.512369	S	3	___2	14-3-3 domain binding motif;Akt kinase substrate motif;b-Adrenergic Receptor kinase substrate motif;Calmodulin-dependent protein kinase II substrate motif;Casein kinase II substrate motif;G protein-coupled receptor kinase 1 substrate motif;MAPKAPK1 kinase substrate motif;PKA kinase substrate motif;PKC kinase substrate motif;ZIP kinase substrate motif
NaN	-0.610254	-0.0674737	-0.315928	-1.06556	-0.621459	-0.732141	-0.500887	-0.139061	NaN	-0.323127	-0.736552	NaN	-0.371141	-0.160307	-0.891326	-0.607891	-0.741456	-0.738753	NaN	-0.673718	NaN	-0.95807	-0.409172	-1.17631	-0.514724	-0.151036	0.00704532	-0.868423	-0.197145	-0.447787	-0.103561	-0.216982	NaN	-1.13852	-1.47078	NaN	NaN	-0.305937	-0.49663	-0.529675	-0.610254	-0.376862	-0.233392	0.23356	0.522703	S	3	___2	b-Adrenergic Receptor kinase substrate motif;Casein kinase I substrate motif;Casein kinase II substrate motif;G protein-coupled receptor kinase 1 substrate motif;Pyruvate dehydrogenase kinase substrate motif
NaN	0.657192	NaN	0.958347	NaN	NaN	NaN	NaN	NaN	0.172051	NaN	NaN	NaN	NaN	NaN	0.400067	NaN	0.562873	NaN	NaN	1.07078	NaN	1.17708	NaN	NaN	NaN	NaN	NaN	-0.35469	NaN	0.451306	-0.877947	NaN	NaN	0.797142	-0.741457	NaN	NaN	NaN	NaN	NaN	0.657192	-0.35469	1.01188	0.00134347	0.0577789	T	2	___2	DNA dependent Protein kinase substrate motif;ERK1,2 kinase substrate motif;GSK3, Erk1, Erk2 and CDK5 kinase motif;GSK-3, ERK1, ERK2, CDK5 substrate motif;WW domain binding motif
1.47618	2.36897	NaN	1.73827	NaN	0.60731	NaN	1.19348	1.83919	NaN	1.74706	NaN	0.463618	0.964083	1.46037	NaN	1.20695	1.08187	NaN	NaN	1.66442	1.78686	NaN	NaN	NaN	NaN	NaN	1.26265	1.0068	0.928836	NaN	1.14694	NaN	1.12096	1.87088	NaN	0.965713	NaN	NaN	NaN	NaN	1.46827	1.12096	0.347316	0.179687	0.261746	S	2	___3	ERK1,2 kinase substrate motif;G protein-coupled receptor kinase 1 substrate motif;Growth associated histone HI kinase substrate motif;GSK3 kinase substrate motif;GSK-3, ERK1, ERK2, CDK5 substrate motif;PKA kinase substrate motif;PKC kinase substrate motif;WW domain binding motif
1.47618	2.36897	NaN	1.50116	NaN	0.60731	NaN	1.19348	1.97067	NaN	1.74706	NaN	0.463618	0.964083	1.46037	NaN	1.1511	1.08187	NaN	1.69301	1.67282	1.78686	1.17007	NaN	NaN	NaN	NaN	1.26265	1.0068	0.900634	NaN	0.913891	NaN	1.12096	1.87088	NaN	0.965713	NaN	NaN	NaN	NaN	1.46827	1.0068	0.46147	0.101211	0.188919	T	2	___3	G protein-coupled receptor kinase 1 substrate motif;GSK-3, ERK1, ERK2, CDK5 substrate motif;WW domain binding motif
1.47618	2.36897	NaN	1.50116	NaN	0.60731	NaN	1.19348	1.83919	NaN	1.74706	NaN	0.463618	0.964083	1.46037	NaN	1.1511	1.08187	NaN	1.69301	1.66442	1.78686	1.17007	NaN	NaN	NaN	NaN	1.26265	1.0068	0.900634	NaN	0.913891	NaN	1.12096	1.87088	NaN	0.965713	NaN	NaN	NaN	NaN	1.46827	1.0068	0.46147	0.101211	0.200713				DNA dependent Protein kinase substrate motif;ERK1,2 kinase substrate motif;GSK3, Erk1, Erk2 and CDK5 kinase motif;GSK-3, ERK1, ERK2, CDK5 substrate motif
-1.3299	NaN	NaN	NaN	NaN	NaN	NaN	NaN	-0.403909	0.328642	NaN	-0.255669	NaN	NaN	-0.33461	-2.1741	NaN	NaN	NaN	NaN	NaN	NaN	NaN	NaN	NaN	NaN	NaN	NaN	NaN	0.137882	-1.1771	-0.615896	NaN	NaN	NaN	NaN	NaN	-0.127681	-0.554714	NaN	NaN	-0.369259	-0.554714	0.185454	0.341357	0.61185	S	2	___1	Casein kinase II substrate motif;MAPKAPK2 kinase substrate motif;PKA kinase substrate motif;PKC kinase substrate motif
-1.20785	-2.16026	-1.54204	-1.71033	-2.02076	-2.26227	-2.60388	-1.15776	-1.64111	-1.78972	-2.61889	-2.18002	NaN	-2.077	-2.75299	-2.45219	-2.30152	-1.90182	-2.12043	-2.78201	-2.85797	-1.70879	-3.55627	-0.547548	NaN	-3.04705	-2.0351	-2.97246	-2.42908	-1.29816	-1.66801	-0.931668	-2.13765	-2.63887	-2.22539	-3.36963	-2.57361	-1.96444	-1.54911	-2.60711	-2.83288	-2.14034	-2.22539	0.0850463	0.462651	0.681646	S	4	___1	AMP-activated protein kinase substrate motif;HMGCoA Reductase kinase substrate motif;PKA kinase substrate motif;PKC kinase substrate motif
0.803874	NaN	1.98264	NaN	NaN	NaN	NaN	2.61224	0.361556	1.4237	NaN	-0.270717	NaN	0.739532	0.489149	0.370129	NaN	NaN	NaN	-0.0595816	1.20643	NaN	NaN	1.48714	NaN	1.15807	-0.197035	NaN	NaN	0.360088	NaN	NaN	0.538585	-1.02558	NaN	-0.229429	-0.348818	-0.000369008	NaN	NaN	NaN	0.803874	-0.197035	1.00091	0.00150347	0.00204292	S	2	___1	14-3-3 domain binding motif;Calmodulin-dependent protein kinase II substrate motif;G protein-coupled receptor kinase 1 substrate motif;PAK2 kinase substrate motif;PKA kinase substrate motif;PKC epsilon kinase substrate motif;PKC kinase substrate motif
-0.696663	NaN	NaN	-1.3353	NaN	NaN	NaN	NaN	-2.33506	0.325616	NaN	-0.775418	NaN	-1.96292	0.381631	-1.44533	0.1325	NaN	NaN	0.733575	-1.18154	NaN	NaN	NaN	NaN	NaN	NaN	NaN	NaN	0.112106	-2.04967	NaN	1.10042	-2.39221	NaN	NaN	-1.2307	NaN	0.30555	NaN	NaN	-0.775418	-0.559297	-0.216122	0.247098	0.941513	S	2	___2	14-3-3 domain binding motif;Calmodulin-dependent protein kinase II substrate motif;G protein-coupled receptor kinase 1 substrate motif;GSK3 kinase substrate motif;PKA kinase substrate motif;PKC kinase substrate motif
-0.696663	NaN	NaN	-1.3353	NaN	NaN	NaN	NaN	-2.33506	0.325616	NaN	-0.775418	NaN	-1.96292	0.381631	-1.44533	0.1325	NaN	NaN	0.733575	-1.18154	NaN	NaN	NaN	NaN	NaN	NaN	NaN	NaN	0.112106	-2.04967	NaN	1.10042	-2.39221	NaN	NaN	-1.2307	NaN	0.30555	NaN	NaN	-0.775418	-0.559297	-0.216122	0.247098	0.941513	S	2	___2	MAPKAPK2 kinase substrate motif
-2.52664	NaN	NaN	NaN	-0.863491	-1.93173	-0.37292	NaN	-2.808	NaN	NaN	NaN	NaN	-2.07178	NaN	NaN	-0.833562	-2.17996	0.310183	-0.738019	-1.55712	-0.558445	0.630967	NaN	NaN	NaN	NaN	-1.44293	0.342492	0.449332	-1.66049	NaN	0.471221	-2.15187	-2.76493	NaN	NaN	-1.31094	0.138897	NaN	NaN	-0.863491	-1.31094	0.447445	0.10922	0.551436	T	3	___1	AMP-activated protein kinase substrate motif;b-Adrenergic Receptor kinase substrate motif;Calmodulin-dependent protein kinase I substrate motif;Calmodulin-dependent protein kinase II alpha substrate motif;Calmodulin-dependent protein kinase II substrate motif;Calmodulin-dependent protein kinase IV substrate motif;Chk1 kinase substrate motif;PKC kinase substrate motif
0.470414	0.821517	0.71295	NaN	2.08018	1.60645	1.98328	0.920557	1.18862	NaN	1.62279	1.91731	2.39553	1.35022	0.601264	0.429438	0.647342	1.79641	1.51044	1.18109	1.39559	1.74237	2.04717	NaN	NaN	NaN	NaN	1.20382	1.52783	0.763993	1.6589	NaN	0.771676	0.979081	1.49212	1.84232	0.485246	0.314172	1.05424	NaN	1.42679	1.39559	1.12903	0.266556	0.253602	0.241388	T	2	___1	AMP-activated protein kinase substrate motif;b-Adrenergic Receptor kinase substrate motif;Calmodulin-dependent protein kinase I substrate motif;Calmodulin-dependent protein kinase II alpha substrate motif;Calmodulin-dependent protein kinase II substrate motif;Calmodulin-dependent protein kinase IV substrate motif;Chk1 kinase substrate motif;PKC kinase substrate motif
1.30199	NaN	0.878629	NaN	-1.49097	1.21709	0.254655	NaN	-0.181245	1.31132	NaN	-0.0385275	NaN	-0.38506	0.961402	-0.585116	0.656791	-1.11085	1.17373	NaN	0.00923413	NaN	NaN	0.696384	NaN	NaN	-1.00365	-0.680072	NaN	0.507369	0.34473	NaN	0.684524	1.19946	0.0800705	NaN	1.00312	NaN	0.978539	NaN	NaN	0.455723	0.507369	-0.0516462	0.393903	0.873552	S	2	___1	14-3-3 domain binding motif;Calmodulin-dependent protein kinase II substrate motif;Casein kinase II substrate motif;Phosphorylase kinase substrate motif;PKA kinase substrate motif;PKC epsilon kinase substrate motif;PKC kinase substrate motif
1.58519	1.24231	NaN	NaN	NaN	1.48343	1.564	1.88473	0.720075	1.2628	0.979459	0.53557	NaN	-0.0855036	1.02955	0.953449	1.18464	NaN	0.771909	NaN	NaN	0.929622	0.793939	1.92874	NaN	NaN	NaN	NaN	NaN	1.01668	1.2539	1.01091	0.751105	1.37449	1.21069	2.1281	NaN	NaN	1.30982	NaN	NaN	1.02955	1.23229	-0.202748	0.257864	0.428142	S	2	___1	14-3-3 domain binding motif;Calmodulin-dependent protein kinase II substrate motif;PKA kinase substrate motif;PKC kinase substrate motif
NaN	NaN	NaN	NaN	-0.792988	NaN	NaN	NaN	0.922381	0.902493	0.788853	0.294484	NaN	-0.999247	NaN	0.477974	0.480295	NaN	NaN	-0.0828958	-0.600704	0.303476	NaN	NaN	NaN	NaN	NaN	NaN	0.952474	0.583646	-0.25807	NaN	0.888214	0.573409	-0.350975	NaN	NaN	1.04871	0.940286	NaN	0.758816	0.303476	0.758816	-0.45534	0.0991351	0.139645	S	3	___1	ERK1,2 kinase substrate motif;Growth associated histone HI kinase substrate motif;GSK-3, ERK1, ERK2, CDK5 substrate motif;PKA kinase substrate motif;PKC kinase substrate motif;WW domain binding motif
0.677661	NaN	NaN	-1.15568	NaN	NaN	NaN	-0.806411	0.377935	0.76714	-0.573296	-0.0990145	NaN	-1.40583	0.772685	0.302702	0.602042	NaN	NaN	NaN	NaN	NaN	-1.18295	NaN	NaN	NaN	NaN	NaN	0.497041	0.214578	NaN	NaN	0.6701	NaN	-0.51045	-0.109437	0.723608	0.849045	0.410338	NaN	0.114001	0.101844	0.410338	-0.308494	0.17972	0.120076	S	3	___1	14-3-3 domain binding motif;Calmodulin-dependent protein kinase I substrate motif;Calmodulin-dependent protein kinase II substrate motif;Calmodulin-dependent protein kinase IV substrate motif;Casein kinase II substrate motif;Chk1 kinase substrate motif;PKA kinase substrate motif;PKC kinase substrate motif
-0.347108	-0.730138	-0.383461	-0.223912	-0.0862194	-0.19291	0.194315	-0.428541	-0.0470614	-0.106791	-0.0963275	-1.57782	-1.66107	-0.412159	0.073014	-0.895684	-0.377439	-0.660367	0.00695936	-0.699326	-0.563722	0.193703	-0.527491	-0.59854	-0.3586	-0.686366	-0.152373	-0.00063137	0.216501	0.129094	-0.403266	0.163854	-0.195998	0.00115591	-0.862191	-0.587227	-0.50497	-0.241087	-0.259274	-0.305267	-0.545409	-0.38045	-0.241087	-0.139363	0.311992	0.113803	S	3	___1	ERK1,2 kinase substrate motif;Growth associated histone HI kinase substrate motif;GSK-3, ERK1, ERK2, CDK5 substrate motif;PKA kinase substrate motif;PKC kinase substrate motif;WW domain binding motif
-0.14798	-0.437561	-0.114931	0.021622	0.563146	0.351516	0.20606	-0.450224	-0.263931	-0.144455	0.113289	-0.815508	-1.2268	-0.136249	-0.0036506	-0.350641	-0.245055	-0.226717	0.555685	-0.407232	-0.0671348	0.458979	-0.0706027	-0.227938	-0.30867	-0.245121	-0.258252	0.0757386	0.260639	-0.120136	0.0294422	0.242483	-0.0621122	0.205739	-0.166698	0.244425	-0.250615	0.0255078	-0.16565	0.0904159	0.124964	-0.146218	0.0294422	-0.17566	0.28039	0.0876993	S	4	___1	Casein kinase II substrate motif;PKA kinase substrate motif;PKC kinase substrate motif
0.337799	0.0565796	0.0202317	0.12372	0.60572	0.315112	0.523352	-0.0134078	-0.151077	0.30415	0.170918	-0.609599	-1.0934	0.0788603	0.295809	0.332792	0.0672531	0.104259	0.676754	-0.142587	0.168208	0.709441	0.552804	-0.134154	NaN	-0.219789	-0.309293	-0.072117	0.349187	0.21347	0.421851	0.436424	0.653228	0.637965	0.319993	0.442908	0.176784	0.409987	-0.0309031	0.126856	0.233289	0.12372	0.319993	-0.196273	0.263162	0.17669	S	4	___1	ATM kinase substrate motif;Casein kinase II substrate motif;DNA dependent Protein kinase substrate motif
NaN	NaN	0.0119123	0.83704	0.906588	0.345142	0.357957	NaN	-0.218109	0.264432	-0.0105647	-0.505838	NaN	-0.0971743	NaN	0.297954	0.0796409	-0.0280575	0.551786	-0.13751	-0.1009	NaN	NaN	NaN	NaN	NaN	NaN	NaN	0.234272	0.135237	0.198388	0.451762	NaN	0.63133	0.177035	NaN	NaN	NaN	-0.00844775	0.209651	0.0637166	0.0457766	0.198388	-0.152611	0.300279	0.534095	T	3	___1	Casein kinase I substrate motif
-1.57594	-1.56139	-1.49501	-0.849669	-0.652355	-1.10759	-0.832488	-1.18807	-1.10437	-1.44315	-2.41887	-2.18844	-2.14238	-0.938375	-1.53646	-2.35746	-0.867559	-1.19929	-1.08376	-1.69357	-1.71015	-1.25967	-2.21519	-1.22981	-1.15252	-1.59842	-0.86599	-1.20217	-1.53655	-1.28165	-1.21274	-0.702262	-1.45865	-1.29826	-2.16271	-1.94562	-1.47585	-0.954973	-1.21966	-1.92012	-1.46822	-1.35141	-1.29826	-0.0531495	0.392446	0.68631	S	4	___2	Casein kinase II substrate motif;PKA kinase substrate motif;PKC kinase substrate motif
-1.57594	-1.6065	-1.361	-0.849669	-0.652355	-1.0174	-0.832488	-1.18807	-1.06933	-1.44315	-2.41887	-2.37798	-2.15862	-1.01514	-1.61738	-2.35746	-0.867559	-1.19929	-1.08376	-1.6002	-1.71015	-1.25967	-2.21519	-1.3044	-1.15252	-1.59842	-1.43703	-1.19037	-1.42307	-1.28165	-1.21274	-0.702262	-1.45865	-1.29826	-2.09291	-1.94562	-1.47585	-0.954973	-1.05605	-1.92012	-1.43729	-1.3327	-1.42307	0.0903715	0.45602	0.716083	S	4	___2	ATM kinase substrate motif;Casein kinase II substrate motif;DNA dependent Protein kinase substrate motif
-1.17777	NaN	-1.20855	-0.8617	0.26569	-1.33679	-2.2031	-2.08382	-1.95706	-0.289753	-2.22331	-1.90779	NaN	0.594605	-0.737539	NaN	-1.24743	-2.62435	-1.32455	-1.66923	-1.98581	-2.07462	-2.17981	NaN	NaN	-1.95739	-2.28344	-2.60497	-0.887811	NaN	NaN	NaN	NaN	-0.697317	-2.66167	-1.39281	-0.605536	-0.288947	-0.536632	-0.593783	NaN	-1.66923	-0.792564	-0.876665	0.00943067	0.604439	S	2	___1	Casein kinase II substrate motif;ERK1,2 kinase substrate motif;GSK-3, ERK1, ERK2, CDK5 substrate motif;PKA kinase substrate motif;WW domain binding motif
NaN	NaN	-1.20049	-0.812497	NaN	NaN	NaN	NaN	NaN	-0.284677	NaN	-1.86596	NaN	NaN	NaN	-1.43167	-1.19971	-2.66592	NaN	NaN	NaN	-1.95479	NaN	-1.88509	NaN	NaN	-2.19694	NaN	NaN	-0.945567	-1.92727	-0.301449	-1.67114	-0.639901	NaN	-1.84877	NaN	NaN	-0.479474	-1.12664	-1.39279	-1.43167	-1.25971	-0.171957	0.283542	0.483552	T	3	___1	Casein kinase II substrate motif;G protein-coupled receptor kinase 1 substrate motif;PKA kinase substrate motif;PKC kinase substrate motif
-3.07817	0.209102	-0.196666	-4.36931	-4.33984	0.475144	-0.830849	-0.638729	-0.400108	-2.93556	-4.02083	-3.71697	NaN	-2.36123	-3.81372	-3.91106	-4.58094	-4.13183	0.467377	-4.27525	-3.66082	-4.20571	-4.38136	0.799105	-7.2776	-0.467164	-0.215235	NaN	0.213144	-2.63792	-3.62536	-2.59466	-2.34194	-0.807981	-3.78736	-4.28386	-3.03225	-2.75758	NaN	-3.65354	0.336228	-3.66082	-2.63792	-1.0229	0.00329588	0.542016	S	2	___2	Casein kinase II substrate motif;ERK1,2 kinase substrate motif;GSK-3, ERK1, ERK2, CDK5 substrate motif;PKA kinase substrate motif;WW domain binding motif
-3.07817	-1.91724	-3.8695	-4.36931	-4.29743	-3.95494	-4.96883	-0.638729	-0.400108	-2.93556	-4.02083	-3.55935	NaN	-4.05918	-3.81187	-4.13297	-4.58094	-5.10408	0.467377	-4.26877	-3.54678	-3.97092	-4.65188	0.799105	-7.2776	-2.9041	-0.215235	-4.65611	-1.80883	-2.63792	-3.62536	-2.54302	-2.32148	-3.13366	-3.68132	-4.17057	-3.04402	0.788881	NaN	-3.71082	-1.72791	-3.95494	-2.84097	-1.11397	0.00160813	0.152413	S	2	___2	Cdc2 kinase substrate motif;CDK kinase substrate motif;CDK1,2,4,6 kinase substrate motif;DNA dependent Protein kinase substrate motif;ERK1,2 kinase substrate motif;G protein-coupled receptor kinase 1 substrate motif;Growth associated histone HI kinase substrate motif;GSK-3, ERK1, ERK2, CDK5 substrate motif;PKA kinase substrate motif;PKC kinase substrate motif;WW domain binding motif
-3.06823	-4.17935	-3.87349	NaN	-4.25502	NaN	-4.83733	NaN	NaN	NaN	NaN	-2.55562	NaN	-4.31421	-3.81004	-4.02269	NaN	-5.10408	NaN	-4.46036	-3.58866	NaN	-4.92236	NaN	NaN	-5.34098	NaN	-4.65611	-3.89386	-2.63792	-4.41212	-2.37496	-2.301	-2.94156	-3.66974	-4.05733	-3.05065	-2.84907	NaN	-3.76818	-3.82122	-4.21718	-3.66974	-0.547448	0.0644299	0.0186202	T	3	___2	Casein kinase II substrate motif;G protein-coupled receptor kinase 1 substrate motif;PKA kinase substrate motif;PKC kinase substrate motif
-1.13947	NaN	NaN	NaN	NaN	-1.45254	-1.49943	NaN	NaN	-0.294693	NaN	-1.65093	NaN	NaN	-1.50414	-1.65147	-0.0696652	-1.63129	NaN	NaN	-1.47167	NaN	NaN	NaN	NaN	NaN	NaN	NaN	-1.47697	-0.448691	NaN	NaN	0.0432711	2.14299	-2.26126	NaN	NaN	-0.495859	-0.895443	NaN	-1.14745	-1.48555	-0.695651	-0.789896	0.0166024	0.209142	S	3	___1	BARD1 BRCT domain binding motif;Casein kinase I substrate motif;Casein kinase II substrate motif;PKA kinase substrate motif;PKC kinase substrate motif
NaN	NaN	NaN	NaN	NaN	NaN	NaN	NaN	NaN	1.65102	2.19363	NaN	NaN	NaN	NaN	1.17914	NaN	NaN	NaN	1.37983	1.03628	1.62873	NaN	NaN	NaN	NaN	NaN	NaN	NaN	1.99316	1.5003	NaN	1.20962	2.30651	0.716135	NaN	2.30594	1.52643	1.54808	NaN	NaN	1.50428	1.53726	-0.0329746	0.412116	0.62983	S	2	___1
-1.69657	NaN	NaN	-0.606531	NaN	-0.459513	NaN	-2.04777	-0.909541	0.829774	-0.688179	NaN	NaN	NaN	0.616629	NaN	-0.176855	NaN	NaN	NaN	NaN	0.445909	-0.605747	NaN	NaN	NaN	NaN	NaN	-0.338088	0.699924	-1.94061	-1.46046	-4.26385	0.447621	-1.55515	NaN	NaN	0.395384	-1.22447	NaN	0.362903	-0.605747	-0.781278	0.17553	0.352854	0.476996	S	2	___1	Casein kinase II substrate motif
-0.197978	0.22538	NaN	-0.51441	NaN	-0.678028	-1.73323	-1.91263	-1.01003	0.436703	-1.35161	0.0378778	-0.331793	-1.36391	0.440103	0.0276091	-0.35435	-1.12606	NaN	0.04547	-0.909743	-1.87433	-0.984988	0.298277	NaN	-1.51477	-0.65794	-1.15476	-2.77759	-0.763161	-1.58075	-0.0819806	0.264858	0.201233	-0.896643	-2.54586	0.728436	0.207527	-0.218863	0.388898	-0.330515	-0.596219	-0.330515	-0.265704	0.209372	0.905859	S	3	___1	14-3-3 domain binding motif;Akt kinase substrate motif;Calmodulin-dependent protein kinase II substrate motif;Casein kinase II substrate motif;ERK1,2 kinase substrate motif;Growth associated histone HI kinase substrate motif;GSK-3, ERK1, ERK2, CDK5 substrate motif;MAPKAPK1 kinase substrate motif;MAPKAPK2 kinase substrate motif;PKA kinase substrate motif;PKC epsilon kinase substrate motif;PKC kina…
0.380667	0.14587	NaN	NaN	-2.09213	NaN	-1.09279	NaN	-0.497871	0.254467	-1.04656	0.653086	NaN	-0.709222	0.615579	0.297838	0.500538	NaN	-0.37659	0.515299	-0.156569	-1.25488	-0.906759	NaN	NaN	NaN	NaN	-1.16798	-1.33692	0.0470135	-0.612421	NaN	1.31394	0.795243	-0.289457	NaN	0.983047	NaN	0.0861379	NaN	-0.364061	-0.156569	-0.121222	-0.0353478	0.409789	0.515754	S	2	___1	DNA dependent Protein kinase substrate motif;ERK1,2 kinase substrate motif;G protein-coupled receptor kinase 1 substrate motif;GSK-3, ERK1, ERK2, CDK5 substrate motif;WW domain binding motif
0.154356	0.0928527	-0.70241	-1.55034	-2.39912	-0.198734	-1.18739	-1.72412	-0.929218	0.255426	-1.44466	0.403202	-1.31299	-1.17697	0.125584	-0.0252788	0.428364	-1.19316	-0.957316	0.0552331	-0.499581	-1.53477	-1.71674	0.311328	NaN	-1.56849	NaN	-1.55638	-1.74949	-0.0791761	-0.985535	-0.73324	0.8096	0.514196	-0.174959	-1.74921	0.661755	-0.105466	-0.0475633	0.404973	-0.802416	-0.929218	-0.140212	-0.789005	0.0166954	0.258984	S	2	___1	14-3-3 domain binding motif;Akt kinase substrate motif;AMP-activated protein kinase 2 substrate motif;Calmodulin-dependent protein kinase II substrate motif;Casein kinase II substrate motif;MAPKAPK1 kinase substrate motif;PKA kinase substrate motif;PKC kinase substrate motif
-0.411181	0.0307985	-0.706157	-1.66822	1.37907	-0.701138	-0.93756	-2.00872	-1.17031	0.396232	-2.39461	-0.678883	-1.15731	-1.15896	-0.776497	-0.574225	0.0219227	-1.87065	0.497026	-0.813999	-0.375213	-2.44014	-1.92764	0.811668	-2.18325	-1.31997	0.460146	-2.33303	-1.81634	-0.178138	-1.0906	-0.200275	0.103669	-0.176812	-0.928691	-1.99519	0.352016	0.478417	-0.0960989	1.0363	-1.32192	-0.795248	-0.178138	-0.61711	0.0451169	0.308496	S	3	___2	14-3-3 domain binding motif;Akt kinase substrate motif;Calmodulin-dependent protein kinase II substrate motif;Casein kinase II substrate motif;ERK1,2 kinase substrate motif;Growth associated histone HI kinase substrate motif;GSK-3, ERK1, ERK2, CDK5 substrate motif;MAPKAPK1 kinase substrate motif;MAPKAPK2 kinase substrate motif;PKA kinase substrate motif;PKC epsilon kinase substrate motif;PKC kina…
-0.411181	0.0307985	-0.706157	-1.66822	1.37907	-0.701138	-0.93756	-2.00872	-1.17031	0.396232	-2.39461	-0.678883	-1.15731	-1.15896	-0.776497	-0.574225	0.0219227	-1.87065	0.497026	-0.813999	-0.375213	-2.44014	-1.92764	0.811668	-2.18325	-1.31997	0.460146	-2.33303	-1.81634	-0.178138	-1.0906	-0.200275	0.103669	-0.176812	-0.928691	-1.99519	0.352016	0.478417	-0.0960989	1.0363	-1.32192	-0.795248	-0.178138	-0.61711	0.0451169	0.308496	S	3	___2	14-3-3 domain binding motif;Akt kinase substrate motif;Calmodulin-dependent protein kinase II substrate motif;Cdc2 kinase substrate motif;CDK kinase substrate motif;CDK1,2,4,6 kinase substrate motif;CLK1 kinase substrate motif;DNA dependent Protein kinase substrate motif;ERK1,2 kinase substrate motif;GSK-3, ERK1, ERK2, CDK5 substrate motif;MAPKAPK1 kinase substrate motif;PKA kinase substrate moti…
0.966681	0.201276	-0.47591	-0.864422	-2.19201	0.0715618	-0.147295	-1.385	-0.122814	0.359353	-0.865211	0.438203	-0.494809	-0.850994	0.824089	0.195807	0.640349	-0.719727	NaN	0.877362	-0.268476	-0.934415	-1.22138	0.729831	-1.73143	-0.874446	1.12443	-1.16765	-1.261	0.0382828	-0.645615	-0.151362	1.42931	1.07072	-0.28683	-1.22712	0.844602	0.784485	0.222951	0.678576	-0.40205	-0.268476	0.0382828	-0.306759	0.180868	0.193804	S	3	___3	14-3-3 domain binding motif;Akt kinase substrate motif;Calmodulin-dependent protein kinase II substrate motif;Casein kinase II substrate motif;ERK1,2 kinase substrate motif;Growth associated histone HI kinase substrate motif;GSK-3, ERK1, ERK2, CDK5 substrate motif;MAPKAPK1 kinase substrate motif;MAPKAPK2 kinase substrate motif;PKA kinase substrate motif;PKC epsilon kinase substrate motif;PKC kina…
0.966681	0.201276	-0.47591	-0.864422	-2.19201	0.0715618	-0.147295	-1.385	-0.122814	0.359353	-0.865211	0.438203	-0.494809	-0.850994	0.824089	0.195807	0.640349	-0.719727	NaN	0.877362	-0.268476	-0.934415	-1.22138	0.729831	-1.73143	-0.874446	1.12443	-1.16765	-1.261	0.0382828	-0.645615	-0.151362	1.42931	1.07072	-0.28683	-1.22712	0.844602	0.784485	0.222951	0.678576	-0.40205	-0.268476	0.0382828	-0.306759	0.180868	0.193804	S	3	___3	14-3-3 domain binding motif;Akt kinase substrate motif;Calmodulin-dependent protein kinase II substrate motif;Cdc2 kinase substrate motif;CDK kinase substrate motif;CDK1,2,4,6 kinase substrate motif;CLK1 kinase substrate motif;DNA dependent Protein kinase substrate motif;ERK1,2 kinase substrate motif;GSK-3, ERK1, ERK2, CDK5 substrate motif;MAPKAPK1 kinase substrate motif;PKA kinase substrate moti…
0.966681	0.201276	-0.47591	-0.864422	-2.19201	0.0715618	-0.147295	-1.385	-0.122814	0.359353	-0.865211	0.438203	-0.494809	-0.850994	0.824089	0.195807	0.640349	-0.719727	NaN	0.877362	-0.268476	-0.934415	-1.22138	0.729831	-1.73143	-0.874446	1.12443	-1.16765	-1.261	0.0382828	-0.645615	-0.151362	1.42931	1.07072	-0.28683	-1.22712	0.844602	0.784485	0.222951	0.678576	-0.40205	-0.268476	0.0382828	-0.306759	0.180868	0.193804	S	2	___3	DNA dependent Protein kinase substrate motif;ERK1,2 kinase substrate motif;G protein-coupled receptor kinase 1 substrate motif;GSK-3, ERK1, ERK2, CDK5 substrate motif;WW domain binding motif
-0.357546	NaN	-0.0955827	-0.0851459	0.218094	0.332904	-0.172091	NaN	0.0506481	-0.226801	-0.230296	-0.0479563	0.0825803	0.100606	-0.145777	-0.294368	-0.398209	-0.193286	NaN	-0.127163	-0.349012	-0.0915876	0.0584333	NaN	NaN	-0.154925	NaN	-0.118484	-0.272706	-0.194331	-0.0408208	NaN	0.0394614	-0.339566	-0.302128	NaN	NaN	-0.181868	-0.292397	NaN	NaN	-0.127163	-0.194331	0.0671684	0.484975	0.154257	S	3	___1	Casein kinase I substrate motif;PKA kinase substrate motif;PKC kinase substrate motif
NaN	2.00959	NaN	NaN	NaN	1.3629	NaN	NaN	-0.388008	0.955007	NaN	1.86564	NaN	0.285871	NaN	NaN	0.865265	NaN	NaN	1.90541	2.32664	0.758893	NaN	NaN	NaN	NaN	NaN	NaN	0.945774	1.03901	NaN	NaN	1.15597	0.476302	NaN	NaN	NaN	NaN	NaN	NaN	2.09398	1.15895	1.03901	0.119943	0.419475	0.892167	S	3	___1	Casein kinase II substrate motif;PKA kinase substrate motif;PKC kinase substrate motif
3.10094	NaN	2.02661	NaN	NaN	NaN	2.9156	2.42292	3.79545	2.59276	2.88454	2.31126	-0.421799	NaN	3.76122	2.33198	3.71709	0.0167952	NaN	2.00121	0.547615	2.6433	1.93462	NaN	NaN	0.943286	NaN	2.20462	NaN	2.40991	1.3294	2.42628	3.49526	3.29572	1.79252	3.37528	3.9533	3.47922	2.19785	3.05615	2.89592	2.37745	2.89592	-0.518476	0.0741446	0.12589	S	2	___1	ERK1,2 kinase substrate motif;Growth associated histone HI kinase substrate motif;GSK-3, ERK1, ERK2, CDK5 substrate motif;PKA kinase substrate motif;PKC kinase substrate motif;WW domain binding motif
NaN	NaN	NaN	NaN	NaN	NaN	NaN	NaN	1.87229	NaN	3.562	-0.720438	NaN	1.76437	NaN	NaN	1.47556	NaN	NaN	1.85875	NaN	1.97541	NaN	NaN	NaN	NaN	NaN	5.06962	1.58166	2.13692	NaN	-0.368488	NaN	NaN	NaN	NaN	2.41039	1.57905	NaN	2.60986	4.54805	1.85875	2.27365	-0.414903	0.11809	0.343234	S	3	___1	G protein-coupled receptor kinase 1 substrate motif
0.000183304	NaN	1.9881	NaN	1.11042	1.06853	0.623411	NaN	1.42285	NaN	NaN	0.874582	0.974117	1.4632	NaN	0.418788	-0.0595344	1.75926	1.27604	1.00751	0.802395	0.663403	0.902899	NaN	NaN	NaN	2.35232	1.77589	0.121247	0.14608	0.903129	NaN	0.487028	-0.491866	0.378817	-1.18646	0.296879	0.3495	NaN	NaN	0.74803	0.974117	0.364159	0.609958	0.0408833	0.135909	S	3	___1	Casein kinase II substrate motif;DNA dependent Protein kinase substrate motif;ERK1,2 kinase substrate motif;GSK-3, ERK1, ERK2, CDK5 substrate motif;WW domain binding motif
NaN	NaN	3.38104	NaN	2.4039	NaN	NaN	NaN	NaN	NaN	3.03171	NaN	NaN	NaN	2.28818	0.484943	0.963595	NaN	NaN	NaN	NaN	NaN	-1.76058	NaN	NaN	NaN	NaN	NaN	2.82298	2.00176	NaN	2.2335	NaN	NaN	NaN	2.35782	NaN	NaN	2.48258	1.953	NaN	2.28818	2.29566	-0.00747681	0.437287	0.306089	S	3	___1	14-3-3 domain binding motif;Calmodulin-dependent protein kinase II substrate motif;G protein-coupled receptor kinase 1 substrate motif;PKA kinase substrate motif;PKA, PKG kinase substrate motif;PKC epsilon kinase substrate motif;PKC kinase substrate motif;PKG kinase substrate motif
0.353645	0.551384	0.646281	NaN	0.732208	0.249558	NaN	0.486129	2.02995	-0.105427	NaN	1.05966	2.40081	NaN	0.497215	NaN	NaN	0.528242	0.779194	0.551798	0.693215	0.629178	0.20641	0.167554	1.80248	0.111133	1.19094	1.83322	NaN	0.314214	0.248287	NaN	NaN	0.838708	NaN	1.07317	0.244459	0.181579	0.194327	0.260717	0.702315	0.551591	0.314214	0.237377	0.283778	0.735263	S	3	___1	b-Adrenergic Receptor kinase substrate motif;Casein kinase II substrate motif;PKA kinase substrate motif;PKC kinase substrate motif
1.19481	1.21801	0.974874	0.264816	0.819942	1.12281	1.54626	1.25551	-0.0635302	0.275997	0.41811	0.162094	-0.372169	-0.532026	-0.454066	0.910161	-0.640457	NaN	1.20183	0.090524	-0.0985624	0.938689	0.314688	1.91584	-0.184309	-0.170726	NaN	1.06876	0.681866	1.20967	0.492571	0.851159	-0.83583	-0.170902	0.954557	0.524502	0.414028	0.0581592	1.02608	-0.133523	-0.835039	0.314688	0.508537	-0.193849	0.265159	0.650085	S	3	___1	Aurora-A kinase substrate motif;Casein kinase II substrate motif;G protein-coupled receptor kinase 1 substrate motif;GSK3 kinase substrate motif;PAK2 kinase substrate motif;Phosphorylase kinase substrate motif;PKA kinase substrate motif;PKC kinase substrate motif;Pyruvate dehydrogenase kinase substrate motif
-0.415871	0.0932092	-0.267982	NaN	1.73087	0.851969	0.37482	NaN	0.157018	-0.453839	NaN	NaN	0.159471	NaN	-0.272768	NaN	NaN	NaN	0.595336	0.226299	0.483677	-0.831954	NaN	1.03095	NaN	0.412901	NaN	0.367224	NaN	-0.156688	1.01175	NaN	-0.312685	-0.695535	NaN	-0.0449062	-0.822462	-0.470969	0.143657	-0.850941	-0.0553776	0.192885	-0.156688	0.349573	0.177837	0.0863184	S	2	___1	Akt kinase substrate motif;Casein kinase II substrate motif;G protein-coupled receptor kinase 1 substrate motif;GSK3 kinase substrate motif;PKA kinase substrate motif;PKC kinase substrate motif
-0.566083	-0.846835	-0.760796	-1.08024	-0.706942	-0.609722	-0.292838	-0.765865	-1.41902	-1.64556	-0.807172	NaN	NaN	NaN	-2.02952	-0.217007	NaN	NaN	-0.769035	-1.24767	-0.815929	-0.726146	-1.325	-0.147891	-0.659601	-1.56892	-1.30295	-0.116587	NaN	-1.55475	-0.996973	-0.891071	-0.597063	-1.0931	-0.566329	-1.03036	-1.4427	-1.37918	-0.979473	-1.58446	-0.758918	-0.769035	-1.01366	0.24463	0.276119	0.457379	S	3	___2	Aurora-A kinase substrate motif;Casein kinase II substrate motif;G protein-coupled receptor kinase 1 substrate motif;GSK3 kinase substrate motif;PAK2 kinase substrate motif;Phosphorylase kinase substrate motif;PKA kinase substrate motif;PKC kinase substrate motif;Pyruvate dehydrogenase kinase substrate motif
-0.566083	-0.946668	-0.760796	-1.08024	-0.706942	-0.609722	-0.292838	-0.765865	-1.41902	-1.74874	-0.807172	NaN	NaN	NaN	-2.02952	-0.217007	NaN	NaN	-0.769035	-1.24767	-0.815929	-0.726146	-1.325	-0.147891	-0.659601	-1.56892	-1.30295	-0.116587	NaN	-1.55475	-0.996973	-0.891071	-0.597063	-1.0931	-0.566329	-1.03036	-1.4427	-1.37918	-0.979473	-1.58446	NaN	-0.769035	-1.03036	0.261321	0.258889	0.437103	S	2	___2	Akt kinase substrate motif;Casein kinase II substrate motif;G protein-coupled receptor kinase 1 substrate motif;GSK3 kinase substrate motif;PKA kinase substrate motif;PKC kinase substrate motif
NaN	-0.0097745	0.221673	-0.337283	0.484747	0.19475	0.0916911	NaN	0.164177	-0.935364	0.0885683	NaN	NaN	-0.86056	NaN	-0.577817	NaN	-0.685482	NaN	-0.375988	NaN	0.0847134	-0.183863	NaN	NaN	-1.01007	-1.29853	NaN	-0.692716	NaN	NaN	NaN	-0.785384	-1.28984	-0.124185	NaN	NaN	-1.04089	-0.67997	-0.545873	0.118473	-0.0968187	-0.692716	0.595897	0.0449037	0.0286589	S	3	___1	14-3-3 domain binding motif;Akt kinase substrate motif;Calmodulin-dependent protein kinase II substrate motif;Casein kinase II substrate motif;G protein-coupled receptor kinase 1 substrate motif;MAPKAPK1 kinase substrate motif;PKA kinase substrate motif;PKC kinase substrate motif
NaN	NaN	NaN	0.540928	NaN	NaN	NaN	1.38686	0.290304	NaN	-0.437252	-0.0997537	NaN	NaN	-0.167119	-0.0734028	NaN	NaN	NaN	0.877928	-0.224796	NaN	0.382998	-1.71509	0.847607	0.663687	0.0557405	1.47186	NaN	-0.388876	0.377239	NaN	-1.41947	NaN	0.661312	NaN	-1.71289	-1.46639	NaN	-5.89973	-0.340286	0.290304	-0.364581	0.654884	0.029954	0.153844	S	2	___1	14-3-3 domain binding motif;Akt kinase substrate motif;Calmodulin-dependent protein kinase II substrate motif;G protein-coupled receptor kinase 1 substrate motif;GSK3 kinase substrate motif;MAPKAPK1 kinase substrate motif;PKA kinase substrate motif;PKC kinase substrate motif
NaN	NaN	-0.462696	NaN	0.579843	NaN	NaN	NaN	0.483126	NaN	-0.614981	NaN	NaN	-0.684958	NaN	NaN	-1.15591	NaN	NaN	-0.140394	-1.09671	-0.206571	-0.368278	NaN	NaN	NaN	NaN	NaN	-1.17778	-0.713177	-0.304909	NaN	NaN	NaN	-1.29938	NaN	NaN	NaN	NaN	NaN	-0.585346	-0.415487	-0.713177	0.29769	0.223367	0.11304	S	3	___1	Casein kinase II substrate motif;ERK1,2 kinase substrate motif;Growth associated histone HI kinase substrate motif;GSK-3, ERK1, ERK2, CDK5 substrate motif;Pyruvate dehydrogenase kinase substrate motif;WW domain binding motif
0.447708	1.56901	NaN	0.654344	0.531202	0.431939	-1.35562	0.708207	NaN	0.561877	0.675255	0.542506	NaN	0.51844	0.291252	1.3422	1.24103	2.41089	NaN	1.90881	NaN	1.25356	NaN	NaN	NaN	2.4518	NaN	1.8373	NaN	0.150857	0.0225753	NaN	0.522462	NaN	0.0637142	1.70148	0.446492	NaN	0.339404	NaN	1.1615	0.664799	0.446492	0.218307	0.304386	0.51793	S	3	___1	14-3-3 domain binding motif;b-Adrenergic Receptor kinase substrate motif;Calmodulin-dependent protein kinase II substrate motif;PKA kinase substrate motif;PKC kinase substrate motif;ZIP kinase substrate motif
-2.17921	-1.89904	NaN	NaN	NaN	-0.917516	-0.494646	NaN	-0.241438	-2.03039	-0.924389	-0.875227	NaN	-0.772676	-0.831316	-1.64381	-0.568815	-1.29146	NaN	-1.32873	-0.68984	-1.06669	-0.462339	NaN	NaN	-0.492453	NaN	-0.605672	NaN	-0.531469	-0.757183	-1.90936	-1.33999	-0.919579	-1.186	-0.333661	-1.38354	-0.36828	-1.48117	NaN	-1.07612	-0.896371	-0.997852	0.10148	0.442231	0.806613	S	2	___1	Casein kinase II substrate motif
-1.93214	-1.18999	-0.911299	-0.402643	-0.268496	-0.169245	-0.109253	-1.30657	0.454477	-1.09436	-0.504166	-0.342976	-0.546448	-0.317982	-0.304202	-0.795325	-0.386151	-0.530827	-0.175395	-0.850648	-0.165381	-0.323062	-0.245221	-1.51688	-0.809242	0.251531	NaN	-0.185845	-0.102351	-0.136345	-0.425435	NaN	-0.999032	-0.374148	-1.21346	-0.11274	-0.645436	-0.0418254	-0.974451	-0.0623094	-0.0789534	-0.394397	-0.185845	-0.208551	0.253163	0.355869	S	2	___2	Casein kinase I substrate motif;Casein kinase II substrate motif;MAPKAPK2 kinase substrate motif
-1.18079	-0.764757	-0.911299	-0.117189	-0.0475283	-0.187826	0.142661	-0.247231	0.391248	-0.704492	-0.147854	0.0518049	-0.493692	-0.081864	-0.304202	-0.741021	-0.269679	-0.273708	-0.489568	-0.352997	-0.137004	-0.207721	-0.195713	-0.011557	-0.515126	0.088682	0.616607	0.139208	-0.162127	-0.2265	-0.347976	-0.10607	-0.676906	-0.188708	-1.1274	-0.0904764	-0.211983	-0.198605	-0.272618	-0.0623094	-0.0872866	-0.227476	-0.188708	-0.0387671	0.406443	0.423965	S	2	___2	Casein kinase II substrate motif
-0.356465	-0.284071	-0.0697828	-0.0759454	0.135816	-0.153293	0.305386	-0.205129	0.00988623	-0.342211	-0.0235208	0.113153	-0.0702606	-0.041678	-0.276257	-0.598804	0.104128	-0.118426	-0.489568	-0.00811163	-0.0757546	-0.178711	-0.205275	0.0123297	-0.221068	0.108613	0.616607	0.451611	-0.28598	-0.231036	-0.239174	-0.10607	-0.433741	-0.0168161	-0.178505	-0.0628365	-0.210755	-0.228416	-0.23688	-0.0777268	-0.32029	-0.07585	-0.210755	0.134905	0.401225	0.890151	S	2	___2	Casein kinase II substrate motif;G protein-coupled receptor kinase 1 substrate motif
0.0793046	NaN	0.842818	-0.264977	NaN	0.90179	NaN	0.650221	0.94522	0.539019	0.0778805	0.663309	1.03329	1.12894	NaN	0.294476	0.608087	0.981274	NaN	NaN	0.4815	0.370203	NaN	0.874765	NaN	0.563725	1.50835	NaN	NaN	0.358576	0.7795	0.366288	0.302153	NaN	0.0532383	0.358143	0.429906	0.305453	0.524233	0.52483	0.689839	0.629154	0.398097	0.231057	0.290533	0.559363	S	2	___3	Casein kinase I substrate motif;Casein kinase II substrate motif;MAPKAPK2 kinase substrate motif
0.0793046	NaN	0.842818	-0.264977	NaN	0.90179	NaN	0.650221	0.94522	0.539019	0.229302	0.663309	1.03329	1.12894	NaN	0.294476	0.608087	0.981274	NaN	NaN	0.4815	0.370203	NaN	0.874765	NaN	0.563725	1.50835	NaN	NaN	0.358576	0.7795	0.366288	0.236186	NaN	0.0532383	0.358143	0.429906	0.305453	0.524233	0.52483	0.689839	0.629154	0.398097	0.231057	0.290533	0.492966	S	2	___3	Casein kinase II substrate motif
0.0793046	NaN	0.842818	-0.264977	NaN	0.90179	NaN	0.650221	0.94522	0.539019	0.229302	0.663309	1.03329	1.12894	NaN	0.294476	0.608087	0.981274	NaN	NaN	0.4815	0.370203	NaN	0.874765	NaN	0.563725	1.50835	NaN	NaN	0.358576	0.7795	0.366288	0.236186	NaN	0.0532383	0.358143	0.429906	0.305453	0.524233	0.52483	0.689839	0.629154	0.398097	0.231057	0.290533	0.492966	S	2	___3	Casein kinase II substrate motif;G protein-coupled receptor kinase 1 substrate motif
0.970243	NaN	-0.233956	NaN	NaN	-0.329363	-0.496435	0.289177	NaN	0.081801	-0.55087	NaN	NaN	NaN	0.923008	0.628165	0.156246	0.946831	NaN	NaN	-0.347499	0.708211	-0.537672	NaN	NaN	-0.726733	NaN	NaN	NaN	-0.635844	0.233088	NaN	0.955943	NaN	0.513965	-0.375482	-0.234519	NaN	0.594449	NaN	-0.881344	0.081801	-0.000715606	0.0825166	0.465804	0.785177	S	3	___1	14-3-3 domain binding motif;Calmodulin-dependent protein kinase II substrate motif;Calmodulin-dependent protein kinase IV substrate motif;Chk1 kinase substrate motif;G protein-coupled receptor kinase 1 substrate motif;PAK2 kinase substrate motif;PKA kinase substrate motif;PKC epsilon kinase substrate motif;PKC kinase substrate motif
0.499358	NaN	NaN	1.24548	NaN	NaN	NaN	NaN	NaN	0.216701	2.76798	NaN	NaN	NaN	0.791629	-0.689846	NaN	NaN	NaN	NaN	NaN	1.51646	NaN	NaN	NaN	NaN	NaN	NaN	0.894355	1.00852	-0.256551	NaN	NaN	NaN	NaN	NaN	NaN	NaN	0.289411	NaN	0.750751	0.791629	0.750751	0.0408784	0.485644	0.455546	S	3	___1	Casein kinase II substrate motif;ERK1,2 kinase substrate motif;G protein-coupled receptor kinase 1 substrate motif;Growth associated histone HI kinase substrate motif;GSK3 kinase substrate motif;GSK-3, ERK1, ERK2, CDK5 substrate motif;WW domain binding motif
0.532329	NaN	NaN	-0.0101602	-0.431677	NaN	NaN	-0.210436	-0.0336039	NaN	-0.442167	NaN	NaN	-0.540642	0.776364	NaN	-0.453714	1.17824	NaN	NaN	-0.921175	-0.258504	0.0023936	NaN	NaN	NaN	NaN	NaN	NaN	0.489872	-0.662331	-0.539255	NaN	NaN	NaN	-0.877139	0.465223	0.554384	NaN	NaN	NaN	-0.210436	-0.0370159	-0.17342	0.282295	0.920694	S	2	___2	b-Adrenergic Receptor kinase substrate motif;Casein kinase I substrate motif;Casein kinase II substrate motif;Pyruvate dehydrogenase kinase substrate motif
0.345765	NaN	NaN	-0.0101602	-0.431677	NaN	NaN	-0.210436	-0.0336039	NaN	-0.442167	NaN	NaN	-0.540642	0.776364	NaN	-0.453714	1.17824	NaN	NaN	-0.921175	-0.258504	0.0023936	NaN	NaN	NaN	NaN	NaN	NaN	0.489872	-0.662331	-0.539255	NaN	NaN	NaN	-0.877139	0.465223	0.554384	NaN	NaN	NaN	-0.210436	-0.0370159	-0.17342	0.282295	0.955564	S	2	___2	b-Adrenergic Receptor kinase substrate motif;Casein kinase I substrate motif
1.77357	NaN	NaN	NaN	NaN	NaN	NaN	2.08109	2.39895	1.48498	0.360513	3.2847	NaN	2.70469	1.65722	1.02461	0.69866	2.22158	NaN	2.4876	NaN	NaN	1.62368	3.4772	NaN	2.95395	NaN	1.68849	0.352788	1.45541	2.40256	NaN	2.10778	2.29959	1.83141	NaN	1.63861	1.18326	0.719573	NaN	NaN	2.08109	1.66355	0.417539	0.127797	0.169119	S	2	___1	Casein kinase I substrate motif;PKA kinase substrate motif
-0.393465	0.0241581	0.533445	0.208708	NaN	3.52542	-0.186932	1.30337	0.442542	1.91692	0.0420147	-0.852737	-1.00994	0.0921771	NaN	-0.728055	0.456417	NaN	NaN	-0.551654	0.433158	0.244693	NaN	4.60275	NaN	0.961821	0.312113	0.508285	NaN	-0.948952	0.464214	0.564524	0.842201	0.408309	NaN	0.12241	NaN	0.486511	0.271408	-0.30986	NaN	0.226701	0.408309	-0.181608	0.275363	0.386878	S	2	___1	14-3-3 domain binding motif;Calmodulin-dependent protein kinase II substrate motif;Cdc2 kinase substrate motif;CDK kinase substrate motif;CDK1,2,4,6 kinase substrate motif;ERK1,2 kinase substrate motif;GSK-3, ERK1, ERK2, CDK5 substrate motif;PKA kinase substrate motif;PKC kinase substrate motif;WW domain binding motif;ZIP kinase substrate motif
-0.145238	-0.936618	-0.69737	-0.127295	-0.794439	-1.47619	0.148905	NaN	-0.330043	-0.545763	-0.323127	-1.34231	-1.52408	-0.837102	-0.493058	-1.06931	0.311454	-1.17208	-0.570143	-1.16898	NaN	NaN	NaN	-0.0706252	-0.375994	-0.516181	-0.292183	-0.278925	0.501335	0.408481	-1.43937	0.268931	0.111438	-0.5253	-0.668162	-0.492533	0.158915	-1.04373	0.165302	0.159999	-0.817417	-0.557953	-0.278925	-0.279027	0.199845	0.0446951	S	2	___2	G protein-coupled receptor kinase 1 substrate motif;GSK3 kinase substrate motif
-0.145238	-0.936618	-0.69737	-0.127295	-0.794439	-1.47619	0.148905	NaN	-0.330043	-0.545763	-0.323127	-1.34231	-1.52408	-0.837102	-0.493058	-1.06931	0.311454	-1.17208	-0.570143	-1.16898	NaN	NaN	NaN	-0.0706252	-0.375994	-0.516181	-0.292183	-0.278925	0.501335	0.408481	-1.43937	0.268931	0.111438	-0.5253	-0.668162	-0.492533	0.158915	-1.04373	0.165302	0.159999	-0.817417	-0.557953	-0.278925	-0.279027	0.199845	0.0446951	S	2	___2	Casein kinase II substrate motif;DNA dependent Protein kinase substrate motif;ERK1,2 kinase substrate motif;Growth associated histone HI kinase substrate motif;GSK-3, ERK1, ERK2, CDK5 substrate motif;MAPKAPK2 kinase substrate motif;PKA kinase substrate motif;PKC kinase substrate motif;Pyruvate dehydrogenase kinase substrate motif;WW domain binding motif
-1.07386	-1.24861	-0.641962	0.130972	-0.475721	-0.452748	-0.780184	NaN	0.900163	NaN	-1.50682	NaN	-1.29722	NaN	NaN	NaN	NaN	NaN	-0.85041	NaN	-1.03203	-1.19671	NaN	-1.14951	NaN	NaN	NaN	NaN	NaN	-0.584249	-1.13952	NaN	NaN	-1.26134	-1.15555	-2.11939	-1.60476	-0.984633	NaN	NaN	-0.563744	-0.941222	-1.14754	0.206315	0.317676	0.11487	T	3	___1	Growth associated histone HI kinase substrate motif;GSK-3, ERK1, ERK2, CDK5 substrate motif;PKA kinase substrate motif;PKC kinase substrate motif;WW domain binding motif
NaN	-1.34314	NaN	0.282171	-0.635	NaN	-0.891148	NaN	NaN	0.212064	-1.80333	-1.84762	NaN	NaN	NaN	-1.26408	-0.660957	-1.24432	NaN	-2.43212	-1.7035	-1.91894	NaN	-2.15727	NaN	NaN	NaN	NaN	NaN	-1.45028	-1.46962	NaN	-1.64285	-1.80996	-1.32844	NaN	NaN	-0.922918	-1.90503	NaN	-1.48662	-1.30361	-1.47812	0.174514	0.354039	0.306472	S	3	___2	Casein kinase II substrate motif;DNA dependent Protein kinase substrate motif;ERK1,2 kinase substrate motif;GSK-3, ERK1, ERK2, CDK5 substrate motif;PKA kinase substrate motif;PKC kinase substrate motif;WW domain binding motif
NaN	-1.34314	NaN	-0.300378	-0.635	-1.2467	-0.891148	NaN	NaN	0.212064	-1.80333	-1.84762	NaN	NaN	NaN	-1.19354	-0.79367	-1.24432	NaN	-2.43656	-1.7035	-1.73758	NaN	-2.15727	NaN	NaN	NaN	NaN	NaN	-1.45426	-1.29635	NaN	-1.52846	-1.70055	-1.33812	NaN	NaN	-1.52619	-1.90503	NaN	-1.48662	-1.2467	-1.5064	0.2597	0.260538	0.211605	S	4	___2	ERK1, ERK2, SAPK, CDK5 and GSK3 kinase substrate motif;ERK1,2 kinase substrate motif;Growth associated histone HI kinase substrate motif;GSK-3, ERK1, ERK2, CDK5 substrate motif;MAPKAPK2 kinase substrate motif;WW domain binding motif
-1.56912	-1.74798	NaN	-0.852411	-0.846555	-0.936432	-1.00925	-1.28594	-0.789803	-1.98155	-1.82426	-1.83837	NaN	-1.0438	-2.3884	-0.923514	-0.771778	-1.07994	-1.62309	-2.65289	-1.23633	-1.73216	-1.89069	NaN	NaN	-1.57391	-2.07593	NaN	-1.74923	-1.59848	-1.0432	-1.80074	-2.34483	-1.89543	-1.34465	NaN	-1.83152	-1.82345	-1.5654	NaN	-1.45424	-1.42753	-1.77499	0.347453	0.179575	0.0790896	S	2	___2	14-3-3 domain binding motif;Akt kinase substrate motif;Calmodulin-dependent protein kinase II substrate motif;Casein kinase II substrate motif;MAPKAPK1 kinase substrate motif;PKA kinase substrate motif;PKC kinase substrate motif
-1.56912	-1.74798	NaN	-0.852411	-0.846555	-0.936432	-1.00925	-1.28594	-0.789803	-1.98155	-1.82426	-1.83837	NaN	-1.0438	-2.3884	-0.923514	-0.771778	-1.07994	-1.62309	-2.65289	-1.23633	-1.73216	-1.89069	NaN	NaN	-1.57391	-2.07593	NaN	-1.74923	-1.59848	-1.0432	-1.80074	-2.34483	-1.89543	-1.34465	NaN	-1.83152	-1.82345	-1.5654	NaN	-1.45424	-1.42753	-1.77499	0.347453	0.179575	0.0790896	S	2	___2	G protein-coupled receptor kinase 1 substrate motif
-2.90205	NaN	NaN	NaN	-0.841197	NaN	-1.74806	NaN	NaN	NaN	NaN	NaN	NaN	-1.27451	-3.91309	NaN	-2.45141	-2.32508	NaN	-1.91889	-2.28729	-2.67954	NaN	NaN	NaN	-1.72444	NaN	NaN	NaN	-3.52618	-1.52951	NaN	-3.63679	-3.06854	-2.74161	NaN	-4.52509	-3.59193	-2.94351	NaN	NaN	-2.28729	-3.29736	1.01007	0.00136877	0.0228904	S	2	___1	Casein kinase II substrate motif;Cdc2 kinase substrate motif;CDK kinase substrate motif;CDK1,2,4,6 kinase substrate motif;ERK1,2 kinase substrate motif;G protein-coupled receptor kinase 1 substrate motif;GSK-3, ERK1, ERK2, CDK5 substrate motif;WW domain binding motif
NaN	NaN	NaN	-2.46845	NaN	-1.06573	-1.06877	-0.843208	-1.66062	-2.14297	-2.41544	-2.02716	NaN	-0.872005	NaN	-2.16847	-1.36741	-1.51277	NaN	-1.04607	-1.37389	-1.8186	-2.09936	NaN	NaN	NaN	NaN	-2.05727	-2.80323	-2.04381	-0.810333	NaN	-2.28111	-1.94964	-1.6684	NaN	NaN	-2.57364	-1.92851	NaN	-2.04033	-1.58669	-2.04207	0.455379	0.104635	0.0875495	S	3	___1	Casein kinase I substrate motif;Casein kinase II substrate motif;ERK1,2 kinase substrate motif;GSK-3, ERK1, ERK2, CDK5 substrate motif;WW domain binding motif
-0.724166	-0.686972	-0.838372	-0.880665	-0.217867	-0.831544	-0.802841	-0.200414	-0.577604	-1.39506	-1.54357	-0.643713	-0.934421	-0.207005	-1.78369	-0.882809	-0.928182	-0.582863	NaN	-0.421418	-0.577834	-0.939711	-1.16396	-0.94064	NaN	-0.5216	-1.41061	-1.45765	-1.93476	-1.68901	-0.353019	-0.630581	-1.81022	-1.06688	-0.511801	-1.13769	-2.18141	-1.64328	-1.14235	-2.34264	-1.1665	-0.817193	-1.41061	0.593414	0.0456457	0.00344372	S	3	___1	14-3-3 domain binding motif;AMP-activated protein kinase substrate motif;b-Adrenergic Receptor kinase substrate motif;Calmodulin-dependent protein kinase II substrate motif;Casein kinase II substrate motif;ERK1,2 kinase substrate motif;GSK-3, ERK1, ERK2, CDK5 substrate motif;HMGCoA Reductase kinase substrate motif;PKA kinase substrate motif;PKC kinase substrate motif;WW domain binding motif
-1.5252	-0.752261	-1.18978	-1.46458	-0.283723	-0.837157	-0.850239	-0.655869	-0.932932	-2.39129	-1.76835	-1.05469	-0.931678	-0.203459	-2.39249	-1.30185	-1.00031	-1.0016	NaN	-1.02608	-0.756553	-1.22179	NaN	-1.16874	NaN	-0.927982	-0.625197	-1.67066	-2.75019	-2.31282	-0.650414	NaN	-1.95498	-1.78413	-0.804107	-1.57593	-2.70007	-2.45414	-1.94613	-2.5237	-1.46744	-1.0016	-1.86513	0.863533	0.00560557	0.00569366	S	3	___1	Cdc2 kinase substrate motif;CDK kinase substrate motif;CDK1,2,4,6 kinase substrate motif;ERK1,2 kinase substrate motif;GSK-3, ERK1, ERK2, CDK5 substrate motif;WW domain binding motif
-1.2105	-0.776495	-1.06586	-1.01668	0.232512	-0.391269	NaN	-0.248265	-0.780004	-1.85102	-1.20607	-0.918397	NaN	-0.0182251	-1.8262	-1.25946	-0.54691	-0.562059	-1.34628	-0.897763	-0.275792	-0.88083	-0.212735	-0.707673	NaN	0.545167	NaN	-0.457853	-2.08894	-1.65954	-0.0438362	-1.20823	-2.14065	-1.53897	-0.622525	NaN	-2.35238	-2.04376	-1.18334	NaN	-0.97577	-0.780004	-1.3736	0.593597	0.0455909	0.0231011	S	3	___1	b-Adrenergic Receptor kinase substrate motif;ERK1,2 kinase substrate motif;Growth associated histone HI kinase substrate motif;GSK-3, ERK1, ERK2, CDK5 substrate motif;PKA kinase substrate motif;PKC kinase substrate motif;WW domain binding motif
NaN	-1.77142	-2.9738	-2.00793	-1.17898	NaN	NaN	-2.41443	-2.05214	-1.28024	-1.8406	0.110697	-1.85688	-0.861705	0.110395	0.330888	-2.69508	-2.23186	-1.69801	-2.59365	-0.90288	-1.91332	-2.03701	-2.23747	NaN	-2.61794	-3.05915	-2.80356	-3.57799	-3.56445	-1.51926	-1.45054	0.372234	-1.8098	-0.867829	-1.94825	-3.21205	-2.98383	-2.94019	-3.73009	-2.53237	-1.8851	-2.80356	0.918465	0.0033806	0.0579311	S	3	___2	Casein kinase II substrate motif;ERK1,2 kinase substrate motif;G protein-coupled receptor kinase 1 substrate motif;GSK-3, ERK1, ERK2, CDK5 substrate motif;PKA kinase substrate motif;PKC kinase substrate motif;WW domain binding motif
-1.58351	-1.77142	-2.9738	NaN	-1.17898	NaN	NaN	-2.41443	-2.05214	NaN	-1.8406	0.110697	-1.85688	-0.861705	NaN	0.330888	-2.69508	-2.23186	NaN	NaN	-0.90288	-1.91332	-2.03701	-2.23747	NaN	-2.61794	-3.05915	-2.80356	-3.57799	-3.56445	-1.51926	-1.45054	0.372234	NaN	-0.867829	-1.94825	-3.21205	-2.98383	NaN	NaN	-2.53237	-1.8851	-2.66796	0.782867	0.0112158	0.190132	S	3	___2	ERK1,2 kinase substrate motif;Growth associated histone HI kinase substrate motif;GSK-3, ERK1, ERK2, CDK5 substrate motif;PKA kinase substrate motif;PKC kinase substrate motif;WW domain binding motif
0.439596	0.52783	NaN	0.129552	-0.181286	0.737615	-0.767245	0.77805	-0.0363552	-0.395646	-1.48724	0.6772	0.0403882	1.17806	-1.33864	0.315439	-0.0511796	0.226426	0.204293	0.250919	0.532325	-1.20641	-0.793582	NaN	NaN	NaN	NaN	-1.34582	-1.84558	-1.88459	0.867348	0.132083	-0.530592	0.280571	1.05335	0.226198	NaN	-1.59839	-0.978689	NaN	-0.792489	0.166923	-0.661541	0.828463	0.00763258	0.136573	S	3	___2	14-3-3 domain binding motif;AMP-activated protein kinase substrate motif;b-Adrenergic Receptor kinase substrate motif;Calmodulin-dependent protein kinase II substrate motif;Casein kinase II substrate motif;ERK1,2 kinase substrate motif;GSK-3, ERK1, ERK2, CDK5 substrate motif;HMGCoA Reductase kinase substrate motif;PKA kinase substrate motif;PKC kinase substrate motif;WW domain binding motif
0.439596	0.52783	NaN	0.129552	-0.181286	0.737615	-0.767245	0.77805	-0.0363552	-0.395646	-1.48724	0.6772	0.0403882	1.17806	-1.33864	0.315439	-0.0511796	0.226426	0.204293	0.250919	0.532325	-1.20641	-0.793582	NaN	NaN	NaN	NaN	-1.34582	-1.84558	-1.88459	0.867348	0.132083	-0.530592	0.280571	1.05335	0.226198	NaN	-1.59839	-0.978689	NaN	-0.792489	0.166923	-0.661541	0.828463	0.00763258	0.136573	S	3	___2	b-Adrenergic Receptor kinase substrate motif;Casein kinase II substrate motif
NaN	NaN	NaN	-4.82845	-1.03142	NaN	-2.88916	-2.75443	NaN	NaN	-3.96926	-4.10153	NaN	NaN	NaN	-4.30641	NaN	-2.75345	NaN	-3.02038	NaN	NaN	NaN	NaN	NaN	NaN	NaN	-1.07762	-1.16657	-4.23103	NaN	NaN	NaN	-3.69496	-2.51917	-4.12642	NaN	-3.89639	NaN	NaN	-2.09275	-3.02038	-3.10706	0.0866876	0.460606	0.47068	S	3	___2	b-Adrenergic Receptor kinase substrate motif;ERK1,2 kinase substrate motif;GSK-3, ERK1, ERK2, CDK5 substrate motif;WW domain binding motif
NaN	NaN	NaN	-4.82845	-1.03142	NaN	-2.88916	-2.75443	NaN	NaN	-3.96926	-4.10153	NaN	NaN	NaN	-4.30641	NaN	-2.75345	NaN	-3.02038	NaN	NaN	NaN	NaN	NaN	NaN	NaN	-1.07762	-1.16657	-4.23103	NaN	NaN	NaN	-3.69496	-2.51917	-4.12642	NaN	-3.89639	NaN	NaN	-2.09275	-3.02038	-3.10706	0.0866876	0.460606	0.47068	S	3	___2	Cdc2 kinase substrate motif;CDK kinase substrate motif;CDK1,2,4,6 kinase substrate motif;ERK1,2 kinase substrate motif;GSK-3, ERK1, ERK2, CDK5 substrate motif;WW domain binding motif
-2.63871	-2.65013	NaN	-3.34216	-0.776133	-1.52089	-1.87111	-1.53168	NaN	-3.62831	-2.68202	-2.98981	-2.64986	-1.48221	-3.69242	-3.76	-1.82271	-2.90454	NaN	-2.09388	-2.11395	-2.43126	-2.75005	NaN	NaN	NaN	NaN	-2.74973	-3.70223	-3.40423	-1.61841	-1.79993	-3.23921	-3.23953	-2.82824	-2.4888	-3.00479	-3.1084	-2.64762	NaN	-2.85008	-2.64428	-2.85008	0.205801	0.318251	0.158167	S	3	___2	b-Adrenergic Receptor kinase substrate motif;Cdc2 kinase substrate motif;CDK kinase substrate motif;CDK1,2,4,6 kinase substrate motif;ERK1,2 kinase substrate motif;GSK-3, ERK1, ERK2, CDK5 substrate motif;WW domain binding motif
NaN	-2.65013	NaN	-3.34216	-1.00479	NaN	-1.87111	NaN	NaN	-3.62831	-2.03981	-2.98981	-2.64986	-1.48221	NaN	NaN	NaN	NaN	NaN	NaN	NaN	-2.57866	-2.83758	NaN	NaN	NaN	NaN	-2.74973	-3.70223	-3.64789	-1.62793	-1.79993	-3.23921	-3.23953	NaN	NaN	-2.35831	-3.27232	NaN	NaN	NaN	-2.64986	-3.23921	0.589355	0.0468799	0.2826	S	2	___2	Casein kinase II substrate motif;ERK1,2 kinase substrate motif;G protein-coupled receptor kinase 1 substrate motif;GSK-3, ERK1, ERK2, CDK5 substrate motif;WW domain binding motif
-2.63871	NaN	NaN	NaN	-0.547442	-1.82403	NaN	-1.53168	NaN	NaN	NaN	NaN	NaN	NaN	-3.69242	-3.76	-1.82271	-2.90454	NaN	-2.09388	-2.11395	-1.72669	-2.66253	NaN	NaN	NaN	NaN	NaN	NaN	-3.16063	-1.58841	NaN	NaN	NaN	-2.82824	-2.4888	-3.65126	-2.94452	-2.43155	NaN	-2.85008	-2.10392	-2.83916	0.735245	0.0164386	0.186414	S	3	___2	b-Adrenergic Receptor kinase substrate motif;ERK1,2 kinase substrate motif;Growth associated histone HI kinase substrate motif;GSK-3, ERK1, ERK2, CDK5 substrate motif;PKA kinase substrate motif;PKC kinase substrate motif;WW domain binding motif
-1.58351	-1.77142	-2.9738	-2.00793	-1.17898	NaN	NaN	-2.41443	-2.05214	-1.28024	-1.8406	0.110697	NaN	NaN	0.110395	0.330888	NaN	NaN	-1.69801	-2.59365	NaN	-1.91332	NaN	NaN	NaN	-2.61794	NaN	-2.80356	NaN	-3.56445	-1.51926	-1.45054	NaN	-1.8098	-0.867829	-1.94825	-3.21205	-2.98383	-2.94019	-3.73009	-2.53237	-1.80601	-2.66796	0.861953	0.0056854	0.0257505	T	3	___2	G protein-coupled receptor kinase 1 substrate motif
NaN	NaN	-4.10075	-3.54657	-1.50742	-2.67719	NaN	-2.67584	-3.00578	-4.41808	-3.68564	-4.12257	-2.65979	-1.92646	-4.43661	-4.1836	-3.23863	-3.39581	-2.18568	-3.56962	-2.69703	-3.29603	-3.51685	-3.97731	NaN	-2.40923	NaN	-3.87904	-4.85444	-4.00619	-2.26611	-2.37565	-2.91	-3.0075	-3.2331	-3.97712	-4.31951	-3.91983	-3.64726	-4.84175	-3.67095	-3.34592	-3.775	0.42908	0.120384	0.160527	S	2	___3	Casein kinase II substrate motif;Cdc2 kinase substrate motif;CDK kinase substrate motif;CDK1,2,4,6 kinase substrate motif;ERK1,2 kinase substrate motif;G protein-coupled receptor kinase 1 substrate motif;GSK-3, ERK1, ERK2, CDK5 substrate motif;WW domain binding motif
NaN	NaN	NaN	-3.54657	-1.50742	-2.67719	NaN	-2.67584	-3.00578	-4.41808	-3.68564	-4.12257	-2.65979	-1.92646	-4.43661	-4.1836	-3.23863	-3.39581	-2.18568	-3.56962	-2.69703	-3.29603	-3.51685	NaN	NaN	-2.40923	NaN	-3.87904	-4.85444	-4.00619	NaN	-2.37565	-2.91	-3.0075	-3.2331	-3.97712	-4.31951	-3.91983	-3.64726	-4.84175	NaN	-3.26733	-3.89943	0.632105	0.0351474	0.0492136	S	3	___3	Casein kinase II substrate motif;ERK1,2 kinase substrate motif;G protein-coupled receptor kinase 1 substrate motif;GSK-3, ERK1, ERK2, CDK5 substrate motif;PKA kinase substrate motif;PKC kinase substrate motif;WW domain binding motif
NaN	NaN	-4.10075	NaN	-1.50742	NaN	NaN	-2.67584	NaN	-4.41808	NaN	-4.12257	-2.65979	-1.92646	-4.43661	-4.1836	-3.23863	-3.39581	-2.18568	-3.56962	-2.69703	-3.29603	NaN	-3.97731	NaN	-2.40923	NaN	-3.87904	NaN	-4.00619	-2.26611	-2.37565	-2.91	-3.0075	NaN	-3.97712	NaN	-3.91983	-3.64726	-4.84175	-3.67095	-3.29603	-3.67095	0.374926	0.157888	0.399707	S	3	___3	ERK1,2 kinase substrate motif;Growth associated histone HI kinase substrate motif;GSK-3, ERK1, ERK2, CDK5 substrate motif;PKA kinase substrate motif;PKC kinase substrate motif;WW domain binding motif
NaN	NaN	-4.10075	-3.54657	-1.50742	-2.67719	NaN	NaN	-3.00578	-4.41808	-3.68564	NaN	NaN	-1.92646	-4.43661	-4.1836	-3.23863	-3.39581	-2.18568	-3.56962	-2.69703	-3.29603	-3.51685	-3.97731	NaN	NaN	NaN	-3.87904	-4.85444	-4.00619	-2.26611	-2.37565	NaN	-3.0075	-3.2331	-3.97712	-4.31951	NaN	-3.64726	-4.84175	-3.67095	-3.45633	-3.775	0.31867	0.204207	0.241557	T	3	___3	G protein-coupled receptor kinase 1 substrate motif
NaN	NaN	1.56384	NaN	NaN	NaN	NaN	NaN	0.393137	1.53605	NaN	1.55824	NaN	NaN	1.73942	1.74766	1.97775	NaN	NaN	NaN	NaN	1.17042	NaN	0.50209	NaN	1.39667	NaN	NaN	2.13627	1.4484	2.58877	1.29256	2.25621	NaN	NaN	NaN	NaN	1.60644	1.26488	NaN	1.52755	1.54714	1.56699	-0.0198504	0.425034	0.112229	S	2	___1	14-3-3 domain binding motif;Akt kinase substrate motif;Calmodulin-dependent protein kinase II substrate motif;Casein kinase II substrate motif;G protein-coupled receptor kinase 1 substrate motif;MAPKAPK1 kinase substrate motif;p70 Ribosomal S6 kinase substrate motif;Phosphorylase kinase substrate motif;PKA kinase substrate motif;PKC kinase substrate motif
0.596452	NaN	0.15047	-0.941531	NaN	NaN	1.10895	NaN	-0.0953564	1.25175	-0.818005	0.499912	NaN	-1.17253	NaN	0.323023	1.67742	NaN	NaN	0.572143	-0.164144	NaN	0.321218	-0.22917	NaN	-0.14376	-0.411408	NaN	NaN	1.02704	1.09809	0.213917	1.9996	1.72487	NaN	-0.0728935	1.72379	1.01895	1.16035	1.20324	1.29498	0.235844	1.12922	-0.893374	0.00841575	0.00949354	S	3	___1	14-3-3 domain binding motif;AMP-activated protein kinase substrate motif;Calmodulin-dependent protein kinase I substrate motif;Calmodulin-dependent protein kinase II substrate motif;Calmodulin-dependent protein kinase IV substrate motif;Chk1 kinase substrate motif;PKA kinase substrate motif;PKC kinase substrate motif;ZIP kinase substrate motif
[truncated: 4,924 more rows]
[truncated: 20 more columns]

## Sheet: 274 significant p-sites
P-value	FC significance	FC RELAPSE/REL_FREE	Amino acid	Position	Gene names	Phosphosite
0.00877016	4.21885e-15	2.52877	S	205	BCL11A	BCL11A_S205		Phosphosite which the corresponding protein FC was not determined
0.0310161	1.89754e-09	1.93353	S	637	SATB1	SATB1_S637		Phosphosite which the corresponding protein FC was not differentially significant
[truncated: 272 more rows]
