# Supplementary material for: Proteome and Phosphoproteome Changes Associated with Prognosis in Acute Myeloid Leukemia
Source: Cancers (Basel). 2020 Mar 17;12(3):709. doi: 10.3390/cancers12030709 (PMC7140113; doi:10.3390/cancers12030709)
Supplement: Supplementary file 1 [file cancers-12-00709-s001.zip › Supplementary file 4 - Kinase substrates.xlsx]

## Sheet: Details
Potential kinase substrates in the dataset of 274 differentially phosphorylated sites obtained from the analysis of the 15 REL_FREE vs 26 RELAPSE patient cohort
Datasheet CSK2 substrate motif contains phosphosites that might be phosphorylated by CSK2 (SxxE, SxxD, TxxE, TxxD motifs)
Datasheet CDK substrate motif contains phosphosites that might be phosphorylated by CDKs (SPxR, SPxK, TPxR, TPxK motifs)
Datasheet PRKCA PRKCD substrate motif contains phosphosites that might be phosphorylated by PRKCA (KxxS, KxxT motifs) and PRKCD (RxxS, KxxS, RxxT, KxxT motifs)

## Sheet: CSK2 substrate motif
p-value	FC RELAPSE/REL-FREE	FC significance	Amino acid	Position	Protein	Protein names	Gene names	Sequence window*				*The 31 aminoacids sequence windows are displayed
0.0310161	1.93353	1.89754e-09	S	637	Q01826	DNA-binding protein SATB1	SATB1	PRLPPRQPTVASPAE	SDEE	NRQKTRPRTKIS		discontinously in order to show the potential CSK2 substrate motifs
0.0351048	1.83196	1.24311e-08	S	1044	Q9P266	Junctional protein associated with coronary artery disease	KIAA1462	GAGLPLSLSNKNRGL	SAPD	LRSVGLTPGQEQ		in red (phosphosite is located at the 16th position)
0.000682192	1.76917	3.78202e-08	S	608	Q9H165	B-cell lymphoma/leukemia 11A	BCL11A	ESDRIDDGTVNGRGC	SPGE	SASGGLSKKLLL
0.0122728	1.5888	7.49456e-07	S	134	P12980	Protein lyl-1	LYL1	GPFSIFPSSRLKRRP	SHCE	LDLAEGHQPQKV
0.000355986	1.48966	3.39207e-06	S	472	Q76N32-2	Centrosomal protein of 68 kDa	CEP68	SQSARRPTCTESRWK	SEEE	VESDDEYLALPA
0.000355986	1.48966	3.39207e-06	S	478	Q76N32-2	Centrosomal protein of 68 kDa	CEP68	PTCTESRWKSEEEVE	SDDE	YLALPARLTQTF
0.0248762	1.20853	0.000148223	S	125	P06748	Nucleophosmin	NPM1	HISGQHLVAVEEDAE	SEDE	EEEDVKLLSISG
0.0444188	1.13486	0.000352961	S	293	P08559	Pyruvate dehydrogenase E1 component subunit alpha, somatic form, mitochondrial;Pyruvate dehydrogenase E1 component subunit alpha, testis-specific form, mitochondrial	PDHA1;PDHA2	GPILMELQTYRYHGH	SMSD	PGVSYRTREEIQ
0.0488431	1.06836	0.000739811	S	1017	Q5T200	Zinc finger CCCH domain-containing protein 13	ZC3H13	SIEKKRKKSKGDSDI	SDEE	AAQQSKKKRGPR
0.0230176	1.04356	0.000964834	S	782	Q8TDD1	ATP-dependent RNA helicase DDX54	DDX54	LYQKWKQKQKIDDRD	SDEE	GASDRRGPERRG
0.031744	0.968604	0.00208058	S	251	Q9BUA3	Uncharacterized protein C11orf84	C11orf84	MTKNLDPDPEPPSPD	SPTE	TFAAPAEVRHFT
0.00366371	0.964851	0.00215927	S	337	P12694	2-oxoisovalerate dehydrogenase subunit alpha, mitochondrial	BCKDHA	QPFLIEAMTYRIGHH	STSD	DSSAYRSVDEVN
0.0307261	0.945538	0.00260852	S	485	Q14676	Mediator of DNA damage checkpoint protein 1	MDC1	VLKDHTKIRALVRAH	SEKD	QPPFGDSDDSVE
0.00606328	0.94461	0.0026321	S	368	Q9NQZ2	Something about silencing protein 10	UTP3	KTSAAACAVTDLSDD	SDFD	EKAKLKYYKEIE
0.0238095	0.932072	0.00297005	S	238	Q9NQ55-2	Suppressor of SWI4 1 homolog	PPAN	RLQDISELLATGAGL	SESE	AEPDGDHNITEL
0.0103078	0.932072	0.00297005	S	240	Q9NQ55-2	Suppressor of SWI4 1 homolog	PPAN	QDISELLATGAGLSE	SEAE	PDGDHNITELPQ
0.0072576	0.918918	0.00336614	S	556	Q9NPH3	Interleukin-1 receptor accessory protein	IL1RAP	QLQVAMPVKKSPRRS	SSDE	QGLSYSSLKNV_
0.0405155	0.918057	0.00339366	S	173	O75367-2	Core histone macro-H2A.1	H2AFY	KSKKQGEVSKAASAD	STTE	GTPADGFTVLST
0.00899018	0.915712	0.00346962	S	335	Q8IY81	pre-rRNA processing protein FTSJ3	FTSJ3	AKKLKEQAKALDISL	SSGE	EDEGDEEDSTAG
0.00802935	0.915712	0.00346962	S	336	Q8IY81	pre-rRNA processing protein FTSJ3	FTSJ3	KKLKEQAKALDISLS	SGEE	DEGDEEDSTAGT
0.0313267	0.89892	0.00405969	T	18	P41212	Transcription factor ETV6	ETV6	ETPAQCSIKQERISY	TPPE	SPVPSYASSTPL
0.0339272	0.865446	0.00551023	S	1620	Q9C0C2	182 kDa tankyrase-1-binding protein	TNKS1BP1	HLFQDSTEPRASRVP	SSDE	EVVEEPQSRRTR
0.0339272	0.865446	0.00551023	S	1621	Q9C0C2	182 kDa tankyrase-1-binding protein	TNKS1BP1	LFQDSTEPRASRVPS	SDEE	VVEEPQSRRTRM
0.0491022	0.827875	0.00767145	S	66	P18858	DNA ligase 1	LIG1	SPVKRPGRKAARVLG	SEGE	EEDEALSPAKGQ
0.0443513	0.816118	0.00848638	S	7	P05114	Non-histone chromosomal protein HMG-14	HMGN1	_________MPKRKV	SSAE	GAAKEEPKRRSA
0.0422279	0.81016	0.00892766	S	504	P29590	Protein PML	PML	IKMESEEGKEARLAR	SSPE	QPRPSTSKAVSP
0.016622	0.807141	0.00915885	S	14	P42696	RNA-binding protein 34	RBM34	__MALEGMSKRKRKR	SVQE	GENPDDGVRGSP
0.0018257	0.791307	0.0104591	S	49	P17026	Zinc finger protein 22	ZNF22	GMTIRFDSSFSRLRR	SLDD	KPYKCTECEKSF
0.014525	0.77211	0.0122488	S	687	P49790	Nuclear pore complex protein Nup153	NUP153	KVTDNKCIACQAAKL	SPRD	TAKQTGIETPNK
0.0249986	0.767836	0.0126816	S	398	Q8N1F8	Serine/threonine-protein kinase 11-interacting protein	STK11IP	PLLHKVKSRVRVRRA	SISE	PSDTDPEPRTLN
0.0249986	0.767836	0.0126816	S	403	Q8N1F8	Serine/threonine-protein kinase 11-interacting protein	STK11IP	VKSRVRVRRASISEP	SDTD	PEPRTLNPSPAG
0.0271089	0.754702	0.0140954	S	177	Q6JBY9	CapZ-interacting protein	RCSD1	RGSIKRRPPSRRFRR	SQSD	CGELGDFRAVES
0.044489	0.753058	0.0142816	S	762	P36888	Receptor-type tyrosine-protein kinase FLT3	FLT3	PDSDQISGLHGNSFH	SEDE	IEYENQKRLEEE
0.00496901	0.752479	0.0143477	S	171	Q9NR30	Nucleolar RNA helicase 2	DDX21	HPEPDCNPSEAASEE	SNSE	IEQEIPVEQKEG
0.00496901	0.752479	0.0143477	S	173	Q9NR30	Nucleolar RNA helicase 2	DDX21	EPDCNPSEAASEESN	SEIE	QEIPVEQKEGAF
0.0205713	0.739012	0.0159605	S	405	Q9BVJ6	U3 small nucleolar RNA-associated protein 14 homolog A	UTP14A	QEDPEQLPELEAHGV	SESE	GEERPVAEEEIL
0.0205713	0.739012	0.0159605	S	407	Q9BVJ6	U3 small nucleolar RNA-associated protein 14 homolog A	UTP14A	DPEQLPELEAHGVSE	SEGE	ERPVAEEEILLR
0.00313359	0.737476	0.0161541	S	2367	Q5UIP0-2	Telomere-associated protein RIF1	RIF1	DISEKTVNGIENKSL	SPDE	ERLVSDIIDPVA
0.0379697	0.722336	0.0181709	S	672	Q9Y3T9	Nucleolar complex protein 2 homolog	NOC2L	KDEDRKQFKDLFDLN	SSEE	DDTEGFSERGIL
0.0379697	0.722336	0.0181709	S	673	Q9Y3T9	Nucleolar complex protein 2 homolog	NOC2L	DEDRKQFKDLFDLNS	SEED	DTEGFSERGILR
0.0145028	0.719968	0.0185051	S	1219	Q12888	Tumor suppressor p53-binding protein 1	TP53BP1	EKPVSAPGDDTESLH	SQGE	EEFDMPQPPHGH
0.049366	0.708304	0.0202282	S	904	Q92974-3	Rho guanine nucleotide exchange factor 2	ARHGEF2	SVHRNFEDRERQELG	SPEE	RLQDSSDPDTGS
0.0148101	0.690761	0.0230748	S	502	Q9Y2X3	Nucleolar protein 58	NOP58	KKKRGKKKHIKEEPL	SEEE	PCTSTAIASPEK
0.0200009	0.66605	0.0276507	S	215	Q96T37-4	Putative RNA-binding protein 15	RBM15	PLKIEAVYVSRRRSR	SPLD	KDTYPPSASVVG
0.0157115	0.649135	0.0312007	S	40	P29590	Protein PML	PML	PPETPSEGRQPSPSP	SPTE	RAPASEEEFQFL
0.0463443	0.631668	0.0352539	S	211	O95210	Starch-binding domain-containing protein 1	STBD1	DRVDHEEWEMVPRHS	SWGD	VGVGGSLKAPVL
0.0329817	0.624378	0.0370686	S	320	Q86VR2	Protein FAM134C	FAM134C	GQTPLTEGSEDLDGH	SDPE	ESFARDLPDFPS
0.0127236	0.603164	0.042788	S	359	Q9NQ55-2	Suppressor of SWI4 1 homolog	PPAN	RKKSLEGMKKARVGG	SDEE	ASGIPSRTASLE
0.0402856	0.591734	0.0461535	S	129	Q8WXI9	Transcriptional repressor p66-beta	GATAD2B	PERGRLTPSPDIIVL	SDNE	ASSPRSSSRMEE
0.00318808	-0.628119	0.042543	S	61	Q6PJF5-2	Inactive rhomboid protein 2	RHBDF2	SMLPERKNPAYLKSV	SLQE	PRSRWQESSEKR
0.0272759	-0.631298	0.0418223	S	5841	Q09666	Neuroblast differentiation-associated protein AHNAK	AHNAK	GGLGSKSKGHYEVTG	SDDE	TGKLQGSGVSLA
0.0370888	-0.641233	0.0396333	S	1210	Q04637-8	Eukaryotic translation initiation factor 4 gamma 1	EIF4G1	SRERPSQPEGLRKAA	SLTE	DRDRGRDAVKRE
0.0128239	-0.684775	0.0311128	S	663	Q641Q2	WASH complex subunit FAM21A	FAM21A	SGTLQSQEAKAVKKT	SLFE	EDEEDDLFAIAK
0.0231771	-0.695222	0.0293113	S	206	Q7Z7N9	Transmembrane protein 179B	TMEM179B	ATPYRPLERGDPEWS	SETD	ALVGSRLSHS__
9.66878e-05	-0.701171	0.0283248	S	152	Q9H6H4	Receptor expression-enhancing protein 4	REEP4	ATKSQGALAGRLRSF	SMQD	LRSISDAPAPAY
0.00658514	-0.705289	0.0276582	S	658	O14617-5	AP-3 complex subunit delta-1	AP3D1	AVFHEEEQRRPKHRP	SEAD	EEELARRREARK
0.000611223	-0.712207	0.0265679	S	511	Q96B97	SH3 domain-containing kinase-binding protein 1	SH3KBP1	LTSSSLSSPDIFDSP	SPEE	DKEEHISLAHRG
0.0124616	-0.730015	0.0239252	S	114	Q12982	BCL2/adenovirus E1B 19 kDa protein-interacting protein 2	BNIP2	DDLPKPKTTEVIRKG	SITE	YTAAEEKEDGRR
0.0112477	-0.7303	0.0238848	S	100	Q96SB3	Neurabin-2	PPP1R9B	RASERGVRLSLPRAS	SLNE	NVDHSALLKLGT
0.0298607	-0.751596	0.0210222	S	27	Q15435	Protein phosphatase 1 regulatory subunit 7	PPP1R7	SQEMMEVDRRVESEE	SGDE	EGKKHSSGIVAD
0.016158	-0.769755	0.018816	S	109	Q8NE71	ATP-binding cassette sub-family F member 1	ABCF1	EKELMERLKKLSVPT	SDEE	DEVPAPKPRGGK
0.016158	-0.769755	0.018816	T	108	Q8NE71	ATP-binding cassette sub-family F member 1	ABCF1	EEKELMERLKKLSVP	TSDE	EDEVPAPKPRGG
0.0366724	-0.776317	0.0180687	S	450	Q14699	Raftlin	RFTN1	PQKIKKKESKFQWRF	SREE	MHNRQMRKSKGK
0.00964308	-0.805041	0.0150883	S	142	Q86Y82	Syntaxin-12	STX12	KEKESIARARAGSRL	SAEE	RQREEQLVSFDS
0.00498854	-0.818828	0.0138147	S	3808	Q7Z6Z7	E3 ubiquitin-protein ligase HUWE1	HUWE1	TSESSQSEASVRREE	SPMD	VDQPSPSAQDTQ
0.00969992	-0.843628	0.0117561	S	202	Q6WKZ4	Rab11 family-interacting protein 1	RAB11FIP1	DTASAIIPSTTPSVD	SDDE	SVVKDKKKKSKI
0.0401849	-0.920432	0.00697485	S	267	Q6JBY9	CapZ-interacting protein	RCSD1	DRATEEAKNGEKARR	SSEE	VDGQHPAQEEVP
0.029581	-0.978922	0.00458092	S	142	Q86Y82	Syntaxin-12	STX12	KEKESIARARAGSRL	SAEE	RQREEQLVSFDS
0.00533546	-0.981884	0.00448205	S	1164	Q5T1M5	FK506-binding protein 15	FKBP15	GAALRPSHHSQRSSL	SGDE	EDELFKGATLKA
0.0327862	-0.987347	0.00430471	S	4368	Q14204	Cytoplasmic dynein 1 heavy chain 1	DYNC1H1	DDLAYAETEKKTRTD	STSD	GRPAWMRTLHTT
0.0287732	-1.00375	0.00380919	S	1721	Q15149	Plectin	PLEC	TAQRSAEAELQSKRA	SFAE	KTAQLERSLQEE
0.0467826	-1.0343	0.00302073	S	77	O95685	Protein phosphatase 1 regulatory subunit 3D	PPP1R3D	PRLRPIILRRARSLP	SSPE	RRQKAAGAPGAA
0.0133358	-1.05966	0.0024816	S	645	Q05655	Protein kinase C delta type;Protein kinase C delta type regulatory subunit;Protein kinase C delta type catalytic subunit	PRKCD	YSNFDQEFLNEKARL	SYSD	KNLIDSMDQSAF
0.0172962	-1.20652	0.000737577	T	291	Q9UJU6	Drebrin-like protein	DBNL	PQPGKLRSPFLQKQL	TQPE	THFGREPAAAIS
0.0313622	-1.26896	0.000423625	S	944	Q8TDJ6	DmX-like protein 2	DMXL2	SSESLLSVPGQKNVD	SSPE	TSPSVSPMPHSS
0.0400747	-1.84279	8.6362e-07	S	1443	P46940	Ras GTPase-activating-like protein IQGAP1	IQGAP1	AIRDAKTPDKMKKSK	SVKE	DSNLTLQEKKEK
0.0215018	-3.34448	0	S	2409	P11717	Cation-independent mannose-6-phosphate receptor	IGF2R	KSVKALSSLHGDDQD	SEDE	VLTIPEVKVHSG

## Sheet: CDK substrate motif
p-value	FC RELAPSE/REL-FREE	FC significance	Amino acid	Position	Protein	Protein names	Gene names	Sequence window*				*The 31 aminoacids sequence windows are displayed
0.0228904	1.01007	0.00136877	S	58	Q9H6F5	Coiled-coil domain-containing protein 86	CCDC86	REPGSPPSVQRAGLG	SPER	PPKTSPGSPRLQ		discontinously in order to show the potential CDKs substrate motifs
0.0206442	0.986098	0.00174699	S	493	O60825	6-phosphofructo-2-kinase/fructose-2,6-bisphosphatase 2;6-phosphofructo-2-kinase;Fructose-2,6-bisphosphatase	PFKFB2	RPRNYSVGSRPLKPL	SPLR	AQDMQEGAD___		in red (phosphosite is located at the 16th position)
0.0451331	0.955304	0.00237175	S	123	P49916-3	DNA ligase 3	LIG3	KAVVQAKLTTTGQVT	SPVK	GASFVTSTNPRK
0.0470664	0.904229	0.00386408	S	1424	Q02880	DNA topoisomerase 2-beta	TOP2B	EFVPSDGLDKDEYTF	SPGK	SKATPEKSLHDK
0.00569366	0.863533	0.00560557	S	91	Q9H6F5	Coiled-coil domain-containing protein 86	CCDC86	AGLESPQGQPEPGAA	SPQR	QQDLHLESPQRQ
0.0184162	0.662217	0.0284242	S	567	Q9ULU4-12	Protein kinase C-binding protein 1	ZMYND8	LSESVQQQSTPVPLI	SPKR	QIRSRFQLNLDK
0.000605795	0.622974	0.0374269	S	1057	Q8N1G0	Zinc finger protein 687	ZNF687	EKHVQVRHGLQLGAQ	SPGR	GTTLARGSSARA
0.0146785	0.581583	0.0493174	S	1362	Q12888	Tumor suppressor p53-binding protein 1	TP53BP1	ADFALPSSRGGPGKL	SPRK	GVSQTGTPVCEE
0.00865435	-0.65014	0.0377509	S	1010	Q5VUA4	Zinc finger protein 318	ZNF318	SREPTEKPGKAEKSK	SPEK	VSSFSNSSSNKE
0.0122733	-0.684937	0.0310841	S	417	O15027	Protein transport protein Sec16A	SEC16A	VSQNYRGSVSQPSTP	SPPK	PTGIFQTSANSS
0.0110238	-0.805922	0.0150041	T	53	P17096	High mobility group protein HMG-I/HMG-Y	HMGA1	GTALVGSQKEPSEVP	TPKR	PRGRPKGSKNKG

## Sheet: PRKCA PRKCD substrate motif
p-value	FC RELAPSE/REL-FREE	FC significance	Amino acid	Position	Protein	Protein names	Gene names	Sequence window*				*The 31 aminoacids sequence windows are displayed
0.0351048	1.83196	1.24311e-08	S	1044	Q9P266	Junctional protein associated with coronary artery disease	KIAA1462	GAGLPLSLSNKN	RGLS	APDLRSVGLTPGQEQ		discontinously in order to show the potential PRKCA and PRKCD substrate motifs
0.000682192	1.76917	3.78202e-08	S	608	Q9H165	B-cell lymphoma/leukemia 11A	BCL11A	ESDRIDDGTVNG	RGCS	PGESASGGLSKKLLL		in red (phosphosite is located at the 16th position)
0.0122728	1.5888	7.49456e-07	S	134	P12980	Protein lyl-1	LYL1	GPFSIFPSSRLK	RRPS	HCELDLAEGHQPQKV
0.000355986	1.48966	3.39207e-06	S	472	Q76N32-2	Centrosomal protein of 68 kDa	CEP68	SQSARRPTCTES	RWKS	EEEVESDDEYLALPA
0.0437492	1.21667	0.000134254	S	1014	Q5T200	Zinc finger CCCH domain-containing protein 13	ZC3H13	KKKSIEKKRKKS	KGDS	DISDEEAAQQSKKKR
0.00343599	1.00805	0.00139745	S	170	O75367-2	Core histone macro-H2A.1	H2AFY	ARKSKKKQGEVS	KAAS	ADSTTEGTPADGFTV
0.00204292	1.00091	0.00150347	S	1406	P27708	CAD protein;Glutamine-dependent carbamoyl-phosphate synthase;Aspartate carbamoyltransferase;Dihydroorotase	CAD	LVINLSMRGAGG	RRLS	SFVTKGYRTRRLAAD
0.0399925	0.986358	0.00174243	S	52	Q13574	Diacylglycerol kinase zeta	DGKZ	SPAGQASSSLAQ	RRRS	SAQLQGCLLSCGVRA
0.0399925	0.986358	0.00174243	S	53	Q13574	Diacylglycerol kinase zeta	DGKZ	PAGQASSSLAQR	RRSS	AQLQGCLLSCGVRAQ
0.0206442	0.986098	0.00174699	S	483	O60825	6-phosphofructo-2-kinase/fructose-2,6-bisphosphatase 2;6-phosphofructo-2-kinase;Fructose-2,6-bisphosphatase	PFKFB2	TPLSSSNTIRRP	RNYS	VGSRPLKPLSPLRAQ
0.0206442	0.986098	0.00174699	S	493	O60825	6-phosphofructo-2-kinase/fructose-2,6-bisphosphatase 2;6-phosphofructo-2-kinase;Fructose-2,6-bisphosphatase	PFKFB2	RPRNYSVGSRPL	KPLS	PLRAQDMQEGAD___
0.0307261	0.945538	0.00260852	S	485	Q14676	Mediator of DNA damage checkpoint protein 1	MDC1	VLKDHTKIRALV	RAHS	EKDQPPFGDSDDSVE
0.0111461	0.930479	0.00301566	S	14	Q9UBM7	7-dehydrocholesterol reductase	DHCR7	__MAAKSQPNIP	KAKS	LDGVTNDRTASQGQW
0.0203442	0.923261	0.0032304	S	430	Q70J99	Protein unc-13 homolog D	UNC13D	SVFPLSVSDSPA	RLQS	LLRVLVQMCKMKAFG
0.0072576	0.918918	0.00336614	S	556	Q9NPH3	Interleukin-1 receptor accessory protein	IL1RAP	QLQVAMPVKKSP	RRSS	SDEQGLSYSSLKNV_
0.0429895	0.888536	0.00446807	S	498	Q9H7N4	Splicing factor, arginine/serine-rich 19	SCAF1	RRKILTQRRERY	RQRS	PSPAPAPAPAAAAGP
0.0139931	0.865566	0.00550431	S	782	P09874	Poly [ADP-ribose] polymerase 1	PARP1	NLLDIEVAYSLL	RGGS	DDSSKDPIDVNYEKL
0.0339272	0.865446	0.00551023	S	1620	Q9C0C2	182 kDa tankyrase-1-binding protein	TNKS1BP1	HLFQDSTEPRAS	RVPS	SDEEVVEEPQSRRTR
0.0203681	0.822672	0.00802318	S	246	Q15365	Poly(rC)-binding protein 1	PCBP1	SPLDLAKLNQVA	RQQS	HFAMMHGGTGFAGID
0.0443513	0.816118	0.00848638	S	7	P05114	Non-histone chromosomal protein HMG-14	HMGN1	_________MPK	RKVS	SAEGAAKEEPKRRSA
0.016622	0.807141	0.00915885	S	14	P42696	RNA-binding protein 34	RBM34	__MALEGMSKRK	RKRS	VQEGENPDDGVRGSP
0.0135263	0.80593	0.00925298	S	36	P29590	Protein PML	PML	PTMPPPETPSEG	RQPS	PSPSPTERAPASEEE
0.0438496	0.795803	0.0100745	S	75	Q96S55	ATPase WRNIP1	WRNIP1	RAKGPSPPGAKR	RRLS	ESSALKQPATPTAAE
0.0152247	0.778332	0.0116417	S	403	P29590	Protein PML	PML	SCITQGKDAAVS	KKAS	PEAASTPRDPIDVDL
0.0249986	0.767836	0.0126816	S	398	Q8N1F8	Serine/threonine-protein kinase 11-interacting protein	STK11IP	PLLHKVKSRVRV	RRAS	ISEPSDTDPEPRTLN
0.0271089	0.754702	0.0140954	S	179	Q6JBY9	CapZ-interacting protein	RCSD1	SIKRRPPSRRFR	RSQS	DCGELGDFRAVESSQ
0.00313359	0.737476	0.0161541	S	2367	Q5UIP0-2	Telomere-associated protein RIF1	RIF1	DISEKTVNGIEN	KSLS	PDEERLVSDIIDPVA
0.0141611	0.730659	0.0170371	S	403	Q9P2N6-6	KAT8 regulatory NSL complex subunit 3	KANSL3	RDLAFEVPERGS	RPAS	PAAKLPASPSGSEDL
0.0077919	0.689572	0.0232793	S	185	Q8IWC1-2	MAP7 domain-containing protein 3	MAP7D3	AMANSESKTANK	RSAS	TEKLEQGTSALIRQM
0.0200009	0.66605	0.0276507	S	215	Q96T37-4	Putative RNA-binding protein 15	RBM15	PLKIEAVYVSRR	RSRS	PLDKDTYPPSASVVG
0.0458655	0.648677	0.0313018	S	442	Q13422	DNA-binding protein Ikaros	IKZF1	SLKEEHRAYDLL	RAAS	ENSQDALRVVSTSGE
0.021639	0.645571	0.0319949	S	184	P41212	Transcription factor ETV6	ETV6	VHHNPPTIELLH	RSRS	PITTNHRPSPDPEQR
0.00154692	0.637284	0.0339061	S	199	P51825	AF4/FMR2 family member 1	AFF1	DHCASVTDSAPE	RELS	PLISLPSPVPPLSPI
0.0463443	0.631668	0.0352539	S	211	O95210	Starch-binding domain-containing protein 1	STBD1	DRVDHEEWEMVP	RHSS	WGDVGVGGSLKAPVL
0.0392626	0.611308	0.0405133	S	413	O15014	Zinc finger protein 609	ZNF609	SSKTRAGANSKG	RRGS	QNSSEHRPPASSTSE
0.0286589	0.595897	0.0449037	S	415	O00257	E3 SUMO-protein ligase CBX4	CBX4	HAVGLNLSHVRK	RCLS	ETHGEREPCKKRLTA
0.017206	0.594279	0.0453863	S	328	Q92922	SWI/SNF complex subunit SMARCC1	SMARCC1	RRDRKASANARK	RKHS	PSPPPPTPTESRKKS
0.00344372	0.593414	0.0456457	S	18	Q9H6F5	Coiled-coil domain-containing protein 86	CCDC86	TPLRRSRRLGGL	RPES	PESLTSVSRTRRALV
0.0397952	-0.601121	0.0490767	S	237	Q86TI0-2	TBC1 domain family member 1	TBC1D1	TGSQEPVRRPMR	KSFS	QPGLRSLAFRKELQD
0.0498761	-0.605802	0.0478896	S	74	O95685	Protein phosphatase 1 regulatory subunit 3D	PPP1R3D	GCDPRLRPIILR	RARS	LPSSPERRQKAAGAP
0.00318808	-0.628119	0.042543	S	61	Q6PJF5-2	Inactive rhomboid protein 2	RHBDF2	SMLPERKNPAYL	KSVS	LQEPRSRWQESSEKR
0.0126565	-0.63632	0.0407039	S	483	Q96Q42	Alsin	ALS2	VDIREEETEGGS	RRLS	LPGLLSQVSPRLLRK
0.0358291	-0.639587	0.0399894	S	443	Q96JM3	Chromosome alignment-maintaining phosphoprotein 1	CHAMP1	PEIRSPAGSPEL	RKPS	GSPDLWKLSPDQRKT
0.0370888	-0.641233	0.0396333	S	1210	Q04637-8	Eukaryotic translation initiation factor 4 gamma 1	EIF4G1	SRERPSQPEGLR	KAAS	LTEDRDRGRDAVKRE
0.0285445	-0.644456	0.0389435	S	235	Q96PM5-6	RING finger and CHY zinc finger domain-containing protein 1	RCHY1	ICESYNTAQAGG	RRIS	LDQQ___________
0.00865435	-0.65014	0.0377509	S	1010	Q5VUA4	Zinc finger protein 318	ZNF318	SREPTEKPGKAE	KSKS	PEKVSSFSNSSSNKE
0.0387053	-0.655669	0.0366197	S	572	Q7Z417	Nuclear fragile X mental retardation-interacting protein 2	NUFIP2	EHPVFPKAYELE	KRTS	PQVLGSILKSGTTSE
0.0129397	-0.657471	0.036257	S	72	P51149	Ras-related protein Rab-7a	RAB7A	VTMQIWDTAGQE	RFQS	LGVAFYRGADCCVLV
0.013067	-0.659794	0.0357938	S	956	Q5T1M5	FK506-binding protein 15	FKBP15	SEEEEEKAEERP	RRPS	QEQSASASSGQPQAP
0.00704778	-0.666753	0.0344351	S	521	Q07866-7	Kinesin light chain 1	KLC1	VAEVLNDPENME	KRRS	RESLNVDVVKYESGP
0.0272929	-0.673351	0.0331865	S	980	Q4ADV7-3	Protein RIC1 homolog	KIAA1432	PSSSGGFEFFRN	RSIS	LSQSAENVPASKFSL
0.0128239	-0.684775	0.0311128	S	663	Q641Q2	WASH complex subunit FAM21A	FAM21A	SGTLQSQEAKAV	KKTS	LFEEDEEDDLFAIAK
0.0133207	-0.688773	0.0304127	S	2739	Q6ZNJ1	Neurobeachin-like protein 2	NBEAL2	SSQFARKLWRSS	RRIS	QVSSGETEYNPTEAR
0.0325302	-0.697531	0.028925	S	270	Q9H3N1	Thioredoxin-related transmembrane protein 1	TMX1	EGTNKDFPQNAI	RQRS	LGPSLATDKS_____
9.66878e-05	-0.701171	0.0283248	S	152	Q9H6H4	Receptor expression-enhancing protein 4	REEP4	ATKSQGALAGRL	RSFS	MQDLRSISDAPAPAY
0.0419948	-0.713157	0.0264209	S	390	P57081-2	tRNA (guanine-N(7)-)-methyltransferase non-catalytic subunit WDR4	WDR4	EERLQQQLEKKQ	RRRS	PPPGPDGHAKKMRPG
0.0423849	-0.726828	0.0243813	S	243	Q9C0B5-2	Palmitoyltransferase ZDHHC5	ZDHHC5	KIMDNGIQGELR	RTKS	KGSLEITESQSADAE
0.00784687	-0.728441	0.0241496	S	310	Q14669-2	E3 ubiquitin-protein ligase TRIP12	TRIP12	LQAKLASLRKST	KKRS	ESPPAELPSLRRSTR
0.00784687	-0.728441	0.0241496	S	312	Q14669-2	E3 ubiquitin-protein ligase TRIP12	TRIP12	AKLASLRKSTKK	RSES	PPAELPSLRRSTRQK
0.0124616	-0.730015	0.0239252	S	114	Q12982	BCL2/adenovirus E1B 19 kDa protein-interacting protein 2	BNIP2	DDLPKPKTTEVI	RKGS	ITEYTAAEEKEDGRR
0.0112477	-0.7303	0.0238848	S	100	Q96SB3	Neurabin-2	PPP1R9B	RASERGVRLSLP	RASS	LNENVDHSALLKLGT
0.0335269	-0.733224	0.0234734	S	2739	Q6ZNJ1	Neurobeachin-like protein 2	NBEAL2	SSQFARKLWRSS	RRIS	QVSSGETEYNPTEAR
0.0380472	-0.735974	0.0230918	S	716	O60271-4	C-Jun-amino-terminal kinase-interacting protein 4	SPAG9	DVAGLDTEGSKQ	RSAS	QSSLDKLDQELKEQQ
0.0257997	-0.751655	0.0210148	S	269	Q9UJU6	Drebrin-like protein	DBNL	AVHPREIFKQKE	RAMS	TTSISSPQPGKLRSP
0.016158	-0.769755	0.018816	S	105	Q8NE71	ATP-binding cassette sub-family F member 1	ABCF1	DDGEEKELMERL	KKLS	VPTSDEEDEVPAPKP
0.0403155	-0.774897	0.0182283	S	268	Q6JBY9	CapZ-interacting protein	RCSD1	RATEEAKNGEKA	RRSS	EEVDGQHPAQEEVPE
0.0102508	-0.787856	0.016816	S	272	Q96D71-3	RalBP1-associated Eps domain-containing protein 1	REPS1	RTVASATTAIEI	RRQS	SSYDDPWKITDEQRQ
0.0251266	-0.788978	0.0166982	S	24	Q15435	Protein phosphatase 1 regulatory subunit 7	PPP1R7	QQQSQEMMEVDR	RVES	EESGDEEGKKHSSGI
0.0102656	-0.808866	0.0147253	S	243	Q06210-2	Glutamine--fructose-6-phosphate aminotransferase [isomerizing] 1	GFPT1	TGKDKKGSCNLS	RVDS	TTCLFPVEEKAVEYY
0.0275112	-0.815221	0.0141386	S	9	P51798	H(+)/Cl(-) exchange transporter 7	CLCN7	_______MANVS	KKVS	WSGRDRDDEEAAPLL
0.00498854	-0.818828	0.0138147	S	3808	Q7Z6Z7	E3 ubiquitin-protein ligase HUWE1	HUWE1	TSESSQSEASVR	REES	PMDVDQPSPSAQDTQ
0.0328342	-0.831347	0.0127397	S	5780	Q09666	Neuroblast differentiation-associated protein AHNAK	AHNAK	KGKFSLFKSKKP	RHRS	NSFSDEREFSGPSTP
0.0142578	-0.8426	0.0118359	S	268	P34910	Protein EVI2B	EVI2B	CMDNIRENEIST	KRTS	IISLTPWKPSKSTLL
0.0291969	-0.861081	0.0104721	S	1107	Q9NSY1	BMP-2-inducible protein kinase	BMP2K	RADHNTVLPGRP	RQNS	LHGSFHSADVLKMDD
0.00949354	-0.893374	0.00841575	S	1379	A6NC98	Coiled-coil domain-containing protein 88B	CCDC88B	DGTGSPSPAPMR	RAQS	SLCLRDETLAGGQRR
0.0453918	-0.941855	0.0059932	S	469	Q5HYW2	NHS-like protein 2	NHSL2	MPMVTQSDLRSV	RLRS	VSKSEPEDDIESPEY
0.0325411	-0.966258	0.00502593	S	409	Q15036	Sorting nexin-17	SNX17	KMLRRRVGGTLR	RSDS	QQAVKSPPLLESPDA
0.029581	-0.978922	0.00458092	S	139	Q86Y82	Syntaxin-12	STX12	VSEKEKESIARA	RAGS	RLSAEERQREEQLVS
0.0327862	-0.987347	0.00430471	S	4368	Q14204	Cytoplasmic dynein 1 heavy chain 1	DYNC1H1	DDLAYAETEKKT	RTDS	TSDGRPAWMRTLHTT
0.0441142	-1.00159	0.00387155	S	389	Q15418-2	Ribosomal protein S6 kinase alpha-1	RPS6KA1	GIPPSAGAHQLF	RGFS	FVATGLMEDDGKPRA
0.0287732	-1.00375	0.00380919	S	1721	Q15149	Plectin	PLEC	TAQRSAEAELQS	KRAS	FAEKTAQLERSLQEE
0.0397797	-1.02547	0.00323203	S	210	Q09666	Neuroblast differentiation-associated protein AHNAK	AHNAK	VDVETQSGKTVI	RLPS	GSGAASPTGSAVDIR
0.0488472	-1.02843	0.00315991	S	11	Q92685	Dol-P-Man:Man(5)GlcNAc(2)-PP-Dol alpha-1,3-mannosyltransferase	ALG3	_____MAAGLRK	RGRS	GSAAQAEGLCKQWLQ
0.0488472	-1.02843	0.00315991	S	13	Q92685	Dol-P-Man:Man(5)GlcNAc(2)-PP-Dol alpha-1,3-mannosyltransferase	ALG3	___MAAGLRKRG	RSGS	AAQAEGLCKQWLQRA
0.0426351	-1.04616	0.00275668	S	1354	Q13459	Unconventional myosin-IXb	MYO9B	RATGAALTPTEE	RRTS	FSTSDVSKLLPSLAK
0.0149736	-1.05752	0.00252335	S	141	Q13177	Serine/threonine-protein kinase PAK 2;PAK-2p27;PAK-2p34	PAK2	VLKFYDSNTVKQ	KYLS	FTPPEKDGFPSGTPA
0.0314086	-1.07728	0.00215987	S	1174	Q9Y4H2	Insulin receptor substrate 2	IRS2	TPVSPSFAHNPK	RHNS	ASVENVSLRKSSEGG
0.00590023	-1.08256	0.00207114	S	4386	Q15149	Plectin	PLEC	DMLSGNAGGFRS	RSSS	VGSSSSYPISPAVSR
0.0441643	-1.15037	0.00119069	S	210	Q5HYW2	NHS-like protein 2	NHSL2	LRKAKKKPSPPT	RSVS	LVKDEPGLLPEGGSA
0.0348712	-1.1683	0.00102397	S	10	Q9H3Z4	DnaJ homolog subfamily C member 5	DNAJC5	______MADQRQ	RSLS	TSGESLYHVLGLDKN
0.047972	-1.17939	0.000931815	S	518	P32942	Intercellular adhesion molecule 3	ICAM3	VLALMYVFREHQ	RSGS	YHVREESTYLPLTSM
0.0145909	-1.19875	0.000788994	S	362	Q5T4S7-3	E3 ubiquitin-protein ligase UBR4	UBR4	MAILHVGSAQQV	RTGS	TSSKEDDYESDAATI
0.0172962	-1.20652	0.000737577	T	291	Q9UJU6	Drebrin-like protein	DBNL	PQPGKLRSPFLQ	KQLT	QPETHFGREPAAAIS
0.0307726	-1.21528	0.000683324	S	230	Q96B97	SH3 domain-containing kinase-binding protein 1	SH3KBP1	FGDIFKDKPIKL	RPRS	IEVENDFLPVEKTIG
0.00812731	-1.2397	0.000550924	S	4386	Q15149	Plectin	PLEC	DMLSGNAGGFRS	RSSS	VGSSSSYPISPAVSR
0.0251687	-1.32632	0.00024938	S	322	Q86WC4	Osteopetrosis-associated transmembrane protein 1	OSTM1	SEQKKRKLILPK	RLKS	STSFANIQENSN___
0.0129015	-1.34362	0.000211722	S	2149	Q99698	Lysosomal-trafficking regulator	LYST	NIADTYVATQSK	KQNS	LGSSDTLKKGKEDAF
0.0164544	-1.42322	9.74156e-05	S	891	Q4KMQ2-3	Anoctamin-6	ANO6	AERMIEAVDNNL	RPKS	E______________
0.0080617	-1.57985	1.89167e-05	S	304	Q05655	Protein kinase C delta type;Protein kinase C delta type regulatory subunit;Protein kinase C delta type catalytic subunit	PRKCD	EALNQVTQRASR	RSDS	ASSEPVGIYQGFEKK
0.0400747	-1.84279	8.6362e-07	S	1443	P46940	Ras GTPase-activating-like protein IQGAP1	IQGAP1	AIRDAKTPDKMK	KSKS	VKEDSNLTLQEKKEK
0.018686	-1.86223	6.76054e-07	S	159	Q9NSC5	Homer protein homolog 3	HOMER3	VSANGPGEEKLF	RSQS	ADAPGPTERERLKKM
